# Supplementary material for: A positive feedback loop between ZEB2 and ACSL4 regulates lipid metabolism to promote breast cancer metastasis
Source: eLife. 2023 Dec 11;12:RP87510. doi: 10.7554/eLife.87510 (PMC10712958; doi:10.7554/eLife.87510)
Supplement: Figure 1—source data 1. [file elife-87510-fig1-data1.xls]

ID	MCF7	EPI	log2FoldChange	pvalue	padj	GeneName	Chrom	Strand	Start	End	GeneLength	GeneType	GeneDescription
ENSG00000115461	157009.272167543	4.22402546552972	-15.1413955795363	3.50635953451233e-86	9.45524912076596e-82	IGFBP5	chr2	-	216672105	216695525	6442	protein_coding	insulin_like_growth_factor_binding_protein_5
ENSG00000171345	47206.7745789395	1.05955866386509	-15.288326280769	7.05170429887745e-77	9.50781290617647e-73	KRT19	chr17	-	41523617	41528308	2336	protein_coding	keratin_19_type_I
ENSG00000160182	21646.7060273511	1.38777878078145e-17	-17.4039242659386	7.74363419213575e-70	6.96049465417108e-66	TFF1	chr21	-	42362282	42366594	551	protein_coding	trefoil_factor_1
ENSG00000135821	19846.4475087113	1.38777878078145e-17	-17.2786583294079	6.75827789968111e-69	4.55609304607002e-65	GLUL	chr1	-	182381704	182392206	9032	protein_coding	glutamate-ammonia_ligase
ENSG00000091831	18732.5434753238	2.11437967028788	-13.0333048093025	9.97480165645917e-66	5.37961002936156e-62	ESR1	chr6	+	151656691	152129619	13629	protein_coding	estrogen_receptor_1
ENSG00000235123	13710.0212890277	1.38777878078145e-17	-16.7450125539249	6.8618718104176e-65	3.08395392066202e-61	DSCAM-AS1	chr21	+	40383083	40385358	1769	antisense	DSCAM_antisense_RNA_1
ENSG00000085563	60.6678451422579	95003.8799973115	10.6097714195225	1.4810580248202e-64	5.70545867104306e-61	ABCB1	chr7	-	87503633	87713323	5806	protein_coding	ATP_binding_cassette_subfamily_B_member_1
ENSG00000196562	21585.0858042276	6.33370047263656	-11.7075817076855	2.75337152021235e-63	9.28092705175579e-60	SULF2	chr20	-	47656348	47786616	6657	protein_coding	sulfatase_2
ENSG00000124664	10488.7056247934	1.05955866386509	-13.1181828379908	1.40875427038524e-60	4.2209408505787e-57	SPDEF	chr6	-	34537802	34556333	1914	protein_coding	SAM_pointed_domain_containing_ETS_transcription_factor
ENSG00000196542	30123.7527222734	22.1564016332808	-10.4011602979252	2.89942141806658e-60	7.81857979595835e-57	SPTSSB	chr3	-	161344792	161372880	3745	protein_coding	serine_palmitoyltransferase_small_subunit_B
ENSG00000101144	8324.41378797858	1.38777878078145e-17	-16.0252111218639	1.71663969368681e-59	4.20826417999622e-56	BMP7	chr20	-	57168748	57266629	5418	protein_coding	bone_morphogenetic_protein_7
ENSG00000087303	6.63157350604578	13932.4435955667	11.0089693486112	3.32175523024682e-59	7.46453762823631e-56	NID2	chr14	-	52004803	52069228	6392	protein_coding	nidogen_2
ENSG00000128591	15.1636435283222	21312.1637093873	10.4446096577121	4.4496543707815e-59	9.22995228942262e-56	FLNC	chr7	+	128830377	128859274	9280	protein_coding	filamin_C
ENSG00000113494	11791.262341293	3.16919693313913	-11.8076361570152	6.87616326737941e-59	1.32444727620109e-55	PRLR	chr5	-	35048756	35230589	13108	protein_coding	prolactin_receptor
ENSG00000039068	23692.4974350511	18.9918569258258	-10.2757364999105	1.10185982714985e-58	1.98085013992819e-55	CDH1	chr16	+	68737225	68835548	6177	protein_coding	cadherin_1_type_1
ENSG00000153993	10.4236106947186	14707.7572438893	10.4447393333216	2.12179706100914e-57	3.57602372169827e-54	SEMA3D	chr7	-	84995553	85186855	8062	protein_coding	sema_domain_immunoglobulin_domain_(Ig)_short_basic_domain_secreted_(semaphorin)_3D
ENSG00000083307	6744.09206568114	1.38777878078145e-17	-15.7214919188424	3.22471022706436e-57	5.11514917547162e-54	GRHL2	chr8	+	101492432	101669726	6060	protein_coding	grainyhead-like_transcription_factor_2
ENSG00000116299	15555.7839724422	11.6079237420807	-10.3732712303051	5.25017094088459e-57	7.86533942177188e-54	KIAA1324	chr1	+	109113679	109206781	9300	protein_coding	KIAA1324
ENSG00000084207	2.83950028546094	9130.77321846089	11.5866447126554	5.56230917490534e-57	7.89438048476302e-54	GSTP1	chr11	+	67583595	67586660	1915	protein_coding	glutathione_S-transferase_pi_1
ENSG00000076706	6.63157350604578	10794.2693047328	10.6407902416977	1.91067006367231e-56	2.57615644684937e-53	MCAM	chr11	-	119308529	119321521	7422	protein_coding	melanoma_cell_adhesion_molecule
ENSG00000229807	5915.53706549932	1.38777878078145e-17	-15.5323807134317	8.39537491986817e-56	1.07804609566269e-52	XIST	chrX	-	73820651	73852753	19931	lincRNA	X_inactive_specific_transcript_(non-protein_coding)
ENSG00000137573	9403.24169437378	6.33370047263656	-10.5087881704347	2.68277235743143e-54	3.28834724502254e-51	SULF1	chr8	+	69466624	69660915	9404	protein_coding	sulfatase_1
ENSG00000089356	8404.04607632428	5.2788609071888	-10.6041810758822	9.62694251961634e-54	1.12869622601728e-50	FXYD3	chr19	+	35115879	35124324	3334	protein_coding	FXYD_domain_containing_ion_transport_regulator_3
ENSG00000135069	2.83950028546094	6684.5795443431	11.1367514462165	1.29597964525275e-53	1.45614112974523e-50	PSAT1	chr9	+	78297143	78330093	2188	protein_coding	phosphoserine_aminotransferase_1
ENSG00000153395	7582.12710018301	4.22402546552972	-10.7693156626688	2.41922489301473e-53	2.60947273860141e-50	LPCAT1	chr5	-	1456480	1523977	6494	protein_coding	lysophosphatidylcholine_acyltransferase_1
ENSG00000165140	4540.93208805577	1.38777878078145e-17	-15.150869555259	5.93166436260124e-53	6.15204850776558e-50	FBP1	chr9	-	94603133	94640249	1668	protein_coding	fructose-bisphosphatase_1
ENSG00000113140	6.63157350604578	7738.37319697329	10.1606332129917	7.51341013299077e-53	7.50394880171219e-50	SPARC	chr5	-	151661096	151687165	4831	protein_coding	secreted_protein_acidic_cysteine-rich_(osteonectin)
ENSG00000167601	14.215637608667	11490.4693154732	9.64570185894322	7.99257027977523e-53	7.69741607730067e-50	AXL	chr19	+	41219203	41261766	5154	protein_coding	AXL_receptor_tyrosine_kinase
ENSG00000007038	3.7875259485201	6167.70377878673	10.6208572579394	9.56913857798069e-53	8.89797899633887e-50	PRSS21	chr16	+	2817180	2826304	1967	protein_coding	protease_serine_21
ENSG00000184564	12935.5024845327	17.9370088411536	-9.48455686961874	1.66573162217156e-52	1.49727063078261e-49	SLITRK6	chr13	-	85792790	85799488	4318	protein_coding	SLIT_and_NTRK_like_family_member_6
ENSG00000130508	4301.08721957264	1.38777878078145e-17	-15.0725847703478	2.27878280883186e-52	1.98224700719225e-49	PXDN	chr2	-	1631887	1744852	11257	protein_coding	peroxidasin
ENSG00000117983	15003.0979711942	23.2112499784401	-9.32877875386822	4.2457247657048e-52	3.57781918849986e-49	MUC5B	chr11	+	1223066	1262172	18598	protein_coding	mucin_5B_oligomeric_mucus/gel-forming
ENSG00000206190	1.38777878078145e-17	4130.79132306994	15.0143002253862	6.26408928984754e-52	5.0235658479551e-49	ATP10A	chr15	-	25677273	25865172	8409	protein_coding	ATPase_class_V_type_10A
ENSG00000110975	4704.93668191864	1.05955866386509	-11.9616152414618	6.33394789106555e-52	5.0235658479551e-49	SYT10	chr12	-	33374238	33439819	5082	protein_coding	synaptotagmin_10
ENSG00000079257	4647.108472522	1.05955866386509	-11.943773747305	8.61406765076937e-52	6.63676995058991e-49	LXN	chr3	-	158645822	158672693	1504	protein_coding	latexin
ENSG00000182963	3.7875259485201	5580.15316365204	10.4764314631665	1.15061752627137e-51	8.6187645037316e-49	GJC1	chr17	-	44798448	44830816	8660	protein_coding	gap_junction_protein_gamma_1
ENSG00000100285	11.3716180425464	9012.63018633486	9.61408148232562	1.35130662460389e-51	9.84846876731583e-49	NEFH	chr22	+	29480230	29491390	3783	protein_coding	neurofilament_heavy_polypeptide
ENSG00000165731	9392.81365661427	11.6079237420807	-9.64545727905176	1.47795332079903e-51	1.04880234864912e-48	RET	chr10	+	43077027	43130351	6661	protein_coding	ret_proto-oncogene
ENSG00000166710	3940.84591512735	1.38777878078145e-17	-14.9463926857883	1.98654562965342e-51	1.3733311585484e-48	B2M	chr15	+	44711477	44718877	6089	protein_coding	beta-2-microglobulin
ENSG00000147041	3937.05390139631	1.38777878078145e-17	-14.9450038535996	2.03712995408796e-51	1.3733311585484e-48	SYTL5	chrX	+	38006582	38128819	4791	protein_coding	synaptotagmin_like_5
ENSG00000147065	7.57958445112432	7152.932278846	9.85782775975767	2.41248675884506e-51	1.58671019363453e-48	MSN	chrX	+	65588377	65741931	5971	protein_coding	moesin
ENSG00000224078	2.83950028546094	5323.82497787421	10.8083844028795	3.68939307179872e-51	2.36876603747915e-48	SNHG14	chr15	+	24978583	25419462	36573	processed_transcript	small_nucleolar_RNA_host_gene_14
ENSG00000128833	6571.55544092997	5.2788609071888	-10.2493380743264	4.33616241626217e-51	2.71927803992851e-48	MYO5C	chr15	-	52192322	52295798	10045	protein_coding	myosin_VC
ENSG00000101680	4.73554534719345	5600.19528517373	10.1689002825215	7.5683567849153e-51	4.63837066050059e-48	LAMA1	chr18	-	6941744	7117814	15872	protein_coding	laminin_subunit_alpha_1
ENSG00000119125	1.89146593041347	4564.3340570465	11.1412795131263	1.80861796089439e-50	1.0838042651884e-47	GDA	chr9	+	72114595	72257193	7904	protein_coding	guanine_deaminase
ENSG00000166741	7.57958445112432	6311.16317494131	9.67720213602246	5.39836989820904e-50	3.16461831902402e-47	NNMT	chr11	+	114257787	114313285	2919	protein_coding	nicotinamide_N-methyltransferase
ENSG00000109321	16776.8123937236	36.924280507758	-8.82300389901716	5.92378364596522e-50	3.39873935738506e-47	AREG	chr4	+	74445134	74455009	1648	protein_coding	amphiregulin
ENSG00000060982	6.63157350604578	5854.41377394864	9.75813483405247	7.64643154362552e-50	4.29570152094595e-47	BCAT1	chr12	-	24810022	24949459	11775	protein_coding	branched_chain_amino-acid_transaminase_1_cytosolic
ENSG00000133424	3801.48941051136	1.05955866386509	-11.6540141194379	1.24886168131707e-49	6.87281716293798e-47	LARGE	chr22	-	33162226	33922841	10687	protein_coding	like-glycosyltransferase
ENSG00000138829	18.007660057365	9852.28959322999	9.08540595709582	1.44467074502366e-49	7.79139826206162e-47	FBN2	chr5	-	128257909	128659185	13196	protein_coding	fibrillin_2
ENSG00000170315	3260.17945039304	1.38777878078145e-17	-14.672848593789	2.16864699388553e-49	1.14666146739446e-46	UBB	chr17	+	16380798	16382745	1621	protein_coding	ubiquitin_B
ENSG00000163993	5524.95965122271	5.2788609071888	-9.99907248807192	3.19301729189481e-49	1.65582508256222e-46	S100P	chr4	+	6693069	6697170	1280	protein_coding	S100_calcium_binding_protein_P
ENSG00000164237	3162.53509681414	1.38777878078145e-17	-14.6289804720741	4.61006770133779e-49	2.34556765347689e-46	CMBL	chr5	-	10275875	10308026	3324	protein_coding	carboxymethylenebutenolidase_homolog_(Pseudomonas)
ENSG00000136231	1.38777878078145e-17	3027.41979083372	14.5659860852713	1.36533819240796e-48	6.81809438823573e-46	IGF2BP3	chr7	-	23310209	23470467	8511	protein_coding	insulin_like_growth_factor_2_mRNA_binding_protein_3
ENSG00000198959	38.8637574037154	14337.5054199965	8.5223766369936	7.93521112113724e-48	3.89056187441067e-45	TGM2	chr20	-	38127387	38166578	8036	protein_coding	transglutaminase_2
ENSG00000135525	2798.50177860836	1.38777878078145e-17	-14.4525613114173	9.43644970019661e-48	4.54398754670539e-45	MAP7	chr6	-	136342281	136550819	5447	protein_coding	microtubule_associated_protein_7
ENSG00000163347	8.5275940924434	5342.81225089481	9.26957342499285	1.36874742202445e-47	6.47537596180899e-45	CLDN1	chr3	-	190305701	190322475	3663	protein_coding	claudin_1
ENSG00000183853	2.83950028546094	3813.28192421832	10.3269673621863	1.42876736326574e-47	6.64278288238342e-45	KIRREL	chr1	+	157993273	158100262	7872	protein_coding	kin_of_IRRE_like_(Drosophila)
ENSG00000163220	2742.56957607008	1.38777878078145e-17	-14.4234362255573	1.55362364554698e-47	7.10085003827453e-45	S100A9	chr1	+	153357854	153361027	577	protein_coding	S100_calcium_binding_protein_A9
ENSG00000073792	12.3196249236669	6219.39135534244	8.96464307769314	4.0990893141158e-47	1.84226737407411e-44	IGF2BP2	chr3	-	185643739	185825056	4735	protein_coding	insulin_like_growth_factor_2_mRNA_binding_protein_2
ENSG00000182492	4.73554534719345	3756.32010515495	9.59275836087763	1.48417500173667e-46	6.56102673718544e-44	BGN	chrX	+	153494939	153509554	2453	protein_coding	biglycan
ENSG00000026025	3.7875259485201	3451.46888831407	9.78335639194895	1.68025083488323e-46	7.30800709894536e-44	VIM	chr10	+	17228259	17237593	4965	protein_coding	vimentin
ENSG00000127955	7.57958445112432	4529.52405650836	9.19866648735493	1.99101599738152e-46	8.52218053736349e-44	GNAI1	chr7	+	80133955	80219402	4547	protein_coding	guanine_nucleotide_binding_protein_(G_protein)_alpha_inhibiting_activity_polypeptide_1
ENSG00000108846	7043.66115041326	16.8821608614159	-8.69446991565639	2.4882086160739e-46	1.04839114907889e-43	ABCC3	chr17	+	50634777	50692252	9614	protein_coding	ATP_binding_cassette_subfamily_C_member_3
ENSG00000275216	1.89146593041347	3022.14554832769	10.5464676637954	4.87670355091991e-46	2.02315673775548e-43	RP11-54H7.4	chr13	+	109269634	109273838	4205	lincRNA	NA
ENSG00000085662	6.63157350604578	4071.71980700471	9.23426137707948	6.14001581908783e-46	2.50866161481094e-43	AKR1B1	chr7	-	134442350	134459284	3660	protein_coding	aldo-keto_reductase_family_1_member_B1_(aldose_reductase)
ENSG00000134215	4791.20499429706	8.44338646668029	-9.12799262463126	7.53003512720901e-46	3.03067055582565e-43	VAV3	chr1	-	107571160	107965144	7271	protein_coding	vav_guanine_nucleotide_exchange_factor_3
ENSG00000154277	36.9677493890957	11209.8796141749	8.23926973623698	1.31022070939082e-45	5.19579583079897e-43	UCHL1	chr4	+	41256413	41268455	2282	protein_coding	ubiquitin_C-terminal_hydrolase_L1
ENSG00000135842	20.8516752476805	7486.26440520332	8.47904896725971	1.46537286894346e-45	5.72684707013471e-43	FAM129A	chr1	-	184790724	184974550	8372	protein_coding	family_with_sequence_similarity_129_member_A
ENSG00000170558	1.89146593041347	2887.12494017275	10.4805307460722	1.5056036306461e-45	5.80001535771467e-43	CDH2	chr18	-	27950966	28177446	4950	protein_coding	cadherin_2_type_1_N-cadherin_(neuronal)
ENSG00000130513	4301.08721957264	7.38854262067175	-9.16195402903632	2.89507344503273e-45	1.0995570495599e-42	GDF15	chr19	+	18374731	18389176	2087	protein_coding	growth_differentiation_factor_15
ENSG00000124092	1.38777878078145e-17	2170.88280782576	14.0862017989728	4.98228791066242e-45	1.86600521942948e-42	CTCFL	chr20	-	57495966	57525652	8928	protein_coding	CCCTC-binding_factor_(zinc_finger_protein)-like
ENSG00000115457	2162.39147513137	1.38777878078145e-17	-14.0805539650931	5.394118690684e-45	1.9925726659313e-42	IGFBP2	chr2	+	216632828	216664436	4767	protein_coding	insulin_like_growth_factor_binding_protein_2
ENSG00000135318	4.73554534719345	3210.96343004266	9.36645242607023	7.16610498348469e-45	2.61136739168443e-42	NT5E	chr6	+	85449584	85495791	4533	protein_coding	5'-nucleotidase_ecto_(CD73)
ENSG00000111799	36.9677493890957	10363.8911162748	8.12606597820008	9.13867131657117e-45	3.28577880963544e-42	COL12A1	chr6	-	75084326	75206051	12481	protein_coding	collagen_type_XII_alpha_1
ENSG00000105825	7.57958445112432	3765.81374166552	8.93227643293145	1.90861546793497e-44	6.77206904057032e-42	TFPI2	chr7	-	93885397	93890991	2663	protein_coding	tissue_factor_pathway_inhibitor_2
ENSG00000050165	5.68356074469745	3233.11524856777	9.11951902323075	3.58007088101266e-44	1.25376871918685e-41	DKK3	chr11	-	11963106	12009769	5059	protein_coding	dickkopf_WNT_signaling_pathway_inhibitor_3
ENSG00000160180	1981.32281942876	1.38777878078145e-17	-13.9543980708669	4.61413685664224e-44	1.59518992918224e-41	TFF3	chr21	-	42311667	42315651	1168	protein_coding	trefoil_factor_3
ENSG00000134954	9.47560276457628	4027.41616995574	8.71191787732559	5.52130009350735e-44	1.88465035850024e-41	ETS1	chr11	-	128458761	128587558	7149	protein_coding	v-ets_avian_erythroblastosis_virus_E26_oncogene_homolog_1
ENSG00000103067	5415.93925646057	15.8273130116772	-8.40776739869551	6.70554252669542e-44	2.26027074718586e-41	ESRP2	chr16	-	68229111	68238102	5563	protein_coding	epithelial_splicing_regulatory_protein_2
ENSG00000141934	1947.19469583952	1.38777878078145e-17	-13.9293329031002	7.0548544875215e-44	2.34865686556179e-41	PLPP2	chr19	-	281040	291504	7059	protein_coding	phospholipid_phosphatase_2
ENSG00000233276	7.57958445112432	3527.41798039929	8.83793043782302	9.54999674116905e-44	3.14055136734591e-41	GPX1	chr3	-	49357176	49358600	1425	protein_coding	glutathione_peroxidase_1
ENSG00000261780	0.943449169558452	2184.59583834252	10.9918147253046	1.08217503680042e-43	3.51589542679038e-41	CTD-2354A18.1	chr18	+	73324941	73349878	2275	processed_transcript	NA
ENSG00000101335	2.83950028546094	2650.83887589863	9.80240309427275	1.12907046530693e-43	3.6245850199365e-41	MYL9	chr20	+	36541484	36551447	2821	protein_coding	myosin_light_chain_9
ENSG00000155816	2.83950028546094	2616.02887535788	9.78333344757552	1.56590622481609e-43	4.95437764496719e-41	FMN2	chr1	+	240014348	240475189	9691	protein_coding	formin_2
ENSG00000119411	1884.62646925802	1.38777878078145e-17	-13.8822175484591	1.58005072115693e-43	4.95437764496719e-41	BSPRY	chr9	+	113349541	113371233	2339	protein_coding	B-box_and_SPRY_domain_containing
ENSG00000082397	3.7875259485201	2608.64493584923	9.37946273987126	1.67262682816299e-43	5.18437414347624e-41	EPB41L3	chr18	-	5392381	5630700	11000	protein_coding	erythrocyte_membrane_protein_band_4.1-like_3
ENSG00000148798	0.943449169558452	2140.29220128827	10.9622577430712	1.7838615096316e-43	5.46631925780975e-41	INA	chr10	+	103277163	103290351	3231	protein_coding	internexin_neuronal_intermediate_filament_protein_alpha
ENSG00000204381	0.943449169558452	2130.7985647766	10.9558445458052	2.00126643183241e-43	6.06361242705538e-41	LAYN	chr11	+	111540280	111561745	3144	protein_coding	layilin
ENSG00000137642	2350.09615485472	2.11437967028788	-10.0386190502439	2.34079140071979e-43	7.01353121242331e-41	SORL1	chr11	+	121452203	121633693	19449	protein_coding	sortilin-related_receptor_L(DLR_class)_A_repeats_containing
ENSG00000182636	0.943449169558452	2116.03068575843	10.9458114485661	2.3804222415949e-43	7.05389738097231e-41	NDN	chr15	-	23685400	23687330	1931	protein_coding	necdin_MAGE_family_member
ENSG00000160886	3.7875259485201	2568.56069280215	9.35712334969777	2.4461470957212e-43	7.16986984600194e-41	LY6K	chr8	+	142700111	142705127	4049	protein_coding	lymphocyte_antigen_6_complex_locus_K
ENSG00000101194	1.89146593041347	2287.97099146802	10.1449816974699	4.6114180251358e-43	1.33711288672916e-40	SLC17A9	chr20	+	62952647	62969585	5521	protein_coding	solute_carrier_family_17_(vesicular_nucleotide_transporter)_member_9
ENSG00000168453	2023.03497048167	1.05955866386509	-10.7440137007026	7.00379465365534e-43	2.00919496415394e-40	HR	chr8	-	22114415	22133384	8784	protein_coding	hair_growth_associated
ENSG00000102854	16.1116492227514	4860.74648587046	8.22543992750976	9.75182353329195e-43	2.76808077261843e-40	MSLN	chr16	+	643262	768865	2642	protein_coding	mesothelin
ENSG00000118898	2623.12114352916	3.16919693313913	-9.63932956087724	1.02454238656273e-42	2.87789687458861e-40	PPL	chr16	-	4882507	4960741	7686	protein_coding	periplakin
ENSG00000134744	0.943449169558452	1978.90038058785	10.8491555674363	1.23076793592881e-42	3.42153486188208e-40	ZCCHC11	chr1	-	52408282	52553487	16199	protein_coding	zinc_finger_CCHC_domain_containing_11
ENSG00000105357	3499.07631545652	8.44338646668029	-8.67459257695726	1.75024101611565e-42	4.81602033067087e-40	MYH14	chr19	+	50188186	50310545	9905	protein_coding	myosin_heavy_chain_14_non-muscle
ENSG00000163430	18.9556652446005	5268.97285581467	8.10897993543945	1.77565250133941e-42	4.83659043950693e-40	FSTL1	chr3	-	120392293	120451253	8727	protein_coding	follistatin_like_1
ENSG00000196620	1697.86979293548	1.38777878078145e-17	-13.731675638326	2.01270369356735e-42	5.42745678007373e-40	UGT2B15	chr4	-	68537413	68670628	2191	protein_coding	UDP_glucuronosyltransferase_2_family_polypeptide_B15
ENSG00000117020	1.89146593041347	2138.18250428568	10.0473032467487	2.43783848403371e-42	6.50878738222308e-40	AKT3	chr1	-	243488233	243851079	9475	protein_coding	v-akt_murine_thymoma_viral_oncogene_homolog_3
ENSG00000154760	1.38777878078145e-17	1675.10401219531	13.7121942790772	2.8925134257204e-42	7.64701147431141e-40	SLFN13	chr17	-	35435096	35448837	9329	protein_coding	schlafen_family_member_13
ENSG00000137285	3.7875259485201	2316.45190100234	9.20808726165283	3.0941441514508e-42	8.10064962990508e-40	TUBB2B	chr6	-	3224261	3231730	2194	protein_coding	tubulin_beta_2B_class_IIb
ENSG00000162722	2.83950028546094	2310.12280999472	9.60393331176986	3.33279585392329e-42	8.64155509585534e-40	TRIM58	chr1	+	247857199	247878205	3225	protein_coding	tripartite_motif_containing_58
ENSG00000172716	1.38777878078145e-17	1630.80037513588	13.6735266061903	5.54805533424722e-42	1.42484628707915e-39	SLFN11	chr17	-	35350305	35373701	5982	protein_coding	schlafen_family_member_11
ENSG00000177508	1622.97752171424	1.38777878078145e-17	-13.6665978965937	6.07142596481398e-42	1.5445478544073e-39	IRX3	chr16	-	54283304	54286763	2911	protein_coding	iroquois_homeobox_3
ENSG00000144476	10104.7642345581	50.6373120480307	-7.63721595289523	8.4846601860388e-42	2.13829295866096e-39	ACKR3	chr2	+	236567787	236582358	2258	protein_coding	atypical_chemokine_receptor_3
ENSG00000173156	1578.42136035297	1.38777878078145e-17	-13.6264405040071	1.20643348288517e-41	3.01228567587792e-39	RHOD	chr11	+	67056818	67072013	1265	protein_coding	ras_homolog_family_member_D
ENSG00000167861	4332.37133285316	15.8273130116772	-8.08572134997769	1.6484152077239e-41	4.07808848545712e-39	HID1	chr17	-	74950743	74973166	6196	protein_coding	HID1_domain_containing
ENSG00000167641	3.7875259485201	2113.92098875583	9.07609916354443	2.93495190459384e-41	7.19490118720705e-39	PPP1R14A	chr19	-	38251237	38256591	1501	protein_coding	protein_phosphatase_1_regulatory_inhibitor_subunit_14A
ENSG00000133169	1.38777878078145e-17	1520.04128248417	13.5720646680134	3.10674761892777e-41	7.54743750378435e-39	BEX1	chrX	-	103062651	103064240	864	protein_coding	brain_expressed_X-linked_1
ENSG00000162493	0.943449169558452	1708.85916424016	10.6375039320071	4.47267322085395e-41	1.07687594708525e-38	PDPN	chr1	+	13583465	13617957	3707	protein_coding	podoplanin
ENSG00000169715	0.943449169558452	1706.74946723736	10.6357218569159	4.60261426327497e-41	1.09835483383604e-38	MT1E	chr16	+	56625475	56627112	1052	protein_coding	metallothionein_1E
ENSG00000275832	9.47560276457628	3041.13282134939	8.30668611218493	5.59522846497193e-41	1.3235169367231e-38	ARHGAP23	chr17	+	38419280	38512392	8133	protein_coding	Rho_GTPase_activating_protein_23
ENSG00000050555	1.38777878078145e-17	1459.91491789966	13.5138431542865	8.3035822664898e-41	1.94708173389708e-38	LAMC3	chr9	+	131009082	131094473	7594	protein_coding	laminin_subunit_gamma_3
ENSG00000185686	10.4236106947186	3110.7528224288	8.20354169810799	1.10250212763843e-40	2.56293727361189e-38	PRAME	chr22	-	22547701	22559361	3775	protein_coding	preferentially_expressed_antigen_in_melanoma
ENSG00000263639	1624.87352858065	1.05955866386509	-10.4278424446992	1.48784692492692e-40	3.42916924594696e-38	MSMB	chr10	-	46033307	46046269	492	protein_coding	microseminoprotein_beta-
ENSG00000113946	3.7875259485201	1973.62613808122	8.9770322687998	1.57260859024641e-40	3.59381044445634e-38	CLDN16	chr3	+	190322541	190412143	3583	protein_coding	claudin_16
ENSG00000182013	1.38777878078145e-17	1399.78855331339	13.4531728799416	2.3104953268325e-40	5.23569890616514e-38	PNMAL1	chr19	-	46466491	46471563	3696	protein_coding	paraneoplastic_Ma_antigen_family-like_1
ENSG00000017483	3.7875259485201	1937.76128903599	8.95057602533678	2.46758303100881e-40	5.54507033451529e-38	SLC38A5	chrX	-	48458537	48470256	4014	protein_coding	solute_carrier_family_38_member_5
ENSG00000018510	8.5275940924434	2706.74584646387	8.28856515033184	2.61986434625913e-40	5.83861669101022e-38	AGPS	chr2	+	177392644	177543836	8197	protein_coding	alkylglycerone_phosphate_synthase
ENSG00000089327	0.943449169558452	1580.16764706712	10.5245563244388	3.04415235607812e-40	6.72857478967235e-38	FXYD5	chr19	+	35154730	35169883	2993	protein_coding	FXYD_domain_containing_ion_transport_regulator_5
ENSG00000024422	18.9556652446005	4272.14102222572	7.80642513995492	3.10660435038694e-40	6.81078804166945e-38	EHD2	chr19	+	47713343	47743134	3923	protein_coding	EH_domain_containing_2
ENSG00000176697	1.89146593041347	1745.77886178881	9.75480730445299	3.47983187187866e-40	7.56751179492581e-38	BDNF	chr11	-	27654893	27722058	7740	protein_coding	brain-derived_neurotrophic_factor
ENSG00000106541	1560.4092951214	1.05955866386509	-10.3694442491582	4.0265748696094e-40	8.68644943471096e-38	AGR2	chr7	-	16791811	16833433	2845	protein_coding	anterior_gradient_2_protein_disulphide_isomerase_family_member
ENSG00000132698	2207.89563991365	4.22402546552972	-8.98944483007679	4.11533054595485e-40	8.80746059541416e-38	RAB25	chr1	+	156061160	156070514	1699	protein_coding	RAB25_member_RAS_oncogene_family
ENSG00000074410	1552.8252676554	1.05955866386509	-10.3624158339727	4.49307152205044e-40	9.54017060343403e-38	CA12	chr15	-	63321378	63382161	7313	protein_coding	carbonic_anhydrase_XII
ENSG00000134874	0.943449169558452	1549.5770405251	10.4963553461366	4.86045569751938e-40	1.02396131515084e-37	DZIP1	chr13	-	95578202	95644703	8470	protein_coding	DAZ_interacting_zinc_finger_protein_1
ENSG00000143416	2020.19096018262	3.16919693313913	-9.26255799790779	6.18402844382107e-40	1.29270163578356e-37	SELENBP1	chr1	-	151364302	151372733	3504	protein_coding	selenium_binding_protein_1
ENSG00000176046	2155.75545110057	4.22402546552972	-8.9549684173339	7.45680590957934e-40	1.54677098582859e-37	NUPR1	chr16	-	28532708	28539174	5674	protein_coding	nuclear_protein_1_transcriptional_regulator
ENSG00000115339	1488.36103419249	1.05955866386509	-10.3012500585592	1.27314258405792e-39	2.62072999402335e-37	GALNT3	chr2	-	165747591	165794682	4686	protein_coding	polypeptide_N-acetylgalactosaminyltransferase_3
ENSG00000129514	10702.9544005789	70.679434992047	-7.24006811598304	1.79754432737159e-39	3.67216517665927e-37	FOXA1	chr14	-	37589984	37596059	3982	protein_coding	forkhead_box_A1
ENSG00000189334	3550.26850082671	15.8273130116772	-7.79850205984315	2.19335485938253e-39	4.44706820587288e-37	S100A14	chr1	-	153614255	153616986	1277	protein_coding	S100_calcium_binding_protein_A14
ENSG00000070882	1.89146593041347	1611.81310211021	9.63962920365237	2.44571685973834e-39	4.92173140594807e-37	OSBPL3	chr7	-	24796539	24981634	8100	protein_coding	oxysterol_binding_protein_like_3
ENSG00000137440	0.943449169558452	1439.87279637111	10.3904307549528	2.92495562946403e-39	5.84254470400941e-37	FGFBP1	chr4	-	15935569	15938740	1359	protein_coding	fibroblast_growth_factor_binding_protein_1
ENSG00000064270	2033.46300824479	4.22402546552972	-8.8707188342758	3.09880894851113e-39	6.14430015481994e-37	ATP2C2	chr16	+	84368527	84464187	7352	protein_coding	ATPase_Ca++_transporting_type_2C_member_2
ENSG00000163395	2.83950028546094	1745.77886178881	9.19985885662504	3.16095371607413e-39	6.22177211004781e-37	IGFN1	chr1	+	201190825	201228952	12116	protein_coding	immunoglobulin-like_and_fibronectin_type_III_domain_containing_1
ENSG00000183665	1254.20418613727	1.38777878078145e-17	-13.2947608779377	3.24366106774232e-39	6.33830176469126e-37	TRMT12	chr8	+	124450820	124462150	2331	protein_coding	tRNA_methyltransferase_12_homolog_(S._cerevisiae)
ENSG00000118513	3486.75227083033	15.8273130116772	-7.77245874486572	3.42632778201394e-39	6.64707589710705e-37	MYB	chr6	+	135181315	135219173	5493	protein_coding	v-myb_avian_myeloblastosis_viral_oncogene_homolog
ENSG00000113657	2.83950028546094	1738.39492227911	9.19374432022788	3.48668068448687e-39	6.71584509556236e-37	DPYSL3	chr5	-	147390811	147510056	7164	protein_coding	dihydropyrimidinase_like_3
ENSG00000165025	1249.46416896945	1.38777878078145e-17	-13.2892987313042	3.57384698110531e-39	6.80996743023304e-37	SYK	chr9	+	90801787	90898549	5210	protein_coding	spleen_tyrosine_kinase
ENSG00000177469	98.5879894119811	13779.4905629044	7.12501825620954	3.58605419822403e-39	6.80996743023304e-37	PTRF	chr17	-	42402452	42423517	3828	protein_coding	polymerase_I_and_transcript_release_factor
ENSG00000154734	4.73554534719345	1870.25098495008	8.58671680520504	4.12481528911288e-39	7.77830553050475e-37	ADAMTS1	chr21	-	26835747	26845409	7063	protein_coding	ADAM_metallopeptidase_with_thrombospondin_type_1_motif_1
ENSG00000120262	2378.53625784235	7.38854262067175	-8.30736168058194	6.14074398159293e-39	1.14993959866413e-36	CCDC170	chr6	+	151494030	151621193	5419	protein_coding	coiled-coil_domain_containing_170
ENSG00000151388	2.83950028546094	1697.25583072478	9.1591949144715	6.24171453852949e-39	1.16078671893784e-36	ADAMTS12	chr5	-	33523535	33892192	9778	protein_coding	ADAM_metallopeptidase_with_thrombospondin_type_1_motif_12
ENSG00000072858	1385.9766633906	1.05955866386509	-10.1984377477944	7.16165589760849e-39	1.32274803380076e-36	SIDT1	chr3	+	113532296	113629578	8060	protein_coding	SID1_transmembrane_family_member_1
ENSG00000105388	1201.11599385565	1.38777878078145e-17	-13.2323706862609	9.24337193491737e-39	1.69562426936722e-36	CEACAM5	chr19	+	41708585	41729798	3351	protein_coding	carcinoembryonic_antigen-related_cell_adhesion_molecule_5
ENSG00000120645	1.38777878078145e-17	1201.47703501316	13.2327934885723	9.43185831205676e-39	1.71851007596569e-36	IQSEC3	chr12	+	66765	178460	7686	protein_coding	IQ_motif_and_Sec7_domain_3
ENSG00000174197	1181.20792174884	1.38777878078145e-17	-13.2082607567349	1.38843812826271e-38	2.51279346085452e-36	MGA	chr15	+	41621224	41773081	17651	protein_coding	MGA_MAX_dimerization_protein
ENSG00000181885	1173.6238942794	1.38777878078145e-17	-13.1989689879815	1.63688478430631e-38	2.9426823395736e-36	CLDN7	chr17	-	7259903	7263983	2492	protein_coding	claudin_7
ENSG00000157168	0.943449169558452	1338.60734022356	10.2852313334738	1.71662250968913e-38	3.06559222491901e-36	NRG1	chr8	+	31639386	32767959	11328	protein_coding	neuregulin_1
ENSG00000064787	1167.93587367724	1.38777878078145e-17	-13.1919606766493	1.81526734314473e-38	3.22042757731847e-36	BCAS1	chr20	-	53936777	54070594	8186	protein_coding	breast_carcinoma_amplified_sequence_1
ENSG00000136717	12.3196249236669	2742.61069550559	7.78345488088209	2.35868615858443e-38	4.15714581388156e-36	BIN1	chr2	-	127048027	127107355	6929	protein_coding	bridging_integrator_1
ENSG00000132746	1461.81693805965	2.11437967028788	-9.35371010315438	2.55588806823724e-38	4.47545958753802e-36	ALDH3B2	chr11	-	67662162	67681200	3235	protein_coding	aldehyde_dehydrogenase_3_family_member_B2
ENSG00000072041	1.89146593041347	1463.07946340415	9.49996380483416	2.59874587466539e-38	4.5211471778211e-36	SLC6A15	chr12	-	84859488	84913615	8781	protein_coding	solute_carrier_family_6_(neutral_amino_acid_transporter)_member_15
ENSG00000151892	5481.35149331788	35.8694319418408	-7.25083892383227	3.58285908888004e-38	6.19329347376533e-36	GFRA1	chr10	-	116056925	116273467	9678	protein_coding	GDNF_family_receptor_alpha_1
ENSG00000166825	3.7875259485201	1561.18037404108	8.63884398988968	4.85051583275472e-38	8.33114713032254e-36	ANPEP	chr15	-	89784889	89815401	4871	protein_coding	alanyl_(membrane)_aminopeptidase
ENSG00000078114	2517.89276247925	10.5530773088976	-7.88213979260317	6.1960984537576e-38	1.05749361331663e-35	NEBL	chr10	-	20779973	21174187	13654	protein_coding	nebulette
ENSG00000138685	2.83950028546094	1541.13825251344	9.01999751380554	6.63922581016617e-38	1.12599599494931e-35	FGF2	chr4	+	122826708	122898236	6775	protein_coding	fibroblast_growth_factor_2_(basic)
ENSG00000068366	11.3716180425464	2489.44705520878	7.75800904986229	8.30299342720432e-38	1.39936575473745e-35	ACSL4	chrX	-	109624244	109733403	6415	protein_coding	acyl-CoA_synthetase_long-chain_family_member_4
ENSG00000147676	5026.30984561307	33.7597348255035	-7.21296010577869	1.05024315331504e-37	1.75905943306169e-35	MAL2	chr8	+	119165034	119245673	3430	protein_coding	mal_T-cell_differentiation_protein_2_(gene/pseudogene)
ENSG00000075461	1080.71955776959	1.38777878078145e-17	-13.080004686708	1.20672958460095e-37	2.005626288677e-35	CACNG4	chr17	+	66964910	67033398	3380	protein_coding	calcium_channel_voltage-dependent_gamma_subunit_4
ENSG00000115355	17.0596547238187	3126.57554994681	7.50701918201017	1.21233065732534e-37	2.005626288677e-35	CCDC88A	chr2	-	55287842	55419921	14537	protein_coding	coiled-coil_domain_containing_88A
ENSG00000125354	6.63157350604578	1841.77007541353	8.08976763463308	1.77889391530324e-37	2.9249788609797e-35	SEPT6	chrX	-	119615724	119693370	6245	protein_coding	septin_6
ENSG00000114209	1053.22745818654	1.38777878078145e-17	-13.0428340279915	2.22355359531295e-37	3.63396037886115e-35	PDCD10	chr3	-	167683298	167734939	3275	protein_coding	programmed_cell_death_10
ENSG00000106366	3.7875259485201	1465.18916040714	8.54730096979384	2.27177954993864e-37	3.6904100809425e-35	SERPINE1	chr7	+	101127089	101139266	3190	protein_coding	serpin_peptidase_inhibitor_clade_E_(nexin_plasminogen_activator_inhibitor_type_1)_member_1
ENSG00000122786	6.63157350604578	1777.4243168302	8.03846620648666	4.20957049223935e-37	6.79732202956445e-35	CALD1	chr7	+	134744252	134970728	9843	protein_coding	caldesmon_1
ENSG00000178372	1169.83188054463	1.05955866386509	-9.95386083508898	4.3498722803348e-37	6.98206285187549e-35	CALML5	chr10	-	5498697	5499555	859	protein_coding	calmodulin_like_5
ENSG00000198125	1300.65635438023	2.11437967028788	-9.18520308195341	4.41601244836325e-37	7.04628353151263e-35	MB	chr22	-	35606764	35637951	2168	protein_coding	myoglobin
ENSG00000164120	1290.22831661167	2.11437967028788	-9.17359078619264	5.32408259224182e-37	8.44524771661135e-35	HPGD	chr4	-	174490177	174523154	5529	protein_coding	hydroxyprostaglandin_dehydrogenase_15-(NAD)
ENSG00000185222	1.38777878078145e-17	1006.33006218394	12.9771159748866	6.84827180773582e-37	1.07994443021874e-34	WBP5	chrX	+	103356445	103358469	1096	protein_coding	WW_domain_binding_protein_5
ENSG00000143217	1272.2162513747	2.11437967028788	-9.15331036675007	7.48134190957872e-37	1.17291782519593e-34	PVRL4	chr1	-	161070995	161089599	3502	protein_coding	poliovirus_receptor-related_4
ENSG00000150540	1135.70375693057	1.05955866386509	-9.91115097402172	9.06119811206249e-37	1.41239461439235e-34	HNMT	chr2	+	137964020	138016364	4756	protein_coding	histamine_N-methyltransferase
ENSG00000070731	2125.41934124532	9.49823147579758	-7.78781377312347	1.21082177819532e-36	1.87649540636867e-34	ST6GALNAC2	chr17	-	76563710	76586956	7558	protein_coding	ST6_(alpha-N-acetyl-neuraminyl-23-beta-galactosyl-13)-N-acetylgalactosaminide_alpha-26-sialyltransferase_2
ENSG00000272620	2.83950028546094	1367.08824976565	8.84712192922758	1.22040347875131e-36	1.8805371547433e-34	AFAP1-AS1	chr4	+	7754090	7778928	6795	antisense	AFAP1_antisense_RNA_1
ENSG00000008517	11.3716180425464	2193.03462635282	7.57512172516932	1.84141891578301e-36	2.82134673198891e-34	IL32	chr16	+	3065297	3082192	3209	protein_coding	interleukin_32
ENSG00000149948	1.38777878078145e-17	962.026425102479	12.912168773034	2.06276188809861e-36	3.14262356352921e-34	HMGA2	chr12	+	65824131	65966295	15403	protein_coding	high_mobility_group_AT-hook_2
ENSG00000135549	7338.49021798113	64.3503435704753	-6.83072389044573	3.00898827207932e-36	4.55844818791522e-34	PKIB	chr6	+	122471917	122726373	3432	protein_coding	protein_kinase_(cAMP-dependent_catalytic)_inhibitor_beta
ENSG00000075340	6.63157350604578	1633.96492064015	7.91706365390818	3.28291056254055e-36	4.94564057147868e-34	ADD2	chr2	-	70607618	70768225	12673	protein_coding	adducin_2
ENSG00000134802	0.943449169558452	1069.62097229548	9.96163074419274	3.93263229256227e-36	5.89152013340189e-34	SLC43A3	chr11	-	57406954	57427580	4517	protein_coding	solute_carrier_family_43_member_3
ENSG00000117525	20.8516752476805	3084.38160989875	7.19981730107219	4.32682523788476e-36	6.44625245109394e-34	F3	chr1	-	94529225	94541800	2875	protein_coding	coagulation_factor_III_(thromboplastin_tissue_factor)
ENSG00000160179	1061.75948909182	1.05955866386509	-9.81403283962928	4.60786137687132e-36	6.82723021366549e-34	ABCG1	chr21	+	42199689	42297244	6121	protein_coding	ATP_binding_cassette_subfamily_G_member_1
ENSG00000107485	24500.196359685	252.11338183344	-6.60189655977693	5.2424230022279e-36	7.724982441425e-34	GATA3	chr10	+	8053604	8075198	3253	protein_coding	GATA_binding_protein_3
ENSG00000102038	2.83950028546094	1275.31643012816	8.74687993371824	6.4785239594334e-36	9.4945585375044e-34	SMARCA1	chrX	-	129446501	129523500	4363	protein_coding	SWI/SNF_related_matrix_associated_actin_dependent_regulator_of_chromatin_subfamily_a_member_1
ENSG00000176165	1.38777878078145e-17	912.448545507472	12.8358452510115	7.26252009420642e-36	1.0529092304321e-33	FOXG1	chr14	+	28765388	28770277	4890	protein_coding	forkhead_box_G1
ENSG00000107562	911.026943067902	1.38777878078145e-17	-12.8336102315722	7.26252009420642e-36	1.0529092304321e-33	CXCL12	chr10	-	44370165	44386493	6077	protein_coding	chemokine_(C-X-C_motif)_ligand_12
ENSG00000109113	4.73554534719345	1369.19794676875	8.13684988545832	8.25073160611336e-36	1.18978197053718e-33	RAB34	chr17	-	28714281	28718429	3328	protein_coding	RAB34_member_RAS_oncogene_family
ENSG00000091129	4894.53736846435	41.1436748049736	-6.89018611181647	1.03049632068919e-35	1.47810445658004e-33	NRCAM	chr7	-	108147623	108456717	8193	protein_coding	neuronal_cell_adhesion_molecule
ENSG00000178773	11.3716180425464	2013.71038113148	7.45205638175051	1.46224532650549e-35	2.08629140076968e-33	CPNE7	chr16	+	89575768	89597246	3048	protein_coding	copine_VII
ENSG00000131016	91.0039609679889	9164.5283704969	6.65195979504309	1.58423725380651e-35	2.24844956769191e-33	AKAP12	chr6	+	151239999	151358557	8741	protein_coding	A-kinase_anchoring_protein_12
ENSG00000152661	10.4236106947186	1889.23825797435	7.48411864052668	2.14361644015942e-35	3.02642727357795e-33	GJA1	chr6	+	121435692	121449727	3037	protein_coding	gap_junction_protein_alpha_1
ENSG00000196730	7.57958445112432	1602.31946559732	7.6995387926274	2.32028474594226e-35	3.25879158641036e-33	DAPK1	chr9	+	87497228	87708633	8907	protein_coding	death-associated_protein_kinase_1
ENSG00000162670	1103.47164018182	2.11437967028788	-8.94803839680575	2.33812213321665e-35	3.26682909037928e-33	BRINP3	chr1	-	190097662	190478404	4287	protein_coding	bone_morphogenetic_protein/retinoic_acid_inducible_neural-specific_3
ENSG00000153976	3.7875259485201	1194.09309550141	8.25215622958642	3.22836008499024e-35	4.48742051813643e-33	HS3ST3A1	chr17	-	13495689	13601927	2628	protein_coding	heparan_sulfate-glucosamine_3-sulfotransferase_3A1
ENSG00000166250	13.2676314239607	2113.92098875583	7.3019637149003	3.87779669715608e-35	5.36249567874415e-33	CLMP	chr11	-	123069865	123195281	5097	protein_coding	CXADR-like_membrane_protein
ENSG00000101017	1.38777878078145e-17	845.993089872582	12.7267628560934	4.5297837034847e-35	6.23215037490655e-33	CD40	chr20	+	46118272	46129863	2527	protein_coding	CD40_molecule_TNF_receptor_superfamily_member_5
ENSG00000179388	1365.12058785554	4.22402546552972	-8.29585335149639	4.955271670063e-35	6.78293684542735e-33	EGR3	chr8	-	22687659	22693302	4855	protein_coding	early_growth_response_3
ENSG00000186493	838.978682046642	1.38777878078145e-17	-12.7147682280678	5.22163377899164e-35	7.11144325678226e-33	C5orf38	chr5	+	2752131	2755397	1925	protein_coding	chromosome_5_open_reading_frame_38
ENSG00000166206	1.38777878078145e-17	823.841271325389	12.6884888905278	8.5182350133872e-35	1.15428505211557e-32	GABRB3	chr15	-	26543546	26939539	12730	protein_coding	gamma-aminobutyric_acid_(GABA)_A_receptor_beta_3
ENSG00000215845	817.174603048631	1.38777878078145e-17	-12.6767843684012	9.85513342622853e-35	1.32876763985839e-32	TSTD1	chr1	-	161037631	161038990	1210	protein_coding	thiosulfate_sulfurtransferase_(rhodanese)-like_domain_containing_1
ENSG00000130303	37.9157534079081	4128.68162606762	6.76187405421653	1.00002322276292e-34	1.34162319527486e-32	BST2	chr19	-	17402939	17405648	1119	protein_coding	bone_marrow_stromal_cell_antigen_2
ENSG00000163435	2114.04330004952	13.7176178423347	-7.25532919771562	1.03241023808413e-34	1.37821655842459e-32	ELF3	chr1	+	202007945	202017188	7191	protein_coding	E74-like_factor_3_(ets_domain_transcription_factor_epithelial-specific_)
ENSG00000106624	18.9556652446005	2537.97008626612	7.05516867561684	1.0516866200637e-34	1.39703356633684e-32	AEBP1	chr7	+	44104361	44114562	4955	protein_coding	AE_binding_protein_1
ENSG00000164236	2.83950028546094	1126.5827913917	8.56799597641222	1.30063145020122e-34	1.71925625912383e-32	ANKRD33B	chr5	+	10564330	10657816	9783	protein_coding	ankyrin_repeat_domain_33B
ENSG00000131435	1.38777878078145e-17	801.689452776935	12.6491717996965	1.6282861896583e-34	2.14187148245492e-32	PDLIM4	chr5	+	132257671	132273454	3192	protein_coding	PDZ_and_LIM_domain_4
ENSG00000104518	13.2676314239607	1991.55856260374	7.21594520475053	1.64143688033714e-34	2.1451650088415e-32	GSDMD	chr8	+	143553207	143563062	5116	protein_coding	gasdermin_D
ENSG00000180914	49.2918001659197	4936.69557795326	6.64231279116023	1.64670012916336e-34	2.1451650088415e-32	OXTR	chr3	-	8750408	8769628	4514	protein_coding	oxytocin_receptor
ENSG00000105784	4.73554534719345	1179.32521647778	7.92150086361671	2.99041017030419e-34	3.87689426213571e-32	RUNDC3B	chr7	+	87627548	87832296	4710	protein_coding	RUN_domain_containing_3B
ENSG00000168350	1259.89220673862	4.22402546552972	-8.18013666110254	3.41636220901352e-34	4.4079245611607e-32	DEGS2	chr14	-	100143957	100160163	4466	protein_coding	delta(4)-desaturase_sphingolipid_2
ENSG00000156049	1171.72788741202	3.16919693313913	-8.47677068972361	3.45152248110451e-34	4.43208358216496e-32	GNA14	chr9	-	77423079	77648307	2721	protein_coding	guanine_nucleotide_binding_protein_(G_protein)_alpha_14
ENSG00000154640	4.73554534719345	1165.61218595565	7.90462884131004	3.98703384575751e-34	5.09546704666811e-32	BTG3	chr21	-	17593653	17612947	2306	protein_coding	BTG_family_member_3
ENSG00000115919	1416.31277325893	6.33370047263656	-7.77788162865986	4.51301429482893e-34	5.74046903180929e-32	KYNU	chr2	+	142877498	143055832	17600	protein_coding	kynureninase
ENSG00000166396	1.38777878078145e-17	759.495512680768	12.5711817649782	5.88908818295571e-34	7.45564093622458e-32	SERPINB7	chr18	+	63752935	63805376	2637	protein_coding	serpin_peptidase_inhibitor_clade_B_(ovalbumin)_member_7
ENSG00000143546	757.450386649267	1.38777878078145e-17	-12.5673093751813	6.07711781842684e-34	7.65773640615413e-32	S100A8	chr1	-	153390032	153391188	1006	protein_coding	S100_calcium_binding_protein_A8
ENSG00000112246	10.4236106947186	1641.34886015009	7.28120975838665	6.48096239207891e-34	8.12863404022325e-32	SIM1	chr6	-	100385015	100464929	9274	protein_coding	single-minded_family_bHLH_transcription_factor_1
ENSG00000118523	2.83950028546094	1051.68854776441	8.46876112110034	6.82610618928891e-34	8.5218879398317e-32	CTGF	chr6	-	131948176	131951373	2339	protein_coding	connective_tissue_growth_factor
ENSG00000244509	0.943449169558452	862.870665907748	9.65178617528118	6.92213059783347e-34	8.60194348853351e-32	APOBEC3C	chr22	+	39014083	39020352	2818	protein_coding	apolipoprotein_B_mRNA_editing_enzyme_catalytic_polypeptide-like_3C
ENSG00000164938	6454.95101870785	72.7891321250388	-6.46818700136337	7.60149664854432e-34	9.40284213874524e-32	TP53INP1	chr8	-	94925972	94949411	5676	protein_coding	tumor_protein_p53_inducible_nuclear_protein_1
ENSG00000137962	83.4199323683465	7158.20652135166	6.4208538852593	9.19749001797994e-34	1.13250920467967e-31	ARHGAP29	chr1	-	94148988	94275068	15524	protein_coding	Rho_GTPase_activating_protein_29
ENSG00000157110	1535.76120585673	8.44338646668029	-7.48664044120388	9.42067211493641e-34	1.15471747386989e-31	RBPMS	chr8	+	30384479	30572261	8931	protein_coding	RNA_binding_protein_with_multiple_splicing
ENSG00000188848	1.38777878078145e-17	741.563088138196	12.5367152804906	1.0432915342527e-33	1.27300450283522e-31	BEND4	chr4	-	42110938	42152878	8765	protein_coding	BEN_domain_containing_4
ENSG00000233237	1.38777878078145e-17	736.288845625465	12.5264193668757	1.22578503206937e-33	1.48894230517038e-31	LINC00472	chr6	-	71344344	71420769	3443	lincRNA	long_intergenic_non-protein_coding_RNA_472
ENSG00000128340	1.38777878078145e-17	734.179148620345	12.5222803392103	1.3509436105417e-33	1.63361190142904e-31	RAC2	chr22	-	37225261	37244448	2532	protein_coding	ras-related_C3_botulinum_toxin_substrate_2_(rho_family_small_GTP_binding_protein_Rac2)
ENSG00000212719	0.943449169558452	837.554301854746	9.60883064686649	1.3988940433829e-33	1.68404360597603e-31	C17orf51	chr17	-	21524790	21574458	8760	protein_coding	chromosome_17_open_reading_frame_51
ENSG00000147889	87.211946689867	7249.97834095008	6.37519547392244	1.83238590542689e-33	2.19609414781074e-31	CDKN2A	chr9	-	21967753	21995301	4329	protein_coding	cyclin-dependent_kinase_inhibitor_2A
ENSG00000238266	1.38777878078145e-17	723.630663594504	12.5014051844673	1.87317415848074e-33	2.23504488307927e-31	LINC00707	chr10	+	6779598	6842906	3070	lincRNA	long_intergenic_non-protein_coding_RNA_707
ENSG00000112319	1.38777878078145e-17	721.520966589287	12.4971936607095	2.00073885751699e-33	2.37673674148913e-31	EYA4	chr6	+	133240598	133532120	8968	protein_coding	EYA_transcriptional_coactivator_and_phosphatase_4
ENSG00000135046	43.603777082189	3978.89313890204	6.50754528060328	2.51157570335642e-33	2.97048905336444e-31	ANXA1	chr9	+	73151757	73170393	4561	protein_coding	annexin_A1
ENSG00000116962	2.83950028546094	989.452486153261	8.38076630824451	2.93557613075393e-33	3.45680113283452e-31	NID1	chr1	-	235975830	236065162	5864	protein_coding	nidogen_1
ENSG00000130222	707.206204580882	1.38777878078145e-17	-12.4683063902649	3.08340823525582e-33	3.61509506399602e-31	GADD45G	chr9	+	89605013	89606555	1322	protein_coding	growth_arrest_and_DNA_damage_inducible_gamma
ENSG00000147027	1.38777878078145e-17	705.698239049612	12.4652091415757	3.41070640280408e-33	3.97637237472912e-31	TMEM47	chrX	-	34627064	34657288	4054	protein_coding	transmembrane_protein_47
ENSG00000170075	896.806891552285	2.11437967028788	-8.64889702944833	3.42104276102186e-33	3.97637237472912e-31	GPR37L1	chr1	+	202122858	202133592	6588	protein_coding	G_protein-coupled_receptor_37_like_1
ENSG00000175352	0.943449169558452	804.853998283938	9.55138343082042	3.65373895848158e-33	4.22861479632679e-31	NRIP3	chr11	-	8980576	9004049	4123	protein_coding	nuclear_receptor_interacting_protein_3
ENSG00000175175	1371.75661188948	7.38854262067175	-7.51336969397243	3.91856778853227e-33	4.51573072587868e-31	PPM1E	chr17	+	58755869	58985176	6542	protein_coding	protein_phosphatase_Mg2+/Mn2+_dependent_1E
ENSG00000158825	2.83950028546094	976.79430412997	8.36219293722879	4.03040437758328e-33	4.6248461466345e-31	CDA	chr1	+	20588948	20618908	963	protein_coding	cytidine_deaminase
ENSG00000235750	691.090146177453	1.38777878078145e-17	-12.4350555112514	5.30606069479067e-33	6.0628488430392e-31	KIAA0040	chr1	-	175156987	175192999	4783	protein_coding	KIAA0040
ENSG00000138623	5.68356074469745	1123.41824588645	7.59458997045222	5.55021662145999e-33	6.31506925798692e-31	SEMA7A	chr15	-	74409289	74434467	4309	protein_coding	semaphorin_7A_GPI_membrane_anchor_(John_Milton_Hagen_blood_group)
ENSG00000156510	1.89146593041347	878.693393440134	8.76446626709627	5.70645080717147e-33	6.46555262462966e-31	HKDC1	chr10	+	69220303	69267559	4259	protein_coding	hexokinase_domain_containing_1
ENSG00000092445	686.350128999552	1.38777878078145e-17	-12.4251281932141	6.30236613556277e-33	7.09163614157662e-31	TYRO3	chr15	+	41557675	41583586	10945	protein_coding	TYRO3_protein_tyrosine_kinase
ENSG00000137747	1116.7436882551	4.22402546552972	-8.00615341528638	6.31162454193572e-33	7.09163614157662e-31	TMPRSS13	chr11	-	117900643	117929459	5367	protein_coding	transmembrane_protease_serine_13
ENSG00000157227	27.4877075203187	2707.8006949651	6.61548928824754	6.40634722643868e-33	7.16819748166578e-31	MMP14	chr14	+	22836557	22849027	4464	protein_coding	matrix_metallopeptidase_14
ENSG00000204516	12.3196249236669	1636.07461764299	7.03818634978276	6.74579039348512e-33	7.51681751036032e-31	MICB	chr6	+	31494881	31511124	2798	protein_coding	MHC_class_I_polypeptide-related_sequence_B
ENSG00000161671	682.558115257089	1.38777878078145e-17	-12.4171368598162	7.23871329079993e-33	8.03288652673708e-31	EMC10	chr19	+	50476400	50490870	10748	protein_coding	ER_membrane_protein_complex_subunit_10
ENSG00000129993	2687.58537696422	26.3757952266003	-6.66445965744858	7.59662908868206e-33	8.39552049202461e-31	CBFA2T3	chr16	-	88874858	88977204	5972	protein_coding	core-binding_factor_runt_domain_alpha_subunit_2;_translocated_to_3
ENSG00000101938	1.38777878078145e-17	680.381874984014	12.4125115846668	8.03525126480593e-33	8.8440239023166e-31	CHRDL1	chrX	-	110673856	110795819	3920	protein_coding	chordin-like_1
ENSG00000140030	0.943449169558452	777.427937222295	9.501372885105	8.24532064323432e-33	9.03834619778279e-31	GPR65	chr14	+	88005124	88014811	4522	protein_coding	G_protein-coupled_receptor_65
ENSG00000160321	1.38777878078145e-17	679.327026481221	12.4102735233842	8.32059399438002e-33	9.08393269847982e-31	ZNF208	chr19	-	21932958	22010949	6867	protein_coding	zinc_finger_protein_208
ENSG00000112852	664.54604997859	1.38777878078145e-17	-12.3785615470419	1.36324612420911e-32	1.48231028167028e-30	PCDHB2	chr5	+	141094578	141098703	4126	protein_coding	protocadherin_beta_2
ENSG00000168702	1898.84652075396	16.8821608614159	-6.80333939325873	2.17123959755052e-32	2.35139144528303e-30	LRP1B	chr2	-	140231423	142131701	17042	protein_coding	LDL_receptor_related_protein_1B
ENSG00000115295	2.83950028546094	907.174302997101	8.2555315501715	2.38861609223721e-32	2.57645686173074e-30	CLIP4	chr2	+	29097705	29189643	7775	protein_coding	CAP-Gly_domain_containing_linker_protein_family_member_4
ENSG00000153707	0.943449169558452	738.398542630569	9.42707542950028	2.80537140893782e-32	3.01393009615208e-30	PTPRD	chr9	-	8314246	10612723	11045	protein_coding	protein_tyrosine_phosphatase_receptor_type_D
ENSG00000056998	642.741970953007	1.38777878078145e-17	-12.3304415669603	3.02215635577373e-32	3.23394715435692e-30	GYG2	chrX	+	2828788	2882818	3646	protein_coding	glycogenin_2
ENSG00000091986	28.4357118817862	2603.37069334304	6.51005882508066	3.07112424640269e-32	3.27335717108676e-30	CCDC80	chr3	-	112596794	112649530	13071	protein_coding	coiled-coil_domain_containing_80
ENSG00000129682	5.68356074469745	1044.3046082515	7.48924911263498	3.18758792478993e-32	3.38411401495611e-30	FGF13	chrX	-	138614731	139222777	20627	protein_coding	fibroblast_growth_factor_13
ENSG00000086548	638.949957208921	1.38777878078145e-17	-12.3219065474291	3.37542492987603e-32	3.56947877094263e-30	CEACAM6	chr19	+	41750977	41772208	3052	protein_coding	carcinoembryonic_antigen-related_cell_adhesion_molecule_6_(non-specific_cross_reacting_antigen)
ENSG00000122861	4.73554534719345	964.136122106428	7.63088082325012	3.8375924008295e-32	4.04236393284251e-30	PLAU	chr10	+	73909177	73917497	2950	protein_coding	plasminogen_activator_urokinase
ENSG00000167083	1.38777878078145e-17	632.913692353063	12.3081947718355	4.54367278715943e-32	4.76749729099382e-30	GNGT2	chr17	-	49202791	49210574	1689	protein_coding	guanine_nucleotide_binding_protein_(G_protein)_gamma_transducing_activity_polypeptide_2
ENSG00000164741	21.7996800907342	2101.26280674021	6.58236183924754	4.77219320923855e-32	4.98786674729949e-30	DLC1	chr8	-	13083361	13604610	12794	protein_coding	DLC1_Rho_GTPase_activating_protein
ENSG00000159217	46.4477886864017	3681.42586157149	6.304550537102	5.96592270200943e-32	6.21146994526588e-30	IGF2BP1	chr17	+	48997412	49055650	9109	protein_coding	insulin_like_growth_factor_2_mRNA_binding_protein_1
ENSG00000121068	3860.26562334272	48.5276148813543	-6.31022845121979	6.37754842020713e-32	6.61449887305021e-30	TBX2	chr17	+	61399896	61409466	6029	protein_coding	T-box_2
ENSG00000132688	27.4877075203187	2453.58220616625	6.47326397941185	6.92335750111191e-32	7.15307503352428e-30	NES	chr1	-	156668763	156677397	5558	protein_coding	nestin
ENSG00000185760	0.943449169558452	710.972481562945	9.37247850509293	7.02284215743266e-32	7.20068295122925e-30	KCNQ5	chr6	+	72621792	73198851	7570	protein_coding	potassium_channel_voltage_gated_KQT-like_subfamily_Q_member_5
ENSG00000172985	0.943449169558452	710.972481562945	9.37247850509293	7.02284215743266e-32	7.20068295122925e-30	SH3RF3	chr2	+	109129348	109504632	5803	protein_coding	SH3_domain_containing_ring_finger_3
ENSG00000140832	1005.8272864871	4.22402546552972	-7.85525631228916	7.55312116668859e-32	7.7150555068532e-30	MARVELD3	chr16	+	71626161	71642114	6446	protein_coding	MARVEL_domain_containing_3
ENSG00000171517	1.38777878078145e-17	619.200661813044	12.2765990744855	7.71000658677512e-32	7.84558632524445e-30	LPAR3	chr1	-	84811602	84893213	3543	protein_coding	lysophosphatidic_acid_receptor_3
ENSG00000072840	1.38777878078145e-17	617.090964806792	12.2716761899322	8.32265236364143e-32	8.43716705405845e-30	EVC	chr4	+	5711197	5814305	7148	protein_coding	Ellis_van_Creveld_protein
ENSG00000138696	1593.58941528463	13.7176178423347	-6.84763303013324	9.5500347229022e-32	9.64517739092812e-30	BMPR1B	chr4	+	94757968	95158448	6312	protein_coding	bone_morphogenetic_protein_receptor_type_IB
ENSG00000240280	1.38777878078145e-17	611.816722291047	12.2592949806823	1.00861726455577e-31	1.01486467000041e-29	TCAM1P	chr17	+	63849292	63864379	3546	unitary_pseudogene	testicular_cell_adhesion_molecule_1_pseudogene
ENSG00000123364	917.662967108256	3.16919693313913	-8.12421344365947	1.20222666681931e-31	1.2034762131075e-29	HOXC13	chr12	+	53938765	53946544	2423	protein_coding	homeobox_C13
ENSG00000112837	0.943449169558452	695.149754022607	9.34001414319096	1.20499361247135e-31	1.2034762131075e-29	TBX18	chr6	-	84687351	84764519	8469	protein_coding	T-box_18
ENSG00000104133	1449.49289342633	11.6079237420807	-6.94955687608243	1.21176066323825e-31	1.20576893154548e-29	SPG11	chr15	-	44562696	44663678	11853	protein_coding	spastic_paraplegia_11_(autosomal_recessive)
ENSG00000196208	16636.5078856882	258.442472901264	-6.00770583055566	1.22807947565191e-31	1.21751438016285e-29	GREB1	chr2	+	11482341	11642788	12361	protein_coding	growth_regulation_by_estrogen_in_breast_cancer_1
ENSG00000099810	8.5275940924434	1186.70915598962	7.09905419272032	1.2943312986235e-31	1.27849589006158e-29	MTAP	chr9	+	21802543	21937651	14617	protein_coding	methylthioadenosine_phosphorylase
ENSG00000134240	602.925826631881	1.38777878078145e-17	-12.2382015573802	1.3233221233591e-31	1.30236147366794e-29	HMGCS2	chr1	-	119747996	119768905	2571	protein_coding	3-hydroxy-3-methylglutaryl-CoA_synthase_2_(mitochondrial)
ENSG00000087258	3.7875259485201	833.334907845764	7.73327210874191	1.76729847506218e-31	1.73298075194643e-29	GNAO1	chr16	+	56191390	56357444	9813	protein_coding	guanine_nucleotide_binding_protein_(G_protein)_alpha_activating_activity_polypeptide_O
ENSG00000162409	1.89146593041347	759.495512680768	8.55417883761529	1.82883593923097e-31	1.78682572236603e-29	PRKAA2	chr1	+	56645322	56715335	9354	protein_coding	protein_kinase_AMP-activated_alpha_2_catalytic_subunit
ENSG00000173905	594.393795703388	1.38777878078145e-17	-12.2176445212031	1.88455607957332e-31	1.83461874519041e-29	GOLIM4	chr3	-	168008677	168095975	4647	protein_coding	golgi_integral_membrane_protein_4
ENSG00000142156	102.380003585319	6854.41015302558	6.0632326299578	2.15541990818377e-31	2.09075731093825e-29	COL6A1	chr21	+	45981737	46005050	5343	protein_coding	collagen_type_VI_alpha_1
ENSG00000163565	0.943449169558452	677.21732947562	9.30231583374111	2.16664217126932e-31	2.09411013585837e-29	IFI16	chr1	+	158999968	159055155	5294	protein_coding	interferon_gamma-inducible_protein_16
ENSG00000120675	581.121747590432	1.38777878078145e-17	-12.1850730698215	3.16883627913636e-31	3.05181568225682e-29	DNAJC15	chr13	+	43023203	43114224	8042	protein_coding	DnaJ_heat_shock_protein_family_(Hsp40)_member_C15
ENSG00000100867	1075.03153716635	6.33370047263656	-7.38016248073262	3.35036311709388e-31	3.21515629236845e-29	DHRS2	chr14	+	23630115	23645639	7556	protein_coding	dehydrogenase/reductase_(SDR_family)_member_2
ENSG00000125726	3.7875259485201	800.634604274594	7.67552816583588	4.61610842557461e-31	4.41411275900869e-29	CD70	chr19	-	6583183	6604103	1532	protein_coding	CD70_molecule
ENSG00000105855	41.7077692663269	3080.16221589394	6.20214035944403	5.0053082964874e-31	4.76936902908407e-29	ITGB8	chr7	+	20330702	20415754	15156	protein_coding	integrin_subunit_beta_8
ENSG00000148488	1179.31191488149	8.44338646668029	-7.1056685514327	5.30641398898962e-31	5.03847745165824e-29	ST8SIA6	chr10	-	17318383	17454330	2627	protein_coding	ST8_alpha-N-acetyl-neuraminide_alpha-28-sialyltransferase_6
ENSG00000154678	2.83950028546094	782.70217973432	8.04264564111025	7.9185582095185e-31	7.49234528694301e-29	PDE1C	chr7	-	31751179	32299329	13821	protein_coding	phosphodiesterase_1C
ENSG00000101160	223.724449642393	13287.9311613826	5.89143002096305	9.05493927052607e-31	8.53760462828692e-29	CTSZ	chr20	-	58995185	59007247	2038	protein_coding	cathepsin_Z
ENSG00000263753	1.89146593041347	709.917633060287	8.4568049917675	9.18278969834876e-31	8.6279828224973e-29	LINC00667	chr18	+	5237826	5246508	6652	lincRNA	long_intergenic_non-protein_coding_RNA_667
ENSG00000160588	839.926685481284	3.16919693313913	-7.99653125422572	9.65890162606082e-31	9.04381740445681e-29	MPZL3	chr11	-	118226690	118252350	3968	protein_coding	myelin_protein_zero-like_3
ENSG00000180964	0.943449169558452	632.913692353063	9.20472364751794	1.09807646448624e-30	1.02459273153411e-28	TCEAL8	chrX	-	103252995	103255203	1222	protein_coding	transcription_elongation_factor_A_(SII)-like_8
ENSG00000169515	1.38777878078145e-17	551.690357598588	12.1100850990118	1.14501882605304e-30	1.06470957459814e-28	CCDC8	chr19	-	46410372	46413584	3213	protein_coding	coiled-coil_domain_containing_8
ENSG00000109861	41.7077692663269	2970.45797176851	6.14982148342771	1.19161635461896e-30	1.10423115528024e-28	CTSC	chr11	-	88293592	88337787	11421	protein_coding	cathepsin_C
ENSG00000124126	38461.442912585	677.21732947562	-5.82739892446146	1.22293468943422e-30	1.12937180942751e-28	PREX1	chr20	-	48624252	48827883	7393	protein_coding	phosphatidylinositol-345-trisphosphate-dependent_Rac_exchange_factor_1
ENSG00000119866	1.38777878078145e-17	545.361266576771	12.093442220433	1.47974911487272e-30	1.3618742195105e-28	BCL11A	chr2	-	60451167	60553567	8375	protein_coding	B-cell_CLL/lymphoma_11A_(zinc_finger_protein)
ENSG00000095627	542.253606672942	1.38777878078145e-17	-12.0852233497372	1.61275584705375e-30	1.47923721672284e-28	TDRD1	chr10	+	114179270	114232304	5256	protein_coding	tudor_domain_containing_1
ENSG00000049283	2478.07661829768	32.7048862771805	-6.23835165757186	1.75096992086236e-30	1.60056457240591e-28	EPN3	chr17	+	50532543	50543750	4642	protein_coding	epsin_3
ENSG00000132199	1625.82153201385	17.9370088411536	-6.49256179317853	2.09737275710971e-30	1.91073492460205e-28	ENOSF1	chr18	-	670324	712676	10616	protein_coding	enolase_superfamily_member_1
ENSG00000172260	1.38777878078145e-17	536.92247854716	12.0709487848764	2.18485967377168e-30	1.98373488090664e-28	NEGR1	chr1	-	71395940	72282734	13417	protein_coding	neuronal_growth_regulator_1
ENSG00000126005	17.0596547238187	1552.74158602947	6.49730978148843	2.79653058022574e-30	2.53057864518011e-28	MMP24-AS1	chr20	-	35201745	35278131	5511	protein_coding	MMP24_antisense_RNA_1
ENSG00000104361	2251.50379782946	29.5403406883372	-6.24628105988845	3.29247768112938e-30	2.96939642639916e-28	NIPAL2	chr8	-	98189833	98294393	5599	protein_coding	NIPA-like_domain_containing_2
ENSG00000274173	522.345534485695	1.38777878078145e-17	-12.0312731754649	3.87818762751659e-30	3.47535046495939e-28	RP4-568C11.4	chr20	+	24931840	24932983	1144	lincRNA	NA
ENSG00000090530	1.89146593041347	667.723692950163	8.36842001306251	3.87925717552761e-30	3.47535046495939e-28	P3H2	chr3	-	189956728	190122437	5605	protein_coding	prolyl_3-hydroxylase_2
ENSG00000197308	789.682503438834	3.16919693313913	-7.90755469015628	4.25300201666283e-30	3.79756464838841e-28	GATA3-AS1	chr10	-	8050450	8053484	2214	lincRNA	GATA3_antisense_RNA_1
ENSG00000105928	4.73554534719345	790.086119251016	7.34369351710947	4.38235865826398e-30	3.90015457355599e-28	DFNA5	chr7	-	24698353	24758113	8897	protein_coding	deafness_autosomal_dominant_5
ENSG00000038002	516.657513859372	1.38777878078145e-17	-12.0154808810585	5.07697451155213e-30	4.50347679863535e-28	AGA	chr4	-	177430770	177442503	2675	protein_coding	aspartylglucosaminidase
ENSG00000230836	1564.20130885438	17.9370088411536	-6.43682360427032	5.31112645942538e-30	4.68079103016926e-28	LINC01293	chr2	+	74940258	74942670	1266	lincRNA	long_intergenic_non-protein_coding_RNA_1293
ENSG00000279192	1.38777878078145e-17	516.880356974293	12.0160778798715	5.31158516365717e-30	4.68079103016926e-28	PWAR5	chr15	+	24985053	24988232	3180	TEC	Prader_Willi/Angelman_region_RNA_5
ENSG00000183486	14.215637608667	1341.77188572826	6.54758963153645	5.98495642497253e-30	5.25701416794167e-28	MX2	chr21	+	41361943	41409390	13047	protein_coding	MX_dynamin-like_GTPase_2
ENSG00000164484	1.38777878078145e-17	512.660962958469	12.0042553112784	6.36879580730093e-30	5.57600479674276e-28	TMEM200A	chr6	+	130365734	130443063	6137	protein_coding	transmembrane_protein_200A
ENSG00000074047	0.943449169558452	584.39066120637	9.08967074325282	7.02418557667035e-30	6.11675830121325e-28	GLI2	chr2	+	120735623	120992653	7406	protein_coding	GLI_family_zinc_finger_2
ENSG00000101282	3.7875259485201	714.137027070893	7.5106113527482	7.03179957493179e-30	6.11675830121325e-28	RSPO4	chr20	-	958452	1002264	2710	protein_coding	R-spondin_4
ENSG00000142871	199.076359654454	10906.0832458518	5.77474737592896	7.94109327885465e-30	6.88551515619275e-28	CYR61	chr1	+	85580761	85583962	2455	protein_coding	cysteine-rich_angiogenic_inducer_61
ENSG00000034053	4.73554534719345	766.87945219799	7.30069005881116	8.81814244484635e-30	7.62147529383739e-28	APBA2	chr15	+	28884483	29118315	6869	protein_coding	amyloid_beta_(A4)_precursor_protein-binding_family_A_member_2
ENSG00000102109	1.89146593041347	642.407328880161	8.31266736786501	9.53034457877974e-30	8.21071156266372e-28	PCSK1N	chrX	-	48831094	48835633	1363	protein_coding	proprotein_convertase_subtilisin/kexin_type_1_inhibitor
ENSG00000178163	1.38777878078145e-17	503.167326422213	11.9772948897593	1.00851391134303e-29	8.63351940738925e-28	ZNF518B	chr4	-	10439874	10457410	10905	protein_coding	zinc_finger_protein_518B
ENSG00000171564	501.489458852575	1.38777878078145e-17	-11.9725029129378	1.00851391134303e-29	8.63351940738925e-28	FGB	chr4	+	154562956	154571086	2708	protein_coding	fibrinogen_beta_chain
ENSG00000165475	1414.41676639219	15.8273130116772	-6.47086046630679	1.06155064046283e-29	9.03168858965093e-28	CRYL1	chr13	-	20403667	20525857	2196	protein_coding	crystallin_lambda_1
ENSG00000167183	759.346393519424	3.16919693313913	-7.85104954593811	1.06172412776064e-29	9.03168858965093e-28	PRR15L	chr17	-	47951967	47957878	1519	protein_coding	proline_rich_15-like
ENSG00000206538	4.73554534719345	758.440664178293	7.28472907768002	1.12985697579974e-29	9.58104503440748e-28	VGLL3	chr3	-	86937969	86991119	11574	protein_coding	vestigial_like_family_member_3
ENSG00000189143	4939.09352980245	84.3924662927222	-5.86897201810697	1.18692558174186e-29	1.0028779134366e-27	CLDN4	chr7	+	73799542	73832693	4702	protein_coding	claudin_4
ENSG00000177694	570.693709785625	1.05955866386509	-8.91851541380041	1.19009468330384e-29	1.0028779134366e-27	NAALADL2	chr3	+	174438573	175810552	13599	protein_coding	N-acetylated_alpha-linked_acidic_dipeptidase-like_2
ENSG00000169908	9.47560276457628	1035.86582023665	6.75302482661955	1.20531546701291e-29	1.01254008982773e-27	TM4SF1	chr3	-	149369022	149377865	3668	protein_coding	transmembrane_4_L_six_family_member_1
ENSG00000183780	1.38777878078145e-17	494.728538389194	11.9528996495835	1.46577565521517e-29	1.22751882976808e-27	SLC35F3	chr1	+	233904933	234324516	3195	protein_coding	solute_carrier_family_35_member_F3
ENSG00000167779	14.215637608667	1287.97461214746	6.48855976657704	1.59365388672969e-29	1.330478969336e-27	IGFBP6	chr12	+	53097436	53102345	1279	protein_coding	insulin_like_growth_factor_binding_protein_6
ENSG00000104413	7766.98776955771	142.409135977352	-5.76804805077055	1.69604139551742e-29	1.41158803307169e-27	ESRP1	chr8	+	94641074	94707466	4875	protein_coding	epithelial_splicing_regulatory_protein_1
ENSG00000163694	3345.4997593448	54.8567063762112	-5.92730691873168	1.91657589056196e-29	1.59022724507366e-27	RBM47	chr4	-	40423267	40630875	8544	protein_coding	RNA_binding_motif_protein_47
ENSG00000243137	1.89146593041347	623.420055825471	8.26939180620061	1.92956953316499e-29	1.59609730157445e-27	PSG4	chr19	-	43192702	43207299	6274	protein_coding	pregnancy_specific_beta-1-glycoprotein_4
ENSG00000041982	1.89146593041347	621.310358819271	8.26450229050739	2.08073393485813e-29	1.71587373967536e-27	TNC	chr9	-	115019578	115118257	9636	protein_coding	tenascin_C
ENSG00000182261	1.38777878078145e-17	486.289750355394	11.9280847926133	2.14249187136463e-29	1.75606187851729e-27	NLRP10	chr11	-	7959424	7965426	2531	protein_coding	NLR_family_pyrin_domain_containing_10
ENSG00000170955	1.38777878078145e-17	486.289750355394	11.9280847926133	2.14249187136463e-29	1.75606187851729e-27	PRKCDBP	chr11	-	6318946	6320647	1672	protein_coding	protein_kinase_C_delta_binding_protein
ENSG00000174607	1.89146593041347	619.200661813044	8.25959614712264	2.33097032225505e-29	1.90475593060393e-27	UGT8	chr4	+	114598455	114678224	4699	protein_coding	UDP_glycosyltransferase_8
ENSG00000197928	0.943449169558452	553.800054605787	9.01211920778491	2.51668454489886e-29	2.05029956005265e-27	ZNF677	chr19	-	53235381	53254898	9348	protein_coding	zinc_finger_protein_677
ENSG00000005001	786.838493134128	4.22402546552972	-7.50106471866216	2.5548064675054e-29	2.07508768682984e-27	PRSS22	chr16	-	2852727	2858170	2387	protein_coding	protease_serine_22
ENSG00000006756	2208.8436433466	32.7048862771805	-6.0724313283747	2.74373192668134e-29	2.22184610014682e-27	ARSD	chrX	-	2903970	2929351	7030	protein_coding	arylsulfatase_D
ENSG00000100219	107263.740041804	2194.08947485411	-5.61131897689223	2.9248371372878e-29	2.36141192347613e-27	XBP1	chr22	-	28794555	28800597	3028	protein_coding	X-box_binding_protein_1
ENSG00000142910	1.38777878078145e-17	476.796113816386	11.8996481862743	3.47190568001025e-29	2.79472861394497e-27	TINAGL1	chr1	+	31576485	31587686	5281	protein_coding	tubulointerstitial_nephritis_antigen-like_1
ENSG00000149418	3746.50521141089	64.3503435704753	-5.86081041472997	3.56482398958495e-29	2.86098344354607e-27	ST14	chr11	+	130159562	130210376	4350	protein_coding	suppression_of_tumorigenicity_14
ENSG00000188959	1038.05940324337	9.49823147579758	-6.75404710709473	3.68087692937095e-29	2.94535689250495e-27	C9orf152	chr9	-	110190048	110208189	2947	protein_coding	chromosome_9_open_reading_frame_152
ENSG00000137841	4.73554534719345	720.466118086671	7.21063539834995	3.79699847840701e-29	3.02928582747703e-27	PLCB2	chr15	-	40278176	40307935	7350	protein_coding	phospholipase_C_beta_2
ENSG00000167077	10.4236106947186	1035.86582023665	6.61722675217907	4.03326867862255e-29	3.20829271940224e-27	MEI1	chr22	+	41699499	41799456	5393	protein_coding	meiotic_double-stranded_break_formation_protein_1
ENSG00000023171	4.73554534719345	717.301572578801	7.20428566873121	4.18896779693174e-29	3.32234428270769e-27	GRAMD1B	chr11	+	123454398	123627774	12517	protein_coding	GRAM_domain_containing_1B
ENSG00000170561	471.153348823204	1.38777878078145e-17	-11.8825041567607	4.22254628898286e-29	3.33915493339331e-27	IRX2	chr5	-	2745845	2751662	3384	protein_coding	iroquois_homeobox_2
ENSG00000143556	467.361335067902	1.38777878078145e-17	-11.8708490518282	5.14341846968887e-29	4.05548018870263e-27	S100A7	chr1	-	153457744	153460701	536	protein_coding	S100_calcium_binding_protein_A7
ENSG00000162069	1309.18838528168	15.8273130116772	-6.35933648268361	6.65140043679113e-29	5.22920303727433e-27	CCDC64B	chr16	-	3027682	3036926	4690	protein_coding	coiled-coil_domain_containing_64B
ENSG00000223764	1402.09272175827	17.9370088411536	-6.27899294177872	7.18183158395062e-29	5.62980437479106e-27	RP11-54O7.3	chr1	-	916865	921016	4152	lincRNA	NA
ENSG00000160703	4.73554534719345	700.423996536167	7.169940212363	7.36380985239764e-29	5.75572453564507e-27	NLRX1	chr11	+	119166568	119184016	5320	protein_coding	NLR_family_member_X1
ENSG00000114450	48.3437963521191	2826.99857560338	5.86600741433795	7.74884053854753e-29	6.03916861163215e-27	GNB4	chr3	-	179396089	179451590	7035	protein_coding	guanine_nucleotide_binding_protein_(G_protein)_beta_polypeptide_4
ENSG00000072657	1.38777878078145e-17	458.863689239658	11.8443555710129	8.48108727256856e-29	6.57186779862309e-27	TRHDE	chr12	+	72087266	72670757	11950	protein_coding	thyrotropin-releasing_hormone_degrading_enzyme
ENSG00000138675	1.38777878078145e-17	458.863689239658	11.8443555710129	8.48108727256856e-29	6.57186779862309e-27	FGF5	chr4	+	80266599	80336680	5998	protein_coding	fibroblast_growth_factor_5
ENSG00000188641	1.38777878078145e-17	457.808840735013	11.841036116742	8.92097769127023e-29	6.89292505509436e-27	DPYD	chr1	-	97077743	97921049	6443	protein_coding	dihydropyrimidine_dehydrogenase
ENSG00000107738	1.89146593041347	583.335812703014	8.17353300151188	9.12277586453977e-29	7.02870782751941e-27	C10orf54	chr10	-	71747559	71773498	5128	protein_coding	chromosome_10_open_reading_frame_54
ENSG00000120322	454.089286921204	1.38777878078145e-17	-11.8292983197693	9.87342961473619e-29	7.5728624253376e-27	PCDHB8	chr5	+	141177790	141180529	2740	protein_coding	protocadherin_beta_8
ENSG00000116983	1.89146593041347	581.22611569628	8.16830696015208	9.88521684238981e-29	7.5728624253376e-27	HPCAL4	chr1	-	39678648	39691689	4962	protein_coding	hippocalcin_like_4
ENSG00000113205	452.193280042689	1.38777878078145e-17	-11.8232635923496	1.09320886806151e-28	8.35112474111805e-27	PCDHB3	chr5	+	141100473	141103827	3355	protein_coding	protocadherin_beta_3
ENSG00000105889	1.38777878078145e-17	450.42490120207	11.8175835906064	1.27466379941348e-28	9.68241803238982e-27	STEAP1B	chr7	-	22419444	22632925	2316	protein_coding	STEAP_family_member_1B
ENSG00000120149	449.349269724714	1.38777878078145e-17	-11.8141639050076	1.27466379941348e-28	9.68241803238982e-27	MSX2	chr5	+	174724533	174730893	2270	protein_coding	msh_homeobox_2
ENSG00000253125	448.401266285335	1.38777878078145e-17	-11.8111178764725	1.34189290275807e-28	1.01644618021837e-26	RP11-459E5.1	chr8	+	22690150	22798616	2191	processed_transcript	NA
ENSG00000124920	18.9556652446005	1405.06279582103	6.20218332263111	1.58184460605778e-28	1.19484654473261e-26	MYRF	chr11	+	61752642	61788518	10680	protein_coding	myelin_regulatory_factor
ENSG00000187372	443.66124908802	1.38777878078145e-17	-11.7957905121237	1.73789152207667e-28	1.30904979844468e-26	PCDHB13	chr5	+	141213919	141218979	5061	protein_coding	protocadherin_beta_13
ENSG00000085831	2953.97434159393	52.7470092132371	-5.80420236816969	1.8110837045238e-28	1.36038114696904e-26	TTC39A	chr1	-	51287258	51345116	9362	protein_coding	tetratricopeptide_repeat_domain_39A
ENSG00000183742	507.177479480698	1.05955866386509	-8.74833032581558	1.81681621826748e-28	1.36089628171669e-26	MACC1	chr7	-	20134655	20217404	9898	protein_coding	metastasis_associated_in_colon_cancer_1
ENSG00000233608	0.943449169558452	507.38672043844	8.88586841767257	1.90187093842393e-28	1.42066071261883e-26	TWIST2	chr2	+	238848032	238910543	1878	protein_coding	twist_family_bHLH_transcription_factor_2
ENSG00000166923	1.38777878078145e-17	441.986113163467	11.7903053960501	2.03220506032059e-28	1.50965404012686e-26	GREM1	chr15	+	32717974	32745107	14606	protein_coding	gremlin_1_DAN_family_BMP_antagonist
ENSG00000170819	439.869235329658	1.38777878078145e-17	-11.783410285744	2.03220506032059e-28	1.50965404012686e-26	BFSP2	chr3	+	133399995	133475222	2070	protein_coding	beaded_filament_structural_protein_2
ENSG00000260549	1.38777878078145e-17	440.931264658567	11.7868590688883	2.14146339689693e-28	1.58626524447703e-26	MT1L	chr16	+	56617476	56618818	411	unitary_pseudogene	metallothionein_1L_(gene/pseudogene)
ENSG00000234456	1.89146593041347	562.238842634234	8.12040063537083	2.14709936302795e-28	1.58626524447703e-26	MAGI2-AS3	chr7	+	79452877	79471208	11625	processed_transcript	MAGI2_antisense_RNA_3
ENSG00000167608	2154.8074476676	35.8694319418408	-5.90391871507059	2.3657497486464e-28	1.74302753338794e-26	TMC4	chr19	-	54160108	54173250	3062	protein_coding	transmembrane_channel_like_4
ENSG00000163683	16901.9488468362	366.037020759732	-5.5285934497838	2.4918186961306e-28	1.83090961743482e-26	SMIM14	chr4	-	39546330	39639090	6721	protein_coding	small_integral_membrane_protein_14
ENSG00000213445	53.0838153076414	2911.38645570067	5.77384299419237	2.5901789761652e-28	1.89800995302366e-26	SIPA1	chr11	+	65585395	65650930	4692	protein_coding	signal-induced_proliferation-associated_1
ENSG00000110436	499.593451976376	1.05955866386509	-8.72659978473643	2.62602560391366e-28	1.91906250501723e-26	SLC1A2	chr11	-	35251206	35420063	12331	protein_coding	solute_carrier_family_1_(glial_high_affinity_glutamate_transporter)_member_2
ENSG00000169213	53.0838153076414	2908.22191019703	5.77227406183971	2.65464217263857e-28	1.93473191425329e-26	RAB3B	chr1	-	51907956	51990764	12844	protein_coding	RAB3B_member_RAS_oncogene_family
ENSG00000166341	0.943449169558452	500.00278090992	8.86472382293751	2.75083305635322e-28	1.99943299724046e-26	DCHS1	chr11	-	6621323	6655854	10765	protein_coding	dachsous_cadherin-related_1
ENSG00000136114	5.68356074469745	712.027330065599	6.93678855019056	2.8702145559941e-28	2.08059692787465e-26	THSD1	chr13	-	52377167	52406494	3348	protein_coding	thrombospondin_type_1_domain_containing_1
ENSG00000006468	0.943449169558452	496.838235397521	8.85556611709988	3.16363057243836e-28	2.28714375379016e-26	ETV1	chr7	-	13891228	13991425	9616	protein_coding	ets_variant_1
ENSG00000227825	1.38777878078145e-17	432.492476618755	11.7589880030656	3.26882573633859e-28	2.35687579695471e-26	SLC9A7P1	chr12	-	98453835	98457145	3311	transcribed_processed_pseudogene	solute_carrier_family_9_subfamily_A_(NHE7_cation_proton_antiporter_7)_member_7_pseudogene_1
ENSG00000064655	429.441197491719	1.38777878078145e-17	-11.7488064688592	3.63749029306848e-28	2.61569501981026e-26	EYA2	chr20	+	46894624	47188844	3618	protein_coding	EYA_transcriptional_coactivator_and_phosphatase_2
ENSG00000130224	1.38777878078145e-17	429.327931103535	11.748395956091	3.83779262198193e-28	2.75239137883949e-26	LRCH2	chrX	-	115110616	115234072	4929	protein_coding	leucine-rich_repeats_and_calponin_homology_(CH)_domain_containing_2
ENSG00000185630	4077.35840944412	80.1730720619615	-5.66625692054636	4.27199739529663e-28	3.05566795123525e-26	PBX1	chr1	+	164555584	164899296	21249	protein_coding	pre-B-cell_leukemia_homeobox_1
ENSG00000144452	543.201610110249	2.11437967028788	-7.92572267378118	4.58063898863979e-28	3.2677648404143e-26	ABCA12	chr2	-	214931542	215138428	9416	protein_coding	ATP_binding_cassette_subfamily_A_member_12
ENSG00000122691	1.89146593041347	543.251569569425	8.07084872688549	4.78083390642749e-28	3.40158224592939e-26	TWIST1	chr7	-	19020991	19117672	2033	protein_coding	twist_family_bHLH_transcription_factor_1
ENSG00000154736	1.38777878078145e-17	422.998840072603	11.7269756725163	5.60340808008118e-28	3.97635532335445e-26	ADAMTS5	chr21	-	26917912	26966513	9056	protein_coding	ADAM_metallopeptidase_with_thrombospondin_type_1_motif_5
ENSG00000236453	0.943449169558452	484.180053346817	8.81834268445075	5.85205974595749e-28	4.14190664329369e-26	AC003092.1	chr7	+	94022833	94066661	1064	lincRNA	NA
ENSG00000139117	1.38777878078145e-17	421.943991567382	11.7233744998393	5.91750046125164e-28	4.17725961879874e-26	CPNE8	chr12	-	38646822	38907430	5178	protein_coding	copine_VIII
ENSG00000169554	0.943449169558452	482.070356338188	8.81204432338341	6.44160697386813e-28	4.5285112265794e-26	ZEB2	chr2	-	144384081	144524583	21963	protein_coding	zinc_finger_E-box_binding_homeobox_2
ENSG00000111816	3232.68735084179	62.2406464223989	-5.69600645272015	6.44866984723908e-28	4.5285112265794e-26	FRK	chr6	-	115931149	116060758	13230	protein_coding	fyn-related_Src_family_tyrosine_kinase
ENSG00000121270	731.854293899755	5.2788609071888	-7.08295780733732	6.80962149403229e-28	4.76956501839155e-26	ABCC11	chr16	-	48166910	48247568	7245	protein_coding	ATP_binding_cassette_subfamily_C_member_11
ENSG00000080200	2.83950028546094	584.39066120637	7.62119049237953	7.56212060177776e-28	5.28290528879635e-26	CRYBG3	chr3	+	97822040	97944963	10929	protein_coding	crystallin_beta-gamma_domain_containing_3
ENSG00000259937	415.221145888376	1.38777878078145e-17	-11.7002406448411	7.78663980080968e-28	5.42569842037813e-26	RP11-438D14.2	chr12	-	33404872	33405896	1025	sense_intronic	NA
ENSG00000248663	413.325139007361	1.38777878078145e-17	-11.6936398988317	8.69768794482649e-28	6.04489312165441e-26	LINC00992	chr5	+	117415509	117546298	1144	lincRNA	long_intergenic_non-protein_coding_RNA_992
ENSG00000089486	31.2797246983149	1818.5634083836	5.85557575745906	9.59401297988191e-28	6.65069804667084e-26	CDIP1	chr16	-	4510675	4538828	4268	protein_coding	cell_death-inducing_p53_target_1
ENSG00000108798	1.89146593041347	524.264296501571	8.01953414918681	1.09308555466095e-27	7.55798591461209e-26	ABI3	chr17	+	49210227	49223225	2456	protein_coding	ABI_family_member_3
ENSG00000122591	18.007660057365	1251.05491459084	6.10821307510164	1.10847972932627e-27	7.64482464987526e-26	FAM126A	chr7	-	22889371	23014130	14499	protein_coding	family_with_sequence_similarity_126_member_A
ENSG00000197343	0.943449169558452	469.41217428529	8.77366556504226	1.15484841510013e-27	7.94429652081384e-26	ZNF655	chr7	+	99558406	99576453	8401	protein_coding	zinc_finger_protein_655
ENSG00000174963	406.689114922694	1.38777878078145e-17	-11.6702965184158	1.2861370312742e-27	8.82492905479391e-26	ZIC4	chr3	-	147386046	147406860	8568	protein_coding	Zic_family_member_4
ENSG00000186603	3.7875259485201	570.677630662136	7.18714749167356	1.32997216379787e-27	9.10254552512014e-26	HPDL	chr1	+	45326905	45328533	1629	protein_coding	4-hydroxyphenylpyruvate_dioxygenase-like
ENSG00000182575	2292.26794544596	42.198523384799	-5.75941575500372	1.40493478025485e-27	9.59125855300058e-26	NXPH3	chr17	+	49575858	49583827	5648	protein_coding	neurexophilin_3
ENSG00000101445	1.38777878078145e-17	406.121263986711	11.6682495688683	1.43985167673216e-27	9.80480816029278e-26	PPP1R16B	chr20	+	38805705	38923024	6400	protein_coding	protein_phosphatase_1_regulatory_subunit_16B
ENSG00000163297	1.89146593041347	517.935205478221	8.00201551841733	1.4928818202289e-27	1.01403151547336e-25	ANTXR2	chr4	-	79901149	80125454	9864	protein_coding	anthrax_toxin_receptor_2
ENSG00000159251	1.38777878078145e-17	405.066415481169	11.6644985883905	1.52375911710117e-27	1.02981675067043e-25	ACTC1	chr15	-	34788096	34796139	4639	protein_coding	actin_alpha_cardiac_muscle_1
ENSG00000105556	402.897101159227	1.38777878078145e-17	-11.6567858780986	1.52375911710117e-27	1.02981675067043e-25	MIER2	chr19	-	301444	344807	7931	protein_coding	mesoderm_induction_early_response_1_family_member_2
ENSG00000198947	0.943449169558452	464.137931762656	8.75736811100998	1.55433829869707e-27	1.04785716406663e-25	DMD	chrX	-	31097677	33339441	18910	protein_coding	dystrophin
ENSG00000150051	1.89146593041347	516.880356974293	7.99907495250863	1.56135866662973e-27	1.04996503252711e-25	MKX	chr10	-	27672875	27746060	4106	protein_coding	mohawk_homeobox
ENSG00000180767	1.38777878078145e-17	404.011566975606	11.6607378300048	1.61276373842717e-27	1.08183549677679e-25	CHST13	chr3	+	126524283	126543291	1789	protein_coding	carbohydrate_(chondroitin_4)_sulfotransferase_13
ENSG00000172201	461.673314434214	1.05955866386509	-8.61274819324255	1.63379974823702e-27	1.09322689853497e-25	ID4	chr6	+	19837386	19840684	2344	protein_coding	inhibitor_of_DNA_binding_4_dominant_negative_helix-loop-helix_protein
ENSG00000197614	1.38777878078145e-17	402.956718470021	11.6569672426005	1.70718784489246e-27	1.13950562934084e-25	MFAP5	chr12	-	8637346	8662888	3876	protein_coding	microfibrillar_associated_protein_5
ENSG00000254585	1.38777878078145e-17	400.847021458787	11.6493963742809	1.91369109705012e-27	1.27306986113216e-25	MAGEL2	chr15	-	23643544	23647841	4298	protein_coding	MAGE_family_member_L2
ENSG00000125618	82.4719287805685	3870.24374328159	5.55016408006674	1.9167335297028e-27	1.27306986113216e-25	PAX8	chr2	-	113215997	113278950	7400	protein_coding	paired_box_8
ENSG00000184860	398.157083954044	1.38777878078145e-17	-11.6397176840123	2.02652665701772e-27	1.34268594184618e-25	SDR42E1	chr16	-	81988855	82011488	11911	protein_coding	short_chain_dehydrogenase/reductase_family_42E_member_1
ENSG00000196684	694.882159919633	5.2788609071888	-7.00818324770406	2.28787177607955e-27	1.51212623318042e-25	HSH2D	chr19	+	16134028	16158575	3398	protein_coding	hematopoietic_SH2_domain_containing
ENSG00000186472	11.3716180425464	912.448545507472	6.3101192391012	2.49026031676305e-27	1.64186698537487e-25	PCLO	chr7	-	82754013	83162930	22873	protein_coding	piccolo_presynaptic_cytomatrix_protein
ENSG00000106066	5.68356074469745	643.462177383142	6.79073723551592	3.00957868147294e-27	1.97942192011218e-25	CPVL	chr7	-	28995231	29195451	3340	protein_coding	carboxypeptidase_vitellogenic-like
ENSG00000198889	1.38777878078145e-17	392.40823341296	11.6187092353958	3.03760381146711e-27	1.99299329391781e-25	DCAF12L1	chrX	-	126549383	126552851	3382	protein_coding	DDB1_and_CUL4_associated_factor_12-like_1
ENSG00000109846	0.943449169558452	448.315204192517	8.70734111860419	3.31870257430522e-27	2.17213916550278e-25	CRYAB	chr11	-	111908565	111923722	3034	protein_coding	crystallin_alpha_B
ENSG00000100979	19.9036703031239	1275.31643012816	5.99247658587839	3.36256346600137e-27	2.19551783109426e-25	PLTP	chr20	-	45898621	45912155	2541	protein_coding	phospholipid_transfer_protein
ENSG00000059804	2.83950028546094	546.41611508043	7.52427802529605	3.61000863322098e-27	2.35138871505886e-25	SLC2A3	chr12	-	7919230	7936275	6159	protein_coding	solute_carrier_family_2_(facilitated_glucose_transporter)_member_3
ENSG00000213225	388.677049540724	1.38777878078145e-17	-11.6049632935495	3.62030488915441e-27	2.35241305158886e-25	AC018804.7	chr2	+	130229379	130232106	2728	transcribed_processed_pseudogene	NA
ENSG00000249695	1.38777878078145e-17	387.133990883568	11.5991929273833	4.32014271603117e-27	2.80040789616578e-25	RP11-598F7.4	chr12	-	137411	149169	5439	antisense	NA
ENSG00000146592	1.38777878078145e-17	386.079142377618	11.5952577833639	4.58356605237453e-27	2.95694837723281e-25	CREB5	chr7	+	28299321	28825894	11674	protein_coding	cAMP_responsive_element_binding_protein_5
ENSG00000016402	383.937032332516	1.38777878078145e-17	-11.5872670098484	4.58356605237453e-27	2.95694837723281e-25	IL20RA	chr6	-	136999971	137045180	4730	protein_coding	interleukin_20_receptor_subunit_alpha
ENSG00000227051	18595.0829775865	458.863689239658	-5.34034378634415	4.82829944503087e-27	3.10739672636521e-25	C14orf132	chr14	+	96039324	96094080	7966	lincRNA	chromosome_14_open_reading_frame_132
ENSG00000167306	1648.57361441052	29.5403406883372	-5.79664072877713	5.49265165444876e-27	3.52654391699679e-25	MYO5B	chr18	-	49822813	50195093	10488	protein_coding	myosin_VB
ENSG00000145703	0.943449169558452	436.7118706388	8.66951971488434	6.19295044526633e-27	3.96672450610574e-25	IQGAP2	chr5	+	76403249	76708132	7904	protein_coding	IQ_motif_containing_GTPase_activating_protein_2
ENSG00000108679	165.896238196422	6909.26227508449	5.37908070485881	7.53685097788775e-27	4.81608349454315e-25	LGALS3BP	chr17	-	78971238	78980109	3584	protein_coding	lectin_galactoside-binding_soluble_3_binding_protein
ENSG00000107105	1.38777878078145e-17	376.585505822952	11.559349964218	7.85838593784103e-27	5.00967459101232e-25	ELAVL2	chr9	-	23690104	23826337	5140	protein_coding	ELAV_like_neuron-specific_RNA_binding_protein_2
ENSG00000173546	49.2918001659197	2364.97493206059	5.58063020480941	8.01253141885428e-27	5.09589439247227e-25	CSPG4	chr15	-	75674322	75712848	8290	protein_coding	chondroitin_sulfate_proteoglycan_4
ENSG00000047346	4360.81143583543	100.215194550859	-5.44173631026535	8.83312603658163e-27	5.60456651064612e-25	FAM214A	chr15	-	52581317	52709817	9832	protein_coding	family_with_sequence_similarity_214_member_A
ENSG00000145335	1.38777878078145e-17	372.366111797988	11.5430994903242	1.00238484744453e-26	6.34514314464536e-25	SNCA	chr4	-	89724099	89838315	4014	protein_coding	synuclein_alpha
ENSG00000168952	3.7875259485201	522.15459949383	7.0589767406278	1.06769432404636e-26	6.74272719958648e-25	STXBP6	chr14	-	24809656	25050297	8067	protein_coding	syntaxin_binding_protein_6_(amisyn)
ENSG00000184012	369.716980701241	1.38777878078145e-17	-11.5328372594719	1.13311397983085e-26	7.13914756544827e-25	TMPRSS2	chr21	-	41464551	41531116	6117	protein_coding	transmembrane_protease_serine_2
ENSG00000037757	423.753176851265	1.05955866386509	-8.4891361468167	1.17425069877588e-26	7.38108259748025e-25	MRI1	chr19	+	13764532	13774282	3456	protein_coding	methylthioribose-1-phosphate_isomerase_1
ENSG00000169174	1.89146593041347	472.5767197987	7.86982458991253	1.22192245146729e-26	7.66287461075976e-25	PCSK9	chr1	+	55039548	55064852	4981	protein_coding	proprotein_convertase_subtilisin/kexin_type_9
ENSG00000138613	470.205345384415	2.11437967028788	-7.71757910746222	1.28301254855013e-26	8.02731238612591e-25	APH1B	chr15	+	63276018	63309126	5494	protein_coding	aph-1_homolog_B_gamma_secretase_subunit
ENSG00000146373	0.943449169558452	422.998840072603	8.62350454819871	1.30849075971726e-26	8.16776894132767e-25	RNF217	chr6	+	124962545	125092633	12779	protein_coding	ring_finger_protein_217
ENSG00000171604	6995.31297534579	172.999743175568	-5.33657113581164	1.39614449936526e-26	8.69478812237499e-25	CXXC5	chr5	+	139647299	139683882	3852	protein_coding	CXXC_finger_protein_5
ENSG00000148516	1.89146593041347	469.41217428529	7.86013376199691	1.41491331739884e-26	8.79137154769061e-25	ZEB1	chr10	+	31318495	31529814	8650	protein_coding	zinc_finger_E-box_binding_homeobox_1
ENSG00000196636	1.38777878078145e-17	367.091869266177	11.5225255590663	1.45058002048709e-26	8.99226226033445e-25	SDHAF3	chr7	+	97116590	97181763	2303	protein_coding	succinate_dehydrogenase_complex_assembly_factor_3
ENSG00000091592	3.7875259485201	512.660962958469	7.0325109144281	1.59628679948209e-26	9.850221930168e-25	NLRP1	chr17	-	5499427	5619424	12808	protein_coding	NLR_family_pyrin_domain_containing_1
ENSG00000198885	3.7875259485201	512.660962958469	7.0325109144281	1.59628679948209e-26	9.850221930168e-25	ITPRIPL1	chr2	+	96325331	96330517	4652	protein_coding	inositol_145-trisphosphate_receptor_interacting_protein-like_1
ENSG00000145287	30.3317204673078	1574.8934045599	5.69226043012325	1.64673793736866e-26	1.01383413742199e-24	PLAC8	chr4	-	83090048	83137075	3853	protein_coding	placenta_specific_8
ENSG00000267131	360.236946274427	1.38777878078145e-17	-11.4953753672963	1.98214314654124e-26	1.21755061707588e-24	RP11-332H18.5	chr17	-	61361668	61400243	470	antisense	NA
ENSG00000135480	159.260213844189	6352.30226648562	5.31667928730198	2.14123788103057e-26	1.31228683408796e-24	KRT7	chr12	+	52232520	52252186	4093	protein_coding	keratin_7_type_II
ENSG00000131094	26.539703107702	1402.95309881798	5.71728729963489	2.28363721136194e-26	1.3963846041176e-24	C1QL1	chr17	-	44959693	44968071	1295	protein_coding	complement_component_1_q_subcomponent-like_1
ENSG00000275874	3.7875259485201	502.112477918127	7.00252355190773	2.63314824831751e-26	1.60536832903681e-24	LINC00162	chr21	-	44999208	45004727	733	lincRNA	long_intergenic_non-protein_coding_RNA_162
ENSG00000124466	1280.74828227648	22.1564016332808	-5.84545696977095	2.637314283777e-26	1.60536832903681e-24	LYPD3	chr19	-	43460787	43465660	2519	protein_coding	LY6/PLAUR_domain_containing_3
ENSG00000187013	582.069751027154	4.22402546552972	-7.06627253523927	2.92591534123555e-26	1.7770322768414e-24	C17orf82	chr17	+	61411751	61413280	1530	lincRNA	chromosome_17_open_reading_frame_82
ENSG00000188549	64.4598598810663	2786.91433255699	5.43129736120377	3.00970949209377e-26	1.82381631828765e-24	C15orf52	chr15	-	40331452	40340967	7510	protein_coding	chromosome_15_open_reading_frame_52
ENSG00000228630	659.806032799524	6.33370047263656	-6.67600645181189	3.36582752628892e-26	2.03504271466159e-24	HOTAIR	chr12	-	53962308	53974956	2602	antisense	HOX_transcript_antisense_RNA
ENSG00000183837	4.73554534719345	539.03217555462	6.79215722621254	3.38450216377079e-26	2.04175582434548e-24	PNMA3	chrX	+	153056409	153060467	3748	protein_coding	paraneoplastic_Ma_antigen_3
ENSG00000175445	1.38777878078145e-17	352.323990173303	11.4633069111513	3.51200600893265e-26	2.11394540260888e-24	LPL	chr8	+	19901717	19967258	4382	protein_coding	lipoprotein_lipase
ENSG00000163520	39.8117613778941	1851.26371192574	5.53459107096325	3.68355432080001e-26	2.21226560834506e-24	FBLN2	chr3	+	13549131	13638422	4812	protein_coding	fibulin_2
ENSG00000152192	0.943449169558452	404.011566975606	8.5572667056872	3.74816261328067e-26	2.24606562288281e-24	POU4F1	chr13	-	78598362	78603560	4547	protein_coding	POU_class_4_homeobox_1
ENSG00000204792	1148.97580500297	20.0467050958546	-5.83237435072766	3.80354186602662e-26	2.27419756007259e-24	LINC01291	chr2	+	74918148	74938418	4176	lincRNA	long_intergenic_non-protein_coding_RNA_1291
ENSG00000186310	1.38777878078145e-17	350.214293159551	11.454645128011	3.99521818321133e-26	2.38351888337338e-24	NAP1L3	chrX	-	93670930	93673568	2639	protein_coding	nucleosome_assembly_protein_1-like_3
ENSG00000123572	18.007660057365	1073.84036630274	5.88787037892335	4.02173974712861e-26	2.39404490112738e-24	NRK	chrX	+	105822543	105958610	9573	protein_coding	Nik_related_kinase
ENSG00000144583	1.89146593041347	448.315204192517	7.79380931555884	4.04862483983277e-26	2.40474047204693e-24	MARCH4	chr2	-	216257865	216372027	4447	protein_coding	membrane_associated_ring-CH-type_finger_4
ENSG00000020633	0.943449169558452	400.847021458787	8.54592524996337	4.44401599203864e-26	2.63378758772119e-24	RUNX3	chr1	-	24899511	24965121	4523	protein_coding	runt-related_transcription_factor_3
ENSG00000152137	346.964898068051	1.38777878078145e-17	-11.4412387118759	4.54795370625746e-26	2.68947630795918e-24	HSPB8	chr12	+	119178642	119221131	2860	protein_coding	heat_shock_protein_family_B_(small)_member_8
ENSG00000184678	1066.49950626134	17.9370088411536	-5.88433630122742	4.58580452917974e-26	2.70592570971249e-24	HIST2H2BE	chr1	-	149842204	149886652	2260	protein_coding	histone_cluster_2_H2be
ENSG00000203697	346.016894624318	1.38777878078145e-17	-11.437292948789	4.85359575640916e-26	2.85768696871898e-24	CAPN8	chr1	-	223538007	223665734	5192	protein_coding	calpain_8
ENSG00000130701	345.068891180527	1.38777878078145e-17	-11.4333363644588	5.18065746506205e-26	3.03699150441007e-24	RBBP8NL	chr20	-	62410237	62427533	2793	protein_coding	RBBP8_N-terminal_like
ENSG00000156968	1.38777878078145e-17	347.049747638686	11.4415541575339	5.18065746506205e-26	3.03699150441007e-24	MPV17L	chr16	+	15395754	15413268	6009	protein_coding	MPV17_mitochondrial_membrane_protein-like
ENSG00000143631	1.38777878078145e-17	345.994899131666	11.4371639698448	5.53070188837709e-26	3.23516067509711e-24	FLG	chr1	-	152302175	152325203	12747	protein_coding	filaggrin
ENSG00000113448	4.73554534719345	526.37399350927	6.75788178279616	5.69259354116231e-26	3.32265102664465e-24	PDE4D	chr5	-	58969038	60522120	15979	protein_coding	phosphodiesterase_4D
ENSG00000181773	1.89146593041347	441.986113163467	7.77330246868724	5.80587539321884e-26	3.38145217826219e-24	GPR3	chr1	+	27392644	27395814	2115	protein_coding	G_protein-coupled_receptor_3
ENSG00000183779	9459.17389690205	254.223078856343	-5.21688483802194	6.42570747834477e-26	3.73438853148804e-24	ZNF703	chr8	+	37695751	37700021	3349	protein_coding	zinc_finger_protein_703
ENSG00000007264	392.469063306537	1.05955866386509	-8.37852594640053	6.64243094970129e-26	3.84723234418932e-24	MATK	chr19	-	3777970	3802129	4141	protein_coding	megakaryocyte-associated_tyrosine_kinase
ENSG00000175414	10.4236106947186	755.276118670848	6.16152789106178	6.64841011789743e-26	3.84723234418932e-24	ARL10	chr5	+	176365468	176401865	11459	protein_coding	ADP_ribosylation_factor_like_GTPase_10
ENSG00000171798	599.133812886003	5.2788609071888	-6.79433601456722	7.19902816967805e-26	4.156937764958e-24	KNDC1	chr10	+	133160447	133226412	7985	protein_coding	kinase_non-catalytic_C-lobe_domain_(KIND)_containing_1
ENSG00000249242	1298.76034751323	24.2660983632241	-5.73506181636794	7.2252519735192e-26	4.16316548542562e-24	TMEM150C	chr4	-	82483170	82562357	3671	protein_coding	transmembrane_protein_150C
ENSG00000162078	596.28980257647	5.2788609071888	-6.78747290650848	8.08309304202194e-26	4.64751997806319e-24	ZG16B	chr16	+	2830169	2839585	2665	protein_coding	zymogen_granule_protein_16B
ENSG00000079819	161.156220804481	6074.87711068663	5.2351959744819	8.12154294760869e-26	4.65969206649396e-24	EPB41L2	chr6	-	130839347	131063322	10247	protein_coding	erythrocyte_membrane_protein_band_4.1-like_2
ENSG00000227372	0.943449169558452	389.243687895396	8.50356003585926	8.38195418983266e-26	4.79889122469273e-24	TP73-AS1	chr1	-	3735601	3747336	7205	antisense	TP73_antisense_RNA_1
ENSG00000148346	474.945362578124	3.16919693313913	-7.17419988243595	8.5366265040806e-26	4.8770904726491e-24	LCN2	chr9	+	128149071	128153455	1598	protein_coding	lipocalin_2
ENSG00000144488	1.38777878078145e-17	338.610959581593	11.4060527981829	8.78325664706064e-26	5.00738475147225e-24	ESPNL	chr2	+	238100157	238133287	5362	protein_coding	espin-like
ENSG00000184731	432.285207811521	2.11437967028788	-7.59630639651736	8.82270243119427e-26	5.00869460546494e-24	FAM110C	chr2	-	38814	46870	3968	protein_coding	family_with_sequence_similarity_110_member_C
ENSG00000186854	1.89146593041347	433.547325123792	7.74549854707643	8.82270243119427e-26	5.00869460546494e-24	TRABD2A	chr2	-	84821650	84907008	8771	protein_coding	TraB_domain_containing_2A
ENSG00000156127	336.536860183695	1.38777878078145e-17	-11.3972301640732	9.38983514478582e-26	5.3194599687877e-24	BATF	chr14	+	75522425	75547015	980	protein_coding	basic_leucine_zipper_transcription_factor_ATF-like
ENSG00000154864	7.57958445112432	629.749146843922	6.3523933053378	1.02590296840536e-25	5.79968541845261e-24	PIEZO2	chr18	-	10666483	11148762	14796	protein_coding	piezo-type_mechanosensitive_ion_channel_component_2
ENSG00000153956	0.943449169558452	386.079142377618	8.49178665904636	1.0600155054457e-25	5.9799954225625e-24	CACNA2D1	chr7	-	81946444	82443798	9010	protein_coding	calcium_channel_voltage-dependent_alpha_2/delta_subunit_1
ENSG00000170271	2151.96343736868	49.5824634648189	-5.4362720838814	1.06815705558528e-25	6.01334512753916e-24	FAXDC2	chr5	-	154818491	154859252	7222	protein_coding	fatty_acid_hydroxylase_domain_containing_2
ENSG00000019582	9.47560276457628	700.423996536167	6.18856828868039	1.17095635215143e-25	6.57833520669073e-24	CD74	chr5	-	150401637	150412929	3184	protein_coding	CD74_molecule_major_histocompatibility_complex_class_II_invariant_chain
ENSG00000135457	0.943449169558452	383.969445365645	8.48388402298013	1.19304561631907e-25	6.68849648433679e-24	TFCP2	chr12	-	51093663	51173134	3827	protein_coding	transcription_factor_CP2
ENSG00000152377	14.215637608667	880.803090444412	5.94040929520225	1.23511732301273e-25	6.90999455028242e-24	SPOCK1	chr5	-	136975298	137598379	6222	protein_coding	sparc/osteonectin_cwcv_and_kazal-like_domains_proteoglycan_(testican)_1
ENSG00000231437	331.796842961041	1.38777878078145e-17	-11.3767737028126	1.31475238994784e-25	7.34029253567979e-24	RP11-88H9.2	chr1	+	111989770	111998842	3590	lincRNA	NA
ENSG00000170160	3.7875259485201	467.30247727628	6.89889538672526	1.32196999765803e-25	7.36533945389392e-24	CCDC144A	chr17	+	16689537	16777881	15566	protein_coding	coiled-coil_domain_containing_144A
ENSG00000180336	13.2676314239607	836.499453352505	5.96460405534288	1.54278461839364e-25	8.57788247826864e-24	MEIOC	chr17	+	44656404	44690308	8609	protein_coding	meiosis_specific_with_coiled-coil_domain
ENSG00000157510	1.89146593041347	422.998840072603	7.70997274515336	1.58692926146043e-25	8.80517170052306e-24	AFAP1L1	chr5	+	149271871	149341802	4721	protein_coding	actin_filament_associated_protein_1_like_1
ENSG00000102890	1288.33230974464	25.3209467810738	-5.66233967573169	1.63874285668675e-25	9.0739917604548e-24	ELMO3	chr16	+	67199111	67204029	2575	protein_coding	engulfment_and_cell_motility_3
ENSG00000115232	4.73554534719345	503.167326422213	6.69284700863338	1.66544262298087e-25	9.20293560887339e-24	ITGA4	chr2	+	181457202	181536187	7901	protein_coding	integrin_subunit_alpha_4
ENSG00000159374	1.89146593041347	420.889143062142	7.70276138825983	1.76832937744096e-25	9.75148670594541e-24	M1AP	chr2	-	74557883	74648338	3000	protein_coding	meiosis_1_associated_protein
ENSG00000166974	32.2277288921922	1491.56037294435	5.52671972853836	1.78034481398168e-25	9.79770984772039e-24	MAPRE2	chr18	+	34976928	35143470	6180	protein_coding	microtubule_associated_protein_RP/EB_family_member_2
ENSG00000171714	1.38777878078145e-17	328.062474507079	11.3604111753428	1.84937898931756e-25	1.01568948728997e-23	ANO5	chr11	+	22193176	22283357	6900	protein_coding	anoctamin_5
ENSG00000100181	1.89146593041347	419.834294556883	7.69914214728968	1.86699206095318e-25	1.02327861617202e-23	TPTEP1	chr22	+	16601887	16698742	12081	lincRNA	transmembrane_phosphatase_with_tensin_homology_pseudogene_1
ENSG00000176532	417.117152769254	2.11437967028788	-7.54479123952837	1.97139242946436e-25	1.07830767247335e-23	PRR15	chr7	+	29563811	29567295	1982	protein_coding	proline_rich_15
ENSG00000100461	1687.44175517071	37.9791290776915	-5.46903726469639	2.00918711733878e-25	1.09675586652141e-23	RBM23	chr14	-	22893206	22919184	14022	protein_coding	RNA_binding_motif_protein_23
ENSG00000165300	11.3716180425464	753.166421665866	6.03338491292852	2.2455455232198e-25	1.2233006177605e-23	SLITRK5	chr13	+	87672615	87696272	21103	protein_coding	SLIT_and_NTRK_like_family_member_5
ENSG00000169994	1.89146593041347	415.614900535653	7.68457369958215	2.3226030515959e-25	1.26272810260756e-23	MYO7B	chr2	+	127535802	127637729	8800	protein_coding	myosin_VIIB
ENSG00000095739	6533.63530362198	182.493379855118	-5.16104823312787	2.43102386939958e-25	1.31753335530634e-23	BAMBI	chr10	+	28677342	28682939	2314	protein_coding	BMP_and_activin_membrane-bound_inhibitor
ENSG00000170989	1.38777878078145e-17	323.843080476231	11.3417423999982	2.43806698916362e-25	1.31753335530634e-23	S1PR1	chr1	+	101236888	101241518	3071	protein_coding	sphingosine-1-phosphate_receptor_1
ENSG00000186297	1.38777878078145e-17	323.843080476231	11.3417423999982	2.43806698916362e-25	1.31753335530634e-23	GABRA5	chr15	+	26866363	26949207	4154	protein_coding	gamma-aminobutyric_acid_(GABA)_A_receptor_alpha_5
ENSG00000175906	15.1636435283222	889.241878461426	5.86183919912473	2.46768707574243e-25	1.33087299368941e-23	ARL4D	chr17	+	43398959	43401137	1612	protein_coding	ADP_ribosylation_factor_like_GTPase_4D
ENSG00000118402	29.3837161962256	1357.59461325168	5.52368961666008	3.01155660104549e-25	1.62095080446692e-23	ELOVL4	chr6	-	79914812	79947580	3042	protein_coding	ELOVL_fatty_acid_elongase_4
ENSG00000279377	1.38777878078145e-17	319.623686444755	11.3228288762433	3.22409227311836e-25	1.73188988519741e-23	AC003973.3	chr19	-	21965708	21968529	2822	TEC	NA
ENSG00000134013	54.0318190672531	2183.54098984124	5.33335039174892	3.36617842863236e-25	1.80461963233599e-23	LOXL2	chr8	-	23297189	23425328	5707	protein_coding	lysyl_oxidase_like_2
ENSG00000166313	16.1116492227514	909.284000001255	5.8072199712148	3.58244139734813e-25	1.91674830795416e-23	APBB1	chr11	-	6395124	6419414	5244	protein_coding	amyloid_beta_(A4)_precursor_protein-binding_family_B_member_1_(Fe65)
ENSG00000150782	90.0559574022609	3353.36797770366	5.2166288515785	3.91134068114062e-25	2.08857847143838e-23	IL18	chr11	-	112143251	112164117	2628	protein_coding	interleukin_18
ENSG00000179456	7.57958445112432	593.884297736232	6.26781456181116	3.99624102943176e-25	2.12969635572444e-23	ZBTB18	chr1	+	244048939	244057476	3906	protein_coding	zinc_finger_and_BTB_domain_containing_18
ENSG00000140678	1.38777878078145e-17	314.349443904494	11.2988328628826	4.59243966028899e-25	2.44259818302471e-23	ITGAX	chr16	+	31355134	31382997	7074	protein_coding	integrin_subunit_alpha_X
ENSG00000154639	16.1116492227514	896.625817976194	5.78699773872245	5.00572306881413e-25	2.65717181641027e-23	CXADR	chr21	+	17512382	17593579	6682	protein_coding	coxsackie_virus_and_adenovirus_receptor
ENSG00000260328	1.38777878078145e-17	311.184898379831	11.2842413101859	5.69219773023937e-25	3.00972164693401e-23	RP11-416I2.1	chr17	-	17011914	17014990	3077	lincRNA	NA
ENSG00000172346	1.38777878078145e-17	311.184898379831	11.2842413101859	5.69219773023937e-25	3.00972164693401e-23	CSDC2	chr22	+	41560763	41577741	3250	protein_coding	cold_shock_domain_containing_C2_RNA_binding
ENSG00000172379	546.045620422078	5.2788609071888	-6.66050948306796	6.05602163715498e-25	3.19582542989278e-23	ARNT2	chr15	+	80404350	80597937	7741	protein_coding	aryl_hydrocarbon_receptor_nuclear_translocator_2
ENSG00000139737	1.38777878078145e-17	309.075201363171	11.2744309689414	7.06845416889486e-25	3.72281123278162e-23	SLAIN1	chr13	+	77697854	77764242	4133	protein_coding	SLAIN_motif_family_member_1
ENSG00000135926	36.9677493890957	1564.34491954543	5.39822490407827	7.42945763422037e-25	3.90531685310695e-23	TMBIM1	chr2	-	218274192	218292586	5098	protein_coding	transmembrane_BAX_inhibitor_motif_containing_1
ENSG00000147573	1.89146593041347	393.463081918768	7.60557808723455	7.99637638807387e-25	4.19514174476264e-23	TRIM55	chr8	+	66126896	66175487	3081	protein_coding	tripartite_motif_containing_55
ENSG00000117595	305.252746481621	1.38777878078145e-17	-11.2565266449151	8.17478958644117e-25	4.28041506772762e-23	IRF6	chr1	-	209785623	209806175	4915	protein_coding	interferon_regulatory_factor_6
ENSG00000013297	1.89146593041347	392.40823341296	7.60170630803294	8.47111883151227e-25	4.42698043431318e-23	CLDN11	chr3	+	170418865	170860380	6032	protein_coding	claudin_11
ENSG00000067445	2.83950028546094	430.382779608626	7.17998391083777	8.68867842040463e-25	4.53189366121144e-23	TRO	chrX	+	54920462	54931431	6716	protein_coding	trophinin
ENSG00000142552	10.4236106947186	674.052783967181	5.99741296082452	9.51683884979313e-25	4.95426788462397e-23	RCN3	chr19	+	49527618	49546962	2093	protein_coding	reticulocalbin_3
ENSG00000185442	1989.854850326	50.6373120480307	-5.29299060502015	9.74144431183771e-25	5.06142172086735e-23	FAM174B	chr15	-	92617443	92809884	4657	protein_coding	family_with_sequence_similarity_174_member_B
ENSG00000115705	301.460732693835	1.38777878078145e-17	-11.2385001395263	1.09621094210355e-24	5.68469697399313e-23	TPO	chr2	+	1374223	1543711	6841	protein_coding	thyroid_peroxidase
ENSG00000179178	346.016894624318	1.05955866386509	-8.19685321864385	1.10911387159052e-24	5.74056903288097e-23	TMEM125	chr1	+	43269994	43274002	2127	protein_coding	transmembrane_protein_125
ENSG00000143578	2542.54085173436	68.569737855309	-5.21010088954988	1.15114678752219e-24	5.94670963071327e-23	CREB3L4	chr1	+	153967534	153974363	2904	protein_coding	cAMP_responsive_element_binding_protein_3-like_4
ENSG00000061455	385.833039215927	2.11437967028788	-7.43235150377455	1.20074654134013e-24	6.19107671773955e-23	PRDM6	chr5	+	123089121	123194266	9350	protein_coding	PR_domain_containing_6
ENSG00000145103	344.120887736676	1.05955866386509	-8.1889291692223	1.26296027932053e-24	6.49942497941935e-23	ILDR1	chr3	-	121987323	122022204	2953	protein_coding	immunoglobulin-like_domain_containing_receptor_1
ENSG00000167785	299.564725799424	1.38777878078145e-17	-11.2294017115439	1.27106667519982e-24	6.52868265970254e-23	ZNF558	chr19	-	8806170	8832328	8184	protein_coding	zinc_finger_protein_558
ENSG00000111319	1903.58653791926	48.5276148813543	-5.29029810734355	1.29789647044548e-24	6.6538167722496e-23	SCNN1A	chr12	-	6346843	6377730	5876	protein_coding	sodium_channel_non_voltage_gated_1_alpha_subunit
ENSG00000145908	0.943449169558452	344.940050624613	8.32928925750601	1.3480523789719e-24	6.89783310272414e-23	ZNF300	chr5	-	150894392	150904983	4411	protein_coding	zinc_finger_protein_300
ENSG00000182247	15.1636435283222	827.005816832206	5.75717546004409	1.35651379755601e-24	6.92798315623019e-23	UBE2E2	chr3	+	23203020	23591793	3274	protein_coding	ubiquitin_conjugating_enzyme_E2E_2
ENSG00000185070	1.38777878078145e-17	299.581564785954	11.2294396907226	1.36914280754549e-24	6.97926369532546e-23	FLRT2	chr14	+	85530144	85654426	34899	protein_coding	fibronectin_leucine_rich_transmembrane_protein_2
ENSG00000170456	44.5517809653487	1742.61431628465	5.28554808684393	1.38979670264035e-24	7.07118073271691e-23	DENND5B	chr12	-	31382223	31591097	11310	protein_coding	DENN/MADD_domain_containing_5B
ENSG00000203635	297.668718904659	1.38777878078145e-17	-11.2202455395148	1.47511361308306e-24	7.49113252173218e-23	AC144450.2	chr2	-	1620510	1625419	1641	lincRNA	NA
ENSG00000229251	1.38777878078145e-17	297.471867768274	11.2192481850589	1.58964106751499e-24	8.05756786214458e-23	HNRNPA1P8	chr7	+	84983556	84984506	951	processed_pseudogene	heterogeneous_nuclear_ribonucleoprotein_A1_pseudogene_8
ENSG00000039560	205.712383898306	6704.62166586464	5.02557554604343	1.63273806416644e-24	8.26049055127811e-23	RAI14	chr5	+	34656237	34832627	7687	protein_coding	retinoic_acid_induced_14
ENSG00000091136	78.6799143970564	2779.53039304844	5.14039739770986	1.69913031722431e-24	8.58028991278476e-23	LAMB1	chr7	-	107923799	108003255	8140	protein_coding	laminin_subunit_beta_1
ENSG00000007237	1.89146593041347	380.8048998475	7.55841650287074	1.71043024607814e-24	8.62120785340995e-23	GAS7	chr17	-	9910609	10198551	10100	protein_coding	growth_arrest_specific_7
ENSG00000180155	520.449527610326	5.2788609071888	-6.59126303585755	1.84678236965801e-24	9.25920099455834e-23	LYNX1	chr8	-	142764334	142778224	6039	protein_coding	Ly6/neurotoxin_1
ENSG00000184905	1.38777878078145e-17	295.362170750398	11.2089841719122	1.84730777092353e-24	9.25920099455834e-23	TCEAL2	chrX	+	102125688	102127711	1666	protein_coding	transcription_elongation_factor_A_(SII)-like_2
ENSG00000182632	1.38777878078145e-17	295.362170750398	11.2089841719122	1.84730777092353e-24	9.25920099455834e-23	CCNYL2	chr10	-	42409727	42454385	1440	translated_unprocessed_pseudogene	cyclin_Y-like_2_pseudogene
ENSG00000169946	0.943449169558452	339.665808088848	8.30706741382793	1.87245167703305e-24	9.3678166832789e-23	ZFPM2	chr8	+	104590733	105804532	7775	protein_coding	zinc_finger_protein_FOG_family_member_2
ENSG00000196440	1.89146593041347	378.695202835277	7.55040414347585	1.92668293475416e-24	9.62128370714458e-23	ARMCX4	chrX	+	101418287	101533459	13351	protein_coding	armadillo_repeat_containing_X-linked_4
ENSG00000179542	2.83950028546094	415.614900535653	7.1296252517542	1.94463169981219e-24	9.69296458727087e-23	SLITRK4	chrX	-	143622790	143635777	8914	protein_coding	SLIT_and_NTRK_like_family_member_4
ENSG00000175556	1.38777878078145e-17	294.307322241385	11.2038246511833	1.99208110720278e-24	9.9111548222934e-23	LONRF3	chrX	+	118974614	119018355	4041	protein_coding	LON_peptidase_N-terminal_domain_and_ring_finger_3
ENSG00000152495	0.943449169558452	338.610959581593	8.30258167386534	2.00068098574025e-24	9.935610213899e-23	CAMK4	chr5	+	111223653	111494886	13910	protein_coding	calcium/calmodulin-dependent_protein_kinase_IV
ENSG00000103544	1000.13926588275	21.1015533357814	-5.55869693307705	2.02560201608689e-24	1.00408794054778e-22	C16orf62	chr16	+	19555240	19706793	9767	protein_coding	chromosome_16_open_reading_frame_62
ENSG00000138061	5301.2308411019	161.396409434414	-5.03660778491356	2.27450426479456e-24	1.12539966980642e-22	CYP1B1	chr2	-	38066973	38109902	6014	protein_coding	cytochrome_P450_family_1_subfamily_B_member_1
ENSG00000147642	2647.76923278382	74.8988292543413	-5.14144666846896	2.3779012139531e-24	1.17440447134541e-22	SYBU	chr8	-	109573978	109691791	7024	protein_coding	syntabulin
ENSG00000185432	1419.15678355904	34.8145833807673	-5.34435567371911	2.64232628963605e-24	1.30261372443009e-22	METTL7A	chr12	+	50923472	50932517	4083	protein_coding	methyltransferase_like_7A
ENSG00000249395	289.136687873659	1.38777878078145e-17	-11.1783080667383	2.70007930514009e-24	1.3262356747251e-22	CASC9	chr8	-	75223404	75324741	1473	lincRNA	cancer_susceptibility_candidate_9_(non-protein_coding)
ENSG00000127920	1.38777878078145e-17	291.142776714039	11.1882344442457	2.70007930514009e-24	1.3262356747251e-22	GNG11	chr7	+	93921699	93928610	3055	protein_coding	guanine_nucleotide_binding_protein_(G_protein)_gamma_11
ENSG00000183876	1.38777878078145e-17	290.087928204821	11.1830000441438	2.91505377210987e-24	1.42922436397663e-22	ARSI	chr5	-	150296343	150339307	3269	protein_coding	arylsulfatase_family_member_I
ENSG00000176014	539.409596360924	16578.0036363724	4.9414102910394	2.95643803836133e-24	1.4468839953258e-22	TUBB6	chr18	+	12307669	12344320	4117	protein_coding	tubulin_beta_6_class_V
ENSG00000261068	286.292677528262	1.38777878078145e-17	-11.1640535577898	3.40011996155839e-24	1.66100787832216e-22	RP11-7K24.3	chr6	-	42092233	42094259	2027	lincRNA	NA
ENSG00000255026	8.5275940924434	572.787327669029	6.04831591521932	3.48713362580634e-24	1.70043481651888e-22	RP11-326C3.2	chr11	+	287305	288987	860	antisense	NA
ENSG00000172123	1.38777878078145e-17	285.868534167414	11.1618704360297	3.96968678428596e-24	1.932248625001e-22	SLFN12	chr17	-	35411060	35433283	3560	protein_coding	schlafen_family_member_12
ENSG00000136999	2.83950028546094	402.956718470021	7.08501586740965	3.99448446471765e-24	1.94081564100137e-22	NOV	chr8	+	119416306	119424353	2673	protein_coding	nephroblastoma_overexpressed
ENSG00000132359	185.804311123774	5848.0846829418	4.97513527031985	4.18914927212582e-24	2.03173739698102e-22	RAP1GAP2	chr17	+	2777056	3037739	7350	protein_coding	RAP1_GTPase_activating_protein_2
ENSG00000130545	468.309338506764	4.22402546552972	-6.75262005558847	4.29928720092873e-24	2.08141074793975e-22	CRB3	chr19	+	6463777	6467221	1592	protein_coding	crumbs_family_member_3
ENSG00000160190	1506.37309942513	39.0339776509311	-5.26589136192595	4.51877472825174e-24	2.18375052548452e-22	SLC37A1	chr21	+	42496008	42581440	6814	protein_coding	solute_carrier_family_37_(glucose-6-phosphate_transporter)_member_1
ENSG00000160951	5.68356074469745	467.30247727628	6.32934016877596	4.73755375711789e-24	2.28538237235136e-22	PTGER1	chr19	-	14472466	14475362	1421	protein_coding	prostaglandin_E_receptor_1
ENSG00000112238	1.38777878078145e-17	282.703988638787	11.1458176337216	5.01692321466924e-24	2.41582770369234e-22	PRDM13	chr6	+	99606730	99615578	3276	protein_coding	PR_domain_containing_13
ENSG00000162631	0.943449169558452	323.843080476231	8.23827127568061	5.52192759368754e-24	2.65426558808161e-22	NTNG1	chr1	+	107140007	107483458	9138	protein_coding	netrin_G1
ENSG00000148677	3.7875259485201	395.572778930315	6.65854914265995	5.93742601238197e-24	2.84890800444648e-22	ANKRD1	chr10	-	90912096	90921276	1979	protein_coding	ankyrin_repeat_domain_1_(cardiac_muscle)
ENSG00000091947	526.137548236222	6.33370047263656	-6.34947624063943	5.96252948820512e-24	2.85587158399537e-22	TMEM101	chr17	-	44011188	44023946	3029	protein_coding	transmembrane_protein_101
ENSG00000111341	278.708649936031	1.38777878078145e-17	-11.1253382713163	6.3544861322905e-24	3.03821051495294e-22	MGP	chr12	-	14881181	14885926	2639	protein_coding	matrix_Gla_protein
ENSG00000177707	44.5517809653487	1631.8552236373	5.19081461033462	6.43469905420587e-24	3.07111672027815e-22	PVRL3	chr3	+	111070071	111275563	6184	protein_coding	poliovirus_receptor-related_3
ENSG00000077935	6.63157350604578	493.673689885013	6.19056147093531	6.50442913582116e-24	3.09891229817232e-22	SMC1B	chr22	-	45344063	45413619	4253	protein_coding	structural_maintenance_of_chromosomes_1B
ENSG00000106804	617.1458781773	9.49823147579758	-6.00396398274478	6.74251879599791e-24	3.20668010322539e-22	C5	chr9	-	120952335	121050276	6533	protein_coding	complement_component_5
ENSG00000143126	35881.925572297	1238.39673257119	-4.8565769745447	7.60129583898588e-24	3.60874196468474e-22	CELSR2	chr1	+	109250019	109275750	12349	protein_coding	cadherin_EGF_LAG_seven-pass_G-type_receptor_2
ENSG00000159166	1645.72960411096	44.3082205480991	-5.21121263977588	7.86861868946644e-24	3.72908913146137e-22	LAD1	chr1	-	201373244	201399915	3482	protein_coding	ladinin_1
ENSG00000214189	4.73554534719345	424.053688577805	6.44611999740388	8.22129254702999e-24	3.88939254075808e-22	ZNF788	chr19	+	12092263	12137235	7434	protein_coding	zinc_finger_family_member_788
ENSG00000086506	3.7875259485201	389.243687895396	6.63528676332647	8.38198549366371e-24	3.95846971667488e-22	HBQ1	chr16	+	180453	181181	536	protein_coding	hemoglobin_subunit_theta_1
ENSG00000214530	14725.332965421	500.00278090992	-4.87988611435731	8.48607170362709e-24	4.00061904825189e-22	STARD10	chr11	-	72754729	72794168	4197	protein_coding	StAR_related_lipid_transfer_domain_containing_10
ENSG00000081853	273.968632687384	1.38777878078145e-17	-11.1006027823585	8.73907913231797e-24	4.11270519864025e-22	PCDHGA2	chr5	+	141338760	141512979	6724	protein_coding	protocadherin_gamma_subfamily_A_2
ENSG00000147257	5.68356074469745	453.589446716282	6.28638177721173	9.44772745288586e-24	4.43845676819721e-22	GPC3	chrX	-	133535745	133985895	2711	protein_coding	glypican_3
ENSG00000140937	1.38777878078145e-17	274.265200559926	11.1021158475716	9.46977136746166e-24	4.44107573382559e-22	CDH11	chr16	-	64943753	65126112	13381	protein_coding	cadherin_11_type_2_OB-cadherin_(osteoblast)
ENSG00000173482	124.184084606024	3887.12131930032	4.96669452595988	1.03035956814745e-23	4.82372849212917e-22	PTPRM	chr18	+	7566782	8406861	9900	protein_coding	protein_tyrosine_phosphatase_receptor_type_M
ENSG00000125730	1539.55321958979	41.1436748049736	-5.22160831867336	1.04182022668846e-23	4.86252738766695e-22	C3	chr19	-	6677704	6730562	8328	protein_coding	complement_component_3
ENSG00000230487	1740.52994742703	48.5276148813543	-5.16111375852702	1.0422535155646e-23	4.86252738766695e-22	PSMG3-AS1	chr7	+	1570073	1589626	6355	lincRNA	PSMG3_antisense_RNA_1_(head_to_head)
ENSG00000226167	349.808908398904	2.11437967028788	-7.29099157308108	1.08586742384271e-23	5.04855541975805e-22	AP4B1-AS1	chr1	+	113856635	113901237	1734	antisense	AP4B1_antisense_RNA_1
ENSG00000112276	6.63157350604578	483.125204842509	6.15940850201931	1.08587189181179e-23	5.04855541975805e-22	BVES	chr6	-	105096822	105137174	5808	protein_coding	blood_vessel_epicardial_substance
ENSG00000196954	23.6956895133084	989.452486153261	5.37626318601692	1.08838445121188e-23	5.05152755789667e-22	CASP4	chr11	-	104942866	104969436	7256	protein_coding	caspase_4
ENSG00000261377	0.943449169558452	312.239746888095	8.18565045296263	1.19453828421174e-23	5.53469405018108e-22	PDCD6IPP2	chr15	+	28789664	28859007	5244	transcribed_unprocessed_pseudogene	PDCD6IP_pseudogene_2
ENSG00000115598	1.38777878078145e-17	271.100655029363	11.0853802448458	1.30908081476164e-23	6.05500398814105e-22	IL1RL2	chr2	+	102186973	102240002	2644	protein_coding	interleukin_1_receptor-like_2
ENSG00000121005	3.7875259485201	381.859748353574	6.60766458765593	1.3374497334386e-23	6.17562834107965e-22	CRISPLD1	chr8	+	74984515	75034558	4543	protein_coding	cysteine-rich_secretory_protein_LCCL_domain_containing_1
ENSG00000176563	7.57958445112432	506.331871934401	6.03776646629253	1.50364936613791e-23	6.93118099269655e-22	CNTD1	chr17	+	42798792	42811587	3378	protein_coding	cyclin_N-terminal_domain_containing_1
ENSG00000253313	266.384605083546	1.38777878078145e-17	-11.0601221243582	1.67357708646025e-23	7.70131053131178e-22	C1orf210	chr1	-	43281883	43285617	1516	protein_coding	chromosome_1_open_reading_frame_210
ENSG00000214049	10.4236106947186	593.884297736232	5.81476800933296	1.73169270799893e-23	7.9551661948721e-22	UCA1	chr19	+	15828961	15836320	2299	processed_transcript	urothelial_cancer_associated_1_(non-protein_coding)
ENSG00000205413	1.89146593041347	342.830353610408	7.40690974844462	1.82067708352919e-23	8.34972418953201e-22	SAMD9	chr7	-	93099513	93118023	6855	protein_coding	sterile_alpha_motif_domain_containing_9
ENSG00000130818	7.57958445112432	501.057629414029	6.02266331675865	1.97107248229817e-23	9.02229222010096e-22	ZNF426	chr19	-	9523224	9538627	7527	protein_coding	zinc_finger_protein_426
ENSG00000165152	1.38777878078145e-17	265.826412477156	11.0570487929211	1.97402373724674e-23	9.02229222010096e-22	TMEM246	chr9	-	101473171	101533537	5568	protein_coding	transmembrane_protein_246
ENSG00000267280	1073.13553029859	26.3757952266003	-5.34008567466673	2.10091630455673e-23	9.58600830265257e-22	TBX2-AS1	chr17	-	61393456	61411555	1206	antisense	TBX2_antisense_RNA_1
ENSG00000272763	1.38777878078145e-17	263.716715455814	11.0455585711023	2.33096646655235e-23	1.06177097528802e-21	RP11-357H14.17	chr17	-	48635923	48647023	1596	lincRNA	NA
ENSG00000054179	337.484863628034	2.11437967028788	-7.23926678964137	2.36714341572603e-23	1.07643152358294e-21	ENTPD2	chr9	-	137048098	137054045	2633	protein_coding	ectonucleoside_triphosphate_diphosphohydrolase_2
ENSG00000175592	115.65205298594	3502.10161637091	4.9187970453298	2.3777812221234e-23	1.07944862686498e-21	FOSL1	chr11	-	65892049	65900573	1887	protein_coding	FOS-like_antigen_1
ENSG00000111716	513.813503545966	14433.4966335983	4.81168158238764	2.43307150296056e-23	1.10269254031655e-21	LDHB	chr12	-	21635342	21757857	2983	protein_coding	lactate_dehydrogenase_B
ENSG00000237330	335.588856739293	2.11437967028788	-7.23114192225994	2.70191785454162e-23	1.22248182660351e-21	RNF223	chr1	-	1070966	1074307	1902	protein_coding	ring_finger_protein_223
ENSG00000115935	3.7875259485201	369.201566278983	6.55904597592232	2.74133200511936e-23	1.23823716666748e-21	WIPF1	chr2	-	174559572	174682916	9121	protein_coding	WAS/WASL_interacting_protein_family_member_1
ENSG00000257151	0.943449169558452	300.636413294721	8.13103744765537	2.8508209715196e-23	1.28339296023368e-21	PWAR6	chr15	+	25031873	25036490	4618	lincRNA	Prader_Willi/Angelman_region_RNA_6
ENSG00000175707	299.564725799424	1.05955866386509	-7.98896198139871	2.8508209715196e-23	1.28339296023368e-21	KDF1	chr1	-	26949562	26960406	1793	protein_coding	keratinocyte_differentiation_factor_1
ENSG00000105810	43.603777082189	1498.9443124547	5.09919703430047	3.03094199483852e-23	1.36220636388026e-21	CDK6	chr7	-	92604921	92836594	12260	protein_coding	cyclin-dependent_kinase_6
ENSG00000132429	1.89146593041347	334.391565552221	7.37096612210245	3.08620764116381e-23	1.38473669303866e-21	POPDC3	chr6	-	105158280	105179995	1881	protein_coding	popeye_domain_containing_3
ENSG00000204103	258.80057747178	1.38777878078145e-17	-11.0184727452939	3.26106948167973e-23	1.46076411367069e-21	MAFB	chr20	-	40685848	40689240	3393	protein_coding	v-maf_avian_musculoaponeurotic_fibrosarcoma_oncogene_homolog_B
ENSG00000166770	1.38777878078145e-17	258.442472901264	11.0164261548269	3.54914982458431e-23	1.58717038424114e-21	ZNF667-AS1	chr19	+	56477250	56500666	3629	lincRNA	ZNF667_antisense_RNA_1_(head_to_head)
ENSG00000168685	3.7875259485201	364.982172253258	6.54246872867184	3.71976789050237e-23	1.66071624065045e-21	IL7R	chr5	+	35852695	35879603	6060	protein_coding	interleukin_7_receptor
ENSG00000087510	3972.13002840835	135.025196274332	-4.87737513315106	3.74887718915048e-23	1.67094582285342e-21	TFAP2C	chr20	+	56629302	56639283	3005	protein_coding	transcription_factor_AP-2_gamma_(activating_enhancer_binding_protein_2_gamma)
ENSG00000114251	32.2277288921922	1180.38006497947	5.1891794703347	4.07780871211399e-23	1.81455758631792e-21	WNT5A	chr3	-	55465715	55490539	7531	protein_coding	wingless-type_MMTV_integration_site_family_member_5A
ENSG00000123977	1.38777878078145e-17	256.332775878949	11.0046064516479	4.20754439339111e-23	1.86920332969003e-21	DAW1	chr2	+	227871054	227924344	2933	protein_coding	dynein_assembly_factor_with_WDR_repeat_domains_1
ENSG00000174808	597.237806012993	10.5530773088976	-5.80653834926534	4.33786474553816e-23	1.92392863039773e-21	BTC	chr4	-	74744759	74794686	2816	protein_coding	betacellulin
ENSG00000175040	0.943449169558452	294.307322241385	8.10035352686572	4.45554419733087e-23	1.97287692652257e-21	CHST2	chr3	+	143119331	143124014	4582	protein_coding	carbohydrate_(N-acetylglucosamine-6-O)_sulfotransferase_2
ENSG00000171557	254.060560210101	1.38777878078145e-17	-10.9918177701195	4.58321799994387e-23	2.02608289486043e-21	FGG	chr4	-	154604134	154612967	3600	protein_coding	fibrinogen_gamma_chain
ENSG00000114861	2486.60864919376	80.1730720619615	-4.95283084973008	4.82508591254762e-23	2.12951336690277e-21	FOXP1	chr3	-	70954693	71583989	13628	protein_coding	forkhead_box_P1
ENSG00000169860	5.68356074469745	421.943991567382	6.18207488503966	4.93463205888513e-23	2.17430209313556e-21	P2RY1	chr3	+	152834693	152841439	6747	protein_coding	purinergic_receptor_P2Y_G-protein_coupled_1
ENSG00000144290	252.164553304448	1.38777878078145e-17	-10.9810163418261	5.44299239847905e-23	2.3943838991417e-21	SLC4A10	chr2	+	161424332	161985282	7550	protein_coding	solute_carrier_family_4_sodium_bicarbonate_transporter_member_10
ENSG00000135919	39.8117613778941	1351.26552224233	5.08042650703775	5.66095740973546e-23	2.48621136011281e-21	SERPINE2	chr2	-	223975112	224039319	8891	protein_coding	serpin_peptidase_inhibitor_clade_E_(nexin_plasminogen_activator_inhibitor_type_1)_member_2
ENSG00000198768	2.83950028546094	356.543384200433	6.90852463305347	6.10976410215736e-23	2.67895770371993e-21	APCDD1L	chr20	-	58459101	58515131	3942	protein_coding	adenomatosis_polyposis_coli_down-regulated_1-like
ENSG00000204264	1.89146593041347	323.843080476231	7.32473947263526	6.49642944620719e-23	2.83394827188501e-21	PSMB8	chr6	-	32840717	32844703	2006	protein_coding	proteasome_subunit_beta_8
ENSG00000198286	0.943449169558452	290.087928204821	8.07952891982622	6.50426747263685e-23	2.83394827188501e-21	CARD11	chr7	-	2906141	3043945	4707	protein_coding	caspase_recruitment_domain_family_member_11
ENSG00000081985	0.943449169558452	290.087928204821	8.07952891982622	6.50426747263685e-23	2.83394827188501e-21	IL12RB2	chr1	+	67307364	67396900	4233	protein_coding	interleukin_12_receptor_subunit_beta_2
ENSG00000205890	354.548925615866	3.16919693313913	-6.75255626043261	6.50528065080777e-23	2.83394827188501e-21	RP11-473M20.5	chr16	+	3032481	3039133	3061	antisense	NA
ENSG00000147231	0.943449169558452	289.033079695549	8.07427545904604	7.020343557241e-23	3.04847961939711e-21	CXorf57	chrX	+	106611930	106679442	4853	protein_coding	chromosome_X_open_reading_frame_57
ENSG00000170745	287.240680976827	1.05955866386509	-7.92838099679672	7.020343557241e-23	3.04847961939711e-21	KCNS3	chr2	+	17877847	18361616	3131	protein_coding	potassium_voltage-gated_channel_modifier_subfamily_S_member_3
ENSG00000236333	1.38777878078145e-17	251.058533321874	10.9746264632763	7.06010038393492e-23	3.06081458124098e-21	TRHDE-AS1	chr12	-	72253508	72274907	8781	processed_transcript	TRHDE_antisense_RNA_1
ENSG00000133256	4.73554534719345	383.969445365645	6.30290726617177	7.67008056793555e-23	3.31992604486276e-21	PDE6B	chr4	+	625584	670782	5086	protein_coding	phosphodiesterase_6B
ENSG00000198797	248.372539491392	1.38777878078145e-17	-10.9591678050969	7.70427012699464e-23	3.32938058084195e-21	BRINP2	chr1	+	177171497	177282422	3953	protein_coding	bone_morphogenetic_protein/retinoic_acid_inducible_neural-specific_2
ENSG00000134531	177.272279890703	4945.13436596245	4.8009549768662	7.93592157026337e-23	3.42400097701955e-21	EMP1	chr12	+	13196716	13219939	7838	protein_coding	epithelial_membrane_protein_1
ENSG00000223784	1.38777878078145e-17	248.948836298511	10.9624578250797	8.40978936939345e-23	3.62265782963361e-21	RP11-554I8.2	chr10	+	6737382	6739026	917	lincRNA	NA
ENSG00000139865	437.973228450302	5.2788609071888	-6.34241487812169	8.96117592330743e-23	3.8540202543526e-21	TTC6	chr14	+	37595847	38041442	8361	protein_coding	tetratricopeptide_repeat_domain_6
ENSG00000187122	848.458716392867	21.1015533357814	-5.32144570572448	8.97673451897776e-23	3.85456406112666e-21	SLIT1	chr10	-	96998038	97185920	9103	protein_coding	slit_guidance_ligand_1
ENSG00000104368	18.007660057365	768.989149202879	5.40619000900924	9.20031511975009e-23	3.9442877189059e-21	PLAT	chr8	-	42175233	42207724	6618	protein_coding	plasminogen_activator_tissue
ENSG00000149212	22.747684842905	874.473999431551	5.25665007864536	9.36726750726555e-23	4.00948786668131e-21	SESN3	chr11	-	95165513	95232541	10573	protein_coding	sestrin_3
ENSG00000198046	0.943449169558452	284.813685657927	8.05306819953832	9.55037267132113e-23	4.08138430197853e-21	ZNF667	chr19	-	56439325	56478065	8810	protein_coding	zinc_finger_protein_667
ENSG00000077942	73.9398963366355	2232.06402090033	4.91344069784985	9.72354817203905e-23	4.14881645581021e-21	FBLN1	chr22	+	45502238	45601135	7285	protein_coding	fibulin_1
ENSG00000196917	790.630506873726	18.9918569258258	-5.37068148297972	1.02488589881735e-22	4.36604631082284e-21	HCAR1	chr12	-	122726076	122730843	4768	protein_coding	hydroxycarboxylic_acid_receptor_1
ENSG00000178695	26.539703107702	971.520061620192	5.18719111082005	1.15586346577596e-22	4.91624829938716e-21	KCTD12	chr13	-	76880166	76886390	6225	protein_coding	potassium_channel_tetramerization_domain_containing_12
ENSG00000065675	0.943449169558452	281.649140129133	8.03695563535435	1.20602899238914e-22	5.121539812404e-21	PRKCQ	chr10	-	6427143	6580301	3295	protein_coding	protein_kinase_C_theta
ENSG00000213949	1.89146593041347	313.294595396316	7.27698246396115	1.30354342282223e-22	5.52582191800107e-21	ITGA1	chr5	+	52787896	52959210	18566	protein_coding	integrin_subunit_alpha_1
ENSG00000172818	242.684518767239	1.38777878078145e-17	-10.9257617877569	1.30942676170091e-22	5.52582191800107e-21	OVOL1	chr11	+	65787022	65797219	3849	protein_coding	ovo-like_zinc_finger_1
ENSG00000154655	1.38777878078145e-17	243.674593738714	10.9315794666739	1.30942676170091e-22	5.52582191800107e-21	L3MBTL4	chr18	-	5954706	6415237	7959	protein_coding	l(3)mbt-like_4_(Drosophila)
ENSG00000118946	1.38777878078145e-17	243.674593738714	10.9315794666739	1.30942676170091e-22	5.52582191800107e-21	PCDH17	chr13	+	57631810	57729311	8326	protein_coding	protocadherin_17
ENSG00000105538	27.4877075203187	990.507334655191	5.16471834785877	1.36363328984686e-22	5.74558363968915e-21	RASIP1	chr19	-	48720587	48740721	4149	protein_coding	Ras_interacting_protein_1
ENSG00000100918	61.615848836786	1863.92189394198	4.91596728298117	1.40728346677413e-22	5.92025054056648e-21	REC8	chr14	+	24171853	24180257	3844	protein_coding	REC8_meiotic_recombination_protein
ENSG00000174080	13.2676314239607	620.255510316161	5.53317438621007	1.48302924082204e-22	6.22918481433132e-21	CTSF	chr11	-	66563463	66568841	2896	protein_coding	cathepsin_F
ENSG00000124343	341.276877404767	3.16919693313913	-6.6975346417268	1.49198700573684e-22	6.2570640119284e-21	XG	chrX	+	2752050	2815927	2774	protein_coding	Xg_blood_group
ENSG00000196754	29.3837161962256	1037.97551724037	5.1364486249811	1.51916127791213e-22	6.3611340093445e-21	S100A2	chr1	-	153561108	153567890	1567	protein_coding	S100_calcium_binding_protein_A2
ENSG00000162777	1164.14385994244	33.7597348255035	-5.10285284925574	1.5433724816703e-22	6.45249338615834e-21	DENND2D	chr1	-	111187174	111204535	5515	protein_coding	DENN/MADD_domain_containing_2D
ENSG00000240225	1.38777878078145e-17	241.564896714219	10.9190406644695	1.56662176220398e-22	6.53955455721247e-21	ZNF542P	chr19	+	56368099	56379828	4690	transcribed_unprocessed_pseudogene	zinc_finger_protein_542_pseudogene
ENSG00000175920	3046.87867801077	107.599134354785	-4.82204362833786	1.58507996114036e-22	6.60637808842521e-21	DOK7	chr4	+	3463311	3501473	4031	protein_coding	docking_protein_7
ENSG00000196549	26.539703107702	957.80703109456	5.16668490550863	1.61141125580551e-22	6.70575863025485e-21	MME	chr3	+	155024124	155183729	9620	protein_coding	membrane_metallo-endopeptidase
ENSG00000145192	0.943449169558452	277.42974608994	8.01518841314788	1.65181917748451e-22	6.86332140832777e-21	AHSG	chr3	+	186612923	186621318	2353	protein_coding	alpha-2-HS-glycoprotein
ENSG00000196632	6.63157350604578	427.218234093298	5.98203157705601	1.66946520849536e-22	6.92596904804399e-21	WNK3	chrX	-	54192823	54358642	11472	protein_coding	WNK_lysine_deficient_protein_kinase_3
ENSG00000187634	747.022348862977	17.9370088411536	-5.37075103591992	1.67883078291665e-22	6.94480572613584e-21	SAMD11	chr1	+	924880	944581	3214	protein_coding	sterile_alpha_motif_domain_containing_11
ENSG00000185499	3166.32711054538	112.873377055392	-4.80855604942455	1.67915646867929e-22	6.94480572613584e-21	MUC1	chr1	-	155185824	155192916	4717	protein_coding	mucin_1_cell_surface_associated
ENSG00000163071	239.840508403008	1.38777878078145e-17	-10.9087641565619	1.71441626807227e-22	7.06895245945518e-21	SPATA18	chr4	+	52051331	52097292	4941	protein_coding	spermatogenesis_associated_18
ENSG00000228613	239.840508403008	1.38777878078145e-17	-10.9087641565619	1.71441626807227e-22	7.06895245945518e-21	AC144450.1	chr2	-	1546665	1620113	786	antisense	NA
ENSG00000234745	153.572192950365	4175.09496011881	4.76364855007284	1.72939573162247e-22	7.11982981663078e-21	HLA-B	chr6	-	31353872	31357188	3012	protein_coding	major_histocompatibility_complex_class_I_B
ENSG00000131669	4072.61839228036	149.793075665394	-4.76380202280807	1.99411234435578e-22	8.19713924967956e-21	NINJ1	chr9	-	93121489	93134288	2648	protein_coding	ninjurin_1
ENSG00000169252	0.943449169558452	274.265200559926	7.99864472325402	2.09679443796819e-22	8.60611245270171e-21	ADRB2	chr5	+	148825245	148828687	3443	protein_coding	adrenoceptor_beta_2
ENSG00000159164	3.7875259485201	336.501262566978	6.42529486108265	2.20937937889909e-22	9.05442619018131e-21	SV2A	chr1	-	149903318	149917882	4824	protein_coding	synaptic_vesicle_glycoprotein_2A
ENSG00000114854	7.57958445112432	449.370052697302	5.86563056268902	2.23270441359178e-22	9.13613159589013e-21	TNNC1	chr3	-	52451102	52454070	1168	protein_coding	troponin_C_type_1_(slow)
ENSG00000157992	304.304743034803	2.11437967028788	-7.09002100245746	2.3083363778827e-22	9.41703460907487e-21	KRTCAP3	chr2	+	27442366	27446481	1403	protein_coding	keratinocyte_associated_protein_3
ENSG00000113430	304.304743034803	2.11437967028788	-7.09002100245746	2.3083363778827e-22	9.41703460907487e-21	IRX4	chr5	-	1877413	1887236	2815	protein_coding	iroquois_homeobox_4
ENSG00000135773	234.152487669985	1.38777878078145e-17	-10.8741560423691	2.70411139006127e-22	1.10149649160713e-20	CAPN9	chr1	+	230747384	230802003	2593	protein_coding	calpain_9
ENSG00000140323	16.1116492227514	680.381874984014	5.38889788153085	2.81778230270145e-22	1.14606813838081e-20	DISP2	chr15	+	40358235	40378639	12754	protein_coding	dispatched_homolog_2_(Drosophila)
ENSG00000111186	1.89146593041347	302.746110312112	7.22759028970618	2.86975984107896e-22	1.16545096196589e-20	WNT5B	chr12	+	1529891	1647243	4305	protein_coding	wingless-type_MMTV_integration_site_family_member_5B
ENSG00000179403	469.257341945602	7.38854262067175	-5.96605763271759	2.99391142109126e-22	1.2140423365586e-20	VWA1	chr1	+	1434861	1442882	5065	protein_coding	von_Willebrand_factor_A_domain_containing_1
ENSG00000180011	1130.01573632801	33.7597348255035	-5.05993119563317	3.04085326066867e-22	1.23122596136924e-20	ZADH2	chr18	-	75195108	75209348	8157	protein_coding	zinc_binding_alcohol_dehydrogenase_domain_containing_2
ENSG00000197106	1.89146593041347	301.69126180344	7.22255677877947	3.08705790678762e-22	1.24806002270517e-20	SLC6A17	chr1	+	110150486	110202202	6644	protein_coding	solute_carrier_family_6_(neutral_amino_acid_transporter)_member_17
ENSG00000138193	14.215637608667	624.474904328562	5.44431418072874	3.32071914197296e-22	1.34051665243178e-20	PLCE1	chr10	+	93993989	94332823	13329	protein_coding	phospholipase_C_epsilon_1
ENSG00000142621	6.63157350604578	414.560052030296	5.93865184863672	3.33494512350969e-22	1.34424708819973e-20	FHAD1	chr1	+	15247272	15400283	12805	protein_coding	forkhead-associated_(FHA)_phosphopeptide_binding_domain_1
ENSG00000161405	5.68356074469745	387.133990883568	6.05789331258366	3.44270386534939e-22	1.38561123034346e-20	IKZF3	chr17	-	39757715	39864188	10008	protein_coding	IKAROS_family_zinc_finger_3
ENSG00000228623	1.38777878078145e-17	233.126108612764	10.8677664075328	3.56883005754445e-22	1.43423355188888e-20	ZNF883	chr9	-	112997120	113050043	2447	lincRNA	zinc_finger_protein_883
ENSG00000047230	1958.57073703599	67.5148892855227	-4.85597987360975	3.66049615378264e-22	1.46846858754713e-20	CTPS2	chrX	-	16588003	16712936	5510	protein_coding	CTP_synthase_2
ENSG00000170500	1614.44549081539	53.801857795042	-4.90413378652948	3.66490899436038e-22	1.46846858754713e-20	LONRF2	chr2	-	100273291	100322733	13933	protein_coding	LON_peptidase_N-terminal_domain_and_ring_finger_2
ENSG00000272622	266.384605083546	1.05955866386509	-7.81968239421306	3.6913725515868e-22	1.47687762946721e-20	RP11-395N3.2	chr2	+	226800146	226811029	584	lincRNA	NA
ENSG00000197888	230.360473844422	1.38777878078145e-17	-10.8506139669736	3.9173486178515e-22	1.56496626413309e-20	UGT2B17	chr4	-	68537184	68568527	2077	protein_coding	UDP_glucuronosyltransferase_2_family_polypeptide_B17
ENSG00000082269	23.6956895133084	843.883392868139	5.14670665407493	4.22514024323255e-22	1.68472030937843e-20	FAM135A	chr6	+	70412941	70561174	10589	protein_coding	family_with_sequence_similarity_135_member_A
ENSG00000240694	9.47560276457628	489.454295868163	5.67162064881873	4.2296063541096e-22	1.68472030937843e-20	PNMA2	chr8	-	26504686	26514092	5579	protein_coding	paraneoplastic_Ma_antigen_2
ENSG00000277778	2.83950028546094	327.007625999424	6.78381520535589	4.31050751719956e-22	1.71441217859592e-20	PGM5P2	chr9	-	41006999	41074617	1980	lincRNA	phosphoglucomutase_5_pseudogene_2
ENSG00000132321	6.63157350604578	409.28580950321	5.92018478472049	4.37439109835733e-22	1.73725817906191e-20	IQCA1	chr2	-	236324147	236507542	5975	protein_coding	IQ_motif_containing_with_AAA_domain_1
ENSG00000144712	9.47560276457628	487.344598859663	5.66539028744306	4.63730912225952e-22	1.83896584986544e-20	CAND2	chr3	+	12796472	12871916	5478	protein_coding	cullin-associated_and_neddylation-dissociated_2_(putative)
ENSG00000182568	1.38777878078145e-17	229.961563073211	10.8480587975535	4.72476878225348e-22	1.86815417862533e-20	SATB1	chr3	-	18345387	18445588	13409	protein_coding	SATB_homeobox_1
ENSG00000149054	1.38777878078145e-17	229.961563073211	10.8480587975535	4.72476878225348e-22	1.86815417862533e-20	ZNF215	chr11	+	6926404	6984632	4025	protein_coding	zinc_finger_protein_215
ENSG00000174945	788.734500003937	21.1015533357814	-5.21615762052249	4.7695449853548e-22	1.88309736566731e-20	AMZ1	chr7	+	2679522	2775500	7011	protein_coding	archaelysin_family_metallopeptidase_1
ENSG00000078596	1.89146593041347	294.307322241385	7.18682172382037	5.17687293919732e-22	2.03835510214297e-20	ITM2A	chrX	-	79360384	79367667	2051	protein_coding	integral_membrane_protein_2A
ENSG00000137267	43.603777082189	1324.89430970311	4.92114272505039	5.17790271070213e-22	2.03835510214297e-20	TUBB2A	chr6	-	3153669	3157526	1727	protein_coding	tubulin_beta_2A_class_IIa
ENSG00000196132	1.38777878078145e-17	228.906714559835	10.8414293120302	5.19164316785171e-22	2.040784980529e-20	MYT1	chr20	+	64151791	64242253	6265	protein_coding	myelin_transcription_factor_1
ENSG00000154928	8.5275940924434	457.808840735013	5.72513770148012	5.61524576706614e-22	2.20408613325627e-20	EPHB1	chr3	+	134597801	135260467	6956	protein_coding	EPH_receptor_B1
ENSG00000113721	3.7875259485201	322.788231968421	6.3652928170237	5.66027473395867e-22	2.21853151854549e-20	PDGFRB	chr5	-	150113837	150155872	7137	protein_coding	platelet-derived_growth_factor_receptor_beta_polypeptide
ENSG00000164659	4.73554534719345	350.214293159551	6.17019724688513	5.6976045959463e-22	2.22992170586775e-20	KIAA1324L	chr7	-	86876906	87059699	8115	protein_coding	KIAA1324-like
ENSG00000171587	226.568460015864	1.38777878078145e-17	-10.8266813473327	5.70668713291636e-22	2.23023949603221e-20	DSCAM	chr21	-	40010999	40847139	8577	protein_coding	Down_syndrome_cell_adhesion_molecule
ENSG00000116711	0.943449169558452	261.607018434202	7.93050497687901	6.05682107013696e-22	2.36365031805084e-20	PLA2G4A	chr1	+	186828953	186988981	2875	protein_coding	phospholipase_A2_group_IVA
ENSG00000186522	332.744846405702	8233.09714400245	4.62840810562053	6.11072415611215e-22	2.38123970511156e-20	SEPT10	chr2	-	109542982	109614206	4131	protein_coding	septin_10
ENSG00000172061	9.47560276457628	482.070356338188	5.64969564289245	6.1242476541443e-22	2.38306583321292e-20	LRRC15	chr3	-	194355247	194369743	5940	protein_coding	leucine_rich_repeat_containing_15
ENSG00000148120	1409.67674922532	46.4179177142441	-4.9209387157813	6.19684845748196e-22	2.40784172196626e-20	C9orf3	chr9	+	94726701	95087218	10742	protein_coding	chromosome_9_open_reading_frame_3
ENSG00000188761	225.62045655824	1.38777878078145e-17	-10.8206356403133	6.27508226567696e-22	2.431233741038e-20	BCL2L15	chr1	-	113878168	113887547	4251	protein_coding	BCL2-like_15
ENSG00000182732	225.62045655824	1.38777878078145e-17	-10.8206356403133	6.27508226567696e-22	2.431233741038e-20	RGS6	chr14	+	71932439	72566529	8937	protein_coding	regulator_of_G-protein_signaling_6
ENSG00000160117	0.943449169558452	260.552169923293	7.92467868368089	6.58423511885149e-22	2.54735271470515e-20	ANKLE1	chr19	+	17281645	17287646	3569	protein_coding	ankyrin_repeat_and_LEM_domain_containing_1
ENSG00000137501	8010.62465175889	323.843080476231	-4.62803566416929	6.65527507237135e-22	2.57114824644077e-20	SYTL2	chr11	-	85694224	85811159	11258	protein_coding	synaptotagmin_like_2
ENSG00000157851	289.136687873659	2.11437967028788	-7.01628797823949	6.99005678273436e-22	2.69662190562539e-20	DPYSL5	chr2	+	26847747	26950351	7079	protein_coding	dihydropyrimidinase_like_5
ENSG00000269586	1.38777878078145e-17	224.687320505344	10.8146024656219	7.59562166616482e-22	2.92605048356858e-20	CT45A10	chrX	-	135881063	135889086	1012	protein_coding	cancer/testis_antigen_family_45_member_A10
ENSG00000134830	222.776446184167	1.38777878078145e-17	-10.8023450069164	8.36130933412492e-22	3.21183856843323e-20	C5AR2	chr19	+	47332147	47347327	6802	protein_coding	complement_component_5a_receptor_2
ENSG00000090932	1.38777878078145e-17	223.632471991469	10.8078170784501	8.36130933412492e-22	3.21183856843323e-20	DLL3	chr19	+	39498895	39508481	2618	protein_coding	delta-like_3_(Drosophila)
ENSG00000182256	1.89146593041347	287.978231186225	7.15547099521874	8.77664017175999e-22	3.36658433672375e-20	GABRG3	chr15	+	26971282	27541991	12595	protein_coding	gamma-aminobutyric_acid_(GABA)_A_receptor_gamma_3
ENSG00000128422	9.47560276457628	472.5767197987	5.62100771246692	9.34941711339957e-22	3.58119860624905e-20	KRT17	chr17	-	41619437	41624842	2537	protein_coding	keratin_17_type_I
ENSG00000109586	1876.09443836041	67.5148892855227	-4.79391527355339	9.75549294700236e-22	3.73144145828178e-20	GALNT7	chr4	+	173168753	173323967	6865	protein_coding	polypeptide_N-acetylgalactosaminyltransferase_7
ENSG00000123388	1025.7353586016	31.6500377371247	-5.01301875700208	1.00123042132657e-21	3.82424639397909e-20	HOXC11	chr12	+	53973126	53977643	3265	protein_coding	homeobox_C11
ENSG00000189366	284.396670630828	2.11437967028788	-6.99245161194431	1.02265670119797e-21	3.90056019865693e-20	ALG1L	chr3	-	125929275	125937039	843	protein_coding	ALG1_chitobiosyldiphosphodolichol_beta-mannosyltransferase-like
ENSG00000168743	2689.48138382994	102.324891640612	-4.71447403317702	1.05500704440168e-21	4.01826553097963e-20	NPNT	chr4	+	105894775	106004027	6117	protein_coding	nephronectin
ENSG00000198914	1.38777878078145e-17	220.467926449217	10.7872673083259	1.11783603394706e-21	4.25156085915607e-20	POU3F3	chr2	+	104855511	104860471	4961	protein_coding	POU_class_3_homeobox_3
ENSG00000143369	21.7996800907342	759.495512680768	5.11436439180838	1.14848022816955e-21	4.36196025814368e-20	ECM1	chr1	+	150508062	150513789	3360	protein_coding	extracellular_matrix_protein_1
ENSG00000146904	612.405860995773	14.7724653244214	-5.36211503652938	1.22989120234392e-21	4.66459158402338e-20	EPHA1	chr7	-	143390289	143408892	4733	protein_coding	EPH_receptor_A1
ENSG00000180694	9165.29283277034	383.969445365645	-4.57668621651231	1.31089018515689e-21	4.96481246249168e-20	TMEM64	chr8	-	90621995	90791632	5870	protein_coding	transmembrane_protein_64
ENSG00000100033	2055.26708720394	77.0085263800277	-4.73600378532221	1.39838194161818e-21	5.28874718620978e-20	PRODH	chr22	-	18912777	18936553	8776	protein_coding	proline_dehydrogenase_(oxidase)_1
ENSG00000066382	632.313933156392	15.8273130116772	-5.30952905100524	1.4225192616805e-21	5.37250061771379e-20	MPPED2	chr11	-	30384493	30586872	8197	protein_coding	metallophosphoesterase_domain_containing_2
ENSG00000143412	2258.13982186008	85.4473148483846	-4.72200974236322	1.47356439851902e-21	5.55750175810683e-20	ANXA9	chr1	+	150982017	150995634	1826	protein_coding	annexin_A9
ENSG00000140563	4.73554534719345	335.446414059617	6.10806340059962	1.49918575990236e-21	5.64623508401214e-20	MCTP2	chr15	+	94231538	94483952	12978	protein_coding	multiple_C2_domains_transmembrane_2
ENSG00000175356	725.218269852822	20.0467050958546	-5.16860787169048	1.52221465735831e-21	5.72497077410379e-20	SCUBE2	chr11	-	9020391	9138114	7099	protein_coding	signal_peptide_CUB_domain_EGF-like_2
ENSG00000155380	236.996498037273	5718.33831730156	4.59190249312368	1.58840736915856e-21	5.96559792712112e-20	SLC16A1	chr1	-	112911847	112957013	5312	protein_coding	solute_carrier_family_16_(monocarboxylate_transporter)_member_1
ENSG00000159403	28.4357118817862	912.448545507472	4.99761664476333	1.59558261177161e-21	5.9842115033426e-20	C1R	chr12	-	7080209	7092607	5672	protein_coding	complement_component_1_r_subcomponent
ENSG00000007171	3.7875259485201	306.965504346333	6.29280906342452	1.73535462840914e-21	6.49938512634455e-20	NOS2	chr17	-	27756766	27800499	4176	protein_coding	nitric_oxide_synthase_2
ENSG00000164687	41.7077692663269	1203.5867320165	4.84656193093148	1.96203222532765e-21	7.33816379863876e-20	FABP5	chr8	+	81280363	81284777	2077	protein_coding	fatty_acid_binding_protein_5_(psoriasis-associated)
ENSG00000182985	303.356739587899	3.16919693313913	-6.52767557202945	2.00339900192525e-21	7.4825010368305e-20	CADM1	chr11	-	115169218	115504957	11017	protein_coding	cell_adhesion_molecule_1
ENSG00000183668	11.3716180425464	503.167326422213	5.45156887784895	2.14783228615402e-21	8.01084999010088e-20	PSG9	chr19	-	43211791	43269530	5048	protein_coding	pregnancy_specific_beta-1-glycoprotein_9
ENSG00000179981	429.441197491719	7.38854262067175	-5.83817572754776	2.18543836079348e-21	8.13985232557417e-20	TSHZ1	chr18	+	75210755	75289950	8281	protein_coding	teashirt_zinc_finger_homeobox_1
ENSG00000146966	5.68356074469745	355.488535693696	5.93490323656841	2.20310502673572e-21	8.19433519323521e-20	DENND2A	chr7	-	140518420	140673993	5148	protein_coding	DENN/MADD_domain_containing_2A
ENSG00000139910	1.89146593041347	275.320049069991	7.0906485891755	2.22825484696393e-21	8.27646283791037e-20	NOVA1	chr14	-	26443093	26597754	10046	protein_coding	neuro-oncological_ventral_antigen_1
ENSG00000130413	1.38777878078145e-17	212.029138331723	10.7309923591323	2.72728464891892e-21	1.01160877362789e-19	STK33	chr11	-	8391868	8594289	7599	protein_coding	serine/threonine_kinase_33
ENSG00000120875	6964.97686549952	298.526716277138	-4.54363243502404	2.79845938975978e-21	1.03658318549811e-19	DUSP4	chr8	-	29333064	29350668	7257	protein_coding	dual_specificity_phosphatase_4
ENSG00000042062	471.153348823204	9.49823147579758	-5.6146426847454	2.97621587824731e-21	1.10091409290558e-19	FAM65C	chr20	-	50586108	50691528	6009	protein_coding	family_with_sequence_similarity_65_member_C
ENSG00000111224	209.504397746189	1.38777878078145e-17	-10.7137817964957	3.01742131369753e-21	1.10855290388512e-19	PARP11	chr12	-	3791047	3873448	6200	protein_coding	poly(ADP-ribose)_polymerase_family_member_11
ENSG00000153790	1.38777878078145e-17	210.974289816518	10.7238011019035	3.01742131369753e-21	1.10855290388512e-19	C7orf31	chr7	-	25134697	25180356	3837	protein_coding	chromosome_7_open_reading_frame_31
ENSG00000198765	1.38777878078145e-17	210.974289816518	10.7238011019035	3.01742131369753e-21	1.10855290388512e-19	SYCP1	chr1	+	114854803	114995370	4338	protein_coding	synaptonemal_complex_protein_1
ENSG00000127252	1.38777878078145e-17	210.974289816518	10.7238011019035	3.01742131369753e-21	1.10855290388512e-19	HRASLS	chr3	+	193241125	193277738	1169	protein_coding	HRAS-like_suppressor
ENSG00000132639	1.38777878078145e-17	210.974289816518	10.7238011019035	3.01742131369753e-21	1.10855290388512e-19	SNAP25	chr20	+	10218830	10307418	3357	protein_coding	synaptosome_associated_protein_25kDa
ENSG00000136010	73.9398963366355	1919.82886451327	4.69605264143145	3.08111698981546e-21	1.13041361561039e-19	ALDH1L2	chr12	-	105019784	105084577	8507	protein_coding	aldehyde_dehydrogenase_1_family_member_L2
ENSG00000168917	3.7875259485201	298.526716277138	6.2526085403931	3.09800451476943e-21	1.13506507806077e-19	SLC35G2	chr3	+	136818647	136855892	4287	protein_coding	solute_carrier_family_35_member_G2
ENSG00000100100	422.805173411077	7.38854262067175	-5.8157149669321	3.14715037011664e-21	1.15150687761961e-19	PIK3IP1	chr22	-	31281593	31292534	3805	protein_coding	phosphoinositide-3-kinase_interacting_protein_1
ENSG00000274750	492.95742790904	10.5530773088976	-5.52976191211716	3.21462073365623e-21	1.17459976563379e-19	HIST1H3E	chr6	+	26224199	26227473	2679	protein_coding	histone_cluster_1_H3e
ENSG00000260228	208.556394284593	1.38777878078145e-17	-10.7072428552742	3.33979538567376e-21	1.2186863649537e-19	RP11-483P21.2	chr16	-	83789967	83807834	1603	antisense	NA
ENSG00000118495	47.3957925258271	1309.07158217937	4.783846240373	3.43021465537604e-21	1.24998876211987e-19	PLAGL1	chr6	-	143940300	144064599	8719	protein_coding	PLAG1_like_zinc_finger_1
ENSG00000151090	856.990747304106	26.3757952266003	-5.01564871164276	3.53066231186246e-21	1.28485613902406e-19	THRB	chr3	-	24117160	24495282	8709	protein_coding	thyroid_hormone_receptor_beta
ENSG00000254337	207.60839082275	1.38777878078145e-17	-10.7006741416441	3.69814253005937e-21	1.34218185014241e-19	RP11-865I6.2	chr8	-	68848742	68852763	515	lincRNA	NA
ENSG00000149575	1.38777878078145e-17	208.864592785747	10.7093101491321	3.69814253005937e-21	1.34218185014241e-19	SCN2B	chr11	-	118161951	118176673	5826	protein_coding	sodium_channel_voltage_gated_type_II_beta_subunit
ENSG00000153531	719.530249240902	21.1015533357814	-5.08369593320542	3.77694905589252e-21	1.36894097098384e-19	ADPRHL1	chr13	-	113399610	113453524	10924	protein_coding	ADP-ribosylhydrolase_like_1
ENSG00000134871	5.68356074469745	347.049747638686	5.90025454273422	3.87900437802575e-21	1.40404338332674e-19	COL4A2	chr13	+	110305812	110513027	8706	protein_coding	collagen_type_IV_alpha_2
ENSG00000186417	238.892504947932	1.05955866386509	-7.66261375311006	4.06784223606237e-21	1.47042136377557e-19	GLDN	chr15	+	51341629	51408013	7144	protein_coding	gliomedin
ENSG00000123689	1.89146593041347	267.936109498233	7.05144529709898	4.23003905163842e-21	1.52700445872131e-19	G0S2	chr1	+	209675420	209676388	866	protein_coding	G0/G1_switch_2
ENSG00000215146	0.943449169558452	238.400351176838	7.79655460517183	4.45143275231575e-21	1.60477721388966e-19	RP11-313J2.1	chr10	-	42331866	42367974	7024	transcribed_unprocessed_pseudogene	NA
ENSG00000001561	14.215637608667	553.800054605787	5.27107122165868	5.0244518761724e-21	1.80736432963503e-19	ENPP4	chr6	+	46129993	46146699	4651	protein_coding	ectonucleotide_pyrophosphatase/phosphodiesterase_4_(putative)
ENSG00000156140	1.38777878078145e-17	205.700047238665	10.6872970995073	5.03348888064935e-21	1.80736432963503e-19	ADAMTS3	chr4	-	72280969	72568799	6585	protein_coding	ADAM_metallopeptidase_with_thrombospondin_type_1_motif_3
ENSG00000166342	1.38777878078145e-17	205.700047238665	10.6872970995073	5.03348888064935e-21	1.80736432963503e-19	NETO1	chr18	-	72742314	72868146	5509	protein_coding	neuropilin_and_tolloid_like_1
ENSG00000269416	7.57958445112432	390.298536401275	5.6623630378664	5.14312534128197e-21	1.84427550469428e-19	LINC01224	chr19	-	23399233	23416075	3296	lincRNA	long_intergenic_non-protein_coding_RNA_1224
ENSG00000163661	0.943449169558452	236.290654151479	7.78373730575955	5.33576812086736e-21	1.91081438442642e-19	PTX3	chr3	+	157436789	157443628	1940	protein_coding	pentraxin_3
ENSG00000108176	435.129218131047	8.44338646668029	-5.66750922486508	5.47513511669408e-21	1.95812325672112e-19	DNAJC12	chr10	-	67796665	67838166	2121	protein_coding	DnaJ_heat_shock_protein_family_(Hsp40)_member_C12
ENSG00000182742	1.89146593041347	263.716715455814	7.02855564373942	5.86482566178208e-21	2.09471375888232e-19	HOXB4	chr17	-	48575513	48580111	3757	protein_coding	homeobox_B4
ENSG00000115641	419.961163090316	9360.73019170612	4.47786807703333	5.94837842436778e-21	2.12174566919976e-19	FHL2	chr2	-	105357712	105438513	6626	protein_coding	four_and_a_half_LIM_domains_2
ENSG00000149328	362.132953160193	5.2788609071888	-6.06818074503328	6.15721236794529e-21	2.1933340649143e-19	GLB1L2	chr11	+	134331874	134378341	7280	protein_coding	galactosidase_beta_1_like_2
ENSG00000253304	0.943449169558452	234.180957125761	7.77080511242348	6.40425454310263e-21	2.27832622703569e-19	TMEM200B	chr1	-	29119428	29123935	2639	protein_coding	transmembrane_protein_200B
ENSG00000249641	200.972366582627	1.38777878078145e-17	-10.6538361591691	6.87745417926516e-21	2.44022933418506e-19	HOXC13-AS	chr12	-	53935328	53939643	1408	antisense	HOXC13_antisense_RNA
ENSG00000167748	1.38777878078145e-17	202.535501690433	10.6649429573285	6.87745417926516e-21	2.44022933418506e-19	KLK1	chr19	-	50819148	50823787	2378	protein_coding	kallikrein_1
ENSG00000076641	3.7875259485201	287.978231186225	6.2007295257313	7.0300849088636e-21	2.49110735417103e-19	PAG1	chr8	-	80967810	81112068	11023	protein_coding	phosphoprotein_membrane_anchor_with_glycosphingolipid_microdomains_1
ENSG00000278828	565.953692601081	14.7724653244214	-5.24833593285366	7.07425650238763e-21	2.50346982734101e-19	HIST1H3H	chr6	+	27810064	27811300	1237	protein_coding	histone_cluster_1_H3h
ENSG00000088756	1.89146593041347	260.552169923293	7.01114688063554	7.51480614517513e-21	2.65588810630134e-19	ARHGAP28	chr18	+	6729718	6915716	11910	protein_coding	Rho_GTPase_activating_protein_28
ENSG00000176842	651.274001876641	18.9918569258258	-5.09099292588874	8.1082377171975e-21	2.86186830211974e-19	IRX5	chr16	+	54930862	54934485	2845	protein_coding	iroquois_homeobox_5
ENSG00000188517	1.89146593041347	259.497321412313	7.00529696263591	8.1666453391851e-21	2.87495767906613e-19	COL25A1	chr4	-	108810721	109302657	6653	protein_coding	collagen_type_XXV_alpha_1
ENSG00000277561	1.89146593041347	259.497321412313	7.00529696263591	8.1666453391851e-21	2.87495767906613e-19	GOLGA8IP	chr15	-	22607540	22617854	2598	transcribed_unprocessed_pseudogene	golgin_A8_family_member_I_pseudogene
ENSG00000227218	284.396670630828	3.16919693313913	-6.4346057252387	8.18344635211331e-21	2.87711622335186e-19	RP11-203J24.8	chr9	+	127934503	127940952	2520	antisense	NA
ENSG00000254535	0.943449169558452	232.071260099674	7.75775594670632	8.44251360487856e-21	2.96433361808796e-19	PABPC4L	chr4	-	134196333	134201748	4944	protein_coding	poly(A)_binding_protein_cytoplasmic_4-like
ENSG00000275004	1.38777878078145e-17	200.425804657617	10.6498454186029	8.48692723203317e-21	2.97605305252284e-19	ZNF280B	chr22	-	22484421	22509154	5723	protein_coding	zinc_finger_protein_280B
ENSG00000276850	1.38777878078145e-17	199.370956141005	10.6422369855376	9.43412893203682e-21	3.30390546469227e-19	CH17-360D5.2	chr10	-	47908064	47991850	2467	lincRNA	NA
ENSG00000224738	755.554379779087	23.2112499784401	-5.01743194377496	9.55769688944714e-21	3.34283857744269e-19	AC099850.1	chr17	+	59106598	59118267	1338	antisense	NA
ENSG00000152977	401.001094277268	7.38854262067175	-5.73935207150331	9.713362957637e-21	3.39288271393315e-19	ZIC1	chr3	+	147393422	147510293	6806	protein_coding	Zic_family_member_1
ENSG00000155962	7.57958445112432	378.695202835277	5.61883574406796	1.02446309269274e-20	3.57382558312451e-19	CLIC2	chrX	-	155276211	155334657	2840	protein_coding	chloride_intracellular_channel_2
ENSG00000069702	22.747684842905	710.972481562945	4.95807391874439	1.03722109957278e-20	3.61365686964852e-19	TGFBR3	chr1	-	91680343	91906335	8705	protein_coding	transforming_growth_factor_beta_receptor_III
ENSG00000261786	1.38777878078145e-17	198.316107624255	10.6345882145658	1.04917667046867e-20	3.65059330269138e-19	RP4-555D20.2	chr3	+	44117299	44122365	5067	lincRNA	NA
ENSG00000188060	0.943449169558452	228.906714559835	7.73795818771267	1.11639003084235e-20	3.87945535717717e-19	RAB42	chr1	+	28592200	28595443	2180	protein_coding	RAB42_member_RAS_oncogene_family
ENSG00000142227	29.3837161962256	858.651271899018	4.86285533215805	1.1199437830007e-20	3.88679588833935e-19	EMP3	chr19	+	48321509	48330553	1667	protein_coding	epithelial_membrane_protein_3
ENSG00000090776	155.468199917204	3521.0888893922	4.50018118989091	1.13415436011445e-20	3.93105481681828e-19	EFNB1	chrX	+	68828997	68842147	3314	protein_coding	ephrin-B1
ENSG00000085276	196.232349260065	1.38777878078145e-17	-10.6194242916157	1.16732719642235e-20	4.03049234042574e-19	MECOM	chr3	-	169083499	169663618	9103	protein_coding	MDS1_and_EVI1_complex_locus
ENSG00000239713	1.38777878078145e-17	197.261259107366	10.6268986756849	1.16732719642235e-20	4.03049234042574e-19	APOBEC3G	chr22	+	39040961	39087743	5454	protein_coding	apolipoprotein_B_mRNA_editing_enzyme_catalytic_polypeptide-like_3G
ENSG00000158258	196.232349260065	1.38777878078145e-17	-10.6194242916157	1.16732719642235e-20	4.03049234042574e-19	CLSTN2	chr3	+	139935185	140577397	14636	protein_coding	calsyntenin_2
ENSG00000164509	1.38777878078145e-17	196.206410590334	10.6191679319796	1.29937778425295e-20	4.48069326472698e-19	IL31RA	chr5	+	55851379	55922853	4576	protein_coding	interleukin_31_receptor_A
ENSG00000259424	225.62045655824	1.05955866386509	-7.58019591016817	1.3473238226957e-20	4.64009376791984e-19	RP11-35O15.1	chr15	-	98646951	98647371	334	antisense	NA
ENSG00000136352	2.83950028546094	278.484594599826	6.55218083468555	1.40299403084439e-20	4.82565523415176e-19	NKX2-1	chr14	-	36516392	36521149	3165	protein_coding	NK2_homeobox_1
ENSG00000122870	1.38777878078145e-17	195.151562073159	10.6113955394731	1.44703435064532e-20	4.96446924930047e-19	BICC1	chr10	+	58513140	58831437	6569	protein_coding	BicC_family_RNA_binding_protein_1
ENSG00000110675	1.38777878078145e-17	195.151562073159	10.6113955394731	1.44703435064532e-20	4.96446924930047e-19	ELMOD1	chr11	+	107591091	107666779	5856	protein_coding	ELMO/CED-12_domain_containing_1
ENSG00000173530	0.943449169558452	225.742169019117	7.71788496429205	1.48091941469975e-20	5.07426593860146e-19	TNFRSF10D	chr8	-	23135588	23164030	3538	protein_coding	tumor_necrosis_factor_receptor_superfamily_member_10d
ENSG00000008323	782.098475959511	25.3209467810738	-4.94235070646597	1.51759817091778e-20	5.19334419758489e-19	PLEKHG6	chr12	+	6310436	6328506	4260	protein_coding	pleckstrin_homology_and_RhoGEF_domain_containing_G6
ENSG00000188763	6.63157350604578	348.104596145673	5.68667146289897	1.65603191654508e-20	5.65272869133603e-19	FZD9	chr7	+	73433783	73436120	2338	protein_coding	frizzled_class_receptor_9
ENSG00000168994	6.63157350604578	348.104596145673	5.68667146289897	1.65603191654508e-20	5.65272869133603e-19	PXDC1	chr6	-	3722614	3752026	2474	protein_coding	PX_domain_containing_1
ENSG00000271601	27.4877075203187	801.689452776935	4.85963542278093	1.65858088390453e-20	5.65413888809746e-19	LIX1L	chr1	-	145933423	145958001	3975	protein_coding	limb_and_CNS_expressed_1_like
ENSG00000165626	673.078080900362	21.1015533357814	-4.98743234144552	1.66063858168553e-20	5.65413888809746e-19	BEND7	chr10	-	13438484	13528974	9815	protein_coding	BEN_domain_containing_7
ENSG00000109472	3706.68906723458	166.670652047211	-4.47406902187247	1.691561621758e-20	5.75216276069689e-19	CPE	chr4	+	165361194	165498320	2958	protein_coding	carboxypeptidase_E
ENSG00000138792	222.776446184167	1.05955866386509	-7.5619052767712	1.79109659289241e-20	6.08296104835476e-19	ENPEP	chr4	+	110365733	110565285	7802	protein_coding	glutamyl_aminopeptidase_(aminopeptidase_A)
ENSG00000137802	192.440335396739	1.38777878078145e-17	-10.5912913218163	1.79710864057775e-20	6.09570208827919e-19	MAPKBP1	chr15	+	41774434	41827855	10357	protein_coding	mitogen-activated_protein_kinase_binding_protein_1
ENSG00000115221	273.020629237317	3.16919693313913	-6.37573840731639	1.91927499186174e-20	6.50190570735472e-19	ITGB6	chr2	-	160099666	160271888	6357	protein_coding	integrin_subunit_beta_6
ENSG00000176406	6.63157350604578	344.940050624613	5.67350081852352	2.00243264418229e-20	6.77241562872636e-19	RIMS2	chr8	+	103500748	104256094	13621	protein_coding	regulating_synaptic_membrane_exocytosis_2
ENSG00000148735	191.492331930141	1.38777878078145e-17	-10.5841715167977	2.00414880654292e-20	6.77241562872636e-19	PLEKHS1	chr10	+	113751454	113783429	5402	protein_coding	pleckstrin_homology_domain_containing_S1
ENSG00000185904	30.3317204673078	853.377029388048	4.80835453856742	2.22084926375357e-20	7.4952967767683e-19	LINC00839	chr10	+	42475543	42495336	2337	lincRNA	long_intergenic_non-protein_coding_RNA_839
ENSG00000261379	190.544328463227	1.38777878078145e-17	-10.5770164006883	2.23611047396686e-20	7.52795943083525e-19	RP11-395N3.1	chr2	+	226804036	226805061	1026	sense_intronic	NA
ENSG00000203727	1.38777878078145e-17	191.987016520752	10.5878239202117	2.23611047396686e-20	7.52795943083525e-19	SAMD5	chr6	+	147508927	147737547	6320	protein_coding	sterile_alpha_motif_domain_containing_5
ENSG00000117245	3.7875259485201	272.155503539613	6.1192359807303	2.24813258902172e-20	7.55899543585531e-19	KIF17	chr1	-	20664014	20718017	4470	protein_coding	kinesin_family_member_17
ENSG00000146530	5.68356074469745	318.568837936785	5.77676188219849	2.45816229173513e-20	8.2548946897795e-19	VWDE	chr7	-	12330885	12403941	6490	protein_coding	von_Willebrand_factor_D_and_EGF_domains
ENSG00000181690	1.89146593041347	246.839139274834	6.9331827475206	2.47142662275083e-20	8.28911571008694e-19	PLAG1	chr8	-	56160904	56211324	7833	protein_coding	PLAG1_zinc_finger
ENSG00000140859	37.9157534079081	1012.65915319534	4.7344708117336	2.57409351049716e-20	8.62273361541196e-19	KIFC3	chr16	-	57758217	57863053	9600	protein_coding	kinesin_family_member_C3
ENSG00000153714	1214.38804192648	47.4727662977756	-4.67348959915255	2.66691811232233e-20	8.92259476636278e-19	LURAP1L	chr9	+	12775021	12822131	2132	protein_coding	leucine_rich_adaptor_protein_1-like
ENSG00000135547	966.959145688794	35.8694319418408	-4.74799283493065	2.75417295095208e-20	9.19488973684625e-19	HEY2	chr6	+	125747664	125761269	2741	protein_coding	hes-related_family_bHLH_transcription_factor_with_YRPW_motif_2
ENSG00000003147	1416.31277325893	58.021252115322	-4.60655963378642	2.75512530867454e-20	9.19488973684625e-19	ICA1	chr7	-	8113184	8262687	4891	protein_coding	islet_cell_autoantigen_1
ENSG00000135272	1.38777878078145e-17	189.87731948506	10.5718927917887	2.7877265113397e-20	9.28072013639336e-19	MDFIC	chr7	+	114922154	115019916	5966	protein_coding	MyoD_family_inhibitor_domain_containing
ENSG00000077264	1.38777878078145e-17	189.87731948506	10.5718927917887	2.7877265113397e-20	9.28072013639336e-19	PAK3	chrX	+	110944285	111227361	10312	protein_coding	p21_protein_(Cdc42/Rac)-activated_kinase_3
ENSG00000233913	1089.25158867432	41.1436748049736	-4.72248383462238	2.79798869859826e-20	9.30339867403215e-19	CTC-575D19.1	chr5	+	168616352	168616996	645	processed_pseudogene	NA
ENSG00000189410	29.3837161962256	823.841271325389	4.80315794635877	2.85099913407716e-20	9.46798554797104e-19	SH2D5	chr1	-	20719732	20732837	4423	protein_coding	SH2_domain_containing_5
ENSG00000103490	217.088425430395	1.05955866386509	-7.52461328520277	2.89986938023243e-20	9.60661888296654e-19	PYCARD	chr16	-	31201485	31203450	1661	protein_coding	PYD_and_CARD_domain_containing
ENSG00000115604	0.943449169558452	218.358229420514	7.66993189697395	2.89986938023243e-20	9.60661888296654e-19	IL18R1	chr2	+	102311529	102398775	4353	protein_coding	interleukin_18_receptor_1
ENSG00000150676	187.700318060551	1.38777878078145e-17	-10.5553356392468	3.11492445868004e-20	1.030638686537e-18	CCDC83	chr11	+	85855101	85920021	2359	protein_coding	coiled-coil_domain_containing_83
ENSG00000196376	0.943449169558452	217.303380905999	7.66294946784855	3.19682309980359e-20	1.0564403395748e-18	SLC35F1	chr6	+	117907526	118317676	4855	protein_coding	solute_carrier_family_35_member_F1
ENSG00000142173	262.592591278695	5513.69770808007	4.39144395855247	3.23424389585817e-20	1.06749841977615e-18	COL6A2	chr21	+	46098097	46132849	5386	protein_coding	collagen_type_VI_alpha_2
ENSG00000101298	8.5275940924434	378.695202835277	5.4515086555769	3.75915317256442e-20	1.23923379524905e-18	SNPH	chr20	+	1266316	1309328	5574	protein_coding	syntaphilin
ENSG00000272674	185.804311123774	1.38777878078145e-17	-10.5406986463341	3.8948393727732e-20	1.282396074801e-18	PCDHB16	chr5	+	141181399	141186399	5001	protein_coding	protocadherin_beta_16
ENSG00000047457	376.353004797117	7.38854262067175	-5.64786281629461	3.98364265673296e-20	1.31003546196904e-18	CP	chr3	-	149162410	149222055	7296	protein_coding	ceruloplasmin_(ferroxidase)
ENSG00000196126	30.3317204673078	830.170362338997	4.76858436972458	4.09534953251315e-20	1.3451302739799e-18	HLA-DRB1	chr6	-	32552990	32589848	1304	protein_coding	major_histocompatibility_complex_class_II_DR_beta_1
ENSG00000164318	1.89146593041347	240.510048201845	6.89572723116225	4.19073911602555e-20	1.37478675185821e-18	EGFLAM	chr5	+	38258409	38465021	5724	protein_coding	EGF-like_fibronectin_type_III_and_laminin_G_domains
ENSG00000108797	38.8637574037154	988.397637651329	4.6639813607631	4.41039971184815e-20	1.44508916925513e-18	CNTNAP1	chr17	+	42682613	42699814	6045	protein_coding	contactin_associated_protein_1
ENSG00000142675	329.900836071522	5.2788609071888	-5.93374397915836	4.63891186343261e-20	1.51811768579276e-18	CNKSR1	chr1	+	26177403	26189886	4043	protein_coding	connector_enhancer_of_kinase_suppressor_of_Ras_1
ENSG00000183688	141.248147605183	3026.36494233252	4.42002054092921	4.8063071261409e-20	1.57099246016382e-18	FAM101B	chr17	-	439978	445939	3621	protein_coding	family_with_sequence_similarity_101_member_B
ENSG00000215808	1.38777878078145e-17	184.603076893067	10.5312778870992	4.87986368441098e-20	1.59310416602696e-18	LINC01139	chr1	-	238480384	238486023	1537	lincRNA	long_intergenic_non-protein_coding_RNA_1139
ENSG00000185101	392.469063306537	8.44338646668029	-5.51869080906047	5.39986232523005e-20	1.76073382662822e-18	ANO9	chr11	-	417933	442011	6207	protein_coding	anoctamin_9
ENSG00000244242	736.594311075938	25.3209467810738	-4.85588540741112	5.87260221014385e-20	1.91256752655482e-18	IFITM10	chr11	-	1732410	1750591	4784	protein_coding	interferon_induced_transmembrane_protein_10
ENSG00000274253	1.38777878078145e-17	182.493379855118	10.5147062729628	6.12657727899758e-20	1.99047328801746e-18	RP11-566K19.6	chr15	+	22757857	22778741	1640	sense_overlapping	NA
ENSG00000107014	181.06429377574	1.38777878078145e-17	-10.5034429839281	6.12657727899758e-20	1.99047328801746e-18	RLN2	chr9	-	5299868	5304969	1278	protein_coding	relaxin_2
ENSG00000100311	408.585121804207	9.49823147579758	-5.40914321390571	7.06120161171957e-20	2.29136417162009e-18	PDGFB	chr22	-	39223359	39244751	3761	protein_coding	platelet-derived_growth_factor_beta_polypeptide
ENSG00000134247	5517.37562376101	273.2103520498	-4.33529717804768	8.35297573779517e-20	2.70728778540126e-18	PTGFRN	chr1	+	116910057	116990358	6352	protein_coding	prostaglandin_F2_receptor_inhibitor
ENSG00000181392	321.368805065299	5.2788609071888	-5.89595643259315	8.44053185972442e-20	2.73238153816721e-18	SYNE4	chr19	-	36003307	36008793	2528	protein_coding	spectrin_repeat_containing_nuclear_envelope_family_member_4
ENSG00000259977	206.660387360655	1.05955866386509	-7.45363565310669	8.65875440658728e-20	2.79966392479655e-18	AL121578.2	chrX	+	37906147	37949405	710	lincRNA	NA
ENSG00000163171	54.9798228174501	1287.97461214746	4.54680651123926	8.89594025900134e-20	2.87290928172731e-18	CDC42EP3	chr2	-	37641882	37738468	10406	protein_coding	CDC42_effector_protein_(Rho_GTPase_binding)_3
ENSG00000170962	2.83950028546094	255.277927367683	6.4267087117563	8.9918930659337e-20	2.9004233064111e-18	PDGFD	chr11	-	103907186	104164379	4266	protein_coding	platelet_derived_growth_factor_D
ENSG00000145687	443.66124908802	11.6079237420807	-5.24183050780977	9.56232651531347e-20	3.08073711842226e-18	SSBP2	chr5	-	81413021	81751797	11284	protein_coding	single-stranded_DNA_binding_protein_2
ENSG00000016082	1.38777878078145e-17	178.273985777142	10.4809808216876	9.71808681491495e-20	3.12718292423623e-18	ISL1	chr5	+	51383391	51394738	2882	protein_coding	ISL_LIM_homeobox_1
ENSG00000088538	18.007660057365	563.293691137751	4.95719643478834	9.87408904439383e-20	3.17359577081197e-18	DOCK3	chr3	+	50675241	51384198	8755	protein_coding	dedicator_of_cytokinesis_3
ENSG00000167619	5.68356074469745	298.526716277138	5.6830533224438	1.00432156841028e-19	3.22411135877995e-18	TMEM145	chr19	+	42313325	42325062	2640	protein_coding	transmembrane_protein_145
ENSG00000091656	2.83950028546094	253.168230344929	6.41474194587405	1.06394721878222e-19	3.41146262802393e-18	ZFHX4	chr8	+	76681219	76867285	15687	protein_coding	zinc_finger_homeobox_4
ENSG00000123892	1.38777878078145e-17	177.219137257201	10.4724248168042	1.09208203316123e-19	3.49336703513948e-18	RAB38	chr11	-	88113242	88175467	1465	protein_coding	RAB38_member_RAS_oncogene_family
ENSG00000090376	1.38777878078145e-17	177.219137257201	10.4724248168042	1.09208203316123e-19	3.49336703513948e-18	IRAK3	chr12	+	66188879	66254622	10004	protein_coding	interleukin_1_receptor_associated_kinase_3
ENSG00000139970	0.943449169558452	204.645198722718	7.57641301361261	1.17682530423566e-19	3.75998473388848e-18	RTN1	chr14	-	59595976	59870966	6209	protein_coding	reticulon_1
ENSG00000158373	865.52277821501	33.7597348255035	-4.67528241716108	1.26070334289108e-19	4.02321021827228e-18	HIST1H2BD	chr6	+	26158146	26171349	871	protein_coding	histone_cluster_1_H2bd
ENSG00000198133	728.062280158691	26.3757952266003	-4.78046945451115	1.35605648486821e-19	4.32238997292627e-18	TMEM229B	chr14	-	67447084	67533739	6377	protein_coding	transmembrane_protein_229B
ENSG00000119714	314.73278094532	5.2788609071888	-5.86586621068757	1.35811313357282e-19	4.32383456433585e-18	GPR68	chr14	-	91232532	91253925	3278	protein_coding	G_protein-coupled_receptor_68
ENSG00000189212	2.83950028546094	251.058533321874	6.40267508808545	1.37231003726332e-19	4.36388118689184e-18	DPY19L2P1	chr7	-	35079989	35186041	8272	transcribed_unprocessed_pseudogene	DPY19L2_pseudogene_1
ENSG00000254221	174.428269472836	1.38777878078145e-17	-10.4496139211651	1.38140227328978e-19	4.38761998840189e-18	PCDHGB1	chr5	+	141350102	141512979	4773	protein_coding	protocadherin_gamma_subfamily_B_1
ENSG00000180190	2.83950028546094	250.003684810232	6.39660359873568	1.49467689071569e-19	4.74181847471052e-18	TDRP	chr8	-	489792	545781	3613	protein_coding	testis_development_related_protein
ENSG00000282826	1.89146593041347	226.797017532789	6.81107531605817	1.50324318483814e-19	4.76339080168569e-18	FRG1CP	chr20	-	28580709	28602664	769	unprocessed_pseudogene	FSHD_region_gene_1_family_member_C_pseudogene
ENSG00000113070	20.8516752476805	591.774600729648	4.8181925577965	1.50871741739853e-19	4.77512604196817e-18	HBEGF	chr5	-	140332843	140346631	3018	protein_coding	heparin-binding_EGF-like_growth_factor
ENSG00000187498	0.943449169558452	201.480653174092	7.55394281267941	1.60555080751341e-19	5.07564866065727e-18	COL4A1	chr13	-	110148963	110307149	8188	protein_coding	collagen_type_IV_alpha_1
ENSG00000083290	664.54604997859	23.2112499784401	-4.83229929807498	1.66746942303224e-19	5.26522019455355e-18	ULK2	chr17	-	19770829	19867936	9843	protein_coding	unc-51_like_autophagy_activating_kinase_2
ENSG00000103489	172.532262525555	1.38777878078145e-17	-10.4338579419429	1.75127674624056e-19	5.52338347825999e-18	XYLT1	chr16	-	17101769	17470881	11004	protein_coding	xylosyltransferase_I
ENSG00000166446	1809.73419804453	84.3924662927222	-4.42056879139299	1.7653006999484e-19	5.56110965827202e-18	CDYL2	chr16	-	80597906	80804329	8557	protein_coding	chromodomain_protein_Y-like_2
ENSG00000184185	0.943449169558452	200.425804657617	7.54637429428536	1.78225471872698e-19	5.60796741484151e-18	KCNJ12	chr17	+	21376197	21419872	5617	protein_coding	potassium_channel_inwardly_rectifying_subfamily_J_member_12
ENSG00000137648	350.756911842408	7.38854262067175	-5.54628398389781	1.89039706117278e-19	5.94131085682812e-18	TMPRSS4	chr11	+	118077012	118121890	9948	protein_coding	transmembrane_protease_serine_4
ENSG00000148057	288.188684425293	4.22402546552972	-6.05242058388773	1.94335891419933e-19	6.1006538393829e-18	IDNK	chr9	+	83623049	83644130	1814	protein_coding	idnK_gluconokinase_homolog_(E._coli)
ENSG00000182107	2134.89937557511	102.324891640612	-4.38133210244894	1.97029279059862e-19	6.17801341759096e-18	TMEM30B	chr14	-	61277370	61281840	4471	protein_coding	transmembrane_protein_30B
ENSG00000122679	171.584259051284	1.38777878078145e-17	-10.4259149510613	1.97351998814927e-19	6.18094541236159e-18	RAMP3	chr7	+	45157791	45186302	1427	protein_coding	receptor_(G_protein-coupled)_activity_modifying_protein_3
ENSG00000198113	67.3038708714388	1463.07946340415	4.43952667854756	2.09133122637824e-19	6.54232457662593e-18	TOR4A	chr9	+	137277749	137282641	4148	protein_coding	torsin_family_4_member_A
ENSG00000139915	0.943449169558452	198.316107624255	7.53111709024821	2.19904045689362e-19	6.86334779636496e-18	MDGA2	chr14	-	46839629	47674954	8226	protein_coding	MAM_domain_containing_glycosylphosphatidylinositol_anchor_2
ENSG00000172935	0.943449169558452	198.316107624255	7.53111709024821	2.19904045689362e-19	6.86334779636496e-18	MRGPRF	chr11	-	69004395	69013409	2746	protein_coding	MAS_related_GPR_family_member_F
ENSG00000249364	170.636255576585	1.38777878078145e-17	-10.4179279865432	2.22524447643361e-19	6.93710318514552e-18	RP11-434D9.1	chr5	+	67379378	67805238	3250	lincRNA	NA
ENSG00000142185	10.4236106947186	388.188839389494	5.20149948771234	2.23238878793465e-19	6.9513390364256e-18	TRPM2	chr21	+	44350163	44443081	6705	protein_coding	transient_receptor_potential_cation_channel_subfamily_M_member_2
ENSG00000115738	1010.56730365732	42.198523384799	-4.5779085762679	2.28059212619469e-19	7.09324651383691e-18	ID2	chr2	+	8678845	8684453	2205	protein_coding	inhibitor_of_DNA_binding_2_dominant_negative_helix-loop-helix_protein
ENSG00000175287	2.83950028546094	244.729442250836	6.36585686133641	2.30114707618887e-19	7.14893226457477e-18	PHYHD1	chr9	+	128920895	128942041	2915	protein_coding	phytanoyl-CoA_dioxygenase_domain_containing_1
ENSG00000116761	30.3317204673078	768.989149202879	4.6581568042787	2.30545783974392e-19	7.15408240581525e-18	CTH	chr1	+	70411218	70439851	2414	protein_coding	cystathionine_gamma-lyase
ENSG00000143552	482.529390086853	14.7724653244214	-5.0183256550826	2.4587528501657e-19	7.62100337443314e-18	NUP210L	chr1	-	153992685	154155116	5889	protein_coding	nucleoporin_210kDa_like
ENSG00000042493	207.60839082275	4027.41616995574	4.27706354048998	2.47412733854142e-19	7.65985279117199e-18	CAPG	chr2	-	85394748	85418432	2607	protein_coding	capping_protein_(actin_filament)_gelsolin-like
ENSG00000276170	1.38777878078145e-17	170.890046133594	10.4199950058522	2.51053222982252e-19	7.76364817768281e-18	AC124789.1	chr17	-	38450394	38452444	1248	processed_transcript	NA
ENSG00000173890	1115.79568482131	48.5276148813543	-4.51971994330621	2.59806648078878e-19	8.02513868510313e-18	GPR160	chr3	+	170037929	170085403	4458	protein_coding	G_protein-coupled_receptor_160
ENSG00000152939	1498.78907195879	69.6245864241491	-4.4256917560488	2.76132906498742e-19	8.51967958426209e-18	MARVELD2	chr5	+	69415112	69444330	4898	protein_coding	MARVEL_domain_containing_2
ENSG00000184785	0.943449169558452	195.151562073159	7.50792441515557	3.02400647971596e-19	9.31946956937377e-18	SMIM10	chrX	+	134990938	134992473	1536	protein_coding	small_integral_membrane_protein_10
ENSG00000261437	167.792245149849	1.38777878078145e-17	-10.3936983138547	3.20115991977424e-19	9.8541642005288e-18	RP11-22C11.2	chr8	-	94637285	94639467	2183	antisense	NA
ENSG00000198535	217.088425430395	2.11437967028788	-6.60303292684913	3.21525705509262e-19	9.88627385947862e-18	C2CD4A	chr15	+	62066977	62070917	3445	protein_coding	C2_calcium-dependent_domain_containing_4A
ENSG00000127152	700.570180532674	26.3757952266003	-4.72494721241508	3.22736493102001e-19	9.91220076650178e-18	BCL11B	chr14	-	99169287	99271524	7855	protein_coding	B-cell_CLL/lymphoma_11B_(zinc_finger_protein)
ENSG00000240875	492.95742790904	15.8273130116772	-4.95043440362481	3.51341978343152e-19	1.07784844004567e-17	LINC00886	chr3	-	156747346	156817062	3822	lincRNA	long_intergenic_non-protein_coding_RNA_886
ENSG00000141376	6677.73182539227	356.543384200433	-4.2267501107134	3.51769904101427e-19	1.07793491295444e-17	BCAS3	chr17	+	60677453	61392838	14103	protein_coding	breast_carcinoma_amplified_sequence_3
ENSG00000170837	417.117152769254	11.6079237420807	-5.15285132371319	3.57690508350383e-19	1.09483339933898e-17	GPR27	chr3	+	71754050	71756496	2447	protein_coding	G_protein-coupled_receptor_27
ENSG00000279312	1.38777878078145e-17	167.725500569118	10.3930478267312	3.61797761766153e-19	1.10489676600069e-17	RP3-331H24.7	chr6	-	71373253	71375387	2135	TEC	NA
ENSG00000108602	166.844241673367	1.38777878078145e-17	-10.3855304756169	3.61797761766153e-19	1.10489676600069e-17	ALDH3A1	chr17	-	19737984	19748943	3918	protein_coding	aldehyde_dehydrogenase_3_family_member_A1
ENSG00000120217	7.57958445112432	320.678534952684	5.37900922680708	3.85182936071255e-19	1.17498224593863e-17	CD274	chr9	+	5450503	5470566	4108	protein_coding	CD274_molecule
ENSG00000215252	29.3837161962256	733.124300117779	4.63487541966776	3.86095920729963e-19	1.17643645179708e-17	GOLGA8B	chr15	-	34525207	34588503	7670	protein_coding	golgin_A8_family_member_B
ENSG00000100505	13.2676314239607	435.657022133815	5.02362300578937	3.95550396185445e-19	1.2038839710538e-17	TRIM9	chr14	-	50975262	51096061	8945	protein_coding	tripartite_motif_containing_9
ENSG00000142661	0.943449169558452	193.04186503837	7.4922528716014	4.17558606718569e-19	1.26943465487857e-17	MYOM3	chr1	-	24056035	24112175	9254	protein_coding	myomesin_3
ENSG00000180815	4.73554534719345	258.442472901264	5.73197827370097	4.29138830961379e-19	1.30317091393069e-17	MAP3K15	chrX	-	19360056	19515261	5573	protein_coding	mitogen-activated_protein_kinase_kinase_kinase_15
ENSG00000168477	129.87210563788	2523.20220724869	4.27872669979424	4.55904202681049e-19	1.38289232052836e-17	TNXB	chr6	-	32041154	32115334	15623	protein_coding	tenascin_XB
ENSG00000272405	296.720715457142	5.2788609071888	-5.78088034386123	4.81755846458338e-19	1.45966608489838e-17	RP11-284F21.10	chr1	-	156641666	156644887	3222	antisense	NA
ENSG00000164023	36.0197453457773	850.212483881435	4.55600169674781	4.98913534386785e-19	1.50995537242133e-17	SGMS2	chr4	+	107824563	107915047	7635	protein_coding	sphingomyelin_synthase_2
ENSG00000250510	8.5275940924434	335.446414059617	5.27661286646367	5.18317935501785e-19	1.56692392923107e-17	GPR162	chr12	+	6821545	6829972	3295	protein_coding	G_protein-coupled_receptor_162
ENSG00000144749	4890.74535473345	262.661866945043	-4.21815354973152	5.21171810535046e-19	1.57378712686316e-17	LRIG1	chr3	-	66378797	66501263	7032	protein_coding	leucine-rich_repeats_and_immunoglobulin-like_domains_1
ENSG00000137142	1.38777878078145e-17	164.560955002754	10.365587722671	5.24231469318131e-19	1.57948891638354e-17	IGFBPL1	chr9	-	38408994	38424447	1093	protein_coding	insulin_like_growth_factor_binding_protein-like_1
ENSG00000253361	163.052227762732	1.38777878078145e-17	-10.3523886927549	5.24231469318131e-19	1.57948891638354e-17	RP11-675F6.3	chr8	-	38543652	38552680	379	lincRNA	NA
ENSG00000101955	7.57958445112432	315.40429241263	5.3550927746394	5.40449825716824e-19	1.62653683038838e-17	SRPX	chrX	-	38149336	38220924	1987	protein_coding	sushi-repeat_containing_protein_X-linked
ENSG00000236081	1.89146593041347	213.083986846809	6.72114502117613	5.77574820524968e-19	1.73633027985243e-17	ELFN1-AS1	chr7	-	1738630	1742291	989	lincRNA	ELFN1_antisense_RNA_1
ENSG00000171724	0.943449169558452	189.87731948506	7.46842166747116	5.79007297166956e-19	1.73869830461071e-17	VAT1L	chr16	+	77788530	77980107	4137	protein_coding	vesicle_amine_transport_1-like
ENSG00000147813	27.4877075203187	680.381874984014	4.62297520775123	6.31037987866476e-19	1.89283319030116e-17	NAPRT	chr8	-	143574785	143578649	3079	protein_coding	nicotinate_phosphoribosyltransferase
ENSG00000130300	0.943449169558452	188.822470966982	7.46038964338021	6.46281385586638e-19	1.93640264930325e-17	PLVAP	chr19	-	17351448	17377350	2305	protein_coding	plasmalemma_vesicle_associated_protein
ENSG00000153208	20.8516752476805	552.745206102192	4.71978008140023	6.76917181107724e-19	2.02594325258056e-17	MERTK	chr2	+	111898479	112029561	4700	protein_coding	MER_proto-oncogene_tyrosine_kinase
ENSG00000153404	12.3196249236669	406.121263986711	5.02825130130132	7.10686858998159e-19	2.12325018685965e-17	PLEKHG4B	chr5	+	140258	189970	12203	protein_coding	pleckstrin_homology_and_RhoGEF_domain_containing_G4B
ENSG00000072201	309.992763714473	6.33370047263656	-5.5865176722336	7.11004568246779e-19	2.12325018685965e-17	LNX1	chr4	-	53459301	53701405	5725	protein_coding	ligand_of_numb-protein_X_1_E3_ubiquitin_protein_ligase
ENSG00000039600	3.7875259485201	232.071260099674	5.88948267417353	7.32562678507573e-19	2.18378036053171e-17	SOX30	chr5	-	157625679	157671480	3471	protein_coding	SRY-box_30
ENSG00000137460	548.889630733767	20.0467050958546	-4.76679122417494	7.32893727761329e-19	2.18378036053171e-17	FHDC1	chr4	+	152936352	152979696	6593	protein_coding	FH2_domain_containing_1
ENSG00000106714	1.38777878078145e-17	161.396409434414	10.3375947876629	7.63850922557727e-19	2.27351037281365e-17	CNTNAP3	chr9	-	39072767	39288315	9521	protein_coding	contactin_associated_protein-like_3
ENSG00000100342	3.7875259485201	231.01641158649	5.88291356164816	8.02619425257326e-19	2.38626630887421e-17	APOL1	chr22	+	36253010	36267530	3519	protein_coding	apolipoprotein_L1
ENSG00000159184	0.943449169558452	186.712773930349	7.44419018557857	8.06363778617367e-19	2.3947583319599e-17	HOXB13	chr17	-	48724763	48729178	3467	protein_coding	homeobox_B13
ENSG00000165215	952.739094176034	42.198523384799	-4.49290745409121	8.45351714945442e-19	2.5077837563497e-17	CLDN3	chr7	-	73768997	73770270	1274	protein_coding	claudin_3
ENSG00000249346	159.260213844189	1.38777878078145e-17	-10.3184676357738	8.6707402020066e-19	2.56939758557484e-17	LINC01016	chr6	-	33867506	33896914	3796	lincRNA	long_intergenic_non-protein_coding_RNA_1016
ENSG00000173068	0.943449169558452	185.65792541179	7.43602173057633	9.01377111984659e-19	2.66811582895481e-17	BNC2	chr9	-	16409503	16870843	15323	protein_coding	basonuclin_2
ENSG00000196782	381.093022007074	10.5530773088976	-5.15855298718987	9.13813276440483e-19	2.70196149259803e-17	MAML3	chr4	-	139716753	140154184	7012	protein_coding	mastermind_like_transcriptional_coactivator_3
ENSG00000266934	227.516463473292	3.16919693313913	-6.11283584990877	9.6444143180743e-19	2.84853533955303e-17	RP11-332H18.3	chr17	+	61382785	61384680	1329	sense_intronic	NA
ENSG00000105289	3300.9435980034	178.273985777142	-4.20979417712764	9.84544881668425e-19	2.90473055569702e-17	TJP3	chr19	+	3708109	3750813	4217	protein_coding	tight_junction_protein_3
ENSG00000179399	0.943449169558452	184.603076893067	7.4278067627816	1.00808807907875e-18	2.96769684939276e-17	GPC5	chr13	+	91398607	92873682	3544	protein_coding	glypican_5
ENSG00000185332	182.960300716023	1.05955866386509	-7.27802116396019	1.00808807907875e-18	2.96769684939276e-17	TMEM105	chr17	-	81311270	81330674	3794	protein_coding	transmembrane_protein_105
ENSG00000162105	2173.76751632699	113.92822559399	-4.25256451016354	1.02445527457048e-18	3.01259115965842e-17	SHANK2	chr11	-	70467856	71252577	18604	protein_coding	SH3_and_multiple_ankyrin_repeat_domains_2
ENSG00000182197	427.545190611695	7568.54258829146	4.14545378022821	1.0423131574676e-18	3.06176651462649e-17	EXT1	chr8	-	117794490	118111853	8325	protein_coding	exostosin_glycosyltransferase_1
ENSG00000169242	1340.47249858617	65.4051921431048	-4.35468193643497	1.07563930107087e-18	3.15622300246757e-17	EFNA1	chr1	+	155127460	155134857	2539	protein_coding	ephrin-A1
ENSG00000184292	2063.79911810095	107.599134354785	-4.26004325878394	1.09684731587394e-18	3.21495486085398e-17	TACSTD2	chr1	-	58575423	58577773	2351	protein_coding	tumor-associated_calcium_signal_transducer_2
ENSG00000230006	1.38777878078145e-17	158.231863864008	10.3090479339361	1.11942984693998e-18	3.27758363220234e-17	ANKRD36BP2	chr2	+	88765807	88806612	8042	transcribed_unprocessed_pseudogene	ankyrin_repeat_domain_36B_pseudogene_2
ENSG00000149231	47.3957925258271	1008.43975918775	4.40746665382792	1.17610855147054e-18	3.43607185254114e-17	CCDC82	chr11	-	96352769	96389923	6850	protein_coding	coiled-coil_domain_containing_82
ENSG00000109654	1007.7232933552	46.4179177142441	-4.43672661374743	1.17610855147054e-18	3.43607185254114e-17	TRIM2	chr4	+	153152342	153339320	9425	protein_coding	tripartite_motif_containing_2
ENSG00000007372	15.1636435283222	448.315204192517	4.87396854276871	1.26816641321702e-18	3.70101466437339e-17	PAX6	chr11	-	31784792	31817961	14782	protein_coding	paired_box_6
ENSG00000198108	1.38777878078145e-17	157.177015340063	10.2994053961854	1.27319768305812e-18	3.71168094284813e-17	CHSY3	chr5	+	129904472	130186634	3938	protein_coding	chondroitin_sulfate_synthase_3
ENSG00000007255	1242.82814493444	60.1309492706348	-4.366643297431	1.31986847674862e-18	3.84358243455759e-17	TRAPPC6A	chr19	-	45162928	45178237	933	protein_coding	trafficking_protein_particle_complex_6A
ENSG00000174791	14.215637608667	429.327931103535	4.90387684564725	1.34550581811702e-18	3.91401401201116e-17	RIN1	chr11	-	66330242	66336840	5469	protein_coding	Ras_and_Rab_interactor_1
ENSG00000234869	223.724449642393	3.16919693313913	-6.08860171130164	1.39824788483955e-18	4.06305522226112e-17	RP3-439F8.1	chr22	+	46541495	46548196	2949	antisense	NA
ENSG00000124171	4693.56064072587	263.716715455814	-4.15300398793552	1.41551672214324e-18	4.10880774266036e-17	PARD6B	chr20	+	50731544	50756795	4726	protein_coding	par-6_family_cell_polarity_regulator_beta
ENSG00000173040	1.89146593041347	203.590350206641	6.65542996235483	1.42796875047539e-18	4.14049519627089e-17	EVC2	chr4	-	5542772	5709548	5509	protein_coding	Ellis_van_Creveld_syndrome_2
ENSG00000183734	155.468199917204	1.38777878078145e-17	-10.2837297737458	1.44905371662968e-18	4.19711949759784e-17	ASCL2	chr11	-	2268495	2270952	1852	protein_coding	achaete-scute_family_bHLH_transcription_factor_2
ENSG00000133216	74.8878999565586	1475.73764542206	4.29819062491577	1.48221265166178e-18	4.28855647690037e-17	EPHB2	chr1	+	22710839	22921500	12516	protein_coding	EPH_receptor_B2
ENSG00000261716	1148.02780156924	55.9115549566817	-4.35693044628686	1.54647887685628e-18	4.46970518684958e-17	RP11-196G18.22	chr1	-	149844498	149849024	4527	sense_overlapping	NA
ENSG00000154118	200.972366582627	2.11437967028788	-6.49181607067032	1.58229729398252e-18	4.5683328511277e-17	JPH3	chr16	+	87601835	87698156	5941	protein_coding	junctophilin_3
ENSG00000149970	0.943449169558452	180.383682816483	7.3944709694896	1.58514850399034e-18	4.57167000626776e-17	CNKSR2	chrX	+	21374418	21654695	7160	protein_coding	connector_enhancer_of_kinase_suppressor_of_Ras_2
ENSG00000177685	1567.04531915411	80.1730720619615	-4.28674226081359	1.68531680795311e-18	4.8553689148786e-17	CRACR2B	chr11	+	826144	831991	3913	protein_coding	calcium_release_activated_channel_regulator_2B
ENSG00000075618	255.956567115188	4522.14011700027	4.14234517605551	1.69704080785388e-18	4.88392768672227e-17	FSCN1	chr7	+	5592823	5606655	3692	protein_coding	fascin_actin-bundling_protein_1
ENSG00000155629	14.215637608667	425.108537082988	4.88963205197795	1.73415322577784e-18	4.98541320749737e-17	PIK3AP1	chr10	-	96593312	96720514	5691	protein_coding	phosphoinositide-3-kinase_adaptor_protein_1
ENSG00000214575	4.73554534719345	241.564896714219	5.63459278334357	1.814588206816e-18	5.21109537646435e-17	CPEB1	chr15	-	82543201	82648861	8215	protein_coding	cytoplasmic_polyadenylation_element_binding_protein_1
ENSG00000169297	1.38777878078145e-17	155.067318291437	10.2799247965221	1.88080156515994e-18	5.38976567546259e-17	NR0B1	chrX	-	30304206	30309598	2203	protein_coding	nuclear_receptor_subfamily_0_group_B_member_1
ENSG00000128394	1.38777878078145e-17	155.067318291437	10.2799247965221	1.88080156515994e-18	5.38976567546259e-17	APOBEC3F	chr22	+	39040604	39053910	3242	protein_coding	apolipoprotein_B_mRNA_editing_enzyme_catalytic_polypeptide-like_3F
ENSG00000171385	199.076359654454	2.11437967028788	-6.47814966201894	1.94526458400837e-18	5.56857800131313e-17	KCND3	chr1	-	111770662	111989155	7863	protein_coding	potassium_channel_voltage_gated_Shal_related_subfamily_D_member_3
ENSG00000237523	7.57958445112432	296.417019259361	5.26555397957451	2.04421566412928e-18	5.84563304336269e-17	LINC00857	chr10	+	80207710	80219657	2171	lincRNA	long_intergenic_non-protein_coding_RNA_857
ENSG00000134508	1130.96373976177	55.9115549566817	-4.33532799073126	2.14867801366389e-18	6.13784441911658e-17	CABLES1	chr18	+	23134564	23260467	6654	protein_coding	Cdk5_and_Abl_enzyme_substrate_1
ENSG00000172137	0.943449169558452	177.219137257201	7.36895369248669	2.23804652787052e-18	6.37961550428714e-17	CALB2	chr16	+	71358713	71390438	1703	protein_coding	calbindin_2
ENSG00000183114	0.943449169558452	177.219137257201	7.36895369248669	2.23804652787052e-18	6.37961550428714e-17	FAM43B	chr1	+	20552439	20555010	2572	protein_coding	family_with_sequence_similarity_43_member_B
ENSG00000123201	218.036428889895	3.16919693313913	-6.05146969850462	2.24202956076253e-18	6.38422060565179e-17	GUCY1B2	chr13	-	50994511	51080862	4060	unitary_pseudogene	guanylate_cyclase_1_soluble_beta_2_(pseudogene)
ENSG00000100344	20.8516752476805	522.15459949383	4.63766087737014	2.2905004387504e-18	6.51536232398135e-17	PNPLA3	chr22	+	43923739	43964488	3232	protein_coding	patatin_like_phospholipase_domain_containing_3
ENSG00000141404	15.1636435283222	435.657022133815	4.83265915113081	2.3994843906266e-18	6.81817661513562e-17	GNAL	chr18	+	11688956	11885685	8445	protein_coding	guanine_nucleotide_binding_protein_(G_protein)_alpha_activating_activity_polypeptide_olfactory_type
ENSG00000144681	1.38777878078145e-17	152.957621241804	10.2601775471698	2.44791941157078e-18	6.94117716639512e-17	STAC	chr3	+	36380344	36548007	4396	protein_coding	SH3_and_cysteine_rich_domain
ENSG00000165443	1.38777878078145e-17	152.957621241804	10.2601775471698	2.44791941157078e-18	6.94117716639512e-17	PHYHIPL	chr10	+	59176590	59247774	4093	protein_coding	phytanoyl-CoA_2-hydroxylase_interacting_protein-like
ENSG00000130830	0.943449169558452	176.164288737075	7.36034664273606	2.51341864945469e-18	7.11941673331881e-17	MPP1	chrX	-	154778684	154821007	5396	protein_coding	membrane_protein_palmitoylated_1
ENSG00000165194	8.5275940924434	311.184898379831	5.16834289492408	2.55002648339441e-18	7.21553139047362e-17	PCDH19	chrX	-	100291644	100410273	9756	protein_coding	protocadherin_19
ENSG00000131477	1.38777878078145e-17	151.902772716599	10.2502016279869	2.79563523707797e-18	7.9022117193967e-17	RAMP2	chr17	+	42758447	42763041	1148	protein_coding	receptor_(G_protein-coupled)_activity_modifying_protein_2
ENSG00000005471	38.8637574037154	819.62187731626	4.39388442388113	2.82167724288073e-18	7.95792922452332e-17	ABCB4	chr7	-	87401697	87480435	7494	protein_coding	ATP_binding_cassette_subfamily_B_member_4
ENSG00000179673	0.943449169558452	175.109440216763	7.3516879353966	2.82420020317022e-18	7.95792922452332e-17	RPRML	chr17	-	46978156	46979248	1093	protein_coding	reprimo-like
ENSG00000157680	0.943449169558452	175.109440216763	7.3516879353966	2.82420020317022e-18	7.95792922452332e-17	DGKI	chr7	-	137381037	137847092	15549	protein_coding	diacylglycerol_kinase_iota
ENSG00000125430	31.2797246983149	701.478845038865	4.48139990241032	2.92147490563133e-18	8.22343343478647e-17	HS3ST3B1	chr17	+	14301083	14349404	5367	protein_coding	heparan_sulfate-glucosamine_3-sulfotransferase_3B1
ENSG00000171451	2.83950028546094	216.248532391372	6.18745282951293	2.98920833906952e-18	8.40531721286223e-17	DSEL	chr18	-	67506582	67516980	9531	protein_coding	dermatan_sulfate_epimerase-like
ENSG00000237978	149.780179009606	1.38777878078145e-17	-10.2300024665032	3.1950116995177e-18	8.96531586776216e-17	KCNMB2-AS1	chr3	-	178526505	178860405	1691	antisense	KCNMB2_antisense_RNA_1
ENSG00000080854	149.780179009606	1.38777878078145e-17	-10.2300024665032	3.1950116995177e-18	8.96531586776216e-17	IGSF9B	chr11	-	133908564	133956985	5753	protein_coding	immunoglobulin_superfamily_member_9B
ENSG00000107957	80.5759215954935	1506.32825196504	4.2223474343547	3.23403742652778e-18	9.06539015007777e-17	SH3PXD2A	chr10	-	103594027	103855543	11756	protein_coding	SH3_and_PX_domains_2A
ENSG00000183072	3.7875259485201	215.193683876632	5.78060913013341	3.29241903369455e-18	9.21945707815237e-17	NKX2-5	chr5	-	173232109	173235357	2094	protein_coding	NK2_homeobox_5
ENSG00000153132	27.4877075203187	629.749146843922	4.511428255193	3.47850011175591e-18	9.73041846614212e-17	CLGN	chr4	-	140388455	140427968	3127	protein_coding	calmegin
ENSG00000047617	9.47560276457628	324.897928984	5.08061248575448	3.50890565716554e-18	9.80530051307005e-17	ANO2	chr12	-	5531869	5946232	6255	protein_coding	anoctamin_2_calcium_activated_chloride_channel
ENSG00000167981	172.532262525555	1.05955866386509	-7.19341821179773	3.57166217125652e-18	9.97033562216392e-17	ZNF597	chr16	-	3432422	3443542	5513	protein_coding	zinc_finger_protein_597
ENSG00000101443	3.7875259485201	214.138835361778	5.77352382534453	3.62774205822901e-18	1.01164107903003e-16	WFDC2	chr20	+	45469706	45481532	1382	protein_coding	WAP_four-disulfide_core_domain_2
ENSG00000077274	1.38777878078145e-17	149.793075665394	10.2300404298705	3.65406510462079e-18	1.01478393008449e-16	CAPN6	chrX	-	111245103	111270523	3568	protein_coding	calpain_6
ENSG00000138650	1.38777878078145e-17	149.793075665394	10.2300404298705	3.65406510462079e-18	1.01478393008449e-16	PCDH10	chr4	+	133149315	133208606	10161	protein_coding	protocadherin_10
ENSG00000273853	148.83217552288	1.38777878078145e-17	-10.2208501185337	3.65406510462079e-18	1.01478393008449e-16	RP11-438D14.3	chr12	-	33432311	33432853	543	sense_intronic	NA
ENSG00000136160	1.38777878078145e-17	149.793075665394	10.2300404298705	3.65406510462079e-18	1.01478393008449e-16	EDNRB	chr13	-	77895481	77919768	5014	protein_coding	endothelin_receptor_type_B
ENSG00000148450	642.741970953007	27.4306436953507	-4.54435914254903	3.80170202903032e-18	1.05469852793037e-16	MSRB2	chr10	+	23095506	23122013	2052	protein_coding	methionine_sulfoxide_reductase_B2
ENSG00000186897	8.5275940924434	305.910655837847	5.14369081424354	3.86025708220345e-18	1.06984267706781e-16	C1QL4	chr12	-	49332411	49337188	2071	protein_coding	complement_component_1_q_subcomponent-like_4
ENSG00000144199	26.539703107702	609.707025284702	4.51516942626724	3.92044019582119e-18	1.08540647146318e-16	FAHD2B	chr2	-	97083583	97094882	2662	protein_coding	fumarylacetoacetate_hydrolase_domain_containing_2B
ENSG00000107719	18.9556652446005	492.618841380819	4.69032104913543	4.00838366820938e-18	1.1086161435583e-16	PALD1	chr10	+	70478821	70568449	4555	protein_coding	phosphatase_domain_containing_paladin_1
ENSG00000185272	1.89146593041347	194.096713555838	6.58657811961106	4.06305677447812e-18	1.12258595266985e-16	RBM11	chr21	+	14216130	14228372	2360	protein_coding	RNA_binding_motif_protein_11
ENSG00000109674	147.884172035518	1.38777878078145e-17	-10.2116393378727	4.18210919488395e-18	1.15429638228496e-16	NEIL3	chr4	+	177309836	177362943	2959	protein_coding	nei-like_DNA_glycosylase_3
ENSG00000064300	18.007660057365	474.68641680757	4.71034135605874	4.2446580157701e-18	1.17036245453227e-16	NGFR	chr17	+	49495293	49515017	4150	protein_coding	nerve_growth_factor_receptor
ENSG00000104267	1875.14643492734	103.379740184592	-4.17940032006123	4.28640152749432e-18	1.18066500092351e-16	CA2	chr8	+	85463852	85481493	2123	protein_coding	carbonic_anhydrase_II
ENSG00000249430	1.89146593041347	193.04186503837	6.57872106855605	4.52196375363516e-18	1.24313073196074e-16	CTD-2231H16.1	chr5	+	92151	139863	705	lincRNA	NA
ENSG00000087116	0.943449169558452	171.94489465468	7.32539557251904	4.52701319730565e-18	1.24313073196074e-16	ADAMTS2	chr5	-	179110851	179345430	7687	protein_coding	ADAM_metallopeptidase_with_thrombospondin_type_1_motif_2
ENSG00000221887	0.943449169558452	171.94489465468	7.32539557251904	4.52701319730565e-18	1.24313073196074e-16	HMSD	chr18	+	63949301	63981774	2920	protein_coding	histocompatibility_(minor)_serpin_domain_containing
ENSG00000111846	27.4877075203187	621.310358819271	4.4919688409547	4.59603885469651e-18	1.26080146241858e-16	GCNT2	chr6	+	10492223	10629368	9052	protein_coding	glucosaminyl_(N-acetyl)_transferase_2_I-branching_enzyme_(I_blood_group)
ENSG00000058335	1.89146593041347	191.987016520752	6.5708209928488	5.0350143969997e-18	1.37981908769811e-16	RASGRF1	chr15	-	78959947	79090773	9929	protein_coding	Ras_protein_specific_guanine_nucleotide_releasing_factor_1
ENSG00000164035	145.0401615695	1.38777878078145e-17	-10.1836488173406	5.49026248581732e-18	1.50304993088883e-16	EMCN	chr4	-	100395341	100880126	5243	protein_coding	endomucin
ENSG00000183044	3741.76519424705	221.522774963406	-4.07745908175734	5.55556593021827e-18	1.51938530298444e-16	ABAT	chr16	+	8674565	8784575	9744	protein_coding	4-aminobutyrate_aminotransferase
ENSG00000196628	0.943449169558452	169.835197612306	7.3075972973501	5.75093053058318e-18	1.5696315049363e-16	TCF4	chr18	-	55222331	55664787	24564	protein_coding	transcription_factor_4
ENSG00000163623	0.943449169558452	169.835197612306	7.3075972973501	5.75093053058318e-18	1.5696315049363e-16	NKX6-1	chr4	-	84491987	84498450	3086	protein_coding	NK6_homeobox_1
ENSG00000233030	208.556394284593	3.16919693313913	-5.98737688006981	5.92547377740944e-18	1.61563524652804e-16	RP11-196G18.3	chr1	-	149785659	149793020	3543	antisense	NA
ENSG00000008513	2308.38400380586	132.915499213323	-4.11707826146472	6.07294719053046e-18	1.65417266605903e-16	ST3GAL1	chr8	-	133454848	133571940	8729	protein_coding	ST3_beta-galactoside_alpha-23-sialyltransferase_1
ENSG00000006757	1.89146593041347	189.87731948506	6.55488986442581	6.25105387705144e-18	1.70096789958193e-16	PNPLA4	chrX	-	7898247	7927739	3441	protein_coding	patatin_like_phospholipase_domain_containing_4
ENSG00000176641	708.154208016311	32.7048862771805	-4.43145426827591	6.29593239460657e-18	1.71019676248723e-16	RNF152	chr18	-	61808063	61894247	10632	protein_coding	ring_finger_protein_152
ENSG00000143032	1.38777878078145e-17	145.573681559676	10.188852584932	6.29765402784922e-18	1.71019676248723e-16	BARHL2	chr1	-	90711539	90717237	1979	protein_coding	BarH-like_homeobox_2
ENSG00000182326	8.5275940924434	297.471867768274	5.10334976979709	6.78313446004982e-18	1.84018112524853e-16	C1S	chr12	+	6988259	7071032	6462	protein_coding	complement_component_1_s_subcomponent
ENSG00000142627	278.708649936031	4588.59557257307	4.04059224077393	7.03971663426205e-18	1.90786933426644e-16	EPHA2	chr1	-	16124337	16156087	4159	protein_coding	EPH_receptor_A2
ENSG00000104967	143.144154588759	1.38777878078145e-17	-10.1646821441165	7.22925965327074e-18	1.95530808234803e-16	NOVA2	chr19	-	45933734	45973546	8684	protein_coding	neuro-oncological_ventral_antigen_2
ENSG00000186212	143.144154588759	1.38777878078145e-17	-10.1646821441165	7.22925965327074e-18	1.95530808234803e-16	SOWAHB	chr4	-	76894928	76898147	3220	protein_coding	sosondowah_ankyrin_repeat_domain_family_member_B
ENSG00000168765	606.717840377575	26.3757952266003	-4.5174845073748	7.54043018566541e-18	2.0374272583833e-16	GSTM4	chr1	+	109656081	109674836	5460	protein_coding	glutathione_S-transferase_mu_4
ENSG00000174099	12.3196249236669	362.872475240227	4.86585425264406	7.94966471019993e-18	2.14483028861645e-16	MSRB3	chr12	+	65278643	65488244	5791	protein_coding	methionine_sulfoxide_reductase_B3
ENSG00000150938	524.241541360993	8432.46351071549	4.00731570407435	7.95383182013073e-18	2.14483028861645e-16	CRIM1	chr2	+	36355926	36551135	7122	protein_coding	cysteine_rich_transmembrane_BMP_regulator_1_(chordin-like)
ENSG00000237943	1.38777878078145e-17	143.463984505092	10.1678091460038	8.30504233976928e-18	2.23730041692526e-16	PRKCQ-AS1	chr10	+	6580419	6616452	3892	processed_transcript	PRKCQ_antisense_RNA_1
ENSG00000254667	1.89146593041347	186.712773930349	6.53065838253322	8.67803804303392e-18	2.33312037755187e-16	AP000783.1	chr11	+	123430737	123435710	707	transcribed_unprocessed_pseudogene	NA
ENSG00000266709	1.89146593041347	186.712773930349	6.53065838253322	8.67803804303392e-18	2.33312037755187e-16	RP11-214O1.2	chr17	+	14303854	14305505	1652	lincRNA	NA
ENSG00000131773	6.63157350604578	259.497321412313	5.26304032669877	8.7845368861994e-18	2.35940061427543e-16	KHDRBS3	chr8	+	135457457	135656722	8645	protein_coding	KH_domain_containing_RNA_binding_signal_transduction_associated_3
ENSG00000223573	1593.58941528463	89.6667090633033	-4.14974741426996	9.04717708614427e-18	2.42752415228822e-16	TINCR	chr19	-	5558167	5568034	3925	lincRNA	tissue_differentiation-inducing_non-protein_coding_RNA
ENSG00000164128	680.66210838581	31.6500377371247	-4.42146299659366	9.16712799436787e-18	2.45726415006087e-16	NPY1R	chr4	-	163323961	163344832	4180	protein_coding	neuropeptide_Y_receptor_Y1
ENSG00000188171	0.943449169558452	165.61580352509	7.27132816335095	9.34592708156684e-18	2.50270377042236e-16	ZNF626	chr19	-	20620061	20661596	6713	protein_coding	zinc_finger_protein_626
ENSG00000124882	141.248147605183	1.38777878078145e-17	-10.1454627962799	9.54831215111204e-18	2.54722149985366e-16	EREG	chr4	+	74365143	74388751	5717	protein_coding	epiregulin
ENSG00000204179	1.38777878078145e-17	142.409135977352	10.1571711919778	9.54831215111204e-18	2.54722149985366e-16	PTPN20	chr10	+	46911396	47002488	4506	protein_coding	protein_tyrosine_phosphatase_non-receptor_type_20
ENSG00000141485	1.38777878078145e-17	142.409135977352	10.1571711919778	9.54831215111204e-18	2.54722149985366e-16	SLC13A5	chr17	-	6684713	6713567	9020	protein_coding	solute_carrier_family_13_(sodium-dependent_citrate_transporter)_member_5
ENSG00000160161	58.7718377319259	1089.66309382975	4.20960452820964	9.54995526348753e-18	2.54722149985366e-16	CILP2	chr19	+	19538248	19546659	4360	protein_coding	cartilage_intermediate_layer_protein_2
ENSG00000180573	471.153348823204	18.9918569258258	-4.62403435968657	9.81218829702278e-18	2.61457973930352e-16	HIST1H2AC	chr6	+	26124145	26139116	1668	protein_coding	histone_cluster_1_H2ac
ENSG00000272068	239.840508403008	4.22402546552972	-5.78761254488458	9.94053523351456e-18	2.64616459138158e-16	RP11-284F21.9	chr1	-	156637783	156641004	3222	lincRNA	NA
ENSG00000168675	1069.34351656303	56.9664035364001	-4.22760265981239	1.02170464051842e-17	2.71708948088951e-16	LDLRAD4	chr18	+	13217498	13652755	16759	protein_coding	low_density_lipoprotein_receptor_class_A_domain_containing_4
ENSG00000166963	18.007660057365	454.644295220988	4.6481209434093	1.0742747308159e-17	2.8540780680967e-16	MAP1A	chr15	+	43510958	43531620	10629	protein_coding	microtubule_associated_protein_1A
ENSG00000188488	3.7875259485201	203.590350206641	5.70068849286739	1.08157841388467e-17	2.87040662239034e-16	SERPINA5	chr14	+	94561442	94593120	3775	protein_coding	serpin_peptidase_inhibitor_clade_A_(alpha-1_antiproteinase_antitrypsin)_member_5
ENSG00000065609	1.89146593041347	184.603076893067	6.51427495973625	1.08254970517354e-17	2.87040662239034e-16	SNAP91	chr6	-	83552880	83709691	6651	protein_coding	synaptosome_associated_protein_91kDa
ENSG00000106991	40.7597653317094	801.689452776935	4.29347622690559	1.09522265859296e-17	2.90115660232002e-16	ENG	chr9	-	127815012	127854756	3935	protein_coding	endoglin
ENSG00000048052	1.38777878078145e-17	141.354287449306	10.1464542141565	1.09863109690506e-17	2.90732935811009e-16	HDAC9	chr7	+	18086949	19002416	16827	protein_coding	histone_deacetylase_9
ENSG00000115590	2.83950028546094	202.535501690433	6.09299158213766	1.19737525567955e-17	3.16553148477008e-16	IL1R2	chr2	+	101991844	102028544	3073	protein_coding	interleukin_1_receptor_type_II
ENSG00000106078	2095.08323138978	123.421862420487	-4.08402188354342	1.24482118614178e-17	3.28774222384909e-16	COBL	chr7	-	51016212	51316818	14349	protein_coding	cordon-bleu_WH2_repeat_protein
ENSG00000111252	141.248147605183	2358.64584105301	4.06040960544185	1.24873589024092e-17	3.29485440471982e-16	SH2B3	chr12	+	111405948	111451623	5682	protein_coding	SH2B_adaptor_protein_3
ENSG00000279662	353.600922172584	11.6079237420807	-4.91460095289174	1.27959229944703e-17	3.37297027828823e-16	RP11-609N14.4	chr16	-	10445309	10449747	4439	TEC	NA
ENSG00000259349	320.420801619809	9.49823147579758	-5.0585998165672	1.30809692500607e-17	3.44474039840955e-16	RP11-15E18.1	chr17	+	60526293	60550798	718	antisense	NA
ENSG00000166394	6.63157350604578	254.223078856343	5.23342954830696	1.32139995267593e-17	3.4763776706204e-16	CYB5R2	chr11	-	7665100	7677222	8596	protein_coding	cytochrome_b5_reductase_2
ENSG00000172086	993.503241844228	52.7470092132371	-4.23226613655355	1.36851324130995e-17	3.59681560089319e-16	KRCC1	chr2	-	88027205	88055729	1753	protein_coding	lysine-rich_coiled-coil_1
ENSG00000189068	1.38777878078145e-17	139.244590392279	10.1247784289893	1.45793949334297e-17	3.82439653477495e-16	VSTM1	chr19	-	54040825	54063953	1111	protein_coding	V-set_and_transmembrane_domain_containing_1
ENSG00000259863	1.38777878078145e-17	139.244590392279	10.1247784289893	1.45793949334297e-17	3.82439653477495e-16	SH3RF3-AS1	chr2	-	109127327	109128930	1604	lincRNA	SH3RF3_antisense_RNA_1
ENSG00000153071	2.83950028546094	200.425804657617	6.07789404341207	1.46931896072729e-17	3.85050098104684e-16	DAB2	chr5	-	39371675	39462300	7717	protein_coding	Dab_mitogen-responsive_phosphoprotein_homolog_2_(Drosophila)
ENSG00000143851	22.747684842905	510.551265950491	4.4804317854503	1.49390261764345e-17	3.90814421347502e-16	PTPN7	chr1	-	202147013	202161588	5906	protein_coding	protein_tyrosine_phosphatase_non-receptor_type_7
ENSG00000117114	216.140421970674	3486.27888885315	4.01083491379961	1.49421370766623e-17	3.90814421347502e-16	ADGRL2	chr1	+	81306160	81992436	7754	protein_coding	adhesion_G_protein-coupled_receptor_L2
ENSG00000165272	1035.21539294146	55.9115549566817	-4.2077215292487	1.49878270152091e-17	3.91629596213303e-16	AQP3	chr9	-	33441154	33447611	2928	protein_coding	aquaporin_3_(Gill_blood_group)
ENSG00000273382	334.640853294827	10.5530773088976	-4.97109123835206	1.51854544146719e-17	3.96409451835472e-16	RP5-1065J22.8	chr1	-	109087971	109090858	2888	antisense	NA
ENSG00000145451	234.152487669985	4.22402546552972	-5.75300443069186	1.54118009228635e-17	4.01929036446748e-16	GLRA3	chr4	-	174636914	174829314	9599	protein_coding	glycine_receptor_alpha_3
ENSG00000109339	198.128356189945	3.16919693313913	-5.91342171503917	1.6286680235181e-17	4.24334897798927e-16	MAPK10	chr4	-	86015123	86594131	9816	protein_coding	mitogen-activated_protein_kinase_10
ENSG00000184005	1.38777878078145e-17	138.189741863287	10.1138171748659	1.68154984508269e-17	4.37689895004824e-16	ST6GALNAC3	chr1	+	76074719	76634601	7237	protein_coding	ST6_(alpha-N-acetyl-neuraminyl-23-beta-galactosyl-13)-N-acetylgalactosaminide_alpha-26-sialyltransferase_3
ENSG00000151474	412.377135566801	15.8273130116772	-4.69300954241419	1.69081301851862e-17	4.39676604217677e-16	FRMD4A	chr10	-	13643706	14462142	13328	protein_coding	FERM_domain_containing_4A
ENSG00000131149	12251.044006141	794.305513260485	-3.94686372515121	1.73847331453972e-17	4.51634599228112e-16	GSE1	chr16	+	85611409	85676204	10173	protein_coding	Gse1_coiled-coil_protein
ENSG00000151835	123.236081097175	2045.35583617094	4.05142846980557	1.81664930601064e-17	4.7148955905566e-16	SACS	chr13	-	23328823	23433728	15909	protein_coding	sacsin_molecular_chaperone
ENSG00000165474	136.508130133136	1.38777878078145e-17	-10.0962635041879	1.94104827796583e-17	5.02807952580467e-16	GJB2	chr13	-	20187470	20192898	2427	protein_coding	gap_junction_protein_beta_2
ENSG00000205488	136.508130133136	1.38777878078145e-17	-10.0962635041879	1.94104827796583e-17	5.02807952580467e-16	CALML3-AS1	chr10	-	5514244	5526246	4757	antisense	CALML3_antisense_RNA_1
ENSG00000166780	671.182074028917	32.7048862771805	-4.35410939072371	2.01320175505797e-17	5.20998066476902e-16	C16orf45	chr16	+	15434295	15625028	3688	protein_coding	chromosome_16_open_reading_frame_45
ENSG00000131037	1263.68422047282	71.7342835590081	-4.136560741085	2.03093699608436e-17	5.25083864203364e-16	EPS8L1	chr19	+	55072020	55087923	5341	protein_coding	EPS8_like_1
ENSG00000149557	264.488598181374	6.33370047263656	-5.35759205619886	2.11020051474316e-17	5.45054282380883e-16	FEZ1	chr11	-	125445745	125496317	5937	protein_coding	fasciculation_and_elongation_protein_zeta_1
ENSG00000140945	135.560126636365	1.38777878078145e-17	-10.0862190558739	2.24245329007231e-17	5.78107030784799e-16	CDH13	chr16	+	82626803	83800640	11217	protein_coding	cadherin_13
ENSG00000138271	135.560126636365	1.38777878078145e-17	-10.0862190558739	2.24245329007231e-17	5.78107030784799e-16	GPR87	chr3	-	151294086	151316952	1698	protein_coding	G_protein-coupled_receptor_87
ENSG00000256008	0.943449169558452	157.177015340063	7.19593427186785	2.54147479536046e-17	6.54569334591119e-16	RP11-728G15.1	chr12	-	120629611	120641591	1119	antisense	NA
ENSG00000244405	104.276010661215	1729.95613426801	4.05057025028586	2.56957688647441e-17	6.61175670998748e-16	ETV5	chr3	-	186046308	186110318	5802	protein_coding	ets_variant_5
ENSG00000117461	2200.31161244997	136.080044804319	-4.01399099128439	2.72636487391816e-17	7.008499064831e-16	PIK3R3	chr1	-	46040140	46133036	7410	protein_coding	phosphoinositide-3-kinase_regulatory_subunit_3
ENSG00000153029	1425.79280759259	83.3376177362614	-4.09470342351957	2.73131177714875e-17	7.01452889358032e-16	MR1	chr1	+	181033425	181061938	9348	protein_coding	major_histocompatibility_complex_class_I-related
ENSG00000181126	3.7875259485201	194.096713555838	5.63183665012362	2.74290973890364e-17	7.03761218071129e-16	HLA-V	chr6	+	29790954	29797811	5662	transcribed_unprocessed_pseudogene	major_histocompatibility_complex_class_I_V_(pseudogene)
ENSG00000164099	25.5916986392898	541.141872562041	4.3953135261181	2.78822658796865e-17	7.14708347634625e-16	PRSS12	chr4	-	118280038	118353003	5725	protein_coding	protease_serine_12
ENSG00000166073	109.964031849833	1811.17946887405	4.04022774282373	2.81731845353491e-17	7.21479671586158e-16	GPR176	chr15	-	39799023	39920892	5128	protein_coding	G_protein-coupled_receptor_176
ENSG00000114279	4.73554534719345	212.029138331723	5.4465444780064	2.88447801261561e-17	7.36824511265597e-16	FGF12	chr3	-	192139395	192767764	7355	protein_coding	fibroblast_growth_factor_12
ENSG00000171804	4.73554534719345	212.029138331723	5.4465444780064	2.88447801261561e-17	7.36824511265597e-16	WDR87	chr19	-	37884823	37906677	9199	protein_coding	WD_repeat_domain_87
ENSG00000140057	765.034414129753	40.0888262268668	-4.25017553355727	2.88543604500657e-17	7.36824511265597e-16	AK7	chr14	+	96392111	96489427	5001	protein_coding	adenylate_kinase_7
ENSG00000179082	155.468199917204	1.05955866386509	-7.04329004360062	2.88825949537935e-17	7.36847734649001e-16	C9orf106	chr9	+	129321016	129324905	3145	lincRNA	chromosome_9_open_reading_frame_106
ENSG00000064195	133.664119640337	1.38777878078145e-17	-10.0659178961963	3.00051532995524e-17	7.63636064348433e-16	DLX3	chr17	-	49990005	49995224	2715	protein_coding	distal-less_homeobox_3
ENSG00000156466	1.38777878078145e-17	135.025196274332	10.0804246887161	3.00051532995524e-17	7.63636064348433e-16	GDF6	chr8	-	96142330	96160792	3701	protein_coding	growth_differentiation_factor_6
ENSG00000171649	1.89146593041347	175.109440216763	6.43815613235125	3.00175861532797e-17	7.63636064348433e-16	ZIK1	chr19	+	57578456	57593777	5257	protein_coding	zinc_finger_protein_interacting_with_K_protein_1
ENSG00000150687	16501.8913982489	1109.70521536357	-3.89423799418839	3.08356680339732e-17	7.83708411125467e-16	PRSS23	chr11	+	86791059	86952910	11725	protein_coding	protease_serine_23
ENSG00000049323	2635.4451881565	166.670652047211	-3.98200504401404	3.39338675929787e-17	8.61639052271435e-16	LTBP1	chr2	+	32946972	33399509	7329	protein_coding	latent_transforming_growth_factor_beta_binding_protein_1
ENSG00000181104	29.3837161962256	597.048843246053	4.33872046829363	3.40601189168974e-17	8.64031201047088e-16	F2R	chr5	+	76716043	76735781	4066	protein_coding	coagulation_factor_II_(thrombin)_receptor
ENSG00000080493	1.38777878078145e-17	133.970347744002	10.0691198675065	3.47528041380895e-17	8.80774545477183e-16	SLC4A4	chr4	+	71187286	71572087	8361	protein_coding	solute_carrier_family_4_(sodium_bicarbonate_cotransporter)_member_4
ENSG00000170689	20.8516752476805	459.918537744287	4.45460714507137	3.65502916121916e-17	9.25460247525219e-16	HOXB9	chr17	-	48621159	48626356	2581	protein_coding	homeobox_B9
ENSG00000116141	0.943449169558452	155.067318291437	7.17645367220458	3.73763212997963e-17	9.45487692467455e-16	MARK1	chr1	+	220528183	220664461	5417	protein_coding	MAP/microtubule_affinity-regulating_kinase_1
ENSG00000178401	1961.41474733509	121.31216535103	-4.01376433497067	3.81729106444905e-17	9.64733559924397e-16	DNAJC22	chr12	+	49346917	49357546	5006	protein_coding	DnaJ_heat_shock_protein_family_(Hsp40)_member_C22
ENSG00000135074	35.0717412763137	682.491571989586	4.27737912906004	3.82253526925641e-17	9.65154363958505e-16	ADAM19	chr5	-	157395534	157575775	7704	protein_coding	ADAM_metallopeptidase_domain_19
ENSG00000153551	4.73554534719345	208.864592785747	5.42486226800617	3.87091858960489e-17	9.76456414287049e-16	CMTM7	chr3	+	32391671	32483067	3751	protein_coding	CKLF-like_MARVEL_transmembrane_domain_containing_7
ENSG00000164647	1.38777878078145e-17	132.915499213323	10.0577257627144	4.02866901473393e-17	1.01435190150621e-15	STEAP1	chr7	+	90154375	90164829	1625	protein_coding	six_transmembrane_epithelial_antigen_of_the_prostate_1
ENSG00000154537	1.38777878078145e-17	132.915499213323	10.0577257627144	4.02866901473393e-17	1.01435190150621e-15	FAM27C	chr9	+	61854162	61855331	616	lincRNA	family_with_sequence_similarity_27_member_C
ENSG00000178752	12.3196249236669	334.391565552221	4.74797078189833	4.38192079387542e-17	1.10226563551907e-15	FAM132B	chr2	+	238158982	238168900	3572	protein_coding	family_with_sequence_similarity_132_member_B
ENSG00000213214	222.776446184167	4.22402546552972	-5.68119339523908	4.55999064785419e-17	1.14598982115597e-15	ARHGEF35	chr7	-	144186083	144195655	2431	protein_coding	Rho_guanine_nucleotide_exchange_factor_35
ENSG00000139687	1376.49662905654	82.2827691789892	-4.06229569890936	4.64872376259545e-17	1.16720190858612e-15	RB1	chr13	+	48303751	48481986	6169	protein_coding	retinoblastoma_1
ENSG00000079841	1.38777878078145e-17	131.86065068229	10.0462409528117	4.67428904914645e-17	1.17252910231891e-15	RIMS1	chr6	+	71886703	72403143	12788	protein_coding	regulating_synaptic_membrane_exocytosis_1
ENSG00000170396	6.63157350604578	239.455199689385	5.14713236512449	4.68766580821439e-17	1.17479178609953e-15	ZNF804A	chr2	+	184598366	184939492	4694	protein_coding	zinc_finger_protein_804A
ENSG00000121281	50.2398039678286	894.516120971986	4.15069327255777	4.84303349211922e-17	1.21260205337499e-15	ADCY7	chr16	+	50246137	50318135	8630	protein_coding	adenylate_cyclase_7
ENSG00000121316	27.4877075203187	556.96460011652	4.33427261482534	4.9942063876707e-17	1.24929285204015e-15	PLBD1	chr12	-	14503661	14568349	2841	protein_coding	phospholipase_B_domain_containing_1
ENSG00000198963	1.38777878078145e-17	130.805802150895	10.0346639820487	5.42820663771841e-17	1.35659888964518e-15	RORB	chr9	+	74497365	74693177	9591	protein_coding	RAR-related_orphan_receptor_B
ENSG00000143382	115.65205298594	1829.11189339722	3.98176473167663	5.524432936913e-17	1.37936906089626e-15	ADAMTSL4	chr1	+	150549369	150560937	6432	protein_coding	ADAMTS_like_4
ENSG00000177675	3.7875259485201	187.767622448745	5.58403937899835	5.79777672658096e-17	1.44627980766866e-15	CD163L1	chr12	-	7346685	7479897	5690	protein_coding	CD163_molecule_like_1
ENSG00000235961	1.89146593041347	169.835197612306	6.39406549430475	6.06747052796706e-17	1.51215721124917e-15	PNMA6A	chrX	+	153072482	153075018	2209	protein_coding	paraneoplastic_Ma_antigen_family_member_6A
ENSG00000148180	7345.12624200998	501.057629414029	-3.87341806994273	6.27594285263705e-17	1.562529420029e-15	GSN	chr9	+	121207794	121332843	11097	protein_coding	gelsolin
ENSG00000180422	128.924102134996	1.38777878078145e-17	-10.0138788679276	6.30940901397139e-17	1.562529420029e-15	LINC00304	chr16	+	89159146	89164245	3961	lincRNA	long_intergenic_non-protein_coding_RNA_304
ENSG00000169067	1.38777878078145e-17	129.750953619133	10.0229933593461	6.30940901397139e-17	1.562529420029e-15	ACTBL2	chr5	-	57480016	57482809	2794	protein_coding	actin_beta-like_2
ENSG00000231826	1.38777878078145e-17	129.750953619133	10.0229933593461	6.30940901397139e-17	1.562529420029e-15	AC016735.2	chr2	-	43027853	43039547	2759	lincRNA	NA
ENSG00000196263	1.38777878078145e-17	129.750953619133	10.0229933593461	6.30940901397139e-17	1.562529420029e-15	ZNF471	chr19	+	56507843	56530221	6783	protein_coding	zinc_finger_protein_471
ENSG00000183145	149.780179009606	1.05955866386509	-6.98956273635803	6.31014810654744e-17	1.562529420029e-15	RIPPLY3	chr21	+	37006150	37019659	2319	protein_coding	ripply_transcriptional_repressor_3
ENSG00000246082	0.943449169558452	150.847924191131	7.13668512260508	6.31014810654744e-17	1.562529420029e-15	NUDT16P1	chr3	+	131361898	131365122	2312	unitary_pseudogene	nudix_hydrolase_16_pseudogene_1
ENSG00000174567	281.552660283905	8.44338646668029	-5.03970365630856	6.55998096759402e-17	1.62290318139578e-15	GOLT1A	chr1	-	204198160	204214092	1136	protein_coding	golgi_transport_1A
ENSG00000006062	29.3837161962256	578.06157018612	4.29210421352196	6.82098133909941e-17	1.6859265150335e-15	MAP3K14	chr17	-	45263121	45317040	5852	protein_coding	mitogen-activated_protein_kinase_kinase_kinase_14
ENSG00000111110	3234.58335770739	214.138835361778	-3.91620933946633	6.95991232541804e-17	1.71869043742878e-15	PPM1H	chr12	-	62643982	62935037	7063	protein_coding	protein_phosphatase_Mg2+/Mn2+_dependent_1H
ENSG00000147408	295.772712009534	9.49823147579758	-4.94316941378359	7.19899704783039e-17	1.77603455556744e-15	CSGALNACT1	chr8	-	19404161	19758029	6580	protein_coding	chondroitin_sulfate_N-acetylgalactosaminyltransferase_1
ENSG00000270872	0.943449169558452	149.793075665394	7.12656930555291	7.20530224649849e-17	1.77603455556744e-15	SRGAP2D	chr1	+	143975087	144068350	1021	unprocessed_pseudogene	SLIT-ROBO_Rho_GTPase_activating_protein_2D_(pseudogene)
ENSG00000196639	13.2676314239607	341.775505103255	4.67358854593061	7.28299310776715e-17	1.79354513373561e-15	HRH1	chr3	+	11137093	11263557	5546	protein_coding	histamine_receptor_H1
ENSG00000223865	1.38777878078145e-17	128.696105086998	10.0112275571431	7.34035819926087e-17	1.80273314390955e-15	HLA-DPB1	chr6	+	33075926	33087201	2791	protein_coding	major_histocompatibility_complex_class_II_DP_beta_1
ENSG00000196604	1.38777878078145e-17	128.696105086998	10.0112275571431	7.34035819926087e-17	1.80273314390955e-15	POTEF	chr2	-	130073535	130129222	4371	protein_coding	POTE_ankyrin_domain_family_member_F
ENSG00000115363	1.38777878078145e-17	128.696105086998	10.0112275571431	7.34035819926087e-17	1.80273314390955e-15	EVA1A	chr2	-	75469302	75569722	2744	protein_coding	eva-1_homolog_A_(C._elegans)
ENSG00000236699	166.844241673367	2.11437967028788	-6.22351038711814	7.70589309839281e-17	1.89078356043003e-15	ARHGEF38	chr4	+	105552620	105708093	7579	protein_coding	Rho_guanine_nucleotide_exchange_factor_38
ENSG00000120318	33.1757330515918	630.803995346975	4.24365856604184	8.06593849234441e-17	1.97732815804145e-15	ARAP3	chr5	-	141653401	141682221	6186	protein_coding	ArfGAP_with_RhoGAP_domain_ankyrin_repeat_and_PH_domain_3
ENSG00000134242	293.876705114041	9.49823147579758	-4.93389552651539	8.29370915181865e-17	2.03131844675696e-15	PTPN22	chr1	-	113813811	113871759	4503	protein_coding	protein_tyrosine_phosphatase_non-receptor_type_22_(lymphoid)
ENSG00000197016	1.38777878078145e-17	127.641256554483	9.99936501019713	8.54765395571823e-17	2.0878264182056e-15	ZNF470	chr19	+	56567511	56588911	9627	protein_coding	zinc_finger_protein_470
ENSG00000225383	1.38777878078145e-17	127.641256554483	9.99936501019713	8.54765395571823e-17	2.0878264182056e-15	SFTA1P	chr10	-	10784437	10794980	824	lincRNA	surfactant_associated_1_pseudogene
ENSG00000204767	1.38777878078145e-17	127.641256554483	9.99936501019713	8.54765395571823e-17	2.0878264182056e-15	FAM196B	chr5	-	169864264	169980740	2999	protein_coding	family_with_sequence_similarity_196_member_B
ENSG00000197321	3330.33170442008	223.632471991469	-3.89574481254956	8.5869672577282e-17	2.0955308513294e-15	SVIL	chr10	-	29457338	29736781	9937	protein_coding	supervillin
ENSG00000184232	105.224014196622	1646.62310265718	3.96630962666206	9.03103723156819e-17	2.20190732356662e-15	OAF	chr11	+	120210767	120230332	3176	protein_coding	out_at_first_homolog
ENSG00000059728	1458.97292775967	91.7764061663017	-3.98892489463218	9.37522239828791e-17	2.28376013723787e-15	MXD1	chr2	+	69897688	69942945	6351	protein_coding	MAX_dimerization_protein_1
ENSG00000038945	0.943449169558452	147.683378613098	7.10612236329374	9.41460860615726e-17	2.28921853628166e-15	MSR1	chr8	-	16107878	16567490	7812	protein_coding	macrophage_scavenger_receptor_1
ENSG00000151322	145.98816505884	1.05955866386509	-6.95259973009147	9.41460860615726e-17	2.28921853628166e-15	NPAS3	chr14	+	32934933	33804176	9241	protein_coding	neuronal_PAS_domain_protein_3
ENSG00000184347	4.73554534719345	199.370956141005	5.35778910441165	9.55628389736065e-17	2.32157433852457e-15	SLIT3	chr5	-	168661733	169301129	14260	protein_coding	slit_guidance_ligand_3
ENSG00000161905	437.02522501058	20.0467050958546	-4.43807858168447	9.88986178051031e-17	2.40045015997517e-15	ALOX15	chr17	-	4630902	4642294	3404	protein_coding	arachidonate_15-lipoxygenase
ENSG00000135373	125.132088113826	1.38777878078145e-17	-9.9708524300609	9.96282845169808e-17	2.41598589953679e-15	EHF	chr11	+	34621093	34661057	4386	protein_coding	ets_homologous_factor
ENSG00000081923	2783.33372368277	186.712773930349	-3.89705959896218	1.03875813562127e-16	2.51672523676219e-15	ATP8B1	chr18	-	57646426	57803101	6652	protein_coding	ATPase_aminophospholipid_transporter_class_I_type_8B_member_1
ENSG00000254471	1.38777878078145e-17	125.531559488286	9.97534322514724	1.16232998603144e-16	2.81106640388553e-15	RP11-885L14.1	chr11	+	79987513	79989630	2118	processed_pseudogene	NA
ENSG00000205663	124.184084606024	1.38777878078145e-17	-9.95989228651714	1.16232998603144e-16	2.81106640388553e-15	RP11-706O15.5	chrX	-	3891438	3920746	3700	lincRNA	NA
ENSG00000275964	476.841369455444	22.1564016332808	-4.42029660132524	1.19058714290268e-16	2.87682552827184e-15	RP11-61K9.3	chr13	+	19863858	19865048	1191	lincRNA	NA
ENSG00000158406	518.553520734885	25.3209467810738	-4.3496144164982	1.22207147939987e-16	2.9502577899281e-15	HIST1H4H	chr6	-	26277609	26285638	2163	protein_coding	histone_cluster_1_H4h
ENSG00000256229	317.576791282901	11.6079237420807	-4.75964416423096	1.22742202236427e-16	2.9605243519745e-15	ZNF486	chr19	+	20167228	20200490	4261	protein_coding	zinc_finger_protein_486
ENSG00000139329	1.38777878078145e-17	124.47671095459	9.96318065663899	1.35735179576826e-16	3.27098735698721e-15	LUM	chr12	-	91102629	91111831	3008	protein_coding	lumican
ENSG00000019549	3.7875259485201	178.273985777142	5.50923642483728	1.57022122432077e-16	3.78058799419946e-15	SNAI2	chr8	-	48917690	48921740	2282	protein_coding	snail_family_zinc_finger_2
ENSG00000196867	1.38777878078145e-17	123.421862420487	9.95091467980783	1.58663419370208e-16	3.80990005942746e-15	ZFP28	chr19	+	56538948	56556810	6974	protein_coding	ZFP28_zinc_finger_protein
ENSG00000178026	122.288077587259	1.38777878078145e-17	-9.93771899912871	1.58663419370208e-16	3.80990005942746e-15	LRRC75B	chr22	-	24585620	24593208	3422	protein_coding	leucine_rich_repeat_containing_75B
ENSG00000198354	1.38777878078145e-17	123.421862420487	9.95091467980783	1.58663419370208e-16	3.80990005942746e-15	DCAF12L2	chrX	-	126164531	126165951	1421	protein_coding	DDB1_and_CUL4_associated_factor_12-like_2
ENSG00000128510	1.89146593041347	161.396409434414	6.32059186030001	1.60083597746251e-16	3.84058211461335e-15	CPA4	chr7	+	130293134	130324180	3958	protein_coding	carboxypeptidase_A4
ENSG00000130558	142.196151097332	1.05955866386509	-6.91466474444321	1.62141966509073e-16	3.88650690567438e-15	OLFM1	chr9	+	135075243	135121179	6302	protein_coding	olfactomedin_1
ENSG00000181444	620.937891922325	33.7597348255035	-4.19624440218703	1.7142911418213e-16	4.10546846628358e-15	ZNF467	chr7	-	149764182	149773479	2734	protein_coding	zinc_finger_protein_467
ENSG00000196189	634.209940028593	34.8145833807673	-4.18251659604224	1.7642068227968e-16	4.2212600872705e-15	SEMA4A	chr1	+	156147366	156177752	6822	protein_coding	sema_domain_immunoglobulin_domain_(Ig)_transmembrane_domain_(TM)_and_short_cytoplasmic_domain_(semaphorin)_4A
ENSG00000189420	1.38777878078145e-17	122.36701388597	9.93854352117261	1.85646994093032e-16	4.43808230736943e-15	ZFP92	chrX	+	153418322	153426481	6105	protein_coding	ZFP92_zinc_finger_protein
ENSG00000175344	0.943449169558452	142.409135977352	7.0537000676603	1.86092625361778e-16	4.44479515988105e-15	CHRNA7	chr15	+	32030488	32172521	5766	protein_coding	cholinergic_receptor_nicotinic_alpha_7
ENSG00000240065	20.8516752476805	439.876416153651	4.39034422927377	1.86953882922366e-16	4.46141451936684e-15	PSMB9	chr6	+	32844136	32859585	3072	protein_coding	proteasome_subunit_beta_9
ENSG00000166147	149.780179009606	2191.97977785154	3.87015120613631	1.88010318666811e-16	4.48265804877917e-15	FBN1	chr15	-	48408306	48645849	16057	protein_coding	fibrillin_1
ENSG00000198467	289.136687873659	4093.87162552918	3.82304021996684	1.93119865721802e-16	4.60041545852838e-15	TPM2	chr9	-	35681992	35691020	4047	protein_coding	tropomyosin_2_(beta)
ENSG00000124429	409.533125244909	18.9918569258258	-4.42187731201024	1.96407359372882e-16	4.67459916403279e-15	POF1B	chrX	-	85277396	85379743	4029	protein_coding	premature_ovarian_failure_1B
ENSG00000137834	656.962022491978	36.924280507758	-4.14876159527785	2.04999421895851e-16	4.87479224942109e-15	SMAD6	chr15	+	66702228	66782848	8563	protein_coding	SMAD_family_member_6
ENSG00000171766	8.5275940924434	252.11338183344	4.86477409293538	2.09527963583278e-16	4.97808904492217e-15	GATM	chr15	-	45361124	45402327	6644	protein_coding	glycine_amidinotransferase_(L-arginine:glycine_amidinotransferase)
ENSG00000181274	1609.70547364933	106.544285813075	-3.91576023049944	2.10207070699104e-16	4.98982734900709e-15	FRAT2	chr10	-	97332497	97334709	2213	protein_coding	frequently_rearranged_in_advanced_T-cell_lymphomas_2
ENSG00000010319	6.63157350604578	222.57762347749	5.04174006358998	2.13623022269994e-16	5.06645419396011e-15	SEMA3G	chr3	-	52433053	52445085	5011	protein_coding	sema_domain_immunoglobulin_domain_(Ig)_short_basic_domain_secreted_(semaphorin)_3G
ENSG00000183186	120.392070564129	1.38777878078145e-17	-9.91519959619852	2.1743586294458e-16	5.14782746283015e-15	C2CD4C	chr19	-	405438	409170	3129	protein_coding	C2_calcium-dependent_domain_containing_4C
ENSG00000261069	1.38777878078145e-17	121.31216535103	9.92606536123372	2.1743586294458e-16	5.14782746283015e-15	RP11-701H24.4	chr15	+	25087661	25088896	1236	lincRNA	NA
ENSG00000168461	11546.6774556623	841.773695863685	-3.77771163399369	2.18529394375311e-16	5.16917863923213e-15	RAB31	chr18	+	9708165	9862551	5586	protein_coding	RAB31_member_RAS_oncogene_family
ENSG00000261226	174.428269472836	3.16919693313913	-5.72974794596068	2.20850466411097e-16	5.21950366103561e-15	RP11-830F9.7	chr16	-	88936779	88939651	2873	sense_intronic	NA
ENSG00000197977	192.440335396739	2753.15918051784	3.83769975861401	2.26640733575071e-16	5.35165851277178e-15	ELOVL2	chr6	-	10980759	11044314	3997	protein_coding	ELOVL_fatty_acid_elongase_2
ENSG00000136859	1.89146593041347	158.231863864008	6.29204500657319	2.32622425107333e-16	5.48809826373082e-15	ANGPTL2	chr9	-	127087332	127122883	3889	protein_coding	angiopoietin_like_2
ENSG00000035115	2463.85656680418	170.890046133594	-3.84883895748891	2.37483799302005e-16	5.59789172375689e-15	SH3YL1	chr2	-	217730	266398	11165	protein_coding	SH3_and_SYLF_domain_containing_1
ENSG00000111490	1098.7316230127	69.6245864241491	-3.97777869786035	2.47470345973182e-16	5.82819681180159e-15	TBC1D30	chr12	+	64781193	64881032	8648	protein_coding	TBC1_domain_family_member_30
ENSG00000162755	234.152487669985	6.33370047263656	-5.18192613897011	2.53576736919013e-16	5.96679780781684e-15	KLHDC9	chr1	+	161098361	161100346	1720	protein_coding	kelch_domain_containing_9
ENSG00000171208	273.968632687384	3840.70798524879	3.80865471141052	2.5402008806678e-16	5.97201891439301e-15	NETO2	chr16	-	47077703	47143997	7481	protein_coding	neuropilin_and_tolloid_like_2
ENSG00000227507	306.200749928356	11.6079237420807	-4.70703829151952	2.55562438970479e-16	6.00304593142677e-15	LTB	chr6	-	31580525	31582522	1535	protein_coding	lymphotoxin_beta
ENSG00000262943	219.932435808241	5.2788609071888	-5.34905427645217	2.56932566937386e-16	6.0299770235279e-15	ALOX12P2	chr17	+	6853861	6954107	5655	transcribed_unprocessed_pseudogene	arachidonate_12-lipoxygenase_pseudogene_2
ENSG00000159208	361.184949717336	15.8273130116772	-4.50184701123105	2.74005800292973e-16	6.42507861800026e-15	CIART	chr1	+	150282543	150287093	2696	protein_coding	circadian_associated_repressor_of_transcription
ENSG00000116741	7.57958445112432	234.180957125761	4.92570490997024	2.76698321822304e-16	6.48257771178129e-15	RGS2	chr1	+	192809039	192812283	2096	protein_coding	regulator_of_G-protein_signaling_2
ENSG00000154822	0.943449169558452	139.244590392279	7.02130730467171	2.82639698603631e-16	6.61602613936242e-15	PLCL2	chr3	+	16802651	17090594	5146	protein_coding	phospholipase_C_like_2
ENSG00000112208	106.17201773039	1573.83855605846	3.8881678882148	2.88922617128858e-16	6.75723095706574e-15	BAG2	chr6	+	57172326	57189833	6651	protein_coding	BCL2_associated_athanogene_2
ENSG00000147883	34.1237371789089	606.542479775133	4.14659467252875	2.98275780543063e-16	6.96993474707473e-15	CDKN2B	chr9	-	22002903	22009363	4058	protein_coding	cyclin-dependent_kinase_inhibitor_2B_(p15_inhibits_CDK4)
ENSG00000259363	1.38777878078145e-17	119.202468279856	9.90078051964752	2.9918258344817e-16	6.97144827951427e-15	CTD-2054N24.2	chr15	+	99807023	99877148	1291	lincRNA	NA
ENSG00000101670	1.38777878078145e-17	119.202468279856	9.90078051964752	2.9918258344817e-16	6.97144827951427e-15	LIPG	chr18	+	49560699	49599182	13112	protein_coding	lipase_endothelial
ENSG00000144824	102.380003585319	1517.93158548123	3.88839583710486	2.99319102576471e-16	6.97144827951427e-15	PHLDB2	chr3	+	111732497	111976517	12109	protein_coding	pleckstrin_homology-like_domain_family_B_member_2
ENSG00000186479	1.89146593041347	156.122166815874	6.27269504937007	2.99374660968535e-16	6.97144827951427e-15	RGS7BP	chr5	+	64506257	64612312	4379	protein_coding	regulator_of_G-protein_signaling_7_binding_protein
ENSG00000126562	9.47560276457628	262.661866945043	4.7739591548342	3.01152640568963e-16	7.00680078134829e-15	WNK4	chr17	+	42780678	42796936	5089	protein_coding	WNK_lysine_deficient_protein_kinase_4
ENSG00000104325	3101.86287711418	220.467926449217	-3.81376773697327	3.04353439991087e-16	7.07516798517212e-15	DECR1	chr8	+	90001405	90052092	3507	protein_coding	24-dienoyl-CoA_reductase_1_mitochondrial
ENSG00000237438	2.83950028546094	172.999743175568	5.86573279042723	3.12087954493821e-16	7.2487198801726e-15	CECR7	chr22	+	17036570	17060825	4354	lincRNA	cat_eye_syndrome_chromosome_region_candidate_7_(non-protein_coding)
ENSG00000120738	1739.5819439939	118.147619743605	-3.87871786697947	3.14320113124369e-16	7.29428241868479e-15	EGR1	chr5	+	138465490	138469315	3138	protein_coding	early_growth_response_1
ENSG00000225614	200.972366582627	4.22402546552972	-5.53268454749184	3.43376171808328e-16	7.96172128029524e-15	ZNF469	chr16	+	88427471	88440757	13287	protein_coding	zinc_finger_protein_469
ENSG00000081842	398.157083954044	18.9918569258258	-4.38124788693812	3.47630235327064e-16	8.05343378507698e-15	PCDHA6	chr5	+	140827958	141012344	6133	protein_coding	protocadherin_alpha_6
ENSG00000106829	68.2518745239287	1053.79824476808	3.94602248210872	3.62843904644395e-16	8.39866844003499e-15	TLE4	chr9	+	79571773	79726882	8187	protein_coding	transducin_like_enhancer_of_split_4
ENSG00000125864	342.224880848797	14.7724653244214	-4.5228117886033	3.72069381071711e-16	8.60482240993117e-15	BFSP1	chr20	-	17493905	17569220	3226	protein_coding	beaded_filament_structural_protein_1
ENSG00000130518	244.580525675917	7.38854262067175	-5.02635255271832	3.73589668147994e-16	8.6325783986965e-15	KIAA1683	chr19	-	18257097	18274509	9154	protein_coding	KIAA1683
ENSG00000157214	0.943449169558452	137.134893333969	6.99930087741723	3.74923335829547e-16	8.64857371597909e-15	STEAP2	chr7	+	90167590	90238137	8715	protein_coding	STEAP2_metalloreductase
ENSG00000184613	0.943449169558452	137.134893333969	6.99930087741723	3.74923335829547e-16	8.64857371597909e-15	NELL2	chr12	-	44508275	44921848	6424	protein_coding	neural_EGFL_like_2
ENSG00000099250	1933.92264777692	135.025196274332	-3.83904181956165	3.83703773811702e-16	8.84355210650116e-15	NRP1	chr10	-	33177492	33336262	11522	protein_coding	neuropilin_1
ENSG00000124134	2.83950028546094	170.890046133594	5.84804363066131	3.94056099617194e-16	9.07439520262789e-15	KCNS1	chr20	-	45092310	45101112	4538	protein_coding	potassium_voltage-gated_channel_modifier_subfamily_S_member_1
ENSG00000104833	17.0596547238187	369.201566278983	4.42533064513379	4.03289561331076e-16	9.27910094782747e-15	TUBB4A	chr19	-	6494319	6502848	3466	protein_coding	tubulin_beta_4A_class_IVa
ENSG00000135338	25.5916986392898	477.850962320773	4.2159098166454	4.0508362182961e-16	9.31243388427728e-15	LCA5	chr6	-	79484991	79537458	5964	protein_coding	Leber_congenital_amaurosis_5
ENSG00000273760	1.38777878078145e-17	117.092771206901	9.87504461585759	4.13368785640788e-16	9.48672567965062e-15	CH17-360D5.3	chr10	-	47970043	47973496	826	lincRNA	NA
ENSG00000266302	1.38777878078145e-17	117.092771206901	9.87504461585759	4.13368785640788e-16	9.48672567965062e-15	RP11-219A15.1	chr17	+	16690261	16804453	8804	protein_coding	NA
ENSG00000060558	14.215637608667	328.062474507079	4.51589206489906	4.28187911302588e-16	9.8184653198857e-15	GNA15	chr19	+	3136193	3163769	2613	protein_coding	guanine_nucleotide_binding_protein_(G_protein)_alpha_15_(Gq_class)
ENSG00000041353	1333.83647455199	89.6667090633033	-3.89307202255312	4.29737369263529e-16	9.8456226844183e-15	RAB27B	chr18	+	54717860	54895516	7432	protein_coding	RAB27B_member_RAS_oncogene_family
ENSG00000158125	0.943449169558452	136.080044804319	6.98817049039591	4.32335349365558e-16	9.89673601951752e-15	XDH	chr2	-	31334321	31414715	6037	protein_coding	xanthine_dehydrogenase
ENSG00000156113	3.7875259485201	169.835197612306	5.43932402481731	4.43152937582142e-16	1.0135760911654e-14	KCNMA1	chr10	-	76869601	77638595	19248	protein_coding	potassium_channel_calcium_activated_large_conductance_subfamily_M_alpha_member_1
ENSG00000105246	6.63157350604578	214.138835361778	4.98600865889483	4.50737112853284e-16	1.03004889705099e-14	EBI3	chr19	+	4229498	4237531	1284	protein_coding	Epstein-Barr_virus_induced_3
ENSG00000027869	4.73554534719345	184.603076893067	5.24683000597325	4.65082339125524e-16	1.06193144427255e-14	SH2D2A	chr1	-	156806243	156816862	2512	protein_coding	SH2_domain_containing_2A
ENSG00000105204	907.234929330481	58.021252115322	-3.96404165308962	4.82788843303611e-16	1.10142842204105e-14	DYRK1B	chr19	-	39825350	39834201	3192	protein_coding	dual_specificity_tyrosine-(Y)-phosphorylation_regulated_kinase_1B
ENSG00000163141	269.228615435881	9.49823147579758	-4.80757431406269	4.83896540175175e-16	1.10302232479829e-14	BNIPL	chr1	+	151036570	151047600	2892	protein_coding	BCL2/adenovirus_E1B_19kD_interacting_protein_like
ENSG00000136167	268.280611985224	9.49823147579758	-4.80248779976773	5.22231226657153e-16	1.18939926165851e-14	LCP1	chr13	-	46125920	46211871	5061	protein_coding	lymphocyte_cytosolic_protein_1_(L-plastin)
ENSG00000115380	11.3716180425464	282.703988638787	4.62009162181129	5.54949580151392e-16	1.26284982095886e-14	EFEMP1	chr2	-	55865967	55924139	3962	protein_coding	EGF_containing_fibulin-like_extracellular_matrix_protein_1
ENSG00000138639	3.7875259485201	167.725500569118	5.42130342988081	5.61391708756452e-16	1.2742835705662e-14	ARHGAP24	chr4	+	85475114	86002670	7908	protein_coding	Rho_GTPase_activating_protein_24
ENSG00000144451	2.83950028546094	167.725500569118	5.82109645154031	5.61391708756452e-16	1.2742835705662e-14	SPAG16	chr2	+	213284379	214410501	8257	protein_coding	sperm_associated_antigen_16
ENSG00000228696	3.7875259485201	167.725500569118	5.42130342988081	5.61391708756452e-16	1.2742835705662e-14	ARL17B	chr17	-	46274784	46361797	4219	protein_coding	ADP_ribosylation_factor_like_GTPase_17B
ENSG00000212916	114.704049466602	1.38777878078145e-17	-9.84545223622006	5.7356489557757e-16	1.29754622266315e-14	MAP10	chr1	+	232804892	232808407	3516	protein_coding	microtubule_associated_protein_10
ENSG00000255248	1.38777878078145e-17	116.037922669736	9.86200242977424	5.7356489557757e-16	1.29754622266315e-14	RP11-166D19.1	chr11	-	122028355	122116323	7117	sense_overlapping	NA
ENSG00000171903	114.704049466602	1.38777878078145e-17	-9.84545223622006	5.7356489557757e-16	1.29754622266315e-14	CYP4F11	chr19	-	15912367	15934867	4027	protein_coding	cytochrome_P450_family_4_subfamily_F_member_11
ENSG00000145934	1.38777878078145e-17	116.037922669736	9.86200242977424	5.7356489557757e-16	1.29754622266315e-14	TENM2	chr5	+	167284799	168264157	11070	protein_coding	teneurin_transmembrane_protein_2
ENSG00000162599	767.878424434839	47.4727662977756	-4.01229915200096	6.14265416084036e-16	1.38845609472943e-14	NFIA	chr1	+	60865259	61462793	10872	protein_coding	nuclear_factor_I/A
ENSG00000165511	2.83950028546094	166.670652047211	5.81200103486323	6.32393372513684e-16	1.42775764460113e-14	C10orf25	chr10	-	44997698	45000888	3078	antisense	chromosome_10_open_reading_frame_25
ENSG00000008311	40.7597653317094	663.504298938715	4.02058359983148	6.32711705591615e-16	1.42775764460113e-14	AASS	chr7	-	122075647	122144280	4591	protein_coding	aminoadipate-semialdehyde_synthase
ENSG00000061337	0.943449169558452	133.970347744002	6.96564874318896	6.66190365663488e-16	1.50204760873592e-14	LZTS1	chr8	-	20246165	20303963	5706	protein_coding	leucine_zipper_putative_tumor_suppressor_1
ENSG00000165410	302.40873614091	4031.6355639604	3.73622038470211	6.68079918767811e-16	1.50504954799439e-14	CFL2	chr14	-	34706769	34714823	7179	protein_coding	cofilin_2_(muscle)
ENSG00000184451	12.3196249236669	293.252473732321	4.55864834460907	6.71030787620919e-16	1.51043541059981e-14	CCR10	chr17	-	42678889	42683917	2619	protein_coding	chemokine_(C-C_motif)_receptor_10
ENSG00000273079	1.38777878078145e-17	114.983074132102	9.84884126390014	6.76724049458426e-16	1.52198004317731e-14	GRIN2B	chr12	-	13537337	13981957	30672	protein_coding	glutamate_receptor_ionotropic_N-methyl_D-aspartate_2B
ENSG00000108821	619.041885049834	8090.69259635021	3.70787469211289	6.88733252036248e-16	1.54769840620079e-14	COL1A1	chr17	-	50183289	50201632	9819	protein_coding	collagen_type_I_alpha_1
ENSG00000158164	3.7875259485201	165.61580352509	5.40305489081815	7.12779373268283e-16	1.60040038131162e-14	TMSB15A	chrX	-	102513676	102516784	685	protein_coding	thymosin_beta_15a
ENSG00000166816	384.885035774243	18.9918569258258	-4.33235387731569	7.32886573685535e-16	1.64417798219668e-14	LDHD	chr16	-	75111860	75116771	2359	protein_coding	lactate_dehydrogenase_D
ENSG00000180264	8.5275940924434	237.345502664203	4.77773289852609	7.35647109963156e-16	1.64899916602381e-14	ADGRD2	chr9	+	124451600	124478589	5546	protein_coding	adhesion_G_protein-coupled_receptor_D2
ENSG00000105409	65.4078635502135	978.904001133869	3.90096173232977	7.70576852165894e-16	1.72586174381275e-14	ATP1A3	chr19	-	41966582	41997497	5122	protein_coding	ATPase_Na+/K+_transporting_alpha_3_polypeptide
ENSG00000087253	112.808042424002	1.38777878078145e-17	-9.82143311811161	7.99318985954514e-16	1.78726664803063e-14	LPCAT2	chr16	+	55508998	55586670	7439	protein_coding	lysophosphatidylcholine_acyltransferase_2
ENSG00000165556	1.38777878078145e-17	113.92822559399	9.83555892740273	7.99318985954514e-16	1.78726664803063e-14	CDX2	chr13	-	27962137	27971139	4122	protein_coding	caudal_type_homeobox_2
ENSG00000166813	42.655773182822	680.381874984014	3.99142342237188	8.35628719580872e-16	1.8669067151796e-14	KIF7	chr15	-	89608789	89655451	5001	protein_coding	kinesin_family_member_7
ENSG00000145147	1.89146593041347	148.738227139384	6.20285025472533	8.43023929128047e-16	1.88031292579544e-14	SLIT2	chr4	+	20253260	20620561	9712	protein_coding	slit_guidance_ligand_2
ENSG00000126259	1.89146593041347	148.738227139384	6.20285025472533	8.43023929128047e-16	1.88031292579544e-14	KIRREL2	chr19	+	35855861	35867109	3382	protein_coding	kin_of_IRRE_like_2_(Drosophila)
ENSG00000119699	703.414190839093	43.2533719659531	-4.01974991160935	8.78156001352622e-16	1.95705411012188e-14	TGFB3	chr14	-	75958099	75982991	4914	protein_coding	transforming_growth_factor_beta_3
ENSG00000109814	20455.0657124854	1607.59370810448	-3.66938464853043	8.8416387859943e-16	1.96881611480696e-14	UGDH	chr4	-	39498755	39528311	4045	protein_coding	UDP-glucose_6-dehydrogenase
ENSG00000235501	0.943449169558452	131.86065068229	6.94276982849417	8.92505135571816e-16	1.9857502876097e-14	RP4-639F20.1	chr1	+	94927566	94963270	1012	antisense	NA
ENSG00000129757	10.4236106947186	262.661866945043	4.63816108039372	8.96357131884703e-16	1.99267653902744e-14	CDKN1C	chr11	-	2883213	2885881	2586	protein_coding	cyclin-dependent_kinase_inhibitor_1C_(p57_Kip2)
ENSG00000141837	4.73554534719345	178.273985777142	5.19653294056172	9.01614614658704e-16	2.0027133195129e-14	CACNA1A	chr19	-	13206442	13623990	10920	protein_coding	calcium_channel_voltage-dependent_P/Q_type_alpha_1A_subunit
ENSG00000167741	111.860038900679	1.38777878078145e-17	-9.80927191693999	9.45180114778336e-16	2.09603017887439e-14	GGT6	chr17	-	4556927	4560818	3161	protein_coding	gamma-glutamyltransferase_6
ENSG00000203799	111.860038900679	1.38777878078145e-17	-9.80927191693999	9.45180114778336e-16	2.09603017887439e-14	CCDC162P	chr6	+	109285485	109355063	5378	unitary_pseudogene	coiled-coil_domain_containing_162_pseudogene
ENSG00000158163	8.5275940924434	234.180957125761	4.75837782147918	9.53004680243616e-16	2.11164537448228e-14	DZIP1L	chr3	-	138061990	138115818	5045	protein_coding	DAZ_interacting_zinc_finger_protein_1-like
ENSG00000086205	1.89146593041347	147.683378613098	6.19259056024839	9.62434771880972e-16	2.12904151423645e-14	FOLH1	chr11	-	49146635	49208670	3824	protein_coding	folate_hydrolase_(prostate-specific_membrane_antigen)_1
ENSG00000188933	1.89146593041347	147.683378613098	6.19259056024839	9.62434771880972e-16	2.12904151423645e-14	USP32P1	chr17	+	16786489	16804455	7676	transcribed_unprocessed_pseudogene	ubiquitin_specific_peptidase_32_pseudogene_1
ENSG00000168421	129.87210563788	1.05955866386509	-6.78399819410431	1.03437493152079e-15	2.28630773798275e-14	RHOH	chr4	+	40191053	40246967	6608	protein_coding	ras_homolog_family_member_H
ENSG00000143653	194.336342329007	2589.65766282694	3.73524204689296	1.04596364894914e-15	2.31002913657351e-14	SCCPDH	chr1	+	246724047	246768137	2503	protein_coding	saccharopine_dehydrogenase_(putative)
ENSG00000115414	3100.91487368137	38972.437315072	3.65163268571064	1.0999167693561e-15	2.42719767614211e-14	FN1	chr2	-	215360440	215436172	17315	protein_coding	fibronectin_1
ENSG00000226419	5.68356074469745	190.932168002983	5.03858073125703	1.17582143335783e-15	2.59257569680518e-14	SLC16A1-AS1	chr1	+	112956415	113047055	10138	antisense	SLC16A1_antisense_RNA_1
ENSG00000130475	356.444932502266	4600.19890608577	3.68946007581833	1.18409221100718e-15	2.60867896748527e-14	FCHO1	chr19	+	17747718	17788568	5694	protein_coding	FCH_domain_only_1
ENSG00000157502	0.943449169558452	129.750953619133	6.91952223502852	1.19984515550606e-15	2.64122648680625e-14	MUM1L1	chrX	+	106168305	106208956	4343	protein_coding	melanoma_associated_antigen_(mutated)_1-like_1
ENSG00000164050	1951.93471300472	144.518833032532	-3.7544710937449	1.29037307657495e-15	2.83818926451224e-14	PLXNB1	chr3	-	48403854	48430051	9733	protein_coding	plexin_B1
ENSG00000279041	109.016028322243	1.38777878078145e-17	-9.77216086606833	1.32613506300054e-15	2.9120975658691e-14	CTD-2373N4.3	chr8	+	30552345	30553766	1422	TEC	NA
ENSG00000261742	1.38777878078145e-17	110.763679976699	9.79496205587782	1.32613506300054e-15	2.9120975658691e-14	LINC00922	chr16	-	65284499	65576300	2089	lincRNA	long_intergenic_non-protein_coding_RNA_922
ENSG00000003989	11938.2028733579	953.58763708661	-3.64591005811165	1.33034824020413e-15	2.91897238774162e-14	SLC7A2	chr8	+	17497088	17570573	7905	protein_coding	solute_carrier_family_7_(cationic_amino_acid_transporter_y+_system)_member_2
ENSG00000077782	382.989028890746	4909.26951692336	3.67968220302199	1.34075646373886e-15	2.93941778871399e-14	FGFR1	chr8	-	38411138	38468834	12698	protein_coding	fibroblast_growth_factor_receptor_1
ENSG00000204580	12364.8044180621	989.452486153261	-3.64330495786648	1.37576049325942e-15	3.01370897329274e-14	DDR1	chr6	+	30876421	30900156	9122	protein_coding	discoidin_domain_receptor_tyrosine_kinase_1
ENSG00000124313	473.997359139429	26.3757952266003	-4.16142378394441	1.39298064589677e-15	3.04895422867308e-14	IQSEC2	chrX	-	53232876	53321324	6962	protein_coding	IQ_motif_and_Sec7_domain_2
ENSG00000171462	18.007660057365	360.76277822708	4.31453244434622	1.42995811784745e-15	3.12735203616174e-14	DLK2	chr6	-	43450352	43456632	2236	protein_coding	delta-like_2_homolog_(Drosophila)
ENSG00000198910	176.32427641848	2329.11008301756	3.7224936705077	1.43160161168944e-15	3.1284091621408e-14	L1CAM	chrX	-	153861514	153909223	7423	protein_coding	L1_cell_adhesion_molecule
ENSG00000091409	283.448667181958	3644.50616403028	3.68395418678355	1.52267093287601e-15	3.32472424096636e-14	ITGA6	chr2	+	172427354	172506282	6533	protein_coding	integrin_subunit_alpha_6
ENSG00000160352	410.481128685575	5210.95618825166	3.66573965943412	1.54475390780166e-15	3.37021309690773e-14	ZNF714	chr19	+	21082159	21125270	8033	protein_coding	zinc_finger_protein_714
ENSG00000160111	421.857169970856	22.1564016332808	-4.24359274526038	1.55846624863626e-15	3.39738082948466e-14	CPAMD8	chr19	-	16892947	17026815	10199	protein_coding	C3_and_PZP-like_alpha-2-macroglobulin_domain_containing_8
ENSG00000198795	1.38777878078145e-17	109.708831436587	9.78117187205305	1.57354832102302e-15	3.41920258055655e-14	ZNF521	chr18	-	25061926	25352190	6223	protein_coding	zinc_finger_protein_521
ENSG00000255774	108.068024793163	1.38777878078145e-17	-9.75957530213553	1.57354832102302e-15	3.41920258055655e-14	AP000439.3	chr11	-	69477133	69479940	726	lincRNA	NA
ENSG00000223808	108.068024793163	1.38777878078145e-17	-9.75957530213553	1.57354832102302e-15	3.41920258055655e-14	RP11-428L9.2	chr10	+	8970125	8973468	677	lincRNA	NA
ENSG00000155961	108.068024793163	1.38777878078145e-17	-9.75957530213553	1.57354832102302e-15	3.41920258055655e-14	RAB39B	chrX	-	155258241	155264589	3505	protein_coding	RAB39B_member_RAS_oncogene_family
ENSG00000117477	4.73554534719345	174.054591696262	5.16200018983945	1.58678613513634e-15	3.44519121739826e-14	CCDC181	chr1	-	169394870	169460669	3961	protein_coding	coiled-coil_domain_containing_181
ENSG00000166257	1.89146593041347	143.463984505092	6.15080621864086	1.64658898735926e-15	3.57215757305951e-14	SCN3B	chr11	-	123629187	123655244	9464	protein_coding	sodium_channel_voltage_gated_type_III_beta_subunit
ENSG00000103150	853.19873356582	58.021252115322	-3.87546029922106	1.76977606808169e-15	3.83631683696871e-14	MLYCD	chr16	+	83899126	83927026	16161	protein_coding	malonyl-CoA_decarboxylase
ENSG00000139971	5.68356074469745	186.712773930349	5.00636169509647	1.79682253454881e-15	3.89181658366613e-14	C14orf37	chr14	-	57999735	58298139	7565	protein_coding	chromosome_14_open_reading_frame_37
ENSG00000188042	56.8758302912126	840.718847361455	3.88266864022681	1.84482624279461e-15	3.99258302272868e-14	ARL4C	chr2	-	234493041	234497053	4013	protein_coding	ADP_ribosylation_factor_like_GTPase_4C
ENSG00000258405	1.38777878078145e-17	108.653982895952	9.76724859983893	1.86932808061381e-15	4.03912668444166e-14	ZNF578	chr19	+	52453576	52512154	7189	protein_coding	zinc_finger_protein_578
ENSG00000274471	1.38777878078145e-17	108.653982895952	9.76724859983893	1.86932808061381e-15	4.03912668444166e-14	RP11-228M15.1	chr15	+	23309607	23313276	883	unprocessed_pseudogene	NA
ENSG00000079931	0.943449169558452	126.586408021581	6.88393299001668	1.88274814945157e-15	4.06161492784888e-14	MOXD1	chr6	-	132296055	132401545	5293	protein_coding	monooxygenase_DBH-like_1
ENSG00000120949	0.943449169558452	126.586408021581	6.88393299001668	1.88274814945157e-15	4.06161492784888e-14	TNFRSF8	chr1	+	12063377	12144207	3738	protein_coding	tumor_necrosis_factor_receptor_superfamily_member_8
ENSG00000117519	527.08555167381	6566.43651221607	3.63867448765909	2.05782647172795e-15	4.43575928350248e-14	CNN3	chr1	-	94896949	94927278	2838	protein_coding	calponin_3_acidic
ENSG00000183034	0.943449169558452	125.531559488286	6.87187210082969	2.19182225937357e-15	4.72082101008527e-14	OTOP2	chr17	+	74924275	74933912	2778	protein_coding	otopetrin_2
ENSG00000188883	106.17201773039	1.38777878078145e-17	-9.73406993059794	2.22336748982098e-15	4.78494235678473e-14	KLRG2	chr7	-	139452690	139483712	2197	protein_coding	killer_cell_lectin-like_receptor_subfamily_G_member_2
ENSG00000125462	5.68356074469745	184.603076893067	4.98997827229951	2.2272227875634e-15	4.78941704062478e-14	C1orf61	chr1	-	156404250	156430701	12314	protein_coding	chromosome_1_open_reading_frame_61
ENSG00000146122	4.73554534719345	170.890046133594	5.13554712472625	2.24135214869721e-15	4.81596032205329e-14	DAAM2	chr6	+	39792298	39904877	12955	protein_coding	dishevelled_associated_activator_of_morphogenesis_2
ENSG00000167106	7992.6125865378	647.68157139501	-3.6250660922772	2.33325782032955e-15	5.00944509418842e-14	FAM102A	chr9	-	127940579	127980513	6100	protein_coding	family_with_sequence_similarity_102_member_A
ENSG00000183722	13.2676314239607	289.033079695549	4.43186673786912	2.41110852652841e-15	5.17247036804813e-14	LHFP	chr13	-	39342892	39603528	2327	protein_coding	lipoma_HMGIC_fusion_partner
ENSG00000099994	424.701180291421	23.2112499784401	-4.18653658057634	2.48161402296554e-15	5.31949155352057e-14	SUSD2	chr22	+	24181259	24189110	5279	protein_coding	sushi_domain_containing_2
ENSG00000237862	1.38777878078145e-17	106.544285813075	9.73899233800964	2.64767426268758e-15	5.66644318790741e-14	RP1-63G5.7	chr22	-	37352190	37354839	1965	sense_intronic	NA
ENSG00000179046	1.38777878078145e-17	106.544285813075	9.73899233800964	2.64767426268758e-15	5.66644318790741e-14	TRIML2	chr4	-	188091273	188109603	3050	protein_coding	tripartite_motif_family_like_2
ENSG00000117984	16084.7698878733	1331.22340071257	-3.59475198729123	2.72914062450874e-15	5.83616225856483e-14	CTSD	chr11	-	1752752	1763992	2999	protein_coding	cathepsin_D
ENSG00000108370	5.68356074469745	182.493379855118	4.97340665816313	2.7658226520002e-15	5.90991867146097e-14	RGS9	chr17	+	65137431	65227703	3664	protein_coding	regulator_of_G-protein_signaling_9
ENSG00000106665	143.144154588759	1858.64765143522	3.69750453130558	2.83239411322231e-15	6.04737447800102e-14	CLIP2	chr7	+	74289475	74405943	7315	protein_coding	CAP-Gly_domain_containing_linker_protein_2
ENSG00000133985	604.821833504751	39.0339776509311	-3.94957873402533	2.85461914498255e-15	6.09000473604426e-14	TTC9	chr14	+	70641787	70675360	5217	protein_coding	tetratricopeptide_repeat_domain_9
ENSG00000124151	28901.7762975643	2404.00432660724	-3.58758106316049	2.89638547986263e-15	6.17422378260677e-14	NCOA3	chr20	+	47501902	47656877	8402	protein_coding	nuclear_receptor_coactivator_3
ENSG00000206337	6.63157350604578	195.151562073159	4.85213597617308	2.91718409787547e-15	6.20874399236858e-14	HCP5	chr6	+	31400702	31477506	3138	sense_overlapping	HLA_complex_P5_(non-protein_coding)
ENSG00000125850	194.336342329007	5.2788609071888	-5.17066115509817	2.91718409787547e-15	6.20874399236858e-14	OVOL2	chr20	-	17956979	18059188	2175	protein_coding	ovo-like_zinc_finger_2
ENSG00000203668	165.896238196422	2130.7985647766	3.68199953849244	2.9569227514425e-15	6.28835795862763e-14	CHML	chr1	-	241628853	241635930	7078	protein_coding	choroideremia-like_(Rab_escort_protein_2)
ENSG00000108395	24018.6106158892	2001.05219911564	-3.58524307234266	3.03344550338283e-15	6.4460119341388e-14	TRIM37	chr17	-	58982638	59106921	5482	protein_coding	tripartite_motif_containing_37
ENSG00000111907	2933.11826607165	233.126108612764	-3.65257242610248	3.201433009706e-15	6.79762539682929e-14	TPD52L1	chr6	+	125119049	125264407	7595	protein_coding	tumor_protein_D52-like_1
ENSG00000124813	232.256480757569	8.44338646668029	-4.76215815696415	3.27900923595104e-15	6.95686570075969e-14	RUNX2	chr6	+	45328157	45664349	8192	protein_coding	runt-related_transcription_factor_2
ENSG00000141232	11768.5102589087	982.068546639705	-3.58280339376493	3.37990755877725e-15	7.16529773820655e-14	TOB1	chr17	-	50862223	50867978	2521	protein_coding	transducer_of_ERBB2_1
ENSG00000273983	179.168286833981	4.22402546552972	-5.36711548538472	3.44112915378547e-15	7.28935496944062e-14	HIST1H3G	chr6	-	26269405	26271815	2411	protein_coding	histone_cluster_1_H3g
ENSG00000166796	0.943449169558452	122.36701388597	6.83507239685506	3.47764311027762e-15	7.3609202599487e-14	LDHC	chr11	+	18412307	18452058	2095	protein_coding	lactate_dehydrogenase_C
ENSG00000065361	8676.12306150518	718.356421081429	-3.59405881744452	3.57684586393667e-15	7.56495886799343e-14	ERBB3	chr12	+	56079857	56103505	8658	protein_coding	erb-b2_receptor_tyrosine_kinase_3
ENSG00000248498	103.328007124128	1.38777878078145e-17	-9.69494595793122	3.76863355100494e-15	7.96433952479618e-14	ASNSP1	chr8	-	46579213	46614523	1807	unprocessed_pseudogene	asparagine_synthetase_pseudogene_1
ENSG00000151150	2183.24755065665	172.999743175568	-3.65671696846648	3.94369656111769e-15	8.32777771864522e-14	ANK3	chr10	-	60026298	60733490	25614	protein_coding	ankyrin_3_node_of_Ranvier_(ankyrin_G)
ENSG00000121075	120.392070564129	1.05955866386509	-6.67475986605336	4.06388899398173e-15	8.57486937493828e-14	TBX4	chr17	+	61452404	61485110	3996	protein_coding	T-box_4
ENSG00000205002	12.3196249236669	268.990958008673	4.43411607247166	4.14727954869191e-15	8.74398282330149e-14	AARD	chr8	+	116938199	116944487	2412	protein_coding	alanine_and_arginine_rich_domain_containing_protein
ENSG00000118242	3969.28601811008	324.897928984	-3.61033423794	4.18070849243884e-15	8.80757696930513e-14	MREG	chr2	-	215942805	216034096	3056	protein_coding	melanoregulin
ENSG00000167971	229.412470387569	8.44338646668029	-4.74439306163948	4.25436969525413e-15	8.95576371602052e-14	CASKIN1	chr16	-	2177180	2196525	5889	protein_coding	CASK_interacting_protein_1
ENSG00000081181	31.2797246983149	497.893083901666	3.98693736987729	4.44721976704024e-15	9.35442497956374e-14	ARG2	chr14	+	67619798	67651720	2418	protein_coding	arginase_2
ENSG00000228742	1.38777878078145e-17	103.379740184592	9.69554238063598	4.50469479143558e-15	9.46793450864005e-14	RP5-884M6.1	chr7	+	106775011	106795564	3542	lincRNA	NA
ENSG00000135636	4.73554534719345	164.560955002754	5.08113984154507	4.53749425044168e-15	9.52944470073289e-14	DYSF	chr2	+	71453722	71686768	8386	protein_coding	dysferlin
ENSG00000146648	301.460732693835	3672.98707356207	3.60634095741077	4.56032409883161e-15	9.56993771588274e-14	EGFR	chr7	+	55019021	55256620	12961	protein_coding	epidermal_growth_factor_receptor
ENSG00000243587	327.056825736738	16.8821608614159	-4.26630090145777	4.58998533259678e-15	9.62469241670332e-14	C6orf183	chr6	+	109165833	109271014	4362	polymorphic_pseudogene	chromosome_6_open_reading_frame_183
ENSG00000231128	119.444067050869	1.05955866386509	-6.66336696128001	4.75359783127117e-15	9.9522918569921e-14	RP5-1073O3.2	chr1	+	113812379	113829171	1080	antisense	NA
ENSG00000136244	0.943449169558452	120.257316815662	6.81000720854954	4.75359783127117e-15	9.9522918569921e-14	IL6	chr7	+	22725884	22732002	2069	protein_coding	interleukin_6
ENSG00000166126	12.3196249236669	266.881260987727	4.4227615001482	4.82590563436941e-15	1.00958395140733e-13	AMN	chr14	+	102922656	102933596	4646	protein_coding	amnion_associated_transmembrane_protein
ENSG00000115155	6.63157350604578	190.932168002983	4.82062078275663	4.88402834138329e-15	1.02095122677319e-13	OTOF	chr2	-	26457203	26558698	7885	protein_coding	otoferlin
ENSG00000176809	361.184949717336	20.0467050958546	-4.16318932212228	5.24545460396624e-15	1.09531935234559e-13	LRRC37A3	chr17	-	64854312	64919480	7641	protein_coding	leucine-rich_repeat_containing_37_member_A3
ENSG00000184730	148.83217552288	3.16919693313913	-5.50098414332926	5.24791442271937e-15	1.09531935234559e-13	APOBR	chr16	+	28494649	28498970	3792	protein_coding	apolipoprotein_B_receptor
ENSG00000170836	5696.54827254357	476.796113816386	-3.5783125901728	5.30690815314162e-15	1.10677560137368e-13	PPM1D	chr17	+	60600183	60666280	5044	protein_coding	protein_phosphatase_Mg2+/Mn2+_dependent_1D
ENSG00000228203	1.38777878078145e-17	102.324891640612	9.68076331575811	5.39144573463156e-15	1.1209385171941e-13	RNF144A-AS1	chr2	-	6912277	6918709	4648	processed_transcript	RNF144A_antisense_RNA_1
ENSG00000229153	1.38777878078145e-17	102.324891640612	9.68076331575811	5.39144573463156e-15	1.1209385171941e-13	EPHA1-AS1	chr7	+	143407813	143523449	5316	antisense	EPHA1_antisense_RNA_1
ENSG00000128714	1.38777878078145e-17	102.324891640612	9.68076331575811	5.39144573463156e-15	1.1209385171941e-13	HOXD13	chr2	+	176092891	176095938	2240	protein_coding	homeobox_D13
ENSG00000137965	1.38777878078145e-17	102.324891640612	9.68076331575811	5.39144573463156e-15	1.1209385171941e-13	IFI44	chr1	+	78649796	78664078	2038	protein_coding	interferon_induced_protein_44
ENSG00000175895	3699.10503977241	305.910655837847	-3.59547747243726	5.43126422417592e-15	1.12834723473904e-13	PLEKHF2	chr8	+	95133804	95156684	3137	protein_coding	pleckstrin_homology_and_FYVE_domain_containing_2
ENSG00000141968	28.4357118817862	456.753992230353	3.99948040097174	5.60557113283754e-15	1.16366305749112e-13	VAV1	chr19	+	6772714	6857366	4305	protein_coding	vav_guanine_nucleotide_exchange_factor_1
ENSG00000117480	561.213675416188	36.924280507758	-3.92155017426699	5.64371179899219e-15	1.17067947978172e-13	FAAH	chr1	+	46394265	46413848	2776	protein_coding	fatty_acid_amide_hydrolase
ENSG00000187017	853.19873356582	61.1857978469708	-3.79899923031273	5.75728503365973e-15	1.19332012465541e-13	ESPN	chr1	+	6424788	6461370	4651	protein_coding	espin
ENSG00000134516	3.7875259485201	162.451257957419	5.37524184897773	5.76575318396955e-15	1.19415745283351e-13	DOCK2	chr5	+	169637247	170083382	12890	protein_coding	dedicator_of_cytokinesis_2
ENSG00000166145	2178.50753349182	175.109440216763	-3.63610664067925	5.81660834621255e-15	1.20376562290075e-13	SPINT1	chr15	+	40844018	40858207	3542	protein_coding	serine_peptidase_inhibitor_Kunitz_type_1
ENSG00000196975	1875.14643492734	149.793075665394	-3.64490227082675	5.88586081417003e-15	1.21716351775237e-13	ANXA4	chr2	+	69644425	69827100	11048	protein_coding	annexin_A4
ENSG00000188211	65.4078635502135	888.187029959308	3.76067594719763	5.89457990935449e-15	1.21803250448776e-13	NCR3LG1	chr11	+	17351726	17377341	6438	protein_coding	natural_killer_cell_cytotoxicity_receptor_3_ligand_1
ENSG00000086289	76.7839071843923	1016.8785472029	3.72494479120153	5.90583487797029e-15	1.21882672445393e-13	EPDR1	chr7	+	37683843	37951941	2864	protein_coding	ependymin_related_1
ENSG00000122863	32.2277288921922	502.112477918127	3.956208962662	5.90746320871204e-15	1.21882672445393e-13	CHST3	chr10	+	71964365	72013564	6970	protein_coding	carbohydrate_(chondroitin_6)_sulfotransferase_3
ENSG00000109107	250.268546398216	10.5530773088976	-4.5521423178848	5.93903615473967e-15	1.22440404395038e-13	ALDOC	chr17	-	28573115	28577264	2928	protein_coding	aldolase_fructose-bisphosphate_C
ENSG00000261578	225.62045655824	8.44338646668029	-4.72036077282811	6.04591989096091e-15	1.24548720992859e-13	RP11-21L23.2	chr11	+	76800364	76804555	4192	sense_overlapping	NA
ENSG00000145506	40.7597653317094	595.993994742787	3.8658051878702	6.10552412784042e-15	1.25680582924691e-13	NKD2	chr5	+	1008829	1038943	2885	protein_coding	naked_cuticle_homolog_2_(Drosophila)
ENSG00000108622	0.943449169558452	118.147619743605	6.78449882977993	6.523435630709e-15	1.34180751500915e-13	ICAM2	chr17	-	64002594	64020634	3243	protein_coding	intercellular_adhesion_molecule_2
ENSG00000044459	35.0717412763137	534.812781539662	3.92567200928473	6.70530398935243e-15	1.37816484281157e-13	CNTLN	chr9	+	17134982	17503923	11064	protein_coding	centlein
ENSG00000113356	47.3957925258271	674.052783967181	3.82636054136171	6.86491203548912e-15	1.40989503388423e-13	POLR3G	chr5	+	90471748	90514553	4019	protein_coding	polymerase_(RNA)_III_(DNA_directed)_polypeptide_G_(32kD)
ENSG00000274020	260.696584375501	11.6079237420807	-4.47503835043747	7.0772445911103e-15	1.45239709013608e-13	LINC01138	chr1	-	148362995	148460150	3938	lincRNA	long_intergenic_non-protein_coding_RNA_1138
ENSG00000006634	299.564725799424	3572.77646595009	3.57553254435529	7.136730812121e-15	1.46349112608103e-13	DBF4	chr7	+	87876216	87909541	4583	protein_coding	DBF4_zinc_finger
ENSG00000183196	7.57958445112432	199.370956141005	4.69366565876677	7.22063633589943e-15	1.47957203217222e-13	CHST6	chr16	-	75472052	75495384	8469	protein_coding	carbohydrate_(N-acetylglucosamine_6-O)_sulfotransferase_6
ENSG00000119900	364.028960045755	4311.17041676866	3.56548282553864	7.42435968485758e-15	1.519093444156e-13	OGFRL1	chr6	+	71288803	71308950	9051	protein_coding	opioid_growth_factor_receptor-like_1
ENSG00000166402	104.276010661215	1328.05885520784	3.66918421736661	7.42477623450866e-15	1.519093444156e-13	TUB	chr11	+	8019244	8106112	6722	protein_coding	tubby_bipartite_transcription_factor
ENSG00000006016	283.448667181958	13.7176178423347	-4.35705286558256	7.69542925370181e-15	1.57327479344445e-13	CRLF1	chr19	-	18572220	18607741	3018	protein_coding	cytokine_receptor-like_factor_1
ENSG00000227124	1.38777878078145e-17	100.215194550859	9.65074308816403	7.75341243742248e-15	1.58272914297907e-13	ZNF717	chr3	-	75709643	75785583	6871	protein_coding	zinc_finger_protein_717
ENSG00000258535	1.38777878078145e-17	100.215194550859	9.65074308816403	7.75341243742248e-15	1.58272914297907e-13	RP11-280K24.4	chr14	+	51765276	51825422	5982	sense_overlapping	NA
ENSG00000183580	2.83950028546094	146.62853008653	5.62730893345359	7.77164604488582e-15	1.58525118945833e-13	FBXL7	chr5	+	15500196	15939795	4854	protein_coding	F-box_and_leucine-rich_repeat_protein_7
ENSG00000187715	7.57958445112432	198.316107624255	4.68601688779497	7.97753025088113e-15	1.6260172391932e-13	KBTBD12	chr3	+	127915232	127987671	5818	protein_coding	kelch_repeat_and_BTB_(POZ)_domain_containing_12
ENSG00000178826	5.68356074469745	172.999743175568	4.89638455081843	8.40728207198718e-15	1.71231698151968e-13	TMEM139	chr7	+	143279957	143288048	2564	protein_coding	transmembrane_protein_139
ENSG00000277758	317.576791282901	16.8821608614159	-4.22388206461302	8.62176004297152e-15	1.75467457599072e-13	ABC7-42404400C24.1	chr10	-	47750864	47763592	5526	protein_coding	Synaptotagmin-15_
ENSG00000183128	9.47560276457628	222.57762347749	4.53517982208151	8.63460750757403e-15	1.75596399735476e-13	CALHM3	chr10	-	103472804	103479240	1652	protein_coding	calcium_homeostasis_modulator_3
ENSG00000196159	26.539703107702	424.053688577805	3.99142471336349	8.76352472374457e-15	1.78083803843629e-13	FAT4	chr4	+	125316399	125492932	16439	protein_coding	FAT_atypical_cadherin_4
ENSG00000188338	0.943449169558452	116.037922669736	6.75853130545668	8.98857231755077e-15	1.8251945867099e-13	SLC38A3	chr3	+	50205246	50221486	3968	protein_coding	solute_carrier_family_38_member_3
ENSG00000081277	960.323121649589	72.7891321250388	-3.71953785189817	9.0980441002095e-15	1.84603353804552e-13	PKP1	chr1	+	201283452	201332993	6211	protein_coding	plakophilin_1
ENSG00000260618	98.5879894119811	1.38777878078145e-17	-9.62728503272074	9.3166004288384e-15	1.88753904706278e-13	RP11-23N2.4	chr15	+	52577842	52598709	1211	antisense	NA
ENSG00000280435	1.38777878078145e-17	99.1603460050651	9.635495424796	9.3166004288384e-15	1.88753904706278e-13	RP4-555D20.1	chr3	-	44115818	44117487	1670	TEC	NA
ENSG00000112218	13.2676314239607	270.04580651905	4.33387844375281	9.611663678285e-15	1.94585677739214e-13	GPR63	chr6	-	96794126	96837463	5952	protein_coding	G_protein-coupled_receptor_63
ENSG00000196218	32.2277288921922	490.509144372394	3.92248658736698	9.73032274787911e-15	1.96840122445092e-13	RYR1	chr19	+	38433699	38587564	15965	protein_coding	ryanodine_receptor_1_(skeletal)
ENSG00000128602	8.5275940924434	208.864592785747	4.59341173387022	1.01167902589953e-14	2.04504772206947e-13	SMO	chr7	+	129188872	129213545	4311	protein_coding	smoothened_frizzled_class_receptor
ENSG00000173727	98.5879894119811	1236.28703556791	3.64670905874752	1.07441703791579e-14	2.1702419359129e-13	CMB9-22P13.1	chr11	+	65455258	65466720	1480	lincRNA	NA
ENSG00000270069	1.38777878078145e-17	98.1054974586439	9.62008488785906	1.12102184021795e-14	2.2626852502483e-13	MIR222HG	chrX	-	45745211	45770274	2785	lincRNA	MIR222_host_gene
ENSG00000134317	1221.02406596178	97.0506489115844	-3.65157635086806	1.12513383714041e-14	2.26928639134841e-13	GRHL1	chr2	+	9951693	10002277	7952	protein_coding	grainyhead-like_transcription_factor_1
ENSG00000135362	6.63157350604578	182.493379855118	4.75544670966274	1.13939874113351e-14	2.29633979472393e-13	PRR5L	chr11	+	36296288	36465204	6616	protein_coding	proline_rich_5_like
ENSG00000124143	1.89146593041347	129.750953619133	6.00599043198317	1.18726746025568e-14	2.39102720935434e-13	ARHGAP40	chr20	+	38601934	38651035	3195	protein_coding	Rho_GTPase_activating_protein_40
ENSG00000162616	60.6678451422579	802.744301279272	3.72308354907719	1.19588071093317e-14	2.40657606350924e-13	DNAJB4	chr1	+	77979175	78017964	3783	protein_coding	DnaJ_heat_shock_protein_family_(Hsp40)_member_B4
ENSG00000206503	346.016894624318	4012.6482909394	3.53514504135773	1.19976482239615e-14	2.41259196127775e-13	HLA-A	chr6	+	29941260	29945884	2710	protein_coding	major_histocompatibility_complex_class_I_A
ENSG00000180592	113.756045945966	1.05955866386509	-6.59305293258203	1.24368675918762e-14	2.49905045814109e-13	SKIDA1	chr10	-	21513478	21526368	6700	protein_coding	SKI/DACH_domain_containing_1
ENSG00000136826	2328.29207589741	196.206410590334	-3.5680242136022	1.33421765853977e-14	2.67896600001365e-13	KLF4	chr9	-	107484852	107490482	3659	protein_coding	Kruppel-like_factor_4_(gut)
ENSG00000128709	1.38777878078145e-17	97.0506489115844	9.6045079601604	1.35073943042655e-14	2.70208008018415e-13	HOXD9	chr2	+	176122720	176124937	1870	protein_coding	homeobox_D9
ENSG00000165863	96.691982313786	1.38777878078145e-17	-9.59930642477769	1.35073943042655e-14	2.70208008018415e-13	C10orf82	chr10	-	116663696	116670264	2411	protein_coding	chromosome_10_open_reading_frame_82
ENSG00000153233	1.38777878078145e-17	97.0506489115844	9.6045079601604	1.35073943042655e-14	2.70208008018415e-13	PTPRR	chr12	-	70638073	70920843	5142	protein_coding	protein_tyrosine_phosphatase_receptor_type_R
ENSG00000257732	1.38777878078145e-17	97.0506489115844	9.6045079601604	1.35073943042655e-14	2.70208008018415e-13	RP11-818F20.5	chr12	-	104262314	104280722	701	antisense	NA
ENSG00000207425	96.691982313786	1.38777878078145e-17	-9.59930642477769	1.35073943042655e-14	2.70208008018415e-13	Y_RNA	chr16	-	14915457	14915556	100	misc_RNA	Y_RNA
ENSG00000056972	1718.72586846481	142.409135977352	-3.59211674718098	1.4539123474022e-14	2.90631581616366e-13	TRAF3IP2	chr6	-	111556454	111606278	6553	protein_coding	TRAF3_interacting_protein_2
ENSG00000182983	0.943449169558452	113.92822559399	6.73208780308518	1.46525468100129e-14	2.92465268156039e-13	ZNF662	chr3	+	42905731	42917641	5070	protein_coding	zinc_finger_protein_662
ENSG00000180447	0.943449169558452	113.92822559399	6.73208780308518	1.46525468100129e-14	2.92465268156039e-13	GAS1	chr9	-	86944363	86947189	2827	protein_coding	growth_arrest_specific_1
ENSG00000149403	5.68356074469745	167.725500569118	4.85174821193151	1.49382852408461e-14	2.97948076778591e-13	GRIK4	chr11	+	120511759	120988904	7459	protein_coding	glutamate_receptor_ionotropic_kainate_4
ENSG00000172890	3037.39864368257	262.661866945043	-3.53095871721	1.61280140603349e-14	3.21439783555796e-13	NADSYN1	chr11	+	71453109	71524107	16263	protein_coding	NAD_synthetase_1
ENSG00000197724	2093.1872245238	177.219137257201	-3.56120562689817	1.67501675120247e-14	3.33593070257946e-13	PHF2	chr9	+	93576407	93679587	5569	protein_coding	PHD_finger_protein_2
ENSG00000154319	36.9677493890957	530.593387524546	3.83856085714174	1.89087899038277e-14	3.76305851325917e-13	FAM167A	chr8	-	11421463	11474715	5033	protein_coding	family_with_sequence_similarity_167_member_A
ENSG00000049192	16.1116492227514	294.307322241385	4.1802109480473	1.9552640948216e-14	3.88832238797634e-13	ADAMTS6	chr5	-	65148736	65481920	8567	protein_coding	ADAM_metallopeptidase_with_thrombospondin_type_1_motif_6
ENSG00000189056	1.38777878078145e-17	95.9958003638751	9.58876100933385	1.96936320538086e-14	3.91059265068485e-13	RELN	chr7	-	103471784	103989516	12642	protein_coding	reelin
ENSG00000160801	1.38777878078145e-17	95.9958003638751	9.58876100933385	1.96936320538086e-14	3.91059265068485e-13	PTH1R	chr3	+	46877746	46903799	2758	protein_coding	parathyroid_hormone_1_receptor
ENSG00000137309	4415.79563493439	48370.0826115097	3.45333107464331	2.01473192722643e-14	3.99773812726917e-13	HMGA1	chr6	+	34236873	34246231	2327	protein_coding	high_mobility_group_AT-hook_1
ENSG00000168676	0.943449169558452	111.818528516297	6.70515054722867	2.04047707131558e-14	4.04584593419823e-13	KCTD19	chr16	-	67289428	67326763	7383	protein_coding	potassium_channel_tetramerization_domain_containing_19
ENSG00000149582	81.52392518965	1011.60430469344	3.63116476249763	2.08893003081413e-14	4.13887488691651e-13	TMEM25	chr11	+	118531041	118547280	5529	protein_coding	transmembrane_protein_25
ENSG00000139112	92.8999680922543	1138.18612491087	3.6130620997845	2.26428932910835e-14	4.48302687582495e-13	GABARAPL1	chr12	+	10212458	10223130	4086	protein_coding	GABA(A)_receptor-associated_protein_like_1
ENSG00000054793	5183.67841544481	464.137931762656	-3.48101298980008	2.2910811742297e-14	4.53274357624931e-13	ATP9A	chr20	-	51596514	51768634	8317	protein_coding	ATPase_class_II_type_9A
ENSG00000203930	1.38777878078145e-17	94.9409518155041	9.57284028275573	2.38309497121716e-14	4.70787831456717e-13	LINC00632	chrX	+	140709767	140772679	3008	lincRNA	long_intergenic_non-protein_coding_RNA_632
ENSG00000180332	1.38777878078145e-17	94.9409518155041	9.57284028275573	2.38309497121716e-14	4.70787831456717e-13	KCTD4	chr13	-	45192853	45194717	1865	protein_coding	potassium_channel_tetramerization_domain_containing_4
ENSG00000140526	23665.0053355037	2174.04735332963	-3.44422807096969	2.38552597018359e-14	4.70923084275042e-13	ABHD2	chr15	+	89087459	89202360	10345	protein_coding	abhydrolase_domain_containing_2
ENSG00000146281	571.641713222492	6323.82135695495	3.46731496041539	2.39579910491231e-14	4.72605110922205e-13	PM20D2	chr6	+	89146050	89165565	4708	protein_coding	peptidase_M20_domain_containing_2
ENSG00000112379	5585.63187091633	503.167326422213	-3.47229902291142	2.48779490168917e-14	4.90393840050804e-13	ARFGEF3	chr6	+	138161921	138344663	14877	protein_coding	ARFGEF_family_member_3
ENSG00000125637	2528.32080024104	221.522774963406	-3.51194348452594	2.53877492867413e-14	5.00077463306257e-13	PSD4	chr2	+	113157325	113209396	13442	protein_coding	pleckstrin_and_Sec7_domain_containing_4
ENSG00000270504	3.7875259485201	150.847924191131	5.26841185007229	2.55141671121755e-14	5.02200752078047e-13	RP11-420L9.5	chr6	+	3751111	3753871	2761	antisense	NA
ENSG00000143409	2146.27541677083	186.712773930349	-3.52210079200146	2.61649206938004e-14	5.14634027300526e-13	FAM63A	chr1	-	150996086	151008375	3792	protein_coding	family_with_sequence_similarity_63_member_A
ENSG00000088002	388.677049540724	24.2660983632241	-3.99490632568868	2.73968829600204e-14	5.38472555320634e-13	SULT2B1	chr19	+	48552075	48599425	2822	protein_coding	sulfotransferase_family_2B_member_1
ENSG00000198673	9.47560276457628	209.919441301194	4.45075401468161	2.85035623349222e-14	5.59815777074663e-13	FAM19A2	chr12	-	61708259	62279150	9255	protein_coding	family_with_sequence_similarity_19_(chemokine_(C-C_motif)-like)_member_A2
ENSG00000154134	30.3317204673078	444.095810173216	3.86622950845329	2.86043633942526e-14	5.61386654504669e-13	ROBO3	chr11	+	124865386	124881470	7026	protein_coding	roundabout_guidance_receptor_3
ENSG00000259881	92.8999680922543	1.38777878078145e-17	-9.54166684021897	2.88798797359368e-14	5.64329591999472e-13	RP11-830F9.5	chr16	+	88881038	88887136	3057	antisense	NA
ENSG00000148680	1.38777878078145e-17	93.8861032664596	9.55674190217707	2.88798797359368e-14	5.64329591999472e-13	HTR7	chr10	-	90740823	90857698	3131	protein_coding	5-hydroxytryptamine_(serotonin)_receptor_7_adenylate_cyclase-coupled
ENSG00000230707	1.38777878078145e-17	93.8861032664596	9.55674190217707	2.88798797359368e-14	5.64329591999472e-13	RP11-364B14.3	chrX	+	140091743	140092561	819	processed_pseudogene	NA
ENSG00000049249	1.38777878078145e-17	93.8861032664596	9.55674190217707	2.88798797359368e-14	5.64329591999472e-13	TNFRSF9	chr1	-	7915894	7943165	6331	protein_coding	tumor_necrosis_factor_receptor_superfamily_member_9
ENSG00000261514	1.38777878078145e-17	93.8861032664596	9.55674190217707	2.88798797359368e-14	5.64329591999472e-13	RP11-527L4.2	chr17	+	43938363	43938959	434	lincRNA	NA
ENSG00000272121	1.38777878078145e-17	93.8861032664596	9.55674190217707	2.88798797359368e-14	5.64329591999472e-13	RP4-555D20.4	chr3	-	43998081	43999149	1069	lincRNA	NA
ENSG00000128016	724.270266417519	55.9115549566817	-3.69246788703306	2.9084260668803e-14	5.67911783631383e-13	ZFP36	chr19	+	39406813	39409412	2010	protein_coding	ZFP36_ring_finger_protein
ENSG00000120549	1488.36103419249	126.586408021581	-3.55428567437011	2.97056898962431e-14	5.79626363055059e-13	KIAA1217	chr10	+	23694746	24547848	10442	protein_coding	KIAA1217
ENSG00000151690	989.711228107869	80.1730720619615	-3.62384427590477	3.22484331132519e-14	6.28786151360773e-13	MFSD6	chr2	+	190408355	190509205	6031	protein_coding	major_facilitator_superfamily_domain_containing_6
ENSG00000223652	107.120021262558	1.05955866386509	-6.50643924909518	3.38135421164197e-14	6.58826572768334e-13	AC106786.1	chr5	-	123087248	123090299	1020	antisense	NA
ENSG00000105219	121.340074076251	2.11437967028788	-5.7644831476225	3.39048210858797e-14	6.6012809054284e-13	CNTD2	chr19	-	40222208	40226690	2039	protein_coding	cyclin_N-terminal_domain_containing_2
ENSG00000278041	1.38777878078145e-17	92.8312547167295	9.54046185805288	3.50507942094278e-14	6.80965213725813e-13	RP5-984P4.6	chr20	-	21499261	21502934	3674	lincRNA	NA
ENSG00000223572	91.9519645312981	1.38777878078145e-17	-9.52688979421637	3.50507942094278e-14	6.80965213725813e-13	CKMT1A	chr15	+	43692886	43699222	3109	protein_coding	creatine_kinase_mitochondrial_1A
ENSG00000254024	91.9519645312981	1.38777878078145e-17	-9.52688979421637	3.50507942094278e-14	6.80965213725813e-13	KB-1562D12.1	chr8	-	101461177	101492499	491	antisense	NA
ENSG00000186187	2858.22599487757	256.332775878949	-3.4784187959572	3.61239481430572e-14	7.01095800110704e-13	ZNRF1	chr16	+	74999030	75110994	8824	protein_coding	zinc_and_ring_finger_1_E3_ubiquitin_protein_ligase
ENSG00000030419	577.329733843415	42.198523384799	-3.77034896905271	3.6138958768593e-14	7.01095800110704e-13	IKZF2	chr2	-	212999691	213152427	12240	protein_coding	IKAROS_family_zinc_finger_2
ENSG00000162889	3737.97318051597	339.665808088848	-3.45960759010891	3.67731790960483e-14	7.12886806257397e-13	MAPKAPK2	chr1	+	206684944	206734283	4195	protein_coding	mitogen-activated_protein_kinase-activated_protein_kinase_2
ENSG00000125355	1.89146593041347	121.31216535103	5.90906243387082	3.95317649580801e-14	7.65814349037061e-13	TMEM255A	chrX	-	120258650	120311556	3858	protein_coding	transmembrane_protein_255A
ENSG00000146250	8.5275940924434	194.096713555838	4.48768263171211	3.98089171600959e-14	7.70629763201111e-13	PRSS35	chr6	+	83512538	83525704	2440	protein_coding	protease_serine_35
ENSG00000143061	9890.51545877223	927.216424536232	-3.41489946746258	3.98674822381634e-14	7.71209846509551e-13	IGSF3	chr1	-	116574399	116667755	7400	protein_coding	immunoglobulin_superfamily_member_3
ENSG00000237975	0.943449169558452	107.599134354785	6.6497185210048	4.01055842749875e-14	7.75259631225314e-13	FLG-AS1	chr1	+	152168125	152445456	7691	antisense	FLG_antisense_RNA_1
ENSG00000168502	140.3001441123	1604.42916260019	3.51425200697704	4.08230690188823e-14	7.88563667022336e-13	MTCL1	chr18	+	8705661	8832778	12665	protein_coding	microtubule_crosslinking_factor_1
ENSG00000226471	181.06429377574	6.33370047263656	-4.81121308052904	4.15770271576755e-14	8.02552694584021e-13	CTA-292E10.6	chr22	+	28800683	28848559	1470	antisense	NA
ENSG00000128578	25.5916986392898	381.859748353574	3.89248317078438	4.17072291732678e-14	8.04490087186223e-13	STRIP2	chr7	+	129434433	129488399	5876	protein_coding	striatin_interacting_protein_2
ENSG00000062038	3218.46729934973	292.197625223206	-3.4608218467585	4.19126344573154e-14	8.07874267888469e-13	CDH3	chr16	+	68636189	68722616	6236	protein_coding	cadherin_3_type_1_P-cadherin_(placental)
ENSG00000135298	1.38777878078145e-17	91.7764061663017	9.52399600354787	4.26048446855974e-14	8.18292195008418e-13	ADGRB3	chr6	+	68635367	69389511	6490	protein_coding	adhesion_G_protein-coupled_receptor_B3
ENSG00000229373	1.38777878078145e-17	91.7764061663017	9.52399600354787	4.26048446855974e-14	8.18292195008418e-13	LINC00452	chr13	+	113888306	113923512	3578	lincRNA	long_intergenic_non-protein_coding_RNA_452
ENSG00000168928	90.0559574022609	1.38777878078145e-17	-9.49687373171316	4.26048446855974e-14	8.18292195008418e-13	CTRB2	chr16	-	75204096	75207185	2346	protein_coding	chymotrypsinogen_B2
ENSG00000175084	1.38777878078145e-17	91.7764061663017	9.52399600354787	4.26048446855974e-14	8.18292195008418e-13	DES	chr2	+	219418377	219426739	2464	protein_coding	desmin
ENSG00000182901	1.38777878078145e-17	91.7764061663017	9.52399600354787	4.26048446855974e-14	8.18292195008418e-13	RGS7	chr1	-	240775514	241357230	2578	protein_coding	regulator_of_G-protein_signaling_7
ENSG00000106003	1250.41217240302	106.544285813075	-3.55140047828027	4.32057026275481e-14	8.29241976551218e-13	LFNG	chr7	+	2512529	2529177	3418	protein_coding	LFNG_O-fucosylpeptide_3-beta-N-acetylglucosaminyltransferase
ENSG00000204956	132.716116141048	3.16919693313913	-5.33579319948757	4.59056123706029e-14	8.80434383489102e-13	PCDHGA1	chr5	+	141330571	141512981	6252	protein_coding	protocadherin_gamma_subfamily_A_1
ENSG00000231672	119.444067050869	2.11437967028788	-5.74178660292637	4.61361280686362e-14	8.84226602344593e-13	DIRC3	chr2	-	217284019	217756593	4665	protein_coding	disrupted_in_renal_carcinoma_3
ENSG00000122644	48.3437963521191	623.420055825471	3.68522958194142	4.79329895939202e-14	9.18012072009697e-13	ARL4A	chr7	+	12686856	12690934	3561	protein_coding	ADP_ribosylation_factor_like_GTPase_4A
ENSG00000150347	1222.920072829	104.434588727989	-3.54815097289457	4.84931176934829e-14	9.28080490931483e-13	ARID5B	chr10	+	61901300	62096944	8164	protein_coding	AT-rich_interaction_domain_5B
ENSG00000255150	4.73554534719345	145.573681559676	4.90440470380607	4.87070220508326e-14	9.30348537797514e-13	EID3	chr12	+	104303739	104305202	1464	protein_coding	EP300_interacting_inhibitor_of_differentiation_3
ENSG00000168916	3.7875259485201	145.573681559676	5.21710818808164	4.87070220508326e-14	9.30348537797514e-13	ZNF608	chr5	-	124636913	124748807	6922	protein_coding	zinc_finger_protein_608
ENSG00000203780	191.492331930141	7.38854262067175	-4.67354077548622	4.87151277671916e-14	9.30348537797514e-13	FANK1	chr10	+	125896539	126009592	3384	protein_coding	fibronectin_type_III_and_ankyrin_repeat_domains_1
ENSG00000136943	21.7996800907342	335.446414059617	3.93569390855571	4.89576333508385e-14	9.3431814645344e-13	CTSV	chr9	-	97029679	97039643	4700	protein_coding	cathepsin_V
ENSG00000188938	2852.53797428052	260.552169923293	-3.45200166977823	5.12879654064853e-14	9.78098497278136e-13	FAM120AOS	chr9	-	93446494	93453592	3717	protein_coding	family_with_sequence_similarity_120A_opposite_strand
ENSG00000165379	1.38777878078145e-17	90.7215576151637	9.50734004819607	5.18667674433361e-14	9.87042520026112e-13	LRFN5	chr14	+	41607570	41904549	6140	protein_coding	leucine_rich_repeat_and_fibronectin_type_III_domain_containing_5
ENSG00000136866	1.38777878078145e-17	90.7215576151637	9.50734004819607	5.18667674433361e-14	9.87042520026112e-13	ZFP37	chr9	-	113038380	113056759	6354	protein_coding	ZFP37_zinc_finger_protein
ENSG00000177181	89.1079538340458	1.38777878078145e-17	-9.48162821726651	5.18667674433361e-14	9.87042520026112e-13	RIMKLA	chr1	+	42380795	42422578	8981	protein_coding	ribosomal_modification_protein_rimK-like_family_member_A
ENSG00000167994	53.0838153076414	674.052783967181	3.66326784828781	5.22891645929379e-14	9.94379134282907e-13	RAB3IL1	chr11	-	61897301	61920269	3006	protein_coding	RAB3A_interacting_protein_(rabin3)-like_1
ENSG00000253878	118.496063536446	2.11437967028788	-5.73030301222359	5.38953524881424e-14	1.02420160337931e-12	RP11-347C18.3	chr8	+	94950037	94951396	709	sense_intronic	NA
ENSG00000103089	375.405001354989	24.2660983632241	-3.94479922056779	5.44292058071516e-14	1.03361828436313e-12	FA2H	chr16	-	74712955	74774831	3279	protein_coding	fatty_acid_2-hydroxylase
ENSG00000018236	0.943449169558452	105.489437270813	6.62118280346451	5.66194957713191e-14	1.07369994582939e-12	CNTN1	chr12	+	40692442	41072418	7492	protein_coding	contactin_1
ENSG00000069431	0.943449169558452	105.489437270813	6.62118280346451	5.66194957713191e-14	1.07369994582939e-12	ABCC9	chr12	-	21797401	21941402	11421	protein_coding	ATP_binding_cassette_subfamily_C_member_9
ENSG00000120820	14.215637608667	257.387624390142	4.1660092973088	5.67700302912031e-14	1.07579805820983e-12	GLT8D2	chr12	-	103988984	104064183	3271	protein_coding	glycosyltransferase_8_domain_containing_2
ENSG00000166173	67.3038708714388	815.402483307085	3.59619696453787	5.94928143920658e-14	1.12660339388795e-12	LARP6	chr15	-	70829130	70854159	5554	protein_coding	La_ribonucleoprotein_domain_family_member_6
ENSG00000138798	9.47560276457628	201.480653174092	4.39159413218844	6.11900394623605e-14	1.15793024852071e-12	EGF	chr4	+	109912884	110012266	6127	protein_coding	epidermal_growth_factor
ENSG00000111817	216.140421970674	2360.75553805554	3.44841930411762	6.21794671176311e-14	1.1758285485933e-12	DSE	chr6	+	116254173	116444860	15016	protein_coding	dermatan_sulfate_epimerase
ENSG00000175745	154.520196434071	4.22402546552972	-5.15376141194941	6.27673469989982e-14	1.18528310866596e-12	NR2F1	chr5	+	93583337	93594615	4201	protein_coding	nuclear_receptor_subfamily_2_group_F_member_1
ENSG00000267475	154.520196434071	4.22402546552972	-5.15376141194941	6.27673469989982e-14	1.18528310866596e-12	CTD-2538C1.2	chr19	-	32687089	32691750	568	lincRNA	NA
ENSG00000277559	88.1599502632724	1.38777878078145e-17	-9.4662198754023	6.32410585493307e-14	1.19172493699598e-12	RP11-434E6.4	chr16	+	54290965	54292422	1458	lincRNA	NA
ENSG00000229563	1.38777878078145e-17	89.6667090633033	9.49048955119017	6.32410585493307e-14	1.19172493699598e-12	LINC01204	chrX	+	45505388	45630202	5260	lincRNA	long_intergenic_non-protein_coding_RNA_1204
ENSG00000184838	1.38777878078145e-17	89.6667090633033	9.49048955119017	6.32410585493307e-14	1.19172493699598e-12	PRR16	chr5	+	120464278	120687332	2274	protein_coding	proline_rich_16
ENSG00000140931	43.603777082189	562.238842634234	3.68469804266087	6.40445812088084e-14	1.20602386653403e-12	CMTM3	chr16	+	66603874	66613892	3163	protein_coding	CKLF-like_MARVEL_transmembrane_domain_containing_3
ENSG00000240891	16.1116492227514	277.42974608994	4.09504583432947	6.42470919547583e-14	1.20899307861271e-12	PLCXD2	chr3	+	111674676	111846447	2927	protein_coding	phosphatidylinositol-specific_phospholipase_C_X_domain_containing_2
ENSG00000273802	498.645448538246	36.924280507758	-3.75105605013183	6.46188659773893e-14	1.21514110177565e-12	HIST1H2BG	chr6	-	26215159	26216692	1534	protein_coding	histone_cluster_1_H2bg
ENSG00000206559	15.1636435283222	266.881260987727	4.12591606756219	6.5294906416895e-14	1.22699822051428e-12	ZCWPW2	chr3	+	28349146	28538122	2895	protein_coding	zinc_finger_CW_type_with_PWWP_domain_2
ENSG00000126460	329.900836071522	21.1015533357814	-3.95897885316201	6.61616468865824e-14	1.24241989550389e-12	PRRG2	chr19	+	49580646	49591015	1701	protein_coding	proline_rich_Gla_(G-carboxyglutamic_acid)_2
ENSG00000259723	103.328007124128	1.05955866386509	-6.45450622778607	6.7394914282257e-14	1.26469816182e-12	RP5-823G15.5	chr20	-	53453058	53504314	542	antisense	NA
ENSG00000129422	455.037290360422	32.7048862771805	-3.79352184997302	6.77259701797209e-14	1.27002678154823e-12	MTUS1	chr8	-	17643795	17800917	12010	protein_coding	microtubule_associated_tumor_suppressor_1
ENSG00000185924	1316.77241274955	116.037922669736	-3.50298516412169	6.78094525463443e-14	1.27070861526388e-12	RTN4RL1	chr17	-	1934677	2025345	3625	protein_coding	reticulon_4_receptor-like_1
ENSG00000127528	24.6436941098209	361.817626733668	3.86890669231441	6.91582012570004e-14	1.29508337159463e-12	KLF2	chr19	+	16324817	16327874	2018	protein_coding	Kruppel-like_factor_2
ENSG00000175155	1717.77786503167	155.067318291437	-3.46856723075747	6.95115479394327e-14	1.30079694776873e-12	YPEL2	chr17	+	59331689	59401729	8667	protein_coding	yippee_like_2
ENSG00000180773	109.016028322243	1241.56127807612	3.50797435729095	7.19907522585561e-14	1.34625702177824e-12	SLC36A4	chr11	-	93144171	93197964	9685	protein_coding	solute_carrier_family_36_(proton/amino_acid_symporter)_member_4
ENSG00000173535	187.700318060551	7.38854262067175	-4.64470489793536	7.33089145834298e-14	1.36995716608231e-12	TNFRSF10C	chr8	+	23084355	23117437	2625	protein_coding	tumor_necrosis_factor_receptor_superfamily_member_10c
ENSG00000180739	18.9556652446005	308.020352854774	4.01308588183033	7.39016300891923e-14	1.38007711702573e-12	S1PR5	chr19	-	10512742	10517931	2806	protein_coding	sphingosine-1-phosphate_receptor_5
ENSG00000071575	27.4877075203187	391.353384907129	3.825290660568	7.50822616812831e-14	1.40115451107092e-12	TRIB2	chr2	+	12716889	12742734	4588	protein_coding	tribbles_pseudokinase_2
ENSG00000165804	1812.57820834382	164.560955002754	-3.46039839003882	7.62787677736664e-14	1.42249879099909e-12	ZNF219	chr14	-	21090046	21104722	6679	protein_coding	zinc_finger_protein_219
ENSG00000166840	1.38777878078145e-17	88.6118605107078	9.47343991427437	7.72324431841381e-14	1.43928822591808e-12	GLYATL1	chr11	+	58905398	59043527	5440	protein_coding	glycine-N-acyltransferase_like_1
ENSG00000172927	297.668718904659	3162.44039898759	3.40868765260439	7.95212361935396e-14	1.48091827016229e-12	MYEOV	chr11	+	69294138	69367726	3760	protein_coding	myeloma_overexpressed
ENSG00000107317	0.943449169558452	103.379740184592	6.59207125631842	8.0319002555793e-14	1.49371187787553e-12	PTGDS	chr9	+	136977505	136985435	2378	protein_coding	prostaglandin_D2_synthase
ENSG00000176771	102.380003585319	1.05955866386509	-6.44122552197266	8.0319002555793e-14	1.49371187787553e-12	NCKAP5	chr2	-	132671799	133568463	9552	protein_coding	NCK-associated_protein_5
ENSG00000132382	562.161678853195	5872.34619846801	3.38457806546236	8.08069087019486e-14	1.50106539960599e-12	MYBBP1A	chr17	-	4538897	4555631	6203	protein_coding	MYB_binding_protein_(P160)_1a
ENSG00000224189	28.4357118817862	400.847021458787	3.81116776803272	8.08257420539902e-14	1.50106539960599e-12	HAGLR	chr2	-	176173195	176188958	4851	antisense	HOXD_antisense_growth-associated_long_non-coding_RNA
ENSG00000132563	18.007660057365	295.362170750398	4.02607343470638	8.10699583199916e-14	1.50456469102333e-12	REEP2	chr5	+	138439017	138446969	3284	protein_coding	receptor_accessory_protein_2
ENSG00000184304	29.3837161962256	410.340658008668	3.79782577591251	8.25157031426557e-14	1.53034281357968e-12	PRKD1	chr14	-	29576479	30191898	5187	protein_coding	protein_kinase_D1
ENSG00000136944	974.543173161999	83.3376177362614	-3.54579759667466	8.52322760233697e-14	1.57963818229978e-12	LMX1B	chr9	+	126614443	126701032	5830	protein_coding	LIM_homeobox_transcription_factor_1_beta
ENSG00000203814	185.804311123774	7.38854262067175	-4.63006790502267	9.01548225531367e-14	1.66972180286256e-12	HIST2H2BF	chr1	-	149782689	149812373	3196	protein_coding	histone_cluster_2_H2bf
ENSG00000133477	127.028095126378	3.16919693313913	-5.27266006854569	9.41162426945361e-14	1.74069862860141e-12	FAM83F	chr22	+	39994949	40043529	16389	protein_coding	family_with_sequence_similarity_83_member_F
ENSG00000121207	2.83950028546094	128.696105086998	5.43927618195225	9.41162426945361e-14	1.74069862860141e-12	LRAT	chr4	+	154626945	154753118	7562	protein_coding	lecithin_retinol_acyltransferase_(phosphatidylcholine--retinol_O-acyltransferase)
ENSG00000105141	86.263943113753	1.38777878078145e-17	-9.43490053155406	9.44718278234553e-14	1.74488171855294e-12	CASP14	chr19	+	15049384	15058293	3497	protein_coding	caspase_14
ENSG00000247765	1.38777878078145e-17	87.5570119573647	9.45618637421211	9.44718278234553e-14	1.74488171855294e-12	RP11-32B5.7	chr15	-	21298233	21325241	2165	lincRNA	NA
ENSG00000169594	38.8637574037154	510.551265950491	3.7111098540873	9.55054990934038e-14	1.76276611126128e-12	BNC1	chr15	-	83255903	83284716	4797	protein_coding	basonuclin_1
ENSG00000077522	0.943449169558452	102.324891640612	6.57729219144056	9.58400419406214e-14	1.76672443704538e-12	ACTN2	chr1	+	236686454	236764631	5530	protein_coding	actinin_alpha_2
ENSG00000143554	785.890489699215	65.4051921431048	-3.58443861104584	9.58509920417339e-14	1.76672443704538e-12	SLC27A3	chr1	+	153774354	153780157	5470	protein_coding	solute_carrier_family_27_(fatty_acid_transporter)_member_3
ENSG00000074181	6330.76256902396	612.871570794209	-3.36846904358216	9.91593268445961e-14	1.82645519651050e-12	NOTCH3	chr19	-	15159038	15200981	9394	protein_coding	notch_3
ENSG00000255346	150.728182495707	4.22402546552972	-5.11794550682034	1.03199684428919e-13	1.89698888228373e-12	NOX5	chr15	+	68930525	69062743	12511	protein_coding	NADPH_oxidase_EF-hand_calcium_binding_domain_5
ENSG00000120162	5.68356074469745	151.902772716599	4.70890201318722	1.03199684428919e-13	1.89698888228373e-12	MOB3B	chr9	-	27325209	27529781	7087	protein_coding	MOB_kinase_activator_3B
ENSG00000197180	150.728182495707	4.22402546552972	-5.11794550682034	1.03199684428919e-13	1.89698888228373e-12	CH17-340M24.3	chrX	-	154424380	154428479	598	lincRNA	uncharacterized_protein_BC009467
ENSG00000254973	227.516463473292	11.6079237420807	-4.27874182079921	1.03589830434325e-13	1.90286332935423e-12	RP11-429J17.7	chr8	-	143758153	143771822	1809	lincRNA	NA
ENSG00000151632	404.793108041034	28.4854921836256	-3.82326890992334	1.05574816567786e-13	1.93800578867728e-12	AKR1C2	chr10	-	4922564	5135226	6703	protein_coding	aldo-keto_reductase_family_1_member_C2
ENSG00000226887	48.3437963521191	599.158540252565	3.62797407569499	1.06589214793626e-13	1.95529575926866e-12	ERVMER34-1	chr4	-	52722618	52751640	4077	protein_coding	endogenous_retrovirus_group_MER34_member_1
ENSG00000106689	15.1636435283222	259.497321412313	4.08545618984579	1.1054886146051e-13	2.02655377168193e-12	LHX2	chr9	+	124001670	124033301	2655	protein_coding	LIM_homeobox_2
ENSG00000138600	3995.83011422727	385.024293871644	-3.37507006387461	1.1237627713127e-13	2.05865400076211e-12	SPPL2A	chr15	-	50702266	50765808	8144	protein_coding	signal_peptide_peptidase_like_2A
ENSG00000110811	69.1998781712611	810.128240795549	3.54683202583467	1.13066856101333e-13	2.06989873837646e-12	P3H3	chr12	+	6828410	6839851	4601	protein_coding	prolyl_3-hydroxylase_3
ENSG00000176293	1.38777878078145e-17	86.5021634032612	9.43872399479802	1.15749266522429e-13	2.1146983204904e-12	ZNF135	chr19	+	58059239	58086310	6418	protein_coding	zinc_finger_protein_135
ENSG00000158321	85.3159395348508	1.38777878078145e-17	-9.41898214778756	1.15749266522429e-13	2.1146983204904e-12	AUTS2	chr7	+	69598919	70793068	10420	protein_coding	autism_susceptibility_candidate_2
ENSG00000205018	85.3159395348508	1.38777878078145e-17	-9.41898214778756	1.15749266522429e-13	2.1146983204904e-12	RP11-830F9.6	chr16	+	88939789	88951524	1812	antisense	NA
ENSG00000175315	5.68356074469745	150.847924191131	4.69885663212298	1.17040207629029e-13	2.13683563908219e-12	CST6	chr11	+	66011841	66013505	759	protein_coding	cystatin_E/M
ENSG00000160766	257.852574019719	14.7724653244214	-4.11459170476857	1.19292278492811e-13	2.17647874278562e-12	GBAP1	chr1	-	155213821	155227422	3656	transcribed_unprocessed_pseudogene	glucosidase_beta_acid_pseudogene_1
ENSG00000111275	37.9157534079081	493.673689885013	3.69813184976703	1.25540679815627e-13	2.28893169162151e-12	ALDH2	chr12	+	111766887	111817529	9720	protein_coding	aldehyde_dehydrogenase_2_family_(mitochondrial)
ENSG00000204525	341.276877404767	3529.52767740166	3.36996371510615	1.29002175523039e-13	2.35045450348261e-12	HLA-C	chr6	-	31268749	31272130	2507	protein_coding	major_histocompatibility_complex_class_I_C
ENSG00000196787	318.524794728611	21.1015533357814	-3.9083722673753	1.29988662702235e-13	2.36682935748039e-12	HIST1H2AG	chr6	+	27133042	27135291	2250	protein_coding	histone_cluster_1_H2ag
ENSG00000149131	18.007660057365	289.033079695549	3.99483584615777	1.3046110846825e-13	2.37382877932174e-12	SERPING1	chr11	+	57597387	57614853	3603	protein_coding	serpin_peptidase_inhibitor_clade_G_(C1_inhibitor)_member_1
ENSG00000113594	67.3038708714388	784.811876739107	3.54103977875288	1.31247302349212e-13	2.3865237728583e-12	LIFR	chr5	-	38474963	38608354	11864	protein_coding	leukemia_inhibitory_factor_receptor_alpha
ENSG00000173559	104.276010661215	1155.06370093852	3.46785711066716	1.33769772883362e-13	2.43075181642368e-12	NABP1	chr2	+	191678068	191696659	13806	protein_coding	nucleic_acid_binding_protein_1
ENSG00000124839	681.610111821453	56.9664035364001	-3.57799504811125	1.37179863960357e-13	2.49103852629965e-12	RAB17	chr2	-	237574322	237601614	4783	protein_coding	RAB17_member_RAS_oncogene_family
ENSG00000184330	112.808042424002	2.11437967028788	-5.65941302961281	1.39838422634734e-13	2.53589973420864e-12	S100A7A	chr1	+	153416524	153423225	4457	protein_coding	S100_calcium_binding_protein_A7A
ENSG00000250091	112.808042424002	2.11437967028788	-5.65941302961281	1.39838422634734e-13	2.53589973420864e-12	DNAH10OS	chr12	-	123926424	123934984	5040	protein_coding	dynein_axonemal_heavy_chain_10_opposite_strand
ENSG00000138964	1.38777878078145e-17	85.4473148483846	9.42104765838045	1.42055918004803e-13	2.57438164308972e-12	PARVG	chr22	+	44172956	44219533	8656	protein_coding	parvin_gamma
ENSG00000116717	286.292677528262	2957.79978975399	3.36836953997258	1.49770551131035e-13	2.71236580376057e-12	GADD45A	chr1	+	67685061	67688338	2069	protein_coding	growth_arrest_and_DNA_damage_inducible_alpha
ENSG00000152926	628.521919411869	51.6921606308709	-3.60089026444987	1.50018331402428e-13	2.71502974805227e-12	ZNF117	chr7	-	64971776	65006684	10691	protein_coding	zinc_finger_protein_117
ENSG00000170629	5.68356074469745	148.738227139384	4.67855356728858	1.50824447052652e-13	2.72778808800927e-12	DPY19L2P2	chr7	-	103175133	103280410	5580	transcribed_unprocessed_pseudogene	DPY19L2_pseudogene_2
ENSG00000176681	10.4236106947186	202.535501690433	4.26332507807952	1.58656923493098e-13	2.86752184913866e-12	LRRC37A	chr17	+	46292733	46337794	6506	protein_coding	leucine_rich_repeat_containing_37A
ENSG00000173706	130.820109139837	1402.95309881798	3.42151020457847	1.595680931329e-13	2.88205840550689e-12	HEG1	chr3	-	124965710	125055958	9925	protein_coding	heart_development_protein_with_EGF-like_domains_1
ENSG00000167693	85.3159395348508	955.697334090589	3.4836650906301	1.61024012110839e-13	2.90640797227636e-12	NXN	chr17	-	799313	979770	5880	protein_coding	nucleoredoxin
ENSG00000133816	96.691982313786	1061.18218428091	3.45436943522098	1.7116840187996e-13	3.08744289304013e-12	MICAL2	chr11	+	12094008	12263789	15809	protein_coding	microtubule_associated_monooxygenase_calponin_and_LIM_domain_containing_2
ENSG00000256417	168.740248625874	6.33370047263656	-4.70959026656893	1.72966920392829e-13	3.11779811184027e-12	RP11-1038A11.3	chr12	+	5290480	5383653	1604	lincRNA	NA
ENSG00000133019	1.38777878078145e-17	84.3924662927222	9.40315205685813	1.74637550574711e-13	3.14161186710985e-12	CHRM3	chr1	+	239386565	239915452	12170	protein_coding	cholinergic_receptor_muscarinic_3
ENSG00000226521	1.38777878078145e-17	84.3924662927222	9.40315205685813	1.74637550574711e-13	3.14161186710985e-12	AC126365.1	chr17	+	20716481	20737127	1500	transcribed_unprocessed_pseudogene	NA
ENSG00000162687	1.38777878078145e-17	84.3924662927222	9.40315205685813	1.74637550574711e-13	3.14161186710985e-12	KCNT2	chr1	-	196225779	196609225	7100	protein_coding	potassium_channel_sodium_activated_subfamily_T_member_2
ENSG00000066923	97.6399858638856	1066.45642679003	3.4474641605799	1.87890489771162e-13	3.37776996477943e-12	STAG3	chr7	+	100177563	100221488	8583	protein_coding	stromal_antigen_3
ENSG00000119771	40.7597653317094	503.167326422213	3.62159931696836	1.8850371396718e-13	3.38653640961958e-12	KLHL29	chr2	+	23385217	23708611	11071	protein_coding	kelch_like_family_member_29
ENSG00000112541	12.3196249236669	221.522774963406	4.15415153889424	1.90204128257716e-13	3.41253793918667e-12	PDE10A	chr6	-	165327287	165986603	12348	protein_coding	phosphodiesterase_10A
ENSG00000116833	220.880439267093	11.6079237420807	-4.23606113523233	1.90204128257716e-13	3.41253793918667e-12	NR5A2	chr1	+	200027602	200177424	7559	protein_coding	nuclear_receptor_subfamily_5_group_A_member_2
ENSG00000139679	110.912035375967	2.11437967028788	-5.63498724229501	1.93739272154257e-13	3.47365240220193e-12	LPAR6	chr13	-	48389567	48444704	4348	protein_coding	lysophosphatidic_acid_receptor_6
ENSG00000205336	3653.60087499935	360.76277822708	-3.33976692037135	1.95973327486734e-13	3.51137325515434e-12	ADGRG1	chr16	+	57610652	57665580	8659	protein_coding	adhesion_G_protein-coupled_receptor_G1
ENSG00000162444	0.943449169558452	98.1054974586439	6.51661376354151	1.96784779789609e-13	3.52357129602031e-12	RBP7	chr1	+	9997206	10016020	861	protein_coding	retinol_binding_protein_7
ENSG00000135439	331.796842961041	22.1564016332808	-3.89725815707088	2.02940493685775e-13	3.63138245038527e-12	AGAP2	chr12	-	57723761	57742157	6728	protein_coding	ArfGAP_with_GTPase_domain_ankyrin_repeat_and_PH_domain_2
ENSG00000168497	1.38777878078145e-17	83.3376177362614	9.38503168211148	2.15062909504043e-13	3.83557302757011e-12	SDPR	chr2	-	191834302	191847255	3229	protein_coding	serum_deprivation_response
ENSG00000116157	1.38777878078145e-17	83.3376177362614	9.38503168211148	2.15062909504043e-13	3.83557302757011e-12	GPX7	chr1	+	52602372	52609051	1691	protein_coding	glutathione_peroxidase_7
ENSG00000261888	82.4719287805685	1.38777878078145e-17	-9.37014521969735	2.15062909504043e-13	3.83557302757011e-12	AC144831.1	chr17	+	83104255	83106910	2656	lincRNA	NA
ENSG00000238243	1.38777878078145e-17	83.3376177362614	9.38503168211148	2.15062909504043e-13	3.83557302757011e-12	OR2W3	chr1	+	247895587	247896531	945	protein_coding	olfactory_receptor_family_2_subfamily_W_member_3
ENSG00000123685	1.38777878078145e-17	83.3376177362614	9.38503168211148	2.15062909504043e-13	3.83557302757011e-12	BATF3	chr1	-	212686418	212699985	2713	protein_coding	basic_leucine_zipper_transcription_factor_ATF-like_3
ENSG00000120690	4695.45664759133	469.41217428529	-3.32200852585808	2.20263205203655e-13	3.92572213583725e-12	ELF1	chr13	-	40931920	41061440	4443	protein_coding	E74-like_factor_1_(ets_domain_transcription_factor)
ENSG00000187957	6.63157350604578	156.122166815874	4.53043841343293	2.2154252516668e-13	3.94591527981816e-12	DNER	chr2	-	229357629	229714558	3935	protein_coding	delta/notch_like_EGF_repeat_containing
ENSG00000135114	5.68356074469745	145.573681559676	4.64755297013233	2.21705269392547e-13	3.94620745507552e-12	OASL	chr12	-	121019111	121039242	3517	protein_coding	2'-5'-oligoadenylate_synthetase-like
ENSG00000157423	1.89146593041347	110.763679976699	5.77795912851492	2.28406172442478e-13	4.0627973918759e-12	HYDIN	chr16	-	70807378	71230722	23408	protein_coding	HYDIN_axonemal_central_pair_apparatus_protein
ENSG00000223523	96.691982313786	1.05955866386509	-6.35886669463253	2.36333456806604e-13	4.20103361651079e-12	AC079613.1	chr2	-	188598791	188839445	797	sense_overlapping	NA
ENSG00000163710	11.3716180425464	208.864592785747	4.18358413722174	2.41560379486947e-13	4.29111804561596e-12	PCOLCE2	chr3	-	142815922	142889203	3480	protein_coding	procollagen_C-endopeptidase_enhancer_2
ENSG00000262185	7.57958445112432	166.670652047211	4.43538108328329	2.43176753731412e-13	4.31698771634053e-12	RP11-462G12.1	chr16	-	3947609	3950444	1394	sense_overlapping	NA
ENSG00000167105	3.7875259485201	133.970347744002	5.09737547065617	2.46856206244156e-13	4.37716593297556e-12	TMEM92	chr17	+	50271406	50281485	3101	protein_coding	transmembrane_protein_92
ENSG00000268357	9.47560276457628	187.767622448745	4.28996397104018	2.46891247647253e-13	4.37716593297556e-12	VN1R81P	chr19	+	21123817	21124188	372	unprocessed_pseudogene	vomeronasal_1_receptor_81_pseudogene
ENSG00000198142	443.66124908802	4402.94223636951	3.31055685426095	2.5400387544357e-13	4.50030782208365e-12	SOWAHC	chr2	+	109614334	109618990	4657	protein_coding	sosondowah_ankyrin_repeat_domain_family_member_C
ENSG00000157064	76.7839071843923	847.047938374799	3.46134713427964	2.56195779946569e-13	4.53616244388652e-12	NMNAT2	chr1	-	183248237	183418602	7165	protein_coding	nicotinamide_nucleotide_adenylyltransferase_2
ENSG00000103145	426.597187171636	4233.11162768275	3.31037634809	2.59453001826772e-13	4.59081997851753e-12	HCFC1R1	chr16	-	3022620	3024286	1433	protein_coding	host_cell_factor_C1_regulator_1_(XPO1_dependent)
ENSG00000156218	8.5275940924434	176.164288737075	4.34791935179176	2.60306973934198e-13	4.59989374777823e-12	ADAMTSL3	chr15	+	83654086	84039842	9754	protein_coding	ADAMTS_like_3
ENSG00000099139	8.5275940924434	176.164288737075	4.34791935179176	2.60306973934198e-13	4.59989374777823e-12	PCSK5	chr9	+	75890644	76362339	12705	protein_coding	proprotein_convertase_subtilisin/kexin_type_5
ENSG00000260409	1.38777878078145e-17	82.2827691789892	9.36668081582524	2.65311252846109e-13	4.6791257320132e-12	RP11-403B2.7	chr15	-	20729747	20756183	1602	lincRNA	NA
ENSG00000251026	81.52392518965	1.38777878078145e-17	-9.3534918285235	2.65311252846109e-13	4.6791257320132e-12	RP11-138J23.1	chr5	+	104079911	104105403	574	lincRNA	NA
ENSG00000048740	1.38777878078145e-17	82.2827691789892	9.36668081582524	2.65311252846109e-13	4.6791257320132e-12	CELF2	chr10	+	11005321	11336675	10427	protein_coding	CUGBP_Elav-like_family_member_2
ENSG00000186918	882.586840035854	79.1182235021812	-3.4776766378076	2.67277609613624e-13	4.71072419662809e-12	ZNF395	chr8	-	28345585	28402701	5819	protein_coding	zinc_finger_protein_395
ENSG00000129910	1.89146593041347	109.708831436587	5.76416894469014	2.69568496745256e-13	4.74799744169339e-12	CDH15	chr16	+	89171767	89195492	4628	protein_coding	cadherin_15_type_1_M-cadherin_(myotubule)
ENSG00000157514	3390.05592068603	339.665808088848	-3.31866556022838	2.75734545936329e-13	4.85343196195761e-12	TSC22D3	chrX	-	107713221	107777342	4766	protein_coding	TSC22_domain_family_member_3
ENSG00000147119	21.7996800907342	306.965504346333	3.80773608710504	2.95712644817549e-13	5.20168765828442e-12	CHST7	chrX	+	46573784	46598408	2289	protein_coding	carbohydrate_(N-acetylglucosamine_6-O)_sulfotransferase_7
ENSG00000277147	578.277737280189	48.5276148813543	-3.57163676040472	2.96921665399487e-13	5.21954995382175e-12	LINC00869	chr1	+	149606334	149679523	8501	lincRNA	long_intergenic_non-protein_coding_RNA_869
ENSG00000146267	235.100491125924	13.7176178423347	-4.0873780864548	3.01853175919e-13	5.30278354516727e-12	FAXC	chr6	-	99271169	99350062	11662	protein_coding	failed_axon_connections_homolog
ENSG00000105270	52.1358115381801	607.59732827833	3.53948362402006	3.07332533689611e-13	5.39552676007425e-12	CLIP3	chr19	-	36014660	36033343	3772	protein_coding	CAP-Gly_domain_containing_linker_protein_3
ENSG00000164532	2.83950028546094	120.257316815662	5.34152695767624	3.10310652490888e-13	5.44426613862673e-12	TBX20	chr7	-	35202430	35254147	1875	protein_coding	T-box_20
ENSG00000062725	13739.4093954406	1427.21461435297	-3.26693782647527	3.16071132817413e-13	5.54172572662832e-12	APPBP2	chr17	-	60443149	60526219	9876	protein_coding	amyloid_beta_precursor_protein_(cytoplasmic_tail)_binding_protein_2
ENSG00000149654	1.38777878078145e-17	81.2279206208934	9.34809351865547	3.2788466153623e-13	5.7451187673723e-12	CDH22	chr20	-	46173733	46308498	4929	protein_coding	cadherin_22_type_2
ENSG00000163349	17555.1232119467	1832.2764389013	-3.26009898762626	3.40619412713846e-13	5.96437862548154e-12	HIPK1	chr1	+	113929192	113977869	9280	protein_coding	homeodomain_interacting_protein_kinase_1
ENSG00000197892	1015.30732082748	94.9409518155041	-3.41709979358115	3.40946532050289e-13	5.9662324356055e-12	KIF13B	chr8	-	29067279	29263124	11112	protein_coding	kinesin_family_member_13B
ENSG00000035862	299.564725799424	2964.12888076125	3.30610503732193	3.42194279913115e-13	5.98148423155411e-12	TIMP2	chr17	-	78852977	78925387	5633	protein_coding	TIMP_metallopeptidase_inhibitor_2
ENSG00000157782	0.943449169558452	95.9958003638751	6.4852898850163	3.42261743279982e-13	5.98148423155411e-12	CABP1	chr12	+	120640552	120667324	5858	protein_coding	calcium_binding_protein_1
ENSG00000196878	315.680784391256	3117.08191343601	3.30312311326902	3.43780184308967e-13	6.0041298251785e-12	LAMB3	chr1	-	209614870	209652466	4688	protein_coding	laminin_subunit_beta_3
ENSG00000253910	151.676185981193	5.2788609071888	-4.81336957172746	3.61300146118365e-13	6.30195326017323e-12	PCDHGB2	chr5	+	141360042	141512979	4769	protein_coding	protocadherin_gamma_subfamily_B_2
ENSG00000057593	151.676185981193	5.2788609071888	-4.81336957172746	3.61300146118365e-13	6.30195326017323e-12	F7	chr13	+	113105788	113120681	3795	protein_coding	coagulation_factor_VII_(serum_prothrombin_conversion_accelerator)
ENSG00000162496	182.012297246063	8.44338646668029	-4.41069661278947	3.73160163161216e-13	6.50461341939582e-12	DHRS3	chr1	-	12567910	12617731	3036	protein_coding	dehydrogenase/reductase_(SDR_family)_member_3
ENSG00000166130	255.008563662714	2533.75069226114	3.31199477985737	3.73825007900167e-13	6.51199299937721e-12	IKBIP	chr12	-	98613405	98645113	4163	protein_coding	IKBKB_interacting_protein
ENSG00000142303	4.73554534719345	130.805802150895	4.75021610092274	3.76678682535355e-13	6.55746762637081e-12	ADAMTS10	chr19	-	8580242	8610735	5703	protein_coding	ADAM_metallopeptidase_with_thrombospondin_type_1_motif_10
ENSG00000158023	78.6799143970564	847.047938374799	3.42621412486907	4.05074634419379e-13	7.04434584659043e-12	WDR66	chr12	+	121917862	122003927	16115	protein_coding	WD_repeat_domain_66
ENSG00000142149	79.6279179979974	1.38777878078145e-17	-9.31959700584113	4.05952438092469e-13	7.04434584659043e-12	HUNK	chr21	+	31873315	32044633	8294	protein_coding	hormonally_up-regulated_Neu-associated_kinase
ENSG00000232759	1.38777878078145e-17	80.1730720619615	9.32926361868955	4.05952438092469e-13	7.04434584659043e-12	AC002480.3	chr7	+	22563337	22573996	2432	antisense	NA
ENSG00000197479	79.6279179979974	1.38777878078145e-17	-9.31959700584113	4.05952438092469e-13	7.04434584659043e-12	PCDHB11	chr5	+	141199582	141203779	4198	protein_coding	protocadherin_beta_11
ENSG00000104327	1.38777878078145e-17	80.1730720619615	9.32926361868955	4.05952438092469e-13	7.04434584659043e-12	CALB1	chr8	-	90058608	90095475	7138	protein_coding	calbindin_1
ENSG00000103657	1792.67013624867	177.219137257201	-3.33762923910341	4.09412353142731e-13	7.09981576517485e-12	HERC1	chr15	-	63608618	63833942	17053	protein_coding	HECT_and_RLD_domain_containing_E3_ubiquitin_protein_ligase_family_member_1
ENSG00000173093	93.8479716509211	1.05955866386509	-6.31585433299501	4.12738809598308e-13	7.15290150361695e-12	CCDC63	chr12	+	110846769	110907535	2184	protein_coding	coiled-coil_domain_containing_63
ENSG00000089041	1.89146593041347	106.544285813075	5.72198941064674	4.46110411499211e-13	7.72627704334472e-12	P2RX7	chr12	+	121132819	121188032	5546	protein_coding	purinergic_receptor_P2X_ligand_gated_ion_channel_7
ENSG00000082497	366.87297037372	27.4306436953507	-3.735618051911	4.48880095624033e-13	7.7692558784324e-12	SERTAD4	chr1	+	210232799	210246631	5467	protein_coding	SERTA_domain_containing_4
ENSG00000116667	1132.8597466293	108.653982895952	-3.38072521242694	4.59961044951616e-13	7.95593940870126e-12	C1orf21	chr1	+	184387058	184629020	10971	protein_coding	chromosome_1_open_reading_frame_21
ENSG00000140465	210.452401207539	11.6079237420807	-4.16633122966176	4.65063526418095e-13	8.03904041883997e-12	CYP1A1	chr15	-	74719542	74725610	3435	protein_coding	cytochrome_P450_family_1_subfamily_A_member_1
ENSG00000144152	23.6956895133084	318.568837936785	3.7416069995797	4.74255619426639e-13	8.19268227639895e-12	FBLN7	chr2	+	112138385	112188216	6578	protein_coding	fibulin_7
ENSG00000174705	166.844241673367	1667.72007268545	3.32029073462292	4.7575486871644e-13	8.21331996786652e-12	SH3PXD2B	chr5	-	172325181	172454523	7977	protein_coding	SH3_and_PX_domains_2B
ENSG00000170175	69.1998781712611	754.221270168358	3.44368543137747	4.8109200212156e-13	8.30014518823415e-12	CHRNB1	chr17	+	7445061	7457707	4329	protein_coding	cholinergic_receptor_nicotinic_beta_1
ENSG00000182103	0.943449169558452	93.8861032664596	6.45327077785951	4.98430371946101e-13	8.58280549801951e-12	FAM181B	chr11	-	82729941	82733864	3924	protein_coding	family_with_sequence_similarity_181_member_B
ENSG00000153823	0.943449169558452	93.8861032664596	6.45327077785951	4.98430371946101e-13	8.58280549801951e-12	PID1	chr2	-	228850526	229271285	3364	protein_coding	phosphotyrosine_interaction_domain_containing_1
ENSG00000258484	92.8999680922543	1.05955866386509	-6.30122711007381	4.98430371946101e-13	8.58280549801951e-12	SPESP1	chr15	+	68818221	68946811	1588	protein_coding	sperm_equatorial_segment_protein_1
ENSG00000196155	254.060560210101	2487.33735820628	3.29069421173563	5.02542780876385e-13	8.64314641875944e-12	PLEKHG4	chr16	+	67277510	67289499	7328	protein_coding	pleckstrin_homology_and_RhoGEF_domain_containing_G4
ENSG00000135917	1.38777878078145e-17	79.1182235021812	9.31018469914308	5.03537158787773e-13	8.64314641875944e-12	SLC19A3	chr2	-	227685210	227718012	5329	protein_coding	solute_carrier_family_19_(thiamine_transporter)_member_3
ENSG00000258811	78.6799143970564	1.38777878078145e-17	-9.30234621724044	5.03537158787773e-13	8.64314641875944e-12	CTD-3051D23.1	chr14	+	104842663	104845916	3254	lincRNA	NA
ENSG00000180318	1.38777878078145e-17	79.1182235021812	9.31018469914308	5.03537158787773e-13	8.64314641875944e-12	ALX1	chr12	+	85280107	85301784	1445	protein_coding	ALX_homeobox_1
ENSG00000160013	1.38777878078145e-17	79.1182235021812	9.31018469914308	5.03537158787773e-13	8.64314641875944e-12	PTGIR	chr19	-	46620468	46625118	3546	protein_coding	prostaglandin_I2_(prostacyclin)_receptor_(IP)
ENSG00000245248	10.4236106947186	190.932168002983	4.17826246680768	5.13952180465068e-13	8.8163069328378e-12	USP2-AS1	chr11	+	119381778	119526664	4762	antisense	USP2_antisense_RNA_1_(head_to_head)
ENSG00000180667	16.1116492227514	250.003684810232	3.94494127079056	5.19194717462562e-13	8.90057517552158e-12	YOD1	chr1	-	207043849	207052980	6521	protein_coding	YOD1_deubiquitinase
ENSG00000181982	731.854293899755	66.4600407147879	-3.45864428293552	5.24268708014529e-13	8.98184878038106e-12	CCDC149	chr4	-	24806117	24980204	9582	protein_coding	coiled-coil_domain_containing_149
ENSG00000120324	104.276010661215	2.11437967028788	-5.54608543423767	5.28872933971846e-13	9.04923067099289e-12	PCDHB10	chr5	+	141182560	141195642	3753	protein_coding	protocadherin_beta_10
ENSG00000279631	104.276010661215	2.11437967028788	-5.54608543423767	5.28872933971846e-13	9.04923067099289e-12	RP11-573G6.4	chr10	+	22252072	22254589	2518	TEC	NA
ENSG00000169902	84.3679359530773	891.351575465657	3.39921496766295	5.29876736798416e-13	9.06065699715033e-12	TPST1	chr7	+	66205199	66420543	2871	protein_coding	tyrosylprotein_sulfotransferase_1
ENSG00000145632	1117.69169168889	10487.3083909062	3.2299000715495	5.42766207514951e-13	9.27517969065156e-12	PLK2	chr5	-	58453982	58460260	4768	protein_coding	polo-like_kinase_2
ENSG00000134262	1487.41303075919	147.683378613098	-3.33117717138969	5.43455888621228e-13	9.28108390915771e-12	AP4B1	chr1	-	113894748	113905201	5369	protein_coding	adaptor_related_protein_complex_4_beta_1_subunit
ENSG00000104081	522.345534485695	44.3082205480991	-3.55580520644496	5.67106295360777e-13	9.67885339284729e-12	BMF	chr15	-	40087890	40108892	5447	protein_coding	Bcl2_modifying_factor
ENSG00000159433	18.007660057365	267.936109498233	3.88553748725605	5.74869440575865e-13	9.80514189409790e-12	STARD9	chr15	+	42575659	42720981	20706	protein_coding	StAR_related_lipid_transfer_domain_containing_9
ENSG00000130775	3.7875259485201	127.641256554483	5.02762061334678	5.78920433552523e-13	9.86799520301981e-12	THEMIS2	chr1	+	27872543	27886685	4621	protein_coding	thymocyte_selection_associated_family_member_2
ENSG00000183696	22.747684842905	305.910655837847	3.7417135188393	5.87796312709173e-13	1.00129598032316e-11	UPP1	chr7	+	48088628	48108733	4577	protein_coding	uridine_phosphorylase_1
ENSG00000142319	91.9519645312981	1.05955866386509	-6.28645006407121	6.02774925770577e-13	1.02616342476827e-11	SLC6A3	chr5	-	1392790	1445430	4461	protein_coding	solute_carrier_family_6_(neurotransmitter_transporter)_member_3
ENSG00000105255	109.964031849833	1127.63763989345	3.35665982132807	6.04898736903592e-13	1.02912929585756e-11	FSD1	chr19	+	4304600	4323843	3111	protein_coding	fibronectin_type_III_and_SPRY_domain_containing_1
ENSG00000249867	1.38777878078145e-17	78.0633749415403	9.29085008523224	6.25754915775107e-13	1.06059755240676e-11	RP11-115J23.1	chr11	+	28702615	29063821	1512	lincRNA	NA
ENSG00000187094	1.38777878078145e-17	78.0633749415403	9.29085008523224	6.25754915775107e-13	1.06059755240676e-11	CCK	chr3	-	42257825	42266207	2085	protein_coding	cholecystokinin
ENSG00000197291	1.38777878078145e-17	78.0633749415403	9.29085008523224	6.25754915775107e-13	1.06059755240676e-11	RAMP2-AS1	chr17	-	42753914	42761257	4168	lincRNA	RAMP2_antisense_RNA_1
ENSG00000119865	1.38777878078145e-17	78.0633749415403	9.29085008523224	6.25754915775107e-13	1.06059755240676e-11	CNRIP1	chr2	-	68284171	68320051	3548	protein_coding	cannabinoid_receptor_interacting_protein_1
ENSG00000125878	1.38777878078145e-17	78.0633749415403	9.29085008523224	6.25754915775107e-13	1.06059755240676e-11	TCF15	chr20	-	603797	610398	1555	protein_coding	transcription_factor_15_(basic_helix-loop-helix)
ENSG00000258732	1.38777878078145e-17	78.0633749415403	9.29085008523224	6.25754915775107e-13	1.06059755240676e-11	RP11-603B24.1	chr15	+	22278971	22282872	378	unprocessed_pseudogene	NA
ENSG00000226067	510.021489794497	43.2533719659531	-3.55603395035495	6.2736235508278e-13	1.06192019497897e-11	LINC00623	chr1	+	120913275	121009291	2075	lincRNA	long_intergenic_non-protein_coding_RNA_623
ENSG00000174837	1.89146593041347	104.434588727989	5.6931686543356	6.27716676851026e-13	1.06192019497897e-11	ADGRE1	chr19	+	6887566	6940459	3707	protein_coding	adhesion_G_protein-coupled_receptor_E1
ENSG00000152784	1.89146593041347	104.434588727989	5.6931686543356	6.27716676851026e-13	1.06192019497897e-11	PRDM8	chr4	+	80183879	80204329	4588	protein_coding	PR_domain_containing_8
ENSG00000165879	462.621317873224	39.0339776509311	-3.56299495404525	6.60445036296374e-13	1.1165868870701e-11	FRAT1	chr10	+	97319267	97321915	2649	protein_coding	frequently_rearranged_in_advanced_T-cell_lymphomas_1
ENSG00000115526	79.6279179979974	833.334907845764	3.38541949975113	6.91657827365873e-13	1.16862437172607e-11	CHST10	chr2	-	100391860	100417656	4487	protein_coding	carbohydrate_sulfotransferase_10
ENSG00000165512	60.6678451422579	657.175207921381	3.43446894150396	6.9309588485573e-13	1.17032082849215e-11	ZNF22	chr10	+	45000475	45005326	2551	protein_coding	zinc_finger_protein_22
ENSG00000237289	91.0039609679889	1.05955866386509	-6.27152009399445	7.30023438017052e-13	1.23190313076144e-11	CKMT1B	chr15	+	43593054	43604901	3470	protein_coding	creatine_kinase_mitochondrial_1B
ENSG00000146476	6806.66029223918	729.959754610057	-3.22084805447244	7.54661033996558e-13	1.27268226658857e-11	ARMT1	chr6	+	151452258	151470101	2819	protein_coding	acidic_residue_methyltransferase_1
ENSG00000170476	145.0401615695	5.2788609071888	-4.74888359168015	7.66253535343104e-13	1.29061791593143e-11	MZB1	chr5	-	139387480	139390081	2273	protein_coding	marginal_zone_B_and_B1_cell-specific_protein
ENSG00000223855	145.98816505884	5.2788609071888	-4.75827423457619	7.66253535343104e-13	1.29061791593143e-11	HRAT92	chr7	+	520391	525232	3506	lincRNA	heart_tissue-associated_transcript_92
ENSG00000204118	76.7839071843923	1.38777878078145e-17	-9.26721320782987	7.79126218661156e-13	1.30658691619507e-11	NAP1L6	chrX	-	73126037	73128080	2044	protein_coding	nucleosome_assembly_protein_1-like_6
ENSG00000279108	76.7839071843923	1.38777878078145e-17	-9.26721320782987	7.79126218661156e-13	1.30658691619507e-11	CTC-490E21.11	chr19	+	40840159	40842039	1881	TEC	NA
ENSG00000184937	1.38777878078145e-17	77.0085263800277	9.27125283015461	7.79126218661156e-13	1.30658691619507e-11	WT1	chr11	-	32387775	32435630	4113	protein_coding	Wilms_tumor_1
ENSG00000271347	1.38777878078145e-17	77.0085263800277	9.27125283015461	7.79126218661156e-13	1.30658691619507e-11	RP11-701H24.7	chr15	+	24991486	24991753	268	sense_intronic	NA
ENSG00000262576	76.7839071843923	1.38777878078145e-17	-9.26721320782987	7.79126218661156e-13	1.30658691619507e-11	PCDHGA4	chr5	+	141355025	141512979	4887	protein_coding	protocadherin_gamma_subfamily_A_4
ENSG00000186469	1.38777878078145e-17	77.0085263800277	9.27125283015461	7.79126218661156e-13	1.30658691619507e-11	GNG2	chr14	+	51826195	51979342	6379	protein_coding	guanine_nucleotide_binding_protein_(G_protein)_gamma_2
ENSG00000196932	76.7839071843923	1.38777878078145e-17	-9.26721320782987	7.79126218661156e-13	1.30658691619507e-11	TMEM26	chr10	-	61406643	61453450	6907	protein_coding	transmembrane_protein_26
ENSG00000172461	14.215637608667	224.687320505344	3.97008335517813	8.25870828833412e-13	1.38411639343206e-11	FUT9	chr6	+	96015984	96215612	13719	protein_coding	fucosyltransferase_9_(alpha_(13)_fucosyltransferase)
ENSG00000185436	11.3716180425464	195.151562073159	4.08566952756278	8.31214849143983e-13	1.39220742993892e-11	IFNLR1	chr1	-	24154157	24187959	4923	protein_coding	interferon_lambda_receptor_1
ENSG00000068831	10.4236106947186	185.65792541179	4.13787497564489	8.52669077978254e-13	1.4272547707487e-11	RASGRP2	chr11	-	64726911	64745456	6084	protein_coding	RAS_guanyl_releasing_protein_2_(calcium_and_DAG-regulated)
ENSG00000274265	694.882159919633	64.3503435704753	-3.43032363307168	8.78960059450777e-13	1.4703496875403e-11	CH17-189H20.1	chr1	+	149176022	149251013	1331	lincRNA	NA
ENSG00000242173	101.432000044745	2.11437967028788	-5.50624106572022	8.87413050566902e-13	1.48356976575245e-11	ARHGDIG	chr16	+	268727	283010	2429	protein_coding	Rho_GDP_dissociation_inhibitor_(GDI)_gamma
ENSG00000256546	3.7875259485201	124.47671095459	4.99143625978864	8.9638319692677e-13	1.49763750237468e-11	AC156455.1	chr12	+	122063306	122068616	1831	processed_transcript	NA
ENSG00000114631	211.400404668648	2025.31371464597	3.25929965679285	8.99141699062685e-13	1.50131610259594e-11	PODXL2	chr3	+	127629181	127672809	2186	protein_coding	podocalyxin-like_2
ENSG00000163406	193.388338863026	10.5530773088976	-4.18038504741091	9.16423421628817e-13	1.52922487547294e-11	SLC15A2	chr3	+	121894089	121944102	6210	protein_coding	solute_carrier_family_15_(oligopeptide_transporter)_member_2
ENSG00000280734	269.228615435881	18.9918569258258	-3.81696598900385	9.1931908857295e-13	1.53310813496958e-11	LINC01232	chr13	-	99486962	99499306	6199	processed_transcript	long_intergenic_non-protein_coding_RNA_1232
ENSG00000095585	112.808042424002	3.16919693313913	-5.1015671429072	9.25095280080717e-13	1.54083504154766e-11	BLNK	chr10	-	96191702	96271587	3655	protein_coding	B-cell_linker
ENSG00000273274	2.83950028546094	113.92822559399	5.26360755221188	9.25095280080717e-13	1.54083504154766e-11	ZBTB8B	chr1	+	32465069	32496686	12834	protein_coding	zinc_finger_and_BTB_domain_containing_8B
ENSG00000118194	30.3317204673078	371.31126329168	3.60806416720277	9.87270868005201e-13	1.64337939670545e-11	TNNT2	chr1	-	201359008	201377762	7259	protein_coding	troponin_T_type_2_(cardiac)
ENSG00000225439	8.5275940924434	164.560955002754	4.24968930740913	9.87963383472438e-13	1.64351761867475e-11	BOLA3-AS1	chr2	+	74148009	74150061	1834	antisense	BOLA3_antisense_RNA_1_(head_to_head)
ENSG00000225526	143.144154588759	5.2788609071888	-4.72991691845602	9.89448970613178e-13	1.64497416409093e-11	MKRN2OS	chr3	-	12514934	12561059	1829	protein_coding	MKRN2_opposite_strand
ENSG00000196405	5724.04037209217	620.255510316161	-3.20585222789531	1.00444861972364e-12	1.66888240785383e-11	EVL	chr14	+	99971449	100144236	10621	protein_coding	Enah/Vasp-like
ENSG00000150593	4894.53736846435	529.538539020742	-3.20807546396417	1.03136081781167e-12	1.71254161410773e-11	PDCD4	chr10	+	110871795	110900006	4547	protein_coding	programmed_cell_death_4_(neoplastic_transformation_inhibitor)
ENSG00000131711	194.336342329007	1857.59280293386	3.25594133458922	1.036952353164e-12	1.72076659417973e-11	MAP1B	chr5	+	72107234	72209570	12630	protein_coding	microtubule_associated_protein_1B
ENSG00000226891	100.483996502362	2.11437967028788	-5.49271126132466	1.05703583812967e-12	1.75301527742956e-11	LINC01359	chr1	-	64972225	65002489	6617	processed_transcript	long_intergenic_non-protein_coding_RNA_1359
ENSG00000120129	200.972366582627	1918.77401601193	3.25427909911407	1.06212798518916e-12	1.76037758135286e-11	DUSP1	chr5	-	172768090	172771195	2019	protein_coding	dual_specificity_phosphatase_1
ENSG00000173581	40.7597653317094	462.028234753501	3.49857277978934	1.06727795789332e-12	1.76782662239258e-11	CCDC106	chr19	+	55641062	55653161	2709	protein_coding	coiled-coil_domain_containing_106
ENSG00000117228	2.83950028546094	112.873377055392	5.25020179318458	1.08558573269741e-12	1.79594508392138e-11	GBP1	chr1	-	89052319	89065360	4992	protein_coding	guanylate_binding_protein_1_interferon-inducible
ENSG00000173376	2.83950028546094	112.873377055392	5.25020179318458	1.08558573269741e-12	1.79594508392138e-11	NDNF	chr4	-	121035613	121073021	3556	protein_coding	neuron-derived_neurotrophic_factor
ENSG00000124216	7.57958445112432	154.012469766748	4.32151363173847	1.12481074183719e-12	1.85969628843541e-11	SNAI1	chr20	+	49982999	49988886	1686	protein_coding	snail_family_zinc_finger_1
ENSG00000205744	575.433726969827	52.7470092132371	-3.44452750617716	1.19635860977538e-12	1.9767773450492e-11	DENND1C	chr19	-	6467207	6482557	4657	protein_coding	DENN/MADD_domain_containing_1C
ENSG00000061918	3.7875259485201	122.36701388597	4.96679912432226	1.20482656662974e-12	1.98864649888088e-11	GUCY1B3	chr4	+	155758992	155807591	3724	protein_coding	guanylate_cyclase_1_soluble_beta_3
ENSG00000153234	228.464466930526	14.7724653244214	-3.94010798558747	1.20501682829168e-12	1.98864649888088e-11	NR4A2	chr2	-	156324432	156342348	3967	protein_coding	nuclear_receptor_subfamily_4_group_A_member_2
ENSG00000159167	74.8878999565586	1.38777878078145e-17	-9.23120322645825	1.21497405385279e-12	2.00385261995073e-11	STC1	chr8	-	23841915	23854807	4149	protein_coding	stanniocalcin_1
ENSG00000101311	31.2797246983149	376.585505822952	3.58419106065038	1.22755428967335e-12	2.02336362929899e-11	FERMT1	chr20	-	6074845	6123544	5359	protein_coding	fermitin_family_member_1
ENSG00000079435	19.9036703031239	275.320049069991	3.7812967935077	1.2474341111476e-12	2.05487527435591e-11	LIPE	chr19	-	42401507	42427426	5206	protein_coding	lipase_hormone-sensitive
ENSG00000214076	5.68356074469745	132.915499213323	4.51642614791474	1.26389660046023e-12	2.08072257191762e-11	CPSF1P1	chr22	+	32269381	32273110	3730	processed_pseudogene	cleavage_and_polyadenylation_specific_factor_1_pseudogene_1
ENSG00000104870	10.4236106947186	181.438531335887	4.10473065406039	1.28785891708507e-12	2.11887758133715e-11	FCGRT	chr19	+	49506816	49526333	4173	protein_coding	Fc_fragment_of_IgG_receptor_transporter_alpha
ENSG00000114405	4159.83470809343	453.589446716282	-3.19672966604262	1.29985591207126e-12	2.13731186127522e-11	C3orf14	chr3	+	62318973	62336213	4430	protein_coding	chromosome_3_open_reading_frame_14
ENSG00000140398	264.488598181374	18.9918569258258	-3.79135216252373	1.31846889123755e-12	2.16659549793491e-11	NEIL1	chr15	+	75346955	75357114	6938	protein_coding	nei-like_DNA_glycosylase_1
ENSG00000249628	16.1116492227514	237.345502664203	3.87001761065197	1.34351562431625e-12	2.20640939861826e-11	LINC00942	chr12	-	1500525	1507318	2417	lincRNA	long_intergenic_non-protein_coding_RNA_942
ENSG00000088899	61.615848836786	644.517025886118	3.38409229580056	1.36181358736947e-12	2.23509830779093e-11	RP5-1187M17.10	chr20	-	3162617	3173592	5395	protein_coding	Leucine_zipper_putative_tumor_suppressor_3_
ENSG00000174939	95.7439787616289	948.313394576631	3.30634779034478	1.36880519973469e-12	2.24520687445534e-11	ASPHD1	chr16	+	29900375	29919864	2312	protein_coding	aspartate_beta-hydroxylase_domain_containing_1
ENSG00000124191	15.1636435283222	227.851866046361	3.89792552179263	1.42474195021733e-12	2.33553747292161e-11	TOX2	chr20	+	43914864	44069616	3223	protein_coding	TOX_high_mobility_group_box_family_member_2
ENSG00000125657	41.7077692663269	463.083083258086	3.46879519538257	1.44088962685021e-12	2.36057288442544e-11	TNFSF9	chr19	+	6530999	6535928	1665	protein_coding	tumor_necrosis_factor_superfamily_member_9
ENSG00000010810	76.7839071843923	776.37308871988	3.3356722632284	1.4455363679284e-12	2.36674764405326e-11	FYN	chr6	-	111660332	111873452	7411	protein_coding	FYN_proto-oncogene_Src_family_tyrosine_kinase
ENSG00000136048	4677.44458236943	514.770659966403	-3.18342175160674	1.45998221890899e-12	2.38894906038226e-11	DRAM1	chr12	+	101877351	102012130	4180	protein_coding	DNA_damage_regulated_autophagy_modulator_1
ENSG00000132205	17.0596547238187	245.784290762876	3.83855050187924	1.48360684921037e-12	2.4261335534146e-11	EMILIN2	chr18	+	2847030	2915993	6435	protein_coding	elastin_microfibril_interfacer_2
ENSG00000222009	9.47560276457628	170.890046133594	4.15417520104365	1.49930991623519e-12	2.45032673946655e-11	BTBD19	chr1	+	44808482	44815585	3520	protein_coding	BTB_(POZ)_domain_containing_19
ENSG00000237172	188.648321528437	10.5530773088976	-4.14460770675348	1.50133827942956e-12	2.45215554470609e-11	B3GNT9	chr16	-	67148105	67151214	2917	protein_coding	UDP-GlcNAc:betaGal_beta-13-N-acetylglucosaminyltransferase_9
ENSG00000100427	1.89146593041347	99.1603460050651	5.61849249743309	1.50528750821379e-12	2.45711761177319e-11	MLC1	chr22	-	50059391	50085902	4297	protein_coding	megalencephalic_leukoencephalopathy_with_subcortical_cysts_1
ENSG00000248124	1.38777878078145e-17	74.8988292543413	9.23124115824204	1.5217856836136e-12	2.47356677180979e-11	RRN3P1	chr16	-	21796106	21820410	5253	transcribed_unprocessed_pseudogene	RRN3_homolog_RNA_polymerase_I_transcription_factor_pseudogene_1
ENSG00000135374	73.9398963366355	1.38777878078145e-17	-9.21285547272271	1.5217856836136e-12	2.47356677180979e-11	ELF5	chr11	-	34478793	34513805	4494	protein_coding	E74-like_factor_5_(ets_domain_transcription_factor)
ENSG00000231574	73.9398963366355	1.38777878078145e-17	-9.21285547272271	1.5217856836136e-12	2.47356677180979e-11	KCCAT211	chr3	+	177816865	177899224	3005	lincRNA	renal_clear_cell_carcinoma-associated_transcript_211
ENSG00000257084	73.9398963366355	1.38777878078145e-17	-9.21285547272271	1.5217856836136e-12	2.47356677180979e-11	U47924.27	chr12	+	6963246	6964447	350	lincRNA	NA
ENSG00000106511	1.38777878078145e-17	74.8988292543413	9.23124115824204	1.5217856836136e-12	2.47356677180979e-11	MEOX2	chr7	-	15611212	15686812	2500	protein_coding	mesenchyme_homeobox_2
ENSG00000253154	73.9398963366355	1.38777878078145e-17	-9.21285547272271	1.5217856836136e-12	2.47356677180979e-11	CTA-392E5.1	chr8	+	85839705	85951083	813	lincRNA	NA
ENSG00000248969	1.38777878078145e-17	74.8988292543413	9.23124115824204	1.5217856836136e-12	2.47356677180979e-11	CTD-2113L7.1	chr5	-	35678484	35827018	540	antisense	NA
ENSG00000147251	20.8516752476805	281.649140129133	3.74736649956391	1.55396485920554e-12	2.52435038514075e-11	DOCK11	chrX	+	118495898	118686163	6721	protein_coding	dedicator_of_cytokinesis_11
ENSG00000156398	1250.41217240302	129.750953619133	-3.26739945694383	1.59275046957729e-12	2.58579826385437e-11	SFXN2	chr10	+	102714538	102743492	8034	protein_coding	sideroflexin_2
ENSG00000105339	182.960300716023	1720.46249775549	3.23227642048965	1.59839534362979e-12	2.59340125368958e-11	DENND3	chr8	+	141117278	141195808	14670	protein_coding	DENN/MADD_domain_containing_3
ENSG00000155066	3107.55089771107	339.665808088848	-3.19313950705196	1.60942089361382e-12	2.60972001306016e-11	PROM2	chr2	+	95274453	95291308	6063	protein_coding	prominin_2
ENSG00000172965	156.416203399772	1479.95703942801	3.24101958081878	1.64216719472654e-12	2.66121878443485e-11	MIR4435-2HG	chr2	-	111196350	111495100	8500	lincRNA	MIR4435-2_host_gene
ENSG00000160469	26.539703107702	325.952777491732	3.61196381952534	1.68638473488927e-12	2.73123427994138e-11	BRSK1	chr19	+	55282072	55312533	3841	protein_coding	BR_serine/threonine_kinase_1
ENSG00000267750	108.068024793163	3.16919693313913	-5.03970932693112	1.76513294641285e-12	2.85534343329148e-11	RUNDC3A-AS1	chr17	-	44299574	44315315	5403	antisense	RUNDC3A_antisense_RNA_1
ENSG00000224950	109.016028322243	3.16919693313913	-5.05229489086392	1.76513294641285e-12	2.85534343329148e-11	RP5-1086K13.1	chr1	-	116493016	116499212	2302	lincRNA	NA
ENSG00000115419	831.394654569346	7405.04107061629	3.1547016421953	1.81877612828295e-12	2.9403547407241e-11	GLS	chr2	+	190880827	190965552	9827	protein_coding	glutaminase
ENSG00000155304	760.294396954493	6768.96742443379	3.15408623371355	1.88508461548134e-12	3.0457274859838e-11	HSPA13	chr21	-	14371115	14383484	4194	protein_coding	heat_shock_protein_family_A_(Hsp70)_member_13
ENSG00000204301	12.3196249236669	196.206410590334	3.9791696644126	1.89130976905226e-12	3.05395564265049e-11	NOTCH4	chr6	-	32194843	32224067	9748	protein_coding	notch_4
ENSG00000162614	6.63157350604578	139.244590392279	4.36551886568922	1.89642635992162e-12	3.06038499231876e-11	NEXN	chr1	+	77888513	77943895	4436	protein_coding	nexilin_(F_actin_binding_protein)
ENSG00000102383	1.38777878078145e-17	73.8439806901469	9.2108113475273	1.90999631718850e-12	3.07859896529021e-11	ZDHHC15	chrX	-	75368427	75523502	6820	protein_coding	zinc_finger_DHHC-type_containing_15
ENSG00000260300	72.9918927125271	1.38777878078145e-17	-9.19427136881809	1.90999631718850e-12	3.07859896529021e-11	RP11-505K9.4	chr16	+	83908132	83951445	3055	protein_coding	NA
ENSG00000151726	2247.71178409767	244.729442250836	-3.19857178379118	1.91908338771117e-12	3.09041639993656e-11	ACSL1	chr4	-	184755595	184826818	6284	protein_coding	acyl-CoA_synthetase_long-chain_family_member_1
ENSG00000149243	54.9798228174501	580.171267192901	3.3964173847812	1.91962006596964e-12	3.09041639993656e-11	KLHL35	chr11	-	75422394	75430629	5041	protein_coding	kelch_like_family_member_35
ENSG00000262585	85.3159395348508	1.05955866386509	-6.1785424176424	1.9456089946344e-12	3.12293405650662e-11	RP11-353N14.5	chr17	-	79915252	79926725	5271	lincRNA	NA
ENSG00000273812	0.943449169558452	86.5021634032612	6.33525287048047	1.9456089946344e-12	3.12293405650662e-11	WI2-87327B8.2	chr20	-	62596732	62603115	625	lincRNA	NA
ENSG00000249741	0.943449169558452	86.5021634032612	6.33525287048047	1.9456089946344e-12	3.12293405650662e-11	RP11-673E1.3	chr4	-	143911514	143912053	540	processed_pseudogene	NA
ENSG00000149043	85.3159395348508	1.05955866386509	-6.1785424176424	1.9456089946344e-12	3.12293405650662e-11	SYT8	chr11	+	1828307	1837521	4704	protein_coding	synaptotagmin_8
ENSG00000185710	85.3159395348508	1.05955866386509	-6.1785424176424	1.9456089946344e-12	3.12293405650662e-11	SMG1P4	chr16	-	21879338	21919156	6290	transcribed_unprocessed_pseudogene	SMG1_pseudogene_4
ENSG00000124762	8404.04607632428	952.532788584618	-3.14108349976276	1.95744186687392e-12	3.14005814289840e-11	CDKN1A	chr6	+	36676460	36687339	3050	protein_coding	cyclin-dependent_kinase_inhibitor_1A_(p21_Cip1)
ENSG00000166833	763.138407259666	75.9536778176314	-3.32671518343899	1.96835123636664e-12	3.15380626499481e-11	NAV2	chr11	+	19350724	20121598	14535	protein_coding	neuron_navigator_2
ENSG00000111261	763.138407259666	75.9536778176314	-3.32671518343899	1.96835123636664e-12	3.15380626499481e-11	MANSC1	chr12	-	12326056	12350541	6015	protein_coding	MANSC_domain_containing_1
ENSG00000174307	3878.27768856519	431.4376281137	-3.16783825798053	2.00238274801272e-12	3.20642833627737e-11	PHLDA3	chr1	-	201464383	201469237	3138	protein_coding	pleckstrin_homology-like_domain_family_A_member_3
ENSG00000139629	2487.55665262665	272.155503539613	-3.19166397559445	2.00544476360177e-12	3.20942572672316e-11	GALNT6	chr12	-	51351247	51392867	7347	protein_coding	polypeptide_N-acetylgalactosaminyltransferase_6
ENSG00000069482	23.6956895133084	295.362170750398	3.63252967449377	2.03968208542304e-12	3.26228156082549e-11	GAL	chr11	+	68683779	68691175	1300	protein_coding	galanin/GMAP_prepropeptide
ENSG00000238083	50.2398039678286	534.812781539662	3.40875013209782	2.05568406196564e-12	3.28592628423032e-11	LRRC37A2	chr17	+	46511511	46555650	6756	protein_coding	leucine-rich_repeat_containing_37_member_A2
ENSG00000107829	1694.07777920284	182.493379855118	-3.2137438998094	2.14103500145174e-12	3.42032878253244e-11	FBXW4	chr10	-	101610664	101695295	5038	protein_coding	F-box_and_WD_repeat_domain_containing_4
ENSG00000100385	1.89146593041347	97.0506489115844	5.5875050327975	2.15444429213079e-12	3.439712538875e-11	IL2RB	chr22	-	37125838	37175054	4700	protein_coding	interleukin_2_receptor_subunit_beta
ENSG00000099958	4.73554534719345	118.147619743605	4.60352207297157	2.19976403035164e-12	3.50999034570783e-11	DERL3	chr22	-	23834503	23839128	3796	protein_coding	derlin_3
ENSG00000204267	91.9519645312981	899.790363482489	3.28880384166885	2.22111640180244e-12	3.54196480727408e-11	TAP2	chr6	-	32821833	32838780	6390	protein_coding	transporter_2_ATP-binding_cassette_sub-family_B_(MDR/TAP)
ENSG00000126709	102.380003585319	986.287940647461	3.26643145746247	2.2309912527697e-12	3.55560934528296e-11	IFI6	chr1	-	27666061	27672218	865	protein_coding	interferon_alpha-inducible_protein_6
ENSG00000250742	30.3317204673078	355.488535693696	3.54525890943169	2.32933332441554e-12	3.71014781017066e-11	RP11-834C11.4	chr12	+	54126098	54142493	2310	lincRNA	NA
ENSG00000230882	220.880439267093	14.7724653244214	-3.89143184178633	2.37066012848726e-12	3.77374386214802e-11	AC005077.14	chr7	-	76071469	76074963	3495	processed_pseudogene	NA
ENSG00000109667	0.943449169558452	85.4473148483846	6.31757653406289	2.37812129400631e-12	3.78338754065924e-11	SLC2A9	chr4	-	9771153	10054936	6614	protein_coding	solute_carrier_family_2_(facilitated_glucose_transporter)_member_9
ENSG00000124391	72.0438890840894	1.38777878078145e-17	-9.17544474601263	2.40226340924739e-12	3.80607726755377e-11	IL17C	chr16	+	88638591	88640473	1379	protein_coding	interleukin_17C
ENSG00000249574	1.38777878078145e-17	72.7891321250388	9.19008807232114	2.40226340924739e-12	3.80607726755377e-11	AC226118.1	chr7	+	379359	382712	2146	lincRNA	NA
ENSG00000131737	1.38777878078145e-17	72.7891321250388	9.19008807232114	2.40226340924739e-12	3.80607726755377e-11	KRT34	chr17	-	41377650	41382403	1751	protein_coding	keratin_34_type_I
ENSG00000107295	1.38777878078145e-17	72.7891321250388	9.19008807232114	2.40226340924739e-12	3.80607726755377e-11	SH3GL2	chr9	+	17579082	17797129	2682	protein_coding	SH3-domain_GRB2-like_2
ENSG00000198429	72.0438890840894	1.38777878078145e-17	-9.17544474601263	2.40226340924739e-12	3.80607726755377e-11	ZNF69	chr19	+	11887784	11914329	2931	protein_coding	zinc_finger_protein_69
ENSG00000244541	71.0958854511722	1.38777878078145e-17	-9.15636919087214	2.40226340924739e-12	3.80607726755377e-11	LINC01213	chr3	+	150238519	150240209	609	lincRNA	long_intergenic_non-protein_coding_RNA_1213
ENSG00000112769	1.38777878078145e-17	72.7891321250388	9.19008807232114	2.40226340924739e-12	3.80607726755377e-11	LAMA4	chr6	-	112108760	112254939	11575	protein_coding	laminin_subunit_alpha_4
ENSG00000124678	2.83950028546094	107.599134354785	5.1812382701315	2.45363798208035e-12	3.88519094684549e-11	TCP11	chr6	-	35118071	35148610	3306	protein_coding	t-complex_11_testis-specific
ENSG00000121690	6.63157350604578	137.134893333969	4.34351243843474	2.4717808411367e-12	3.91162219261105e-11	DEPDC7	chr11	+	33015864	33033582	3326	protein_coding	DEP_domain_containing_7
ENSG00000145246	34.1237371789089	389.243687895396	3.50681923726235	2.48099889665856e-12	3.92390711127829e-11	ATP10D	chr4	+	47485288	47593486	7965	protein_coding	ATPase_class_V_type_10D
ENSG00000105137	71.0958854511722	712.027330065599	3.32171897411807	2.52664484494008e-12	3.9937576136374e-11	SYDE1	chr19	+	15107403	15114988	3965	protein_coding	synapse_defective_1_Rho_GTPase_homolog_1_(C._elegans)
ENSG00000119698	5.68356074469745	127.641256554483	4.45806539539748	2.55188599701103e-12	4.03129219656704e-11	PPP4R4	chr14	+	94146128	94279735	4974	protein_coding	protein_phosphatase_4_regulatory_subunit_4
ENSG00000067082	337.484863628034	3011.59706331562	3.15713952832616	2.5566493022771e-12	4.0364522883609e-11	KLF6	chr10	-	3775996	3785281	6139	protein_coding	Kruppel-like_factor_6
ENSG00000086730	27.4877075203187	327.007625999424	3.56623020363115	2.6952138897832e-12	4.25272894978899e-11	LAT2	chr7	+	74199652	74229834	4545	protein_coding	linker_for_activation_of_T-cells_family_member_2
ENSG00000105926	168.740248625874	1546.41249502073	3.19505724586058	2.70048880148691e-12	4.25856029361965e-11	MPP6	chr7	+	24573268	24694193	9369	protein_coding	membrane_protein_palmitoylated_6
ENSG00000124766	8059.9208302587	929.326121540308	-3.11634529065857	2.77344397459884e-12	4.37105144471258e-11	SOX4	chr6	+	21592769	21598619	5851	protein_coding	SRY-box_4
ENSG00000173436	342.224880848797	28.4854921836256	-3.58111298242654	2.78206130034997e-12	4.38207155521246e-11	MINOS1	chr1	+	19596977	19629821	5227	protein_coding	mitochondrial_inner_membrane_organizing_system_1
ENSG00000231551	200.972366582627	12.6627706224009	-3.97562538310306	2.80740854148513e-12	4.41941498713881e-11	RP11-495P10.1	chr1	+	148402516	148432545	3245	lincRNA	NA
ENSG00000105642	2.83950028546094	106.544285813075	5.16704096281879	2.89755727967589e-12	4.55866567116336e-11	KCNN1	chr19	+	17951293	18000080	3981	protein_coding	potassium_channel_calcium_activated_intermediate/small_conductance_subfamily_N_alpha_member_1
ENSG00000112539	0.943449169558452	84.3924662927222	6.29968093254057	2.91149468644706e-12	4.57792219910971e-11	C6orf118	chr6	-	165279664	165309607	2240	protein_coding	chromosome_6_open_reading_frame_118
ENSG00000163975	123.236081097175	1154.0088524368	3.22579640316684	2.93282423246451e-12	4.6087726254451e-11	MFI2	chr3	-	196988621	197029816	8393	protein_coding	antigen_p97_(melanoma_associated)_identified_by_monoclonal_antibodies_133.2_and_96.5
ENSG00000143036	253.112556757346	18.9918569258258	-3.72795736763412	2.96870711482392e-12	4.66244356775432e-11	SLC44A3	chr1	+	94820342	94895246	2869	protein_coding	solute_carrier_family_44_member_3
ENSG00000134256	70.1478818136179	1.38777878078145e-17	-9.13703803214385	3.02785283873892e-12	4.74980102672681e-11	CD101	chr1	+	117001750	117036476	3828	protein_coding	CD101_molecule
ENSG00000164694	1.38777878078145e-17	71.7342835590081	9.1690627786455	3.02785283873892e-12	4.74980102672681e-11	FNDC1	chr6	+	159169397	159272109	6854	protein_coding	fibronectin_type_III_domain_containing_1
ENSG00000242265	802.006548092022	6969.38863964904	3.11913872019628	3.03163741731894e-12	4.75297294159434e-11	PEG10	chr7	+	94656325	94669695	6689	protein_coding	paternally_expressed_10
ENSG00000166897	14.215637608667	209.919441301194	3.87205470904635	3.08120630894939e-12	4.82787968199473e-11	ELFN2	chr22	-	37367960	37427470	8782	protein_coding	extracellular_leucine-rich_repeat_and_fibronectin_type_III_domain_containing_2
ENSG00000135378	720.478252676239	72.7891321250388	-3.30503741620704	3.08587036101776e-12	4.83237979995382e-11	PRRG4	chr11	+	32829943	32858123	5530	protein_coding	proline_rich_Gla_(G-carboxyglutamic_acid)_4_(transmembrane)
ENSG00000151136	94.7959752073596	2.11437967028788	-5.40875438209704	3.09955628307633e-12	4.85099447065793e-11	BTBD11	chr12	+	107318413	107659642	7924	protein_coding	BTB_(POZ)_domain_containing_11
ENSG00000176209	452.193280042689	41.1436748049736	-3.45439907170894	3.21424885857506e-12	5.02757741997304e-11	SMIM19	chr8	+	42541155	42555193	4056	protein_coding	small_integral_membrane_protein_19
ENSG00000184584	56.8758302912126	582.280964199651	3.35285223594619	3.23057957495453e-12	5.0501918155492e-11	TMEM173	chr5	-	139475534	139482935	3850	protein_coding	transmembrane_protein_173
ENSG00000172403	9.47560276457628	163.506106480198	4.09049715914342	3.27578815354285e-12	5.1178970653787e-11	SYNPO2	chr4	+	118850688	119061247	14034	protein_coding	synaptopodin_2
ENSG00000137801	478.737376332671	4167.71102061067	3.12160128093457	3.43807754295863e-12	5.368338102109e-11	THBS1	chr15	+	39581079	39599466	9158	protein_coding	thrombospondin_1
ENSG00000186073	72.9918927125271	716.246724076169	3.29233937882209	3.53783748279678e-12	5.52091004404502e-11	C15orf41	chr15	+	36579611	36810248	9009	protein_coding	chromosome_15_open_reading_frame_41
ENSG00000088992	17.0596547238187	234.180957125761	3.76881650910216	3.55684804181561e-12	5.5473663560208e-11	TESC	chr12	-	117038923	117099479	1926	protein_coding	tescalcin
ENSG00000205133	2662.93728770971	301.69126180344	-3.1413687840391	3.58322677318837e-12	5.5852770616068e-11	TRIQK	chr8	-	92883530	93017673	6724	protein_coding	triple_QxxK/R_motif_containing
ENSG00000142611	46.4477886864017	484.180053346817	3.37821252786928	3.69732975707825e-12	5.75980324837504e-11	PRDM16	chr1	+	3069168	3438621	9767	protein_coding	PR_domain_containing_16
ENSG00000106780	1563.25330542113	172.999743175568	-3.17482666676274	3.70405701855009e-12	5.76695159135229e-11	MEGF9	chr9	-	120600813	120714470	6298	protein_coding	multiple_EGF-like-domains_9
ENSG00000233930	93.8479716509211	2.11437967028788	-5.39427397464137	3.72516092655949e-12	5.7964621780498e-11	KRTAP5-AS1	chr11	+	1571353	1599184	2931	antisense	KRTAP5-1/KRTAP5-2_antisense_RNA_1
ENSG00000143753	420.909166530603	3665.60313405383	3.12207437790986	3.76414063132169e-12	5.85373796218113e-11	DEGS1	chr1	+	224175756	224193441	2515	protein_coding	delta(4)-desaturase_sphingolipid_1
ENSG00000251129	69.1998781712611	1.38777878078145e-17	-9.11744432674949	3.82465621735438e-12	5.93074638051629e-11	RP11-734I18.1	chr4	+	31997397	32155406	734	lincRNA	NA
ENSG00000137273	1.38777878078145e-17	70.679434992047	9.14772653298373	3.82465621735438e-12	5.93074638051629e-11	FOXF2	chr6	+	1389834	1395597	2187	protein_coding	forkhead_box_F2
ENSG00000264575	1.38777878078145e-17	70.679434992047	9.14772653298373	3.82465621735438e-12	5.93074638051629e-11	LINC00526	chr18	-	5236724	5238598	1875	lincRNA	long_intergenic_non-protein_coding_RNA_526
ENSG00000259240	69.1998781712611	1.38777878078145e-17	-9.11744432674949	3.82465621735438e-12	5.93074638051629e-11	RP11-108K3.1	chr15	+	51037488	51293912	561	lincRNA	NA
ENSG00000182968	1.38777878078145e-17	70.679434992047	9.14772653298373	3.82465621735438e-12	5.93074638051629e-11	SOX1	chr13	+	112067647	112070488	2842	protein_coding	SRY-box_1
ENSG00000048392	5133.43423351064	594.939146239513	-3.10885506865152	3.84661964025433e-12	5.96137616201715e-11	RRM2B	chr8	-	102204502	102239118	5548	protein_coding	ribonucleotide_reductase_M2_B_(TP53_inducible)
ENSG00000108830	24.6436941098209	294.307322241385	3.57107736546566	3.86484907210258e-12	5.98618725320609e-11	RND2	chr17	+	43025241	43032036	4353	protein_coding	Rho_family_GTPase_2
ENSG00000137699	35.0717412763137	388.188839389494	3.46351917768916	4.0170562061774e-12	6.21836611112398e-11	TRIM29	chr11	-	120111275	120185529	10218	protein_coding	tripartite_motif_containing_29
ENSG00000224165	103.328007124128	3.16919693313913	-4.97507998272681	4.05429976332925e-12	6.26522907839178e-11	DNAJC27-AS1	chr2	+	24971390	25039694	5651	antisense	DNAJC27_antisense_RNA_1
ENSG00000196381	2.83950028546094	104.434588727989	5.13822020650765	4.05429976332925e-12	6.26522907839178e-11	ZNF781	chr19	-	37667751	37692322	3617	protein_coding	zinc_finger_protein_781
ENSG00000204791	2.83950028546094	104.434588727989	5.13822020650765	4.05429976332925e-12	6.26522907839178e-11	SMPD5	chr8	+	144049129	144051522	1818	antisense	sphingomyelin_phosphodiesterase_5
ENSG00000261324	178.220283362535	10.5530773088976	-4.06262775172662	4.1504466988635e-12	6.41013434602251e-11	RP11-174G6.5	chr12	-	14762504	14767931	5428	sense_overlapping	NA
ENSG00000082556	0.943449169558452	82.2827691789892	6.26320969150769	4.38567540689553e-12	6.76181378058003e-11	OPRK1	chr8	-	53225716	53251697	5738	protein_coding	opioid_receptor_kappa_1
ENSG00000275234	81.52392518965	1.05955866386509	-6.11305209837834	4.38567540689553e-12	6.76181378058003e-11	CTD-2396E7.11	chr19	+	6469465	6470152	688	antisense	NA
ENSG00000225465	0.943449169558452	82.2827691789892	6.26320969150769	4.38567540689553e-12	6.76181378058003e-11	RFPL1S	chr22	-	29436534	29478175	6271	antisense	RFPL1_antisense_RNA_1
ENSG00000268883	1.89146593041347	93.8861032664596	5.53973897481416	4.48308802111846e-12	6.90410917061568e-11	PNMA6B	chrX	-	153075769	153076968	1200	unprocessed_pseudogene	paraneoplastic_Ma_antigen_family_member_6B_(pseudogene)
ENSG00000166592	1.89146593041347	93.8861032664596	5.53973897481416	4.48308802111846e-12	6.90410917061568e-11	RRAD	chr16	-	66921679	66925644	1709	protein_coding	Ras-related_associated_with_diabetes
ENSG00000100767	122.288077587259	4.22402546552972	-4.81656738745143	4.5416163642366e-12	6.99025267568517e-11	PAPLN	chr14	+	73237497	73274640	7699	protein_coding	papilin_proteoglycan-like_sulfated_glycoprotein
ENSG00000108443	10224.2126670758	1213.08036853152	-3.0751179579936	4.73479974388635e-12	7.28343467733254e-11	RPS6KB1	chr17	+	59893046	59950564	7687	protein_coding	ribosomal_protein_S6_kinase_70kDa_polypeptide_1
ENSG00000177098	3.7875259485201	113.92822559399	4.86381453055239	4.76623123337074e-12	7.32760498512402e-11	SCN4B	chr11	-	118133377	118152888	5649	protein_coding	sodium_channel_voltage_gated_type_IV_beta_subunit
ENSG00000110195	18.007660057365	239.455199689385	3.72348119121871	4.79748679460863e-12	7.3714546383713e-11	FOLR1	chr11	+	72189558	72196301	1577	protein_coding	folate_receptor_1_(adult)
ENSG00000071242	68.2518745239287	1.38777878078145e-17	-9.09758084481406	4.8418520198423e-12	7.40586395729254e-11	RPS6KA2	chr6	-	166409364	166906451	8243	protein_coding	ribosomal_protein_S6_kinase_90kDa_polypeptide_2
ENSG00000151025	68.2518745239287	1.38777878078145e-17	-9.09758084481406	4.8418520198423e-12	7.40586395729254e-11	GPR158	chr10	+	25175062	25602226	7726	protein_coding	G_protein-coupled_receptor_158
ENSG00000163093	68.2518745239287	1.38777878078145e-17	-9.09758084481406	4.8418520198423e-12	7.40586395729254e-11	BBS5	chr2	+	169479178	169506655	4556	protein_coding	Bardet-Biedl_syndrome_5
ENSG00000104313	1.38777878078145e-17	69.6245864241491	9.1260699994897	4.8418520198423e-12	7.40586395729254e-11	EYA1	chr8	-	71197433	71362232	5170	protein_coding	EYA_transcriptional_coactivator_and_phosphatase_1
ENSG00000154080	1.38777878078145e-17	69.6245864241491	9.1260699994897	4.8418520198423e-12	7.40586395729254e-11	CHST9	chr18	-	26906481	27185317	11522	protein_coding	carbohydrate_(N-acetylgalactosamine_4-0)_sulfotransferase_9
ENSG00000267640	1.38777878078145e-17	69.6245864241491	9.1260699994897	4.8418520198423e-12	7.40586395729254e-11	CTD-2554C21.2	chr19	+	37817359	37826638	1352	lincRNA	NA
ENSG00000234546	68.2518745239287	1.38777878078145e-17	-9.09758084481406	4.8418520198423e-12	7.40586395729254e-11	RP3-510D11.2	chr1	+	9182004	9196284	1662	lincRNA	NA
ENSG00000125872	1.38777878078145e-17	69.6245864241491	9.1260699994897	4.8418520198423e-12	7.40586395729254e-11	LRRN4	chr20	-	6040778	6054049	2692	protein_coding	leucine_rich_repeat_neuronal_4
ENSG00000150403	2898.04213905679	334.391565552221	-3.11501388266664	4.84462472607098e-12	7.40590421560261e-11	TMCO3	chr13	+	113490995	113554590	10407	protein_coding	transmembrane_and_coiled-coil_domains_3
ENSG00000136379	1772.76206415331	200.425804657617	-3.14409867213632	5.08539559665613e-12	7.76956247362206e-11	ABHD17C	chr15	+	80679684	80755621	3627	protein_coding	abhydrolase_domain_containing_17C
ENSG00000236397	20.8516752476805	264.771563966519	3.65825486098516	5.12330284917695e-12	7.82304556233894e-11	DDX11L2	chr2	-	113599036	113601261	1398	unprocessed_pseudogene	DEAD/H_(Asp-Glu-Ala-Asp/His)_box_helicase_11_like_2
ENSG00000135299	35.0717412763137	383.969445365645	3.44775695802551	5.15830213039527e-12	7.87203029135477e-11	ANKRD6	chr6	+	89433170	89633834	8329	protein_coding	ankyrin_repeat_domain_6
ENSG00000140284	542.253606672942	53.801857795042	-3.33036292005983	5.16191063864554e-12	7.87308157702012e-11	SLC27A2	chr15	+	50182196	50236395	2802	protein_coding	solute_carrier_family_27_(fatty_acid_transporter)_member_2
ENSG00000243335	86.263943113753	811.183089297862	3.23125281925523	5.17855775195042e-12	7.89400725489514e-11	KCTD7	chr7	+	66628881	66811187	8506	protein_coding	potassium_channel_tetramerization_domain_containing_7
ENSG00000179954	5.68356074469745	122.36701388597	4.39724390637296	5.25648192479005e-12	7.99922638735262e-11	SSC5D	chr19	+	55488404	55519098	7314	protein_coding	scavenger_receptor_cysteine_rich_family_5_domains
ENSG00000083454	5.68356074469745	122.36701388597	4.39724390637296	5.25648192479005e-12	7.99922638735262e-11	P2RX5	chr17	-	3672199	3696404	4190	protein_coding	purinergic_receptor_P2X_ligand_gated_ion_channel_5
ENSG00000215105	121.340074076251	4.22402546552972	-4.80535162444402	5.25648192479005e-12	7.99922638735262e-11	TTC3P1	chrX	-	75740831	75746911	6081	processed_pseudogene	tetratricopeptide_repeat_domain_3_pseudogene_1
ENSG00000134574	2151.0154339357	246.839139274834	-3.12275889297466	5.33167205810137e-12	8.10907324978914e-11	DDB2	chr11	+	47214465	47239240	4897	protein_coding	damage-specific_DNA_binding_protein_2
ENSG00000227070	80.5759215954935	1.05955866386509	-6.0962042257954	5.39633076543595e-12	8.18893952846065e-11	RP11-191G24.1	chr1	+	51518309	51561629	476	antisense	NA
ENSG00000254100	80.5759215954935	1.05955866386509	-6.0962042257954	5.39633076543595e-12	8.18893952846065e-11	RP11-675F6.4	chr8	-	38552248	38559020	537	lincRNA	NA
ENSG00000196092	80.5759215954935	1.05955866386509	-6.0962042257954	5.39633076543595e-12	8.18893952846065e-11	PAX5	chr9	-	36833275	37034185	9333	protein_coding	paired_box_5
ENSG00000261469	80.5759215954935	1.05955866386509	-6.0962042257954	5.39633076543595e-12	8.18893952846065e-11	RP11-96D1.6	chr16	-	68236845	68237667	533	sense_intronic	NA
ENSG00000125531	4.73554534719345	112.873377055392	4.53770528724952	5.57931840596493e-12	8.46186164990159e-11	C20orf195	chr20	+	63547891	63556708	3625	protein_coding	chromosome_20_open_reading_frame_195
ENSG00000203499	2935.01427293732	341.775505103255	-3.10180267724617	5.60041870723758e-12	8.4890888622467e-11	FAM83H-AS1	chr8	+	143734140	143746337	3229	lincRNA	FAM83H_antisense_RNA_1_(head_to_head)
ENSG00000130962	32.2277288921922	356.543384200433	3.46241702214824	5.62454916041272e-12	8.52087599211738e-11	PRRG1	chrX	+	37349275	37457295	6180	protein_coding	proline_rich_Gla_(G-carboxyglutamic_acid)_1
ENSG00000272070	101.432000044745	3.16919693313913	-4.94839517901461	5.69853211598373e-12	8.61843056868297e-11	AC005618.6	chr5	+	141326210	141329357	3148	lincRNA	NA
ENSG00000055118	101.432000044745	3.16919693313913	-4.94839517901461	5.69853211598373e-12	8.61843056868297e-11	KCNH2	chr7	-	150944961	150978315	5877	protein_coding	potassium_channel_voltage_gated_eag_related_subfamily_H_member_2
ENSG00000141579	101.432000044745	3.16919693313913	-4.94839517901461	5.69853211598373e-12	8.61843056868297e-11	ZNF750	chr17	-	82829435	82840578	3713	protein_coding	zinc_finger_protein_750
ENSG00000233822	148.83217552288	7.38854262067175	-4.31021937722224	5.8116354070715e-12	8.78456055981446e-11	HIST1H2BN	chr6	+	27837760	27865798	5477	protein_coding	histone_cluster_1_H2bn
ENSG00000101000	65.4078635502135	631.858843850022	3.26949395435673	5.88990945711154e-12	8.89558318478834e-11	PROCR	chr20	+	35172073	35216240	1696	protein_coding	protein_C_receptor
ENSG00000173227	1593.58941528463	180.383682816483	-3.14229487165298	5.89168269970777e-12	8.89558318478834e-11	SYT12	chr11	+	67006778	67050863	10830	protein_coding	synaptotagmin_12
ENSG00000269025	1.38777878078145e-17	68.569737855309	9.10408341546007	6.14342514345582e-12	9.26530214868174e-11	CTC-457E21.5	chr19	+	22605739	22608211	607	transcribed_processed_pseudogene	NA
ENSG00000183770	1.38777878078145e-17	68.569737855309	9.10408341546007	6.14342514345582e-12	9.26530214868174e-11	FOXL2	chr3	-	138944224	138947140	2917	protein_coding	forkhead_box_L2
ENSG00000246575	183.908304185625	11.6079237420807	-3.97195162478776	6.15833976411803e-12	9.28260425261078e-11	AC093162.5	chr2	+	85315041	85316529	704	unprocessed_pseudogene	NA
ENSG00000110172	550.785637608149	4639.22830062848	3.07402106376956	6.22793400344393e-12	9.3822608009424e-11	CHORDC1	chr11	-	90201160	90223364	10655	protein_coding	cysteine_and_histidine_rich_domain_containing_1
ENSG00000173210	40.7597653317094	421.943991567382	3.36767892704838	6.25295403419374e-12	9.41469338280672e-11	ABLIM3	chr5	+	149141483	149260542	7225	protein_coding	actin_binding_LIM_protein_family_member_3
ENSG00000165259	1.89146593041347	91.7764061663017	5.50699307618497	6.51983074523116e-12	9.80556362944246e-11	HDX	chrX	-	84317874	84502479	7258	protein_coding	highly_divergent_homeobox
ENSG00000150337	91.0039609679889	2.11437967028788	-5.3499397356408	6.51983074523116e-12	9.80556362944246e-11	FCGR1A	chr1	+	149782671	149792518	2998	protein_coding	Fc_fragment_of_IgG_high_affinity_Ia_receptor_(CD64)
ENSG00000206567	217.088425430395	15.8273130116772	-3.76773439170687	6.53323292401591e-12	9.81764785670808e-11	AC022007.5	chr3	-	10006418	10011209	2533	lincRNA	NA
ENSG00000167711	7.57958445112432	139.244590392279	4.17620710221847	6.53514718637952e-12	9.81764785670808e-11	SERPINF2	chr17	+	1742836	1755268	2348	protein_coding	serpin_peptidase_inhibitor_clade_F_(alpha-2_antiplasmin_pigment_epithelium_derived_factor)_member_2
ENSG00000149596	8.5275940924434	148.738227139384	4.10395476682637	6.56982600806274e-12	9.86424989607015e-11	JPH2	chr20	-	44111695	44187578	5943	protein_coding	junctophilin_2
ENSG00000101265	44.5517809653487	453.589446716282	3.34403659000593	6.63231476461814e-12	9.95253199458501e-11	RASSF2	chr20	-	4780023	4823645	5759	protein_coding	Ras_association_(RalGDS/AF-6)_domain_family_member_2
ENSG00000170006	377.301008239198	34.8145833807673	-3.43347210236129	6.640047501067e-12	9.95859404414753e-11	TMEM154	chr4	-	152618632	152680165	11587	protein_coding	transmembrane_protein_154
ENSG00000197496	1814.47421521002	208.864592785747	-3.11818416627615	6.64684896574179e-12	9.95896537783758e-11	SLC2A10	chr20	+	46709487	46736347	5000	protein_coding	solute_carrier_family_2_(facilitated_glucose_transporter)_member_10
ENSG00000225511	79.6279179979974	1.05955866386509	-6.07915727569597	6.65137456259196e-12	9.95896537783758e-11	LINC00475	chr9	+	92141298	92160114	3858	lincRNA	long_intergenic_non-protein_coding_RNA_475
ENSG00000177335	0.943449169558452	80.1730720619615	6.225792494372	6.65137456259196e-12	9.95896537783758e-11	C8orf31	chr8	+	143039209	143059942	2929	processed_transcript	chromosome_8_open_reading_frame_31
ENSG00000127824	97.6399858638856	890.296726963543	3.18702947478009	6.87659184788426e-12	1.02904648041092e-10	TUBA4A	chr2	-	219249711	219278170	4079	protein_coding	tubulin_alpha_4a
ENSG00000171346	173.480265999404	10.5530773088976	-4.02376632559818	7.00918651145269e-12	1.04830684119708e-10	KRT15	chr17	-	41513743	41522529	7069	protein_coding	keratin_15_type_I
ENSG00000145476	417.117152769254	40.0888262268668	-3.37530667248178	7.17556662707847e-12	1.07259606244899e-10	CYP4V2	chr4	+	186191520	186213456	9807	protein_coding	cytochrome_P450_family_4_subfamily_V_member_2
ENSG00000197168	164.948234719006	9.49823147579758	-4.10119327725999	7.18854180898937e-12	1.07394026826154e-10	NEK5	chr13	-	52033611	52129078	6958	protein_coding	NIMA-related_kinase_5
ENSG00000121905	6.63157350604578	129.750953619133	4.26373379604603	7.33966791005396e-12	1.09591076889543e-10	HPCA	chr1	+	32885994	32898441	1991	protein_coding	hippocalcin
ENSG00000253320	146.936168547508	7.38854262067175	-4.29173863229106	7.43132403441277e-12	1.10898220205852e-10	AZIN1-AS1	chr8	+	102864300	102977876	3695	antisense	AZIN1_antisense_RNA_1
ENSG00000103316	7.57958445112432	138.189741863287	4.16524584809513	7.4458163056841e-12	1.11053032355684e-10	CRYM	chr16	-	21238874	21303083	3782	protein_coding	crystallin_mu
ENSG00000167889	24.6436941098209	284.813685657927	3.52379203813827	7.46750330126625e-12	1.11314922068516e-10	MGAT5B	chr17	+	76868456	76950393	6386	protein_coding	mannosyl_(alpha-16-)-glycoprotein_beta-16-N-acetyl-glucosaminyltransferase_isozyme_B
ENSG00000134138	78.6799143970564	731.014603112635	3.21370322990602	7.51342021347889e-12	1.11937507998161e-10	MEIS2	chr15	-	36889204	37101299	10798	protein_coding	Meis_homeobox_2
ENSG00000177606	346.964898068051	2931.42857722371	3.07826441876125	7.64335602687212e-12	1.13810457548666e-10	JUN	chr1	-	58780788	58784327	3540	protein_coding	jun_proto-oncogene
ENSG00000009307	85393.3008501877	10441.9499053579	-3.031717322739	7.73480493575762e-12	1.15108581621214e-10	CSDE1	chr1	-	114716913	114758676	5778	protein_coding	cold_shock_domain_containing_E1_RNA_binding
ENSG00000076043	227.516463473292	1948.30977404932	3.09745033382494	7.75398033856082e-12	1.15330299950155e-10	REXO2	chr11	+	114439386	114450279	3699	protein_coding	RNA_exonuclease_2
ENSG00000180287	1.38777878078145e-17	67.5148892855227	9.08175656490842	7.81283414982964e-12	1.15568231313388e-10	PLD5	chr1	-	242082986	242524696	9545	protein_coding	phospholipase_D_family_member_5
ENSG00000141469	66.3558672136005	1.38777878078145e-17	-9.05701410060441	7.81283414982964e-12	1.15568231313388e-10	SLC14A1	chr18	+	45724127	45752520	6376	protein_coding	solute_carrier_family_14_(urea_transporter)_member_1_(Kidd_blood_group)
ENSG00000248370	1.38777878078145e-17	67.5148892855227	9.08175656490842	7.81283414982964e-12	1.15568231313388e-10	RP11-366H4.1	chr4	+	188160065	188161139	677	lincRNA	NA
ENSG00000187172	66.3558672136005	1.38777878078145e-17	-9.05701410060441	7.81283414982964e-12	1.15568231313388e-10	BAGE2	chr21	+	10413477	10516431	4080	transcribed_unprocessed_pseudogene	B_melanoma_antigen_family_member_2
ENSG00000226091	1.38777878078145e-17	67.5148892855227	9.08175656490842	7.81283414982964e-12	1.15568231313388e-10	LINC00937	chr12	-	8295986	8396803	5663	lincRNA	long_intergenic_non-protein_coding_RNA_937
ENSG00000161031	66.3558672136005	1.38777878078145e-17	-9.05701410060441	7.81283414982964e-12	1.15568231313388e-10	PGLYRP2	chr19	-	15468645	15498956	3188	protein_coding	peptidoglycan_recognition_protein_2
ENSG00000174460	1.38777878078145e-17	67.5148892855227	9.08175656490842	7.81283414982964e-12	1.15568231313388e-10	ZCCHC12	chrX	+	118823790	118826968	2231	protein_coding	zinc_finger_CCHC_domain_containing_12
ENSG00000170801	1.38777878078145e-17	67.5148892855227	9.08175656490842	7.81283414982964e-12	1.15568231313388e-10	HTRA3	chr4	+	8269765	8307111	3321	protein_coding	HtrA_serine_peptidase_3
ENSG00000018869	1.38777878078145e-17	67.5148892855227	9.08175656490842	7.81283414982964e-12	1.15568231313388e-10	ZNF582	chr19	-	56375846	56393545	3350	protein_coding	zinc_finger_protein_582
ENSG00000259098	1.38777878078145e-17	67.5148892855227	9.08175656490842	7.81283414982964e-12	1.15568231313388e-10	RP11-603B24.2	chr15	+	22258138	22258848	711	processed_pseudogene	NA
ENSG00000014257	90.0559574022609	2.11437967028788	-5.33485364321436	7.8791768086641e-12	1.1642185305339e-10	ACPP	chr3	+	132317367	132368298	4193	protein_coding	acid_phosphatase_prostate
ENSG00000173557	1.89146593041347	90.7215576151637	5.49033712083316	7.8791768086641e-12	1.1642185305339e-10	C2orf70	chr2	+	26562582	26579532	2507	protein_coding	chromosome_2_open_reading_frame_70
ENSG00000181007	50.2398039678286	498.947932405799	3.30862876648765	7.99634574363342e-12	1.18088422411182e-10	ZFP82	chr19	-	36383120	36418656	7506	protein_coding	ZFP82_zinc_finger_protein
ENSG00000079215	2.83950028546094	100.215194550859	5.07879171297318	8.04685166801644e-12	1.1876924032826e-10	SLC1A3	chr5	+	36606355	36688334	6265	protein_coding	solute_carrier_family_1_(glial_high_affinity_glutamate_transporter)_member_3
ENSG00000143702	340.328873960676	2866.02797014843	3.07356423971953	8.1163602099153e-12	1.19729633162241e-10	CEP170	chr1	-	243124428	243255348	10939	protein_coding	centrosomal_protein_170kDa
ENSG00000232533	25.5916986392898	291.142776714039	3.50130863052385	8.16704145198684e-12	1.20411394092005e-10	AC093673.5	chr7	-	143379692	143380495	648	antisense	NA
ENSG00000203865	118.496063536446	4.22402546552972	-4.77117148904511	8.19159364877332e-12	1.20707384881323e-10	ATP1A1-AS1	chr1	-	116392247	116418622	2458	processed_transcript	ATP1A1_antisense_RNA_1
ENSG00000231028	78.6799143970564	1.05955866386509	-6.06190648709529	8.21273009371691e-12	1.20754896241641e-10	LINC00271	chr6	+	135497801	135716055	3825	lincRNA	long_intergenic_non-protein_coding_RNA_271
ENSG00000104044	0.943449169558452	79.1182235021812	6.20671357482552	8.21273009371691e-12	1.20754896241641e-10	OCA2	chr15	-	27754875	28099358	3299	protein_coding	oculocutaneous_albinism_II
ENSG00000142700	0.943449169558452	79.1182235021812	6.20671357482552	8.21273009371691e-12	1.20754896241641e-10	DMRTA2	chr1	-	50417550	50423500	3225	protein_coding	DMRT-like_family_A2
ENSG00000072832	0.943449169558452	79.1182235021812	6.20671357482552	8.21273009371691e-12	1.20754896241641e-10	CRMP1	chr4	-	5748084	5893058	5823	protein_coding	collapsin_response_mediator_protein_1
ENSG00000211445	150.728182495707	1314.3458246873	3.1232198215121	8.27201262544025e-12	1.21560268369276e-10	GPX3	chr5	+	151020438	151028993	3163	protein_coding	glutathione_peroxidase_3
ENSG00000137474	50.2398039678286	497.893083901666	3.30557620698586	8.31249103294479e-12	1.22088580171236e-10	MYO7A	chr11	+	77128264	77215239	10145	protein_coding	myosin_VIIA
ENSG00000198569	180.116290305048	11.6079237420807	-3.94191499071701	8.34486599391746e-12	1.22497363305377e-10	SLC34A3	chr9	+	137230757	137236554	2303	protein_coding	solute_carrier_family_34_(type_II_sodium/phosphate_cotransporter)_member_3
ENSG00000011028	154.520196434071	1341.77188572826	3.11719571835354	8.97707085169295e-12	1.31706035139691e-10	MRC2	chr17	+	62627401	62693597	6860	protein_coding	mannose_receptor_C_type_2
ENSG00000022267	345.068891180527	2885.01524317032	3.06314275290073	9.41044163391743e-12	1.37989107721706e-10	FHL1	chrX	+	136146702	136211359	5997	protein_coding	four_and_a_half_LIM_domains_1
ENSG00000133640	1.89146593041347	89.6667090633033	5.47348662382727	9.53558820174878e-12	1.39748191004542e-10	LRRIQ1	chr12	+	85036314	85263224	7560	protein_coding	leucine-rich_repeats_and_IQ_motif_containing_1
ENSG00000182255	1.38777878078145e-17	66.4600407147879	9.05907875006224	9.95921715802469e-12	1.45167702639618e-10	KCNA4	chr11	-	30009741	30017023	4195	protein_coding	potassium_channel_voltage_gated_shaker_related_subfamily_A_member_4
ENSG00000243811	1.38777878078145e-17	66.4600407147879	9.05907875006224	9.95921715802469e-12	1.45167702639618e-10	APOBEC3D	chr22	+	39014363	39033276	2545	protein_coding	apolipoprotein_B_mRNA_editing_enzyme_catalytic_polypeptide-like_3D
ENSG00000261026	65.4078635502135	1.38777878078145e-17	-9.03629479468223	9.95921715802469e-12	1.45167702639618e-10	CTD-3247F14.2	chr8	-	22679013	22684009	4997	sense_overlapping	NA
ENSG00000197646	1.38777878078145e-17	66.4600407147879	9.05907875006224	9.95921715802469e-12	1.45167702639618e-10	PDCD1LG2	chr9	+	5510570	5571254	2365	protein_coding	programmed_cell_death_1_ligand_2
ENSG00000183036	65.4078635502135	1.38777878078145e-17	-9.03629479468223	9.95921715802469e-12	1.45167702639618e-10	PCP4	chr21	+	39867317	39929397	1106	protein_coding	Purkinje_cell_protein_4
ENSG00000229848	65.4078635502135	1.38777878078145e-17	-9.03629479468223	9.95921715802469e-12	1.45167702639618e-10	RP13-766D20.2	chr17	+	81514047	81527776	957	antisense	NA
ENSG00000234261	65.4078635502135	1.38777878078145e-17	-9.03629479468223	9.95921715802469e-12	1.45167702639618e-10	RP11-146I2.1	chr6	-	14661829	15090003	1735	lincRNA	NA
ENSG00000174482	1.38777878078145e-17	66.4600407147879	9.05907875006224	9.95921715802469e-12	1.45167702639618e-10	LINGO2	chr9	-	27948078	28670286	3480	protein_coding	leucine_rich_repeat_and_Ig_domain_containing_2
ENSG00000081818	65.4078635502135	1.38777878078145e-17	-9.03629479468223	9.95921715802469e-12	1.45167702639618e-10	PCDHB4	chr5	+	141121799	141125623	3825	protein_coding	protocadherin_beta_4
ENSG00000173467	65.4078635502135	1.38777878078145e-17	-9.03629479468223	9.95921715802469e-12	1.45167702639618e-10	AGR3	chr7	-	16859405	16881987	1160	protein_coding	anterior_gradient_3_protein_disulphide_isomerase_family_member
ENSG00000187837	807.694568700897	88.6118605107078	-3.1865126013451	1.00870641359526e-11	1.46951794430091e-10	HIST1H1C	chr6	-	26055787	26056428	642	protein_coding	histone_cluster_1_H1c
ENSG00000183111	236.996498037273	18.9918569258258	-3.63309407456921	1.01405830217035e-11	1.47651707215581e-10	ARHGEF37	chr5	+	149551947	149634968	5324	protein_coding	Rho_guanine_nucleotide_exchange_factor_37
ENSG00000255974	77.7319107925596	1.05955866386509	-6.04444692614946	1.01587399607864e-11	1.47836255684062e-10	CYP2A6	chr19	-	40843538	40882210	2316	protein_coding	cytochrome_P450_family_2_subfamily_A_member_6
ENSG00000104888	14.215637608667	196.206410590334	3.77464882153583	1.02152927949593e-11	1.48579064460017e-10	SLC17A7	chr19	-	49429401	49442360	6013	protein_coding	solute_carrier_family_17_(vesicular_glutamate_transporter)_member_7
ENSG00000188112	1952.88271643776	231.01641158649	-3.07888283100743	1.02231770662755e-11	1.48613581007648e-10	C6orf132	chr6	-	42101118	42142619	6852	protein_coding	chromosome_6_open_reading_frame_132
ENSG00000188130	138.404137124273	1203.5867320165	3.11917926294897	1.02299700941095e-11	1.48632205580688e-10	MAPK12	chr22	-	50245450	50261825	9424	protein_coding	mitogen-activated_protein_kinase_12
ENSG00000118276	121.340074076251	1065.40157828821	3.13289693971719	1.0384927611838e-11	1.50802346785581e-10	B4GALT6	chr18	-	31622247	31685836	5306	protein_coding	UDP-Gal:betaGlcNAc_beta_14-_galactosyltransferase_polypeptide_6
ENSG00000113209	17.0596547238187	221.522774963406	3.68869007882239	1.04043841171321e-11	1.51003564102575e-10	PCDHB5	chr5	+	141135218	141138625	3408	protein_coding	protocadherin_beta_5
ENSG00000168062	4.73554534719345	108.653982895952	4.48280071871302	1.05810918076114e-11	1.53485595311484e-10	BATF2	chr11	-	64987943	64997045	2844	protein_coding	basic_leucine_zipper_transcription_factor_ATF-like_2
ENSG00000164430	166.844241673367	1426.15976585146	3.09456680659156	1.06377599953988e-11	1.54224643030066e-10	MB21D1	chr6	-	73413515	73452276	4155	protein_coding	Mab-21_domain_containing_1
ENSG00000166262	169.688252101451	10.5530773088976	-3.99190544363806	1.07433065066612e-11	1.55671146296951e-10	FAM227B	chr15	-	49326962	49620931	6020	protein_coding	family_with_sequence_similarity_227_member_B
ENSG00000111885	3646.01684753716	443.04096166835	-3.04046888528802	1.1059958917953e-11	1.60173390000816e-10	MAN1A1	chr6	-	119177209	119349761	5014	protein_coding	mannosidase_alpha_class_1A_member_1
ENSG00000166682	6.63157350604578	126.586408021581	4.22814455103419	1.11754440889489e-11	1.61759004456574e-10	TMPRSS5	chr11	-	113687550	113706373	2662	protein_coding	transmembrane_protease_serine_5
ENSG00000168398	219.932435808241	16.8821608614159	-3.6940973981807	1.1321234479239e-11	1.63781335282811e-10	BDKRB2	chr14	+	96204679	96244166	6845	protein_coding	bradykinin_receptor_B2
ENSG00000168913	1.89146593041347	88.6118605107078	5.45643698691147	1.15570125498786e-11	1.6710262757106e-10	ENHO	chr9	-	34521040	34523041	1082	protein_coding	energy_homeostasis_associated
ENSG00000090339	205.712383898306	1732.06583127078	3.07298765452338	1.17536338421296e-11	1.69854496348803e-10	ICAM1	chr19	+	10270835	10286615	3706	protein_coding	intercellular_adhesion_molecule_1
ENSG00000247516	9.47560276457628	152.957621241804	3.99435774236125	1.17655330939491e-11	1.69935385865791e-10	MIR4458HG	chr5	+	8450743	8463095	4339	lincRNA	MIR4458_host_gene
ENSG00000164291	91.9519645312981	825.950968329937	3.16528829721254	1.19567852881206e-11	1.72605284839112e-10	ARSK	chr5	+	95555074	95605064	4314	protein_coding	arylsulfatase_family_member_K
ENSG00000080503	2655.35326024677	320.678534952684	-3.04923348868651	1.20565435770145e-11	1.73952249383506e-10	SMARCA2	chr9	+	2015219	2193624	9769	protein_coding	SWI/SNF_related_matrix_associated_actin_dependent_regulator_of_chromatin_subfamily_a_member_2
ENSG00000080031	32.2277288921922	342.830353610408	3.40585368971144	1.20940286751755e-11	1.74399773933038e-10	PTPRH	chr19	-	55181248	55209506	4344	protein_coding	protein_tyrosine_phosphatase_receptor_type_H
ENSG00000152767	3595.77266560007	438.821567648718	-3.03425207664763	1.22576393031106e-11	1.76664618625164e-10	FARP1	chr13	+	98142562	98455176	32419	protein_coding	FERM_ARH/RhoGEF_and_pleckstrin_domain_protein_1
ENSG00000227827	10.4236106947186	160.34156091118	3.9265239142259	1.26093236874379e-11	1.8163622999757e-10	RP11-958N24.2	chr16	+	16356224	16377507	9932	unprocessed_pseudogene	NA
ENSG00000230524	64.4598598810663	1.38777878078145e-17	-9.01527358682	1.27256663685870e-11	1.82726474598146e-10	COL6A4P1	chr3	-	15151833	15205959	4566	unitary_pseudogene	collagen_type_VI_alpha_4_pseudogene_1
ENSG00000251003	1.38777878078145e-17	65.4051921431048	9.03603876058376	1.27256663685870e-11	1.82726474598146e-10	ZFPM2-AS1	chr8	-	105780246	106060524	2213	processed_transcript	ZFPM2_antisense_RNA_1
ENSG00000241111	64.4598598810663	1.38777878078145e-17	-9.01527358682	1.27256663685870e-11	1.82726474598146e-10	PRICKLE2-AS1	chr3	+	64067964	64103131	6505	antisense	PRICKLE2_antisense_RNA_1
ENSG00000148942	64.4598598810663	1.38777878078145e-17	-9.01527358682	1.27256663685870e-11	1.82726474598146e-10	SLC5A12	chr11	-	26667019	26723427	7544	protein_coding	solute_carrier_family_5_(sodium/monocarboxylate_cotransporter)_member_12
ENSG00000182397	1.38777878078145e-17	65.4051921431048	9.03603876058376	1.27256663685870e-11	1.82726474598146e-10	DNM1P46	chr15	-	99790156	99806927	3979	transcribed_unprocessed_pseudogene	dynamin_1_pseudogene_46
ENSG00000257056	1.38777878078145e-17	65.4051921431048	9.03603876058376	1.27256663685870e-11	1.82726474598146e-10	RP11-966I7.2	chr14	-	28783491	28785787	1655	lincRNA	NA
ENSG00000167600	5.68356074469745	116.037922669736	4.32070281497459	1.28664768715748e-11	1.8465003476258e-10	CYP2S1	chr19	+	41193049	41207539	2874	protein_coding	cytochrome_P450_family_2_subfamily_S_member_1
ENSG00000214425	6.63157350604578	125.531559488286	4.2160836618472	1.28766369125404e-11	1.84697548395512e-10	LRRC37A4P	chr17	-	45506741	45550335	6491	transcribed_unprocessed_pseudogene	leucine-rich_repeat_containing_37_member_A4_pseudogene
ENSG00000136936	364.028960045755	34.8145833807673	-3.38182737749193	1.29548328931806e-11	1.85720374161355e-10	XPA	chr9	-	97674909	97697357	1833	protein_coding	xeroderma_pigmentosum_complementation_group_A
ENSG00000148700	149.780179009606	1276.37127862977	3.09002152863202	1.29931524174333e-11	1.86170748187304e-10	ADD3	chr10	+	109996368	110135565	6541	protein_coding	adducin_3
ENSG00000275074	620.937891922325	66.4600407147879	-3.22158228637456	1.32955190353475e-11	1.90402000163134e-10	NUDT18	chr8	-	22106872	22109419	1756	protein_coding	nudix_hydrolase_18
ENSG00000164949	32.2277288921922	340.720656596069	3.39695138782021	1.35171395807061e-11	1.93473028627029e-10	GEM	chr8	-	94249253	94262350	2648	protein_coding	GTP_binding_protein_overexpressed_in_skeletal_muscle
ENSG00000070404	188.648321528437	1581.22249556856	3.06639131032327	1.39423458226587e-11	1.9945320819831e-10	FSTL3	chr19	+	676365	683399	3067	protein_coding	follistatin-like_3_(secreted_glycoprotein)
ENSG00000228526	200.02436311868	14.7724653244214	-3.74842983947317	1.39773367033863e-11	1.99847752674186e-10	MIR34AHG	chr1	-	9148011	9196983	4571	lincRNA	MIR34A_host_gene
ENSG00000243742	86.263943113753	2.11437967028788	-5.27288044305526	1.40276423087042e-11	2.00354556407053e-10	RPLP0P2	chr11	+	61615036	61639449	3909	transcribed_processed_pseudogene	ribosomal_protein_large_P0_pseudogene_2
ENSG00000163283	1.89146593041347	87.5570119573647	5.43918344684921	1.40276423087042e-11	2.00354556407053e-10	ALPP	chr2	+	232378534	232382889	3059	protein_coding	alkaline_phosphatase_placental
ENSG00000110880	1503.52908912526	11967.26083798	2.99255883790083	1.42398662121649e-11	2.03278047791021e-10	CORO1C	chr12	-	108645109	108731596	6532	protein_coding	coronin_actin_binding_protein_1C
ENSG00000171291	4.73554534719345	106.544285813075	4.45454445688373	1.46614186659576e-11	2.09185087696409e-10	ZNF439	chr19	+	11848726	11883750	5207	protein_coding	zinc_finger_protein_439
ENSG00000157927	52.1358115381801	498.947932405799	3.25531952125555	1.49337489942994e-11	2.12957945732564e-10	RADIL	chr7	-	4797055	4883719	6516	protein_coding	Ras_association_and_DIL_domains
ENSG00000263968	75.8359035724339	1.05955866386509	-6.00888083620141	1.56288090990843e-11	2.22516613603964e-10	RN7SL381P	chr16	+	85659378	85659675	298	misc_RNA	RNA_7SL_cytoplasmic_381_pseudogene
ENSG00000130173	75.8359035724339	1.05955866386509	-6.00888083620141	1.56288090990843e-11	2.22516613603964e-10	ANGPTL8	chr19	+	11237450	11241943	1223	protein_coding	angiopoietin_like_8
ENSG00000163873	75.8359035724339	1.05955866386509	-6.00888083620141	1.56288090990843e-11	2.22516613603964e-10	GRIK3	chr1	-	36795527	37034129	10111	protein_coding	glutamate_receptor_ionotropic_kainate_3
ENSG00000110076	2.83950028546094	95.9958003638751	5.016809634143	1.62787149886089e-11	2.31100771509978e-10	NRXN2	chr11	-	64606174	64723188	10580	protein_coding	neurexin_2
ENSG00000006377	1.38777878078145e-17	64.3503435704753	9.01262484029282	1.63002917530215e-11	2.31100771509978e-10	DLX6	chr7	+	97005548	97011039	3449	protein_coding	distal-less_homeobox_6
ENSG00000134548	1.38777878078145e-17	64.3503435704753	9.01262484029282	1.63002917530215e-11	2.31100771509978e-10	SPX	chr12	+	21526307	21537377	3359	protein_coding	spexin_hormone
ENSG00000162711	1.38777878078145e-17	64.3503435704753	9.01262484029282	1.63002917530215e-11	2.31100771509978e-10	NLRP3	chr1	+	247416156	247449108	4757	protein_coding	NLR_family_pyrin_domain_containing_3
ENSG00000233384	1.38777878078145e-17	64.3503435704753	9.01262484029282	1.63002917530215e-11	2.31100771509978e-10	RP11-100E13.1	chr1	-	224611404	224616220	684	bidirectional_promoter_lncrna	NA
ENSG00000227742	63.5118562059372	1.38777878078145e-17	-8.9939415487091	1.63002917530215e-11	2.31100771509978e-10	CALR4P	chr1	-	51561866	51594897	946	unitary_pseudogene	calreticulin_4_pseudogene
ENSG00000172318	1.38777878078145e-17	64.3503435704753	9.01262484029282	1.63002917530215e-11	2.31100771509978e-10	B3GALT1	chr2	+	167868948	167874041	5094	protein_coding	Beta-13-galactosyltransferase_1
ENSG00000103460	63.5118562059372	1.38777878078145e-17	-8.9939415487091	1.63002917530215e-11	2.31100771509978e-10	TOX3	chr16	-	52438005	52547802	5031	protein_coding	TOX_high_mobility_group_box_family_member_3
ENSG00000139973	7.57958445112432	132.915499213323	4.1091544359436	1.65222301385742e-11	2.34124255342508e-10	SYT16	chr14	+	61995823	62112550	14067	protein_coding	synaptotagmin_16
ENSG00000171097	39.8117613778941	392.40823341296	3.29685613824394	1.66871362013414e-11	2.36336825002821e-10	CCBL1	chr9	-	128832942	128882494	3624	protein_coding	cysteine_conjugate-beta_lyase_cytoplasmic
ENSG00000163412	579.22574071695	62.2406464223989	-3.21573415588654	1.7893659753868e-11	2.53291563739005e-10	EIF4E3	chr3	-	71675416	71754773	10779	protein_coding	eukaryotic_translation_initiation_factor_4E_family_member_3
ENSG00000159958	14.215637608667	190.932168002983	3.73536123561289	1.81110603677665e-11	2.56234445895694e-10	TNFRSF13C	chr22	-	41922023	41926818	3944	protein_coding	tumor_necrosis_factor_receptor_superfamily_member_13C
ENSG00000138759	148.83217552288	1246.8355205843	3.06540020647382	1.82648677198563e-11	2.58274998916436e-10	FRAS1	chr4	+	78057570	78544269	20379	protein_coding	Fraser_extracellular_matrix_complex_subunit_1
ENSG00000144354	135.560126636365	1141.35067041608	3.07251507983604	1.92735317080095e-11	2.72395207567182e-10	CDCA7	chr2	+	173354820	173368997	3934	protein_coding	cell_division_cycle_associated_7
ENSG00000197915	0.943449169558452	75.9536778176314	6.14791457578694	1.94395848616447e-11	2.74598137967056e-10	HRNR	chr1	-	152212082	152224193	9623	protein_coding	hornerin
ENSG00000101493	1248.51616553588	148.738227139384	-3.06835063388804	1.96840993363518e-11	2.7790650403354e-10	ZNF516	chr18	-	76358190	76495190	8217	protein_coding	zinc_finger_protein_516
ENSG00000162551	3.7875259485201	104.434588727989	4.73842718484816	2.04015018765281e-11	2.87884301204844e-10	ALPL	chr1	+	21509372	21578412	3007	protein_coding	alkaline_phosphatase_liver/bone/kidney
ENSG00000237161	1.89146593041347	85.4473148483846	5.40404473101755	2.07598940173129e-11	2.92788337903169e-10	RP11-32B5.1	chr15	-	21293653	21295201	1549	processed_pseudogene	NA
ENSG00000255438	62.5638525245926	1.38777878078145e-17	-8.97228935002646	2.09310564555844e-11	2.94739879050282e-10	CTD-2653D5.1	chr20	+	47677901	47686297	2437	antisense	NA
ENSG00000112232	1.38777878078145e-17	63.295494996904	8.98882465114462	2.09310564555844e-11	2.94739879050282e-10	KHDRBS2	chr6	-	61679960	62286227	2332	protein_coding	KH_domain_containing_RNA_binding_signal_transduction_associated_2
ENSG00000107165	62.5638525245926	1.38777878078145e-17	-8.97228935002646	2.09310564555844e-11	2.94739879050282e-10	TYRP1	chr9	+	12685439	12710290	3741	protein_coding	tyrosinase-related_protein_1
ENSG00000075142	202.868373509699	1652.95219366568	3.02561566488604	2.22312239914795e-11	3.12884752690102e-10	SRI	chr7	-	88205118	88226993	4237	protein_coding	sorcin
ENSG00000178821	10.4236106947186	155.067318291437	3.87830691727314	2.23980654039418e-11	3.15068456798484e-10	TMEM52	chr1	-	1917590	1919273	1594	protein_coding	transmembrane_protein_52
ENSG00000183971	31.2797246983149	323.843080476231	3.36658349643051	2.26082940444141e-11	3.17859883838201e-10	NPW	chr16	+	2009926	2020755	1193	protein_coding	neuropeptide_W
ENSG00000100473	109.016028322243	930.380970042343	3.09175910449778	2.26516887018696e-11	3.1830403206598e-10	COCH	chr14	+	30874514	30895065	3621	protein_coding	cochlin
ENSG00000196876	119.444067050869	1007.38491068584	3.07482056302203	2.28783966629503e-11	3.21322314798499e-10	SCN8A	chr12	+	51590266	51812864	12481	protein_coding	sodium_channel_voltage_gated_type_VIII_alpha_subunit
ENSG00000138622	11.3716180425464	163.506106480198	3.8305909520416	2.30849562695677e-11	3.24054622990715e-10	HCN4	chr15	-	73319859	73369264	7228	protein_coding	hyperpolarization_activated_cyclic_nucleotide_gated_potassium_channel_4
ENSG00000116852	26.539703107702	283.758837148385	3.41204527366004	2.34848385861451e-11	3.29496439809567e-10	KIF21B	chr1	-	200969390	201023700	12150	protein_coding	kinesin_family_member_21B
ENSG00000145860	699.622177097186	5483.10710154693	2.97011100680868	2.37692443686131e-11	3.3331328322622e-10	RNF145	chr5	-	159157409	159210053	4614	protein_coding	ring_finger_protein_145
ENSG00000131779	857.938750738667	99.1603460050651	-3.11150839752409	2.3801037595214e-11	3.33585644382817e-10	PEX11B	chr1	-	145911350	145918837	1838	protein_coding	peroxisomal_biogenesis_factor_11_beta
ENSG00000119669	3026.97060592153	380.8048998475	-2.99035685601969	2.38237794025396e-11	3.33730927464355e-10	IRF2BPL	chr14	-	77024543	77028699	4157	protein_coding	interferon_regulatory_factor_2_binding_protein-like
ENSG00000133863	3.7875259485201	103.379740184592	4.72379798378563	2.41051648552996e-11	3.37147238323656e-10	TEX15	chr8	-	30831544	30890606	11663	protein_coding	testis_expressed_15
ENSG00000172350	3.7875259485201	103.379740184592	4.72379798378563	2.41051648552996e-11	3.37147238323656e-10	ABCG4	chr11	+	119149012	119162653	6271	protein_coding	ATP_binding_cassette_subfamily_G_member_4
ENSG00000151715	102.380003585319	4.22402546552972	-4.56051364044053	2.41051648552996e-11	3.37147238323656e-10	TMEM45B	chr11	+	129815819	129860003	3027	protein_coding	transmembrane_protein_45B
ENSG00000151468	0.943449169558452	74.8988292543413	6.12777003392449	2.4225846285913e-11	3.38659497639155e-10	CCDC3	chr10	-	12896625	13099652	3683	protein_coding	coiled-coil_domain_containing_3
ENSG00000169607	184.856307654874	1505.27340346357	3.02465674678851	2.44758134882425e-11	3.4197657332847e-10	CKAP2L	chr2	-	112736607	112764677	5219	protein_coding	cytoskeleton_associated_protein_2_like
ENSG00000104290	684.454122128337	78.0633749415403	-3.13028797444532	2.56660969165846e-11	3.58421527422382e-10	FZD3	chr8	+	28494205	28574268	13787	protein_coding	frizzled_class_receptor_3
ENSG00000173805	11.3716180425464	162.451257957419	3.82126023391773	2.57989809848599e-11	3.60090745982264e-10	HAP1	chr17	-	41717742	41734644	6223	protein_coding	huntingtin-associated_protein_1
ENSG00000142197	2214.53166394435	276.374897579996	-3.00175980590896	2.6042027187251e-11	3.63295036281123e-10	DOPEY2	chr21	+	36156782	36294274	9030	protein_coding	dopey_family_member_2
ENSG00000114737	233.204484213867	20.0467050958546	-3.53233012795507	2.63574882346326e-11	3.67505702034696e-10	CISH	chr3	-	50606490	50611831	5112	protein_coding	cytokine_inducible_SH2-containing_protein
ENSG00000167705	31.2797246983149	320.678534952684	3.35242165001022	2.69367922774914e-11	3.7493214511171e-10	RILP	chr17	-	1646145	1650077	2103	protein_coding	Rab_interacting_lysosomal_protein
ENSG00000236137	61.615848836786	1.38777878078145e-17	-8.95030723393103	2.69457278508675e-11	3.7493214511171e-10	RP11-27K13.3	chr1	-	117025482	117059490	1946	antisense	NA
ENSG00000005102	1.38777878078145e-17	62.2406464223989	8.96462523418598	2.69457278508675e-11	3.7493214511171e-10	MEOX1	chr17	-	43640388	43661954	2707	protein_coding	mesenchyme_homeobox_1
ENSG00000235277	61.615848836786	1.38777878078145e-17	-8.95030723393103	2.69457278508675e-11	3.7493214511171e-10	AF127577.8	chr21	+	14918534	14947096	781	antisense	NA
ENSG00000228146	127.976098631169	6.33370047263656	-4.31101205653857	2.85089874715738e-11	3.96479296626333e-10	CASP16P	chr16	+	3144219	3149963	3436	transcribed_unprocessed_pseudogene	caspase_16_pseudogene
ENSG00000140961	557.421661668016	61.1857978469708	-3.18500235612059	2.88511163457052e-11	4.01030517205303e-10	OSGIN1	chr16	+	83948282	83966332	3460	protein_coding	oxidative_stress_induced_growth_inhibitor_1
ENSG00000122707	65.4078635502135	580.171267192901	3.14639495588054	2.98603871245223e-11	4.14845543122035e-10	RECK	chr9	+	36036433	36124451	6045	protein_coding	reversion-inducing-cysteine-rich_protein_with_kazal_motifs
ENSG00000111728	0.943449169558452	73.8439806901469	6.10734022320975	3.02493725681559e-11	4.20033254723425e-10	ST8SIA1	chr12	-	22063773	22437041	14483	protein_coding	ST8_alpha-N-acetyl-neuraminide_alpha-28-sialyltransferase_1
ENSG00000156804	425.649183731544	44.3082205480991	-3.26054662913736	3.03641890370793e-11	4.21410561798189e-10	FBXO32	chr8	-	123497889	123541206	7395	protein_coding	F-box_protein_32
ENSG00000133943	30.3317204673078	310.130049871523	3.34840053641401	3.0747982579489e-11	4.26517540246143e-10	C14orf159	chr14	+	91060333	91225632	7212	protein_coding	chromosome_14_open_reading_frame_159
ENSG00000137968	1.89146593041347	83.3376177362614	5.36802875474858	3.09135977895851e-11	4.28594384572726e-10	SLC44A5	chr1	-	75202131	75611116	6299	protein_coding	solute_carrier_family_44_member_5
ENSG00000107821	1996.49087435716	251.058533321874	-2.99077341117959	3.10355688222282e-11	4.30064310822306e-10	KAZALD1	chr10	+	101061841	101068131	3613	protein_coding	Kazal-type_serine_peptidase_inhibitor_domain_1
ENSG00000099282	3740.81719081428	481.015507833854	-2.95888741144097	3.22546729725132e-11	4.46728048986539e-10	TSPAN15	chr10	+	69451473	69507669	2646	protein_coding	tetraspanin_15
ENSG00000143514	489.165414155819	3801.67859070542	2.95790694474229	3.2385207922001e-11	4.4830570678885e-10	TP53BP2	chr1	-	223779899	223845972	5991	protein_coding	tumor_protein_p53_binding_protein_2
ENSG00000059915	109.964031849833	4.22402546552972	-4.66348597511779	3.25373088253024e-11	4.50180128159622e-10	PSD	chr10	-	102402617	102421539	6338	protein_coding	pleckstrin_and_Sec7_domain_containing
ENSG00000103187	798.214534352672	6145.55196026284	2.94448890422756	3.27456165640248e-11	4.52829895520766e-10	COTL1	chr16	-	84565594	84618077	6762	protein_coding	coactosin-like_F-actin_binding_protein_1
ENSG00000157600	2104.56326571967	265.826412477156	-2.98440069023392	3.28645183930981e-11	4.54241211167752e-10	TMEM164	chrX	+	110002631	110182734	6583	protein_coding	transmembrane_protein_164
ENSG00000157150	2.83950028546094	92.8312547167295	4.96851048286203	3.36017400727623e-11	4.63480574323329e-10	TIMP4	chr3	-	12153051	12159351	1650	protein_coding	TIMP_metallopeptidase_inhibitor_4
ENSG00000253570	2.83950028546094	92.8312547167295	4.96851048286203	3.36017400727623e-11	4.63480574323329e-10	RNF5P1	chr8	-	38600661	38601200	540	processed_pseudogene	ring_finger_protein_5_E3_ubiquitin_protein_ligase_pseudogene_1
ENSG00000163793	2.83950028546094	92.8312547167295	4.96851048286203	3.36017400727623e-11	4.63480574323329e-10	DNAJC5G	chr2	+	27275421	27281499	2350	protein_coding	DnaJ_heat_shock_protein_family_(Hsp40)_member_C5_gamma
ENSG00000136274	2.83950028546094	92.8312547167295	4.96851048286203	3.36017400727623e-11	4.63480574323329e-10	NACAD	chr7	-	45080438	45088914	4917	protein_coding	NAC_alpha_domain_containing
ENSG00000115758	717.634242370208	5522.13649608921	2.94367765333678	3.36775319087665e-11	4.64288509944682e-10	ODC1	chr2	-	10439968	10448504	2968	protein_coding	ornithine_decarboxylase_1
ENSG00000102981	100.483996502362	4.22402546552972	-4.53357973814617	3.37633933309157e-11	4.64996764331702e-10	PARD6A	chr16	+	67660946	67662778	1488	protein_coding	par-6_family_cell_polarity_regulator_alpha
ENSG00000185482	100.483996502362	4.22402546552972	-4.53357973814617	3.37633933309157e-11	4.64996764331702e-10	STAC3	chr12	-	57243453	57251193	2096	protein_coding	SH3_and_cysteine_rich_domain_3
ENSG00000198853	122.288077587259	1009.49460768965	3.04392607334188	3.41597681427623e-11	4.70215573117779e-10	RUSC2	chr9	+	35490127	35561898	5682	protein_coding	RUN_and_SH3_domain_containing_2
ENSG00000113389	51.1878077584069	469.41217428529	3.19371578453189	3.44245211881508e-11	4.73618182836569e-10	NPR3	chr5	+	32689070	32791724	9866	protein_coding	natriuretic_peptide_receptor_3
ENSG00000166426	60.6678451422579	1.38777878078145e-17	-8.92798499066435	3.4778788272631e-11	4.77274709699627e-10	CRABP1	chr15	+	78340324	78348230	993	protein_coding	cellular_retinoic_acid_binding_protein_1
ENSG00000154133	1.38777878078145e-17	61.1857978469708	8.94001296718081	3.4778788272631e-11	4.77274709699627e-10	ROBO4	chr11	-	124883691	124898500	7033	protein_coding	roundabout_guidance_receptor_4
ENSG00000168970	60.6678451422579	1.38777878078145e-17	-8.92798499066435	3.4778788272631e-11	4.77274709699627e-10	JMJD7-PLA2G4B	chr15	+	41828095	41848155	7862	protein_coding	JMJD7-PLA2G4B_readthrough
ENSG00000145861	1.38777878078145e-17	61.1857978469708	8.94001296718081	3.4778788272631e-11	4.77274709699627e-10	C1QTNF2	chr5	-	160347751	160370641	2414	protein_coding	C1q_and_tumor_necrosis_factor_related_protein_2
ENSG00000272189	60.6678451422579	1.38777878078145e-17	-8.92798499066435	3.4778788272631e-11	4.77274709699627e-10	RP3-325F22.5	chr6	+	136550661	136552554	1894	antisense	NA
ENSG00000144857	117.548060020835	5.2788609071888	-4.44598214314349	3.55138207894596e-11	4.87113779963666e-10	BOC	chr3	+	113211003	113287459	10330	protein_coding	BOC_cell_adhesion_associated_oncogene_regulated
ENSG00000164823	1891.26249328947	238.400351176838	-2.98726247326937	3.5637746445364e-11	4.88565058792927e-10	OSGIN2	chr8	+	89901859	89927888	4681	protein_coding	oxidative_stress_induced_growth_inhibitor_family_member_2
ENSG00000006747	40.7597653317094	385.024293871644	3.23561630355683	3.60172930786378e-11	4.93517441645603e-10	SCIN	chr7	+	12570577	12660179	11623	protein_coding	scinderin
ENSG00000092853	207.60839082275	1648.73279966002	2.98862872267629	3.64682866065939e-11	4.99443279143429e-10	CLSPN	chr1	-	35720218	35769967	5411	protein_coding	claspin
ENSG00000184867	148.83217552288	1202.53188351483	3.01320931592008	3.65557921915345e-11	5.00387559511127e-10	ARMCX2	chrX	-	101655281	101659891	3589	protein_coding	armadillo_repeat_containing_X-linked_2
ENSG00000151692	79.6279179979974	679.327026481221	3.09067651754309	3.76093348093124e-11	5.14547601455058e-10	RNF144A	chr2	+	6917392	7068286	6473	protein_coding	ring_finger_protein_144A
ENSG00000267530	1.89146593041347	82.2827691789892	5.34967788846234	3.78132913634315e-11	5.16813590930712e-10	AC006273.5	chr19	+	782755	785080	870	lincRNA	NA
ENSG00000247498	81.52392518965	2.11437967028788	-5.1914717400247	3.78132913634315e-11	5.16813590930712e-10	RP11-392P7.6	chr12	+	12927726	12984645	3416	antisense	NA
ENSG00000269843	72.0438890840894	1.05955866386509	-5.93500501586747	3.7845494037488e-11	5.16991688052128e-10	CTC-490E21.10	chr19	-	40831221	40837210	482	lincRNA	NA
ENSG00000139597	236.048494581686	21.1015533357814	-3.47625421730458	3.84828407954724e-11	5.25432042982638e-10	N4BP2L1	chr13	-	32400723	32428311	6053	protein_coding	NEDD4_binding_protein_2-like_1
ENSG00000054983	977.387183464404	7402.93137361403	2.92092733019393	3.94243790125219e-11	5.38015083224528e-10	GALC	chr14	-	87837820	87993665	6825	protein_coding	galactosylceramidase
ENSG00000120708	200.02436311868	1588.60643507865	2.98869185240304	3.9744661571941e-11	5.42111554855316e-10	TGFBI	chr5	+	136028895	136063818	7810	protein_coding	transforming_growth_factor_beta_induced
ENSG00000120327	251.216549851405	22.1564016332808	-3.49606960350877	3.98319679234413e-11	5.4302772852554e-10	PCDHB14	chr5	+	141222932	141227759	4828	protein_coding	protocadherin_beta_14
ENSG00000154065	3.7875259485201	100.215194550859	4.67899869131368	4.0026401216518e-11	5.45402695909361e-10	ANKRD29	chr18	-	23598926	23662885	6391	protein_coding	ankyrin_repeat_domain_29
ENSG00000197261	781.150472524571	92.8312547167295	-3.07128913945647	4.03343316652863e-11	5.49321003881873e-10	C6orf141	chr6	+	49550646	49561907	2940	protein_coding	chromosome_6_open_reading_frame_141
ENSG00000164171	945.155066702287	114.983074132102	-3.0378189048614	4.16766123637973e-11	5.67315259466006e-10	ITGA2	chr5	+	52989326	53094779	7910	protein_coding	integrin_subunit_alpha_2
ENSG00000155792	891.118870945812	107.599134354785	-3.04854932737637	4.29503123566896e-11	5.84358286079965e-10	DEPTOR	chr8	+	119873717	120050913	2622	protein_coding	DEP_domain_containing_MTOR-interacting_protein
ENSG00000158458	5.68356074469745	108.653982895952	4.22594898503928	4.46694660709122e-11	6.07441665188209e-10	NRG2	chr5	-	139846779	140043299	4520	protein_coding	neuregulin_2
ENSG00000196611	1.38777878078145e-17	60.1309492706348	8.91497351855781	4.50078436469345e-11	6.10811027570829e-10	MMP1	chr11	-	102789920	102798160	1970	protein_coding	matrix_metallopeptidase_1
ENSG00000170162	1.38777878078145e-17	60.1309492706348	8.91497351855781	4.50078436469345e-11	6.10811027570829e-10	VGLL2	chr6	+	117265558	117273565	2231	protein_coding	vestigial_like_family_member_2
ENSG00000261804	59.7198414407344	1.38777878078145e-17	-8.90531192907653	4.50078436469345e-11	6.10811027570829e-10	RP11-44F14.2	chr16	+	53373493	53384745	1106	lincRNA	NA
ENSG00000142973	59.7198414407344	1.38777878078145e-17	-8.90531192907653	4.50078436469345e-11	6.10811027570829e-10	CYP4B1	chr1	+	46757838	46819413	3460	protein_coding	cytochrome_P450_family_4_subfamily_B_member_1
ENSG00000116039	140.3001441123	8.44338646668029	-4.03548138038885	4.51942812794669e-11	6.13032690634861e-10	ATP6V1B1	chr2	+	70935882	70965406	2653	protein_coding	ATPase_H+_transporting_lysosomal_56/58kDa_V1_subunit_B1
ENSG00000236830	156.416203399772	10.5530773088976	-3.87450185398642	4.53051575204802e-11	6.1422769114996e-10	CBR3-AS1	chr21	-	36131767	36175815	8459	processed_transcript	CBR3_antisense_RNA_1
ENSG00000103241	0.943449169558452	71.7342835590081	6.06559165432794	4.74447023326357e-11	6.42443845350552e-10	FOXF1	chr16	+	86510527	86515418	3516	protein_coding	forkhead_box_F1
ENSG00000196569	0.943449169558452	71.7342835590081	6.06559165432794	4.74447023326357e-11	6.42443845350552e-10	LAMA2	chr6	+	128883141	129516569	10094	protein_coding	laminin_subunit_alpha_2
ENSG00000228549	3.7875259485201	99.1603460050651	4.66375102794565	4.75054894173774e-11	6.42443845350552e-10	RP11-108M9.3	chr1	+	16870945	16874092	2963	lincRNA	NA
ENSG00000188263	98.5879894119811	4.22402546552972	-4.50613342104346	4.75054894173774e-11	6.42443845350552e-10	IL17REL	chr22	-	49994513	50012659	3696	protein_coding	interleukin_17_receptor_E-like
ENSG00000204934	4.73554534719345	99.1603460050651	4.35104754367009	4.75054894173774e-11	6.42443845350552e-10	ATP6V0E2-AS1	chr7	-	149867697	149880610	3291	antisense	ATP6V0E2_antisense_RNA_1
ENSG00000182957	1093.99160584353	136.080044804319	-3.00597045032262	4.85106724292763e-11	6.55708668034017e-10	SPATA13	chr13	+	23979805	24307074	9948	protein_coding	spermatogenesis_associated_13
ENSG00000088876	89.1079538340458	3.16919693313913	-4.7617622420621	4.86595587116506e-11	6.57391613335857e-10	ZNF343	chr20	-	2481817	2524702	4643	protein_coding	zinc_finger_protein_343
ENSG00000169918	26.539703107702	272.155503539613	3.35183721241434	4.90587949528995e-11	6.62453412468647e-10	OTUD7A	chr15	-	31475398	31870789	14331	protein_coding	OTU_deubiquitinase_7A
ENSG00000141424	9444.00584197913	1262.65824810874	-2.90281708981833	4.92435062216564e-11	6.64614809195789e-10	SLC39A6	chr18	-	36108532	36129385	3682	protein_coding	solute_carrier_family_39_(zinc_transporter)_member_6
ENSG00000160233	67.3038708714388	579.116418689514	3.1026247927649	5.06454249388394e-11	6.83193861381062e-10	LRRC3	chr21	+	44455486	44462196	5869	protein_coding	leucine_rich_repeat_containing_3
[truncated: 7,269 more rows]
