# Supplementary material for: A positive feedback loop between ZEB2 and ACSL4 regulates lipid metabolism to promote breast cancer metastasis
Source: eLife. 2023 Dec 11;12:RP87510. doi: 10.7554/eLife.87510 (PMC10712958; doi:10.7554/eLife.87510)
Supplement: Figure 1—source data 2. [file elife-87510-fig1-data2.xls]

ID	MCF7	TAXOL	log2FoldChange	pvalue	padj	GeneName	Chrom	Strand	Start	End	GeneLength	GeneType	GeneDescription
ENSG00000115461	151941.601798244	22.8981358637006	-12.6886448897248	1.71940058081394e-77	4.72852353729643e-73	IGFBP5	chr2	-	216672105	216695525	6442	protein_coding	insulin_like_growth_factor_binding_protein_5
ENSG00000171345	45683.1150763152	21.808104855422	-11.0248628458971	8.92780607002703e-65	1.22761797365907e-60	KRT19	chr17	-	41523617	41528308	2336	protein_coding	keratin_19_type_I
ENSG00000085563	58.7069859907873	83450.5687464368	10.4699480642322	1.87013487886845e-63	1.48163221949653e-59	ABCB1	chr7	-	87503633	87713323	5806	protein_coding	ATP_binding_cassette_subfamily_B_member_1
ENSG00000135821	19205.8762652458	4.36767330927077	-12.06427165679	2.15502304570239e-63	1.48163221949653e-59	GLUL	chr1	-	182381704	182392206	9032	protein_coding	glutamate-ammonia_ligase
ENSG00000084207	2.74500333963777	11121.5895549851	11.9166490347811	4.41882042287773e-60	2.43043960899121e-56	GSTP1	chr11	+	67583595	67586660	1915	protein_coding	glutathione_S-transferase_pi_1
ENSG00000153993	10.0843900675811	18375.743070529	10.8127660589875	8.27894075646958e-60	3.79465249572783e-56	SEMA3D	chr7	-	84995553	85186855	8062	protein_coding	sema_domain_immunoglobulin_domain_(Ig)_short_basic_domain_secreted_(semaphorin)_3D
ENSG00000113140	6.41472570341761	13515.2967105385	11.0116217730242	7.09479809485799e-59	2.78734346295271e-55	SPARC	chr5	-	151661096	151687165	4831	protein_coding	secreted_protein_acidic_cysteine-rich_(osteonectin)
ENSG00000091831	18127.92485666	11.9978317798155	-10.5472292084793	3.38529032228485e-58	1.16373586441445e-54	ESR1	chr6	+	151656691	152129619	13629	protein_coding	estrogen_receptor_1
ENSG00000196562	20888.3978680914	16.3579510360724	-10.308217119107	4.61058257700945e-58	1.40183204565662e-54	SULF2	chr20	-	47656348	47786616	6657	protein_coding	sulfatase_2
ENSG00000235123	13267.5107607346	6.54770241941083	-10.9590800284008	5.0973857156344e-58	1.40183204565662e-54	DSCAM-AS1	chr21	+	40383083	40385358	1769	antisense	DSCAM_antisense_RNA_1
ENSG00000196542	29151.4687932747	28.3482913321216	-10.0001534354708	7.36155355456449e-58	1.84045531185525e-54	SPTSSB	chr3	-	161344792	161372880	3745	protein_coding	serine_palmitoyltransferase_small_subunit_B
ENSG00000113494	11410.682121581	7.63772441976772	-10.5230335724357	8.93640546588771e-56	2.04800072264482e-52	PRLR	chr5	-	35048756	35230589	13108	protein_coding	prolactin_receptor
ENSG00000128591	14.6714472879947	14954.1370772581	9.98044828832755	1.13871349544501e-55	2.40890460294101e-52	FLNC	chr7	+	128830377	128859274	9280	protein_coding	filamin_C
ENSG00000101144	8055.73037578816	2.18769296388965	-11.7713080240409	1.24723674738146e-55	2.45001841355268e-52	BMP7	chr20	-	57168748	57266629	5418	protein_coding	bone_morphogenetic_protein_7
ENSG00000153395	7337.40190518104	1.09771269193672	-12.5606367117766	1.36945955076799e-55	2.51076714037803e-52	LPCAT1	chr5	-	1456480	1523977	6494	protein_coding	lysophosphatidylcholine_acyltransferase_1
ENSG00000116299	15053.6991799106	15.2679207244481	-9.93439375886621	6.52805179977018e-55	1.12204970340925e-51	KIAA1324	chr1	+	109113679	109206781	9300	protein_coding	KIAA1324
ENSG00000160182	20948.0292226088	27.258260206801	-9.57973300680673	1.48755073102243e-54	2.40641956787341e-51	TFF1	chr21	-	42362282	42366594	551	protein_coding	trefoil_factor_1
ENSG00000089356	8132.79243393714	4.36767330927077	-10.8245600118075	4.23248684774161e-54	6.46653448887455e-51	FXYD3	chr19	+	35115879	35124324	3334	protein_coding	FXYD_domain_containing_ion_transport_regulator_3
ENSG00000101680	4.57987785670322	7087.38637518442	10.5548556871242	2.18676556701847e-53	3.16517051887237e-50	LAMA1	chr18	-	6941744	7117814	15872	protein_coding	laminin_subunit_alpha_1
ENSG00000229807	5724.60311673001	1.09771269193672	-12.202550358237	6.52033572726592e-53	8.96578764177701e-50	XIST	chrX	-	73820651	73852753	19931	lincRNA	X_inactive_specific_transcript_(non-protein_coding)
ENSG00000109321	16235.3174048163	23.9881669123732	-9.39558657257146	1.18973125067583e-52	1.55803805356362e-49	AREG	chr4	+	74445134	74455009	1648	protein_coding	amphiregulin
ENSG00000083307	6526.41548369274	4.36767330927077	-10.5071057925623	9.98795643912778e-52	1.24853995469297e-48	GRHL2	chr8	+	101492432	101669726	6060	protein_coding	grainyhead-like_transcription_factor_2
ENSG00000039068	22927.7901925846	46.8788198893735	-8.93035644513037	2.5484257869945e-51	3.04714163339721e-48	CDH1	chr16	+	68737225	68835548	6177	protein_coding	cadherin_1_type_1
ENSG00000119125	1.82754864465077	4404.82111552814	11.1345324677891	3.27856820846187e-51	3.75682934587125e-48	GDA	chr9	+	72114595	72257193	7904	protein_coding	guanine_deaminase
ENSG00000117983	14518.8518001581	25.0781979910118	-9.17057349365835	3.7387466534843e-51	4.11277086869887e-48	MUC5B	chr11	+	1223066	1262172	18598	protein_coding	mucin_5B_oligomeric_mucus/gel-forming
ENSG00000147065	7.33214453489527	6860.66001435877	9.84424968297824	6.81365917415825e-51	7.2070169595587e-48	MSN	chrX	+	65588377	65741931	5971	protein_coding	moesin
ENSG00000167601	13.7540369826991	9106.12301097083	9.35712020511941	9.33877611979919e-51	9.51206229891102e-48	AXL	chr19	+	41219203	41261766	5154	protein_coding	AXL_receptor_tyrosine_kinase
ENSG00000224078	2.74500333963777	4659.88827147558	10.6616743491518	1.0855113758065e-50	1.06616601235909e-47	SNHG14	chr15	+	24978583	25419462	36573	processed_transcript	small_nucleolar_RNA_host_gene_14
ENSG00000163993	5346.63206959576	3.27767348587998	-10.6211963672668	2.36015895086677e-50	2.23816314854438e-47	S100P	chr4	+	6693069	6697170	1280	protein_coding	S100_calcium_binding_protein_P
ENSG00000182492	4.57987785670322	5285.56582494038	10.1316680265249	3.18101337277469e-50	2.91603495882256e-47	BGN	chrX	+	153494939	153509554	2453	protein_coding	biglycan
ENSG00000007038	3.66244545564338	4815.7626445529	10.3098035649463	4.43433639591569e-50	3.9338285556154e-47	PRSS21	chr16	+	2817180	2826304	1967	protein_coding	protease_serine_21
ENSG00000198959	37.6066413200733	16491.0801962505	8.77145631546175	9.1068974574484e-50	7.82652459304027e-47	TGM2	chr20	-	38127387	38166578	8036	protein_coding	transglutaminase_2
ENSG00000124664	10150.1670276013	18.5380122243038	-9.0877396806271	1.58533769045578e-49	1.32116278258255e-46	SPDEF	chr6	-	34537802	34556333	1914	protein_coding	SAM_pointed_domain_containing_ETS_transcription_factor
ENSG00000163347	8.2495612111708	6338.53536610794	9.56280601189756	1.98800557392491e-49	1.60800415554438e-46	CLDN1	chr3	-	190305701	190322475	3663	protein_coding	claudin_1
ENSG00000138829	17.4236759818468	9268.53756752014	9.04431435406577	2.77646374724398e-49	2.13806454017905e-46	FBN2	chr5	-	128257909	128659185	13196	protein_coding	fibrillin_2
ENSG00000133424	3678.78895373958	1.38777878078145e-17	-14.8504207674999	2.79881907735885e-49	2.13806454017905e-46	LARGE	chr22	-	33162226	33922841	10687	protein_coding	like-glycosyltransferase
ENSG00000076706	6.41472570341761	5280.1156720357	9.65568950703116	9.91413212101094e-49	7.36887966107897e-46	MCAM	chr11	-	119308529	119321521	7422	protein_coding	melanoma_cell_adhesion_molecule
ENSG00000110975	4553.07635168186	3.27767348587998	-10.389413801197	1.26535566667811e-48	9.15751215508281e-46	SYT10	chr12	-	33374238	33439819	5082	protein_coding	synaptotagmin_10
ENSG00000130508	4162.26162816182	2.18769296388965	-10.8186822996622	1.62782269202602e-48	1.14786543213865e-45	PXDN	chr2	-	1631887	1744852	11257	protein_coding	peroxidasin
ENSG00000166741	7.33214453489527	5412.00937232864	9.50207323187253	2.43635095596748e-48	1.67505219100154e-45	NNMT	chr11	+	114257787	114313285	2919	protein_coding	nicotinamide_N-methyltransferase
ENSG00000105825	7.33214453489527	5337.88729282524	9.48217817114721	3.42653776672561e-48	2.29837110055417e-45	TFPI2	chr7	-	93885397	93890991	2663	protein_coding	tissue_factor_pathway_inhibitor_2
ENSG00000050165	5.49730390528178	4670.78857728522	9.69661568460385	4.03132991283455e-48	2.63965723649674e-45	DKK3	chr11	-	11963106	12009769	5059	protein_coding	dickkopf_WNT_signaling_pathway_inhibitor_3
ENSG00000134954	9.16697626675744	5755.36900532007	9.2737098391721	8.14452632706748e-48	5.20889810513216e-45	ETS1	chr11	-	128458761	128587558	7149	protein_coding	v-ets_avian_erythroblastosis_virus_E26_oncogene_homolog_1
ENSG00000163430	18.3410849555724	8242.81879092018	8.80162391130882	1.20708530917889e-47	7.54455751993831e-45	FSTL1	chr3	-	120392293	120451253	8727	protein_coding	follistatin_like_1
ENSG00000136231	1.38777878078145e-17	2662.95224697131	14.384228245455	3.28412244550262e-47	2.00703669719484e-44	IGF2BP3	chr7	-	23310209	23470467	8511	protein_coding	insulin_like_growth_factor_2_mRNA_binding_protein_3
ENSG00000183853	2.74500333963777	3363.84191064955	10.1915028459752	3.45515383972338e-47	2.06565621187462e-44	KIRREL	chr1	+	157993273	158100262	7872	protein_coding	kin_of_IRRE_like_(Drosophila)
ENSG00000026025	3.66244545564338	3653.79004521246	9.91144415976786	4.12204793943507e-47	2.4119242634554e-44	VIM	chr10	+	17228259	17237593	4965	protein_coding	vimentin
ENSG00000127955	7.33214453489527	4803.77230816238	9.33008061408292	4.65752513156689e-47	2.66847080506711e-44	GNAI1	chr7	+	80133955	80219402	4547	protein_coding	guanine_nucleotide_binding_protein_(G_protein)_alpha_inhibiting_activity_polypeptide_1
ENSG00000100285	11.0018028728265	5599.4946322482	8.97428840592243	5.58236773031955e-47	3.13307540717383e-44	NEFH	chr22	+	29480230	29491390	3783	protein_coding	neurofilament_heavy_polypeptide
ENSG00000166710	3813.64755552614	3.27767348587998	-10.1337517453662	1.00980513606279e-46	5.55413020937254e-44	B2M	chr15	+	44711477	44718877	6089	protein_coding	beta-2-microglobulin
ENSG00000166825	3.66244545564338	3496.82564154056	9.8480983597308	1.22018184649533e-46	6.57965116871924e-44	ANPEP	chr15	-	89784889	89815401	4871	protein_coding	alanyl_(membrane)_aminopeptidase
ENSG00000182963	3.66244545564338	3475.02502991923	9.83907616959281	1.42604526171797e-46	7.54185975817422e-44	GJC1	chr17	-	44798448	44830816	8660	protein_coding	gap_junction_protein_gamma_1
ENSG00000165731	9089.64632261467	23.9881669123732	-8.55875623094106	2.12641648323645e-46	1.10336942840539e-43	RET	chr10	+	43077027	43130351	6661	protein_coding	ret_proto-oncogene
ENSG00000079257	4497.11461897199	6.54770241941083	-9.39828174581534	2.35950416187812e-46	1.20164303621871e-43	LXN	chr3	-	158645822	158672693	1504	protein_coding	latexin
ENSG00000085662	6.41472570341761	4196.6252745596	9.32435787285376	2.92539916867978e-46	1.46275277341568e-43	AKR1B1	chr7	-	134442350	134459284	3660	protein_coding	aldo-keto_reductase_family_1_member_B1_(aldose_reductase)
ENSG00000087303	6.41472570341761	4180.27481584467	9.31872617222491	3.21513250709209e-46	1.57891712638463e-43	NID2	chr14	-	52004803	52069228	6392	protein_coding	nidogen_2
ENSG00000101335	2.74500333963777	3068.44362316956	10.0589048481376	3.35910402815829e-46	1.62067929611195e-43	MYL9	chr20	+	36541484	36551447	2821	protein_coding	myosin_light_chain_9
ENSG00000182636	0.9101298099858	2413.33524386039	11.1776070056983	3.69620996258356e-46	1.75257707208639e-43	NDN	chr15	-	23685400	23687330	1931	protein_coding	necdin_MAGE_family_member
ENSG00000135318	4.57987785670322	3616.72900545684	9.58431034349424	3.81886216444159e-46	1.78004285397132e-43	NT5E	chr6	+	85449584	85495791	4533	protein_coding	5'-nucleotidase_ecto_(CD73)
ENSG00000162722	2.74500333963777	3042.28288922231	10.0465525537245	4.14416418179534e-46	1.88593560692261e-43	TRIM58	chr1	+	247857199	247878205	3225	protein_coding	tripartite_motif_containing_58
ENSG00000165140	4394.36520809425	6.54770241941083	-9.36493785170468	4.1831959573208e-46	1.88593560692261e-43	FBP1	chr9	-	94603133	94640249	1668	protein_coding	fructose-bisphosphatase_1
ENSG00000102854	15.5888571884922	6391.94686457225	8.66749736048491	4.42880737336941e-46	1.96446179959729e-43	MSLN	chr16	+	643262	768865	2642	protein_coding	mesothelin
ENSG00000060982	6.41472570341761	4038.57084031447	9.2689746450605	7.55352126443535e-46	3.29729187767042e-43	BCAT1	chr12	-	24810022	24949459	11775	protein_coding	branched_chain_amino-acid_transaminase_1_cytosolic
ENSG00000135069	2.74500333963777	2964.89071796094	10.009378622304	7.80105708345729e-46	3.35213860706498e-43	PSAT1	chr9	+	78297143	78330093	2188	protein_coding	phosphoserine_aminotransferase_1
ENSG00000170558	1.82754864465077	2573.56973930934	10.3592471808105	1.93889777448334e-45	8.20332733785636e-43	CDH2	chr18	-	27950966	28177446	4950	protein_coding	cadherin_2_type_1_N-cadherin_(neuronal)
ENSG00000154277	35.7718279381021	10148.1922462777	8.14290522276088	5.47087157073463e-45	2.27961271313293e-42	UCHL1	chr4	+	41256413	41268455	2282	protein_coding	ubiquitin_C-terminal_hydrolase_L1
ENSG00000130513	4162.26162816182	7.63772441976772	-9.06811703482497	6.51464951881075e-45	2.67402054353455e-42	GDF15	chr19	+	18374731	18389176	2087	protein_coding	growth_differentiation_factor_15
ENSG00000233276	7.33214453489527	3868.52606967613	9.01770533376785	9.86923723564769e-45	3.99138078261099e-42	GPX1	chr3	-	49357176	49358600	1425	protein_coding	glutathione_peroxidase_1
ENSG00000170315	3154.9504392904	3.27767348587998	-9.86020794903249	1.08875641835687e-44	4.33940438568582e-42	UBB	chr17	+	16380798	16382745	1621	protein_coding	ubiquitin_B
ENSG00000206190	1.38777878078145e-17	2075.42576362875	14.0246269594381	1.5326084588605e-44	6.02118074673179e-42	ATP10A	chr15	-	25677273	25865172	8409	protein_coding	ATPase_class_V_type_10A
ENSG00000135842	20.1759022113556	6569.62184925923	8.33768262649824	1.71167504804377e-44	6.62996837975375e-42	FAM129A	chr1	-	184790724	184974550	8372	protein_coding	family_with_sequence_similarity_129_member_A
ENSG00000164237	3060.45767748399	3.27767348587998	-9.81633988016995	2.2938644111797e-44	8.76160627386844e-42	CMBL	chr5	-	10275875	10308026	3324	protein_coding	carboxymethylenebutenolidase_homolog_(Pseudomonas)
ENSG00000117020	1.82754864465077	2316.32252212157	10.2073197334812	2.58583677033828e-44	9.74152013987301e-42	AKT3	chr1	-	243488233	243851079	9475	protein_coding	v-akt_murine_thymoma_viral_oncogene_homolog_3
ENSG00000137642	2274.2412029294	1.38777878078145e-17	-14.1566069633018	3.96903574890482e-44	1.47503313690043e-41	SORL1	chr11	+	121452203	121633693	19449	protein_coding	sortilin-related_receptor_L(DLR_class)_A_repeats_containing
ENSG00000122786	6.41472570341761	3433.60386783856	9.034860769296	4.15132366947162e-44	1.52220736312185e-41	CALD1	chr7	+	134744252	134970728	9843	protein_coding	caldesmon_1
ENSG00000137573	9099.73778261026	33.7984469860363	-8.06775788111694	4.72858219332591e-44	1.71106235392968e-41	SULF1	chr8	+	69466624	69660915	9404	protein_coding	sulfatase_1
ENSG00000167641	3.66244545564338	2726.17402068212	9.48894379951099	5.68141475427161e-44	2.02915048256134e-41	PPP1R14A	chr19	-	38251237	38256591	1501	protein_coding	protein_phosphatase_1_regulatory_inhibitor_subunit_14A
ENSG00000073792	11.9192148715908	4363.39995345085	8.50021772537602	8.61087938497827e-44	3.03599735854215e-41	IGF2BP2	chr3	-	185643739	185825056	4735	protein_coding	insulin_like_growth_factor_2_mRNA_binding_protein_2
ENSG00000163220	2654.04706114397	2.18769296388965	-10.1695344922176	1.07790329524641e-43	3.75233145855336e-41	S100A9	chr1	+	153357854	153361027	577	protein_coding	S100_calcium_binding_protein_A9
ENSG00000134744	0.9101298099858	1860.68973906226	10.802436952784	2.22100428771019e-43	7.63497986453975e-41	ZCCHC11	chr1	-	52408282	52553487	16199	protein_coding	zinc_finger_CCHC_domain_containing_11
ENSG00000154760	1.38777878078145e-17	1856.3296167357	13.8636821327528	2.37257481875919e-43	8.05533087539461e-41	SLFN13	chr17	-	35435096	35448837	9329	protein_coding	schlafen_family_member_13
ENSG00000169715	0.9101298099858	1836.709066266	10.7837237464744	3.05396206720317e-43	1.02423183914822e-40	MT1E	chr16	+	56625475	56627112	1052	protein_coding	metallothionein_1E
ENSG00000158825	2.74500333963777	2247.65059549517	9.60983564018838	7.19061428469868e-43	2.38251907763251e-40	CDA	chr1	+	20588948	20618908	963	protein_coding	cytidine_deaminase
ENSG00000261780	0.9101298099858	1763.67701729261	10.725190813259	8.25538506078988e-43	2.70275410186646e-40	CTD-2354A18.1	chr18	+	73324941	73349878	2275	processed_transcript	NA
ENSG00000113946	3.66244545564338	2437.31591664922	9.32736674057755	8.94918831244232e-43	2.89543091506443e-40	CLDN16	chr3	+	190322541	190412143	3583	protein_coding	claudin_16
ENSG00000105357	3386.13661379923	7.63772441976772	-8.77040000632489	1.05375135785104e-42	3.36967628979784e-40	MYH14	chr19	+	50188186	50310545	9905	protein_coding	myosin_heavy_chain_14_non-muscle
ENSG00000275216	1.82754864465077	1983.86319478178	9.98380834070953	1.15689459164792e-42	3.65698369711603e-40	RP11-54H7.4	chr13	+	109269634	109273838	4205	lincRNA	NA
ENSG00000204381	0.9101298099858	1725.52594693147	10.6936427131911	1.40778497143029e-42	4.39948801128458e-40	LAYN	chr11	+	111540280	111561745	3144	protein_coding	layilin
ENSG00000132698	2136.63038471704	1.09771269193672	-10.7807676707923	2.41002059458418e-42	7.44696363726512e-40	RAB25	chr1	+	156061160	156070514	1699	protein_coding	RAB25_member_RAS_oncogene_family
ENSG00000124092	1.38777878078145e-17	1668.84435667798	13.7100888533887	3.20469464804747e-42	9.79247861288372e-40	CTCFL	chr20	-	57495966	57525652	8928	protein_coding	CCCTC-binding_factor_(zinc_finger_protein)-like
ENSG00000141934	1884.34388462477	1.38777878078145e-17	-13.8853012189966	4.00606141498493e-42	1.1997170002578e-39	PLPP2	chr19	-	281040	291504	7059	protein_coding	phospholipid_phosphatase_2
ENSG00000115457	2092.59492288642	1.09771269193672	-10.7507252473196	4.01345274803527e-42	1.1997170002578e-39	IGFBP2	chr2	+	216632828	216664436	4767	protein_coding	insulin_like_growth_factor_binding_protein_2
ENSG00000108846	6816.31560721277	29.438322463114	-7.84945622556951	6.19255763414702e-42	1.83119922039438e-39	ABCC3	chr17	+	50634777	50692252	9614	protein_coding	ATP_binding_cassette_subfamily_C_member_3
ENSG00000167779	13.7540369826991	3843.45536631258	8.11271255187736	1.72975448693077e-41	5.06063597288119e-39	IGFBP6	chr12	+	53097436	53102345	1279	protein_coding	insulin_like_growth_factor_binding_protein_6
ENSG00000163395	2.74500333963777	1955.52239966141	9.40898313849994	2.18745758279101e-41	6.33234431414059e-39	IGFN1	chr1	+	201190825	201228952	12116	protein_coding	immunoglobulin-like_and_fibronectin_type_III_domain_containing_1
ENSG00000138685	2.74500333963777	1935.90184919315	9.39443576106751	2.77872443282786e-41	7.96017714866655e-39	FGF2	chr4	+	122826708	122898236	6775	protein_coding	fibroblast_growth_factor_2_(basic)
ENSG00000024422	18.3410849555724	4462.59273631997	7.91638562807268	4.65070641103174e-41	1.31854718566788e-38	EHD2	chr19	+	47713343	47743134	3923	protein_coding	EH_domain_containing_2
ENSG00000185686	10.0843900675811	3210.14759871515	8.29571840083827	5.10640398760766e-41	1.43297159248162e-38	PRAME	chr22	-	22547701	22559361	3775	protein_coding	preferentially_expressed_antigen_in_melanoma
ENSG00000172716	1.38777878078145e-17	1487.89928007444	13.5445286135159	5.30949620506219e-41	1.47491368823652e-38	SLFN11	chr17	-	35350305	35373701	5982	protein_coding	schlafen_family_member_11
ENSG00000147041	3809.97793370885	13.0878609931684	-8.17261480123417	5.8083307154042e-41	1.59734903004331e-38	SYTL5	chrX	+	38006582	38128819	4791	protein_coding	synaptotagmin_like_5
ENSG00000106624	18.3410849555724	4367.76007577478	7.88539790960593	7.85303919359335e-41	2.13828149369317e-38	AEBP1	chr7	+	44104361	44114562	4955	protein_coding	AE_binding_protein_1
ENSG00000155816	2.74500333963777	1850.87946382748	9.3296449013116	8.3418602352485e-41	2.24911272872126e-38	FMN2	chr1	+	240014348	240475189	9691	protein_coding	formin_2
ENSG00000184564	12517.9905047141	73.0395621094273	-7.41881467351939	9.08157208647849e-41	2.42477974708976e-38	SLITRK6	chr13	-	85792790	85799488	4318	protein_coding	SLIT_and_NTRK_like_family_member_6
ENSG00000113657	2.74500333963777	1830.16888277603	9.31341177111952	1.10285727950474e-40	2.91631519650575e-38	DPYSL3	chr5	-	147390811	147510056	7164	protein_coding	dihydropyrimidinase_like_3
ENSG00000196620	1643.06624993046	1.38777878078145e-17	-13.6876443750639	1.13711852537231e-40	2.9782758634537e-38	UGT2B15	chr4	-	68537413	68670628	2191	protein_coding	UDP_glucuronosyltransferase_2_family_polypeptide_B15
ENSG00000119411	1823.79512459393	1.09771269193672	-10.552389211042	1.16350994953212e-40	3.01864972849837e-38	BSPRY	chr9	+	113349541	113371233	2339	protein_coding	B-box_and_SPRY_domain_containing
ENSG00000134874	0.9101298099858	1395.24668059055	10.3871499141908	2.52101950891358e-40	6.47949135650769e-38	DZIP1	chr13	-	95578202	95644703	8470	protein_coding	DAZ_interacting_zinc_finger_protein_1
ENSG00000275832	9.16697626675744	2853.70759868197	8.26166874815334	2.68119122991046e-40	6.82735555683034e-38	ARHGAP23	chr17	+	38419280	38512392	8133	protein_coding	Rho_GTPase_activating_protein_23
ENSG00000160180	1917.37048100365	2.18769296388965	-9.70049711932159	3.14030081439359e-40	7.92306538501268e-38	TFF3	chr21	-	42311667	42315651	1168	protein_coding	trefoil_factor_3
ENSG00000263639	1572.42602987168	1.38777878078145e-17	-13.6242510592336	3.28905997418652e-40	8.22294894091849e-38	MSMB	chr10	-	46033307	46046269	492	protein_coding	microseminoprotein_beta-
ENSG00000091986	27.515164803161	5353.14772095831	7.5971678687097	3.79480375915276e-40	9.40188271896037e-38	CCDC80	chr3	-	112596794	112649530	13071	protein_coding	coiled-coil_domain_containing_80
ENSG00000133169	1.38777878078145e-17	1342.92521263995	13.396642953196	6.36020317224559e-40	1.54814191565351e-37	BEX1	chrX	-	103062651	103064240	864	protein_coding	brain_expressed_X-linked_1
ENSG00000070882	1.82754864465077	1533.68056452036	9.61251880084771	6.36122455433791e-40	1.54814191565351e-37	OSBPL3	chr7	-	24796539	24981634	8100	protein_coding	oxysterol_binding_protein_like_3
ENSG00000101194	1.82754864465077	1518.42013637206	9.59809290749721	8.08557409109117e-40	1.95053836034297e-37	SLC17A9	chr20	+	62952647	62969585	5521	protein_coding	solute_carrier_family_17_(vesicular_nucleotide_transporter)_member_9
ENSG00000129514	10357.5006602361	65.4093460398824	-7.30440285474577	8.76926574194605e-40	2.09707458408051e-37	FOXA1	chr14	-	37589984	37596059	3982	protein_coding	forkhead_box_A1
ENSG00000162493	0.9101298099858	1310.22429516802	10.2964513555502	1.16535572711297e-39	2.76279722856325e-37	PDPN	chr1	+	13583465	13617957	3707	protein_coding	podoplanin
ENSG00000050555	1.38777878078145e-17	1299.32398934352	13.3490294221351	1.43072428192763e-39	3.36293576728989e-37	LAMC3	chr9	+	131009082	131094473	7594	protein_coding	laminin_subunit_gamma_3
ENSG00000182013	1.38777878078145e-17	1290.60374468374	13.3393152015332	1.69434422325205e-39	3.94882715963174e-37	PNMAL1	chr19	-	46466491	46471563	3696	protein_coding	paraneoplastic_Ma_antigen_family-like_1
ENSG00000137285	3.66244545564338	1773.48729252811	8.86868839429926	2.17307368923503e-39	5.0219915569456e-37	TUBB2B	chr6	-	3224261	3231730	2194	protein_coding	tubulin_beta_2B_class_IIb
ENSG00000160886	3.66244545564338	1763.67701729261	8.86068631453866	2.49497295015002e-39	5.71785425850632e-37	LY6K	chr8	+	142700111	142705127	4049	protein_coding	lymphocyte_antigen_6_complex_locus_K
ENSG00000136717	11.9192148715908	2846.07738461371	7.88376051885297	3.15493319964014e-39	7.17056346473583e-37	BIN1	chr2	-	127048027	127107355	6929	protein_coding	bridging_integrator_1
ENSG00000106366	3.66244545564338	1741.87640565784	8.84274338994216	3.34300574903249e-39	7.49019872462493e-37	SERPINE1	chr7	+	101127089	101139266	3190	protein_coding	serpin_peptidase_inhibitor_clade_E_(nexin_plasminogen_activator_inhibitor_type_1)_member_1
ENSG00000090530	1.82754864465077	1432.30772038583	9.51387003863203	3.35003979174891e-39	7.49019872462493e-37	P3H2	chr3	-	189956728	190122437	5605	protein_coding	prolyl_3-hydroxylase_2
ENSG00000134215	4636.5602480191	23.9881669123732	-7.58760701035613	3.45192685411438e-39	7.65576132379028e-37	VAV3	chr1	-	107571160	107965144	7271	protein_coding	vav_guanine_nucleotide_exchange_factor_3
ENSG00000115355	16.5062667383555	3465.21475468962	7.70238193784383	4.02995268585572e-39	8.86621830509745e-37	CCDC88A	chr2	-	55287842	55419921	14537	protein_coding	coiled-coil_domain_containing_88A
ENSG00000072041	1.82754864465077	1375.62613010969	9.45562184155085	9.00436633969848e-39	1.96531014847657e-36	SLC6A15	chr12	-	84859488	84913615	8781	protein_coding	solute_carrier_family_6_(neutral_amino_acid_transporter)_member_15
ENSG00000206538	4.57987785670322	1810.54833230591	8.58609808558638	9.26664316637615e-39	2.00662955683867e-36	VGLL3	chr3	-	86937969	86991119	11574	protein_coding	vestigial_like_family_member_3
ENSG00000148798	0.9101298099858	1193.591022831	10.1619587278234	1.1319285672071e-38	2.43196621302831e-36	INA	chr10	+	103277163	103290351	3231	protein_coding	internexin_neuronal_intermediate_filament_protein_alpha
ENSG00000106541	1510.04245890355	1.09771269193672	-10.2800562571127	1.16524498360438e-38	2.48413971272125e-36	AGR2	chr7	-	16791811	16833433	2845	protein_coding	anterior_gradient_2_protein_disulphide_isomerase_family_member
ENSG00000089327	0.9101298099858	1172.88044175799	10.1367085936508	1.70594413932333e-38	3.60885921350239e-36	FXYD5	chr19	+	35154730	35169883	2993	protein_coding	FXYD_domain_containing_ion_transport_regulator_5
ENSG00000131016	88.0639739141232	11689.4954876111	7.05030698763304	1.98582929341036e-38	4.16887720596018e-36	AKAP12	chr6	+	151239999	151358557	8741	protein_coding	A-kinase_anchoring_protein_12
ENSG00000177508	1570.59121896095	2.18769296388965	-9.41269756691831	4.02535660304553e-38	8.38646454093599e-36	IRX3	chr16	-	54283304	54286763	2911	protein_coding	iroquois_homeobox_3
ENSG00000177469	95.4032197703369	12122.2376282102	6.98742933174359	4.25480720508982e-38	8.79785360505076e-36	PTRF	chr17	-	42402452	42423517	3828	protein_coding	polymerase_I_and_transcript_release_factor
ENSG00000125354	6.41472570341761	1946.80215500888	8.21628098199513	4.60285758564553e-38	9.44650645245057e-36	SEPT6	chrX	-	119615724	119693370	6245	protein_coding	septin_6
ENSG00000018510	8.2495612111708	2163.71824072669	8.01222051731615	6.28426425687302e-38	1.28017445428344e-35	AGPS	chr2	+	177392644	177543836	8197	protein_coding	alkylglycerone_phosphate_synthase
ENSG00000074410	1502.70321525976	2.18769296388965	-9.3489553897757	1.18007334143343e-37	2.38626448255593e-35	CA12	chr15	-	63321378	63382161	7313	protein_coding	carbonic_anhydrase_XII
ENSG00000075340	6.41472570341761	1863.95983080717	8.15354932813832	1.33191764797819e-37	2.67365454285024e-35	ADD2	chr2	-	70607618	70768225	12673	protein_coding	adducin_2
ENSG00000183665	1213.72049668177	1.38777878078145e-17	-13.2507307772845	1.78093068273871e-37	3.54908512362299e-35	TRMT12	chr8	+	124450820	124462150	2331	protein_coding	tRNA_methyltransferase_12_homolog_(S._cerevisiae)
ENSG00000143416	1954.9841046561	6.54770241941083	-8.19649380304289	1.81251456550467e-37	3.58604050834128e-35	SELENBP1	chr1	-	151364302	151372733	3504	protein_coding	selenium_binding_protein_1
ENSG00000017483	3.66244545564338	1457.37842377542	8.58549558121559	2.5951529389597e-37	5.09409169486405e-35	SLC38A5	chrX	-	48458537	48470256	4014	protein_coding	solute_carrier_family_38_member_5
ENSG00000185222	1.38777878078145e-17	1048.6169552899	13.0397870424902	2.61178476773874e-37	5.09409169486405e-35	WBP5	chrX	+	103356445	103358469	1096	protein_coding	WW_domain_binding_protein_5
ENSG00000179388	1321.05693503771	1.09771269193672	-10.0871777525692	2.99524201080294e-37	5.80085567176702e-35	EGR3	chr8	-	22687659	22693302	4855	protein_coding	early_growth_response_3
ENSG00000135046	42.193674037534	5612.57499921929	7.05103261038843	3.66191047132721e-37	7.04239159943844e-35	ANXA1	chr9	+	73151757	73170393	4561	protein_coding	annexin_A1
ENSG00000120645	1.38777878078145e-17	1015.91603778828	12.994085617949	5.52447207885646e-37	1.05378321749629e-34	IQSEC3	chr12	+	66765	178460	7686	protein_coding	IQ_motif_and_Sec7_domain_3
ENSG00000173156	1527.47316255714	3.27767348587998	-8.81380168304125	5.5561094700906e-37	1.05378321749629e-34	RHOD	chr11	+	67056818	67072013	1265	protein_coding	ras_homolog_family_member_D
ENSG00000122861	4.57987785670322	1522.78025870018	8.33639678467723	6.21112738628856e-37	1.16994667294741e-34	PLAU	chr10	+	73909177	73917497	2950	protein_coding	plasminogen_activator_urokinase
ENSG00000101938	1.38777878078145e-17	1008.28582370388	12.9832103668987	6.68614416077235e-37	1.25085476575102e-34	CHRDL1	chrX	-	110673856	110795819	3920	protein_coding	chordin-like_1
ENSG00000107485	23709.4196394883	222.373766940926	-6.73557901473584	6.81746123869017e-37	1.26680406435958e-34	GATA3	chr10	+	8053604	8075198	3253	protein_coding	GATA_binding_protein_3
ENSG00000008517	11.0018028728265	2156.08802665666	7.59745600086302	8.70487720813547e-37	1.60666327584519e-34	IL32	chr16	+	3065297	3082192	3209	protein_coding	interleukin_32
ENSG00000116962	2.74500333963777	1264.44301070332	8.77997826562389	9.0558940014593e-37	1.66030760622755e-34	NID1	chr1	-	235975830	236065162	5864	protein_coding	nidogen_1
ENSG00000178372	1132.07141106652	1.38777878078145e-17	-13.1502707854617	9.65926108256816e-37	1.75920092073978e-34	CALML5	chr10	-	5498697	5499555	859	protein_coding	calmodulin_like_5
ENSG00000111799	35.7718279381021	4688.22906658064	7.02881680478585	9.89708624411516e-37	1.79065637368034e-34	COL12A1	chr6	-	75084326	75206051	12481	protein_coding	collagen_type_XII_alpha_1
ENSG00000082397	3.66244545564338	1376.71616069198	8.50335797749898	1.02260931368257e-36	1.83809011343689e-34	EPB41L3	chr18	-	5392381	5630700	11000	protein_coding	erythrocyte_membrane_protein_band_4.1-like_3
ENSG00000157227	26.5977574016326	3731.18221646639	7.1251124514923	1.38962431080053e-36	2.4695189833612e-34	MMP14	chr14	+	22836557	22849027	4464	protein_coding	matrix_metallopeptidase_14
ENSG00000176697	1.82754864465077	1117.28888202906	9.15556403737814	1.39186008661862e-36	2.4695189833612e-34	BDNF	chr11	-	27654893	27722058	7740	protein_coding	brain-derived_neurotrophic_factor
ENSG00000176165	1.38777878078145e-17	973.404845028691	12.9324235612551	1.56829344913657e-36	2.76472039389133e-34	FOXG1	chr14	+	28765388	28770277	4890	protein_coding	forkhead_box_G1
ENSG00000118523	2.74500333963777	1212.12154273737	8.71901638127527	2.50497501047856e-36	4.38785463459687e-34	CTGF	chr6	-	131948176	131951373	2339	protein_coding	connective_tissue_growth_factor
ENSG00000165025	1209.13346940072	1.09771269193672	-9.95947189907005	2.55552234980704e-36	4.44806456595212e-34	SYK	chr9	+	90801787	90898549	5210	protein_coding	spleen_tyrosine_kinase
ENSG00000168453	1957.73632102086	8.72774907734345	-7.79024109876239	2.59277625042984e-36	4.48452450711139e-34	HR	chr8	-	22114415	22133384	8784	protein_coding	hair_growth_associated
ENSG00000154734	4.57987785670322	1423.58747572833	8.23922788133259	3.23026438851447e-36	5.55221880928352e-34	ADAMTS1	chr21	-	26835747	26845409	7063	protein_coding	ADAM_metallopeptidase_with_thrombospondin_type_1_motif_1
ENSG00000104518	12.8366262054278	2185.51885235519	7.39692951513459	6.07348868934457e-36	1.03743485991096e-33	GSDMD	chr8	+	143553207	143563062	5116	protein_coding	gasdermin_D
ENSG00000075461	1045.83529813616	1.38777878078145e-17	-13.0359753002404	6.49303502149228e-36	1.10225281559296e-33	CACNG4	chr17	+	66964910	67033398	3380	protein_coding	calcium_channel_voltage-dependent_gamma_subunit_4
ENSG00000244509	0.9101298099858	911.273101747222	9.77264933496177	7.65586925603447e-36	1.29168135220984e-33	APOBEC3C	chr22	+	39014083	39020352	2818	protein_coding	apolipoprotein_B_mRNA_editing_enzyme_catalytic_polypeptide-like_3C
ENSG00000234456	1.82754864465077	1038.80668003991	9.05050039475158	7.99479885381375e-36	1.34064001999227e-33	MAGI2-AS3	chr7	+	79452877	79471208	11625	processed_transcript	MAGI2_antisense_RNA_3
ENSG00000068366	11.0018028728265	1960.97255256922	7.46061705228823	8.74938073738169e-36	1.45828314944687e-33	ACSL4	chrX	-	109624244	109733403	6415	protein_coding	acyl-CoA_synthetase_long-chain_family_member_4
ENSG00000153707	0.9101298099858	898.192734737622	9.75179360099095	1.0816354230841e-35	1.79193107049614e-33	PTPRD	chr9	-	8314246	10612723	11045	protein_coding	protein_tyrosine_phosphatase_receptor_type_D
ENSG00000156049	1133.90622197954	1.09771269193672	-9.86681012897811	1.19892782247873e-35	1.97435413449028e-33	GNA14	chr9	-	77423079	77648307	2721	protein_coding	guanine_nucleotide_binding_protein_(G_protein)_alpha_14
ENSG00000196730	7.33214453489527	1645.95371445927	7.78490402010458	1.2208496797749e-35	1.99848732401723e-33	DAPK1	chr9	+	87497228	87708633	8907	protein_coding	death-associated_protein_kinase_1
ENSG00000143217	1231.15120034905	2.18769296388965	-9.06143107352869	1.48473508247408e-35	2.41607689367572e-33	PVRL4	chr1	-	161070995	161089599	3502	protein_coding	poliovirus_receptor-related_4
ENSG00000140030	0.9101298099858	882.932306558315	9.72707462849886	1.62134588553295e-35	2.62286077635538e-33	GPR65	chr14	+	88005124	88014811	4522	protein_coding	G_protein-coupled_receptor_65
ENSG00000272620	2.74500333963777	1120.55897377811	8.60571196844135	1.68865447146014e-35	2.71577114734651e-33	AFAP1-AS1	chr4	+	7754090	7778928	6795	antisense	AFAP1_antisense_RNA_1
ENSG00000136999	2.74500333963777	1111.8387291139	8.59444211353221	2.00764023339412e-35	3.2100066313123e-33	NOV	chr8	+	119416306	119424353	2673	protein_coding	nephroblastoma_overexpressed
ENSG00000109846	0.9101298099858	873.122031299337	9.71095724924771	2.13144324682299e-35	3.38825553357682e-33	CRYAB	chr11	-	111908565	111923722	3034	protein_coding	crystallin_alpha_B
ENSG00000128340	1.38777878078145e-17	867.671878377385	12.7665543063128	2.51525286134946e-35	3.97540051379147e-33	RAC2	chr22	-	37225261	37244448	2532	protein_coding	ras-related_C3_botulinum_toxin_substrate_2_(rho_family_small_GTP_binding_protein_Rac2)
ENSG00000059804	2.74500333963777	1100.93842328326	8.58022985410525	2.5519196033114e-35	4.01030520060953e-33	SLC2A3	chr12	-	7919230	7936275	6159	protein_coding	solute_carrier_family_2_(facilitated_glucose_transporter)_member_3
ENSG00000152661	10.0843900675811	1874.86013662348	7.51989919137494	2.60124591818899e-35	4.06459454523383e-33	GJA1	chr6	+	121435692	121449727	3037	protein_coding	gap_junction_protein_alpha_1
ENSG00000166206	1.38777878078145e-17	864.401786624109	12.7611075247344	2.73347424106412e-35	4.24707768946353e-33	GABRB3	chr15	-	26543546	26939539	12730	protein_coding	gamma-aminobutyric_acid_(GABA)_A_receptor_beta_3
ENSG00000229251	1.38777878078145e-17	855.681541948316	12.7464814307726	3.51432723092741e-35	5.42963557178285e-33	HNRNPA1P8	chr7	+	84983556	84984506	951	processed_pseudogene	heterogeneous_nuclear_ribonucleoprotein_A1_pseudogene_8
ENSG00000167861	4192.53600815328	35.9785092207799	-6.8599037657896	4.14587115137266e-35	6.3695867337374e-33	HID1	chr17	-	74950743	74973166	6196	protein_coding	HID1_domain_containing
ENSG00000135525	2708.17398296195	19.628043016514	-7.09975288667732	4.71901192679101e-35	7.20986372214886e-33	MAP7	chr6	-	136342281	136550819	5447	protein_coding	microtubule_associated_protein_7
ENSG00000102109	1.82754864465077	960.324478023885	8.93718033306431	5.37033174883191e-35	8.1596405206976e-33	PCSK1N	chrX	-	48831094	48835633	1363	protein_coding	proprotein_convertase_subtilisin/kexin_type_1_inhibitor
ENSG00000118513	3374.21034289228	27.258260206801	-6.94558745217794	5.65151092051152e-35	8.53968141895534e-33	MYB	chr6	+	135181315	135219173	5493	protein_coding	v-myb_avian_myeloblastosis_viral_oncogene_homolog
ENSG00000115414	3000.82632294488	251696.788898203	6.39012065061092	5.88663058193984e-35	8.84635123682664e-33	FN1	chr2	-	215360440	215436172	17315	protein_coding	fibronectin_1
ENSG00000105388	1162.34579112934	2.18769296388965	-8.97847156417532	5.96751011666559e-35	8.91915737600111e-33	CEACAM5	chr19	+	41708585	41729798	3351	protein_coding	carcinoembryonic_antigen-related_cell_adhesion_molecule_5
ENSG00000125726	3.66244545564338	1159.80007476384	8.25602589536338	6.48438114444665e-35	9.63929545153661e-33	CD70	chr19	-	6583183	6604103	1532	protein_coding	CD70_molecule
ENSG00000166250	12.8366262054278	1980.59310303715	7.25489420346412	6.65840183754706e-35	9.8447692975474e-33	CLMP	chr11	-	123069865	123195281	5097	protein_coding	CXADR-like_membrane_protein
ENSG00000115339	1440.3196442831	5.45768452873822	-8.01341342126238	6.79962134986685e-35	9.99980677768386e-33	GALNT3	chr2	-	165747591	165794682	4686	protein_coding	polypeptide_N-acetylgalactosaminyltransferase_3
ENSG00000087258	3.66244545564338	1147.80973835207	8.24103479900505	8.33334597778469e-35	1.21901780710137e-32	GNAO1	chr16	+	56191390	56357444	9813	protein_coding	guanine_nucleotide_binding_protein_(G_protein)_alpha_activating_activity_polypeptide_O
ENSG00000091129	4736.55744253232	44.6987578293512	-6.72372795576488	8.54600393852097e-35	1.24351139848289e-32	NRCAM	chr7	-	108147623	108456717	8193	protein_coding	neuronal_cell_adhesion_molecule
ENSG00000131435	1.38777878078145e-17	821.89059382397	12.6883619318431	9.02880938633054e-35	1.30684887859724e-32	PDLIM4	chr5	+	132257671	132273454	3192	protein_coding	PDZ_and_LIM_domain_4
ENSG00000135549	7101.62870346013	73.0395621094273	-6.6010450797092	9.86717135912287e-35	1.4207176939646e-32	PKIB	chr6	+	122471917	122726373	3432	protein_coding	protein_kinase_(cAMP-dependent_catalytic)_inhibitor_beta
ENSG00000101017	1.38777878078145e-17	815.350410314935	12.6768374317223	1.10810270161244e-34	1.58718397901269e-32	CD40	chr20	+	46118272	46129863	2527	protein_coding	CD40_molecule_TNF_receptor_superfamily_member_5
ENSG00000189334	3435.67650833555	29.438322463114	-6.86108566910355	1.20497202755272e-34	1.71699148858691e-32	S100A14	chr1	-	153614255	153616986	1277	protein_coding	S100_calcium_binding_protein_A14
ENSG00000114209	1019.23053988347	1.09771269193672	-9.71300802783551	1.57109671873457e-34	2.22715107535667e-32	PDCD10	chr3	-	167683298	167734939	3275	protein_coding	programmed_cell_death_10
ENSG00000163565	0.9101298099858	802.270043295727	9.58887894363121	1.6282861896583e-34	2.29638453855349e-32	IFI16	chr1	+	158999968	159055155	5294	protein_coding	interferon_gamma-inducible_protein_16
ENSG00000103067	5241.1304423606	52.3289748806695	-6.64293751178844	1.78684718542076e-34	2.50714716562533e-32	ESRP2	chr16	-	68229111	68238102	5563	protein_coding	epithelial_splicing_regulatory_protein_2
ENSG00000109113	4.57987785670322	1205.58135924111	7.99944719048197	1.80373928321257e-34	2.5180017272908e-32	RAB34	chr17	-	28714281	28718429	3328	protein_coding	RAB34_member_RAS_oncogene_family
ENSG00000128833	6359.44769103155	66.4993769246016	-6.57691004204377	1.8434585225065e-34	2.56045216300259e-32	MYO5C	chr15	-	52192322	52295798	10045	protein_coding	myosin_VC
ENSG00000102038	2.74500333963777	1011.55591545437	8.45808569033521	1.99081180843848e-34	2.75122188662646e-32	SMARCA1	chrX	-	129446501	129523500	4363	protein_coding	SWI/SNF_related_matrix_associated_actin_dependent_regulator_of_chromatin_subfamily_a_member_1
ENSG00000118898	2538.45397386803	19.628043016514	-7.00638724467079	2.2569716065018e-34	3.1034488075203e-32	PPL	chr16	-	4882507	4960741	7686	protein_coding	periplakin
ENSG00000137440	0.9101298099858	778.289370423029	9.54510415101966	3.36701568830481e-34	4.60678101711795e-32	FGFBP1	chr4	-	15935569	15938740	1359	protein_coding	fibroblast_growth_factor_binding_protein_1
ENSG00000164741	21.0933105412288	2576.83983105312	6.92376935691376	3.449150279203e-34	4.69579613011691e-32	DLC1	chr8	-	13083361	13604610	12794	protein_coding	DLC1_Rho_GTPase_activating_protein
ENSG00000212719	0.9101298099858	773.929248081932	9.53700040175547	3.80832504632124e-34	5.15924862556061e-32	C17orf51	chr17	-	21524790	21574458	8760	protein_coding	chromosome_17_open_reading_frame_51
ENSG00000112837	0.9101298099858	767.389064569921	9.52475878426457	4.73127709679477e-34	6.37817899210554e-32	TBX18	chr6	-	84687351	84764519	8469	protein_coding	T-box_18
ENSG00000100219	103801.667999453	1348.37536555172	-6.26634028975476	4.97455107041156e-34	6.67342092621406e-32	XBP1	chr22	-	28794555	28800597	3028	protein_coding	X-box_binding_protein_1
ENSG00000066056	1.82754864465077	869.851939546192	8.79444651729088	5.70434538686275e-34	7.61530109146178e-32	TIE1	chr1	+	43300993	43323108	6694	protein_coding	tyrosine_kinase_with_immunoglobulin-like_and_EGF-like_domains_1
ENSG00000134871	5.49730390528178	1233.92215439072	7.77630157387701	5.86876525749969e-34	7.79695233557966e-32	COL4A2	chr13	+	110305812	110513027	8706	protein_coding	collagen_type_IV_alpha_2
ENSG00000122591	17.4236759818468	2205.13940282064	6.97290082666992	6.00912060153717e-34	7.94503969533047e-32	FAM126A	chr7	-	22889371	23014130	14499	protein_coding	family_with_sequence_similarity_126_member_A
ENSG00000174197	1143.08027654438	3.27767348587998	-8.39562312459922	6.17682426247802e-34	8.12769588719656e-32	MGA	chr15	+	41621224	41773081	17651	protein_coding	MGA_MAX_dimerization_protein
ENSG00000148488	1141.24546563144	3.27767348587998	-8.39330579437702	6.44237912755705e-34	8.43675563747364e-32	ST8SIA6	chr10	-	17318383	17454330	2627	protein_coding	ST8_alpha-N-acetyl-neuraminide_alpha-28-sialyltransferase_6
ENSG00000144476	9778.61781867527	116.64079295852	-6.3880590023709	7.70083516472418e-34	1.0036998477018e-31	ACKR3	chr2	+	236567787	236582358	2258	protein_coding	atypical_chemokine_receptor_3
ENSG00000107738	1.82754864465077	848.051327856522	8.75783323512756	1.05325389071738e-33	1.36629883248201e-31	C10orf54	chr10	-	71747559	71773498	5128	protein_coding	chromosome_10_open_reading_frame_54
ENSG00000160179	1027.48718899683	2.18769296388965	-8.80057405742868	1.13439442252936e-33	1.46464699596149e-31	ABCG1	chr21	+	42199689	42297244	6121	protein_coding	ATP_binding_cassette_subfamily_G_member_1
ENSG00000130303	36.689234652651	3548.05707885044	6.5904137671486	1.47317941625724e-33	1.89317323020983e-31	BST2	chr19	-	17402939	17405648	1119	protein_coding	bone_marrow_stromal_cell_antigen_2
ENSG00000162409	1.82754864465077	820.800563239157	8.71071997771834	2.28338055131223e-33	2.9076147508628e-31	PRKAA2	chr1	+	56645322	56715335	9354	protein_coding	protein_kinase_AMP-activated_alpha_2_catalytic_subunit
ENSG00000254585	1.38777878078145e-17	718.337688214734	12.4941073822799	2.2837161782712e-33	2.9076147508628e-31	MAGEL2	chr15	-	23643544	23647841	4298	protein_coding	MAGE_family_member_L2
ENSG00000169515	1.38777878078145e-17	713.977565870657	12.4853253508826	2.60855202016938e-33	3.30588889892526e-31	CCDC8	chr19	-	46410372	46413584	3213	protein_coding	coiled-coil_domain_containing_8
ENSG00000186493	811.896906419692	1.38777878078145e-17	-12.6707403292307	2.80172792861148e-33	3.53441833783231e-31	C5orf38	chr5	+	2752131	2755397	1925	protein_coding	chromosome_5_open_reading_frame_38
ENSG00000162670	1067.8530291008	3.27767348587998	-8.29742118595546	3.14981112220114e-33	3.95538610372847e-31	BRINP3	chr1	-	190097662	190478404	4287	protein_coding	bone_morphogenetic_protein/retinoic_acid_inducible_neural-specific_3
ENSG00000140937	1.38777878078145e-17	701.987229423166	12.4608954301455	3.90425789307952e-33	4.88049983261727e-31	CDH11	chr16	-	64943753	65126112	13381	protein_coding	cadherin_11_type_2_OB-cadherin_(osteoblast)
ENSG00000120262	2301.7633665705	20.7180739007492	-6.78766083366616	5.20260694951636e-33	6.47406758907916e-31	CCDC170	chr6	+	151494030	151621193	5419	protein_coding	coiled-coil_domain_containing_170
ENSG00000176046	2086.17308470267	17.4479815520228	-6.89210022076031	5.25591420663825e-33	6.51094128814228e-31	NUPR1	chr16	-	28532708	28539174	5674	protein_coding	nuclear_protein_1_transcriptional_regulator
ENSG00000101160	216.500756003284	15822.8914501925	6.19063225664542	6.35023407810741e-33	7.8132587665512e-31	CTSZ	chr20	-	58995185	59007247	2038	protein_coding	cathepsin_Z
ENSG00000080200	2.74500333963777	875.302092468058	8.24938851813367	6.36402299446373e-33	7.8132587665512e-31	CRYBG3	chr3	+	97822040	97944963	10929	protein_coding	crystallin_beta-gamma_domain_containing_3
ENSG00000263753	1.82754864465077	784.829553934318	8.64607705058367	6.65972716787028e-33	8.13996252638224e-31	LINC00667	chr18	+	5237826	5246508	6652	lincRNA	long_intergenic_non-protein_coding_RNA_667
ENSG00000132746	1414.63229152554	8.72774907734345	-7.32151891857176	6.69452394585034e-33	8.146287744904e-31	ALDH3B2	chr11	-	67662162	67681200	3235	protein_coding	aldehyde_dehydrogenase_3_family_member_B2
ENSG00000149948	1.38777878078145e-17	684.54674004149	12.4246058206673	7.23871329079993e-33	8.76968520750172e-31	HMGA2	chr12	+	65824131	65966295	15403	protein_coding	high_mobility_group_AT-hook_2
ENSG00000150540	1099.04481462957	4.36767330927077	-7.9372086640941	9.11814483434369e-33	1.09981623284775e-30	HNMT	chr2	+	137964020	138016364	4756	protein_coding	histamine_N-methyltransferase
ENSG00000178773	11.0018028728265	1471.54882134301	7.04641174374235	9.212857981232e-33	1.10638780498629e-30	CPNE7	chr16	+	89575768	89597246	3048	protein_coding	copine_VII
ENSG00000169554	0.9101298099858	673.646434175711	9.33682276940653	1.06373864678058e-32	1.2719076750049e-30	ZEB2	chr2	-	144384081	144524583	21963	protein_coding	zinc_finger_E-box_binding_homeobox_2
ENSG00000187498	0.9101298099858	671.466373002341	9.33214714799101	1.14158605457027e-32	1.35004020568119e-30	COL4A1	chr13	-	110148963	110307149	8188	protein_coding	collagen_type_IV_alpha_1
ENSG00000072840	1.38777878078145e-17	671.466373002341	12.3967767245227	1.14158605457027e-32	1.35004020568119e-30	EVC	chr4	+	5711197	5814305	7148	protein_coding	Ellis_van_Creveld_protein
ENSG00000105784	4.57987785670322	1013.73597662134	7.74942662692629	1.14381065388065e-32	1.35004020568119e-30	RUNDC3B	chr7	+	87627548	87832296	4710	protein_coding	RUN_domain_containing_3B
ENSG00000159251	1.38777878078145e-17	666.016220068592	12.3850209429267	1.36324612420911e-32	1.60216374623397e-30	ACTC1	chr15	-	34788096	34796139	4639	protein_coding	actin_alpha_cardiac_muscle_1
ENSG00000180964	0.9101298099858	663.836158894961	9.3156621002595	1.46404475521614e-32	1.71330616226379e-30	TCEAL8	chrX	-	103252995	103255203	1222	protein_coding	transcription_elongation_factor_A_(SII)-like_8
ENSG00000105928	4.57987785670322	1000.65560961919	7.73069238086477	1.59589532647744e-32	1.8596914141295e-30	DFNA5	chr7	-	24698353	24758113	8897	protein_coding	deafness_autosomal_dominant_5
ENSG00000137841	4.57987785670322	999.565579035643	7.7291201568259	1.6345969026122e-32	1.89675314003114e-30	PLCB2	chr15	-	40278176	40307935	7350	protein_coding	phospholipase_C_beta_2
ENSG00000070731	2056.816110148	18.5380122243038	-6.78479445129727	1.6681131908078e-32	1.92751180085737e-30	ST6GALNAC2	chr17	-	76563710	76586956	7558	protein_coding	ST6_(alpha-N-acetyl-neuraminyl-23-beta-galactosyl-13)-N-acetylgalactosaminide_alpha-26-sialyltransferase_2
ENSG00000105855	40.3588610654512	3455.40447945999	6.41518056218869	1.96845615212742e-32	2.26504236986009e-30	ITGB8	chr7	+	20330702	20415754	15156	protein_coding	integrin_subunit_beta_8
ENSG00000152377	13.7540369826991	1630.69328631313	6.87585368214621	2.09333759298312e-32	2.39870321435954e-30	SPOCK1	chr5	-	136975298	137598379	6222	protein_coding	sparc/osteonectin_cwcv_and_kazal-like_domains_proteoglycan_(testican)_1
ENSG00000142156	99.0728425904154	7331.55322530352	6.20759505138979	2.22995457521596e-32	2.54464650510432e-30	COL6A1	chr21	+	45981737	46005050	5343	protein_coding	collagen_type_VI_alpha_1
ENSG00000077274	1.38777878078145e-17	650.755791851565	12.3515858194305	2.33942399815019e-32	2.65853303194745e-30	CAPN6	chrX	-	111245103	111270523	3568	protein_coding	calpain_6
ENSG00000175175	1327.4787732288	8.72774907734345	-7.22978941282056	3.07460564628584e-32	3.4796185135188e-30	PPM1E	chr17	+	58755869	58985176	6542	protein_coding	protein_phosphatase_Mg2+/Mn2+_dependent_1E
ENSG00000143546	733.000036926946	1.38777878078145e-17	-12.5232821921408	3.19179045850456e-32	3.59743563112024e-30	S100A8	chr1	-	153390032	153391188	1006	protein_coding	S100_calcium_binding_protein_A8
ENSG00000142910	1.38777878078145e-17	642.035547154374	12.3321262713018	3.2531269251704e-32	3.65160177833106e-30	TINAGL1	chr1	+	31576485	31587686	5281	protein_coding	tubulointerstitial_nephritis_antigen-like_1
ENSG00000160588	812.814311878417	1.09771269193672	-9.38657257462782	3.46887565270837e-32	3.87794915955825e-30	MPZL3	chr11	-	118226690	118252350	3968	protein_coding	myelin_protein_zero-like_3
ENSG00000107562	881.619721255917	2.18769296388965	-8.57971258871327	4.41124350569832e-32	4.91148209110159e-30	CXCL12	chr10	-	44370165	44386493	6077	protein_coding	chemokine_(C-X-C_motif)_ligand_12
ENSG00000074047	0.9101298099858	633.31530245585	9.24777107689073	4.54367278715943e-32	5.03853005321256e-30	GLI2	chr2	+	120735623	120992653	7406	protein_coding	GLI_family_zinc_finger_2
ENSG00000154864	7.33214453489527	1165.25022767814	7.28666235117645	5.11238322364391e-32	5.64641168808961e-30	PIEZO2	chr18	-	10666483	11148762	14796	protein_coding	piezo-type_mechanosensitive_ion_channel_component_2
ENSG00000129993	2600.8375447795	28.3482913321216	-6.51369946381961	5.66844836769104e-32	6.23551994239485e-30	CBFA2T3	chr16	-	88874858	88977204	5972	protein_coding	core-binding_factor_runt_domain_alpha_subunit_2;_translocated_to_3
ENSG00000175352	0.9101298099858	624.595057755939	9.22777201235442	6.37498146613453e-32	6.98479543028548e-30	NRIP3	chr11	-	8980576	9004049	4123	protein_coding	nuclear_receptor_interacting_protein_3
ENSG00000215845	790.796580866104	1.09771269193672	-9.34695989854999	6.65654435620948e-32	7.26435025159194e-30	TSTD1	chr1	-	161037631	161038990	1210	protein_coding	thiosulfate_sulfurtransferase_(rhodanese)-like_domain_containing_1
ENSG00000188959	1004.55205256977	4.36767330927077	-7.80752700118875	7.7345331885651e-32	8.40740700469284e-30	C9orf152	chr9	-	110190048	110208189	2947	protein_coding	chromosome_9_open_reading_frame_152
ENSG00000157168	0.9101298099858	618.054874230061	9.21258865195123	8.01024048812942e-32	8.6728198292932e-30	NRG1	chr8	+	31639386	32767959	11328	protein_coding	neuregulin_1
ENSG00000181885	1135.74103289254	6.54770241941083	-7.41304081038661	8.96741997650293e-32	9.67109869701204e-30	CLDN7	chr17	-	7259903	7263983	2492	protein_coding	claudin_7
ENSG00000198125	1258.67336403204	8.72774907734345	-7.15301237035865	1.10452763623136e-31	1.1865474423437e-29	MB	chr22	-	35606764	35637951	2168	protein_coding	myoglobin
ENSG00000197614	1.38777878078145e-17	609.334629527585	12.256721935884	1.13270012460861e-31	1.21207728120083e-29	MFAP5	chr12	-	8637346	8662888	3876	protein_coding	microfibrillar_associated_protein_5
ENSG00000260549	1.38777878078145e-17	608.244598939668	12.2541393031927	1.17750630042384e-31	1.25513956464946e-29	MT1L	chr16	+	56617476	56618818	411	unitary_pseudogene	metallothionein_1L_(gene/pseudogene)
ENSG00000147889	84.3943508617852	5879.63249154471	6.12021845231175	1.40324689283629e-31	1.48998813899192e-29	CDKN2A	chr9	-	21967753	21995301	4329	protein_coding	cyclin-dependent_kinase_inhibitor_2A
ENSG00000197308	764.191822550988	1.09771269193672	-9.29759643320894	1.51718656199899e-31	1.60477490928978e-29	GATA3-AS1	chr10	-	8050450	8053484	2214	lincRNA	GATA3_antisense_RNA_1
ENSG00000115919	1370.59682965175	10.9078032090939	-6.9580407268752	1.53047758319257e-31	1.61263080518692e-29	KYNU	chr2	+	142877498	143055832	17600	protein_coding	kynureninase
ENSG00000130222	684.377547539048	1.38777878078145e-17	-12.4242797305347	1.64109963664203e-31	1.72259088195773e-29	GADD45G	chr9	+	89605013	89606555	1322	protein_coding	growth_arrest_and_DNA_damage_inducible_gamma
ENSG00000140832	973.360267023433	4.36767330927077	-7.76202651829591	1.67322210381234e-31	1.74393697516532e-29	MARVELD3	chr16	+	71626161	71642114	6446	protein_coding	MARVEL_domain_containing_3
ENSG00000233237	1.38777878078145e-17	599.524354235444	12.2333100955126	1.67411861911801e-31	1.74393697516532e-29	LINC00472	chr6	-	71344344	71420769	3443	lincRNA	long_intergenic_non-protein_coding_RNA_472
ENSG00000227825	1.38777878078145e-17	587.534017764472	12.2041698646812	2.69746257581441e-31	2.78883151494256e-29	SLC9A7P1	chr12	-	98453835	98457145	3311	transcribed_processed_pseudogene	solute_carrier_family_9_subfamily_A_(NHE7_cation_proton_antiporter_7)_member_7_pseudogene_1
ENSG00000172260	1.38777878078145e-17	587.534017764472	12.2041698646812	2.69746257581441e-31	2.78883151494256e-29	NEGR1	chr1	-	71395940	72282734	13417	protein_coding	neuronal_growth_regulator_1
ENSG00000279192	1.38777878078145e-17	586.443987176043	12.2014913327766	2.80801432072485e-31	2.8922547503466e-29	PWAR5	chr15	+	24985053	24988232	3180	TEC	Prader_Willi/Angelman_region_RNA_5
ENSG00000092445	664.194627402316	1.38777878078145e-17	-12.3811017732053	3.30611018094909e-31	3.39258716739854e-29	TYRO3	chr15	+	41557675	41583586	10945	protein_coding	TYRO3_protein_tyrosine_kinase
ENSG00000161671	660.525005558334	1.38777878078145e-17	-12.3731104849667	3.67865219280072e-31	3.76084066744285e-29	EMC10	chr19	+	50476400	50490870	10748	protein_coding	ER_membrane_protein_complex_subunit_10
ENSG00000171517	1.38777878078145e-17	574.453650701513	12.171694515388	4.57027210152997e-31	4.65507603941391e-29	LPAR3	chr1	-	84811602	84893213	3543	protein_coding	lysophosphatidic_acid_receptor_3
ENSG00000064270	1967.82778102493	21.808104855422	-6.48796990721923	4.74745664858982e-31	4.81770499235678e-29	ATP2C2	chr16	+	84368527	84464187	7352	protein_coding	ATPase_Ca++_transporting_type_2C_member_2
ENSG00000078114	2436.62196840608	29.438322463114	-6.36539653788196	4.89529966313856e-31	4.94947191308726e-29	NEBL	chr10	-	20779973	21174187	13654	protein_coding	nebulette
ENSG00000006468	0.9101298099858	570.093528346289	9.09607531505939	5.38743916765716e-31	5.42710492856189e-29	ETV1	chr7	-	13891228	13991425	9616	protein_coding	ets_variant_1
ENSG00000151388	2.74500333963777	722.69781055857	7.97304073832343	5.97545369085332e-31	5.99747999825391e-29	ADAMTS12	chr5	-	33523535	33892192	9778	protein_coding	ADAM_metallopeptidase_with_thrombospondin_type_1_motif_12
ENSG00000034053	4.57987785670322	857.861603117318	7.50859174632256	6.17419673087884e-31	6.1744212471236e-29	APBA2	chr15	+	28884483	29118315	6869	protein_coding	amyloid_beta_(A4)_precursor_protein-binding_family_A_member_2
ENSG00000167083	1.38777878078145e-17	558.103191866975	12.1300445248863	8.8831754345936e-31	8.85131187053473e-29	GNGT2	chr17	-	49202791	49210574	1689	protein_coding	guanine_nucleotide_binding_protein_(G_protein)_gamma_transducing_activity_polypeptide_2
ENSG00000147676	4864.0768006721	73.0395621094273	-6.05507343884445	9.53722905367167e-31	9.46871249837634e-29	MAL2	chr8	+	119165034	119245673	3430	protein_coding	mal_T-cell_differentiation_protein_2_(gene/pseudogene)
ENSG00000163520	38.524047943058	2824.27677299003	6.19112126658965	9.87955153312252e-31	9.77329304720872e-29	FBLN2	chr3	+	13549131	13638422	4812	protein_coding	fibulin_2
ENSG00000154640	4.57987785670322	840.421113764271	7.47896331644594	1.02203916601512e-30	1.00742290697426e-28	BTG3	chr21	-	17593653	17612947	2306	protein_coding	BTG_family_member_3
ENSG00000213949	1.82754864465077	633.31530245585	8.3366730676245	1.09807646448624e-30	1.07850717320843e-28	ITGA1	chr5	+	52787896	52959210	18566	protein_coding	integrin_subunit_alpha_1
ENSG00000091592	3.66244545564338	770.659156325982	7.66638807838759	1.17791958239569e-30	1.15281019343287e-28	NLRP1	chr17	-	5499427	5619424	12808	protein_coding	NLR_family_pyrin_domain_containing_1
ENSG00000122691	1.82754864465077	627.865149518571	8.32420617784214	1.3238834547835e-30	1.29106804574472e-28	TWIST1	chr7	-	19020991	19117672	2033	protein_coding	twist_family_bHLH_transcription_factor_1
ENSG00000121068	3735.66809190835	54.5090368167509	-6.09568370675201	1.34854310216827e-30	1.31046939408938e-28	TBX2	chr17	+	61399896	61409466	6029	protein_coding	T-box_2
ENSG00000023171	4.57987785670322	830.610838502115	7.46202597868237	1.35832989253953e-30	1.31533205544822e-28	GRAMD1B	chr11	+	123454398	123627774	12517	protein_coding	GRAM_domain_containing_1B
ENSG00000005001	761.439606172992	2.18769296388965	-8.36831965410759	1.41791547925829e-30	1.36821381035377e-28	PRSS22	chr16	-	2852727	2858170	2387	protein_coding	protease_serine_22
ENSG00000123364	888.041559462001	4.36767330927077	-7.62969854615631	1.4704414326279e-30	1.41393740694755e-28	HOXC13	chr12	+	53938765	53946544	2423	protein_coding	homeobox_C13
ENSG00000134013	52.2851432859345	3556.77732349891	6.08444920788943	1.47821604123609e-30	1.41646060453079e-28	LOXL2	chr8	-	23297189	23425328	5707	protein_coding	lysyl_oxidase_like_2
ENSG00000056998	621.993976177385	1.38777878078145e-17	-12.2864156984487	1.53908913613304e-30	1.46966980322203e-28	GYG2	chrX	+	2828788	2882818	3646	protein_coding	glycogenin_2
ENSG00000119866	1.38777878078145e-17	545.022824794326	12.0958365341728	1.54476445383901e-30	1.46998502577947e-28	BCL11A	chr2	-	60451167	60553567	8375	protein_coding	B-cell_CLL/lymphoma_11A_(zinc_finger_protein)
ENSG00000185442	1925.6271300982	22.8981358637006	-6.38669737312612	1.6227311476105e-30	1.53885273415297e-28	FAM174B	chr15	-	92617443	92809884	4657	protein_coding	family_with_sequence_similarity_174_member_B
ENSG00000124920	18.3410849555724	1633.96337805875	6.46694460364543	1.92048096183465e-30	1.81495350279776e-28	MYRF	chr11	+	61752642	61788518	10680	protein_coding	myelin_regulatory_factor
ENSG00000099810	8.2495612111708	1060.60729170601	6.98367957821422	1.93397553263251e-30	1.82144729873037e-28	MTAP	chr9	+	21802543	21937651	14617	protein_coding	methylthioadenosine_phosphorylase
ENSG00000240280	1.38777878078145e-17	539.572671845992	12.0813402935959	2.00256678450058e-30	1.87961055087203e-28	TCAM1P	chr17	+	63849292	63864379	3546	unitary_pseudogene	testicular_cell_adhesion_molecule_1_pseudogene
ENSG00000117525	20.1759022113556	1738.60631391259	6.41987497497999	2.15848228297989e-30	2.01906194776292e-28	F3	chr1	-	94529225	94541800	2875	protein_coding	coagulation_factor_III_(thromboplastin_tissue_factor)
ENSG00000112319	1.38777878078145e-17	536.302580076581	12.0725721139146	2.28239805206505e-30	2.12773657050308e-28	EYA4	chr6	+	133240598	133532120	8968	protein_coding	EYA_transcriptional_coactivator_and_phosphatase_4
ENSG00000020633	0.9101298099858	534.122518896801	9.0020673381514	2.49130433115553e-30	2.31464055442933e-28	RUNX3	chr1	-	24899511	24965121	4523	protein_coding	runt-related_transcription_factor_3
ENSG00000160321	1.38777878078145e-17	531.942457716878	12.060797691553	2.72016916531776e-30	2.51876674125938e-28	ZNF208	chr19	-	21932958	22010949	6867	protein_coding	zinc_finger_protein_208
ENSG00000126005	16.5062667383555	1492.25940240276	6.48699991565359	3.0444345463109e-30	2.80956357241933e-28	MMP24-AS1	chr20	-	35201745	35278131	5511	protein_coding	MMP24_antisense_RNA_1
ENSG00000204264	1.82754864465077	603.884476587755	8.26803470397687	3.31420547073121e-30	3.03680931289096e-28	PSMB8	chr6	-	32840717	32844703	2006	protein_coding	proteasome_subunit_beta_8
ENSG00000153976	3.66244545564338	736.868208174422	7.60171179937408	3.32380496411105e-30	3.03680931289096e-28	HS3ST3A1	chr17	-	13495689	13601927	2628	protein_coding	heparan_sulfate-glucosamine_3-sulfotransferase_3A1
ENSG00000167183	734.834847846432	2.18769296388965	-8.31701910163349	3.32380496411105e-30	3.03680931289096e-28	PRR15L	chr17	-	47951967	47957878	1519	protein_coding	proline_rich_15-like
ENSG00000235750	668.781654706876	1.09771269193672	-9.10523228703109	3.490073458294e-30	3.17816258862726e-28	KIAA0040	chr1	-	175156987	175192999	4783	protein_coding	KIAA0040
ENSG00000137962	80.7247277137018	4920.40558032445	5.9273090284312	3.69605877747097e-30	3.35463077357192e-28	ARHGAP29	chr1	-	94148988	94275068	15524	protein_coding	Rho_GTPase_activating_protein_29
ENSG00000100979	19.258493690133	1639.4135309681	6.40182232125777	4.0171109503645e-30	3.63403185019652e-28	PLTP	chr20	-	45898621	45912155	2541	protein_coding	phospholipid_transfer_protein
ENSG00000174607	1.82754864465077	598.434323647304	8.25495758607683	4.19121786766974e-30	3.77910434684543e-28	UGT8	chr4	+	114598455	114678224	4699	protein_coding	UDP_glycosyltransferase_8
ENSG00000013297	1.82754864465077	597.344293059138	8.25232787779276	4.35940467614397e-30	3.91790810453056e-28	CLDN11	chr3	+	170418865	170860380	6032	protein_coding	claudin_11
ENSG00000145703	0.9101298099858	521.042151815092	8.96630464997616	4.43567111714032e-30	3.97346551767023e-28	IQGAP2	chr5	+	76403249	76708132	7904	protein_coding	IQ_motif_containing_GTPase_activating_protein_2
ENSG00000129682	5.49730390528178	844.781236102756	7.2297628968835	5.04057668467748e-30	4.50067855212063e-28	FGF13	chrX	-	138614731	139222777	20627	protein_coding	fibroblast_growth_factor_13
ENSG00000146373	0.9101298099858	517.772060043827	8.95722372257141	5.07697451155213e-30	4.5185073152814e-28	RNF217	chr6	+	124962545	125092633	12779	protein_coding	ring_finger_protein_217
ENSG00000159217	44.9458932465692	2947.45022866245	6.03097646766403	5.46203819047817e-30	4.84553265407549e-28	IGF2BP1	chr17	+	48997412	49055650	9109	protein_coding	insulin_like_growth_factor_2_mRNA_binding_protein_1
ENSG00000072858	1341.23985506647	13.0878609931684	-6.66649103455096	5.87948661642991e-30	5.19909200766685e-28	SIDT1	chr3	+	113532296	113629578	8060	protein_coding	SID1_transmembrane_family_member_1
ENSG00000135480	154.117179649008	8665.75065629927	5.81201440548304	6.34506781028989e-30	5.5928112131661e-28	KRT7	chr12	+	52232520	52252186	4093	protein_coding	keratin_7_type_II
ENSG00000134240	583.462946756758	1.38777878078145e-17	-12.1941762620671	6.74807850933246e-30	5.92903856502083e-28	HMGCS2	chr1	-	119747996	119768905	2571	protein_coding	3-hydroxy-3-methylglutaryl-CoA_synthase_2_(mitochondrial)
ENSG00000132688	26.5977574016326	1971.87285838477	6.20508652779413	7.04163674862508e-30	6.16726280967957e-28	NES	chr1	-	156668763	156677397	5558	protein_coding	nestin
ENSG00000116983	1.82754864465077	579.903803644899	8.20958727453108	8.59204909167529e-30	7.50126800222737e-28	HPCAL4	chr1	-	39678648	39691689	4962	protein_coding	hippocalcin_like_4
ENSG00000185760	0.9101298099858	505.781723546174	8.92342923898169	8.77825372032292e-30	7.61548124803157e-28	KCNQ5	chr6	+	72621792	73198851	7570	protein_coding	potassium_channel_voltage_gated_KQT-like_subfamily_Q_member_5
ENSG00000188848	1.38777878078145e-17	505.781723546174	11.9880588155133	8.77825372032292e-30	7.61548124803157e-28	BEND4	chr4	-	42110938	42152878	8765	protein_coding	BEN_domain_containing_4
ENSG00000112852	643.094301795232	1.09771269193672	-9.04873864527691	8.85845842787242e-30	7.6608951328591e-28	PCDHB2	chr5	+	141094578	141098703	4126	protein_coding	protocadherin_beta_2
ENSG00000108679	160.539018571025	8847.78576330477	5.78315863574634	9.02029919496729e-30	7.7764027636613e-28	LGALS3BP	chr17	-	78971238	78980109	3584	protein_coding	lectin_galactoside-binding_soluble_3_binding_protein
ENSG00000168702	1837.55620641946	22.8981358637006	-6.3191620992225	9.89536510308839e-30	8.50413861562606e-28	LRP1B	chr2	-	140231423	142131701	17042	protein_coding	LDL_receptor_related_protein_1B
ENSG00000106066	5.49730390528178	820.800563239157	7.18822266430576	9.97670870181769e-30	8.54733538967876e-28	CPVL	chr7	-	28995231	29195451	3340	protein_coding	carboxypeptidase_vitellogenic-like
ENSG00000153956	0.9101298099858	503.601662364256	8.91719882270614	1.00851391134303e-29	8.6133978496412e-28	CACNA2D1	chr7	-	81946444	82443798	9010	protein_coding	calcium_channel_voltage-dependent_alpha_2/delta_subunit_1
ENSG00000115232	4.57987785670322	759.758850472007	7.33341380639388	1.09523970893268e-29	9.32513536698383e-28	ITGA4	chr2	+	181457202	181536187	7901	protein_coding	integrin_subunit_alpha_4
ENSG00000166923	1.38777878078145e-17	501.421601182172	11.9755709595694	1.10675408594063e-29	9.394087690572e-28	GREM1	chr15	+	32717974	32745107	14606	protein_coding	gremlin_1_DAN_family_BMP_antagonist
ENSG00000109861	40.3588610654512	2656.41206348393	6.03581961175372	1.11025412566249e-29	9.39479960302898e-28	CTSC	chr11	-	88293592	88337787	11421	protein_coding	cathepsin_C
ENSG00000188641	1.38777878078145e-17	499.241539999918	11.9692862610677	1.21498540519103e-29	1.02494827080241e-27	DPYD	chr1	-	97077743	97921049	6443	protein_coding	dihydropyrimidine_dehydrogenase
ENSG00000104368	17.4236759818468	1456.28839319329	6.37436640915339	1.3059683716084e-29	1.09833138188387e-27	PLAT	chr8	-	42175233	42207724	6618	protein_coding	plasminogen_activator_tissue
ENSG00000172985	0.9101298099858	497.061478817494	8.89834448867025	1.33426718102222e-29	1.11870980930768e-27	SH3RF3	chr2	+	109129348	109504632	5803	protein_coding	SH3_domain_containing_ring_finger_3
ENSG00000125618	79.8073219103927	4605.38674242728	5.84831903083223	1.39466573058982e-29	1.16579642118391e-27	PAX8	chr2	-	113215997	113278950	7400	protein_coding	paired_box_8
ENSG00000180914	47.6981121943183	2973.61096261017	5.95822451761548	1.5517394761175e-29	1.29316325250629e-27	OXTR	chr3	-	8750408	8769628	4514	protein_coding	oxytocin_receptor
ENSG00000162777	1126.56697832739	10.9078032090939	-6.67519953174819	1.64078061507364e-29	1.36323588202841e-27	DENND2D	chr1	-	111187174	111204535	5515	protein_coding	DENN/MADD_domain_containing_2D
ENSG00000120675	562.362621101984	1.38777878078145e-17	-12.1410481216797	1.65551975678775e-29	1.37133882022349e-27	DNAJC15	chr13	+	43023203	43114224	8042	protein_coding	DnaJ_heat_shock_protein_family_(Hsp40)_member_C15
ENSG00000112246	10.0843900675811	1072.59762812153	6.71429251900264	1.79235222838733e-29	1.48022458356997e-27	SIM1	chr6	-	100385015	100464929	9274	protein_coding	single-minded_family_bHLH_transcription_factor_1
ENSG00000243137	1.82754864465077	559.193222456155	8.15713132728757	2.03939179860254e-29	1.6792010135739e-27	PSG4	chr19	-	43192702	43207299	6274	protein_coding	pregnancy_specific_beta-1-glycoprotein_4
ENSG00000169908	9.16697626675744	1012.64594603786	6.76706860956555	2.10319910732746e-29	1.72656951195858e-27	TM4SF1	chr3	-	149369022	149377865	3668	protein_coding	transmembrane_4_L_six_family_member_1
ENSG00000122862	2.74500333963777	619.144904817765	7.74996437104435	2.33097032225505e-29	1.902196285826e-27	SRGN	chr10	+	69088106	69104811	1220	protein_coding	serglycin
ENSG00000115295	2.74500333963777	619.144904817765	7.74996437104435	2.33097032225505e-29	1.902196285826e-27	CLIP4	chr2	+	29097705	29189643	7775	protein_coding	CAP-Gly_domain_containing_linker_protein_family_member_4
ENSG00000164236	2.74500333963777	616.964843642334	7.74487651957929	2.51502186474816e-29	2.04632000894791e-27	ANKRD33B	chr5	+	10564330	10657816	9783	protein_coding	ankyrin_repeat_domain_33B
ENSG00000005471	37.6066413200733	2396.98478514061	5.98912325324975	3.09658563518145e-29	2.51207084227507e-27	ABCB4	chr7	-	87401697	87480435	7494	protein_coding	ATP_binding_cassette_subfamily_B_member_4
ENSG00000183486	13.7540369826991	1200.13120632748	6.43359750094478	3.20073271255588e-29	2.58892206847057e-27	MX2	chr21	+	41361943	41409390	13047	protein_coding	MX_dynamin-like_GTPase_2
ENSG00000108821	599.058839622746	29631.3988482762	5.62797435598586	3.37688359425313e-29	2.72339225001628e-27	COL1A1	chr17	-	50183289	50201632	9819	protein_coding	collagen_type_I_alpha_1
ENSG00000198947	0.9101298099858	476.350897575505	8.83695965596401	3.64550096401078e-29	2.93143046816551e-27	DMD	chrX	-	31097677	33339441	18910	protein_coding	dystrophin
ENSG00000142552	10.0843900675811	1038.80668003991	6.668115865818	3.76585994015601e-29	3.0193852540592e-27	RCN3	chr19	+	49527618	49546962	2093	protein_coding	reticulocalbin_3
ENSG00000145335	1.38777878078145e-17	475.260866983351	11.8982849526454	3.82814129286901e-29	3.06039865392996e-27	SNCA	chr4	-	89724099	89838315	4014	protein_coding	synuclein_alpha
ENSG00000041982	1.82754864465077	543.932794204726	8.11722132953705	3.85320823626601e-29	3.06263236143212e-27	TNC	chr9	-	115019578	115118257	9636	protein_coding	tenascin_C
ENSG00000144583	1.82754864465077	543.932794204726	8.11722132953705	3.85320823626601e-29	3.06263236143212e-27	MARCH4	chr2	-	216257865	216372027	4447	protein_coding	membrane_associated_ring-CH-type_finger_4
ENSG00000164938	6246.6068201667	116.64079295852	-5.74151213496929	3.89311770249274e-29	3.08543602121766e-27	TP53INP1	chr8	-	94925972	94949411	5676	protein_coding	tumor_protein_p53_inducible_nuclear_protein_1
ENSG00000169994	1.82754864465077	542.842763615094	8.11432791940713	4.02250320794252e-29	3.17239948284032e-27	MYO7B	chr2	+	127535802	127637729	8800	protein_coding	myosin_VIIB
ENSG00000169213	51.3677371113988	3051.00313387141	5.8886439654041	4.02591694669747e-29	3.17239948284032e-27	RAB3B	chr1	-	51907956	51990764	12844	protein_coding	RAB3B_member_RAS_oncogene_family
ENSG00000149212	22.0107186986201	1586.00203245501	6.16255423933054	4.09619777087235e-29	3.21855813990744e-27	SESN3	chr11	-	95165513	95232541	10573	protein_coding	sestrin_3
ENSG00000108798	1.82754864465077	540.662702435726	8.10852363202535	4.38470992969224e-29	3.43543896799049e-27	ABI3	chr17	+	49210227	49223225	2456	protein_coding	ABI_family_member_3
ENSG00000130300	0.9101298099858	468.720683429384	8.8136691746318	5.14341846968887e-29	4.01844179928732e-27	PLVAP	chr19	-	17351448	17377350	2305	protein_coding	plasmalemma_vesicle_associated_protein
ENSG00000120875	6740.17095451624	128.631130723838	-5.71018976342652	5.28738305396584e-29	4.11921590275112e-27	DUSP4	chr8	-	29333064	29350668	7257	protein_coding	dual_specificity_phosphatase_4
ENSG00000170075	867.858639384398	6.54770241941083	-7.02499040786647	5.35646937583097e-29	4.16125040408835e-27	GPR37L1	chr1	+	202122858	202133592	6588	protein_coding	G_protein-coupled_receptor_37_like_1
ENSG00000182326	8.2495612111708	918.903315835651	6.77679852491591	5.73931164289639e-29	4.4461073096139e-27	C1S	chr12	+	6988259	7071032	6462	protein_coding	complement_component_1_s_subcomponent
ENSG00000186472	11.0018028728265	1018.09609895521	6.51500116684289	6.11155384058995e-29	4.72117534185574e-27	PCLO	chr7	-	82754013	83162930	22873	protein_coding	piccolo_presynaptic_cytomatrix_protein
ENSG00000114450	46.7807059051215	2753.42478521233	5.87518106641421	6.4836130139193e-29	4.99456138643683e-27	GNB4	chr3	-	179396089	179451590	7035	protein_coding	guanine_nucleotide_binding_protein_(G_protein)_beta_polypeptide_4
ENSG00000183876	1.38777878078145e-17	464.360561059054	11.864819120123	6.59642246220722e-29	5.06726855120561e-27	ARSI	chr5	-	150296343	150339307	3269	protein_coding	arylsulfatase_family_member_I
ENSG00000175445	1.38777878078145e-17	462.180499873575	11.8580317790784	7.29178898958176e-29	5.58583534825872e-27	LPL	chr8	+	19901717	19967258	4382	protein_coding	lipoprotein_lipase
ENSG00000157510	1.82754864465077	527.582335356604	8.07319879625497	8.08595948608271e-29	6.17699921741002e-27	AFAP1L1	chr5	+	149271871	149341802	4721	protein_coding	actin_filament_associated_protein_1_like_1
ENSG00000104413	7516.29596874294	148.251683034498	-5.66278847048542	9.25018995188383e-29	7.04679983010408e-27	ESRP1	chr8	+	94641074	94707466	4875	protein_coding	epithelial_splicing_regulatory_protein_1
ENSG00000123572	17.4236759818468	1333.1149373986	6.24688220352618	1.06813626492423e-28	8.11458989549202e-27	NRK	chrX	+	105822543	105958610	9573	protein_coding	Nik_related_kinase
ENSG00000170955	1.38777878078145e-17	454.550285722705	11.8340214219348	1.09320886806151e-28	8.28218652357014e-27	PRKCDBP	chr11	-	6318946	6320647	1672	protein_coding	protein_kinase_C_delta_binding_protein
ENSG00000152192	0.9101298099858	453.460255129503	8.76592894001659	1.15050493032888e-28	8.69231760686116e-27	POU4F1	chr13	-	78598362	78603560	4547	protein_coding	POU_class_4_homeobox_1
ENSG00000173905	575.206297589288	1.09771269193672	-8.88782261024789	1.20955865891277e-28	9.11344456952334e-27	GOLIM4	chr3	-	168008677	168095975	4647	protein_coding	golgi_integral_membrane_protein_4
ENSG00000166396	1.38777878078145e-17	451.280193942931	11.8236076695054	1.27466379941348e-28	9.57774020428145e-27	SERPINB7	chr18	+	63752935	63805376	2637	protein_coding	serpin_peptidase_inhibitor_clade_B_(ovalbumin)_member_7
ENSG00000064787	1130.23660015349	11.9978317798155	-6.54386946755784	1.27869844005373e-28	9.5818762397596e-27	BCAS1	chr20	-	53936777	54070594	8186	protein_coding	breast_carcinoma_amplified_sequence_1
ENSG00000196208	16099.5413976068	339.007042434364	-5.56907447166149	1.45266792230123e-28	1.08559294921756e-26	GREB1	chr2	+	11482341	11642788	12361	protein_coding	growth_regulation_by_estrogen_in_breast_cancer_1
ENSG00000168350	1219.22492941892	14.1778906812214	-6.41447202726328	1.45807483519751e-28	1.08668065156549e-26	DEGS2	chr14	-	100143957	100160163	4466	protein_coding	delta(4)-desaturase_sphingolipid_2
ENSG00000143631	1.38777878078145e-17	445.830040975497	11.8060826108115	1.64994154626307e-28	1.2263524990211e-26	FLG	chr1	-	152302175	152325203	12747	protein_coding	filaggrin
ENSG00000134802	0.9101298099858	444.740010381835	8.73792233079172	1.73789152207667e-28	1.28824136788762e-26	SLC43A3	chr11	-	57406954	57427580	4517	protein_coding	solute_carrier_family_43_member_3
ENSG00000182575	2218.27947019114	35.9785092207799	-5.94156198350861	1.93290655863891e-28	1.42894793734217e-26	NXPH3	chr17	+	49575858	49583827	5648	protein_coding	neurexophilin_3
ENSG00000159403	27.515164803161	1762.58698671088	5.99453909369976	1.94379427967052e-28	1.42988474438633e-26	C1R	chr12	-	7080209	7092607	5672	protein_coding	complement_component_1_r_subcomponent
ENSG00000086548	618.324354329625	2.18769296388965	-8.0680115123539	1.94457254063666e-28	1.42988474438633e-26	CEACAM6	chr19	+	41750977	41772208	3052	protein_coding	carcinoembryonic_antigen-related_cell_adhesion_molecule_6_(non-specific_cross_reacting_antigen)
ENSG00000142871	192.648212491442	9218.39616080023	5.57950916473965	2.00226916523127e-28	1.46838411501401e-26	CYR61	chr1	+	85580761	85583962	2455	protein_coding	cysteine-rich_angiogenic_inducer_61
ENSG00000038002	499.979049500229	1.38777878078145e-17	-11.9714571306778	2.50709655983298e-28	1.83371442797784e-26	AGA	chr4	-	177430770	177442503	2675	protein_coding	aspartylglucosaminidase
ENSG00000186854	1.82754864465077	500.331570591066	7.99670444670997	2.75083305635322e-28	2.0066488032565e-26	TRABD2A	chr2	-	84821650	84907008	8771	protein_coding	TraB_domain_containing_2A
ENSG00000197928	0.9101298099858	436.01976563037	8.70936125617312	2.78706181781927e-28	2.02769807015471e-26	ZNF677	chr19	-	53235381	53254898	9348	protein_coding	zinc_finger_protein_677
ENSG00000100342	3.66244545564338	608.244598939668	7.32500522794072	3.07227614206029e-28	2.22930517632718e-26	APOL1	chr22	+	36253010	36267530	3519	protein_coding	apolipoprotein_L1
ENSG00000107317	0.9101298099858	432.749673847547	8.69850337655059	3.26882573633859e-28	2.3656835940802e-26	PTGDS	chr9	+	136977505	136985435	2378	protein_coding	prostaglandin_D2_synthase
ENSG00000101282	3.66244545564338	606.064537763761	7.31982605118128	3.31835137153252e-28	2.39522260022351e-26	RSPO4	chr20	-	958452	1002264	2710	protein_coding	R-spondin_4
ENSG00000115935	3.66244545564338	604.97450717577	7.31722947373926	3.4489918936754e-28	2.48300330020857e-26	WIPF1	chr2	-	174559572	174682916	9121	protein_coding	WAS/WASL_interacting_protein_family_member_1
ENSG00000137747	1080.69670549562	11.9978317798155	-6.47921403688065	3.64617979715036e-28	2.61810941518099e-26	TMPRSS13	chr11	-	117900643	117929459	5367	protein_coding	transmembrane_protease_serine_13
ENSG00000085831	2858.62847750176	52.3289748806695	-5.76841278506425	3.94700370631306e-28	2.82298712336623e-26	TTC39A	chr1	-	51287258	51345116	9362	protein_coding	tetratricopeptide_repeat_domain_39A
ENSG00000019582	9.16697626675744	893.832612400838	6.58703750433482	3.95203826223047e-28	2.82298712336623e-26	CD74	chr5	-	150401637	150412929	3184	protein_coding	CD74_molecule_major_histocompatibility_complex_class_II_invariant_chain
ENSG00000067445	2.74500333963777	547.202885973425	7.57179895007973	4.20596794880152e-28	2.99658871917074e-26	TRO	chrX	+	54920462	54931431	6716	protein_coding	trophinin
ENSG00000131094	25.6803498996692	1608.89267467532	5.96199342539109	4.71075249890975e-28	3.34755567112447e-26	C1QL1	chr17	-	44959693	44968071	1295	protein_coding	complement_component_1_q_subcomponent-like_1
ENSG00000185070	1.38777878078145e-17	425.119459685364	11.7374755195982	5.02614079122052e-28	3.56247159534421e-26	FLRT2	chr14	+	85530144	85654426	34899	protein_coding	fibronectin_leucine_rich_transmembrane_protein_2
ENSG00000171564	485.300562038368	1.38777878078145e-17	-11.9284794891232	5.07083057465141e-28	3.58490775407425e-26	FGB	chr4	+	154562956	154571086	2708	protein_coding	fibrinogen_beta_chain
ENSG00000110436	483.465751104824	1.38777878078145e-17	-11.9230161332816	5.57860843330214e-28	3.93377719292928e-26	SLC1A2	chr11	-	35251206	35420063	12331	protein_coding	solute_carrier_family_1_(glial_high_affinity_glutamate_transporter)_member_2
ENSG00000174080	12.8366262054278	1012.64594603786	6.28717298901035	6.4723203767192e-28	4.55230901995281e-26	CTSF	chr11	-	66563463	66568841	2896	protein_coding	cathepsin_F
ENSG00000189143	4779.67549888186	98.110270460225	-5.60468465557391	6.49296116656404e-28	4.55517665922647e-26	CLDN4	chr7	+	73799542	73832693	4702	protein_coding	claudin_4
ENSG00000184731	418.329962825221	1.38777878078145e-17	-11.7143048418771	6.60185558595862e-28	4.619787034846e-26	FAM110C	chr2	-	38814	46870	3968	protein_coding	family_with_sequence_similarity_110_member_C
ENSG00000147027	1.38777878078145e-17	417.489245519879	11.7113535099628	7.78663980080968e-28	5.4350350548748e-26	TMEM47	chrX	-	34627064	34657288	4054	protein_coding	transmembrane_protein_47
ENSG00000101445	1.38777878078145e-17	416.39921492453	11.707582882343	8.22906251676464e-28	5.72930248793783e-26	PPP1R16B	chr20	+	38805705	38923024	6400	protein_coding	protein_phosphatase_1_regulatory_subunit_16B
ENSG00000152495	0.9101298099858	415.30918432911	8.63917279744973	8.69768794482649e-28	6.04028071138064e-26	CAMK4	chr5	+	111223653	111494886	13910	protein_coding	calcium/calmodulin-dependent_protein_kinase_IV
ENSG00000095627	524.748997067954	1.09771269193672	-8.75540234123484	1.00065550391988e-27	6.93174483962233e-26	TDRD1	chr10	+	114179270	114232304	5256	protein_coding	tudor_domain_containing_1
ENSG00000167077	10.0843900675811	889.472490063926	6.44423783843793	1.49862973356745e-27	1.03552302268438e-25	MEI1	chr22	+	41699499	41799456	5393	protein_coding	meiotic_double-stranded_break_formation_protein_1
ENSG00000164484	1.38777878078145e-17	405.498908967026	11.6693244610955	1.52375911710117e-27	1.04762248698498e-25	TMEM200A	chr6	+	130365734	130443063	6137	protein_coding	transmembrane_protein_200A
ENSG00000197343	0.9101298099858	405.498908967026	8.60469488456389	1.52375911710117e-27	1.04762248698498e-25	ZNF655	chr7	+	99558406	99576453	8401	protein_coding	zinc_finger_protein_655
ENSG00000233608	0.9101298099858	404.408878370862	8.60081264402011	1.61276373842717e-27	1.1032988947882e-25	TWIST2	chr2	+	238848032	238910543	1878	protein_coding	twist_family_bHLH_transcription_factor_2
ENSG00000259937	401.816664336656	1.38777878078145e-17	-11.6562195319674	1.61276373842717e-27	1.1032988947882e-25	RP11-438D14.2	chr12	-	33404872	33405896	1025	sense_intronic	NA
ENSG00000147257	5.49730390528178	659.476036547473	6.8725614809574	1.75787618080147e-27	1.1995869193107e-25	GPC3	chrX	-	133535745	133985895	2711	protein_coding	glypican_3
ENSG00000248663	399.981853391939	1.38777878078145e-17	-11.6496188475782	1.80737492499178e-27	1.23031232208413e-25	LINC00992	chr5	+	117415509	117546298	1144	lincRNA	long_intergenic_non-protein_coding_RNA_992
ENSG00000125355	1.82754864465077	460.000438687884	7.87548476933511	1.89853657740841e-27	1.28917665222984e-25	TMEM255A	chrX	-	120258650	120311556	3858	protein_coding	transmembrane_protein_255A
ENSG00000172346	1.38777878078145e-17	401.138786581903	11.6537324207452	1.91369109705012e-27	1.29626647438363e-25	CSDC2	chr22	+	41560763	41577741	3250	protein_coding	cold_shock_domain_containing_C2_RNA_binding
ENSG00000077935	6.41472570341761	699.807168250688	6.74035853782162	2.06916512431233e-27	1.39813538289222e-25	SMC1B	chr22	-	45344063	45413619	4253	protein_coding	structural_maintenance_of_chromosomes_1B
ENSG00000170561	455.943587078009	1.38777878078145e-17	-11.8384814491405	2.09950899037941e-27	1.41516168491236e-25	IRX2	chr5	-	2745845	2751662	3384	protein_coding	iroquois_homeobox_2
ENSG00000238266	1.38777878078145e-17	398.958725388868	11.6458727497812	2.14629773603765e-27	1.44316220143696e-25	LINC00707	chr10	+	6779598	6842906	3070	lincRNA	long_intergenic_non-protein_coding_RNA_707
ENSG00000174963	393.560015082848	1.38777878078145e-17	-11.6262756873562	2.55181110515786e-27	1.71164285860845e-25	ZIC4	chr3	-	147386046	147406860	8568	protein_coding	Zic_family_member_4
ENSG00000188517	1.82754864465077	454.550285722705	7.85829383613695	2.57067087304802e-27	1.71592280775955e-25	COL25A1	chr4	-	108810721	109302657	6653	protein_coding	collagen_type_XXV_alpha_1
ENSG00000143556	452.273965204179	1.38777878078145e-17	-11.8268264402677	2.57067087304802e-27	1.71592280775955e-25	S100A7	chr1	-	153457744	153460701	536	protein_coding	S100_calcium_binding_protein_A7
ENSG00000091656	2.74500333963777	504.691692955236	7.45515143040281	2.69150955373558e-27	1.79223254811821e-25	ZFHX4	chr8	+	76681219	76867285	15687	protein_coding	zinc_finger_homeobox_4
ENSG00000139970	0.9101298099858	392.41854180781	8.55740393481676	3.22015211744467e-27	2.13391333450231e-25	RTN1	chr14	-	59595976	59870966	6209	protein_coding	reticulon_1
ENSG00000105556	389.890393190085	1.38777878078145e-17	-11.6127651761197	3.22015211744467e-27	2.13391333450231e-25	MIER2	chr19	-	301444	344807	7931	protein_coding	mesoderm_induction_early_response_1_family_member_2
ENSG00000167608	2085.25567924785	39.2486025160081	-5.72723456641772	3.47572485596971e-27	2.29773820346209e-25	TMC4	chr19	-	54160108	54173250	3062	protein_coding	transmembrane_channel_like_4
ENSG00000168685	3.66244545564338	547.202885973425	7.17246041512883	3.61000863322098e-27	2.38078770796667e-25	IL7R	chr5	+	35852695	35879603	6060	protein_coding	interleukin_7_receptor
ENSG00000105889	1.38777878078145e-17	390.238480613456	11.6139987493401	3.62030488915441e-27	2.38186614250324e-25	STEAP1B	chr7	-	22419444	22632925	2316	protein_coding	STEAP_family_member_1B
ENSG00000184860	385.303365822166	1.38777878078145e-17	-11.5956971468407	4.32014271603117e-27	2.83551896977502e-25	SDR42E1	chr16	-	81988855	82011488	11911	protein_coding	short_chain_dehydrogenase/reductase_family_42E_member_1
ENSG00000120322	439.430288638482	1.38777878078145e-17	-11.7852760570487	5.02151314905019e-27	3.28801507409593e-25	PCDHB8	chr5	+	141177790	141180529	2740	protein_coding	protocadherin_beta_8
ENSG00000113205	437.595477699562	1.38777878078145e-17	-11.7792413811344	5.2908914616437e-27	3.456171165954e-25	PCDHB3	chr5	+	141100473	141103827	3355	protein_coding	protocadherin_beta_3
ENSG00000151892	5304.43141870176	122.090946514791	-5.43982368245701	5.67924995359966e-27	3.70106760601764e-25	GFRA1	chr10	-	116056925	116273467	9678	protein_coding	GDNF_family_receptor_alpha_1
ENSG00000100385	1.82754864465077	438.199826818604	7.80545669878061	5.87570729209157e-27	3.82004317351797e-25	IL2RB	chr22	-	37125838	37175054	4700	protein_coding	interleukin_2_receptor_subunit_beta
ENSG00000165300	11.0018028728265	837.151022010306	6.23272306737933	6.16983764305608e-27	3.99794202336313e-25	SLITRK5	chr13	+	87672615	87696272	21103	protein_coding	SLIT_and_NTRK_like_family_member_5
ENSG00000183837	4.57987785670322	579.903803644899	6.94375472767766	6.18818720636868e-27	3.99794202336313e-25	PNMA3	chrX	+	153056409	153060467	3748	protein_coding	paraneoplastic_Ma_antigen_3
ENSG00000120149	434.843261290713	1.38777878078145e-17	-11.7701417718653	6.19295044526633e-27	3.99794202336313e-25	MSX2	chr5	+	174724533	174730893	2270	protein_coding	msh_homeobox_2
ENSG00000253125	433.92585582097	1.38777878078145e-17	-11.7670957695744	6.52804582483018e-27	4.19457449132371e-25	RP11-459E5.1	chr8	+	22690150	22798616	2191	processed_transcript	NA
ENSG00000078596	1.82754864465077	436.01976563037	7.79826324690689	6.52804582483018e-27	4.19457449132371e-25	ITM2A	chrX	-	79360384	79367667	2051	protein_coding	integral_membrane_protein_2A
ENSG00000159166	1592.6089498893	28.3482913321216	-5.80616140639101	6.86785062584887e-27	4.4026284396613e-25	LAD1	chr1	-	201373244	201399915	3482	protein_coding	ladinin_1
ENSG00000186310	1.38777878078145e-17	378.24814403824	11.5689894152678	7.39721305416495e-27	4.73094781866489e-25	NAP1L3	chrX	-	93670930	93673568	2639	protein_coding	nucleosome_assembly_protein_1-like_3
ENSG00000138696	1542.15164984392	27.258260206801	-5.81604895050653	8.18249598474751e-27	5.21687187513546e-25	BMPR1B	chr4	+	94757968	95158448	6312	protein_coding	bone_morphogenetic_protein_receptor_type_IB
ENSG00000144452	525.666402532886	2.18769296388965	-7.83384926620585	8.19493345717799e-27	5.21687187513546e-25	ABCA12	chr2	-	214931542	215138428	9416	protein_coding	ATP_binding_cassette_subfamily_A_member_12
ENSG00000135636	4.57987785670322	571.183558935138	6.9219000229092	8.8983356085712e-27	5.65157338501886e-25	DYSF	chr2	+	71453722	71686768	8386	protein_coding	dysferlin
ENSG00000140678	1.38777878078145e-17	373.8880216445	11.5522678665282	9.4300185885184e-27	5.96172278627229e-25	ITGAX	chr16	+	31355134	31382997	7074	protein_coding	integrin_subunit_alpha_X
ENSG00000016402	371.542283704559	1.38777878078145e-17	-11.5432469915066	9.4300185885184e-27	5.96172278627229e-25	IL20RA	chr6	-	136999971	137045180	4730	protein_coding	interleukin_20_receptor_subunit_alpha
ENSG00000170819	425.669206590356	1.38777878078145e-17	-11.7393884201336	9.99138109121285e-27	6.29374102501645e-25	BFSP2	chr3	+	133399995	133475222	2070	protein_coding	beaded_filament_structural_protein_2
ENSG00000198286	0.9101298099858	372.797991045825	8.4834274433627	1.00238484744453e-26	6.29374102501645e-25	CARD11	chr7	-	2906141	3043945	4707	protein_coding	caspase_recruitment_domain_family_member_11
ENSG00000180767	1.38777878078145e-17	372.797991045825	11.5480570198943	1.00238484744453e-26	6.29374102501645e-25	CHST13	chr3	+	126524283	126543291	1789	protein_coding	carbohydrate_(chondroitin_4)_sulfotransferase_13
ENSG00000178163	1.38777878078145e-17	371.707960447054	11.5438338469228	1.06566671912662e-26	6.67583153592283e-25	ZNF518B	chr4	-	10439874	10457410	10905	protein_coding	zinc_finger_protein_518B
ENSG00000104361	2178.83103563678	44.6987578293512	-5.60349039780042	1.08814653399758e-26	6.8011631435153e-25	NIPAL2	chr8	-	98189833	98294393	5599	protein_coding	NIPA-like_domain_containing_2
ENSG00000171714	1.38777878078145e-17	370.617929848184	11.5395982752361	1.13311397983085e-26	7.06616044429209e-25	ANO5	chr11	+	22193176	22283357	6900	protein_coding	anoctamin_5
ENSG00000122870	1.38777878078145e-17	367.347838050978	11.5268164344778	1.45058002048709e-26	9.02543012294467e-25	BICC1	chr10	+	58513140	58831437	6569	protein_coding	BicC_family_RNA_binding_protein_1
ENSG00000007237	1.82754864465077	420.759337305502	7.74687903570802	1.45876359685237e-26	9.05585952077584e-25	GAS7	chr17	-	9910609	10198551	10100	protein_coding	growth_arrest_specific_7
ENSG00000204516	11.9192148715908	845.871266687354	6.13343588447295	1.48798640409227e-26	9.21646713940126e-25	MICB	chr6	+	31494881	31511124	2798	protein_coding	MHC_class_I_polypeptide-related_sequence_B
ENSG00000213445	51.3677371113988	2376.27420409542	5.52807733383773	1.54300562687598e-26	9.53577477409358e-25	SIPA1	chr11	+	65585395	65650930	4692	protein_coding	signal-induced_proliferation-associated_1
ENSG00000162069	1266.93001313644	21.808104855422	-5.8527560857692	1.6653423675834e-26	1.02687400114151e-24	CCDC64B	chr16	-	3027682	3036926	4690	protein_coding	coiled-coil_domain_containing_64B
ENSG00000130224	1.38777878078145e-17	364.077746252859	11.5139203374548	1.74861519096582e-26	1.07580909097877e-24	LRCH2	chrX	-	115110616	115234072	4929	protein_coding	leucine-rich_repeats_and_calponin_homology_(CH)_domain_containing_2
ENSG00000115380	11.0018028728265	800.089982125708	6.167406759577	1.777266121359e-26	1.09099543757799e-24	EFEMP1	chr2	-	55865967	55924139	3962	protein_coding	EGF_containing_fibulin-like_extracellular_matrix_protein_1
ENSG00000196126	29.3499793347138	1529.32044219231	5.69704679525024	1.86091710950501e-26	1.13980136811798e-24	HLA-DRB1	chr6	-	32552990	32589848	1304	protein_coding	major_histocompatibility_complex_class_II_DR_beta_1
ENSG00000274173	505.483482295578	2.18769296388965	-7.77738008943369	2.00158489572905e-26	1.22323524927654e-24	RP4-568C11.4	chr20	+	24931840	24932983	1144	lincRNA	NA
ENSG00000138193	13.7540369826991	913.453162915382	6.03985216036716	2.02830737307478e-26	1.23681776201617e-24	PLCE1	chr10	+	93993989	94332823	13329	protein_coding	phospholipase_C_epsilon_1
ENSG00000145908	0.9101298099858	360.807654453806	8.43627834653502	2.11085374047251e-26	1.28146994959679e-24	ZNF300	chr5	-	150894392	150904983	4411	protein_coding	zinc_finger_protein_300
ENSG00000227372	0.9101298099858	360.807654453806	8.43627834653502	2.11085374047251e-26	1.28146994959679e-24	TP73-AS1	chr1	-	3735601	3747336	7205	antisense	TP73_antisense_RNA_1
ENSG00000149418	3625.57943738775	85.0299011447181	-5.4121656981341	2.39398460090345e-26	1.45015353545035e-24	ST14	chr11	+	130159562	130210376	4350	protein_coding	suppression_of_tumorigenicity_14
ENSG00000121270	708.230089508298	7.63772441976772	-6.51326162465843	2.45893778055184e-26	1.4862252286364e-24	ABCC11	chr16	-	48166910	48247568	7245	protein_coding	ATP_binding_cassette_subfamily_C_member_11
ENSG00000173546	47.6981121943183	2180.06869944809	5.51040286550365	2.49223403535144e-26	1.50304667118859e-24	CSPG4	chr15	-	75674322	75712848	8290	protein_coding	chondroitin_sulfate_proteoglycan_4
ENSG00000175414	10.0843900675811	781.559462178727	6.25766969173382	3.11510631007225e-26	1.87458509044414e-24	ARL10	chr5	+	176365468	176401865	11459	protein_coding	ADP_ribosylation_factor_like_GTPase_10
ENSG00000160703	4.57987785670322	539.572671845992	6.83978016094461	3.38450216377079e-26	2.03225314423276e-24	NLRX1	chr11	+	119166568	119184016	5320	protein_coding	NLR_family_member_X1
ENSG00000049283	2398.09093931114	53.4190058528579	-5.48531133468947	3.65960333018059e-26	2.1926525312265e-24	EPN3	chr17	+	50532543	50543750	4642	protein_coding	epsin_3
ENSG00000205413	1.82754864465077	404.408878370862	7.68971463475388	3.74816261328067e-26	2.24083087017025e-24	SAMD9	chr7	-	93099513	93118023	6855	protein_coding	sterile_alpha_motif_domain_containing_9
ENSG00000148677	3.66244545564338	493.791387043532	7.02431960905458	3.81360883572417e-26	2.27501207356292e-24	ANKRD1	chr10	-	90912096	90921276	1979	protein_coding	ankyrin_repeat_domain_1_(cardiac_muscle)
ENSG00000089486	30.2673864777484	1518.42013637206	5.64251845545073	3.92239445342581e-26	2.33484350354249e-24	CDIP1	chr16	-	4510675	4538828	4268	protein_coding	cell_death-inducing_p53_target_1
ENSG00000115604	0.9101298099858	347.727287247748	8.38302227944964	4.85359575640916e-26	2.88291008416865e-24	IL18R1	chr2	+	102311529	102398775	4353	protein_coding	interleukin_18_receptor_1
ENSG00000179542	2.74500333963777	444.740010381835	7.27275636702229	4.97157440129291e-26	2.9466221467663e-24	SLITRK4	chrX	-	143622790	143635777	8914	protein_coding	SLIT_and_NTRK_like_family_member_4
ENSG00000124126	37220.0497621663	1039.89671062326	-5.16141062606276	5.3133133977414e-26	3.14239638174809e-24	PREX1	chr20	-	48624252	48827883	7393	protein_coding	phosphatidylinositol-345-trisphosphate-dependent_Rac_exchange_factor_1
ENSG00000077942	71.5506693429158	2959.44056505517	5.36762354860668	5.85766615766715e-26	3.45690293995718e-24	FBLN1	chr22	+	45502238	45601135	7285	protein_coding	fibulin_1
ENSG00000184905	1.38777878078145e-17	345.547226045131	11.4385815311595	5.90541068840263e-26	3.47018588337095e-24	TCEAL2	chrX	+	102125688	102127711	1666	protein_coding	transcription_elongation_factor_A_(SII)-like_2
ENSG00000186297	1.38777878078145e-17	345.547226045131	11.4385815311595	5.90541068840263e-26	3.47018588337095e-24	GABRA5	chr15	+	26866363	26949207	4154	protein_coding	gamma-aminobutyric_acid_(GABA)_A_receptor_alpha_5
ENSG00000257151	0.9101298099858	344.457195443644	8.36939531753355	6.30659347973429e-26	3.69803043254099e-24	PWAR6	chr15	+	25031873	25036490	4618	lincRNA	Prader_Willi/Angelman_region_RNA_6
ENSG00000196628	0.9101298099858	342.277134240303	8.36023863940902	7.1963207503301e-26	4.21076631818783e-24	TCF4	chr18	-	55222331	55664787	24564	protein_coding	transcription_factor_4
ENSG00000104133	1402.70602060186	27.258260206801	-5.67932921355192	7.53653459215097e-26	4.40047214052534e-24	SPG11	chr15	-	44562696	44663678	11853	protein_coding	spastic_paraplegia_11_(autosomal_recessive)
ENSG00000166313	15.5888571884922	934.163744011432	5.89314357804346	8.01158114369606e-26	4.66793417442342e-24	APBB1	chr11	-	6395124	6419414	5244	protein_coding	amyloid_beta_(A4)_precursor_protein-binding_family_B_member_1_(Fe65)
ENSG00000164120	1248.58190401524	22.8981358637006	-5.76171286298056	9.22010062512296e-26	5.36071854738915e-24	HPGD	chr4	-	174490177	174523154	5529	protein_coding	hydroxyprostaglandin_dehydrogenase_15-(NAD)
ENSG00000139737	1.38777878078145e-17	336.826981229774	11.4017189859127	1.004010073653e-25	5.82516477542851e-24	SLAIN1	chr13	+	77697854	77764242	4133	protein_coding	SLAIN_motif_family_member_1
ENSG00000234745	148.61274624081	5562.43359249675	5.22484103360344	1.03514203210872e-25	5.99314547895197e-24	HLA-B	chr6	-	31353872	31357188	3012	protein_coding	major_histocompatibility_complex_class_I_B
ENSG00000188549	62.3766100477061	2574.6597698906	5.3642602148944	1.04612718804734e-25	6.04402180640541e-24	C15orf52	chr15	-	40331452	40340967	7510	protein_coding	chromosome_15_open_reading_frame_52
ENSG00000079931	0.9101298099858	334.646920024667	8.32772470065809	1.14850548815273e-25	6.59395603960089e-24	MOXD1	chr6	-	132296055	132401545	5293	protein_coding	monooxygenase_DBH-like_1
ENSG00000145103	333.011253646692	1.38777878078145e-17	-11.3853505617786	1.14850548815273e-25	6.59395603960089e-24	ILDR1	chr3	-	121987323	122022204	2953	protein_coding	immunoglobulin-like_domain_containing_receptor_1
ENSG00000166341	0.9101298099858	334.646920024667	8.32772470065809	1.14850548815273e-25	6.59395603960089e-24	DCHS1	chr11	-	6621323	6655854	10765	protein_coding	dachsous_cadherin-related_1
ENSG00000118946	1.38777878078145e-17	331.37682821602	11.3781922416665	1.50617068378422e-25	8.6294166614062e-24	PCDH17	chr13	+	57631810	57729311	8326	protein_coding	protocadherin_17
ENSG00000072657	1.38777878078145e-17	329.196767009583	11.3686730569317	1.72674112530446e-25	9.83169931407825e-24	TRHDE	chr12	+	72087266	72670757	11950	protein_coding	thyrotropin-releasing_hormone_degrading_enzyme
ENSG00000273760	1.38777878078145e-17	329.196767009583	11.3686730569317	1.72674112530446e-25	9.83169931407825e-24	CH17-360D5.3	chr10	-	47970043	47973496	826	lincRNA	NA
ENSG00000198046	0.9101298099858	329.196767009583	8.3040434804001	1.72674112530446e-25	9.83169931407825e-24	ZNF667	chr19	-	56439325	56478065	8810	protein_coding	zinc_finger_protein_667
ENSG00000179456	7.33214453489527	614.78478246681	6.3643056047669	1.79175761262778e-25	1.01808111786935e-23	ZBTB18	chr1	+	244048939	244057476	3906	protein_coding	zinc_finger_and_BTB_domain_containing_18
ENSG00000102890	1246.74709310306	23.9881669123732	-5.6928321544106	1.84488321862969e-25	1.0443484925097e-23	ELMO3	chr16	+	67199111	67204029	2575	protein_coding	engulfment_and_cell_motility_3
ENSG00000156127	325.672009800908	1.38777878078145e-17	-11.3532121917014	1.84937898931756e-25	1.0443484925097e-23	BATF	chr14	+	75522425	75547015	980	protein_coding	basic_leucine_zipper_transcription_factor_ATF-like
ENSG00000198889	1.38777878078145e-17	328.106736406158	11.3638898069421	1.84937898931756e-25	1.0443484925097e-23	DCAF12L1	chrX	-	126549383	126552851	3382	protein_coding	DDB1_and_CUL4_associated_factor_12-like_1
ENSG00000157110	1486.18991706085	31.6183847293665	-5.54950816976039	1.89593690381717e-25	1.06844591786631e-23	RBPMS	chr8	+	30384479	30572261	8931	protein_coding	RNA_binding_protein_with_multiple_splicing
ENSG00000164659	4.57987785670322	499.241539999918	6.72772612841643	2.00085589598743e-25	1.12526662567588e-23	KIAA1324L	chr7	-	86876906	87059699	8115	protein_coding	KIAA1324-like
ENSG00000064655	415.577746412134	1.09771269193672	-8.41898816271303	2.08187775804501e-25	1.16844326987746e-23	EYA2	chr20	+	46894624	47188844	3618	protein_coding	EYA_transcriptional_coactivator_and_phosphatase_2
ENSG00000107105	1.38777878078145e-17	322.656583386933	11.3397327423618	2.61372023045785e-25	1.46394949201265e-23	ELAVL2	chr9	-	23690104	23826337	5140	protein_coding	ELAV_like_neuron-specific_RNA_binding_protein_2
ENSG00000279377	1.38777878078145e-17	321.566552782657	11.3348524078979	3.00565783727023e-25	1.68005276794245e-23	AC003973.3	chr19	-	21965708	21968529	2822	TEC	NA
ENSG00000121005	3.66244545564338	451.280193942931	6.89447359425345	3.08538799639325e-25	1.72112079693328e-23	CRISPLD1	chr8	+	74984515	75034558	4543	protein_coding	cysteine-rich_secretory_protein_LCCL_domain_containing_1
ENSG00000170160	3.66244545564338	449.100132756131	6.88748909611236	3.41543369572918e-25	1.90137332117911e-23	CCDC144A	chr17	+	16689537	16777881	15566	protein_coding	coiled-coil_domain_containing_144A
ENSG00000276850	1.38777878078145e-17	319.386491573665	11.3250419305351	3.45908442130481e-25	1.92178344788492e-23	CH17-360D5.2	chr10	-	47908064	47991850	2467	lincRNA	NA
ENSG00000188060	0.9101298099858	318.296460968946	8.25548198427407	3.7119414696458e-25	2.05810690235341e-23	RAB42	chr1	+	28592200	28595443	2180	protein_coding	RAB42_member_RAS_oncogene_family
ENSG00000166974	31.1847935465631	1406.14698641294	5.48880883316546	4.14101064886838e-25	2.2913869990851e-23	MAPRE2	chr18	+	34976928	35143470	6180	protein_coding	microtubule_associated_protein_RP/EB_family_member_2
ENSG00000139117	1.38777878078145e-17	315.026369153878	11.3052185418136	4.59243966028899e-25	2.53607797384754e-23	CPNE8	chr12	-	38646822	38907430	5178	protein_coding	copine_VIII
ENSG00000177694	552.271161000697	5.45768452873822	-6.63068480439358	4.71455961154954e-25	2.59829867489427e-23	NAALADL2	chr3	+	174438573	175810552	13599	protein_coding	N-acetylated_alpha-linked_acidic_dipeptidase-like_2
ENSG00000123388	992.625781626361	18.5380122243038	-5.73380231336221	5.3037534913509e-25	2.91717049531282e-23	HOXC11	chr12	+	53973126	53977643	3265	protein_coding	homeobox_C11
ENSG00000170962	2.74500333963777	400.048755985425	7.1200123973018	5.67295070241261e-25	3.11400832868362e-23	PDGFD	chr11	-	103907186	104164379	4266	protein_coding	platelet_derived_growth_factor_D
ENSG00000168497	1.38777878078145e-17	311.756277337415	11.2901701763362	5.69219773023937e-25	3.11834919879109e-23	SDPR	chr2	-	191834302	191847255	3229	protein_coding	serum_deprivation_response
ENSG00000111816	3128.3456811121	83.9398703451251	-5.21795064126002	6.09858651169939e-25	3.3343385220327e-23	FRK	chr6	-	115931149	116060758	13230	protein_coding	fyn-related_Src_family_tyrosine_kinase
ENSG00000260328	1.38777878078145e-17	310.66624673161	11.2851189699971	6.11698860563037e-25	3.33776396117938e-23	RP11-416I2.1	chr17	-	17011914	17014990	3077	lincRNA	NA
ENSG00000162078	577.041108515587	6.54770241941083	-6.43631455741877	7.20291532338541e-25	3.92252226353311e-23	ZG16B	chr16	+	2830169	2839585	2665	protein_coding	zymogen_granule_protein_16B
ENSG00000008513	2233.87536292167	57.7791296604884	-5.27002217066962	7.72322759308042e-25	4.19755893354357e-23	ST3GAL1	chr8	-	133454848	133571940	8729	protein_coding	ST3_beta-galactoside_alpha-23-sialyltransferase_1
ENSG00000182256	1.82754864465077	353.17744025224	7.49435368827866	8.03917395378066e-25	4.35228084490914e-23	GABRG3	chr15	+	26971282	27541991	12595	protein_coding	gamma-aminobutyric_acid_(GABA)_A_receptor_gamma_3
ENSG00000128422	9.16697626675744	645.305638915974	6.11708817407987	8.03955735869184e-25	4.35228084490914e-23	KRT17	chr17	-	41619437	41624842	2537	protein_coding	keratin_17_type_I
ENSG00000142661	0.9101298099858	307.396154913223	8.20522878697256	8.17478958644117e-25	4.41679545023023e-23	MYOM3	chr1	-	24056035	24112175	9254	protein_coding	myomesin_3
ENSG00000113721	3.66244545564338	431.659643253146	6.83036134891665	8.24183622654898e-25	4.44428898169262e-23	PDGFRB	chr5	-	150113837	150155872	7137	protein_coding	platelet-derived_growth_factor_receptor_beta_polypeptide
ENSG00000184785	0.9101298099858	306.306124306764	8.2001058340245	8.79409182783813e-25	4.73280468409738e-23	SMIM10	chrX	+	134990938	134992473	1536	protein_coding	small_integral_membrane_protein_10
ENSG00000156510	1.82754864465077	350.99737905079	7.48542372221804	9.13906159409598e-25	4.90885415818816e-23	HKDC1	chr10	+	69220303	69267559	4259	protein_coding	hexokinase_domain_containing_1
ENSG00000114251	31.1847935465631	1359.27567137508	5.43990363830736	9.15922290526285e-25	4.91009335511956e-23	WNT5A	chr3	-	55465715	55490539	7531	protein_coding	wingless-type_MMTV_integration_site_family_member_5A
ENSG00000138650	1.38777878078145e-17	305.216093700137	11.2595942013586	9.46233588770432e-25	5.05288736403411e-23	PCDH10	chr4	+	133149315	133208606	10161	protein_coding	protocadherin_10
ENSG00000182568	1.38777878078145e-17	305.216093700137	11.2595942013586	9.46233588770432e-25	5.05288736403411e-23	SATB1	chr3	-	18345387	18445588	13409	protein_coding	SATB_homeobox_1
ENSG00000196440	1.82754864465077	348.817317848878	7.476438137177	1.03963022159623e-24	5.5408664194027e-23	ARMCX4	chrX	+	101418287	101533459	13351	protein_coding	armadillo_repeat_containing_X-linked_4
ENSG00000182247	14.6714472879947	801.180012710723	5.75837324889392	1.1273994317548e-24	5.99702355371157e-23	UBE2E2	chr3	+	23203020	23591793	3274	protein_coding	ubiquitin_conjugating_enzyme_E2E_2
ENSG00000196611	1.38777878078145e-17	301.946001879237	11.2440597233976	1.18027619839984e-24	6.26617292127297e-23	MMP1	chr11	-	102789920	102798160	1970	protein_coding	matrix_metallopeptidase_1
ENSG00000233913	1054.09194724822	21.808104855422	-5.58745019530739	1.2233825198492e-24	6.48251304014891e-23	CTC-575D19.1	chr5	+	168616352	168616996	645	processed_pseudogene	NA
ENSG00000163661	0.9101298099858	300.855971271924	8.17421459268724	1.27106667519982e-24	6.72223166051351e-23	PTX3	chr3	+	157436789	157443628	1940	protein_coding	pentraxin_3
ENSG00000163297	1.82754864465077	345.547226045131	7.46285394536159	1.3480523789719e-24	7.11569836355205e-23	ANTXR2	chr4	-	79901149	80125454	9864	protein_coding	anthrax_toxin_receptor_2
ENSG00000154736	1.38777878078145e-17	299.765940664435	11.2336096916152	1.36914280754549e-24	7.21317937745374e-23	ADAMTS5	chr21	-	26917912	26966513	9056	protein_coding	ADAM_metallopeptidase_with_thrombospondin_type_1_motif_5
ENSG00000183742	490.804994837898	4.36767330927077	-6.77439410375938	1.44538730048742e-24	7.60030519133929e-23	MACC1	chr7	-	20134655	20217404	9898	protein_coding	metastasis_associated_in_colon_cancer_1
ENSG00000249695	1.38777878078145e-17	298.675910056769	11.2283561527679	1.47511361308306e-24	7.74181287660255e-23	RP11-598F7.4	chr12	-	137411	149169	5439	antisense	NA
ENSG00000138061	5130.12438239955	153.701836384102	-5.05972656594259	1.63068854066979e-24	8.54201248703999e-23	CYP1B1	chr2	-	38066973	38109902	6014	protein_coding	cytochrome_P450_family_1_subfamily_B_member_1
ENSG00000089041	1.82754864465077	341.187103638448	7.44454040467746	1.75274771151876e-24	9.16393817765728e-23	P2RX7	chr12	+	121132819	121188032	5546	protein_coding	purinergic_receptor_P2X_ligand_gated_ion_channel_7
ENSG00000113430	294.480223343811	1.38777878078145e-17	-11.2080248737604	1.84730777092353e-24	9.64000208883643e-23	IRX4	chr5	-	1877413	1887236	2815	protein_coding	iroquois_homeobox_4
ENSG00000145287	29.3499793347138	1255.72276604282	5.41269809827126	1.86076561942291e-24	9.69184001889193e-23	PLAC8	chr4	-	83090048	83137075	3853	protein_coding	placenta_specific_8
ENSG00000167306	1595.36116625529	39.2486025160081	-5.34092127088533	1.87616784050856e-24	9.75359012888961e-23	MYO5B	chr18	-	49822813	50195093	10488	protein_coding	myosin_VB
ENSG00000114854	7.33214453489527	554.833100099245	6.21630767081742	1.90473624043662e-24	9.88342478268819e-23	TNNC1	chr3	-	52451102	52454070	1168	protein_coding	troponin_C_type_1_(slow)
ENSG00000103544	967.85583427926	19.628043016514	-5.61542244544116	2.05643169956355e-24	1.06504572824288e-22	C16orf62	chr16	+	19555240	19706793	9767	protein_coding	chromosome_16_open_reading_frame_62
ENSG00000172201	446.769532391725	3.27767348587998	-7.04055765244976	2.23862387166506e-24	1.15722547170415e-22	ID4	chr6	+	19837386	19840684	2344	protein_coding	inhibitor_of_DNA_binding_4_dominant_negative_helix-loop-helix_protein
ENSG00000135919	38.524047943058	1521.69022811815	5.29896564562751	2.2895529014354e-24	1.18133197640478e-22	SERPINE2	chr2	-	223975112	224039319	8891	protein_coding	serpin_peptidase_inhibitor_clade_E_(nexin_plasminogen_activator_inhibitor_type_1)_member_2
ENSG00000164509	1.38777878078145e-17	293.225757015708	11.2017976091922	2.31814640360227e-24	1.19384539785517e-22	IL31RA	chr5	+	55851379	55922853	4576	protein_coding	interleukin_31_receptor_A
ENSG00000148516	1.82754864465077	335.736950627286	7.42131664417269	2.44309117922233e-24	1.25584019663165e-22	ZEB1	chr10	+	31318495	31529814	8650	protein_coding	zinc_finger_E-box_binding_homeobox_1
ENSG00000140859	36.689234652651	1456.28839319329	5.30574896356168	2.46138446140571e-24	1.26288309837907e-22	KIFC3	chr16	-	57758217	57863053	9600	protein_coding	kinesin_family_member_C3
ENSG00000196636	1.38777878078145e-17	292.135726406937	11.1964267224939	2.50154406211511e-24	1.27871678907486e-22	SDHAF3	chr7	+	97116590	97181763	2303	protein_coding	succinate_dehydrogenase_complex_assembly_factor_3
ENSG00000139329	1.38777878078145e-17	292.135726406937	11.1964267224939	2.50154406211511e-24	1.27871678907486e-22	LUM	chr12	-	91102629	91111831	3008	protein_coding	lumican
ENSG00000132199	1573.34343532704	39.2486025160081	-5.32087349052533	2.59198373456413e-24	1.3224887696521e-22	ENOSF1	chr18	-	670324	712676	10616	protein_coding	enolase_superfamily_member_1
ENSG00000135926	35.7718279381021	1422.49744514613	5.3082824577193	2.59942935864214e-24	1.32383160725958e-22	TMBIM1	chr2	-	218274192	218292586	5098	protein_coding	transmembrane_BAX_inhibitor_motif_containing_1
ENSG00000139910	1.82754864465077	334.646920024667	7.41662669139186	2.61225180560573e-24	1.32790271545218e-22	NOVA1	chr14	-	26443093	26597754	10046	protein_coding	neuro-oncological_ventral_antigen_1
ENSG00000236453	0.9101298099858	291.045695797976	8.12640618970793	2.70007930514009e-24	1.37001625407118e-22	AC003092.1	chr7	+	94022833	94066661	1064	lincRNA	NA
ENSG00000198768	2.74500333963777	372.797991045825	7.01826147959327	2.76323820072403e-24	1.39948091635565e-22	APCDD1L	chr20	-	58459101	58515131	3942	protein_coding	adenomatosis_polyposis_coli_down-regulated_1-like
ENSG00000118402	28.4325721119042	1204.49132865839	5.39821694930539	2.77188560118231e-24	1.40127988820064e-22	ELOVL4	chr6	-	79914812	79947580	3042	protein_coding	ELOVL_fatty_acid_elongase_4
ENSG00000135457	0.9101298099858	289.955665188822	8.12099501334592	2.91505377210987e-24	1.47095217957419e-22	TFCP2	chr12	-	51093663	51173134	3827	protein_coding	transcription_factor_CP2
ENSG00000088756	1.82754864465077	333.556889421918	7.41192144264527	2.98813619097573e-24	1.50506837707003e-22	ARHGAP28	chr18	+	6729718	6915716	11910	protein_coding	Rho_GTPase_activating_protein_28
ENSG00000170456	43.111080472052	1653.58392853224	5.25710149050322	3.13451989372984e-24	1.57591282627906e-22	DENND5B	chr12	-	31382223	31591097	11310	protein_coding	DENN/MADD_domain_containing_5B
ENSG00000065675	0.9101298099858	288.865634579474	8.11556346462399	3.14788554304516e-24	1.57974453137381e-22	PRKCQ	chr10	-	6427143	6580301	3295	protein_coding	protein_kinase_C_theta
ENSG00000150782	87.1465681594408	2976.88105435362	5.09209551468837	3.17800807278496e-24	1.59195628432895e-22	IL18	chr11	-	112143251	112164117	2628	protein_coding	interleukin_18
ENSG00000065609	1.82754864465077	332.466858819036	7.40720079783284	3.1967687324125e-24	1.59844248927411e-22	SNAP91	chr6	-	83552880	83709691	6651	protein_coding	synaptosome_associated_protein_91kDa
ENSG00000156968	1.38777878078145e-17	287.775603969929	11.1747409660954	3.40011996155839e-24	1.69703628063189e-22	MPV17L	chr16	+	15395754	15413268	6009	protein_coding	MPV17_mitochondrial_membrane_protein-like
ENSG00000010319	6.41472570341761	507.961784727927	6.27821214227001	3.43854353876128e-24	1.71310481629482e-22	SEMA3G	chr3	-	52433053	52445085	5011	protein_coding	sema_domain_immunoglobulin_domain_(Ig)_short_basic_domain_secreted_(semaphorin)_3G
ENSG00000184347	4.57987785670322	440.379888006591	6.54678191425909	3.54812900417339e-24	1.76450444382952e-22	SLIT3	chr5	-	168661733	169301129	14260	protein_coding	slit_guidance_ligand_3
ENSG00000147231	0.9101298099858	286.685573360185	8.10463863243464	3.67344150187657e-24	1.8235255368792e-22	CXorf57	chrX	+	106611930	106679442	4853	protein_coding	chromosome_X_open_reading_frame_57
ENSG00000153071	2.74500333963777	367.347838050978	6.99702089417674	3.98398350776153e-24	1.97411766571081e-22	DAB2	chr5	-	39371675	39462300	7717	protein_coding	Dab_mitogen-responsive_phosphoprotein_homolog_2_(Drosophila)
ENSG00000156140	1.38777878078145e-17	284.505512140093	11.1582600166562	4.63914285211888e-24	2.29050390621403e-22	ADAMTS3	chr4	-	72280969	72568799	6585	protein_coding	ADAM_metallopeptidase_with_thrombospondin_type_1_motif_3
ENSG00000169252	0.9101298099858	284.505512140093	8.09363044012457	4.63914285211888e-24	2.29050390621403e-22	ADRB2	chr5	+	148825245	148828687	3443	protein_coding	adrenoceptor_beta_2
ENSG00000187013	563.280026565554	7.63772441976772	-6.18296470022567	4.81184129082436e-24	2.37151339317134e-22	C17orf82	chr17	+	61411751	61413280	1530	lincRNA	chromosome_17_open_reading_frame_82
ENSG00000142173	254.114381696761	7844.95762889967	4.94749105321173	4.82134091430163e-24	2.37194448093398e-22	COL6A2	chr21	+	46098097	46132849	5386	protein_coding	collagen_type_VI_alpha_2
ENSG00000227051	17994.9010658132	600.61438482356	-4.90473485541627	5.23581375389437e-24	2.57125203653302e-22	C14orf132	chr14	+	96039324	96094080	7966	lincRNA	chromosome_14_open_reading_frame_132
ENSG00000249395	279.801735524892	1.38777878078145e-17	-11.1342928108524	5.42680256227295e-24	2.65556044955638e-22	CASC9	chr8	-	75223404	75324741	1473	lincRNA	cancer_susceptibility_candidate_9_(non-protein_coding)
ENSG00000157851	279.801735524892	1.38777878078145e-17	-11.1342928108524	5.42680256227295e-24	2.65556044955638e-22	DPYSL5	chr2	+	26847747	26950351	7079	protein_coding	dihydropyrimidinase_like_5
ENSG00000079819	155.951990775285	4895.33487696256	4.97105242600662	5.67245106462181e-24	2.77083617634395e-22	EPB41L2	chr6	-	130839347	131063322	10247	protein_coding	erythrocyte_membrane_protein_band_4.1-like_2
ENSG00000184012	357.78120156439	1.09771269193672	-8.20302105139707	6.14733058792624e-24	2.99747763295318e-22	TMPRSS2	chr21	-	41464551	41531116	6117	protein_coding	transmembrane_protease_serine_2
ENSG00000100461	1632.97478992255	43.6087267853336	-5.22299137477015	6.16586181925131e-24	3.00119231665894e-22	RBM23	chr14	-	22893206	22919184	14022	protein_coding	RNA_binding_motif_protein_23
ENSG00000230836	1513.71208072541	39.2486025160081	-5.2651354368293	6.29865062706589e-24	3.06040973312613e-22	LINC01293	chr2	+	74940258	74942670	1266	lincRNA	long_intergenic_non-protein_coding_RNA_1293
ENSG00000175040	0.9101298099858	279.05535908624	8.06573677266555	6.87878366795803e-24	3.33639205736356e-22	CHST2	chr3	+	143119331	143124014	4582	protein_coding	carbohydrate_(N-acetylglucosamine-6-O)_sulfotransferase_2
ENSG00000120708	193.565618018335	5954.84460162786	4.94221803659713	6.94084269415574e-24	3.36056540373199e-22	TGFBI	chr5	+	136028895	136063818	7810	protein_coding	transforming_growth_factor_beta_induced
ENSG00000136114	5.49730390528178	458.910408094957	6.34956561779878	7.36739410369697e-24	3.56082083032988e-22	THSD1	chr13	-	52377167	52406494	3348	protein_coding	thrombospondin_type_1_domain_containing_1
ENSG00000123977	1.38777878078145e-17	277.965328474831	11.1247223098846	7.44821940206045e-24	3.59356985572043e-22	DAW1	chr2	+	227871054	227924344	2933	protein_coding	dynein_assembly_factor_with_WDR_repeat_domains_1
ENSG00000136352	2.74500333963777	356.447532053571	6.95357789075965	7.90334830125062e-24	3.8064795382258e-22	NKX2-1	chr14	-	36516392	36521149	3165	protein_coding	NK2_homeobox_1
ENSG00000127920	1.38777878078145e-17	276.875297863203	11.1190561034946	8.0668422759858e-24	3.86491688905724e-22	GNG11	chr7	+	93921699	93928610	3055	protein_coding	guanine_nucleotide_binding_protein_(G_protein)_gamma_11
ENSG00000134762	1.38777878078145e-17	276.875297863203	11.1190561034946	8.0668422759858e-24	3.86491688905724e-22	DSC3	chr18	-	30990008	31042815	7056	protein_coding	desmocollin_3
ENSG00000110675	1.38777878078145e-17	276.875297863203	11.1190561034946	8.0668422759858e-24	3.86491688905724e-22	ELMOD1	chr11	+	107591091	107666779	5856	protein_coding	ELMO/CED-12_domain_containing_1
ENSG00000239713	1.38777878078145e-17	275.785267251355	11.1133675552172	8.73907913231797e-24	4.17971156900655e-22	APOBEC3G	chr22	+	39040961	39087743	5454	protein_coding	apolipoprotein_B_mRNA_editing_enzyme_catalytic_polypeptide-like_3G
ENSG00000132321	6.41472570341761	486.161172902729	6.21494175502868	9.43245011482253e-24	4.50350365638428e-22	IQCA1	chr2	-	236324147	236507542	5975	protein_coding	IQ_motif_containing_with_AAA_domain_1
ENSG00000175906	14.6714472879947	728.147963488033	5.6204995908575	1.02140112943346e-23	4.86820666560652e-22	ARL4D	chr17	+	43398959	43401137	1612	protein_coding	ADP_ribosylation_factor_like_GTPase_4D
ENSG00000173530	0.9101298099858	273.605206026987	8.03729314681508	1.02642152741278e-23	4.8752363428979e-22	TNFRSF10D	chr8	-	23135588	23164030	3538	protein_coding	tumor_necrosis_factor_receptor_superfamily_member_10d
ENSG00000182632	1.38777878078145e-17	273.605206026987	11.1019227233467	1.02642152741278e-23	4.8752363428979e-22	CCNYL2	chr10	-	42409727	42454385	1440	translated_unprocessed_pseudogene	cyclin_Y-like_2_pseudogene
ENSG00000144712	9.16697626675744	576.633711878952	5.95479187247255	1.03805607719148e-23	4.92199658255911e-22	CAND2	chr3	+	12796472	12871916	5478	protein_coding	cullin-associated_and_neddylation-dissociated_2_(putative)
ENSG00000101955	7.33214453489527	515.591998862792	6.11050683898003	1.05282606281626e-23	4.98343710043202e-22	SRPX	chrX	-	38149336	38220924	1987	protein_coding	sushi-repeat_containing_protein_X-linked
ENSG00000147642	2562.30651568731	77.3996854592757	-5.04686596387738	1.12115352350773e-23	5.29773935566773e-22	SYBU	chr8	-	109573978	109691791	7024	protein_coding	syntabulin
ENSG00000183779	9153.86470440478	309.576216125644	-4.88548997338439	1.12432424679836e-23	5.30360910998312e-22	ZNF703	chr8	+	37695751	37700021	3349	protein_coding	zinc_finger_protein_703
ENSG00000215808	1.38777878078145e-17	271.425144801708	11.0903863736734	1.30908081476164e-23	6.16456018608901e-22	LINC01139	chr1	-	238480384	238486023	1537	lincRNA	long_intergenic_non-protein_coding_RNA_1139
ENSG00000170271	2082.50346288338	61.0492224362073	-5.08953033174152	1.44445387150217e-23	6.79041468721045e-22	FAXDC2	chr5	-	154818491	154859252	7222	protein_coding	fatty_acid_hydroxylase_domain_containing_2
ENSG00000047346	4220.05817178181	137.351376248624	-4.94013600026435	1.4665630758301e-23	6.88258552020537e-22	FAM214A	chr15	-	52581317	52709817	9832	protein_coding	family_with_sequence_similarity_214_member_A
ENSG00000095739	6322.75147286416	212.563491284772	-4.89382283716549	1.48694706521409e-23	6.95871687154195e-22	BAMBI	chr10	+	28677342	28682939	2314	protein_coding	BMP_and_activin_membrane-bound_inhibitor
ENSG00000184678	1032.07421628185	23.9881669123732	-5.4202416711802	1.48784608576658e-23	6.95871687154195e-22	HIST2H2BE	chr1	-	149842204	149886652	2260	protein_coding	histone_cluster_2_H2be
ENSG00000203727	1.38777878078145e-17	269.245083575498	11.0787570307595	1.54159151181828e-23	7.19784518956102e-22	SAMD5	chr6	+	147508927	147737547	6320	protein_coding	sterile_alpha_motif_domain_containing_5
ENSG00000168994	6.41472570341761	474.170836391148	6.17892278892462	1.66468630700595e-23	7.75941324219839e-22	PXDC1	chr6	-	3722614	3752026	2474	protein_coding	PX_domain_containing_1
ENSG00000135272	1.38777878078145e-17	268.155052962037	11.0729070159593	1.67357708646025e-23	7.78765540689395e-22	MDFIC	chr7	+	114922154	115019916	5966	protein_coding	MyoD_family_inhibitor_domain_containing
ENSG00000213225	376.129311079484	2.18769296388965	-7.35107387997093	1.69504785928123e-23	7.87424175305626e-22	AC018804.7	chr2	+	130229379	130232106	2728	transcribed_processed_pseudogene	NA
ENSG00000160951	5.49730390528178	442.559949194333	6.29723957288206	1.73390366590309e-23	8.04116099763928e-22	PTGER1	chr19	-	14472466	14475362	1421	protein_coding	prostaglandin_E_receptor_1
ENSG00000011028	149.530151812021	4497.47371491118	4.90937612050439	1.74849896420421e-23	8.09519697215151e-22	MRC2	chr17	+	62627401	62693597	6860	protein_coding	mannose_receptor_C_type_2
ENSG00000173890	1079.77930003887	26.1682290913477	-5.36051367900575	1.80874507465873e-23	8.36005013414953e-22	GPR160	chr3	+	170037929	170085403	4458	protein_coding	G_protein-coupled_receptor_160
ENSG00000145192	0.9101298099858	267.065022348336	8.00240360666533	1.81735518667162e-23	8.38575251487522e-22	AHSG	chr3	+	186612923	186621318	2353	protein_coding	alpha-2-HS-glycoprotein
ENSG00000178695	25.6803498996692	1022.45622128899	5.30802457666086	1.94757558422699e-23	8.97157054301953e-22	KCTD12	chr13	-	76880166	76886390	6225	protein_coding	potassium_channel_tetramerization_domain_containing_12
ENSG00000223764	1356.83574781519	35.9785092207799	-5.23242120999025	1.97632413906657e-23	9.08877761680095e-22	RP11-54O7.3	chr1	-	916865	921016	4152	lincRNA	NA
ENSG00000039560	199.070051166599	5819.68080959428	4.86866846706878	2.0760603672227e-23	9.53150854073314e-22	RAI14	chr5	+	34656237	34832627	7687	protein_coding	retinoic_acid_induced_14
ENSG00000169946	0.9101298099858	264.884961120201	7.99058370589706	2.14478703631654e-23	9.83063138095686e-22	ZFPM2	chr8	+	104590733	105804532	7775	protein_coding	zinc_finger_protein_FOG_family_member_2
ENSG00000226167	338.515686525236	1.09771269193672	-8.12319631200768	2.21622738317063e-23	1.01411762503453e-21	AP4B1-AS1	chr1	+	113856635	113901237	1734	antisense	AP4B1_antisense_RNA_1
ENSG00000100181	1.82754864465077	304.126063093342	7.2787070195316	2.28711582066219e-23	1.0431767898039e-21	TPTEP1	chr22	+	16601887	16698742	12081	lincRNA	transmembrane_phosphatase_with_tensin_homology_pseudogene_1
ENSG00000214530	14250.0520021005	504.691692955236	-4.81909991972678	2.28731902204192e-23	1.0431767898039e-21	STARD10	chr11	-	72754729	72794168	4197	protein_coding	StAR_related_lipid_transfer_domain_containing_10
ENSG00000144488	1.38777878078145e-17	262.704899891071	11.0432957415207	2.53401232600814e-23	1.15377273141639e-21	ESPNL	chr2	+	238100157	238133287	5362	protein_coding	espin-like
ENSG00000172061	9.16697626675744	553.743069509938	5.89636552483163	2.62568585727772e-23	1.19353697125611e-21	LRRC15	chr3	-	194355247	194369743	5940	protein_coding	leucine_rich_repeat_containing_15
ENSG00000168952	3.66244545564338	369.527899249215	6.60621615656591	2.91301976765687e-23	1.32196298069854e-21	STXBP6	chr14	-	24809656	25050297	8067	protein_coding	syntaxin_binding_protein_6_(amisyn)
ENSG00000148346	459.613208950952	5.45768452873822	-6.36579748866966	2.97693342085028e-23	1.34874210884355e-21	LCN2	chr9	+	128149071	128153455	1598	protein_coding	lipocalin_2
ENSG00000159164	3.66244545564338	368.437868650147	6.60195556775249	3.09591790337953e-23	1.4003427345533e-21	SV2A	chr1	-	149903318	149917882	4824	protein_coding	synaptic_vesicle_glycoprotein_2A
ENSG00000157680	0.9101298099858	260.524838660924	7.96664935735198	3.26106948167973e-23	1.46780150271153e-21	DGKI	chr7	-	137381037	137847092	15549	protein_coding	diacylglycerol_kinase_iota
ENSG00000253313	257.784003685028	1.38777878078145e-17	-11.0161085156015	3.26106948167973e-23	1.46780150271153e-21	C1orf210	chr1	-	43281883	43285617	1516	protein_coding	chromosome_1_open_reading_frame_210
ENSG00000272622	257.784003685028	1.38777878078145e-17	-11.0161085156015	3.26106948167973e-23	1.46780150271153e-21	RP11-395N3.2	chr2	+	226800146	226811029	584	lincRNA	NA
ENSG00000275874	3.66244545564338	365.167776852335	6.58909778244081	3.71976789050237e-23	1.67152511040369e-21	LINC00162	chr21	-	44999208	45004727	733	lincRNA	long_intergenic_non-protein_coding_RNA_162
ENSG00000138613	455.026181609635	5.45768452873822	-6.35133094538636	3.80807838112026e-23	1.70841702380405e-21	APH1B	chr15	+	63276018	63309126	5494	protein_coding	aph-1_homolog_B_gamma_secretase_subunit
ENSG00000254535	0.9101298099858	258.344777429737	7.95453161540879	3.86379076648011e-23	1.73058810861514e-21	PABPC4L	chr4	-	134196333	134201748	4944	protein_coding	poly(A)_binding_protein_cytoplasmic_4-like
ENSG00000118495	45.8632995896368	1535.86062568438	5.06154232205536	3.96124141814509e-23	1.77135122342127e-21	PLAGL1	chr6	-	143940300	144064599	8719	protein_coding	PLAG1_like_zinc_finger_1
ENSG00000087510	3843.92193551873	130.811192113891	-4.87578052914558	4.22899065013367e-23	1.88801090696958e-21	TFAP2C	chr20	+	56629302	56639283	3005	protein_coding	transcription_factor_AP-2_gamma_(activating_enhancer_binding_protein_2_gamma)
ENSG00000171649	1.82754864465077	295.405818232685	7.23675218197924	4.45554419733087e-23	1.9859306478249e-21	ZIK1	chr19	+	57578456	57593777	5257	protein_coding	zinc_finger_protein_interacting_with_K_protein_1
ENSG00000173068	0.9101298099858	256.164716197485	7.9423112292059	4.58321799994387e-23	2.03953200997502e-21	BNC2	chr9	-	16409503	16870843	15323	protein_coding	basonuclin_2
ENSG00000054179	326.589415282131	1.09771269193672	-8.07147211075979	4.61901768496301e-23	2.05214225127896e-21	ENTPD2	chr9	-	137048098	137054045	2633	protein_coding	ectonucleoside_triphosphate_diphosphohydrolase_2
ENSG00000134531	171.547885175391	4886.61463231494	4.83108139496633	4.96649307530828e-23	2.20296009780731e-21	EMP1	chr12	+	13196716	13219939	7838	protein_coding	epithelial_membrane_protein_1
ENSG00000140323	15.5888571884922	706.347351767929	5.48990421047388	5.16327834513881e-23	2.28655906231341e-21	DISP2	chr15	+	40358235	40378639	12754	protein_coding	dispatched_homolog_2_(Drosophila)
ENSG00000075618	247.692543205754	6889.00080946202	4.79693137923336	5.35729902088553e-23	2.36866688703172e-21	FSCN1	chr7	+	5592823	5606655	3692	protein_coding	fascin_actin-bundling_protein_1
ENSG00000113083	40.3588610654512	1378.89622185655	5.08991340496637	5.63857282601723e-23	2.48902714748475e-21	LOX	chr5	-	122063195	122078285	5468	protein_coding	lysyl_oxidase
ENSG00000138623	5.49730390528178	417.489245519879	6.21312861075232	6.45417886335517e-23	2.84312836427655e-21	SEMA7A	chr15	-	74409289	74434467	4309	protein_coding	semaphorin_7A_GPI_membrane_anchor_(John_Milton_Hagen_blood_group)
ENSG00000204103	250.444759703748	1.38777878078145e-17	-10.9744597499055	6.47175868527369e-23	2.84312836427655e-21	MAFB	chr20	-	40685848	40689240	3393	protein_coding	v-maf_avian_musculoaponeurotic_fibrosarcoma_oncogene_homolog_B
ENSG00000165152	1.38777878078145e-17	251.804593729691	10.9821850401048	6.47175868527369e-23	2.84312836427655e-21	TMEM246	chr9	-	101473171	101533537	5568	protein_coding	transmembrane_protein_246
ENSG00000133256	4.57987785670322	385.878358223716	6.35623359028764	6.826459334907e-23	2.99416998675084e-21	PDE6B	chr4	+	625584	670782	5086	protein_coding	phosphodiesterase_6B
ENSG00000196632	6.41472570341761	444.740010381835	6.08650160879403	6.94590151119119e-23	3.0417076028546e-21	WNK3	chrX	-	54192823	54358642	11472	protein_coding	WNK_lysine_deficient_protein_kinase_3
ENSG00000231437	321.084982392577	1.09771269193672	-8.0469592187174	6.9589493036846e-23	3.04257654690986e-21	RP11-88H9.2	chr1	+	111989770	111998842	3590	lincRNA	NA
ENSG00000137267	42.193674037534	1419.22735339953	5.06756436859936	7.01465919571108e-23	3.06206575462302e-21	TUBB2A	chr6	-	3153669	3157526	1727	protein_coding	tubulin_beta_2A_class_IIa
ENSG00000172137	0.9101298099858	250.714563112039	7.91129957393982	7.06010038393492e-23	3.07214906105371e-21	CALB2	chr16	+	71358713	71390438	1703	protein_coding	calbindin_2
ENSG00000145934	1.38777878078145e-17	250.714563112039	10.9759291504715	7.06010038393492e-23	3.07214906105371e-21	TENM2	chr5	+	167284799	168264157	11070	protein_coding	teneurin_transmembrane_protein_2
ENSG00000172379	528.418618927462	8.72774907734345	-5.90106983669887	7.18363405482398e-23	3.12096556306026e-21	ARNT2	chr15	+	80404350	80597937	7741	protein_coding	aryl_hydrocarbon_receptor_nuclear_translocator_2
ENSG00000261377	0.9101298099858	249.624532494098	7.90501643900551	7.70427012699464e-23	3.33661626397606e-21	PDCD6IPP2	chr15	+	28789664	28859007	5244	transcribed_unprocessed_pseudogene	PDCD6IP_pseudogene_2
ENSG00000112769	1.38777878078145e-17	249.624532494098	10.9696460155372	7.70427012699464e-23	3.33661626397606e-21	LAMA4	chr6	-	112108760	112254939	11575	protein_coding	laminin_subunit_alpha_4
ENSG00000171798	579.793324904825	10.9078032090939	-5.71703580818685	8.35203985517029e-23	3.61146930907293e-21	KNDC1	chr10	+	133160447	133226412	7985	protein_coding	kinase_non-catalytic_C-lobe_domain_(KIND)_containing_1
ENSG00000171557	245.857732205502	1.38777878078145e-17	-10.9478051766725	9.18274795113924e-23	3.96443879755542e-21	FGG	chr4	-	154604134	154612967	3600	protein_coding	fibrinogen_gamma_chain
ENSG00000076641	3.66244545564338	349.907348449892	6.52753143588402	9.50967097312818e-23	4.09914516351094e-21	PAG1	chr8	-	80967810	81112068	11023	protein_coding	phosphoprotein_membrane_anchor_with_glycosphingolipid_microdomains_1
ENSG00000156466	1.38777878078145e-17	247.444471257337	10.9569970532127	1.00298649208015e-22	4.31337150899737e-21	GDF6	chr8	-	96142330	96160792	3701	protein_coding	growth_differentiation_factor_6
ENSG00000165475	1368.76201874024	40.3386335971558	-5.08052451155112	1.00380268563264e-22	4.31337150899737e-21	CRYL1	chr13	-	20403667	20525857	2196	protein_coding	crystallin_lambda_1
ENSG00000170500	1562.33456986261	47.9688509055297	-5.02206761240402	1.25975829059439e-22	5.40477577997446e-21	LONRF2	chr2	-	100273291	100322733	13933	protein_coding	LON_peptidase_N-terminal_domain_and_ring_finger_2
ENSG00000129757	10.0843900675811	543.932794204726	5.73483680060348	1.2799144808608e-22	5.48269908693969e-21	CDKN1C	chr11	-	2883213	2885881	2586	protein_coding	cyclin-dependent_kinase_inhibitor_1C_(p57_Kip2)
ENSG00000196549	25.6803498996692	939.613896931016	5.18614001434006	1.36349171550612e-22	5.8316307415449e-21	MME	chr3	+	155024124	155183729	9620	protein_coding	membrane_metallo-endopeptidase
ENSG00000154655	1.38777878078145e-17	243.084348780202	10.9313614838021	1.43203226373284e-22	6.10578593564601e-21	L3MBTL4	chr18	-	5954706	6415237	7959	protein_coding	l(3)mbt-like_4_(Drosophila)
ENSG00000253304	0.9101298099858	243.084348780202	7.86673190727041	1.43203226373284e-22	6.10578593564601e-21	TMEM200B	chr1	-	29119428	29123935	2639	protein_coding	transmembrane_protein_200B
ENSG00000145147	1.82754864465077	279.05535908624	7.15463876339932	1.52633498583533e-22	6.49779232901816e-21	SLIT2	chr4	+	20253260	20620561	9712	protein_coding	slit_guidance_ligand_2
ENSG00000198797	240.353299196821	1.38777878078145e-17	-10.9151557142199	1.56662176220398e-22	6.65898996636348e-21	BRINP2	chr1	+	177171497	177282422	3953	protein_coding	bone_morphogenetic_protein/retinoic_acid_inducible_neural-specific_2
ENSG00000173706	126.595012075837	3502.27579444588	4.78855086339212	1.62563747984288e-22	6.8991753600554e-21	HEG1	chr3	-	124965710	125055958	9925	protein_coding	heart_development_protein_with_EGF-like_domains_1
ENSG00000111319	1842.14323369459	59.959191518217	-4.9385503623201	1.80423011812176e-22	7.64532087495633e-21	SCNN1A	chr12	-	6346843	6377730	5876	protein_coding	sodium_channel_non_voltage_gated_1_alpha_subunit
ENSG00000113448	4.57987785670322	369.527899249215	6.29379009916659	1.87082939211108e-22	7.91533524806876e-21	PDE4D	chr5	-	58969038	60522120	15979	protein_coding	phosphodiesterase_4D
ENSG00000144749	4732.88782071533	175.502449546625	-4.75223617267529	1.91647234783265e-22	8.09599171086723e-21	LRIG1	chr3	-	66378797	66501263	7032	protein_coding	leucine-rich_repeats_and_immunoglobulin-like_domains_1
ENSG00000181773	1.82754864465077	275.785267251355	7.13763996941934	1.9360421462366e-22	8.16611887479336e-21	GPR3	chr1	+	27392644	27395814	2115	protein_coding	G_protein-coupled_receptor_3
ENSG00000142303	4.57987785670322	368.437868650147	6.28952951035317	1.98768218559327e-22	8.37109460735077e-21	ADAMTS10	chr19	-	8580242	8610735	5703	protein_coding	ADAM_metallopeptidase_with_thrombospondin_type_1_motif_10
ENSG00000132639	1.38777878078145e-17	238.724226298056	10.9052621368609	2.05516613123907e-22	8.64206785553604e-21	SNAP25	chr20	+	10218830	10307418	3357	protein_coding	synaptosome_associated_protein_25kDa
ENSG00000152137	335.763470086567	2.18769296388965	-7.18735102336856	2.06855148811548e-22	8.68507396559751e-21	HSPB8	chr12	+	119178642	119221131	2860	protein_coding	heat_shock_protein_family_B_(small)_member_8
ENSG00000179178	334.846064606744	2.18769296388965	-7.18340530431974	2.20937937889909e-22	9.24811907140092e-21	TMEM125	chr1	+	43269994	43274002	2127	protein_coding	transmembrane_protein_125
ENSG00000203697	334.846064606744	2.18769296388965	-7.18340530431974	2.20937937889909e-22	9.24811907140092e-21	CAPN8	chr1	-	223538007	223665734	5192	protein_coding	calpain_8
ENSG00000047457	364.203039899433	3.27767348587998	-6.745866025574	2.24473103927485e-22	9.38063180863059e-21	CP	chr3	-	149162410	149222055	7296	protein_coding	ceruloplasmin_(ferroxidase)
ENSG00000166342	1.38777878078145e-17	237.634195676707	10.8986628527311	2.25126976971608e-22	9.38063180863059e-21	NETO1	chr18	-	72742314	72868146	5509	protein_coding	neuropilin_and_tolloid_like_1
ENSG00000228623	1.38777878078145e-17	237.634195676707	10.8986628527311	2.25126976971608e-22	9.38063180863059e-21	ZNF883	chr9	-	112997120	113050043	2447	lincRNA	zinc_finger_protein_883
ENSG00000174945	763.274417091668	18.5380122243038	-5.35481162755925	2.26159772874922e-22	9.40940985451321e-21	AMZ1	chr7	+	2679522	2775500	7011	protein_coding	archaelysin_family_metallopeptidase_1
ENSG00000189212	2.74500333963777	306.306124306764	6.73493987025507	2.3083363778827e-22	9.58935932449428e-21	DPY19L2P1	chr7	-	35079989	35186041	8272	transcribed_unprocessed_pseudogene	DPY19L2_pseudogene_1
ENSG00000176563	7.33214453489527	449.100132756131	5.91136257420598	2.34723715239585e-22	9.73625474027726e-21	CNTD1	chr17	+	42798792	42811587	3378	protein_coding	cyclin_N-terminal_domain_containing_1
ENSG00000105810	42.193674037534	1345.10527380466	4.99018429012198	2.40382885487929e-22	9.95597851476435e-21	CDK6	chr7	-	92604921	92836594	12260	protein_coding	cyclin-dependent_kinase_6
ENSG00000282826	1.82754864465077	272.515175414463	7.12043849382282	2.66776192674926e-22	1.1032499360531e-20	FRG1CP	chr20	-	28580709	28602664	769	unprocessed_pseudogene	FSHD_region_gene_1_family_member_C_pseudogene
ENSG00000240694	9.16697626675744	500.331570591066	5.75006581135084	2.68313377973395e-22	1.10794087201897e-20	PNMA2	chr8	-	26504686	26514092	5579	protein_coding	paraneoplastic_Ma_antigen_2
ENSG00000198885	3.66244545564338	332.466858819036	6.45379430837874	3.07914673051832e-22	1.26955943382285e-20	ITPRIPL1	chr2	+	96325331	96330517	4652	protein_coding	inositol_145-trisphosphate_receptor_interacting_protein-like_1
ENSG00000189056	1.38777878078145e-17	234.364103810648	10.8786819221729	3.2524444141451e-22	1.33700259840664e-20	RELN	chr7	-	103471784	103989516	12642	protein_coding	reelin
ENSG00000228613	232.096649660096	1.38777878078145e-17	-10.8647528642111	3.2524444141451e-22	1.33700259840664e-20	AC144450.1	chr2	-	1546665	1620113	786	antisense	NA
ENSG00000143552	466.95245269426	7.63772441976772	-5.91245748318528	3.29469471309124e-22	1.35234924335406e-20	NUP210L	chr1	-	153992685	154155116	5889	protein_coding	nucleoporin_210kDa_like
ENSG00000006756	2137.54779017183	74.1295929543996	-4.84757630369912	3.34908866830091e-22	1.3726272349768e-20	ARSD	chrX	-	2903970	2929351	7030	protein_coding	arylsulfatase_D
ENSG00000159184	0.9101298099858	233.274073187944	7.80733006301048	3.56883005754445e-22	1.46051183649598e-20	HOXB13	chr17	-	48724763	48729178	3467	protein_coding	homeobox_B13
ENSG00000180336	12.8366262054278	570.093528346289	5.45844304987883	3.81745208127666e-22	1.5599368452777e-20	MEIOC	chr17	+	44656404	44690308	8609	protein_coding	meiosis_specific_with_coiled-coil_domain
ENSG00000196954	22.928126699835	820.800563239157	5.15379337527235	4.0113085936722e-22	1.636721033154e-20	CASP4	chr11	-	104942866	104969436	7256	protein_coding	caspase_4
ENSG00000082269	22.928126699835	818.620502069499	5.14995700097335	4.24033493994916e-22	1.72760668420062e-20	FAM135A	chr6	+	70412941	70561174	10589	protein_coding	family_with_sequence_similarity_135_member_A
ENSG00000018236	0.9101298099858	231.094011941482	7.79379079359681	4.30140240391537e-22	1.74989448979403e-20	CNTN1	chr12	+	40692442	41072418	7492	protein_coding	contactin_1
ENSG00000117595	295.397628830758	1.09771269193672	-7.926713622349	4.46111365019352e-22	1.81218739282086e-20	IRF6	chr1	-	209785623	209806175	4915	protein_coding	interferon_regulatory_factor_6
ENSG00000183668	11.0018028728265	514.501968272216	5.53053818277659	4.61086887834577e-22	1.87025818618565e-20	PSG9	chr19	-	43211791	43269530	5048	protein_coding	pregnancy_specific_beta-1-glycoprotein_9
ENSG00000228630	638.507274487956	14.1778906812214	-5.48142413743886	4.64939611718686e-22	1.88310813871511e-20	HOTAIR	chr12	-	53962308	53974956	2602	antisense	HOX_transcript_antisense_RNA
ENSG00000117228	2.74500333963777	296.495848840896	6.68799579218874	4.80515439089443e-22	1.943331630941e-20	GBP1	chr1	-	89052319	89065360	4992	protein_coding	guanylate_binding_protein_1_interferon-inducible
ENSG00000154639	15.5888571884922	637.675424805282	5.34237441023789	5.17054275606645e-22	2.08775557776279e-20	CXADR	chr21	+	17512382	17593579	6682	protein_coding	coxsackie_virus_and_adenovirus_receptor
ENSG00000163683	16356.41492476	666.016220068592	-4.61791361591204	5.17744556210401e-22	2.08775557776279e-20	SMIM14	chr4	-	39546330	39639090	6721	protein_coding	small_integral_membrane_protein_14
ENSG00000153714	1175.18946751844	35.9785092207799	-5.02509009845486	5.38980286691001e-22	2.17020451892961e-20	LURAP1L	chr9	+	12775021	12822131	2132	protein_coding	leucine_rich_adaptor_protein_1-like
ENSG00000176532	403.651475281054	5.45768452873822	-6.17854458726911	5.44638751154726e-22	2.18978220694534e-20	PRR15	chr7	+	29563811	29567295	1982	protein_coding	proline_rich_15
ENSG00000143369	21.0933105412288	784.829553934318	5.2087673213293	5.51014418388043e-22	2.21218211972111e-20	ECM1	chr1	+	150508062	150513789	3360	protein_coding	extracellular_matrix_protein_1
ENSG00000115705	291.728006881792	1.09771269193672	-7.90868734675153	5.5785886625481e-22	2.23639601762005e-20	TPO	chr2	+	1374223	1543711	6841	protein_coding	thyroid_peroxidase
ENSG00000198914	1.38777878078145e-17	227.823920069089	10.8378702018247	5.70668713291636e-22	2.28441925534691e-20	POU3F3	chr2	+	104855511	104860471	4961	protein_coding	POU_class_3_homeobox_3
ENSG00000163694	3237.51693018762	122.090946514791	-4.72753612743488	5.88337310144864e-22	2.35172447184505e-20	RBM47	chr4	-	40423267	40630875	8544	protein_coding	RNA_binding_motif_protein_47
ENSG00000197106	1.82754864465077	261.614869276126	7.06157226349234	6.05682107013696e-22	2.41754189041853e-20	SLC6A17	chr1	+	110150486	110202202	6644	protein_coding	solute_carrier_family_6_(neutral_amino_acid_transporter)_member_17
ENSG00000165194	8.2495612111708	455.64031631585	5.76496759672422	6.19446872435049e-22	2.46889977374439e-20	PCDH19	chrX	-	100291644	100410273	9756	protein_coding	protocadherin_19
ENSG00000172123	1.38777878078145e-17	226.73388944422	10.8309545774259	6.27508226567696e-22	2.49020255971691e-20	SLFN12	chr17	-	35411060	35433283	3560	protein_coding	schlafen_family_member_12
ENSG00000265190	0.9101298099858	226.73388944422	7.76632500089427	6.27508226567696e-22	2.49020255971691e-20	ANXA8	chr10	-	47460162	47484158	4955	protein_coding	annexin_A8
ENSG00000196132	1.38777878078145e-17	226.73388944422	10.8309545774259	6.27508226567696e-22	2.49020255971691e-20	MYT1	chr20	+	64151791	64242253	6265	protein_coding	myelin_transcription_factor_1
ENSG00000130545	453.19137067272	7.63772441976772	-5.86931454863056	6.50705576140548e-22	2.57853804746991e-20	CRB3	chr19	+	6463777	6467221	1592	protein_coding	crumbs_family_member_3
ENSG00000174099	11.9192148715908	530.852427126864	5.46142702986095	6.65132133020386e-22	2.63191349499189e-20	MSRB3	chr12	+	65278643	65488244	5791	protein_coding	methionine_sulfoxide_reductase_B3
ENSG00000272763	1.38777878078145e-17	225.643858818974	10.824005642929	6.90259049224463e-22	2.72741582079338e-20	RP11-357H14.17	chr17	-	48635923	48647023	1596	lincRNA	NA
ENSG00000274750	477.043912835934	8.72774907734345	-5.75354925543036	7.04616220425963e-22	2.78015074288872e-20	HIST1H3E	chr6	+	26224199	26227473	2679	protein_coding	histone_cluster_1_H3e
ENSG00000203635	288.05838492962	1.09771269193672	-7.89043298238345	7.53928354130939e-22	2.96927535965871e-20	AC144450.2	chr2	-	1620510	1625419	1641	lincRNA	NA
ENSG00000250510	8.2495612111708	452.370224536245	5.75457884066139	7.54708365659954e-22	2.96927535965871e-20	GPR162	chr12	+	6821545	6829972	3295	protein_coding	G_protein-coupled_receptor_162
ENSG00000197888	222.922594582717	1.38777878078145e-17	-10.8066036312096	7.59562166616482e-22	2.97984581228529e-20	UGT2B17	chr4	-	68537184	68568527	2077	protein_coding	UDP_glucuronosyltransferase_2_family_polypeptide_B17
ENSG00000079841	1.38777878078145e-17	224.553828193347	10.8170230758945	7.59562166616482e-22	2.97984581228529e-20	RIMS1	chr6	+	71886703	72403143	12788	protein_coding	regulating_synaptic_membrane_exocytosis_1
ENSG00000101298	8.2495612111708	450.190163349559	5.74761120869989	8.33530751812905e-22	3.2653745307132e-20	SNPH	chr20	+	1266316	1309328	5574	protein_coding	syntaphilin
ENSG00000087116	0.9101298099858	223.463797567332	7.74537697264673	9.20759570397566e-22	3.60196428812283e-20	ADAMTS2	chr5	-	179110851	179345430	7687	protein_coding	ADAM_metallopeptidase_with_thrombospondin_type_1_motif_2
ENSG00000147813	26.5977574016326	880.752245389712	5.04243418671827	1.08885849311283e-21	4.25350815612159e-20	NAPRT	chr8	-	143574785	143578649	3079	protein_coding	nicotinate_phosphoribosyltransferase
ENSG00000127252	1.38777878078145e-17	220.193705686918	10.7887498669845	1.23236841447443e-21	4.80047645417301e-20	HRASLS	chr3	+	193241125	193277738	1169	protein_coding	HRAS-like_suppressor
ENSG00000166770	1.38777878078145e-17	220.193705686918	10.7887498669845	1.23236841447443e-21	4.80047645417301e-20	ZNF667-AS1	chr19	+	56477250	56500666	3629	lincRNA	ZNF667_antisense_RNA_1_(head_to_head)
ENSG00000267280	1038.49605448067	32.7084158598049	-4.98371955260431	1.23731889956305e-21	4.81294300663131e-20	TBX2-AS1	chr17	-	61393456	61411555	1206	antisense	TBX2_antisense_RNA_1
ENSG00000116711	0.9101298099858	219.103675059306	7.71696455621196	1.35915528839155e-21	5.27939683418872e-20	PLA2G4A	chr1	+	186828953	186988981	2875	protein_coding	phospholipase_A2_group_IVA
ENSG00000159374	1.82754864465077	251.804593729691	7.00645745430696	1.41389651542724e-21	5.48428322577779e-20	M1AP	chr2	-	74557883	74648338	3000	protein_coding	meiosis_1_associated_protein
ENSG00000088538	17.4236759818468	657.295975373614	5.22682626140222	1.46617808879256e-21	5.67906529857523e-20	DOCK3	chr3	+	50675241	51384198	8755	protein_coding	dedicator_of_cytokinesis_3
ENSG00000240065	20.1759022113556	728.147963488033	5.16438195051164	1.47561655387809e-21	5.70758521071749e-20	PSMB9	chr6	+	32844136	32859585	3072	protein_coding	proteasome_subunit_beta_9
ENSG00000175356	701.80825128687	18.5380122243038	-5.23370845935249	1.49093213896823e-21	5.7587253867648e-20	SCUBE2	chr11	-	9020391	9138114	7099	protein_coding	signal_peptide_CUB_domain_EGF-like_2
ENSG00000130701	333.928659126786	3.27767348587998	-6.62071017592108	1.49918575990236e-21	5.78248353198804e-20	RBBP8NL	chr20	-	62410237	62427533	2793	protein_coding	RBBP8_N-terminal_like
ENSG00000169860	5.49730390528178	361.897685053596	6.00703354899276	1.52151043109224e-21	5.86037232009351e-20	P2RY1	chr3	+	152834693	152841439	6747	protein_coding	purinergic_receptor_P2Y_G-protein_coupled_1
ENSG00000037757	410.073313583991	6.54770241941083	-5.94365611120807	1.60889264527014e-21	6.18827365560478e-20	MRI1	chr19	+	13764532	13774282	3456	protein_coding	methylthioribose-1-phosphate_isomerase_1
ENSG00000170745	277.966924543635	1.09771269193672	-7.83900884989589	1.62706450609842e-21	6.24942751148221e-20	KCNS3	chr2	+	17877847	18361616	3131	protein_coding	potassium_voltage-gated_channel_modifier_subfamily_S_member_3
ENSG00000138792	215.583350490116	1.38777878078145e-17	-10.7583354950049	1.65512031295471e-21	6.3483213007765e-20	ENPEP	chr4	+	110365733	110565285	7802	protein_coding	glutamyl_aminopeptidase_(aminopeptidase_A)
ENSG00000171604	6769.52792904986	283.415481529741	-4.57749728805688	1.72934694529068e-21	6.62378417025614e-20	CXXC5	chr5	+	139647299	139683882	3852	protein_coding	CXXC_finger_protein_5
ENSG00000230006	1.38777878078145e-17	215.833583173971	10.7599114794683	1.82752867888751e-21	6.97071653232806e-20	ANKRD36BP2	chr2	+	88765807	88806612	8042	transcribed_unprocessed_pseudogene	ankyrin_repeat_domain_36B_pseudogene_2
ENSG00000261786	1.38777878078145e-17	215.833583173971	10.7599114794683	1.82752867888751e-21	6.97071653232806e-20	RP4-555D20.2	chr3	+	44117299	44122365	5067	lincRNA	NA
ENSG00000184613	0.9101298099858	215.833583173971	7.69528190293661	1.82752867888751e-21	6.97071653232806e-20	NELL2	chr12	-	44508275	44921848	6424	protein_coding	neural_EGFL_like_2
ENSG00000171451	2.74500333963777	277.965328474831	6.59492676958351	1.90313797208946e-21	7.24905780753909e-20	DSEL	chr18	-	67506582	67516980	9531	protein_coding	dermatan_sulfate_epimerase-like
ENSG00000230487	1684.34949541579	61.0492224362073	-4.78342448562724	1.92291597920336e-21	7.31426173500297e-20	PSMG3-AS1	chr7	+	1570073	1589626	6355	lincRNA	PSMG3_antisense_RNA_1_(head_to_head)
ENSG00000124343	330.259037205583	3.27767348587998	-6.60477460797223	1.95297298906168e-21	7.41833013427975e-20	XG	chrX	+	2752050	2815927	2774	protein_coding	Xg_blood_group
ENSG00000136160	1.38777878078145e-17	214.743552544675	10.7526109021415	2.01869276663723e-21	7.65738893452283e-20	EDNRB	chr13	-	77895481	77919768	5014	protein_coding	endothelin_receptor_type_B
ENSG00000158406	501.813860432179	10.9078032090939	-5.50870022495607	2.14783228615402e-21	8.13602420131154e-20	HIST1H4H	chr6	-	26277609	26285638	2163	protein_coding	histone_cluster_1_H4h
ENSG00000170989	1.38777878078145e-17	213.653521914944	10.7452731931791	2.23074032615796e-21	8.41530723040742e-20	S1PR1	chr1	+	101236888	101241518	3071	protein_coding	sphingosine-1-phosphate_receptor_1
ENSG00000130830	0.9101298099858	213.653521914944	7.6806436166475	2.23074032615796e-21	8.41530723040742e-20	MPP1	chrX	-	154778684	154821007	5396	protein_coding	membrane_protein_palmitoylated_1
ENSG00000236333	1.38777878078145e-17	213.653521914944	10.7452731931791	2.23074032615796e-21	8.41530723040742e-20	TRHDE-AS1	chr12	-	72253508	72274907	8781	processed_transcript	TRHDE_antisense_RNA_1
ENSG00000101443	3.66244545564338	301.946001879237	6.31492564814559	2.48892971662223e-21	9.3764460461408e-20	WFDC2	chr20	+	45469706	45481532	1382	protein_coding	WAP_four-disulfide_core_domain_2
ENSG00000146530	5.49730390528178	354.267470852796	5.97630071511867	2.49548137485032e-21	9.3882672079013e-20	VWDE	chr7	-	12330885	12403941	6490	protein_coding	von_Willebrand_factor_D_and_EGF_domains
ENSG00000103490	210.078917401006	1.38777878078145e-17	-10.7210441590787	2.72728464891892e-21	1.02380816349701e-19	PYCARD	chr16	-	31201485	31203450	1661	protein_coding	PYD_and_CARD_domain_containing
ENSG00000237330	324.754604319539	3.27767348587998	-6.58053627877423	2.72881489343409e-21	1.02380816349701e-19	RNF223	chr1	-	1070966	1074307	1902	protein_coding	ring_finger_protein_223
ENSG00000139865	423.834395649487	7.63772441976772	-5.77272381015347	2.83420136143901e-21	1.06189879619802e-19	TTC6	chr14	+	37595847	38041442	8361	protein_coding	tetratricopeptide_repeat_domain_6
ENSG00000204792	1111.88849102234	37.0685403274115	-4.90229570971075	3.00623691941356e-21	1.1248234220516e-19	LINC01291	chr2	+	74918148	74938418	4176	lincRNA	long_intergenic_non-protein_coding_RNA_1291
ENSG00000153790	1.38777878078145e-17	211.473460654153	10.7304848559197	3.01742131369753e-21	1.12747423298907e-19	C7orf31	chr7	-	25134697	25180356	3837	protein_coding	chromosome_7_open_reading_frame_31
ENSG00000091136	76.1376986259758	1966.422705477	4.68841513303548	3.03567849052712e-21	1.13275704434174e-19	LAMB1	chr7	-	107923799	108003255	8140	protein_coding	laminin_subunit_beta_1
ENSG00000111341	269.710275116339	1.09771269193672	-7.79552698853921	3.06381922198966e-21	1.14170856943005e-19	MGP	chr12	-	14881181	14885926	2639	protein_coding	matrix_Gla_protein
ENSG00000131037	1222.89455124363	42.5186957319358	-4.84224832689881	3.09926832045984e-21	1.15335558972891e-19	EPS8L1	chr19	+	55072020	55087923	5341	protein_coding	EPS8_like_1
ENSG00000061455	373.377094654825	5.45768452873822	-6.06610593572125	3.18801297546683e-21	1.18477763295018e-19	PRDM6	chr5	+	123089121	123194266	9350	protein_coding	PR_domain_containing_6
ENSG00000177707	43.111080472052	1221.93181798154	4.82070506259217	3.27680652387167e-21	1.21613301232112e-19	PVRL3	chr3	+	111070071	111275563	6184	protein_coding	poliovirus_receptor-related_3
ENSG00000146250	8.2495612111708	420.759337305502	5.6500981830316	3.68558235625421e-21	1.36600000511249e-19	PRSS35	chr6	+	83512538	83525704	2440	protein_coding	protease_serine_35
ENSG00000183114	0.9101298099858	209.29339939155	7.65091378305094	3.69814253005937e-21	1.36881046728348e-19	FAM43B	chr1	+	20552439	20555010	2572	protein_coding	family_with_sequence_similarity_43_member_B
ENSG00000160190	1457.75034793918	53.4190058528579	-4.76721964371097	3.7265670268714e-21	1.37747741674718e-19	SLC37A1	chr21	+	42496008	42581440	6814	protein_coding	solute_carrier_family_37_(glucose-6-phosphate_transporter)_member_1
ENSG00000157992	294.480223343811	2.18769296388965	-6.99815565568372	3.86358272264912e-21	1.42620655645065e-19	KRTCAP3	chr2	+	27442366	27446481	1403	protein_coding	keratinocyte_associated_protein_3
ENSG00000198910	170.630479630261	4006.95995346521	4.55249175589263	4.21958205721439e-21	1.55553252219106e-19	L1CAM	chrX	-	153861514	153909223	7423	protein_coding	L1_cell_adhesion_molecule
ENSG00000205890	343.102713920412	4.36767330927077	-6.25805101774102	4.40634802490145e-21	1.62220852788239e-19	RP11-473M20.5	chr16	+	3032481	3039133	3061	antisense	NA
ENSG00000174808	577.958513978694	14.1778906812214	-5.33771813244693	4.42895527085904e-21	1.62835158962426e-19	BTC	chr4	-	74744759	74794686	2816	protein_coding	betacellulin
ENSG00000122641	2.74500333963777	267.065022348336	6.5372376428959	4.58826705337367e-21	1.68467199245433e-19	INHBA	chr7	-	41685114	41703108	7532	protein_coding	inhibin_beta_A
ENSG00000161405	5.49730390528178	344.457195443644	5.93579999485473	4.69747048916359e-21	1.72246847896651e-19	IKZF3	chr17	-	39757715	39864188	10008	protein_coding	IKAROS_family_zinc_finger_3
ENSG00000149575	1.38777878078145e-17	206.023307494139	10.692836901667	5.03348888064935e-21	1.8432220733254e-19	SCN2B	chr11	-	118161951	118176673	5826	protein_coding	sodium_channel_voltage_gated_type_II_beta_subunit
ENSG00000111224	202.73967325355	1.38777878078145e-17	-10.6697738697611	5.5829964003709e-21	2.03901705188048e-19	PARP11	chr12	-	3791047	3873448	6200	protein_coding	poly(ADP-ribose)_polymerase_family_member_11
ENSG00000038945	0.9101298099858	204.933276860708	7.62055838867641	5.5829964003709e-21	2.03901705188048e-19	MSR1	chr8	-	16107878	16567490	7812	protein_coding	macrophage_scavenger_receptor_1
ENSG00000154928	8.2495612111708	413.129123138053	5.62370306846736	5.64352810750955e-21	2.05839080218329e-19	EPHB1	chr3	+	134597801	135260467	6956	protein_coding	EPH_receptor_B1
ENSG00000169067	1.38777878078145e-17	203.843246226784	10.6774982590712	6.1951670583063e-21	2.25063790317677e-19	ACTBL2	chr5	-	57480016	57482809	2794	protein_coding	actin_beta-like_2
ENSG00000260228	201.82226773267	1.38777878078145e-17	-10.6632350494819	6.1951670583063e-21	2.25063790317677e-19	RP11-483P21.2	chr16	-	83789967	83807834	1603	antisense	NA
ENSG00000123892	1.38777878078145e-17	203.843246226784	10.6774982590712	6.1951670583063e-21	2.25063790317677e-19	RAB38	chr11	-	88113242	88175467	1465	protein_coding	RAB38_member_RAS_oncogene_family
ENSG00000181690	1.82754864465077	235.454134433007	6.90964544153607	6.40425454310263e-21	2.3204664583645e-19	PLAG1	chr8	-	56160904	56211324	7833	protein_coding	PLAG1_zinc_finger
ENSG00000132429	1.82754864465077	235.454134433007	6.90964544153607	6.40425454310263e-21	2.3204664583645e-19	POPDC3	chr6	-	105158280	105179995	1881	protein_coding	popeye_domain_containing_3
ENSG00000156113	3.66244545564338	288.865634579474	6.25105896590366	6.51811875144912e-21	2.35861557610003e-19	KCNMA1	chr10	-	76869601	77638595	19248	protein_coding	potassium_channel_calcium_activated_large_conductance_subfamily_M_alpha_member_1
ENSG00000130413	1.38777878078145e-17	202.753215592362	10.6697673463127	6.87745417926516e-21	2.48537276457255e-19	STK33	chr11	-	8391868	8594289	7599	protein_coding	serine/threonine_kinase_33
ENSG00000177675	3.66244545564338	287.775603969929	6.24560689084346	7.0300849088636e-21	2.53719639210837e-19	CD163L1	chr12	-	7346685	7479897	5690	protein_coding	CD163_molecule_like_1
ENSG00000186603	3.66244545564338	286.685573360185	6.24013413371431	7.58400061615373e-21	2.73352032693111e-19	HPDL	chr1	+	45326905	45328533	1629	protein_coding	4-hydroxyphenylpyruvate_dioxygenase-like
ENSG00000137142	1.38777878078145e-17	201.663184957434	10.6619947829265	7.63823450882985e-21	2.74946449250431e-19	IGFBPL1	chr9	-	38408994	38424447	1093	protein_coding	insulin_like_growth_factor_binding_protein-like_1
ENSG00000124466	1239.40784945422	45.7887888640111	-4.75498309452557	7.78317839642877e-21	2.79797632784559e-19	LYPD3	chr19	-	43460787	43465660	2519	protein_coding	LY6/PLAUR_domain_containing_3
ENSG00000153531	696.303818525034	20.7180739007492	-5.06290010561661	7.8336424275754e-21	2.81244125849545e-19	ADPRHL1	chr13	-	113399610	113453524	10924	protein_coding	ADP-ribosylhydrolase_like_1
ENSG00000111716	497.226833101985	10868.7024602261	4.44976590429761	8.28972050987087e-21	2.97230252597078e-19	LDHB	chr12	-	21635342	21757857	2983	protein_coding	lactate_dehydrogenase_B
ENSG00000135298	1.38777878078145e-17	200.573154321994	10.6541801176914	8.48692723203317e-21	3.03904929437688e-19	ADGRB3	chr6	+	68635367	69389511	6490	protein_coding	adhesion_G_protein-coupled_receptor_B3
ENSG00000240225	1.38777878078145e-17	199.483123686033	10.6463228920139	1.04917667046867e-20	3.74719579409857e-19	ZNF542P	chr19	+	56368099	56379828	4690	transcribed_unprocessed_pseudogene	zinc_finger_protein_542_pseudogene
ENSG00000138675	1.38777878078145e-17	199.483123686033	10.6463228920139	1.04917667046867e-20	3.74719579409857e-19	FGF5	chr4	+	80266599	80336680	5998	protein_coding	fibroblast_growth_factor_5
ENSG00000086506	3.66244545564338	282.325450919182	6.21803310705455	1.11199013796443e-20	3.96638661273147e-19	HBQ1	chr16	+	180453	181181	536	protein_coding	hemoglobin_subunit_theta_1
ENSG00000180694	8869.46901361973	408.769000755059	-4.43909853081233	1.12399622657948e-20	4.00401816414021e-19	TMEM64	chr8	-	90621995	90791632	5870	protein_coding	transmembrane_protein_64
ENSG00000131669	3941.16691367599	174.412418896327	-4.4971287343417	1.12939485529919e-20	4.01804500848422e-19	NINJ1	chr9	-	93121489	93134288	2648	protein_coding	ninjurin_1
ENSG00000091947	509.153104158319	11.9978317798155	-5.39362076205099	1.19208209557097e-20	4.23558781786785e-19	TMEM101	chr17	-	44011188	44023946	3029	protein_coding	transmembrane_protein_101
ENSG00000134516	3.66244545564338	281.235420308414	6.21245454039212	1.20129181947953e-20	4.26280339709763e-19	DOCK2	chr5	+	169637247	170083382	12890	protein_coding	dedicator_of_cytokinesis_2
ENSG00000186522	322.002387874543	6995.82380638954	4.44078590306407	1.21111158266978e-20	4.29211077770639e-19	SEPT10	chr2	-	109542982	109614206	4131	protein_coding	septin_10
ENSG00000141485	1.38777878078145e-17	197.303062412522	10.6304788871216	1.29937778425295e-20	4.59827806519091e-19	SLC13A5	chr17	-	6684713	6713567	9020	protein_coding	solute_carrier_family_13_(sodium-dependent_citrate_transporter)_member_5
ENSG00000001561	13.7540369826991	509.051815318742	5.19648069637943	1.30084736362988e-20	4.59827806519091e-19	ENPP4	chr6	+	46129993	46146699	4651	protein_coding	ectonucleotide_pyrophosphatase/phosphodiesterase_4_(putative)
ENSG00000173040	1.82754864465077	226.73388944422	6.85522699162804	1.3473238226957e-20	4.75645089190687e-19	EVC2	chr4	-	5542772	5709548	5509	protein_coding	Ellis_van_Creveld_syndrome_2
ENSG00000267131	348.607146790478	5.45768452873822	-5.96711073783742	1.37151312099339e-20	4.83563876159476e-19	RP11-332H18.5	chr17	-	61361668	61400243	470	antisense	NA
ENSG00000146592	1.38777878078145e-17	196.213031774956	10.622491152382	1.44703435064532e-20	5.08236164458453e-19	CREB5	chr7	+	28299321	28825894	11674	protein_coding	cAMP_responsive_element_binding_protein_5
ENSG00000249641	194.483023544591	1.38777878078145e-17	-10.6098293619636	1.44703435064532e-20	5.08236164458453e-19	HOXC13-AS	chr12	-	53935328	53939643	1408	antisense	HOXC13_antisense_RNA
ENSG00000184185	0.9101298099858	196.213031774956	7.55786157585032	1.44703435064532e-20	5.08236164458453e-19	KCNJ12	chr17	+	21376197	21419872	5617	protein_coding	potassium_channel_inwardly_rectifying_subfamily_J_member_12
ENSG00000066382	611.902516095163	17.4479815520228	-5.12283410240156	1.49257625632401e-20	5.23563005423043e-19	MPPED2	chr11	-	30384493	30586872	8197	protein_coding	metallophosphoesterase_domain_containing_2
ENSG00000128394	1.38777878078145e-17	195.123001136839	10.6144589458042	1.61222092035369e-20	5.64811306122888e-19	APOBEC3F	chr22	+	39040604	39053910	3242	protein_coding	apolipoprotein_B_mRNA_editing_enzyme_catalytic_polypeptide-like_3F
ENSG00000227218	275.214708070018	2.18769296388965	-6.90058754790917	1.64015022659442e-20	5.73864775846986e-19	RP11-203J24.8	chr9	+	127934503	127940952	2520	antisense	NA
ENSG00000146966	5.49730390528178	323.746613991063	5.84637172411131	1.74989804883479e-20	6.11485975108075e-19	DENND2A	chr7	-	140518420	140673993	5148	protein_coding	DENN/MADD_domain_containing_2A
ENSG00000182107	2065.99016469641	87.2099627322389	-4.56435386331623	1.76357207481311e-20	6.15482178038519e-19	TMEM30B	chr14	-	61277370	61281840	4471	protein_coding	transmembrane_protein_30B
ENSG00000132359	179.804535042989	3948.09830209053	4.45564485365301	1.774755195134e-20	6.18600033224084e-19	RAP1GAP2	chr17	+	2777056	3037739	7350	protein_coding	RAP1_GTPase_activating_protein_2
ENSG00000176014	521.996780672936	10973.3453959885	4.39347080085362	1.90538074575481e-20	6.63289568215229e-19	TUBB6	chr18	+	12307669	12344320	4117	protein_coding	tubulin_beta_6_class_V
ENSG00000182742	1.82754864465077	223.463797567332	6.8342789633805	1.97083169810832e-20	6.85206605937759e-19	HOXB4	chr17	-	48575513	48580111	3757	protein_coding	homeobox_B4
ENSG00000105538	26.5977574016326	771.749186911311	4.85185706275804	2.14503962975118e-20	7.44832510830648e-19	RASIP1	chr19	-	48720587	48740721	4149	protein_coding	Ras_interacting_protein_1
ENSG00000085276	189.895995906854	1.38777878078145e-17	-10.5754181643396	2.23611047396686e-20	7.73525460937894e-19	MECOM	chr3	-	169083499	169663618	9103	protein_coding	MDS1_and_EVI1_complex_locus
ENSG00000078098	1.38777878078145e-17	191.852909219103	10.5900904731059	2.23611047396686e-20	7.73525460937894e-19	FAP	chr2	-	162170684	162245151	7003	protein_coding	fibroblast_activation_protein_alpha
ENSG00000158258	189.895995906854	1.38777878078145e-17	-10.5754181643396	2.23611047396686e-20	7.73525460937894e-19	CLSTN2	chr3	+	139935185	140577397	14636	protein_coding	calsyntenin_2
ENSG00000108797	37.6066413200733	998.475548452088	4.72580013132419	2.27150004031323e-20	7.84780434782086e-19	CNTNAP1	chr17	+	42682613	42699814	6045	protein_coding	contactin_associated_protein_1
ENSG00000069702	22.0107186986201	664.926189481786	4.90857314026023	2.31875591461819e-20	8.00101711517126e-19	TGFBR3	chr1	-	91680343	91906335	8705	protein_coding	transforming_growth_factor_beta_receptor_III
ENSG00000112276	6.41472570341761	342.277134240303	5.70881791741133	2.42480633286879e-20	8.35646603511586e-19	BVES	chr6	-	105096822	105137174	5808	protein_coding	blood_vessel_epicardial_substance
ENSG00000077264	1.38777878078145e-17	190.762878578702	10.5818753144166	2.49612331977695e-20	8.59147527123728e-19	PAK3	chrX	+	110944285	111227361	10312	protein_coding	p21_protein_(Cdc42/Rac)-activated_kinase_3
ENSG00000249242	1256.83855311992	49.0588819125952	-4.6758545767338	2.5658910527041e-20	8.82057123005192e-19	TMEM150C	chr4	-	82483170	82562357	3671	protein_coding	transmembrane_protein_150C
ENSG00000163283	1.82754864465077	220.193705686918	6.81302228118661	2.63149597499671e-20	9.03480284748871e-19	ALPP	chr2	+	232378534	232382889	3059	protein_coding	alkaline_phosphatase_placental
ENSG00000180190	2.74500333963777	246.35444063851	6.42083519933559	2.69672722108017e-20	9.2357030270144e-19	TDRP	chr8	-	489792	545781	3613	protein_coding	testis_development_related_protein
ENSG00000144290	244.022921203948	1.09771269193672	-7.65120716492547	2.69672722108017e-20	9.2357030270144e-19	SLC4A10	chr2	+	161424332	161985282	7550	protein_coding	solute_carrier_family_4_sodium_bicarbonate_transporter_member_10
ENSG00000090376	1.38777878078145e-17	189.672847937708	10.5736131080012	2.7877265113397e-20	9.535480943825e-19	IRAK3	chr12	+	66188879	66254622	10004	protein_coding	interleukin_1_receptor_associated_kinase_3
ENSG00000006757	1.82754864465077	219.103675059306	6.80586654694573	2.89986938023243e-20	9.9067463137605e-19	PNPLA4	chrX	-	7898247	7927739	3441	protein_coding	patatin_like_phospholipase_domain_containing_4
ENSG00000167748	1.38777878078145e-17	188.582817296114	10.5653033118751	3.11492445868004e-20	1.06282304637915e-18	KLK1	chr19	-	50819148	50823787	2378	protein_coding	kallikrein_1
ENSG00000184384	20.1759022113556	635.495363630609	4.9680657002387	3.17893777550841e-20	1.08332054230801e-18	MAML2	chr11	-	95976598	96343180	7109	protein_coding	mastermind_like_transcriptional_coactivator_2
ENSG00000175707	289.893195906113	3.27767348587998	-6.41677797787948	3.24475233074113e-20	1.10438036940237e-18	KDF1	chr1	-	26949562	26960406	1793	protein_coding	keratinocyte_differentiation_factor_1
ENSG00000244242	712.817116808857	22.8981358637006	-4.95314043969998	3.43507655333451e-20	1.16771372426764e-18	IFITM10	chr11	-	1732410	1750591	4784	protein_coding	interferon_induced_transmembrane_protein_10
ENSG00000100918	59.6243920261802	1422.49744514613	4.57331994825284	3.56545185033759e-20	1.21053693007573e-18	REC8	chr14	+	24171853	24180257	3844	protein_coding	REC8_meiotic_recombination_protein
ENSG00000081985	0.9101298099858	187.492786653909	7.49231579810244	3.8948393727732e-20	1.32073955105593e-18	IL12RB2	chr1	+	67307364	67396900	4233	protein_coding	interleukin_12_receptor_subunit_beta_2
ENSG00000215252	28.4325721119042	792.45976803029	4.79427539731855	3.930106872385e-20	1.33105750120025e-18	GOLGA8B	chr15	-	34525207	34588503	7670	protein_coding	golgin_A8_family_member_B
ENSG00000188488	3.66244545564338	265.974991734391	6.13200126248077	3.94179109738106e-20	1.33337265644621e-18	SERPINA5	chr14	+	94561442	94593120	3775	protein_coding	serpin_peptidase_inhibitor_clade_A_(alpha-1_antiproteinase_antitrypsin)_member_5
ENSG00000259349	310.076116596736	4.36767330927077	-6.11209174604109	3.98721405380986e-20	1.3470807579094e-18	RP11-15E18.1	chr17	+	60526293	60550798	718	antisense	NA
ENSG00000144152	22.928126699835	669.286311828897	4.85943171238783	4.05065241644171e-20	1.3668342589517e-18	FBLN7	chr2	+	112138385	112188216	6578	protein_coding	fibulin_7
ENSG00000166592	1.82754864465077	214.743552544675	6.77688331634364	4.29278075450812e-20	1.44676180796235e-18	RRAD	chr16	-	66921679	66925644	1709	protein_coding	Ras-related_associated_with_diabetes
ENSG00000112238	1.38777878078145e-17	186.402756011085	10.5485387352349	4.35851072667478e-20	1.46353362019882e-18	PRDM13	chr6	+	99606730	99615578	3276	protein_coding	PR_domain_containing_13
ENSG00000261379	184.391562719279	1.38777878078145e-17	-10.5330111212937	4.35851072667478e-20	1.46353362019882e-18	RP11-395N3.1	chr2	+	226804036	226805061	1026	sense_intronic	NA
ENSG00000175084	1.38777878078145e-17	186.402756011085	10.5485387352349	4.35851072667478e-20	1.46353362019882e-18	DES	chr2	+	219418377	219426739	2464	protein_coding	desmin
ENSG00000134247	5339.29282596202	256.164716197485	-4.38088168987548	4.38961962641058e-20	1.47218206519411e-18	PTGFRN	chr1	+	116910057	116990358	6352	protein_coding	prostaglandin_F2_receptor_inhibitor
ENSG00000104833	16.5062667383555	542.842763615094	5.02830566468649	4.55882784664303e-20	1.52706850926346e-18	TUBB4A	chr19	-	6494319	6502848	3466	protein_coding	tubulin_beta_4A_class_IVa
ENSG00000175287	2.74500333963777	239.814256919075	6.38203583115057	4.58130722117722e-20	1.53273150717269e-18	PHYHD1	chr9	+	128920895	128942041	2915	protein_coding	phytanoyl-CoA_dioxygenase_domain_containing_1
ENSG00000153132	26.5977574016326	744.498422274276	4.80000180114646	4.90181807379005e-20	1.63796960932321e-18	CLGN	chr4	-	140388455	140427968	3127	protein_coding	calmegin
ENSG00000138131	22.0107186986201	643.125577741595	4.86048801003697	4.91094656675677e-20	1.63902841665507e-18	LOXL4	chr10	-	98247690	98268250	3653	protein_coding	lysyl_oxidase_like_4
ENSG00000149131	17.4236759818468	559.193222456155	4.99367503112087	5.4523360946449e-20	1.81751145380399e-18	SERPING1	chr11	+	57597387	57614853	3603	protein_coding	serpin_peptidase_inhibitor_clade_G_(C1_inhibitor)_member_1
ENSG00000183580	2.74500333963777	237.634195676707	6.36886731243004	5.48028123113577e-20	1.82461518326229e-18	FBXL7	chr5	+	15500196	15939795	4854	protein_coding	F-box_and_leucine-rich_repeat_protein_7
ENSG00000172818	234.848866175638	1.09771269193672	-7.59595347453637	5.99679877357522e-20	1.99417125842917e-18	OVOL1	chr11	+	65787022	65797219	3849	protein_coding	ovo-like_zinc_finger_1
ENSG00000182261	1.38777878078145e-17	183.132664078802	10.5230208442726	6.12657727899758e-20	2.03486717089025e-18	NLRP10	chr11	-	7959424	7965426	2531	protein_coding	NLR_family_pyrin_domain_containing_10
ENSG00000155629	13.7540369826991	474.170836391148	5.09409950520376	6.31145819628894e-20	2.09374441322246e-18	PIK3AP1	chr10	-	96593312	96720514	5691	protein_coding	phosphoinositide-3-kinase_adaptor_protein_1
ENSG00000140563	4.57987785670322	283.415481529741	5.91116412835827	6.39354376435868e-20	2.1184198441401e-18	MCTP2	chr15	+	94231538	94483952	12978	protein_coding	multiple_C2_domains_transmembrane_2
ENSG00000168477	125.677606463398	2674.94258336482	4.41026302295656	6.47623588494702e-20	2.14323661939745e-18	TNXB	chr6	-	32041154	32115334	15623	protein_coding	tenascin_XB
ENSG00000224738	731.165226007406	25.0781979910118	-4.85923369720746	6.83375190476345e-20	2.25883426842427e-18	AC099850.1	chr17	+	59106598	59118267	1338	antisense	NA
ENSG00000272674	179.804535042989	1.38777878078145e-17	-10.4966941131347	6.87009393907012e-20	2.26540112012431e-18	PCDHB16	chr5	+	141181399	141186399	5001	protein_coding	protocadherin_beta_16
ENSG00000049249	1.38777878078145e-17	182.042633433405	10.5144135849704	6.87009393907012e-20	2.26540112012431e-18	TNFRSF9	chr1	-	7915894	7943165	6331	protein_coding	tumor_necrosis_factor_receptor_superfamily_member_9
ENSG00000176406	6.41472570341761	324.836644595049	5.6333938628182	7.38012274987012e-20	2.43066773346321e-18	RIMS2	chr8	+	103500748	104256094	13621	protein_coding	regulating_synaptic_membrane_exocytosis_2
ENSG00000180332	1.38777878078145e-17	180.95260278734	10.5057546655564	7.7079102731031e-20	2.52953747518626e-18	KCTD4	chr13	-	45192853	45194717	1865	protein_coding	potassium_channel_tetramerization_domain_containing_4
ENSG00000160801	1.38777878078145e-17	180.95260278734	10.5057546655564	7.7079102731031e-20	2.52953747518626e-18	PTH1R	chr3	+	46877746	46903799	2758	protein_coding	parathyroid_hormone_1_receptor
ENSG00000116141	0.9101298099858	180.95260278734	7.44112508902476	7.7079102731031e-20	2.52953747518626e-18	MARK1	chr1	+	220528183	220664461	5417	protein_coding	MAP/microtubule_affinity-regulating_kinase_1
ENSG00000185272	1.82754864465077	209.29339939155	6.73981577378471	7.82343485622639e-20	2.56438953493542e-18	RBM11	chr21	+	14216130	14228372	2360	protein_coding	RNA_binding_motif_protein_11
ENSG00000100867	1040.33086539457	41.4286646691825	-4.64638177994917	7.8477720858565e-20	2.56793202765591e-18	DHRS2	chr14	+	23630115	23645639	7556	protein_coding	dehydrogenase/reductase_(SDR_family)_member_2
ENSG00000100505	12.8366262054278	449.100132756131	5.11436132965213	7.85291747666856e-20	2.56793202765591e-18	TRIM9	chr14	-	50975262	51096061	8945	protein_coding	tripartite_motif_containing_9
ENSG00000272068	232.096649660096	1.09771269193672	-7.57895611575197	7.8726547703031e-20	2.57132872729342e-18	RP11-284F21.9	chr1	-	156637783	156641004	3222	lincRNA	NA
ENSG00000173482	120.17317274351	2553.94918884665	4.40803158349158	7.9539413678331e-20	2.59479645974826e-18	PTPRM	chr18	+	7566782	8406861	9900	protein_coding	protein_tyrosine_phosphatase_receptor_type_M
ENSG00000182197	413.742935469714	8215.56802639828	4.31111596427587	7.98917000553314e-20	2.60320099907781e-18	EXT1	chr8	-	117794490	118111853	8325	protein_coding	exostosin_glycosyltransferase_1
ENSG00000183688	136.68647368601	2860.24778216904	4.38586972498482	8.17693634439149e-20	2.661229898309e-18	FAM101B	chr17	-	439978	445939	3621	protein_coding	family_with_sequence_similarity_101_member_B
ENSG00000186417	231.179244154155	1.09771269193672	-7.57324553468943	8.62599452735114e-20	2.80405999405064e-18	GLDN	chr15	+	51341629	51408013	7144	protein_coding	gliomedin
ENSG00000106714	1.38777878078145e-17	178.772541493165	10.4882793395579	9.71808681491495e-20	3.14790465838605e-18	CNTNAP3	chr9	-	39072767	39288315	9521	protein_coding	contactin_associated_protein-like_3
ENSG00000154822	0.9101298099858	178.772541493165	7.42364976302628	9.71808681491495e-20	3.14790465838605e-18	PLCL2	chr3	+	16802651	17090594	5146	protein_coding	phospholipase_C_like_2
ENSG00000149970	0.9101298099858	178.772541493165	7.42364976302628	9.71808681491495e-20	3.14790465838605e-18	CNKSR2	chrX	+	21374418	21654695	7160	protein_coding	connector_enhancer_of_kinase_suppressor_of_Ras_2
ENSG00000130818	7.33214453489527	342.277134240303	5.51960761878231	9.74326131604956e-20	3.15234622885505e-18	ZNF426	chr19	-	9523224	9538627	7527	protein_coding	zinc_finger_protein_426
ENSG00000164023	34.8544211735064	877.482153636745	4.64871480211677	9.76190818749953e-20	3.15466788559841e-18	SGMS2	chr4	+	107824563	107915047	7635	protein_coding	sphingomyelin_synthase_2
ENSG00000206337	6.41472570341761	320.476522178235	5.6139052097053	1.03375774953019e-19	3.3367807358955e-18	HCP5	chr6	+	31400702	31477506	3138	sense_overlapping	HLA_complex_P5_(non-protein_coding)
ENSG00000196581	7.33214453489527	341.187103638448	5.51500739331698	1.03848792871777e-19	3.34811917088716e-18	AJAP1	chr1	+	4654732	4792534	12405	protein_coding	adherens_junctions_associated_protein_1
ENSG00000198108	1.38777878078145e-17	177.682510845033	10.4794616508535	1.09208203316123e-19	3.51678547938724e-18	CHSY3	chr5	+	129904472	130186634	3938	protein_coding	chondroitin_sulfate_synthase_3
ENSG00000042493	200.904862211224	4027.67053450439	4.32445942792999	1.19188681647062e-19	3.83369349003025e-18	CAPG	chr2	-	85394748	85418432	2607	protein_coding	capping_protein_(actin_filament)_gelsolin-like
ENSG00000148120	1364.17499146142	58.8691605930386	-4.53164673945832	1.20604256749827e-19	3.87469353373481e-18	C9orf3	chr9	+	94726701	95087218	10742	protein_coding	chromosome_9_open_reading_frame_3
ENSG00000107014	175.217507347133	1.38777878078145e-17	-10.4594392359643	1.22791313181314e-19	3.93576212564023e-18	RLN2	chr9	-	5299868	5304969	1278	protein_coding	relaxin_2
ENSG00000186469	1.38777878078145e-17	176.59248019619	10.470589737233	1.22791313181314e-19	3.93576212564023e-18	GNG2	chr14	+	51826195	51979342	6379	protein_coding	guanine_nucleotide_binding_protein_(G_protein)_gamma_2
ENSG00000182985	293.562817856668	4.36767330927077	-6.03317298366869	1.24909803666089e-19	3.99900408686975e-18	CADM1	chr11	-	115169218	115504957	11017	protein_coding	cell_adhesion_molecule_1
ENSG00000143126	34723.7895215361	1830.16888277603	-4.24578895050105	1.28216668664359e-19	4.10010070341689e-18	CELSR2	chr1	+	109250019	109275750	12349	protein_coding	cadherin_EGF_LAG_seven-pass_G-type_receptor_2
ENSG00000198113	65.1288279528006	1457.37842377542	4.48114138852026	1.28843881122135e-19	4.1153723283854e-18	TOR4A	chr9	+	137277749	137282641	4148	protein_coding	torsin_family_4_member_A
ENSG00000086205	1.82754864465077	203.843246226784	6.70177067327336	1.30465810619193e-19	4.15752057686954e-18	FOLH1	chr11	-	49146635	49208670	3824	protein_coding	folate_hydrolase_(prostate-specific_membrane_antigen)_1
ENSG00000111186	1.82754864465077	203.843246226784	6.70177067327336	1.30465810619193e-19	4.15752057686954e-18	WNT5B	chr12	+	1529891	1647243	4305	protein_coding	wingless-type_MMTV_integration_site_family_member_5B
ENSG00000185499	3064.12729930175	149.341713706578	-4.35771908703044	1.30630213630389e-19	4.15794155677005e-18	MUC1	chr1	-	155185824	155192916	4717	protein_coding	mucin_1_cell_surface_associated
ENSG00000154319	35.7718279381021	884.022337142604	4.62208339771624	1.3317233891511e-19	4.23395663873345e-18	FAM167A	chr8	-	11421463	11474715	5033	protein_coding	family_with_sequence_similarity_167_member_A
ENSG00000167619	5.49730390528178	295.405818232685	5.71425486856665	1.34386348508487e-19	4.26762005811998e-18	TMEM145	chr19	+	42313325	42325062	2640	protein_coding	transmembrane_protein_145
ENSG00000146904	592.637001384718	19.628043016514	-4.90790302693368	1.34907718671775e-19	4.27923549157148e-18	EPHA1	chr7	-	143390289	143408892	4733	protein_coding	EPH_receptor_A1
ENSG00000163171	53.2025494404424	1226.29194031219	4.52323933420296	1.35638791651382e-19	4.29746821336942e-18	CDC42EP3	chr2	-	37641882	37738468	10406	protein_coding	CDC42_effector_protein_(Rho_GTPase_binding)_3
ENSG00000162551	3.66244545564338	250.714563112039	6.04679507521949	1.37231003726332e-19	4.34291120078006e-18	ALPL	chr1	+	21509372	21578412	3007	protein_coding	alkaline_phosphatase_liver/bone/kidney
ENSG00000160117	0.9101298099858	175.502449546625	7.39703335111711	1.38140227328978e-19	4.36666022043013e-18	ANKLE1	chr19	+	17281645	17287646	3569	protein_coding	ankyrin_repeat_and_LEM_domain_containing_1
ENSG00000137968	1.82754864465077	202.753215592362	6.69403976051484	1.44699452612951e-19	4.56874815879308e-18	SLC44A5	chr1	-	75202131	75611116	6299	protein_coding	solute_carrier_family_44_member_5
ENSG00000165511	2.74500333963777	226.73388944422	6.30115903712484	1.50324318483814e-19	4.74090491126533e-18	C10orf25	chr10	-	44997698	45000888	3078	antisense	chromosome_10_open_reading_frame_25
ENSG00000164099	24.7629422886952	666.016220068592	4.74191270406388	1.66746942303224e-19	5.25281518932527e-18	PRSS12	chr4	-	118280038	118353003	5725	protein_coding	protease_serine_12
ENSG00000181392	310.993522080615	5.45768452873822	-5.80245890118356	1.66985223572882e-19	5.25430278429957e-18	SYNE4	chr19	-	36003307	36008793	2528	protein_coding	spectrin_repeat_containing_nuclear_envelope_family_member_4
ENSG00000275004	1.38777878078145e-17	174.412418896327	10.4526805385189	1.75127674624056e-19	5.50421277695561e-18	ZNF280B	chr22	-	22484421	22509154	5723	protein_coding	zinc_finger_protein_280B
ENSG00000142227	28.4325721119042	739.048269345878	4.69362168961007	1.83947192128516e-19	5.77480791178804e-18	EMP3	chr19	+	48321509	48330553	1667	protein_coding	epithelial_membrane_protein_3
ENSG00000163435	2045.80724468983	97.0202397017759	-4.39659433725035	1.88602875499643e-19	5.91421628177387e-18	ELF3	chr1	+	202007945	202017188	7191	protein_coding	E74-like_factor_3_(ets_domain_transcription_factor_epithelial-specific_)
ENSG00000117245	3.66244545564338	247.444471257337	6.0278629779607	1.93462902291613e-19	6.0597076035554e-18	KIF17	chr1	-	20664014	20718017	4470	protein_coding	kinesin_family_member_17
ENSG00000137965	1.38777878078145e-17	173.322388245284	10.4436418734133	1.97351998814927e-19	6.17449069329842e-18	IFI44	chr1	+	78649796	78664078	2038	protein_coding	interferon_induced_protein_44
ENSG00000105270	50.4503309159443	1148.89976893498	4.50563661182823	1.99469985093632e-19	6.23366370461359e-18	CLIP3	chr19	-	36014660	36033343	3772	protein_coding	CAP-Gly_domain_containing_linker_protein_3
ENSG00000149231	45.8632995896368	1054.06710820639	4.51851197097588	2.06020340935449e-19	6.43106174354798e-18	CCDC82	chr11	-	96352769	96389923	6850	protein_coding	coiled-coil_domain_containing_82
ENSG00000214189	4.57987785670322	268.155052962037	5.83134688330798	2.06594925228197e-19	6.44168598492136e-18	ZNF788	chr19	+	12092263	12137235	7434	protein_coding	zinc_finger_family_member_788
ENSG00000179399	0.9101298099858	172.232357593483	7.36991664619792	2.22524447643361e-19	6.93051510151764e-18	GPC5	chr13	+	91398607	92873682	3544	protein_coding	glypican_5
ENSG00000196754	28.4325721119042	730.328024659716	4.67650041414374	2.41391181516473e-19	7.50961412091009e-18	S100A2	chr1	-	153561108	153567890	1567	protein_coding	S100_calcium_binding_protein_A2
ENSG00000254221	168.795668537274	1.38777878078145e-17	-10.4056113441746	2.51053222982252e-19	7.80137252568917e-18	PCDHGB1	chr5	+	141350102	141512979	4773	protein_coding	protocadherin_gamma_subfamily_B_1
ENSG00000104267	1814.62107004346	86.1199319403898	-4.39532281146878	2.59122505025402e-19	8.04303387212592e-18	CA2	chr8	+	85463852	85481493	2123	protein_coding	carbonic_anhydrase_II
ENSG00000114279	4.57987785670322	264.884961120201	5.81365314977741	2.62978428179382e-19	8.15351719657406e-18	FGF12	chr3	-	192139395	192767764	7355	protein_coding	fibroblast_growth_factor_12
ENSG00000171587	219.252972540014	1.09771269193672	-7.49687466814553	2.65291960661703e-19	8.21598447089807e-18	DSCAM	chr21	-	40010999	40847139	8577	protein_coding	Down_syndrome_cell_adhesion_molecule
ENSG00000149054	1.38777878078145e-17	170.052296287562	10.4161810583395	2.8340544243873e-19	8.75722817135676e-18	ZNF215	chr11	+	6926404	6984632	4025	protein_coding	zinc_finger_protein_215
ENSG00000136244	0.9101298099858	170.052296287562	7.3515514818079	2.8340544243873e-19	8.75722817135676e-18	IL6	chr7	+	22725884	22732002	2069	protein_coding	interleukin_6
ENSG00000188761	218.335567028227	1.09771269193672	-7.49082906451125	2.92004630933334e-19	9.01281633591202e-18	BCL2L15	chr1	-	113878168	113887547	4251	protein_coding	BCL2-like_15
ENSG00000211445	145.860529519153	2856.9776904255	4.29058758911525	3.15481561240709e-19	9.72652288753447e-18	GPX3	chr5	+	151020438	151028993	3163	protein_coding	glutathione_peroxidase_3
ENSG00000162631	0.9101298099858	168.962265633416	7.34228047997265	3.20115991977424e-19	9.85835374621629e-18	NTNG1	chr1	+	107140007	107483458	9138	protein_coding	netrin_G1
ENSG00000171303	4.57987785670322	261.614869276126	5.79573971663892	3.35536315637109e-19	1.03216825686086e-17	KCNK3	chr2	+	26692690	26733420	6223	protein_coding	potassium_channel_two_pore_domain_subfamily_K_member_3
ENSG00000106991	39.4414545240862	919.993346419682	4.53921958633096	3.46784417992491e-19	1.06557746136441e-17	ENG	chr9	-	127815012	127854756	3935	protein_coding	endoglin
ENSG00000127152	677.955709314648	25.0781979910118	-4.75024761970954	3.61421357155127e-19	1.109313475795e-17	BCL11B	chr14	-	99169287	99271524	7855	protein_coding	B-cell_CLL/lymphoma_11B_(zinc_finger_protein)
ENSG00000107957	77.9725102828509	1606.71261351151	4.36267669810572	3.71355850911684e-19	1.1385348111396e-17	SH3PXD2A	chr10	-	103594027	103855543	11756	protein_coding	SH3_and_PX_domains_2A
ENSG00000185904	29.3499793347138	733.598116417133	4.63733761393186	3.74626935943209e-19	1.14655121595514e-17	LINC00839	chr10	+	42475543	42495336	2337	lincRNA	long_intergenic_non-protein_coding_RNA_839
ENSG00000236081	1.82754864465077	194.032970498163	6.6306541836214	3.7480438643819e-19	1.14655121595514e-17	ELFN1-AS1	chr7	-	1738630	1742291	989	lincRNA	ELFN1_antisense_RNA_1
ENSG00000185630	3945.75394094754	206.023307494139	-4.25865045615799	3.88056098660845e-19	1.18577008547466e-17	PBX1	chr1	+	164555584	164899296	21249	protein_coding	pre-B-cell_leukemia_homeobox_1
ENSG00000144681	1.38777878078145e-17	166.782204322688	10.3881873844561	4.09153489746015e-19	1.24746453675224e-17	STAC	chr3	+	36380344	36548007	4396	protein_coding	SH3_and_cysteine_rich_domain
ENSG00000196263	1.38777878078145e-17	166.782204322688	10.3881873844561	4.09153489746015e-19	1.24746453675224e-17	ZNF471	chr19	+	56507843	56530221	6783	protein_coding	zinc_finger_protein_471
ENSG00000155962	7.33214453489527	320.476522178235	5.42469491107628	4.12027595147751e-19	1.25424043463722e-17	CLIC2	chrX	-	155276211	155334657	2840	protein_coding	chloride_intracellular_channel_2
ENSG00000115641	406.403691697061	7512.49830173055	4.20786321499458	4.12288045130014e-19	1.25424043463722e-17	FHL2	chr2	-	105357712	105438513	6626	protein_coding	four_and_a_half_LIM_domains_2
ENSG00000141376	6462.19710190006	347.727287247748	-4.21554054855614	4.21345472001165e-19	1.28037810226564e-17	BCAS3	chr17	+	60677453	61392838	14103	protein_coding	breast_carcinoma_amplified_sequence_3
ENSG00000166963	17.4236759818468	509.051815318742	4.85817039666505	4.30901740846197e-19	1.30797227097255e-17	MAP1A	chr15	+	43510958	43531620	10629	protein_coding	microtubule_associated_protein_1A
ENSG00000261068	277.049519052662	4.36767330927077	-5.94968608984845	4.4618138301802e-19	1.35285934006379e-17	RP11-7K24.3	chr6	-	42092233	42094259	2027	lincRNA	NA
ENSG00000157064	74.3028869379177	1539.13071743039	4.37011251075144	4.52373859677842e-19	1.37012483645378e-17	NMNAT2	chr1	-	183248237	183418602	7165	protein_coding	nicotinamide_nucleotide_adenylyltransferase_2
ENSG00000157502	0.9101298099858	165.692173666079	7.31410456096829	4.62989475238913e-19	1.39919489654345e-17	MUM1L1	chrX	+	106168305	106208956	4343	protein_coding	melanoma_associated_antigen_(mutated)_1-like_1
ENSG00000119865	1.38777878078145e-17	165.692173666079	10.3787341374999	4.62989475238913e-19	1.39919489654345e-17	CNRIP1	chr2	-	68284171	68320051	3548	protein_coding	cannabinoid_receptor_interacting_protein_1
ENSG00000135074	33.9370143556858	795.729859785536	4.5459788747104	5.11215408267476e-19	1.54324203542962e-17	ADAM19	chr5	-	157395534	157575775	7704	protein_coding	ADAM_metallopeptidase_domain_19
ENSG00000139915	0.9101298099858	164.602143008622	7.3045889629124	5.24231469318131e-19	1.57884938182973e-17	MDGA2	chr14	-	46839629	47674954	8226	protein_coding	MAM_domain_containing_glycosylphosphatidylinositol_anchor_2
ENSG00000215146	0.9101298099858	164.602143008622	7.3045889629124	5.24231469318131e-19	1.57884938182973e-17	RP11-313J2.1	chr10	-	42331866	42367974	7024	transcribed_unprocessed_pseudogene	NA
ENSG00000008323	756.852578876083	30.5283535964229	-4.6265207544978	5.24794067086137e-19	1.57884938182973e-17	PLEKHG6	chr12	+	6310436	6328506	4260	protein_coding	pleckstrin_homology_and_RhoGEF_domain_containing_G6
ENSG00000214049	10.0843900675811	373.8880216445	5.19415575179672	5.2530714678528e-19	1.57884938182973e-17	UCA1	chr19	+	15828961	15836320	2299	processed_transcript	urothelial_cancer_associated_1_(non-protein_coding)
ENSG00000166147	144.943123942517	2769.77524393037	4.25496300873358	5.46311285494402e-19	1.64018631685388e-17	FBN1	chr15	-	48408306	48645849	16057	protein_coding	fibrillin_1
ENSG00000140931	42.193674037534	954.874325104942	4.49589925257903	5.47436271698718e-19	1.64177152758849e-17	CMTM3	chr16	+	66603874	66613892	3163	protein_coding	CKLF-like_MARVEL_transmembrane_domain_containing_3
ENSG00000152939	1450.4111042946	69.7694695425418	-4.37543513990386	5.70291989390727e-19	1.70845315906693e-17	MARVELD2	chr5	+	69415112	69444330	4898	protein_coding	MARVEL_domain_containing_2
ENSG00000277778	2.74500333963777	212.563491284772	6.20810243263618	5.77574820524968e-19	1.72650925426708e-17	PGM5P2	chr9	-	41006999	41074617	1980	lincRNA	phosphoglucomutase_5_pseudogene_2
ENSG00000123201	210.996322917089	1.09771269193672	-7.4415299573328	5.77574820524968e-19	1.72650925426708e-17	GUCY1B2	chr13	-	50994511	51080862	4060	unitary_pseudogene	guanylate_cyclase_1_soluble_beta_2_(pseudogene)
ENSG00000143382	111.916522001281	2177.88863828524	4.28081885494699	5.80451804069097e-19	1.73322530550534e-17	ADAMTSL4	chr1	+	150549369	150560937	6432	protein_coding	ADAMTS_like_4
ENSG00000107719	18.3410849555724	519.952121224708	4.81524094895457	5.90864755812814e-19	1.76240473423082e-17	PALD1	chr10	+	70478821	70568449	4555	protein_coding	phosphatase_domain_containing_paladin_1
ENSG00000261437	162.373829681712	1.38777878078145e-17	-10.349697000387	5.93943100876395e-19	1.76966730413887e-17	RP11-22C11.2	chr8	-	94637285	94639467	2183	antisense	NA
ENSG00000180815	4.57987785670322	255.074685580953	5.7592314420845	5.98035732330243e-19	1.77993297346472e-17	MAP3K15	chrX	-	19360056	19515261	5573	protein_coding	mitogen-activated_protein_kinase_kinase_kinase_15
ENSG00000163071	232.096649660096	2.18769296388965	-6.65488364613439	6.10866367900827e-19	1.81615524147466e-17	SPATA18	chr4	+	52051331	52097292	4941	protein_coding	spermatogenesis_associated_18
ENSG00000185432	1373.34904601901	65.4093460398824	-4.38961696727852	6.27160716237223e-19	1.86258605369761e-17	METTL7A	chr12	+	50923472	50932517	4083	protein_coding	methyltransferase_like_7A
ENSG00000198535	210.078917401006	1.09771269193672	-7.43524741061954	6.37663894378918e-19	1.89173621999079e-17	C2CD4A	chr15	+	62066977	62070917	3445	protein_coding	C2_calcium-dependent_domain_containing_4A
ENSG00000157423	1.82754864465077	188.582817296114	6.58957572607717	6.46281385586638e-19	1.91523538631661e-17	HYDIN	chr16	-	70807378	71230722	23408	protein_coding	HYDIN_axonemal_central_pair_apparatus_protein
ENSG00000108602	161.456424126895	1.38777878078145e-17	-10.3415293508509	6.73347258747569e-19	1.99329633614821e-17	ALDH3A1	chr17	-	19737984	19748943	3918	protein_coding	aldehyde_dehydrogenase_3_family_member_A1
ENSG00000204301	11.9192148715908	388.05841941876	5.0095070092146	6.89753635167993e-19	2.03966824954355e-17	NOTCH4	chr6	-	32194843	32224067	9748	protein_coding	notch_4
ENSG00000198963	1.38777878078145e-17	162.422081691105	10.3499969615646	7.63850922557727e-19	2.25635491098389e-17	RORB	chr9	+	74497365	74693177	9591	protein_coding	RAR-related_orphan_receptor_B
ENSG00000127528	23.8455345590566	602.794445999715	4.65221831850307	7.84955342870145e-19	2.31620782020084e-17	KLF2	chr19	+	16324817	16327874	2018	protein_coding	Kruppel-like_factor_2
ENSG00000168676	0.9101298099858	161.332051031016	7.2756596990226	8.6707402020066e-19	2.55577734507378e-17	KCTD19	chr16	-	67289428	67326763	7383	protein_coding	potassium_channel_tetramerization_domain_containing_19
ENSG00000143578	2460.47451022641	129.721161419637	-4.24422710292682	9.2995278655729e-19	2.73818325300985e-17	CREB3L4	chr1	+	153967534	153974363	2904	protein_coding	cAMP_responsive_element_binding_protein_3-like_4
ENSG00000039600	3.66244545564338	228.913950693586	5.91561875869796	9.6444143180743e-19	2.83669559530868e-17	SOX30	chr5	-	157625679	157671480	3471	protein_coding	SRY-box_30
ENSG00000007264	379.79893297768	10.9078032090939	-5.10690514710531	9.67063950654056e-19	2.84137026783517e-17	MATK	chr19	-	3777970	3802129	4141	protein_coding	megakaryocyte-associated_tyrosine_kinase
ENSG00000164176	0.9101298099858	160.24202037002	7.26588624863005	9.84882990336623e-19	2.88447999118716e-17	EDIL3	chr5	-	83940554	84384793	5738	protein_coding	EGF-like_repeats_and_discoidin_I-like_domains_3
ENSG00000179673	0.9101298099858	160.24202037002	7.26588624863005	9.84882990336623e-19	2.88447999118716e-17	RPRML	chr17	-	46978156	46979248	1093	protein_coding	reprimo-like
ENSG00000137752	0.9101298099858	160.24202037002	7.26588624863005	9.84882990336623e-19	2.88447999118716e-17	CASP1	chr11	-	105025443	105035250	3698	protein_coding	caspase_1
ENSG00000136859	1.82754864465077	185.312725367632	6.56435523697095	1.00808807907875e-18	2.94930109178136e-17	ANGPTL2	chr9	-	127087332	127122883	3889	protein_coding	angiopoietin_like_2
ENSG00000187122	821.070961006492	34.8884781067139	-4.55208371641016	1.04496770710038e-18	3.053948662377e-17	SLIT1	chr10	-	96998038	97185920	9103	protein_coding	slit_guidance_ligand_1
ENSG00000136274	2.74500333963777	207.113338127086	6.17064995817746	1.05219524767138e-18	3.07180695395018e-17	NACAD	chr7	-	45080438	45088914	4917	protein_coding	NAC_alpha_domain_containing
ENSG00000143412	2185.25287382012	114.460731522431	-4.25348822710086	1.08085680474628e-18	3.15213605379932e-17	ANXA9	chr1	+	150982017	150995634	1826	protein_coding	annexin_A9
ENSG00000081853	265.123247648071	4.36767330927077	-5.88623619053991	1.1413740020494e-18	3.32509813880938e-17	PCDHGA2	chr5	+	141338760	141512979	6724	protein_coding	protocadherin_gamma_subfamily_A_2
ENSG00000133863	3.66244545564338	226.73388944422	5.90182050217394	1.16046250800565e-18	3.37713009869453e-17	TEX15	chr8	-	30831544	30890606	11663	protein_coding	testis_expressed_15
ENSG00000167244	29.3499793347138	696.53707649185	4.56256006957989	1.20959942817339e-18	3.51640527211378e-17	IGF2	chr11	-	2129112	2141238	6259	protein_coding	insulin_like_growth_factor_2
ENSG00000175556	1.38777878078145e-17	158.061959045245	10.3107680242749	1.27319768305812e-18	3.69348201284612e-17	LONRF3	chrX	+	118974614	119018355	4041	protein_coding	LON_peptidase_N-terminal_domain_and_ring_finger_3
ENSG00000105894	1.38777878078145e-17	158.061959045245	10.3107680242749	1.27319768305812e-18	3.69348201284612e-17	PTN	chr7	-	137227341	137343865	1713	protein_coding	pleiotrophin
ENSG00000126460	319.250171428186	7.63772441976772	-5.36405708286703	1.38641039303314e-18	4.01766830545885e-17	PRRG2	chr19	+	49580646	49591015	1701	protein_coding	proline_rich_Gla_(G-carboxyglutamic_acid)_2
ENSG00000167105	3.66244545564338	224.553828193347	5.88788900064252	1.39824788483955e-18	4.04770685062867e-17	TMEM92	chr17	+	50271406	50281485	3101	protein_coding	transmembrane_protein_92
ENSG00000196159	25.6803498996692	622.414996580738	4.59204032484009	1.40339496878842e-18	4.05486368050738e-17	FAT4	chr4	+	125316399	125492932	16439	protein_coding	FAT_atypical_cadherin_4
ENSG00000196684	672.451276550198	27.258260206801	-4.61876498678637	1.40366903888696e-18	4.05486368050738e-17	HSH2D	chr19	+	16134028	16158575	3398	protein_coding	hematopoietic_SH2_domain_containing
ENSG00000179046	1.38777878078145e-17	156.971928381433	10.3007918235843	1.44905371662968e-18	4.17719352841014e-17	TRIML2	chr4	-	188091273	188109603	3050	protein_coding	tripartite_motif_family_like_2
ENSG00000196569	0.9101298099858	156.971928381433	7.23616224705269	1.44905371662968e-18	4.17719352841014e-17	LAMA2	chr6	+	128883141	129516569	10094	protein_coding	laminin_subunit_alpha_2
ENSG00000198795	1.38777878078145e-17	155.88189771665	10.2907461570784	1.65031117727269e-18	4.72762580064336e-17	ZNF521	chr18	-	25061926	25352190	6223	protein_coding	zinc_finger_protein_521
ENSG00000169297	1.38777878078145e-17	155.88189771665	10.2907461570784	1.65031117727269e-18	4.72762580064336e-17	NR0B1	chrX	-	30304206	30309598	2203	protein_coding	nuclear_receptor_subfamily_0_group_B_member_1
ENSG00000184005	1.38777878078145e-17	155.88189771665	10.2907461570784	1.65031117727269e-18	4.72762580064336e-17	ST6GALNAC3	chr1	+	76074719	76634601	7237	protein_coding	ST6_(alpha-N-acetyl-neuraminyl-23-beta-galactosyl-13)-N-acetylgalactosaminide_alpha-26-sialyltransferase_3
ENSG00000249346	154.117179649008	1.38777878078145e-17	-10.2744681014293	1.65031117727269e-18	4.72762580064336e-17	LINC01016	chr6	-	33867506	33896914	3796	lincRNA	long_intergenic_non-protein_coding_RNA_1016
ENSG00000163623	0.9101298099858	155.88189771665	7.22611658054678	1.65031117727269e-18	4.72762580064336e-17	NKX6-1	chr4	-	84491987	84498450	3086	protein_coding	NK6_homeobox_1
ENSG00000048052	1.38777878078145e-17	155.88189771665	10.2907461570784	1.65031117727269e-18	4.72762580064336e-17	HDAC9	chr7	+	18086949	19002416	16827	protein_coding	histone_deacetylase_9
ENSG00000148057	278.884330034377	5.45768452873822	-5.64531143629524	1.69418986613147e-18	4.84809567383401e-17	IDNK	chr9	+	83623049	83644130	1814	protein_coding	idnK_gluconokinase_homolog_(E._coli)
ENSG00000243587	316.497954980437	7.63772441976772	-5.35157103043453	1.69589034516138e-18	4.84809567383401e-17	C6orf183	chr6	+	109165833	109271014	4362	polymorphic_pseudogene	chromosome_6_open_reading_frame_183
ENSG00000104870	10.0843900675811	354.267470852796	5.11641349959768	1.7238535386074e-18	4.92291756648412e-17	FCGRT	chr19	+	49506816	49526333	4173	protein_coding	Fc_fragment_of_IgG_receptor_transporter_alpha
ENSG00000259977	199.987456689202	1.09771269193672	-7.36427107421151	1.7540457086594e-18	4.99875762008727e-17	AL121578.2	chrX	+	37906147	37949405	710	lincRNA	NA
ENSG00000154678	2.74500333963777	201.663184957434	6.13219924262544	1.7540457086594e-18	4.99875762008727e-17	PDE1C	chr7	-	31751179	32299329	13821	protein_coding	phosphodiesterase_1C
ENSG00000158023	76.1376986259758	1481.35909658192	4.2797911667293	1.77290381710971e-18	5.04726996628719e-17	WDR66	chr12	+	121917862	122003927	16115	protein_coding	WD_repeat_domain_66
ENSG00000164318	1.82754864465077	179.862572140597	6.52131587636641	1.77735342768025e-18	5.04948312134654e-17	EGFLAM	chr5	+	38258409	38465021	5724	protein_coding	EGF-like_fibronectin_type_III_and_laminin_G_domains
ENSG00000174837	1.82754864465077	179.862572140597	6.52131587636641	1.77735342768025e-18	5.04948312134654e-17	ADGRE1	chr19	+	6887566	6940459	3707	protein_coding	adhesion_G_protein-coupled_receptor_E1
ENSG00000197016	1.38777878078145e-17	154.791867050879	10.2806300505676	1.88080156515994e-18	5.3323632828313e-17	ZNF470	chr19	+	56567511	56588911	9627	protein_coding	zinc_finger_protein_470
ENSG00000061337	0.9101298099858	154.791867050879	7.21600047403591	1.88080156515994e-18	5.3323632828313e-17	LZTS1	chr8	-	20246165	20303963	5706	protein_coding	leucine_zipper_putative_tumor_suppressor_1
ENSG00000118242	3841.16971915577	215.833583173971	-4.15282190489078	1.9183307884328e-18	5.43316323508656e-17	MREG	chr2	-	215942805	216034096	3056	protein_coding	melanoregulin
ENSG00000120318	32.1022005461845	732.508085831341	4.5064321518227	1.95477883196091e-18	5.53069677548939e-17	ARAP3	chr5	-	141653401	141682221	6186	protein_coding	ArfGAP_with_RhoGAP_domain_ankyrin_repeat_and_PH_domain_3
ENSG00000187957	6.41472570341761	279.05535908624	5.41431605066786	1.97265204416942e-18	5.57552968825315e-17	DNER	chr2	-	229357629	229714558	3935	protein_coding	delta/notch_like_EGF_repeat_containing
ENSG00000154134	29.3499793347138	680.186617695391	4.52829636706252	2.01503688840598e-18	5.6894794115044e-17	ROBO3	chr11	+	124865386	124881470	7026	protein_coding	roundabout_guidance_receptor_3
ENSG00000100033	1988.9281064877	106.83051642847	-4.21711135683946	2.04772190462668e-18	5.77583590760394e-17	PRODH	chr22	-	18912777	18936553	8776	protein_coding	proline_dehydrogenase_(oxidase)_1
ENSG00000155380	229.344433141107	4029.8505956664	4.13435368261231	2.07540504291683e-18	5.84792152512866e-17	SLC16A1	chr1	-	112911847	112957013	5312	protein_coding	solute_carrier_family_16_(monocarboxylate_transporter)_member_1
ENSG00000223865	1.38777878078145e-17	153.701836384102	10.2704425092242	2.14495908835656e-18	6.03771953826958e-17	HLA-DPB1	chr6	+	33075926	33087201	2791	protein_coding	major_histocompatibility_complex_class_II_DP_beta_1
ENSG00000169242	1297.20439318402	65.4093460398824	-4.30733254455553	2.21151033873429e-18	6.21868566723227e-17	EFNA1	chr1	+	155127460	155134857	2539	protein_coding	ephrin-A1
ENSG00000182732	218.335567028227	2.18769296388965	-6.56675659489367	2.24202956076253e-18	6.29806485705112e-17	RGS6	chr14	+	71932439	72566529	8937	protein_coding	regulator_of_G-protein_signaling_6
ENSG00000124134	2.74500333963777	199.483123686033	6.11652735171278	2.39560511289158e-18	6.72260573567667e-17	KCNS1	chr20	-	45092310	45101112	4538	protein_coding	potassium_voltage-gated_channel_modifier_subfamily_S_member_1
ENSG00000223573	1542.15164984392	80.669777921781	-4.25480421897987	2.40473778192561e-18	6.74135512137983e-17	TINCR	chr19	-	5558167	5568034	3925	lincRNA	tissue_differentiation-inducing_non-protein_coding_RNA
ENSG00000166257	1.82754864465077	176.59248019619	6.49486215143514	2.51341864945469e-18	7.03885196320298e-17	SCN3B	chr11	-	123629187	123655244	9464	protein_coding	sodium_channel_voltage_gated_type_III_beta_subunit
ENSG00000124171	4542.06748623076	262.704899891071	-4.11123345640732	2.7018873293579e-18	7.55896271054644e-17	PARD6B	chr20	+	50731544	50756795	4726	protein_coding	par-6_family_cell_polarity_regulator_beta
ENSG00000090776	150.447557381933	2676.03261394605	4.15156598386207	2.72891141212665e-18	7.62680820578201e-17	EFNB1	chrX	+	68828997	68842147	3314	protein_coding	ephrin-B1
ENSG00000177685	1516.46429709178	79.5797471054497	-4.25017153382076	2.75421091048177e-18	7.68970093900094e-17	CRACR2B	chr11	+	826144	831991	3913	protein_coding	calcium_release_activated_channel_regulator_2B
ENSG00000172935	0.9101298099858	151.521775047461	7.18521945946546	2.79563523707797e-18	7.79744063436929e-17	MRGPRF	chr11	-	69004395	69013409	2746	protein_coding	MAS_related_GPR_family_member_F
ENSG00000165626	651.350950947055	27.258260206801	-4.57277946661442	2.80772982125809e-18	7.82323990014375e-17	BEND7	chr10	-	13438484	13528974	9815	protein_coding	BEN_domain_containing_7
ENSG00000077616	1.82754864465077	175.502449546625	6.48593534185088	2.82420020317022e-18	7.86116698252877e-17	NAALAD2	chr11	+	90131515	90192894	7254	protein_coding	N-acetylated_alpha-linked_acidic_dipeptidase_2
ENSG00000108370	5.49730390528178	255.074685580953	5.50256667552533	3.02841778499769e-18	8.42108367090208e-17	RGS9	chr17	+	65137431	65227703	3664	protein_coding	regulator_of_G-protein_signaling_9
ENSG00000081923	2693.49549568938	151.521775047461	-4.15083932779637	3.06194950910622e-18	8.50572459090203e-17	ATP8B1	chr18	-	57646426	57803101	6652	protein_coding	ATPase_aminophospholipid_transporter_class_I_type_8B_member_1
ENSG00000275964	461.448019887097	16.3579510360724	-4.80822909787661	3.39738376849227e-18	9.42799707540927e-17	RP11-61K9.3	chr13	+	19863858	19865048	1191	lincRNA	NA
ENSG00000153404	11.9192148715908	359.717623853909	4.90013225938304	3.47638742659129e-18	9.63751316720636e-17	PLEKHG4B	chr5	+	140258	189970	12203	protein_coding	pleckstrin_homology_and_RhoGEF_domain_containing_G4B
ENSG00000137501	7752.06917046221	462.180499873575	-4.0677124316051	3.5179980414289e-18	9.7430477479694e-17	SYTL2	chr11	-	85694224	85811159	11258	protein_coding	synaptotagmin_like_2
ENSG00000196639	12.8366262054278	377.158113439947	4.8625653210289	3.52971721608449e-18	9.76566933194562e-17	HRH1	chr3	+	11137093	11263557	5546	protein_coding	histamine_receptor_H1
ENSG00000133216	72.4680752166658	1367.9959160336	4.23608253593501	3.64861247963035e-18	1.00591035477654e-16	EPHB2	chr1	+	22710839	22921500	12516	protein_coding	EPH_receptor_B2
ENSG00000171385	192.648212491442	1.09771269193672	-7.31036646899913	3.65238428165736e-18	1.00591035477654e-16	KCND3	chr1	-	111770662	111989155	7863	protein_coding	potassium_channel_voltage_gated_Shal_related_subfamily_D_member_3
ENSG00000158125	0.9101298099858	150.431744377559	7.17481142934744	3.65406510462079e-18	1.00591035477654e-16	XDH	chr2	-	31334321	31414715	6037	protein_coding	xanthine_dehydrogenase
ENSG00000269586	1.38777878078145e-17	150.431744377559	10.2394410058791	3.65406510462079e-18	1.00591035477654e-16	CT45A10	chrX	-	135881063	135889086	1012	protein_coding	cancer/testis_antigen_family_45_member_A10
ENSG00000163286	0.9101298099858	150.431744377559	7.17481142934744	3.65406510462079e-18	1.00591035477654e-16	ALPPL2	chr2	+	232406843	232410714	2493	protein_coding	alkaline_phosphatase_placental_like_2
ENSG00000131149	11855.6237668339	717.247657628738	-4.04673708333161	3.91095873590151e-18	1.07555276196028e-16	GSE1	chr16	+	85611409	85676204	10173	protein_coding	Gse1_coiled-coil_protein
ENSG00000135547	935.746643267075	45.7887888640111	-4.34957160837172	4.00896417300472e-18	1.10140383338464e-16	HEY2	chr6	+	125747664	125761269	2741	protein_coding	hes-related_family_bHLH_transcription_factor_with_YRPW_motif_2
ENSG00000174791	13.7540369826991	389.148450016151	4.8090909431255	4.68961757694293e-18	1.28711749484538e-16	RIN1	chr11	-	66330242	66336840	5469	protein_coding	Ras_and_Rab_interactor_1
ENSG00000180155	503.648671363961	19.628043016514	-4.67322856366153	4.69589841350816e-18	1.28755635363797e-16	LYNX1	chr8	-	142764334	142778224	6039	protein_coding	Ly6/neurotoxin_1
ENSG00000274253	1.38777878078145e-17	148.251683034498	10.2183969406334	4.78997390344262e-18	1.31073703799578e-16	RP11-566K19.6	chr15	+	22757857	22778741	1640	sense_overlapping	NA
ENSG00000115598	1.38777878078145e-17	148.251683034498	10.2183969406334	4.78997390344262e-18	1.31073703799578e-16	IL1RL2	chr2	+	102186973	102240002	2644	protein_coding	interleukin_1_receptor-like_2
ENSG00000124107	51.3677371113988	1011.55591545437	4.29604790829679	4.84170401481039e-18	1.32357556770677e-16	SLPI	chr20	-	45252239	45254564	596	protein_coding	secretory_leukocyte_peptidase_inhibitor
ENSG00000105204	877.950099423693	42.5186957319358	-4.36422009337693	4.99880691933396e-18	1.36516573077064e-16	DYRK1B	chr19	-	39825350	39834201	3192	protein_coding	dual_specificity_tyrosine-(Y)-phosphorylation_regulated_kinase_1B
ENSG00000081842	385.303365822166	11.9978317798155	-4.99163570977836	5.23921619466865e-18	1.42940163263475e-16	PCDHA6	chr5	+	140827958	141012344	6133	protein_coding	protocadherin_alpha_6
ENSG00000156218	8.2495612111708	300.855971271924	5.16633573074459	5.48251967466727e-18	1.48903065702625e-16	ADAMTSL3	chr15	+	83654086	84039842	9754	protein_coding	ADAMTS_like_3
ENSG00000237978	144.943123942517	1.38777878078145e-17	-10.1860051464782	5.49026248581732e-18	1.48903065702625e-16	KCNMB2-AS1	chr3	-	178526505	178860405	1691	antisense	KCNMB2_antisense_RNA_1
ENSG00000183145	144.943123942517	1.38777878078145e-17	-10.1860051464782	5.49026248581732e-18	1.48903065702625e-16	RIPPLY3	chr21	+	37006150	37019659	2319	protein_coding	ripply_transcriptional_repressor_3
ENSG00000196604	1.38777878078145e-17	147.161652361299	10.2077586664957	5.49026248581732e-18	1.48903065702625e-16	POTEF	chr2	-	130073535	130129222	4371	protein_coding	POTE_ankyrin_domain_family_member_F
ENSG00000182103	0.9101298099858	147.161652361299	7.14312908996403	5.49026248581732e-18	1.48903065702625e-16	FAM181B	chr11	-	82729941	82733864	3924	protein_coding	family_with_sequence_similarity_181_member_B
ENSG00000080854	144.943123942517	1.38777878078145e-17	-10.1860051464782	5.49026248581732e-18	1.48903065702625e-16	IGSF9B	chr11	-	133908564	133956985	5753	protein_coding	immunoglobulin_superfamily_member_9B
ENSG00000235961	1.82754864465077	170.052296287562	6.44045347254167	5.75093053058318e-18	1.55819054701052e-16	PNMA6A	chrX	+	153072482	153075018	2209	protein_coding	paraneoplastic_Ma_antigen_family_member_6A
ENSG00000273853	144.025718364465	1.38777878078145e-17	-10.1768530354418	6.29765402784922e-18	1.70464353759726e-16	RP11-438D14.3	chr12	-	33432311	33432853	543	sense_intronic	NA
ENSG00000145451	226.592216618552	3.27767348587998	-6.06153750825567	6.35248773484384e-18	1.71779513467002e-16	GLRA3	chr4	-	174636914	174829314	9599	protein_coding	glycine_receptor_alpha_3
ENSG00000164687	40.3588610654512	821.89059382397	4.34350074457946	6.39980101113556e-18	1.72888926922632e-16	FABP5	chr8	+	81280363	81284777	2077	protein_coding	fatty_acid_binding_protein_5_(psoriasis-associated)
ENSG00000124762	8132.79243393714	502.511631773235	-4.01620934347265	7.28456834878676e-18	1.96597560510289e-16	CDKN1A	chr6	+	36676460	36687339	3050	protein_coding	cyclin-dependent_kinase_inhibitor_1A_(p21_Cip1)
ENSG00000137802	186.226373784617	1.09771269193672	-7.26148900577005	7.77543077443851e-18	2.09434007568887e-16	MAPKBP1	chr15	+	41774434	41827855	10357	protein_coding	mitogen-activated_protein_kinase_binding_protein_1
ENSG00000110076	2.74500333963777	187.492786653909	6.02714983433301	7.77543077443851e-18	2.09434007568887e-16	NRXN2	chr11	-	64606174	64723188	10580	protein_coding	neurexin_2
ENSG00000105289	3194.39887383036	190.762878578702	-4.06486682492775	7.89269194881043e-18	2.12384463096121e-16	TJP3	chr19	+	3708109	3750813	4217	protein_coding	tight_junction_protein_3
ENSG00000007171	3.66244545564338	207.113338127086	5.77131142322655	7.99109711776684e-18	2.14822250083779e-16	NOS2	chr17	-	27756766	27800499	4176	protein_coding	nitric_oxide_synthase_2
ENSG00000144199	25.6803498996692	570.093528346289	4.46538701357454	9.40248218749277e-18	2.52517248670155e-16	FAHD2B	chr2	-	97083583	97094882	2662	protein_coding	fumarylacetoacetate_hydrolase_domain_containing_2B
ENSG00000165443	1.38777878078145e-17	142.801529656901	10.1644033201078	9.54831215111204e-18	2.56183543870958e-16	PHYHIPL	chr10	+	59176590	59247774	4093	protein_coding	phytanoyl-CoA_2-hydroxylase_interacting_protein-like
ENSG00000106665	138.521284865009	2331.58295026051	4.07183390440931	1.04041367411147e-17	2.78873454695316e-16	CLIP2	chr7	+	74289475	74405943	7315	protein_coding	CAP-Gly_domain_containing_linker_protein_2
ENSG00000233030	201.82226773267	2.18769296388965	-6.45336583140516	1.08157841388467e-17	2.89625004481425e-16	RP11-196G18.3	chr1	-	149785659	149793020	3543	antisense	NA
ENSG00000223784	1.38777878078145e-17	141.711498977792	10.1533578018876	1.09863109690506e-17	2.93619570417746e-16	RP11-554I8.2	chr10	+	6737382	6739026	917	lincRNA	NA
ENSG00000266302	1.38777878078145e-17	141.711498977792	10.1533578018876	1.09863109690506e-17	2.93619570417746e-16	RP11-219A15.1	chr17	+	16690261	16804453	8804	protein_coding	NA
ENSG00000137648	339.433092004529	10.9078032090939	-4.94485588571551	1.10892171470651e-17	2.96082097826638e-16	TMPRSS4	chr11	+	118077012	118121890	9948	protein_coding	transmembrane_protease_serine_4
ENSG00000170837	403.651475281054	14.1778906812214	-4.8200040293161	1.11522220839281e-17	2.97475518457911e-16	GPR27	chr3	+	71754050	71756496	2447	protein_coding	G_protein-coupled_receptor_27
ENSG00000064300	17.4236759818468	437.109796224518	4.63840816009998	1.18197189661403e-17	3.14974894658745e-16	NGFR	chr17	+	49495293	49515017	4150	protein_coding	nerve_growth_factor_receptor
ENSG00000254337	200.904862211224	2.18769296388965	-6.44679723982114	1.19737525567955e-17	3.18770734815521e-16	RP11-865I6.2	chr8	-	68848742	68852763	515	lincRNA	NA
ENSG00000142185	10.0843900675811	322.656583386933	4.98162062763033	1.22471204266603e-17	3.25733132353564e-16	TRPM2	chr21	+	44350163	44443081	6705	protein_coding	transient_receptor_potential_cation_channel_subfamily_M_member_2
ENSG00000180287	1.38777878078145e-17	140.621468297433	10.1422270644318	1.26509035401188e-17	3.35499033998851e-16	PLD5	chr1	-	242082986	242524696	9545	protein_coding	phospholipase_D_family_member_5
ENSG00000204179	1.38777878078145e-17	140.621468297433	10.1422270644318	1.26509035401188e-17	3.35499033998851e-16	PTPN20	chr10	+	46911396	47002488	4506	protein_coding	protein_tyrosine_phosphatase_non-receptor_type_20
ENSG00000090932	1.38777878078145e-17	140.621468297433	10.1422270644318	1.26509035401188e-17	3.35499033998851e-16	DLL3	chr19	+	39498895	39508481	2618	protein_coding	delta-like_3_(Drosophila)
ENSG00000171766	8.2495612111708	288.865634579474	5.10768460268134	1.29889850893039e-17	3.44133024027887e-16	GATM	chr15	-	45361124	45402327	6644	protein_coding	glycine_amidinotransferase_(L-arginine:glycine_amidinotransferase)
ENSG00000059728	1411.88007515856	79.5797471054497	-4.14708681627657	1.31194817319707e-17	3.47255887498485e-16	MXD1	chr2	+	69897688	69942945	6351	protein_coding	MAX_dimerization_protein_1
ENSG00000188763	6.41472570341761	255.074685580953	5.28474127620646	1.32139995267593e-17	3.49421347101353e-16	FZD9	chr7	+	73433783	73436120	2338	protein_coding	frizzled_class_receptor_9
ENSG00000154065	3.66244545564338	201.663184957434	5.73286070767453	1.32611894920113e-17	3.50332346032472e-16	ANKRD29	chr18	-	23598926	23662885	6391	protein_coding	ankyrin_repeat_domain_29
ENSG00000150938	507.31829322703	7950.690595245	3.96976452683317	1.43163970390208e-17	3.77845714942525e-16	CRIM1	chr2	+	36355926	36551135	7122	protein_coding	cysteine_rich_transmembrane_BMP_regulator_1_(chordin-like)
ENSG00000104967	138.521284865009	1.38777878078145e-17	-10.1206865484668	1.45793949334297e-17	3.83315430271749e-16	NOVA2	chr19	-	45933734	45973546	8684	protein_coding	neuro-oncological_ventral_antigen_2
ENSG00000198765	1.38777878078145e-17	139.531437615802	10.1310097825293	1.45793949334297e-17	3.83315430271749e-16	SYCP1	chr1	+	114854803	114995370	4338	protein_coding	synaptonemal_complex_protein_1
ENSG00000138964	1.38777878078145e-17	139.531437615802	10.1310097825293	1.45793949334297e-17	3.83315430271749e-16	PARVG	chr22	+	44172956	44219533	8656	protein_coding	parvin_gamma
ENSG00000160013	1.38777878078145e-17	139.531437615802	10.1310097825293	1.45793949334297e-17	3.83315430271749e-16	PTGIR	chr19	-	46620468	46625118	3546	protein_coding	prostaglandin_I2_(prostacyclin)_receptor_(IP)
ENSG00000234869	216.500756003284	3.27767348587998	-5.99585026213515	1.61800355219854e-17	4.24868945948097e-16	RP3-439F8.1	chr22	+	46541495	46548196	2949	antisense	NA
ENSG00000186897	8.2495612111708	285.59554275024	5.09126617378422	1.619078052993e-17	4.24868945948097e-16	C1QL4	chr12	-	49332411	49337188	2071	protein_coding	complement_component_1_q_subcomponent-like_4
ENSG00000130558	137.603879276325	1.38777878078145e-17	-10.1111091384044	1.68154984508269e-17	4.404219265678e-16	OLFM1	chr9	+	135075243	135121179	6302	protein_coding	olfactomedin_1
ENSG00000143032	1.38777878078145e-17	138.441406932874	10.1197045998151	1.68154984508269e-17	4.404219265678e-16	BARHL2	chr1	-	90711539	90717237	1979	protein_coding	BarH-like_homeobox_2
ENSG00000109814	19794.8505667874	1297.14392817859	-3.93159416262567	1.71994734601247e-17	4.50050161395708e-16	UGDH	chr4	-	39498755	39528311	4045	protein_coding	UDP-glucose_6-dehydrogenase
ENSG00000060558	13.7540369826991	366.257807451708	4.72165694900728	1.72922602402083e-17	4.52047955195786e-16	GNA15	chr19	+	3136193	3163769	2613	protein_coding	guanine_nucleotide_binding_protein_(G_protein)_alpha_15_(Gq_class)
ENSG00000271601	26.5977574016326	566.823436579564	4.40670347929472	1.91271939968599e-17	4.99541274556168e-16	LIX1L	chr1	-	145933423	145958001	3975	protein_coding	limb_and_CNS_expressed_1_like
ENSG00000166073	106.412088047543	1781.11750660011	4.06336203691064	1.97981008348068e-17	5.16572648062638e-16	GPR176	chr15	-	39799023	39920892	5128	protein_coding	G_protein-coupled_receptor_176
ENSG00000158164	3.66244545564338	198.393093049545	5.70928856451437	2.00364245766935e-17	5.22295461880235e-16	TMSB15A	chrX	-	102513676	102516784	685	protein_coding	thymosin_beta_15a
ENSG00000197321	3222.83844291711	201.663184957434	-3.99753423368325	2.06552892785258e-17	5.3791771822797e-16	SVIL	chr10	-	29457338	29736781	9937	protein_coding	supervillin
ENSG00000105246	6.41472570341761	248.534501875865	5.24728509841969	2.17615016220979e-17	5.66190213916096e-16	EBI3	chr19	+	4229498	4237531	1284	protein_coding	Epstein-Barr_virus_induced_3
ENSG00000138639	3.66244545564338	197.303062412522	5.70134481186962	2.22379349876059e-17	5.7803917778275e-16	ARHGAP24	chr4	+	85475114	86002670	7908	protein_coding	Rho_GTPase_activating_protein_24
ENSG00000146122	4.57987785670322	213.653521914944	5.50371306052784	2.37534636715175e-17	6.16849862540513e-16	DAAM2	chr6	+	39792298	39904877	12955	protein_coding	dishevelled_associated_activator_of_morphogenesis_2
ENSG00000173376	2.74500333963777	177.682510845033	5.94966611055244	2.38438881200585e-17	6.18613931311064e-16	NDNF	chr4	-	121035613	121073021	3556	protein_coding	neuron-derived_neurotrophic_factor
ENSG00000147251	20.1759022113556	468.720683429384	4.52900705123169	2.41391640669764e-17	6.25684402456095e-16	DOCK11	chrX	+	118495898	118686163	6721	protein_coding	dedicator_of_cytokinesis_11
ENSG00000269416	7.33214453489527	263.794930505762	5.14400622055088	2.47218548357081e-17	6.40184303047842e-16	LINC01224	chr19	-	23399233	23416075	3296	lincRNA	long_intergenic_non-protein_coding_RNA_1224
ENSG00000225383	1.38777878078145e-17	136.261345563027	10.0968249447747	2.59283661664612e-17	6.70795858837111e-16	SFTA1P	chr10	-	10784437	10794980	824	lincRNA	surfactant_associated_1_pseudogene
ENSG00000141404	14.6714472879947	372.797991045825	4.65488296030844	2.86008066218477e-17	7.3923945761977e-16	GNAL	chr18	+	11688956	11885685	8445	protein_coding	guanine_nucleotide_binding_protein_(G_protein)_alpha_activating_activity_polypeptide_olfactory_type
ENSG00000135773	226.592216618552	4.36767330927077	-5.65979291104468	3.15976897368996e-17	8.15167040764049e-16	CAPN9	chr1	+	230747384	230802003	2593	protein_coding	calpain_9
ENSG00000170629	5.49730390528178	227.823920069089	5.33964530261421	3.15976897368996e-17	8.15167040764049e-16	DPY19L2P2	chr7	-	103175133	103280410	5580	transcribed_unprocessed_pseudogene	DPY19L2_pseudogene_2
ENSG00000189366	275.214708070018	7.63772441976772	-5.15002228307192	3.17309446644709e-17	8.17837590644436e-16	ALG1L	chr3	-	125929275	125937039	843	protein_coding	ALG1_chitobiosyldiphosphodolichol_beta-mannosyltransferase-like
ENSG00000273983	173.382696262993	1.09771269193672	-7.15846692635828	3.37071410309327e-17	8.67958881546517e-16	HIST1H3G	chr6	-	26269405	26271815	2411	protein_coding	histone_cluster_1_H3g
ENSG00000165474	132.099445708908	1.38777878078145e-17	-10.0522698004056	3.47528041380895e-17	8.93212024861309e-16	GJB2	chr13	-	20187470	20192898	2427	protein_coding	gap_junction_protein_beta_2
ENSG00000205488	132.099445708908	1.38777878078145e-17	-10.0522698004056	3.47528041380895e-17	8.93212024861309e-16	CALML3-AS1	chr10	-	5514244	5526246	4757	antisense	CALML3_antisense_RNA_1
ENSG00000139687	1332.06580050808	78.4897162846543	-4.08301090858435	3.68084602499068e-17	9.45162899470296e-16	RB1	chr13	+	48303751	48481986	6169	protein_coding	retinoblastoma_1
ENSG00000237438	2.74500333963777	174.412418896327	5.92288499821783	3.78705953470719e-17	9.71529144253568e-16	CECR7	chr22	+	17036570	17060825	4354	lincRNA	cat_eye_syndrome_chromosome_region_candidate_7_(non-protein_coding)
ENSG00000140945	131.182040108157	1.38777878078145e-17	-10.042225637464	4.02866901473393e-17	1.03158683961078e-15	CDH13	chr16	+	82626803	83800640	11217	protein_coding	cadherin_13
ENSG00000196867	1.38777878078145e-17	132.991253497886	10.0618103931181	4.02866901473393e-17	1.03158683961078e-15	ZFP28	chr19	+	56538948	56556810	6974	protein_coding	ZFP28_zinc_finger_protein
ENSG00000140853	14.6714472879947	367.347838050978	4.63364237489191	4.03622499824249e-17	1.03256022024806e-15	NLRC5	chr16	+	56989485	57083531	12386	protein_coding	NLR_family_CARD_domain_containing_5
ENSG00000100311	395.394826028718	15.2679207244481	-4.68418050688196	4.13662592969982e-17	1.05726161424419e-15	PDGFB	chr22	-	39223359	39244751	3761	protein_coding	platelet-derived_growth_factor_beta_polypeptide
ENSG00000270504	3.66244545564338	190.762878578702	5.65274123916465	4.19531841806894e-17	1.07126696207348e-15	RP11-420L9.5	chr6	+	3751111	3753871	2761	antisense	NA
ENSG00000120820	13.7540369826991	350.99737905079	4.66027772576572	4.20668169335532e-17	1.0731721080609e-15	GLT8D2	chr12	-	103988984	104064183	3271	protein_coding	glycosyltransferase_8_domain_containing_2
ENSG00000254667	1.82754864465077	153.701836384102	6.29471492342634	4.25610601374392e-17	1.08477452719158e-15	AP000783.1	chr11	+	123430737	123435710	707	transcribed_unprocessed_pseudogene	NA
ENSG00000196917	765.109228010296	40.3386335971558	-4.24149981410454	4.38445405479788e-17	1.11645250889812e-15	HCAR1	chr12	-	122726076	122730843	4768	protein_coding	hydroxycarboxylic_acid_receptor_1
ENSG00000144642	1.38777878078145e-17	131.901222806631	10.0499474481169	4.67428904914645e-17	1.18915470065288e-15	RBMS3	chr3	+	29280982	30010391	10350	protein_coding	RNA_binding_motif_single_stranded_interacting_protein_3
ENSG00000178401	1898.10496644943	118.820854386684	-3.99637963525309	4.74119101493479e-17	1.20506001942441e-15	DNAJC22	chr12	+	49346917	49357546	5006	protein_coding	DnaJ_heat_shock_protein_family_(Hsp40)_member_C22
ENSG00000186479	1.82754864465077	152.611805716302	6.28445493119804	4.84978885401298e-17	1.23152394528357e-15	RGS7BP	chr5	+	64506257	64612312	4379	protein_coding	regulator_of_G-protein_signaling_7_binding_protein
ENSG00000122863	31.1847935465631	614.78478246681	4.29536928709515	5.14943146155398e-17	1.30640696147782e-15	CHST3	chr10	+	71964365	72013564	6970	protein_coding	carbohydrate_(chondroitin_6)_sulfotransferase_3
ENSG00000080493	1.38777878078145e-17	130.811192113891	10.0379861475709	5.42820663771841e-17	1.37586277183312e-15	SLC4A4	chr4	+	71187286	71572087	8361	protein_coding	solute_carrier_family_4_(sodium_bicarbonate_cotransporter)_member_4
ENSG00000151150	2112.77784289229	134.081284187685	-3.97679255320698	5.66547172407742e-17	1.43467898603916e-15	ANK3	chr10	-	60026298	60733490	25614	protein_coding	ankyrin_3_node_of_Ranvier_(ankyrin_G)
ENSG00000166446	1751.32009364254	109.01057789519	-4.00446321216729	5.79539507140953e-17	1.46622962151641e-15	CDYL2	chr16	-	80597906	80804329	8557	protein_coding	chromodomain_protein_Y-like_2
ENSG00000144451	2.74500333963777	170.052296287562	5.88638551803847	6.06747052796706e-17	1.53365355688991e-15	SPAG16	chr2	+	213284379	214410501	8257	protein_coding	sperm_associated_antigen_16
ENSG00000136010	71.5506693429158	1188.14086991717	4.05108998781033	6.12382070962726e-17	1.54647560454967e-15	ALDH1L2	chr12	-	105019784	105084577	8507	protein_coding	aldehyde_dehydrogenase_1_family_member_L2
ENSG00000066032	1.38777878078145e-17	129.721161419637	10.0259248469061	6.30940901397139e-17	1.58896572612845e-15	CTNNA2	chr2	+	79185231	80648861	7535	protein_coding	catenin_alpha_2
ENSG00000213626	1.38777878078145e-17	129.721161419637	10.0259248469061	6.30940901397139e-17	1.58896572612845e-15	LBH	chr2	+	30231531	30323730	4535	protein_coding	limb_bud_and_heart_development
ENSG00000273079	1.38777878078145e-17	129.721161419637	10.0259248469061	6.30940901397139e-17	1.58896572612845e-15	GRIN2B	chr12	-	13537337	13981957	30672	protein_coding	glutamate_receptor_ionotropic_N-methyl_D-aspartate_2B
ENSG00000198729	13.7540369826991	344.457195443644	4.633151311815	6.44003165537265e-17	1.620377955667e-15	PPP1R14C	chr6	+	150143076	150250357	2152	protein_coding	protein_phosphatase_1_regulatory_inhibitor_subunit_14C
ENSG00000139112	89.8987854075796	1443.20802620752	4.00284224043713	6.49041468041357e-17	1.63156210352883e-15	GABARAPL1	chr12	+	10212458	10223130	4086	protein_coding	GABA(A)_receptor-associated_protein_like_1
ENSG00000117114	209.161511884415	3154.55603907843	3.91389465580248	6.79156096656662e-17	1.70570518850729e-15	ADGRL2	chr1	+	81306160	81992436	7754	protein_coding	adhesion_G_protein-coupled_receptor_L2
ENSG00000103489	166.96085744056	1.09771269193672	-7.10405896758931	6.83583421616673e-17	1.71525799980658e-15	XYLT1	chr16	-	17101769	17470881	11004	protein_coding	xylosyltransferase_I
ENSG00000123689	1.82754864465077	150.431744377559	6.26371342008121	7.20530224649849e-17	1.80631738451189e-15	G0S2	chr1	+	209675420	209676388	866	protein_coding	G0/G1_switch_2
ENSG00000139946	5.49730390528178	219.103675059306	5.28336923353314	7.26821839059968e-17	1.81877410336562e-15	PELI2	chr14	+	56117814	56301526	6278	protein_coding	pellino_E3_ubiquitin_protein_ligase_family_member_2
ENSG00000119698	5.49730390528178	219.103675059306	5.28336923353314	7.26821839059968e-17	1.81877410336562e-15	PPP4R4	chr14	+	94146128	94279735	4974	protein_coding	protein_phosphatase_4_regulatory_subunit_4
ENSG00000151834	1.38777878078145e-17	128.631130723838	10.0137618599526	7.34035819926087e-17	1.8351562803443e-15	GABRA2	chr4	-	46248427	46475230	11930	protein_coding	gamma-aminobutyric_acid_(GABA)_A_receptor_alpha_2
ENSG00000172638	123.842795232227	1917.37132930621	3.95110512283956	7.52064521126649e-17	1.87852192511389e-15	EFEMP2	chr11	-	65866441	65873592	5397	protein_coding	EGF_containing_fibulin-like_extracellular_matrix_protein_2
ENSG00000122679	166.04345189077	1.09771269193672	-7.09611615516325	7.70589309839281e-17	1.92304687930037e-15	RAMP3	chr7	+	45157791	45186302	1427	protein_coding	receptor_(G_protein-coupled)_activity_modifying_protein_3
ENSG00000176842	630.250625333544	32.7084158598049	-4.26333964538051	7.79670191049881e-17	1.94394468939826e-15	IRX5	chr16	+	54930862	54934485	2845	protein_coding	iroquois_homeobox_5
ENSG00000168917	3.66244545564338	185.312725367632	5.61094874751684	8.04625420526976e-17	2.00434816031815e-15	SLC35G2	chr3	+	136818647	136855892	4287	protein_coding	solute_carrier_family_35_member_G2
ENSG00000151835	119.255767115572	1853.05952499077	3.95627968331143	8.17287666323e-17	2.03404779290034e-15	SACS	chr13	-	23328823	23433728	15909	protein_coding	sacsin_molecular_chaperone
ENSG00000100427	1.82754864465077	149.341713706578	6.2532297573792	8.23326345538263e-17	2.04722403513994e-15	MLC1	chr22	-	50059391	50085902	4297	protein_coding	megalencephalic_leukoencephalopathy_with_subcortical_cysts_1
ENSG00000259363	1.38777878078145e-17	127.541100026463	10.0014954575305	8.54765395571823e-17	2.12156165556144e-15	CTD-2054N24.2	chr15	+	99807023	99877148	1291	lincRNA	NA
ENSG00000154133	1.38777878078145e-17	127.541100026463	10.0014954575305	8.54765395571823e-17	2.12156165556144e-15	ROBO4	chr11	-	124883691	124898500	7033	protein_coding	roundabout_guidance_receptor_4
ENSG00000249364	165.126046340006	1.09771269193672	-7.08812937108194	8.69169388217338e-17	2.15536765963616e-15	RP11-434D9.1	chr5	+	67379378	67805238	3250	lincRNA	NA
ENSG00000134830	215.583350490116	4.36767330927077	-5.58798309136883	8.77965257467363e-17	2.17521824735225e-15	C5AR2	chr19	+	47332147	47347327	6802	protein_coding	complement_component_5a_receptor_2
ENSG00000153208	20.1759022113556	441.469918600492	4.44261595489299	8.97998349596327e-17	2.22176324380094e-15	MERTK	chr2	+	111898479	112029561	4700	protein_coding	MER_proto-oncogene_tyrosine_kinase
ENSG00000183072	3.66244545564338	184.222694723541	5.6024429809774	8.98367596489819e-17	2.22176324380094e-15	NKX2-5	chr5	-	173232109	173235357	2094	protein_coding	NK2_homeobox_5
ENSG00000203668	160.539018571025	2418.78539676696	3.91217566218047	9.32032880264218e-17	2.30295024619463e-15	CHML	chr1	-	241628853	241635930	7078	protein_coding	choroideremia-like_(Rab_escort_protein_2)
ENSG00000198673	9.16697626675744	277.965328474831	4.90235608872758	9.52040708920485e-17	2.35027572136645e-15	FAM19A2	chr12	-	61708259	62279150	9255	protein_coding	family_with_sequence_similarity_19_(chemokine_(C-C_motif)-like)_member_A2
ENSG00000072163	2.74500333963777	165.692173666079	5.84893859719886	9.8093053722566e-17	2.41942338154645e-15	LIMS2	chr2	-	127638381	127681786	8489	protein_coding	LIM_and_senescent_cell_antigen-like_domains_2
ENSG00000168421	125.677606463398	1.38777878078145e-17	-9.98044630547543	9.96282845169808e-17	2.45508732303001e-15	RHOH	chr4	+	40191053	40246967	6608	protein_coding	ras_homolog_family_member_H
ENSG00000150676	181.639346115776	2.18769296388965	-6.30146158497325	1.00351894175715e-16	2.47070496125903e-15	CCDC83	chr11	+	85855101	85920021	2359	protein_coding	coiled-coil_domain_containing_83
ENSG00000143653	188.061184847117	2786.12570264834	3.88803870484405	1.03069192738947e-16	2.53533619813397e-15	SCCPDH	chr1	+	246724047	246768137	2503	protein_coding	saccharopine_dehydrogenase_(putative)
ENSG00000003989	11552.8799669712	813.170349145173	-3.82835997024918	1.04534670944062e-16	2.56908667170031e-15	SLC7A2	chr8	+	17497088	17570573	7905	protein_coding	solute_carrier_family_7_(cationic_amino_acid_transporter_y+_system)_member_2
ENSG00000035862	289.893195906113	4199.89536630258	3.85614609393486	1.10910892646742e-16	2.72335755239112e-15	TIMP2	chr17	-	78852977	78925387	5633	protein_coding	TIMP_metallopeptidase_inhibitor_2
ENSG00000131711	188.061184847117	2776.31542741756	3.8829500560309	1.11437572282729e-16	2.73384895213856e-15	MAP1B	chr5	+	72107234	72209570	12630	protein_coding	microtubule_associated_protein_1B
ENSG00000038427	0.9101298099858	146.071621686961	7.13241178725723	1.23369427622483e-16	3.02387043586979e-15	VCAN	chr5	+	83471465	83582303	14831	protein_coding	versican
ENSG00000175592	111.916522001281	1702.63530471411	3.92567975115477	1.29605435054739e-16	3.17389053378484e-15	FOSL1	chr11	-	65892049	65900573	1887	protein_coding	FOS-like_antigen_1
ENSG00000183044	3620.99241011602	249.624532494098	-3.8579298140308	1.34902301214757e-16	3.30066564564683e-15	ABAT	chr16	+	8674565	8784575	9744	protein_coding	4-aminobutyrate_aminotransferase
ENSG00000224189	27.515164803161	527.582335356604	4.25453695192199	1.56447400332055e-16	3.82440885025054e-15	HAGLR	chr2	-	176173195	176188958	4851	antisense	HOXD_antisense_growth-associated_long_non-coding_RNA
ENSG00000172020	1.38777878078145e-17	124.271007924555	9.96405778906339	1.58663419370208e-16	3.87169715714295e-15	GAP43	chr3	+	115623324	115721490	2087	protein_coding	growth_associated_protein_43
ENSG00000154080	1.38777878078145e-17	124.271007924555	9.96405778906339	1.58663419370208e-16	3.87169715714295e-15	CHST9	chr18	-	26906481	27185317	11522	protein_coding	carbohydrate_(N-acetylgalactosamine_4-0)_sulfotransferase_9
ENSG00000246082	0.9101298099858	143.891560334784	7.11073533756451	1.62141966509073e-16	3.94957149775556e-15	NUDT16P1	chr3	+	131361898	131365122	2312	unitary_pseudogene	nudix_hydrolase_16_pseudogene_1
ENSG00000180447	0.9101298099858	143.891560334784	7.11073533756451	1.62141966509073e-16	3.94957149775556e-15	GAS1	chr9	-	86944363	86947189	2827	protein_coding	growth_arrest_specific_1
ENSG00000146648	291.728006881792	4149.75395957675	3.82972068382027	1.66074058253223e-16	4.04177227966538e-15	EGFR	chr7	+	55019021	55256620	12961	protein_coding	epidermal_growth_factor_receptor
ENSG00000173210	39.4414545240862	691.086923560121	4.12652410526236	1.77940369035413e-16	4.32673571073642e-15	ABLIM3	chr5	+	149141483	149260542	7225	protein_coding	actin_binding_LIM_protein_family_member_3
ENSG00000170801	1.38777878078145e-17	123.180977220546	9.95135951975782	1.85646994093032e-16	4.51013956232552e-15	HTRA3	chr4	+	8269765	8307111	3321	protein_coding	HtrA_serine_peptidase_3
ENSG00000118257	1.82754864465077	142.801529656901	6.18867573430989	1.86092625361778e-16	4.51299231928947e-15	NRP2	chr2	+	205681990	205798133	13896	protein_coding	neuropilin_2
ENSG00000182557	0.9101298099858	142.801529656901	7.09977374357612	1.86092625361778e-16	4.51299231928947e-15	SPNS3	chr17	+	4433688	4488208	2684	protein_coding	spinster_homolog_3_(Drosophila)
ENSG00000114405	4025.56821547201	283.415481529741	-3.82765358849557	1.91046443243374e-16	4.62904690364408e-15	C3orf14	chr3	+	62318973	62336213	4430	protein_coding	chromosome_3_open_reading_frame_14
ENSG00000171804	4.57987785670322	192.942939858921	5.35669898419575	1.97525127559111e-16	4.78181208891118e-15	WDR87	chr19	-	37884823	37906677	9199	protein_coding	WD_repeat_domain_87
ENSG00000273382	323.837198838023	11.9978317798155	-4.74100303795644	1.99224268605492e-16	4.81870414328904e-15	RP5-1065J22.8	chr1	-	109087971	109090858	2888	antisense	NA
ENSG00000176641	685.294952999608	38.1585714259786	-4.16250461007249	2.01429056939465e-16	4.86775087424625e-15	RNF152	chr18	-	61808063	61894247	10632	protein_coding	ring_finger_protein_152
ENSG00000047230	1895.35275008451	127.541100026463	-3.89220928023791	2.07630982428047e-16	5.01322181541152e-15	CTPS2	chrX	-	16588003	16712936	5510	protein_coding	CTP_synthase_2
ENSG00000086289	74.3028869379177	1161.98013592957	3.96461774613043	2.13301446321264e-16	5.1456167327027e-15	EPDR1	chr7	+	37683843	37951941	2864	protein_coding	ependymin_related_1
ENSG00000149654	1.38777878078145e-17	122.090946514791	9.93854848998586	2.1743586294458e-16	5.24075693850911e-15	CDH22	chr20	-	46173733	46308498	4929	protein_coding	cadherin_22_type_2
ENSG00000137460	531.170835321715	27.258260206801	-4.27858618574167	2.23213927162163e-16	5.37531191846466e-15	FHDC1	chr4	+	152936352	152979696	6593	protein_coding	FH2_domain_containing_1
ENSG00000135362	6.41472570341761	222.373766940926	5.08690543231076	2.34239465767298e-16	5.63096114341475e-15	PRR5L	chr11	+	36296288	36465204	6616	protein_coding	proline_rich_5_like
ENSG00000266934	220.170378051351	5.45768452873822	-5.30444622503702	2.34239465767298e-16	5.63096114341475e-15	RP11-332H18.3	chr17	+	61382785	61384680	1329	sense_intronic	NA
ENSG00000180739	18.3410849555724	393.50857240486	4.41336152567944	2.42684625577262e-16	5.82888199825353e-15	S1PR5	chr19	-	10512742	10517931	2806	protein_coding	sphingosine-1-phosphate_receptor_5
ENSG00000188338	0.9101298099858	140.621468297433	7.07759748790012	2.45693863489677e-16	5.89086917160385e-15	SLC38A3	chr3	+	50205246	50221486	3968	protein_coding	solute_carrier_family_38_member_3
ENSG00000185339	1.82754864465077	140.621468297433	6.16649947863389	2.45693863489677e-16	5.89086917160385e-15	TCN2	chr22	+	30606838	30627278	3122	protein_coding	transcobalamin_2
ENSG00000205002	11.9192148715908	294.31578762429	4.61073659560017	2.517815103506e-16	6.03157083288489e-15	AARD	chr8	+	116938199	116944487	2412	protein_coding	alanine_and_arginine_rich_domain_containing_protein
ENSG00000254471	1.38777878078145e-17	121.000915807254	9.92562267916842	2.54924804831577e-16	6.096249615368e-15	RP11-885L14.1	chr11	+	79987513	79989630	2118	processed_pseudogene	NA
ENSG00000198354	1.38777878078145e-17	121.000915807254	9.92562267916842	2.54924804831577e-16	6.096249615368e-15	DCAF12L2	chrX	-	126164531	126165951	1421	protein_coding	DDB1_and_CUL4_associated_factor_12-like_2
ENSG00000082556	0.9101298099858	139.531437615802	7.0663802059977	2.82639698603631e-16	6.74728676327991e-15	OPRK1	chr8	-	53225716	53251697	5738	protein_coding	opioid_receptor_kappa_1
ENSG00000182983	0.9101298099858	139.531437615802	7.0663802059977	2.82639698603631e-16	6.74728676327991e-15	ZNF662	chr3	+	42905731	42917641	5070	protein_coding	zinc_finger_protein_662
ENSG00000152977	388.055582243183	17.4479815520228	-4.46597432941069	2.85102291547868e-16	6.80017182988545e-15	ZIC1	chr3	+	147393422	147510293	6806	protein_coding	Zic_family_member_1
ENSG00000197724	2025.62432468292	139.531437615802	-3.8585887771817	2.90522811304349e-16	6.92345566176854e-15	PHF2	chr9	+	93576407	93679587	5569	protein_coding	PHD_finger_protein_2
ENSG00000276170	1.38777878078145e-17	119.910885097898	9.91258001192428	2.9918258344817e-16	7.1174915462008e-15	AC124789.1	chr17	-	38450394	38452444	1248	processed_transcript	NA
ENSG00000178026	118.338361485234	1.38777878078145e-17	-9.89373004001195	2.9918258344817e-16	7.1174915462008e-15	LRRC75B	chr22	-	24585620	24593208	3422	protein_coding	leucine_rich_repeat_containing_75B
ENSG00000168916	3.66244545564338	173.322388245284	5.51450779816135	3.12087954493821e-16	7.41809061066083e-15	ZNF608	chr5	-	124636913	124748807	6922	protein_coding	zinc_finger_protein_608
ENSG00000110195	17.4236759818468	373.8880216445	4.4130839845636	3.21970249721427e-16	7.64637637097492e-15	FOLR1	chr11	+	72189558	72196301	1577	protein_coding	folate_receptor_1_(adult)
ENSG00000112539	0.9101298099858	138.441406932874	7.05507502328342	3.2539778385164e-16	7.71445211526204e-15	C6orf118	chr6	-	165279664	165309607	2240	protein_coding	chromosome_6_open_reading_frame_118
ENSG00000221887	0.9101298099858	138.441406932874	7.05507502328342	3.2539778385164e-16	7.71445211526204e-15	HMSD	chr18	+	63949301	63981774	2920	protein_coding	histocompatibility_(minor)_serpin_domain_containing
ENSG00000187634	722.908576868775	42.5186957319358	-4.08394068089753	3.2881328815118e-16	7.78871166015987e-15	SAMD11	chr1	+	924880	944581	3214	protein_coding	sterile_alpha_motif_domain_containing_11
ENSG00000133135	1.38777878078145e-17	118.820854386684	9.89941835607017	3.51487230904144e-16	8.29721058978101e-15	RNF128	chrX	+	106693794	106796993	3432	protein_coding	ring_finger_protein_128_E3_ubiquitin_protein_ligase
ENSG00000183780	1.38777878078145e-17	118.820854386684	9.89941835607017	3.51487230904144e-16	8.29721058978101e-15	SLC35F3	chr1	+	233904933	234324516	3195	protein_coding	solute_carrier_family_35_member_F3
ENSG00000280435	1.38777878078145e-17	118.820854386684	9.89941835607017	3.51487230904144e-16	8.29721058978101e-15	RP4-555D20.1	chr3	-	44115818	44117487	1670	TEC	NA
ENSG00000165556	1.38777878078145e-17	118.820854386684	9.89941835607017	3.51487230904144e-16	8.29721058978101e-15	CDX2	chr13	-	27962137	27971139	4122	protein_coding	caudal_type_homeobox_2
ENSG00000144824	99.0728425904154	1447.56814853614	3.86720102617854	3.82183472925367e-16	9.01408892703303e-15	PHLDB2	chr3	+	111732497	111976517	12109	protein_coding	pleckstrin_homology-like_domain_family_B_member_2
ENSG00000232759	1.38777878078145e-17	117.730823673571	9.88613552052881	4.13368785640788e-16	9.71628630248487e-15	AC002480.3	chr7	+	22563337	22573996	2432	antisense	NA
ENSG00000102383	1.38777878078145e-17	117.730823673571	9.88613552052881	4.13368785640788e-16	9.71628630248487e-15	ZDHHC15	chrX	-	75368427	75523502	6820	protein_coding	zinc_finger_DHHC-type_containing_15
ENSG00000135333	1.38777878078145e-17	117.730823673571	9.88613552052881	4.13368785640788e-16	9.71628630248487e-15	EPHA7	chr6	-	93240020	93419547	7456	protein_coding	EPH_receptor_A7
ENSG00000183186	116.503550217158	1.38777878078145e-17	-9.87121135429648	4.13368785640788e-16	9.71628630248487e-15	C2CD4C	chr19	-	405438	409170	3129	protein_coding	C2_calcium-dependent_domain_containing_4C
ENSG00000115738	977.947294310079	62.1392533471915	-3.97365934906457	4.28394696437033e-16	1.00608732252048e-14	ID2	chr2	+	8678845	8684453	2205	protein_coding	inhibitor_of_DNA_binding_2_dominant_negative_helix-loop-helix_protein
ENSG00000249430	1.82754864465077	137.351376248624	6.13258254198747	4.32335349365558e-16	1.01365534496378e-14	CTD-2231H16.1	chr5	+	92151	139863	705	lincRNA	NA
ENSG00000198467	279.801735524892	3812.93451004383	3.76779151205265	4.32354357893353e-16	1.01365534496378e-14	TPM2	chr9	-	35681992	35691020	4047	protein_coding	tropomyosin_2_(beta)
ENSG00000101255	1632.97478992255	112.280670078068	-3.86093440207774	4.41589083332655e-16	1.03442430840982e-14	TRIB3	chr20	+	362835	397559	3434	protein_coding	tribbles_pseudokinase_3
ENSG00000163975	119.255767115572	1711.35554936841	3.84151752390213	4.56574777272947e-16	1.06861812338581e-14	MFI2	chr3	-	196988621	197029816	8393	protein_coding	antigen_p97_(melanoma_associated)_identified_by_monoclonal_antibodies_133.2_and_96.5
ENSG00000231128	115.586144579315	1.38777878078145e-17	-9.85981881665971	4.86661123520363e-16	1.13613476722695e-14	RP5-1073O3.2	chr1	+	113812379	113829171	1080	antisense	NA
ENSG00000231672	115.586144579315	1.38777878078145e-17	-9.85981881665971	4.86661123520363e-16	1.13613476722695e-14	DIRC3	chr2	-	217284019	217756593	4665	protein_coding	disrupted_in_renal_carcinoma_3
ENSG00000016082	1.38777878078145e-17	116.64079295852	9.87272925313975	4.86661123520363e-16	1.13613476722695e-14	ISL1	chr5	+	51383391	51394738	2882	protein_coding	ISL_LIM_homeobox_1
ENSG00000270872	0.9101298099858	136.261345563027	7.0321953682431	4.98945857041088e-16	1.16382612506251e-14	SRGAP2D	chr1	+	143975087	144068350	1021	unprocessed_pseudogene	SLIT-ROBO_Rho_GTPase_activating_protein_2D_(pseudogene)
ENSG00000027869	4.57987785670322	184.222694723541	5.29001692357808	5.18707214678944e-16	1.20889551787167e-14	SH2D2A	chr1	-	156806243	156816862	2512	protein_coding	SH2_domain_containing_2A
ENSG00000099139	8.2495612111708	241.994318160145	4.85237233952803	5.23049727241855e-16	1.21798395841475e-14	PCSK5	chr9	+	75890644	76362339	12705	protein_coding	proprotein_convertase_subtilisin/kexin_type_5
ENSG00000179082	150.447557381933	1.09771269193672	-6.95393434429171	5.68914869203218e-16	1.32358189943581e-14	C9orf106	chr9	+	129321016	129324905	3145	lincRNA	chromosome_9_open_reading_frame_106
ENSG00000128602	8.2495612111708	240.904287539771	4.84586239044762	5.69360164005877e-16	1.32358189943581e-14	SMO	chr7	+	129188872	129213545	4311	protein_coding	smoothened_frizzled_class_receptor
ENSG00000176293	1.38777878078145e-17	115.550762241487	9.85919723836757	5.7356489557757e-16	1.33223042172962e-14	ZNF135	chr19	+	58059239	58086310	6418	protein_coding	zinc_finger_protein_135
ENSG00000196376	0.9101298099858	135.171314876056	7.02061801835986	5.76294629133802e-16	1.33744123171381e-14	SLC35F1	chr6	+	117907526	118317676	4855	protein_coding	solute_carrier_family_35_member_F1
ENSG00000256229	307.323900144081	11.9978317798155	-4.66552574843702	6.07623955028017e-16	1.40896006637652e-14	ZNF486	chr19	+	20167228	20200490	4261	protein_coding	zinc_finger_protein_486
ENSG00000140057	740.339280604561	45.7887888640111	-4.01169370491721	6.32202166748101e-16	1.46471708405556e-14	AK7	chr14	+	96392111	96489427	5001	protein_coding	adenylate_kinase_7
ENSG00000237523	7.33214453489527	224.553828193347	4.91176247873614	6.73568702694132e-16	1.55924350949422e-14	LINC00857	chr10	+	80207710	80219657	2171	lincRNA	long_intergenic_non-protein_coding_RNA_857
ENSG00000230707	1.38777878078145e-17	114.460731522431	9.84553709490153	6.76724049458426e-16	1.56391496505514e-14	RP11-364B14.3	chrX	+	140091743	140092561	819	processed_pseudogene	NA
ENSG00000137959	1.38777878078145e-17	114.460731522431	9.84553709490153	6.76724049458426e-16	1.56391496505514e-14	IFI44L	chr1	+	78619922	78646145	10240	protein_coding	interferon_induced_protein_44_like
ENSG00000166816	372.459689179742	17.4479815520228	-4.40681577338638	6.85243624793561e-16	1.58227413311904e-14	LDHD	chr16	-	75111860	75116771	2359	protein_coding	lactate_dehydrogenase_D
ENSG00000136826	2253.14087747093	163.512112350302	-3.78352023005693	6.96118204824079e-16	1.60603580124723e-14	KLF4	chr9	-	107484852	107490482	3659	protein_coding	Kruppel-like_factor_4_(gut)
ENSG00000143851	22.0107186986201	413.129123138053	4.22212639948121	7.08244904772444e-16	1.63264401727971e-14	PTPN7	chr1	-	202147013	202161588	5906	protein_coding	protein_tyrosine_phosphatase_non-receptor_type_7
ENSG00000130775	3.66244545564338	165.692173666079	5.44960006224796	7.12779373268283e-16	1.64172073234933e-14	THEMIS2	chr1	+	27872543	27886685	4621	protein_coding	thymocyte_selection_associated_family_member_2
ENSG00000175920	2948.53421204062	218.013644431281	-3.75679782593212	7.5004928867033e-16	1.72611761403538e-14	DOK7	chr4	+	3463311	3501473	4031	protein_coding	docking_protein_7
ENSG00000149564	27.515164803161	488.341234086042	4.14305599611018	8.26811739939879e-16	1.90118308194704e-14	ESAM	chr11	-	124752583	124762290	2920	protein_coding	endothelial_cell_adhesion_molecule
ENSG00000196155	245.857732205502	3266.82918893249	3.73127581762696	8.284118153725e-16	1.9032709552681e-14	PLEKHG4	chr16	+	67277510	67289499	7328	protein_coding	pleckstrin_homology_and_RhoGEF_domain_containing_G4
ENSG00000121207	2.74500333963777	149.341713706578	5.69916180287601	8.43023929128047e-16	1.93361143243957e-14	LRAT	chr4	+	154626945	154753118	7562	protein_coding	lecithin_retinol_acyltransferase_(phosphatidylcholine--retinol_O-acyltransferase)
ENSG00000057593	146.777935094399	1.09771269193672	-6.91834026391521	8.43023929128047e-16	1.93361143243957e-14	F7	chr13	+	113105788	113120681	3795	protein_coding	coagulation_factor_VII_(serum_prothrombin_conversion_accelerator)
ENSG00000139971	5.49730390528178	194.032970498163	5.10815687020881	8.59461979855773e-16	1.96803196569639e-14	C14orf37	chr14	-	57999735	58298139	7565	protein_coding	chromosome_14_open_reading_frame_37
ENSG00000214076	5.49730390528178	194.032970498163	5.10815687020881	8.59461979855773e-16	1.96803196569639e-14	CPSF1P1	chr22	+	32269381	32273110	3730	processed_pseudogene	cleavage_and_polyadenylation_specific_factor_1_pseudogene_1
ENSG00000167711	7.33214453489527	222.373766940926	4.89769513368174	8.85130039039321e-16	2.02512156436109e-14	SERPINF2	chr17	+	1742836	1755268	2348	protein_coding	serpin_peptidase_inhibitor_clade_F_(alpha-2_antiplasmin_pigment_epithelium_derived_factor)_member_2
ENSG00000157214	0.9101298099858	131.901222806631	6.98531787158525	8.92505135571816e-16	2.03691151314195e-14	STEAP2	chr7	+	90167590	90238137	8715	protein_coding	STEAP2_metalloreductase
ENSG00000197410	0.9101298099858	131.901222806631	6.98531787158525	8.92505135571816e-16	2.03691151314195e-14	DCHS2	chr4	-	154232037	154491716	16281	protein_coding	dachsous_cadherin-related_2
ENSG00000126259	1.82754864465077	131.901222806631	6.07421986231902	8.92505135571816e-16	2.03691151314195e-14	KIRREL2	chr19	+	35855861	35867109	3382	protein_coding	kin_of_IRRE_like_2_(Drosophila)
ENSG00000185101	379.79893297768	18.5380122243038	-4.34809647297645	9.10687932252542e-16	2.07668564053708e-14	ANO9	chr11	-	417933	442011	6207	protein_coding	anoctamin_9
ENSG00000278828	547.684133680674	31.6183847293665	-4.10952431716324	9.15003150773933e-16	2.08479715405418e-14	HIST1H3H	chr6	+	27810064	27811300	1237	protein_coding	histone_cluster_1_H3h
ENSG00000171992	54.1199555757616	830.610838502115	3.93664206753992	9.18488626515179e-16	2.08927673430885e-14	SYNPO	chr5	+	150601080	150659220	10258	protein_coding	synaptopodin
ENSG00000151090	829.327610133763	53.4190058528579	-3.95358857779522	9.18488626515179e-16	2.08927673430885e-14	THRB	chr3	-	24117160	24495282	8709	protein_coding	thyroid_hormone_receptor_beta
ENSG00000212916	110.999116349814	1.38777878078145e-17	-9.80146628806262	9.45180114778336e-16	2.1464408205218e-14	MAP10	chr1	+	232804892	232808407	3516	protein_coding	microtubule_associated_protein_10
ENSG00000261069	1.38777878078145e-17	113.370700801306	9.83174637314049	9.45180114778336e-16	2.1464408205218e-14	RP11-701H24.4	chr15	+	25087661	25088896	1236	lincRNA	NA
ENSG00000134508	1094.45778734625	74.1295929543996	-3.88192049291132	9.54656447459911e-16	2.16617219155074e-14	CABLES1	chr18	+	23134564	23260467	6654	protein_coding	Cdk5_and_Abl_enzyme_substrate_1
ENSG00000108830	23.8455345590566	432.749673847547	4.17419493971504	9.57144674745343e-16	2.17002767519964e-14	RND2	chr17	+	43025241	43032036	4353	protein_coding	Rho_family_GTPase_2
ENSG00000173559	100.907653976477	1411.59713932406	3.80446185808163	9.63661829928042e-16	2.18300362313435e-14	NABP1	chr2	+	191678068	191696659	13806	protein_coding	nucleic_acid_binding_protein_1
ENSG00000280734	260.536220173228	9.81777552253388	-4.71357524216823	9.69196842360406e-16	2.19373517380687e-14	LINC01232	chr13	-	99486962	99499306	6199	processed_transcript	long_intergenic_non-protein_coding_RNA_1232
ENSG00000110811	66.9636398308348	978.854997947093	3.86698752560999	1.01583948482549e-15	2.29741790067318e-14	P3H3	chr12	+	6828410	6839851	4601	protein_coding	prolyl_3-hydroxylase_3
ENSG00000169174	1.82754864465077	130.811192113891	6.06225856177304	1.03437493152079e-15	2.33358039308886e-14	PCSK9	chr1	+	55039548	55064852	4981	protein_coding	proprotein_convertase_subtilisin/kexin_type_9
ENSG00000223485	1.82754864465077	130.811192113891	6.06225856177304	1.03437493152079e-15	2.33358039308886e-14	LINC01615	chr6	-	169158092	169162924	1054	lincRNA	long_intergenic_non-protein_coding_RNA_1615
ENSG00000153823	0.9101298099858	130.811192113891	6.97335657103927	1.03437493152079e-15	2.33358039308886e-14	PID1	chr2	-	228850526	229271285	3364	protein_coding	phosphotyrosine_interaction_domain_containing_1
ENSG00000179954	5.49730390528178	191.852909219103	5.09186557389541	1.05872016257808e-15	2.38654616320163e-14	SSC5D	chr19	+	55488404	55519098	7314	protein_coding	scavenger_receptor_cysteine_rich_family_5_domains
ENSG00000111846	26.5977574016326	468.720683429384	4.13259484424738	1.0807988926127e-15	2.43432025763652e-14	GCNT2	chr6	+	10492223	10629368	9052	protein_coding	glucosaminyl_(N-acetyl)_transferase_2_I-branching_enzyme_(I_blood_group)
ENSG00000140526	22901.1854344154	1819.26857695933	-3.65390733348106	1.10571614447039e-15	2.48840422987562e-14	ABHD2	chr15	+	89087459	89202360	10345	protein_coding	abhydrolase_domain_containing_2
ENSG00000247765	1.38777878078145e-17	112.280670078068	9.81782255255653	1.1189264594067e-15	2.51607494359311e-14	RP11-32B5.7	chr15	-	21298233	21325241	2165	lincRNA	NA
ENSG00000165215	921.985561402227	61.0492224362073	-3.91414212012215	1.12307318198834e-15	2.52333624002136e-14	CLDN3	chr7	-	73768997	73770270	1274	protein_coding	claudin_3
ENSG00000188171	0.9101298099858	129.721161419637	6.96129527037443	1.19984515550606e-15	2.69362788747529e-14	ZNF626	chr19	-	20620061	20661596	6713	protein_coding	zinc_finger_protein_626
ENSG00000255026	8.2495612111708	232.18404256489	4.79269744906128	1.2379042330969e-15	2.77680296202265e-14	RP11-326C3.2	chr11	+	287305	288987	860	antisense	NA
ENSG00000162616	58.7069859907873	868.761908961792	3.88432310152635	1.25559778813522e-15	2.81419680289378e-14	DNAJB4	chr1	+	77979175	78017964	3783	protein_coding	DnaJ_heat_shock_protein_family_(Hsp40)_member_B4
ENSG00000166813	41.2762675692771	655.115914199676	3.98403398723597	1.27165753884934e-15	2.84787084494264e-14	KIF7	chr15	-	89608789	89655451	5001	protein_coding	kinesin_family_member_7
ENSG00000172403	9.16697626675744	245.264410019381	4.72186998711887	1.29054817216991e-15	2.88782467720462e-14	SYNPO2	chr4	+	118850688	119061247	14034	protein_coding	synaptopodin_2
ENSG00000125850	188.061184847117	4.36767330927077	-5.39106812696257	1.3064484200532e-15	2.92102747966529e-14	OVOL2	chr20	-	17956979	18059188	2175	protein_coding	ovo-like_zinc_finger_2
ENSG00000184330	109.164305038094	1.38777878078145e-17	-9.77744798587844	1.32613506300054e-15	2.96023054931638e-14	S100A7A	chr1	+	153416524	153423225	4457	protein_coding	S100_calcium_binding_protein_A7A
ENSG00000087253	109.164305038094	1.38777878078145e-17	-9.77744798587844	1.32613506300054e-15	2.96023054931638e-14	LPCAT2	chr16	+	55508998	55586670	7439	protein_coding	lysophosphatidylcholine_acyltransferase_2
ENSG00000106829	66.0462338974126	953.784294521134	3.84942228768435	1.33424251116988e-15	2.97591267637331e-14	TLE4	chr9	+	79571773	79726882	8187	protein_coding	transducin_like_enhancer_of_split_4
ENSG00000235501	0.9101298099858	128.631130723838	6.94913228342099	1.39301853916311e-15	3.10448969574754e-14	RP4-639F20.1	chr1	+	94927566	94963270	1012	antisense	NA
ENSG00000213214	215.583350490116	6.54770241941083	-5.01643711259412	1.40481465375814e-15	3.12824354599212e-14	ARHGEF35	chr7	-	144186083	144195655	2431	protein_coding	Rho_guanine_nucleotide_exchange_factor_35
ENSG00000109674	143.108312784974	1.09771269193672	-6.8818457462898	1.43817550030067e-15	3.199940488169e-14	NEIL3	chr4	+	177309836	177362943	2959	protein_coding	nei-like_DNA_glycosylase_3
ENSG00000253361	157.786801896929	2.18769296388965	-6.098519126644	1.47935449438267e-15	3.28890282538544e-14	RP11-675F6.3	chr8	-	38543652	38552680	379	lincRNA	NA
ENSG00000189420	1.38777878078145e-17	110.100608625059	9.78956516144859	1.57354832102302e-15	3.49266766557337e-14	ZFP92	chrX	+	153418322	153426481	6105	protein_coding	ZFP92_zinc_finger_protein
ENSG00000238243	1.38777878078145e-17	110.100608625059	9.78956516144859	1.57354832102302e-15	3.49266766557337e-14	OR2W3	chr1	+	247895587	247896531	945	protein_coding	olfactory_receptor_family_2_subfamily_W_member_3
ENSG00000183722	12.8366262054278	282.325450919182	4.44490534059433	1.58241788933458e-15	3.50952212698308e-14	LHFP	chr13	-	39342892	39603528	2327	protein_coding	lipoma_HMGIC_fusion_partner
ENSG00000103257	43230.8902974845	3510.99603909439	-3.62206658561454	1.70894072379192e-15	3.78707323489135e-14	SLC7A5	chr16	-	87830023	87869488	4745	protein_coding	solute_carrier_family_7_(amino_acid_transporter_light_chain_L_system)_member_5
ENSG00000227124	1.38777878078145e-17	109.01057789519	9.7752261696622	1.86932808061381e-15	4.13916196014173e-14	ZNF717	chr3	-	75709643	75785583	6871	protein_coding	zinc_finger_protein_717
ENSG00000151322	141.273501621569	1.09771269193672	-6.86324635793121	1.88658940390388e-15	4.1740221397233e-14	NPAS3	chr14	+	32934933	33804176	9241	protein_coding	neuronal_PAS_domain_protein_3
ENSG00000115155	6.41472570341761	199.483123686033	4.93027259348452	1.94603186587046e-15	4.30146965263385e-14	OTOF	chr2	-	26457203	26558698	7885	protein_coding	otoferlin
ENSG00000187372	429.338828471287	22.8981358637006	-4.22190075129328	1.94732181285376e-15	4.30146965263385e-14	PCDHB13	chr5	+	141213919	141218979	5061	protein_coding	protocadherin_beta_13
ENSG00000137801	463.282830823029	5789.15995332856	3.64300873348679	2.04436027959737e-15	4.51219518853992e-14	THBS1	chr15	+	39581079	39599466	9158	protein_coding	thrombospondin_1
ENSG00000141968	27.515164803161	466.540622244322	4.07718524859971	2.07476245173184e-15	4.575624874505e-14	VAV1	chr19	+	6772714	6857366	4305	protein_coding	vav_guanine_nucleotide_exchange_factor_1
ENSG00000164035	140.356096037603	1.09771269193672	-6.85385596446657	2.16317622932941e-15	4.76678761881315e-14	EMCN	chr4	-	100395341	100880126	5243	protein_coding	endomucin
ENSG00000261226	168.795668537274	3.27767348587998	-5.63700353774957	2.24135214869721e-15	4.93510211699935e-14	RP11-830F9.7	chr16	-	88936779	88939651	2873	sense_intronic	NA
ENSG00000107147	10.0843900675811	250.714563112039	4.61781703574001	2.32677756881968e-15	5.11909679360881e-14	KCNT1	chr9	+	135702185	135795508	11656	protein_coding	potassium_channel_sodium_activated_subfamily_T_member_1
ENSG00000072201	299.984656262628	13.0878609931684	-4.50637510245656	2.36025507758356e-15	5.1885991118006e-14	LNX1	chr4	-	53459301	53701405	5725	protein_coding	ligand_of_numb-protein_X_1_E3_ubiquitin_protein_ligase
ENSG00000019549	3.66244545564338	155.88189771665	5.36161208182644	2.43626198248498e-15	5.35140900801274e-14	SNAI2	chr8	-	48917690	48921740	2282	protein_coding	snail_family_zinc_finger_2
ENSG00000183971	30.2673864777484	500.331570591066	4.04112999466349	2.46995061039509e-15	5.42107835087593e-14	NPW	chr16	+	2009926	2020755	1193	protein_coding	neuropeptide_W
ENSG00000183034	0.9101298099858	125.361038626855	6.91201568906044	2.55400562031337e-15	5.58772542277153e-14	OTOP2	chr17	+	74924275	74933912	2778	protein_coding	otopetrin_2
ENSG00000157782	0.9101298099858	125.361038626855	6.91201568906044	2.55400562031337e-15	5.58772542277153e-14	CABP1	chr12	+	120640552	120667324	5858	protein_coding	calcium_binding_protein_1
ENSG00000124143	1.82754864465077	125.361038626855	6.00091767979421	2.55400562031337e-15	5.58772542277153e-14	ARHGAP40	chr20	+	38601934	38651035	3195	protein_coding	Rho_GTPase_activating_protein_40
ENSG00000188933	1.82754864465077	125.361038626855	6.00091767979421	2.55400562031337e-15	5.58772542277153e-14	USP32P1	chr17	+	16786489	16804455	7676	transcribed_unprocessed_pseudogene	ubiquitin_specific_peptidase_32_pseudogene_1
ENSG00000187955	28.4325721119042	473.080805798896	4.05016810928663	2.74611245253428e-15	6.00324630819914e-14	COL14A1	chr8	+	120059780	120372036	8647	protein_coding	collagen_type_XIV_alpha_1
ENSG00000197580	2.74500333963777	139.531437615802	5.60121424222827	2.85037523902345e-15	6.22622473775885e-14	BCO2	chr11	+	112175467	112224699	6789	protein_coding	beta-carotene_oxygenase_2
ENSG00000006062	28.4325721119042	471.990775206593	4.04684096845274	2.86967987742731e-15	6.26341796104194e-14	MAP3K14	chr17	-	45263121	45317040	5852	protein_coding	mitogen-activated_protein_kinase_kinase_kinase_14
ENSG00000225465	0.9101298099858	124.271007924555	6.89942821253174	2.97883691395629e-15	6.4965102276536e-14	RFPL1S	chr22	-	29436534	29478175	6271	antisense	RFPL1_antisense_RNA_1
ENSG00000167889	23.8455345590566	408.769000755059	4.09197087837357	3.13424021148943e-15	6.83001109795332e-14	MGAT5B	chr17	+	76868456	76950393	6386	protein_coding	mannosyl_(alpha-16-)-glycoprotein_beta-16-N-acetyl-glucosaminyltransferase_isozyme_B
ENSG00000112232	1.38777878078145e-17	105.740485691512	9.73133374110249	3.1568423901275e-15	6.84671313650602e-14	KHDRBS2	chr6	-	61679960	62286227	2332	protein_coding	KH_domain_containing_RNA_binding_signal_transduction_associated_2
ENSG00000248124	1.38777878078145e-17	105.740485691512	9.73133374110249	3.1568423901275e-15	6.84671313650602e-14	RRN3P1	chr16	-	21796106	21820410	5253	transcribed_unprocessed_pseudogene	RRN3_homolog_RNA_polymerase_I_transcription_factor_pseudogene_1
ENSG00000133019	1.38777878078145e-17	105.740485691512	9.73133374110249	3.1568423901275e-15	6.84671313650602e-14	CHRM3	chr1	+	239386565	239915452	12170	protein_coding	cholinergic_receptor_muscarinic_3
ENSG00000255774	104.577276704366	1.38777878078145e-17	-9.71559233481787	3.1568423901275e-15	6.84671313650602e-14	AP000439.3	chr11	-	69477133	69479940	726	lincRNA	NA
ENSG00000223808	104.577276704366	1.38777878078145e-17	-9.71559233481787	3.1568423901275e-15	6.84671313650602e-14	RP11-428L9.2	chr10	+	8970125	8973468	677	lincRNA	NA
ENSG00000131477	1.38777878078145e-17	105.740485691512	9.73133374110249	3.1568423901275e-15	6.84671313650602e-14	RAMP2	chr17	+	42758447	42763041	1148	protein_coding	receptor_(G_protein-coupled)_activity_modifying_protein_2
ENSG00000168671	27.515164803161	456.730346908941	4.0465329658255	3.25436280341712e-15	7.05265811322097e-14	UGT3A2	chr5	-	36035017	36071358	2694	protein_coding	UDP_glycosyltransferase_3_family_polypeptide_A2
ENSG00000138944	20.1759022113556	370.617929848184	4.19030657530437	3.34927515815627e-15	7.25263119090201e-14	KIAA1644	chr22	-	44243667	44312851	6751	protein_coding	KIAA1644
ENSG00000171462	17.4236759818468	333.556889421918	4.24846514647857	3.36848157736521e-15	7.28848244367589e-14	DLK2	chr6	-	43450352	43456632	2236	protein_coding	delta-like_2_homolog_(Drosophila)
ENSG00000103150	825.657988299518	57.7791296604884	-3.83423446683923	3.47728224735219e-15	7.51798263242393e-14	MLYCD	chr16	+	83899126	83927026	16161	protein_coding	malonyl-CoA_decarboxylase
ENSG00000142675	319.250171428186	15.2679207244481	-4.37568828144369	3.50874282656019e-15	7.58004214243769e-14	CNKSR1	chr1	+	26177403	26189886	4043	protein_coding	connector_enhancer_of_kinase_suppressor_of_Ras_1
ENSG00000075213	72.4680752166658	994.115426117811	3.77555029168359	3.5694512996871e-15	7.70513973255061e-14	SEMA3A	chr7	-	83955777	84492724	9371	protein_coding	sema_domain_immunoglobulin_domain_(Ig)_short_basic_domain_secreted_(semaphorin)_3A
ENSG00000184304	28.4325721119042	466.540622244322	4.0300891860021	3.58022825581737e-15	7.72234174613596e-14	PRKD1	chr14	-	29576479	30191898	5187	protein_coding	protein_kinase_D1
ENSG00000259424	218.335567028227	7.63772441976772	-4.81619133005642	3.6242273916137e-15	7.81111892607902e-14	RP11-35O15.1	chr15	-	98646951	98647371	334	antisense	NA
ENSG00000124882	136.68647368601	1.09771269193672	-6.81567097458219	3.76742364631624e-15	8.1096393807658e-14	EREG	chr4	+	74365143	74388751	5717	protein_coding	epiregulin
ENSG00000167754	1.38777878078145e-17	104.650454952081	9.7164010794342	3.76863355100494e-15	8.1096393807658e-14	KLK5	chr19	-	50943303	50953093	1653	protein_coding	kallikrein_related_peptidase_5
ENSG00000007255	1202.71163120711	89.3900243048503	-3.74830340953119	3.78927238288738e-15	8.14767629411931e-14	TRAPPC6A	chr19	-	45162928	45178237	933	protein_coding	trafficking_protein_particle_complex_6A
ENSG00000178826	5.49730390528178	179.862572140597	4.99881856295382	3.8410476062507e-15	8.25255079839848e-14	TMEM139	chr7	+	143279957	143288048	2564	protein_coding	transmembrane_protein_139
ENSG00000180011	1093.54038188957	80.669777921781	-3.75891651988793	4.02346208449604e-15	8.63772293409255e-14	ZADH2	chr18	-	75195108	75209348	8157	protein_coding	zinc_binding_alcohol_dehydrogenase_domain_containing_2
ENSG00000237975	0.9101298099858	122.090946514791	6.87391891345421	4.06388899398173e-15	8.71770758373568e-14	FLG-AS1	chr1	+	152168125	152445456	7691	antisense	FLG_antisense_RNA_1
ENSG00000173805	11.0018028728265	244.174379399947	4.45563654037095	4.1290137502915e-15	8.85050718213301e-14	HAP1	chr17	-	41717742	41734644	6223	protein_coding	huntingtin-associated_protein_1
ENSG00000120129	194.483023544591	2426.41561083614	3.64020518950724	4.20386881412545e-15	9.00394051847851e-14	DUSP1	chr5	-	172768090	172771195	2019	protein_coding	dual_specificity_phosphatase_1
ENSG00000168461	11173.9915144151	941.793958098801	-3.56842710698074	4.22788390899586e-15	9.04832960165721e-14	RAB31	chr18	+	9708165	9862551	5586	protein_coding	RAB31_member_RAS_oncogene_family
ENSG00000188883	102.742465347562	1.38777878078145e-17	-9.69008788330483	4.50469479143558e-15	9.62576623615151e-14	KLRG2	chr7	-	139452690	139483712	2197	protein_coding	killer_cell_lectin-like_receptor_subfamily_G_member_2
ENSG00000237943	1.38777878078145e-17	103.560424210119	9.7013122388244	4.50469479143558e-15	9.62576623615151e-14	PRKCQ-AS1	chr10	+	6580419	6616452	3892	processed_transcript	PRKCQ_antisense_RNA_1
ENSG00000110427	9.16697626675744	230.003981317715	4.62923656594221	4.64294347567238e-15	9.91347736991197e-14	KIAA1549L	chr11	+	33542072	33674102	12318	protein_coding	KIAA1549-like
ENSG00000166402	100.907653976477	1310.22429516802	3.69695650319913	4.71706529310271e-15	1.00639265031511e-13	TUB	chr11	+	8019244	8106112	6722	protein_coding	tubby_bipartite_transcription_factor
ENSG00000064989	0.9101298099858	121.000915807254	6.86099310263677	4.75359783127117e-15	1.01183199657731e-13	CALCRL	chr2	-	187343129	187448460	6144	protein_coding	calcitonin_receptor_like_receptor
ENSG00000277561	1.82754864465077	121.000915807254	5.94989509337054	4.75359783127117e-15	1.01183199657731e-13	GOLGA8IP	chr15	-	22607540	22617854	2598	transcribed_unprocessed_pseudogene	golgin_A8_family_member_I_pseudogene
ENSG00000175344	0.9101298099858	121.000915807254	6.86099310263677	4.75359783127117e-15	1.01183199657731e-13	CHRNA7	chr15	+	32030488	32172521	5766	protein_coding	cholinergic_receptor_nicotinic_alpha_7
ENSG00000146267	227.509622126474	8.72774907734345	-4.68579065754304	5.06854579350783e-15	1.07803617840107e-13	FAXC	chr6	-	99271169	99350062	11662	protein_coding	failed_axon_connections_homolog
ENSG00000100344	20.1759022113556	362.98771565328	4.16030419359652	5.24545460396624e-15	1.11480098194494e-13	PNPLA3	chr22	+	43923739	43964488	3232	protein_coding	patatin_like_phospholipase_domain_containing_3
ENSG00000042062	455.943587078009	27.258260206801	-4.0583244823779	5.3578824046594e-15	1.13781562942501e-13	FAM65C	chr20	-	50586108	50691528	6009	protein_coding	family_with_sequence_similarity_65_member_C
ENSG00000188042	55.0373616926846	764.118972813748	3.79209198533993	5.38846042474299e-15	1.14342631281525e-13	ARL4C	chr2	-	234493041	234497053	4013	protein_coding	ADP_ribosylation_factor_like_GTPase_4C
ENSG00000142621	6.41472570341761	189.672847937708	4.85756280947184	5.4211985009571e-15	1.14948635292846e-13	FHAD1	chr1	+	15247272	15400283	12805	protein_coding	forkhead-associated_(FHA)_phosphopeptide_binding_domain_1
ENSG00000196218	31.1847935465631	492.701356452123	3.97606929664523	5.48218471578505e-15	1.16152204829588e-13	RYR1	chr19	+	38433699	38587564	15965	protein_coding	ryanodine_receptor_1_(skeletal)
ENSG00000058335	1.82754864465077	119.910885097898	5.9368524261264	5.56585823882278e-15	1.17834232044546e-13	RASGRF1	chr15	-	78959947	79090773	9929	protein_coding	Ras_protein_specific_guanine_nucleotide_releasing_factor_1
ENSG00000105409	63.2940160283793	867.671878377385	3.77420890300152	5.57531154160276e-15	1.17943571312014e-13	ATP1A3	chr19	-	41966582	41997497	5122	protein_coding	ATPase_Na+/K+_transporting_alpha_3_polypeptide
ENSG00000261716	1110.97108556574	82.8498395415086	-3.74331295100876	5.58808320078717e-15	1.18122887090583e-13	RP11-196G18.22	chr1	-	149844498	149849024	4527	sense_overlapping	NA
ENSG00000155066	3007.24816112606	246.35444063851	-3.60901455130488	5.62563429293103e-15	1.18825321574421e-13	PROM2	chr2	+	95274453	95291308	6063	protein_coding	prominin_2
ENSG00000124151	27968.9331629265	2401.34490746589	-3.54184717687404	5.69798656906242e-15	1.20261188515568e-13	NCOA3	chr20	+	47501902	47656877	8402	protein_coding	nuclear_receptor_coactivator_3
ENSG00000262943	212.83113394776	7.63772441976772	-4.77937583087165	5.74937149097321e-15	1.21252657494827e-13	ALOX12P2	chr17	+	6853861	6954107	5655	transcribed_unprocessed_pseudogene	arachidonate_12-lipoxygenase_pseudogene_2
ENSG00000236699	161.456424126895	3.27767348587998	-5.57292154442587	5.76575318396955e-15	1.2150496422402e-13	ARHGEF38	chr4	+	105552620	105708093	7579	protein_coding	Rho_guanine_nucleotide_exchange_factor_38
ENSG00000204525	330.259037205583	3967.71885254879	3.58610823149488	5.80254128696848e-15	1.22186591066554e-13	HLA-C	chr6	-	31268749	31272130	2507	protein_coding	major_histocompatibility_complex_class_I_C
ENSG00000112541	11.9192148715908	251.804593729691	4.38577306049375	5.93903615473967e-15	1.24965136412774e-13	PDE10A	chr6	-	165327287	165986603	12348	protein_coding	phosphodiesterase_10A
ENSG00000164733	1084.36632732255	12630.1918788876	3.54179091115627	6.00121965769097e-15	1.2617701972948e-13	CTSB	chr8	-	11842524	11869448	7428	protein_coding	cathepsin_B
ENSG00000175895	3579.70916467033	297.585879448923	-3.58795024714568	6.32267384032884e-15	1.32834112515572e-13	PLEKHF2	chr8	+	95133804	95156684	3137	protein_coding	pleckstrin_homology_and_FYVE_domain_containing_2
ENSG00000248498	99.9902482853638	1.38777878078145e-17	-9.65096535390183	6.46117703118544e-15	1.35227419737162e-13	ASNSP1	chr8	-	46579213	46614523	1807	unprocessed_pseudogene	asparagine_synthetase_pseudogene_1
ENSG00000104313	1.38777878078145e-17	101.380362718367	9.67065270907878	6.46117703118544e-15	1.35227419737162e-13	EYA1	chr8	-	71197433	71362232	5170	protein_coding	EYA_transcriptional_coactivator_and_phosphatase_1
ENSG00000259723	99.9902482853638	1.38777878078145e-17	-9.65096535390183	6.46117703118544e-15	1.35227419737162e-13	RP5-823G15.5	chr20	-	53453058	53504314	542	antisense	NA
ENSG00000144339	1.38777878078145e-17	101.380362718367	9.67065270907878	6.46117703118544e-15	1.35227419737162e-13	TMEFF2	chr2	-	191949043	192195709	6632	protein_coding	transmembrane_protein_with_EGF-like_and_two_follistatin-like_domains_2
ENSG00000204767	1.38777878078145e-17	101.380362718367	9.67065270907878	6.46117703118544e-15	1.35227419737162e-13	FAM196B	chr5	-	169864264	169980740	2999	protein_coding	family_with_sequence_similarity_196_member_B
ENSG00000214575	4.57987785670322	162.422081691105	5.1084368289133	6.50503627674432e-15	1.36041827107791e-13	CPEB1	chr15	-	82543201	82648861	8215	protein_coding	cytoplasmic_polyadenylation_element_binding_protein_1
ENSG00000183196	7.33214453489527	200.573154321994	4.74891952053307	6.53811842080772e-15	1.36629783199569e-13	CHST6	chr16	-	75472052	75495384	8469	protein_coding	carbohydrate_(N-acetylglucosamine_6-O)_sulfotransferase_6
ENSG00000126709	99.0728425904154	1265.53304128587	3.67333170342585	6.61249935258988e-15	1.38079229077885e-13	IFI6	chr1	-	27666061	27672218	865	protein_coding	interferon_alpha-inducible_protein_6
ENSG00000111490	1063.26600181672	80.669777921781	-3.71841752795169	7.20819888842557e-15	1.50404156017141e-13	TBC1D30	chr12	+	64781193	64881032	8648	protein_coding	TBC1_domain_family_member_30
ENSG00000121281	48.6155184584408	683.456709454992	3.80971080438898	7.4314284177474e-15	1.54944437389288e-13	ADCY7	chr16	+	50246137	50318135	8630	protein_coding	adenylate_cyclase_7
ENSG00000244586	1.82754864465077	117.730823673571	5.91040793473093	7.65351068982823e-15	1.59212706112683e-13	WNT5A-AS1	chr3	+	55487699	55488308	500	antisense	WNT5A_antisense_RNA_1
ENSG00000100055	0.9101298099858	117.730823673571	6.82150594399716	7.65351068982823e-15	1.59212706112683e-13	CYTH4	chr22	+	37282027	37315345	6161	protein_coding	cytohesin_4
ENSG00000139209	0.9101298099858	117.730823673571	6.82150594399716	7.65351068982823e-15	1.59212706112683e-13	SLC38A4	chr12	-	46764761	46832408	4145	protein_coding	solute_carrier_family_38_member_4
ENSG00000138271	131.182040108157	1.09771269193672	-6.75642888900488	7.67233197188791e-15	1.59483599061897e-13	GPR87	chr3	-	151294086	151316952	1698	protein_coding	G_protein-coupled_receptor_87
ENSG00000056972	1663.24916994582	132.991253497886	-3.64344624289591	8.17726558846445e-15	1.69851194069759e-13	TRAF3IP2	chr6	-	111556454	111606278	6553	protein_coding	TRAF3_interacting_protein_2
ENSG00000184232	101.825059663847	1287.33365293628	3.65849087719749	8.25397774405977e-15	1.71315201463689e-13	OAF	chr11	+	120210767	120230332	3176	protein_coding	out_at_first_homolog
ENSG00000167106	7734.63846683318	666.016220068592	-3.53747573781159	8.51933472857519e-15	1.76689460309613e-13	FAM102A	chr9	-	127940579	127980513	6100	protein_coding	family_with_sequence_similarity_102_member_A
ENSG00000108395	23243.3776687993	2034.00460153194	-3.51435006002018	8.62703260882123e-15	1.78788262076257e-13	TRIM37	chr17	-	58982638	59106921	5482	protein_coding	tripartite_motif_containing_37
ENSG00000135917	1.38777878078145e-17	100.290331968453	9.6550750950115	9.3166004288384e-15	1.92354225520634e-13	SLC19A3	chr2	-	227685210	227718012	5329	protein_coding	solute_carrier_family_19_(thiamine_transporter)_member_3
ENSG00000260409	1.38777878078145e-17	100.290331968453	9.6550750950115	9.3166004288384e-15	1.92354225520634e-13	RP11-403B2.7	chr15	-	20729747	20756183	1602	lincRNA	NA
ENSG00000164647	1.38777878078145e-17	100.290331968453	9.6550750950115	9.3166004288384e-15	1.92354225520634e-13	STEAP1	chr7	+	90154375	90164829	1625	protein_coding	six_transmembrane_epithelial_antigen_of_the_prostate_1
ENSG00000055118	98.1554368915377	1.38777878078145e-17	-9.6242815572708	9.3166004288384e-15	1.92354225520634e-13	KCNH2	chr7	-	150944961	150978315	5877	protein_coding	potassium_channel_voltage_gated_eag_related_subfamily_H_member_2
ENSG00000081189	1.38777878078145e-17	100.290331968453	9.6550750950115	9.3166004288384e-15	1.92354225520634e-13	MEF2C	chr5	-	88717117	88904257	10736	protein_coding	myocyte_enhancer_factor_2C
ENSG00000117461	2129.2911410787	175.502449546625	-3.5999376645584	9.3860065313813e-15	1.93641834673306e-13	PIK3R3	chr1	-	46040140	46133036	7410	protein_coding	phosphoinositide-3-kinase_regulatory_subunit_3
ENSG00000196189	613.737327019411	42.5186957319358	-3.84779546232772	1.00893534758405e-14	2.07996484212210e-13	SEMA4A	chr1	+	156147366	156177752	6822	protein_coding	sema_domain_immunoglobulin_domain_(Ig)_transmembrane_domain_(TM)_and_short_cytoplasmic_domain_(semaphorin)_4A
ENSG00000119900	352.276768701437	4112.69291982276	3.54480486901476	1.01425370257634e-14	2.08936262730726e-13	OGFRL1	chr6	+	71288803	71308950	9051	protein_coding	opioid_growth_factor_receptor-like_1
ENSG00000109743	2.74500333963777	130.811192113891	5.50819060726984	1.02559116682034e-14	2.11113642804837e-13	BST1	chr4	+	15702950	15738313	2980	protein_coding	bone_marrow_stromal_cell_antigen_1
ENSG00000184226	36.689234652651	535.212549486708	3.86183617749429	1.04813745572635e-14	2.15593329618029e-13	PCDH9	chr13	-	66302834	67230445	30944	protein_coding	protocadherin_9
ENSG00000119699	680.707925696637	47.9688509055297	-3.82362919150272	1.05329669612992e-14	2.16492619135044e-13	TGFB3	chr14	-	75958099	75982991	4914	protein_coding	transforming_growth_factor_beta_3
ENSG00000168490	1.38777878078145e-17	99.2003012157612	9.63932744275054	1.12102184021795e-14	2.30068818118164e-13	PHYHIP	chr8	-	22219704	22232341	4170	protein_coding	phytanoyl-CoA_2-hydroxylase_interacting_protein
ENSG00000226891	97.2380311886331	1.38777878078145e-17	-9.61075227064902	1.12102184021795e-14	2.30068818118164e-13	LINC01359	chr1	-	64972225	65002489	6617	processed_transcript	long_intergenic_non-protein_coding_RNA_1359
ENSG00000112218	12.8366262054278	256.164716197485	4.30467896402534	1.12924163682433e-14	2.31582954916525e-13	GPR63	chr6	-	96794126	96837463	5952	protein_coding	G_protein-coupled_receptor_63
ENSG00000222009	9.16697626675744	220.193705686918	4.56638364582748	1.13181938468988e-14	2.31938635606232e-13	BTBD19	chr1	+	44808482	44815585	3520	protein_coding	BTB_(POZ)_domain_containing_19
ENSG00000188938	2760.46609386989	233.274073187944	-3.56415924452619	1.15406273671636e-14	2.36320769340556e-13	FAM120AOS	chr9	-	93446494	93453592	3717	protein_coding	family_with_sequence_similarity_120A_opposite_strand
ENSG00000181104	28.4325721119042	441.469918600492	3.95042216209629	1.16815555879512e-14	2.39028616238278e-13	F2R	chr5	+	76716043	76735781	4066	protein_coding	coagulation_factor_II_(thrombin)_receptor
ENSG00000187715	7.33214453489527	195.123001136839	4.70919834864586	1.19335667644941e-14	2.44003732037436e-13	KBTBD12	chr3	+	127915232	127987671	5818	protein_coding	kelch_repeat_and_BTB_(POZ)_domain_containing_12
ENSG00000106804	597.224028697722	41.4286646691825	-3.84581870121152	1.22249892217099e-14	2.49776692857537e-13	C5	chr9	-	120952335	121050276	6533	protein_coding	complement_component_5
ENSG00000177990	0.9101298099858	114.460731522431	6.78090751836988	1.24368675918762e-14	2.53917071747726e-13	DPY19L2	chr12	-	63558913	63668939	5646	protein_coding	dpy-19-like_2_(C._elegans)
ENSG00000203814	179.804535042989	5.45768452873822	-5.01244854631056	1.26924005547301e-14	2.5894191962584e-13	HIST2H2BF	chr1	-	149782689	149812373	3196	protein_coding	histone_cluster_2_H2bf
ENSG00000140961	539.427484502571	35.9785092207799	-3.90188783746689	1.28785534800885e-14	2.62544921612983e-13	OSGIN1	chr16	+	83948282	83966332	3460	protein_coding	oxidative_stress_induced_growth_inhibitor_1
ENSG00000167981	166.96085744056	4.36767330927077	-5.2195033124124	1.33019200659141e-14	2.70974891653854e-13	ZNF597	chr16	-	3432422	3443542	5513	protein_coding	zinc_finger_protein_597
ENSG00000189068	1.38777878078145e-17	98.110270460225	9.62340599917071	1.35073943042655e-14	2.74956958372765e-13	VSTM1	chr19	-	54040825	54063953	1111	protein_coding	V-set_and_transmembrane_domain_containing_1
ENSG00000166897	13.7540369826991	264.884961120201	4.25433970017851	1.40106346287063e-14	2.8498998736986e-13	ELFN2	chr22	-	37367960	37427470	8782	protein_coding	extracellular_leucine-rich_repeat_and_fibronectin_type_III_domain_containing_2
ENSG00000124839	659.607600097293	46.8788198893735	-3.81129019009498	1.42056596778867e-14	2.88743419661168e-13	RAB17	chr2	-	237574322	237601614	4783	protein_coding	RAB17_member_RAS_oncogene_family
ENSG00000175315	5.49730390528178	167.872234978462	4.89935419289879	1.49382852408461e-14	3.03410474452369e-13	CST6	chr11	+	66011841	66013505	759	protein_coding	cystatin_E/M
ENSG00000172461	13.7540369826991	263.794930505762	4.24839323545904	1.51176385605127e-14	3.0682669966986e-13	FUT9	chr6	+	96015984	96215612	13719	protein_coding	fucosyltransferase_9_(alpha_(13)_fucosyltransferase)
ENSG00000170476	140.356096037603	2.18769296388965	-5.92978349484899	1.5162757024329e-14	3.07515472659345e-13	MZB1	chr5	-	139387480	139390081	2273	protein_coding	marginal_zone_B_and_B1_cell-specific_protein
ENSG00000114737	225.67481111022	9.81777552253388	-4.50644909575857	1.61200193133016e-14	3.26688762811428e-13	CISH	chr3	-	50606490	50611831	5112	protein_coding	cytokine_inducible_SH2-containing_protein
ENSG00000240875	477.043912835934	31.6183847293665	-3.91035357338127	1.61883464129376e-14	3.27831895951543e-13	LINC00886	chr3	-	156747346	156817062	3822	lincRNA	long_intergenic_non-protein_coding_RNA_886
ENSG00000279312	1.38777878078145e-17	97.0202397017759	9.60730688549897	1.62981782514278e-14	3.29813245101189e-13	RP3-331H24.7	chr6	-	71373253	71375387	2135	TEC	NA
ENSG00000134242	284.388762974124	14.1778906812214	-4.31495530680325	1.64848754028433e-14	3.33345998862936e-13	PTPN22	chr1	-	113813811	113871759	4503	protein_coding	protein_tyrosine_phosphatase_non-receptor_type_22_(lymphoid)
ENSG00000135338	24.7629422886952	388.05841941876	3.96281074996284	1.69721522128295e-14	3.42947213817065e-13	LCA5	chr6	-	79484991	79537458	5964	protein_coding	Leber_congenital_amaurosis_5
ENSG00000278962	0.9101298099858	113.370700801306	6.76711679660884	1.72816265430459e-14	3.48944208194056e-13	RP11-399B17.1	chr2	+	112188364	112190635	2272	TEC	NA
ENSG00000185332	177.052318427913	5.45768452873822	-4.99021126034429	1.75939082794508e-14	3.54989047390445e-13	TMEM105	chr17	-	81311270	81330674	3794	protein_coding	transmembrane_protein_105
ENSG00000163141	260.536220173228	11.9978317798155	-4.42736051915067	1.76130760977877e-14	3.55115253493591e-13	BNIPL	chr1	+	151036570	151047600	2892	protein_coding	BCL2/adenovirus_E1B_19kD_interacting_protein_like
ENSG00000117519	510.070509623904	5732.47836312075	3.49004807612759	1.78048073711162e-14	3.58717954222027e-13	CNN3	chr1	-	94896949	94927278	2838	protein_coding	calponin_3_acidic
ENSG00000130475	344.937524877594	3912.12729291696	3.50303973326326	1.82093938806557e-14	3.66600688954549e-13	FCHO1	chr19	+	17747718	17788568	5694	protein_coding	FCH_domain_only_1
ENSG00000153029	1379.77088420919	113.370700801306	-3.60395809640092	1.83018532275625e-14	3.68192586401753e-13	MR1	chr1	+	181033425	181061938	9348	protein_coding	major_histocompatibility_complex_class_I-related
ENSG00000149403	5.49730390528178	165.692173666079	4.88050923828947	1.88701049409757e-14	3.79347043846326e-13	GRIK4	chr11	+	120511759	120988904	7459	protein_coding	glutamate_receptor_ionotropic_kainate_4
ENSG00000138759	144.025718364465	1698.27518238694	3.55845490288898	1.90234836748334e-14	3.82151077093933e-13	FRAS1	chr4	+	78057570	78544269	20379	protein_coding	Fraser_extracellular_matrix_complex_subunit_1
ENSG00000143554	760.522200713635	57.7791296604884	-3.71570020105042	1.96320155785127e-14	3.94087635346479e-13	SLC27A3	chr1	+	153774354	153780157	5470	protein_coding	solute_carrier_family_27_(fatty_acid_transporter)_member_3
ENSG00000186212	138.521284865009	2.18769296388965	-5.91081733039005	1.99103563950065e-14	3.99383450925656e-13	SOWAHB	chr4	-	76894928	76898147	3220	protein_coding	sosondowah_ankyrin_repeat_domain_family_member_B
ENSG00000130176	1.82754864465077	112.280670078068	5.84209496675865	2.04047707131558e-14	4.09002623456631e-13	CNN1	chr19	+	11538717	11550323	2887	protein_coding	calponin_1_basic_smooth_muscle
ENSG00000104325	3001.74372839934	262.704899891071	-3.51370655281569	2.05522988454633e-14	4.11659701783749e-13	DECR1	chr8	+	90001405	90052092	3507	protein_coding	24-dienoyl-CoA_reductase_1_mitochondrial
ENSG00000140284	524.748997067954	35.9785092207799	-3.8620961438433	2.20848849224754e-14	4.42035240358803e-13	SLC27A2	chr15	+	50182196	50236395	2802	protein_coding	solute_carrier_family_27_(fatty_acid_transporter)_member_2
ENSG00000114270	169.713074084226	1968.60276664011	3.53497097141757	2.21655985440749e-14	4.43328091316803e-13	COL7A1	chr3	-	48564073	48595267	11071	protein_coding	collagen_type_VII_alpha_1
ENSG00000166145	2108.19081561826	180.95260278734	-3.541479046431	2.23136696102177e-14	4.45965281940841e-13	SPINT1	chr15	+	40844018	40858207	3542	protein_coding	serine_peptidase_inhibitor_Kunitz_type_1
ENSG00000183734	150.447557381933	3.27767348587998	-5.47112328632579	2.24632990949471e-14	4.4830420058791e-13	ASCL2	chr11	-	2268495	2270952	1852	protein_coding	achaete-scute_family_bHLH_transcription_factor_2
ENSG00000168062	4.57987785670322	151.521775047461	5.00828890334581	2.24632990949471e-14	4.4830420058791e-13	BATF2	chr11	-	64987943	64997045	2844	protein_coding	basic_leucine_zipper_transcription_factor_ATF-like_2
ENSG00000117984	15565.6114233095	1423.58747572833	-3.45065281515104	2.25640238147531e-14	4.49987830985877e-13	CTSD	chr11	-	1752752	1763992	2999	protein_coding	cathepsin_D
ENSG00000249574	1.38777878078145e-17	94.840178175854	9.57455947019294	2.38309497121716e-14	4.73879210437043e-13	AC226118.1	chr7	+	379359	382712	2146	lincRNA	NA
ENSG00000258535	1.38777878078145e-17	94.840178175854	9.57455947019294	2.38309497121716e-14	4.73879210437043e-13	RP11-280K24.4	chr14	+	51765276	51825422	5982	sense_overlapping	NA
ENSG00000125872	1.38777878078145e-17	94.840178175854	9.57455947019294	2.38309497121716e-14	4.73879210437043e-13	LRRN4	chr20	-	6040778	6054049	2692	protein_coding	leucine_rich_repeat_neuronal_4
ENSG00000207425	93.5684083346785	1.38777878078145e-17	-9.55532951808975	2.38309497121716e-14	4.73879210437043e-13	Y_RNA	chr16	-	14915457	14915556	100	misc_RNA	Y_RNA
ENSG00000231389	0.9101298099858	111.190639352668	6.73913346239836	2.41190814583222e-14	4.78916143816114e-13	HLA-DPA1	chr6	-	33064569	33080775	5748	protein_coding	major_histocompatibility_complex_class_II_DP_alpha_1
ENSG00000168772	1.82754864465077	111.190639352668	5.82803545313213	2.41190814583222e-14	4.78916143816114e-13	CXXC4	chr4	-	104468312	104494901	5819	protein_coding	CXXC_finger_protein_4
ENSG00000149596	8.2495612111708	199.483123686033	4.57381445353956	2.41982694738051e-14	4.80141853390413e-13	JPH2	chr20	-	44111695	44187578	5943	protein_coding	junctophilin_2
ENSG00000262185	7.33214453489527	187.492786653909	4.65168477747573	2.45314614932814e-14	4.86402107084882e-13	RP11-462G12.1	chr16	-	3947609	3950444	1394	sense_overlapping	NA
ENSG00000044459	33.9370143556858	479.620989351675	3.81573472190055	2.49292778346053e-14	4.93933767816629e-13	CNTLN	chr9	+	17134982	17503923	11064	protein_coding	centlein
ENSG00000105255	106.412088047543	1274.25328594617	3.58026910544085	2.52684040759161e-14	5.00292570548429e-13	FSD1	chr19	+	4304600	4323843	3111	protein_coding	fibronectin_type_III_and_SPRY_domain_containing_1
ENSG00000158373	837.584259260253	65.4093460398824	-3.67631318313864	2.57584797851313e-14	5.09628742856759e-13	HIST1H2BD	chr6	+	26158146	26171349	871	protein_coding	histone_cluster_1_H2bd
ENSG00000237161	1.82754864465077	110.100608625059	5.81383757565072	2.85415934454743e-14	5.64286384862681e-13	RP11-32B5.1	chr15	-	21293653	21295201	1549	processed_pseudogene	NA
ENSG00000178752	11.9192148715908	233.274073187944	4.27554765993103	2.8574511375234e-14	5.64531348656831e-13	FAM132B	chr2	+	238158982	238168900	3572	protein_coding	family_with_sequence_similarity_132_member_B
ENSG00000162711	1.38777878078145e-17	93.7501474082334	9.55790273008478	2.88798797359368e-14	5.70154754212489e-13	NLRP3	chr1	+	247416156	247449108	4757	protein_coding	NLR_family_pyrin_domain_containing_3
ENSG00000184908	2.74500333963777	124.271007924555	5.43426224876231	2.91059614729951e-14	5.7379429854397e-13	CLCNKB	chr1	+	16043736	16057308	2939	protein_coding	chloride_channel_voltage-sensitive_Kb
ENSG00000134198	2.74500333963777	124.271007924555	5.43426224876231	2.91059614729951e-14	5.7379429854397e-13	TSPAN2	chr1	-	115048011	115089500	3410	protein_coding	tetraspanin_2
ENSG00000158163	8.2495612111708	198.393093049545	4.56591420129205	2.94953082730812e-14	5.81053347290835e-13	DZIP1L	chr3	-	138061990	138115818	5045	protein_coding	DAZ_interacting_zinc_finger_protein_1-like
ENSG00000272405	287.140979441062	15.2679207244481	-4.22282653636364	2.95664435241692e-14	5.82037769046655e-13	RP11-284F21.10	chr1	-	156641666	156644887	3222	antisense	NA
ENSG00000144596	3.66244545564338	137.351376248624	5.17917605253337	3.01277832017128e-14	5.92663924056011e-13	GRIP2	chr3	-	14489111	14542081	11704	protein_coding	glutamate_receptor_interacting_protein_2
ENSG00000049323	2550.3802447777	225.643858818974	-3.49791937858726	3.01885070385367e-14	5.93433975744673e-13	LTBP1	chr2	+	32946972	33399509	7329	protein_coding	latent_transforming_growth_factor_beta_binding_protein_1
ENSG00000020181	26.5977574016326	398.958725388868	3.90016884286513	3.03444370492707e-14	5.96073116637139e-13	ADGRA2	chr8	+	37784191	37844896	7061	protein_coding	adhesion_G_protein-coupled_receptor_A2
ENSG00000173436	331.176442686091	19.628043016514	-4.06860696975398	3.03919579780179e-14	5.96580468489272e-13	MINOS1	chr1	+	19596977	19629821	5227	protein_coding	mitochondrial_inner_membrane_organizing_system_1
ENSG00000111348	19.258493690133	320.476522178235	4.04735675932492	3.2237571822491e-14	6.32357676669277e-13	ARHGDIB	chr12	-	14942017	14961728	2102	protein_coding	Rho_GDP_dissociation_inhibitor_(GDI)_beta
ENSG00000113070	20.1759022113556	332.466858819036	4.03363668369896	3.22941666922502e-14	6.330163066312e-13	HBEGF	chr5	-	140332843	140346631	3018	protein_coding	heparin-binding_EGF-like_growth_factor
ENSG00000174705	161.456424126895	1846.51934150089	3.5145087357405	3.26903153285361e-14	6.40325044052758e-13	SH3PXD2B	chr5	-	172325181	172454523	7977	protein_coding	SH3_and_PX_domains_2B
ENSG00000145242	0.9101298099858	109.01057789519	6.71059659313055	3.38135421164197e-14	6.61854962095131e-13	EPHA5	chr4	-	65319563	65670495	9833	protein_coding	EPH_receptor_A5
ENSG00000173727	95.4032197703369	1136.90943252278	3.57309707745573	3.47925935063448e-14	6.80534220496435e-13	CMB9-22P13.1	chr11	+	65455258	65466720	1480	lincRNA	NA
ENSG00000142627	269.710275116339	2985.60129900283	3.46789261982675	3.65546914144669e-14	7.14492230695987e-13	EPHA2	chr1	-	16124337	16156087	4159	protein_coding	EPH_receptor_A2
ENSG00000146476	6586.96424366861	607.154568351727	-3.4392287738723	3.6755578782702e-14	7.17908502914124e-13	ARMT1	chr6	+	151452258	151470101	2819	protein_coding	acidic_residue_methyltransferase_1
ENSG00000168765	587.13256860826	43.6087267853336	-3.74745389764227	3.70798112481877e-14	7.23727387605685e-13	GSTM4	chr1	+	109656081	109674836	5460	protein_coding	glutathione_S-transferase_mu_4
ENSG00000178031	7.33214453489527	184.222694723541	4.62631645907103	3.73803508878273e-14	7.2907590763556e-13	ADAMTSL1	chr9	+	18473894	18910950	13172	protein_coding	ADAMTS_like_1
ENSG00000124678	2.74500333963777	122.090946514791	5.40875294968478	3.95317649580801e-14	7.6885648381341e-13	TCP11	chr6	-	35118071	35148610	3306	protein_coding	t-complex_11_testis-specific
ENSG00000253570	2.74500333963777	122.090946514791	5.40875294968478	3.95317649580801e-14	7.6885648381341e-13	RNF5P1	chr8	-	38600661	38601200	540	processed_pseudogene	ring_finger_protein_5_E3_ubiquitin_protein_ligase_pseudogene_1
ENSG00000205663	120.17317274351	1.09771269193672	-6.6301058836039	3.95317649580801e-14	7.6885648381341e-13	RP11-706O15.5	chrX	-	3891438	3920746	3700	lincRNA	NA
ENSG00000136542	2.74500333963777	122.090946514791	5.40875294968478	3.95317649580801e-14	7.6885648381341e-13	GALNT5	chr2	+	157257598	157314211	6818	protein_coding	polypeptide_N-acetylgalactosaminyltransferase_5
ENSG00000073849	62.3766100477061	779.379401008274	3.64042712704086	3.97098915001625e-14	7.7177507148125e-13	ST6GAL1	chr3	+	186930485	187078553	9151	protein_coding	ST6_beta-galactosamide_alpha-26-sialyltranferase_1
ENSG00000128016	700.890845826604	54.5090368167509	-3.68179891236827	4.14050993183209e-14	8.04153697989508e-13	ZFP36	chr19	+	39406813	39409412	2010	protein_coding	ZFP36_ring_finger_protein
ENSG00000121316	26.5977574016326	392.41854180781	3.87632960443234	4.34472530296809e-14	8.43220116844922e-13	PLBD1	chr12	-	14503661	14568349	2841	protein_coding	phospholipase_B_domain_containing_1
ENSG00000109339	191.730806963904	7.63772441976772	-4.62884680823774	4.40285802933751e-14	8.53899849540274e-13	MAPK10	chr4	-	86015123	86594131	9816	protein_coding	mitogen-activated_protein_kinase_10
ENSG00000242574	2.74500333963777	121.000915807254	5.39582713886734	4.61361280686362e-14	8.94143522209699e-13	HLA-DMB	chr6	-	32934629	32941070	4655	protein_coding	major_histocompatibility_complex_class_II_DM_beta
ENSG00000104044	0.9101298099858	106.83051642847	6.68148384730336	4.76241921865473e-14	9.2233303473397e-13	OCA2	chr15	-	27754875	28099358	3299	protein_coding	oculocutaneous_albinism_II
ENSG00000148450	621.993976177385	46.8788198893735	-3.72660016122663	4.79329895939202e-14	9.27660201845461e-13	MSRB2	chr10	+	23095506	23122013	2052	protein_coding	methionine_sulfoxide_reductase_B2
ENSG00000228203	1.38777878078145e-17	90.4800550857957	9.50674658853176	5.18667674433361e-14	1.00027206974697e-12	RNF144A-AS1	chr2	-	6912277	6918709	4648	processed_transcript	RNF144A_antisense_RNA_1
ENSG00000107295	1.38777878078145e-17	90.4800550857957	9.50674658853176	5.18667674433361e-14	1.00027206974697e-12	SH3GL2	chr9	+	17579082	17797129	2682	protein_coding	SH3-domain_GRB2-like_2
ENSG00000223572	88.9813796634552	1.38777878078145e-17	-9.48291585475336	5.18667674433361e-14	1.00027206974697e-12	CKMT1A	chr15	+	43692886	43699222	3109	protein_coding	creatine_kinase_mitochondrial_1A
ENSG00000142319	88.9813796634552	1.38777878078145e-17	-9.48291585475336	5.18667674433361e-14	1.00027206974697e-12	SLC6A3	chr5	-	1392790	1445430	4461	protein_coding	solute_carrier_family_6_(neurotransmitter_transporter)_member_3
ENSG00000254024	88.9813796634552	1.38777878078145e-17	-9.48291585475336	5.18667674433361e-14	1.00027206974697e-12	KB-1562D12.1	chr8	-	101461177	101492499	491	antisense	NA
ENSG00000105642	2.74500333963777	119.910885097898	5.3827844716232	5.38953524881424e-14	1.03845938214317e-12	KCNN1	chr19	+	17951293	18000080	3981	protein_coding	potassium_channel_calcium_activated_intermediate/small_conductance_subfamily_N_alpha_member_1
ENSG00000107736	8.2495612111708	191.852909219103	4.51758203463158	5.39224027380983e-14	1.03845938214317e-12	CDH23	chr10	+	71396934	71815947	18059	protein_coding	cadherin-related_23
ENSG00000108622	0.9101298099858	105.740485691512	6.66670416457084	5.66194957713191e-14	1.08811513152135e-12	ICAM2	chr17	-	64002594	64020634	3243	protein_coding	intercellular_adhesion_molecule_2
ENSG00000010610	0.9101298099858	105.740485691512	6.66670416457084	5.66194957713191e-14	1.08811513152135e-12	CD4	chr12	+	6786858	6820808	4583	protein_coding	CD4_molecule
ENSG00000182752	1.82754864465077	105.740485691512	5.75560615530461	5.66194957713191e-14	1.08811513152135e-12	PAPPA	chr9	+	116153804	116402322	11573	protein_coding	pregnancy-associated_plasma_protein_A_pappalysin_1
ENSG00000172086	961.433996077445	80.669777921781	-3.57319357366866	5.82195336701635e-14	1.11808337672009e-12	KRCC1	chr2	-	88027205	88055729	1753	protein_coding	lysine-rich_coiled-coil_1
ENSG00000010810	74.3028869379177	888.382459479678	3.57732988700272	6.09075758372823e-14	1.16888991144529e-12	FYN	chr6	-	111660332	111873452	7411	protein_coding	FYN_proto-oncogene_Src_family_tyrosine_kinase
ENSG00000179981	415.577746412134	28.3482913321216	-3.86829686790059	6.15830103615986e-14	1.18102815059576e-12	TSHZ1	chr18	+	75210755	75289950	8281	protein_coding	teashirt_zinc_finger_homeobox_1
ENSG00000196405	5539.28721498044	522.132182405437	-3.40692433988953	6.27655794985933e-14	1.2028684333037e-12	EVL	chr14	+	99971449	100144236	10621	protein_coding	Enah/Vasp-like
ENSG00000237289	88.0639739141232	1.38777878078145e-17	-9.4679865151603	6.32410585493307e-14	1.2094522608937e-12	CKMT1B	chr15	+	43593054	43604901	3470	protein_coding	creatine_kinase_mitochondrial_1B
ENSG00000274471	1.38777878078145e-17	89.3900243048503	9.4892833465284	6.32410585493307e-14	1.2094522608937e-12	RP11-228M15.1	chr15	+	23309607	23313276	883	unprocessed_pseudogene	NA
ENSG00000150337	88.0639739141232	1.38777878078145e-17	-9.4679865151603	6.32410585493307e-14	1.2094522608937e-12	FCGR1A	chr1	+	149782671	149792518	2998	protein_coding	Fc_fragment_of_IgG_high_affinity_Ia_receptor_(CD64)
ENSG00000103316	7.33214453489527	178.772541493165	4.58301874239957	6.39237527206706e-14	1.2216588766999e-12	CRYM	chr16	-	21238874	21303083	3782	protein_coding	crystallin_mu
ENSG00000173581	39.4414545240862	521.042151815092	3.71913671331906	6.44576672579815e-14	1.23100715782066e-12	CCDC106	chr19	+	55641062	55653161	2709	protein_coding	coiled-coil_domain_containing_106
ENSG00000249628	15.5888571884922	267.065022348336	4.08711041838934	6.5294906416895e-14	1.24613131254062e-12	LINC00942	chr12	-	1500525	1507318	2417	lincRNA	long_intergenic_non-protein_coding_RNA_942
ENSG00000109586	1815.53847549851	163.512112350302	-3.4720005006481	6.55705199787907e-14	1.25052348816694e-12	GALNT7	chr4	+	173168753	173323967	6865	protein_coding	polypeptide_N-acetylgalactosaminyltransferase_7
ENSG00000168502	135.769068094035	1516.24007520799	3.47998638422316	6.63513962281447e-14	1.26453897967443e-12	MTCL1	chr18	+	8705661	8832778	12665	protein_coding	microtubule_crosslinking_factor_1
ENSG00000157368	0.9101298099858	104.650454952081	6.65177150290256	6.7394914282257e-14	1.28353707595315e-12	IL34	chr16	+	70579895	70660682	2233	protein_coding	interleukin_34
ENSG00000184584	55.0373616926846	675.82649534901	3.61497647043957	6.75579560841166e-14	1.28575179949432e-12	TMEM173	chr5	-	139475534	139482935	3850	protein_coding	transmembrane_protein_173
ENSG00000136944	943.085886927702	79.5797471054497	-3.56499709802437	6.85813383828371e-14	1.30432599368354e-12	LMX1B	chr9	+	126614443	126701032	5830	protein_coding	LIM_homeobox_transcription_factor_1_beta
ENSG00000183696	22.0107186986201	330.286797612869	3.89935539300534	7.02992066379785e-14	1.33607358794129e-12	UPP1	chr7	+	48088628	48108733	4577	protein_coding	uridine_phosphorylase_1
ENSG00000206503	334.846064606744	3563.31750698525	3.41113218916192	7.0390870665038e-14	1.33689180535857e-12	HLA-A	chr6	+	29941260	29945884	2710	protein_coding	major_histocompatibility_complex_class_I_A
ENSG00000112379	5405.34601866554	512.321907090946	-3.39897012851713	7.05001698552206e-14	1.33804359640333e-12	ARFGEF3	chr6	+	138161921	138344663	14877	protein_coding	ARFGEF_family_member_3
ENSG00000157514	3280.63498654451	306.306124306764	-3.42043578390538	7.11777791459036e-14	1.34997248571827e-12	TSC22D3	chrX	-	107713221	107777342	4766	protein_coding	TSC22_domain_family_member_3
ENSG00000218336	137.603879276325	1531.50050335634	3.47508521686012	7.16256096599165e-14	1.35752990438137e-12	TENM3	chr4	+	182143987	182803024	11984	protein_coding	teneurin_transmembrane_protein_3
ENSG00000117477	4.57987785670322	142.801529656901	4.92284318745647	7.23769681572364e-14	1.37082575846567e-12	CCDC181	chr1	-	169394870	169460669	3961	protein_coding	coiled-coil_domain_containing_181
ENSG00000188176	11.9192148715908	222.373766940926	4.20654375122901	7.43395711491884e-14	1.40702859337497e-12	SMTNL2	chr17	+	4583999	4608319	2470	protein_coding	smoothelin-like_2
ENSG00000170836	5512.68245680836	524.312243586015	-3.39396885388311	7.47568826786166e-14	1.4139539412274e-12	PPM1D	chr17	+	60600183	60666280	5044	protein_coding	protein_phosphatase_Mg2+/Mn2+_dependent_1D
ENSG00000111275	36.689234652651	486.161172902729	3.72319072600172	7.48171364122153e-14	1.41412100925933e-12	ALDH2	chr12	+	111766887	111817529	9720	protein_coding	aldehyde_dehydrogenase_2_family_(mitochondrial)
ENSG00000170396	6.41472570341761	165.692173666079	4.6626838389706	7.62118894004897e-14	1.43949393571626e-12	ZNF804A	chr2	+	184598366	184939492	4694	protein_coding	zinc_finger_protein_804A
ENSG00000026652	27.515164803161	391.328511210676	3.82363229367869	7.90461663797977e-14	1.49200317200468e-12	AGPAT4	chr6	-	161129979	161274061	8769	protein_coding	1-acylglycerol-3-phosphate_O-acyltransferase_4
ENSG00000135916	585.297757682563	6112.89903586011	3.38431769882805	7.95579325628516e-14	1.50063285556309e-12	ITM2C	chr2	+	230864639	230879248	2611	protein_coding	integral_membrane_protein_2C
ENSG00000135114	5.49730390528178	153.701836384102	4.77221761001375	8.03849646128014e-14	1.51519322262964e-12	OASL	chr12	-	121019111	121039242	3517	protein_coding	2'-5'-oligoadenylate_synthetase-like
ENSG00000134317	1181.61130571273	103.560424210119	-3.51074209244993	8.04761466670596e-14	1.51587295170603e-12	GRHL1	chr2	+	9951693	10002277	7952	protein_coding	grainyhead-like_transcription_factor_1
ENSG00000197977	186.226373784617	2018.74417339075	3.43739425570324	8.50578126308711e-14	1.60107796383408e-12	ELOVL2	chr6	-	10980759	11044314	3997	protein_coding	ELOVL_fatty_acid_elongase_2
ENSG00000174567	272.462491594274	15.2679207244481	-4.1471605030489	8.57073674074474e-14	1.61220130716293e-12	GOLT1A	chr1	-	204198160	204214092	1136	protein_coding	golgi_transport_1A
ENSG00000198133	704.560467667575	57.7791296604884	-3.60545317108926	9.40980867663986e-14	1.76795819012461e-12	TMEM229B	chr14	-	67447084	67533739	6377	protein_coding	transmembrane_protein_229B
ENSG00000228549	3.66244545564338	128.631130723838	5.08462778470065	9.41162426945361e-14	1.76795819012461e-12	RP11-108M9.3	chr1	+	16870945	16874092	2963	lincRNA	NA
ENSG00000005102	1.38777878078145e-17	88.2999935203614	9.47160612625358	9.44718278234553e-14	1.77342644161969e-12	MEOX1	chr17	-	43640388	43661954	2707	protein_coding	mesenchyme_homeobox_1
ENSG00000111728	0.9101298099858	102.470393465569	6.62143434126715	9.58400419406214e-14	1.79543391921596e-12	ST8SIA1	chr12	-	22063773	22437041	14483	protein_coding	ST8_alpha-N-acetyl-neuraminide_alpha-28-sialyltransferase_1
ENSG00000267530	1.82754864465077	102.470393465569	5.71033633200092	9.58400419406214e-14	1.79543391921596e-12	AC006273.5	chr19	+	782755	785080	870	lincRNA	NA
ENSG00000133640	1.82754864465077	102.470393465569	5.71033633200092	9.58400419406214e-14	1.79543391921596e-12	LRRIQ1	chr12	+	85036314	85263224	7560	protein_coding	leucine-rich_repeats_and_IQ_motif_containing_1
ENSG00000142798	544.014511824071	5623.47530502853	3.36942638406979	9.90152366752532e-14	1.85365420272712e-12	HSPG2	chr1	-	21822245	21937297	17684	protein_coding	heparan_sulfate_proteoglycan_2
ENSG00000044524	8.2495612111708	186.402756011085	4.47603029676059	1.00041817893967e-13	1.87159866251836e-12	EPHA3	chr3	+	89107524	89482134	6674	protein_coding	EPH_receptor_A3
ENSG00000253878	114.668738938863	1.09771269193672	-6.56253885050229	1.01355764646981e-13	1.89489115129614e-12	RP11-347C18.3	chr8	+	94950037	94951396	709	sense_intronic	NA
ENSG00000136167	259.618814677442	14.1778906812214	-4.18354939032308	1.02469567362619e-13	1.91441275274414e-12	LCP1	chr13	-	46125920	46211871	5061	protein_coding	lymphocyte_cytosolic_protein_1_(L-plastin)
ENSG00000077782	370.624878229276	3855.44570270385	3.37839816009903	1.07023808854911e-13	1.99814105045411e-12	FGFR1	chr8	-	38411138	38468834	12698	protein_coding	fibroblast_growth_factor_receptor_1
ENSG00000124216	7.33214453489527	174.412418896327	4.54741994136055	1.10593266531618e-13	2.06338224076392e-12	SNAI1	chr20	+	49982999	49988886	1686	protein_coding	snail_family_zinc_finger_1
ENSG00000119669	2929.26869749677	277.965328474831	-3.3970212699202	1.10860089112344e-13	2.06695817673123e-12	IRF2BPL	chr14	-	77024543	77028699	4157	protein_coding	interferon_regulatory_factor_2_binding_protein-like
ENSG00000162444	0.9101298099858	101.380362718367	6.60602313254713	1.14504037983127e-13	2.13345226868156e-12	RBP7	chr1	+	9997206	10016020	861	protein_coding	retinol_binding_protein_7
ENSG00000277559	85.3117566334282	1.38777878078145e-17	-9.42224853911006	1.15749266522429e-13	2.15082471529279e-12	RP11-434E6.4	chr16	+	54290965	54292422	1458	lincRNA	NA
ENSG00000189184	1.38777878078145e-17	87.2099627322389	9.45370961880966	1.15749266522429e-13	2.15082471529279e-12	PCDH18	chr4	-	137518918	137532494	6686	protein_coding	protocadherin_18
ENSG00000115363	1.38777878078145e-17	87.2099627322389	9.45370961880966	1.15749266522429e-13	2.15082471529279e-12	EVA1A	chr2	-	75469302	75569722	2744	protein_coding	eva-1_homolog_A_(C._elegans)
ENSG00000162687	1.38777878078145e-17	87.2099627322389	9.45370961880966	1.15749266522429e-13	2.15082471529279e-12	KCNT2	chr1	-	196225779	196609225	7100	protein_coding	potassium_channel_sodium_activated_subfamily_T_member_2
ENSG00000120162	5.49730390528178	150.431744377559	4.74121610666862	1.17040207629029e-13	2.17236550942011e-12	MOB3B	chr9	-	27325209	27529781	7087	protein_coding	MOB_kinase_activator_3B
ENSG00000171608	73.3854810815734	850.231389025652	3.53190476135636	1.17066495216923e-13	2.17236550942011e-12	PIK3CD	chr1	+	9651732	9729114	6332	protein_coding	phosphatidylinositol-45-bisphosphate_3-kinase_catalytic_subunit_delta
ENSG00000168505	1330.23098959638	119.910885097898	-3.47037763981192	1.20301007929626e-13	2.230882008815e-12	GBX2	chr2	-	236165236	236168369	2315	protein_coding	gastrulation_brain_homeobox_2
ENSG00000180422	124.760200848875	2.18769296388965	-5.76001834643909	1.26158381140607e-13	2.33792563325326e-12	LINC00304	chr16	+	89159146	89164245	3961	lincRNA	long_intergenic_non-protein_coding_RNA_304
ENSG00000116833	213.74853946236	10.9078032090939	-4.27797164714191	1.27201010279852e-13	2.35565992168769e-12	NR5A2	chr1	+	200027602	200177424	7559	protein_coding	nuclear_receptor_subfamily_5_group_A_member_2
ENSG00000166394	6.41472570341761	161.332051031016	4.6242389770249	1.37110383958694e-13	2.53746478415076e-12	CYB5R2	chr11	-	7665100	7677222	8596	protein_coding	cytochrome_b5_reductase_2
ENSG00000010379	1.38777878078145e-17	86.1199319403898	9.4355883152404	1.42055918004803e-13	2.6219327523826e-12	SLC6A13	chr12	-	220621	262873	4243	protein_coding	solute_carrier_family_6_(neurotransmitter_transporter)_member_13
ENSG00000229153	1.38777878078145e-17	86.1199319403898	9.4355883152404	1.42055918004803e-13	2.6219327523826e-12	EPHA1-AS1	chr7	+	143407813	143523449	5316	antisense	EPHA1_antisense_RNA_1
ENSG00000264575	1.38777878078145e-17	86.1199319403898	9.4355883152404	1.42055918004803e-13	2.6219327523826e-12	LINC00526	chr18	-	5236724	5238598	1875	lincRNA	long_intergenic_non-protein_coding_RNA_526
ENSG00000106034	1.38777878078145e-17	86.1199319403898	9.4355883152404	1.42055918004803e-13	2.6219327523826e-12	CPED1	chr7	+	120988677	121297444	7705	protein_coding	cadherin-like_and_PC-esterase_domain_containing_1
ENSG00000147883	33.0196074811748	429.479582064148	3.69585243086108	1.44846626608417e-13	2.67164793987798e-12	CDKN2B	chr9	-	22002903	22009363	4058	protein_coding	cyclin-dependent_kinase_inhibitor_2B_(p15_inhibits_CDK4)
ENSG00000025708	33.9370143556858	440.379888006591	3.69261986332717	1.45510775578323e-13	2.6820990879219e-12	TYMP	chr22	-	50525752	50530056	3320	protein_coding	thymidine_phosphorylase
ENSG00000132563	17.4236759818468	276.875297863203	3.97987222153004	1.4661049641756e-13	2.70055945209599e-12	REEP2	chr5	+	138439017	138446969	3284	protein_coding	receptor_accessory_protein_2
ENSG00000148700	144.943123942517	1547.85096208635	3.41550876891508	1.47027584180768e-13	2.70642944615482e-12	ADD3	chr10	+	109996368	110135565	6541	protein_coding	adducin_3
ENSG00000009307	82637.1241732097	8313.6707786771	-3.31321451686862	1.50378717471488e-13	2.76626428707918e-12	CSDE1	chr1	-	114716913	114758676	5778	protein_coding	cold_shock_domain_containing_E1_RNA_binding
ENSG00000071575	26.5977574016326	367.347838050978	3.78111252756175	1.63442097314193e-13	3.00455957101445e-12	TRIB2	chr2	+	12716889	12742734	4588	protein_coding	tribbles_pseudokinase_2
ENSG00000115112	0.9101298099858	100.290331968453	6.59044551847985	1.64072211579007e-13	3.01211608186533e-12	TFCP2L1	chr2	-	121216587	121285207	9372	protein_coding	transcription_factor_CP2-like_1
ENSG00000185269	0.9101298099858	100.290331968453	6.59044551847985	1.64072211579007e-13	3.01211608186533e-12	NOTUM	chr17	-	81952507	81961840	3019	protein_coding	notum_pectinacetylesterase_homolog_(Drosophila)
ENSG00000138798	9.16697626675744	191.852909219103	4.36772425194887	1.644323493429e-13	3.01671383540968e-12	EGF	chr4	+	109912884	110012266	6127	protein_coding	epidermal_growth_factor
ENSG00000136379	1715.541280892	161.332051031016	-3.40962341307286	1.65891137199851e-13	3.04144810942206e-12	ABHD17C	chr15	+	80679684	80755621	3627	protein_coding	abhydrolase_domain_containing_17C
ENSG00000143409	2076.99903015441	198.393093049545	-3.38730751219513	1.72555053470213e-13	3.16151667254119e-12	FAM63A	chr1	-	150996086	151008375	3792	protein_coding	family_with_sequence_similarity_63_member_A
ENSG00000105141	83.4769450841662	1.38777878078145e-17	-9.39093058254013	1.74637550574711e-13	3.19265339601446e-12	CASP14	chr19	+	15049384	15058293	3497	protein_coding	caspase_14
ENSG00000182255	1.38777878078145e-17	85.0299011447181	9.41723649635104	1.74637550574711e-13	3.19265339601446e-12	KCNA4	chr11	-	30009741	30017023	4195	protein_coding	potassium_channel_voltage_gated_shaker_related_subfamily_A_member_4
ENSG00000145861	1.38777878078145e-17	85.0299011447181	9.41723649635104	1.74637550574711e-13	3.19265339601446e-12	C1QTNF2	chr5	-	160347751	160370641	2414	protein_coding	C1q_and_tumor_necrosis_factor_related_protein_2
ENSG00000145246	33.0196074811748	426.20949028016	3.68482861761089	1.74718859714256e-13	3.19265339601446e-12	ATP10D	chr4	+	47485288	47593486	7965	protein_coding	ATPase_class_V_type_10D
ENSG00000273802	482.548345637982	37.0685403274115	-3.69825141668285	1.89513235774219e-13	3.46069289311208e-12	HIST1H2BG	chr6	-	26215159	26216692	1534	protein_coding	histone_cluster_1_H2bg
ENSG00000165072	2.74500333963777	112.280670078068	5.28802701225545	1.93739272154257e-13	3.53551673756751e-12	MAMDC2	chr9	+	70043581	70226970	3854	protein_coding	MAM_domain_containing_2
ENSG00000166796	0.9101298099858	99.2003012157612	6.5746978662189	1.96784779789609e-13	3.58871235344432e-12	LDHC	chr11	+	18412307	18452058	2095	protein_coding	lactate_dehydrogenase_C
ENSG00000189410	28.4325721119042	382.608266430485	3.74403387879392	2.02986418510577e-13	3.69935685583788e-12	SH2D5	chr1	-	20719732	20732837	4423	protein_coding	SH2_domain_containing_5
ENSG00000111252	136.68647368601	1445.38808737183	3.40124426606633	2.04045974426539e-13	3.71620420046639e-12	SH2B3	chr12	+	111405948	111451623	5682	protein_coding	SH2B_adaptor_protein_3
ENSG00000009694	1.38777878078145e-17	83.9398703451251	9.39864822187252	2.15062909504043e-13	3.90908464922054e-12	TENM1	chrX	-	124375903	124963817	12896	protein_coding	teneurin_transmembrane_protein_1
ENSG00000172318	1.38777878078145e-17	83.9398703451251	9.39864822187252	2.15062909504043e-13	3.90908464922054e-12	B3GALT1	chr2	+	167868948	167874041	5094	protein_coding	Beta-13-galactosyltransferase_1
ENSG00000048740	1.38777878078145e-17	83.9398703451251	9.39864822187252	2.15062909504043e-13	3.90908464922054e-12	CELF2	chr10	+	11005321	11336675	10427	protein_coding	CUGBP_Elav-like_family_member_2
ENSG00000100100	409.155908112373	30.5283535964229	-3.73937202401867	2.22357825505059e-13	4.03901093739407e-12	PIK3IP1	chr22	-	31281593	31292534	3805	protein_coding	phosphoinositide-3-kinase_interacting_protein_1
ENSG00000121361	2.74500333963777	111.190639352668	5.27396749862893	2.28406172442478e-13	4.14613739164396e-12	KCNJ8	chr12	-	21764955	21775581	2484	protein_coding	potassium_channel_inwardly_rectifying_subfamily_J_member_8
ENSG00000135373	121.090578369098	2.18769296388965	-5.71699321775497	2.2905844534319e-13	4.15523502993606e-12	EHF	chr11	+	34621093	34661057	4386	protein_coding	ets_homologous_factor
ENSG00000177409	0.9101298099858	98.110270460225	6.55877642263907	2.36333456806604e-13	4.28438127596467e-12	SAMD9L	chr7	-	93130055	93148369	7135	protein_coding	sterile_alpha_motif_domain_containing_9-like
ENSG00000181274	1557.7475425857	148.251683034498	-3.39232454462603	2.3969439976177e-13	4.34244775220582e-12	FRAT2	chr10	-	97332497	97334709	2213	protein_coding	frequently_rearranged_in_advanced_T-cell_lymphomas_2
ENSG00000006747	39.4414545240862	488.341234086042	3.62564791305228	2.41577513572614e-13	4.37368215981597e-12	SCIN	chr7	+	12570577	12660179	11623	protein_coding	scinderin
ENSG00000133943	29.3499793347138	389.148450016151	3.72287191962729	2.48532986367413e-13	4.49664845926989e-12	C14orf159	chr14	+	91060333	91225632	7212	protein_coding	chromosome_14_open_reading_frame_159
ENSG00000108443	9894.21090589679	1013.73597662134	-3.28675536327402	2.49545287018138e-13	4.51199535718988e-12	RPS6KB1	chr17	+	59893046	59950564	7687	protein_coding	ribosomal_protein_S6_kinase_70kDa_polypeptide_1
ENSG00000124212	6.41472570341761	155.88189771665	4.57469585854908	2.50136265306495e-13	4.5197092195755e-12	PTGIS	chr20	-	49503874	49568146	5579	protein_coding	prostaglandin_I2_(prostacyclin)_synthase
ENSG00000227827	10.0843900675811	198.393093049545	4.28031052503489	2.57211808912566e-13	4.64266872472841e-12	RP11-958N24.2	chr16	+	16356224	16377507	9932	unprocessed_pseudogene	NA
ENSG00000041353	1290.78255499235	121.000915807254	-3.41390852830232	2.57278903912079e-13	4.64266872472841e-12	RAB27B	chr18	+	54717860	54895516	7432	protein_coding	RAB27B_member_RAS_oncogene_family
ENSG00000163349	16988.5072826471	1751.68668089354	-3.27765724663244	2.67067578852679e-13	4.81614785969019e-12	HIPK1	chr1	+	113929192	113977869	9280	protein_coding	homeodomain_interacting_protein_kinase_1
ENSG00000203799	108.246899377709	1.09771269193672	-6.47949045457002	2.69568496745256e-13	4.85488096201133e-12	CCDC162P	chr6	+	109285485	109355063	5378	unitary_pseudogene	coiled-coil_domain_containing_162_pseudogene
ENSG00000163793	2.74500333963777	110.100608625059	5.25976962114752	2.69568496745256e-13	4.85488096201133e-12	DNAJC5G	chr2	+	27275421	27281499	2350	protein_coding	DnaJ_heat_shock_protein_family_(Hsp40)_member_C5_gamma
ENSG00000148735	185.308968252308	8.72774907734345	-4.38998555205046	2.73577495679455e-13	4.9238577936392e-12	PLEKHS1	chr10	+	113751454	113783429	5402	protein_coding	pleckstrin_homology_domain_containing_S1
ENSG00000185436	11.0018028728265	197.303062412522	4.14830221961899	2.83622322209396e-13	5.10130639835226e-12	IFNLR1	chr1	-	24154157	24187959	4923	protein_coding	interferon_lambda_receptor_1
ENSG00000260855	0.9101298099858	97.0202397017759	6.54267730896732	2.84213437179008e-13	5.10526044144996e-12	RP11-439E19.10	chr1	+	246772301	246775772	3472	antisense	NA
ENSG00000109738	1.82754864465077	97.0202397017759	5.63157929970109	2.84213437179008e-13	5.10526044144996e-12	GLRB	chr4	+	157076057	157172090	3459	protein_coding	glycine_receptor_beta
ENSG00000253320	142.190907204017	4.36767330927077	-4.98802036990448	2.87570759694773e-13	5.15882809025829e-12	AZIN1-AS1	chr8	+	102864300	102977876	3695	antisense	AZIN1_antisense_RNA_1
ENSG00000270168	142.190907204017	4.36767330927077	-4.98802036990448	2.87570759694773e-13	5.15882809025829e-12	LA16c-380H5.3	chr16	+	2988256	3002016	2062	protein_coding	NA
ENSG00000187837	781.622526275785	69.7694695425418	-3.48362908543432	2.89081047354361e-13	5.18254099301974e-12	HIST1H1C	chr6	-	26055787	26056428	642	protein_coding	histone_cluster_1_H1c
ENSG00000122644	46.7807059051215	550.472977741828	3.55294282623182	2.9620782623599e-13	5.30684783668793e-12	ARL4A	chr7	+	12686856	12690934	3561	protein_coding	ADP_ribosylation_factor_like_GTPase_4A
ENSG00000165272	1001.7998361983	92.6601166374037	-3.43287045266792	3.01153741457242e-13	5.39194599206745e-12	AQP3	chr9	-	33441154	33447611	2928	protein_coding	aquaporin_3_(Gill_blood_group)
ENSG00000143443	383.468554874372	28.3482913321216	-3.75232494834536	3.05292678263065e-13	5.46249443390537e-12	C1orf56	chr1	+	151047740	151051986	2331	protein_coding	chromosome_1_open_reading_frame_56
ENSG00000079308	139.438690452092	1445.38808737183	3.37251119167194	3.07478605674292e-13	5.49802934632555e-12	TNS1	chr2	-	217799789	218002995	15595	protein_coding	tensin_1
ENSG00000008311	39.4414545240862	481.801050535548	3.60620054352473	3.09492698252745e-13	5.53044749489847e-12	AASS	chr7	-	122075647	122144280	4591	protein_coding	aminoadipate-semialdehyde_synthase
ENSG00000225614	194.483023544591	9.81777552253388	-4.29198264791881	3.12862699861242e-13	5.58703708369092e-12	ZNF469	chr16	+	88427471	88440757	13287	protein_coding	zinc_finger_protein_469
ENSG00000099994	410.990719055533	31.6183847293665	-3.69540119422613	3.24491522510662e-13	5.79094183034764e-12	SUSD2	chr22	+	24181259	24189110	5279	protein_coding	sushi_domain_containing_2
ENSG00000114861	2406.34758840297	239.814256919075	-3.3262307911618	3.24808976600962e-13	5.79284803210315e-12	FOXP1	chr3	-	70954693	71583989	13628	protein_coding	forkhead_box_P1
ENSG00000099958	4.57987785670322	131.901222806631	4.8083873154656	3.26929200256527e-13	5.82310876700437e-12	DERL3	chr22	-	23834503	23839128	3796	protein_coding	derlin_3
ENSG00000141837	4.57987785670322	131.901222806631	4.8083873154656	3.26929200256527e-13	5.82310876700437e-12	CACNA1A	chr19	-	13206442	13623990	10920	protein_coding	calcium_channel_voltage-dependent_P/Q_type_alpha_1A_subunit
ENSG00000172828	15.5888571884922	246.35444063851	3.97070797482904	3.27806895867856e-13	5.83496274644784e-12	CES3	chr16	+	66961237	66975148	4935	protein_coding	carboxylesterase_3
ENSG00000178685	67.8810457534503	749.948575202335	3.46314404373057	3.30607530476859e-13	5.88100756509967e-12	PARP10	chr8	-	143977153	144012772	6033	protein_coding	poly(ADP-ribose)_polymerase_family_member_10
ENSG00000149243	53.2025494404424	614.78478246681	3.52722711384943	3.35183064208396e-13	5.9585452157693e-12	KLHL35	chr11	-	75422394	75430629	5041	protein_coding	kelch_like_family_member_35
ENSG00000141526	466.95245269426	4559.60545802659	3.28719234931838	3.40259654309978e-13	6.04488420747979e-12	SLC16A3	chr17	+	82228397	82261129	8995	protein_coding	solute_carrier_family_16_(monocarboxylate_transporter)_member_3
ENSG00000197565	1.82754864465077	95.9302089403432	5.6152985058446	3.42261743279982e-13	6.07652692184815e-12	COL4A6	chrX	-	108155607	108439497	9282	protein_coding	collagen_type_IV_alpha_6
ENSG00000145687	429.338828471287	33.7984469860363	-3.66254230207811	3.46429206660978e-13	6.14654813702164e-12	SSBP2	chr5	-	81413021	81751797	11284	protein_coding	single-stranded_DNA_binding_protein_2
ENSG00000166130	246.775137705789	2455.84643653135	3.31425175147363	3.51150178048024e-13	6.22629338910297e-12	IKBIP	chr12	-	98613405	98645113	4163	protein_coding	IKBKB_interacting_protein
ENSG00000236830	151.364962950567	5.45768452873822	-4.76424850410298	3.61300146118365e-13	6.39801372723834e-12	CBR3-AS1	chr21	-	36131767	36175815	8459	processed_transcript	CBR3_antisense_RNA_1
ENSG00000131773	6.41472570341761	152.611805716302	4.54413221846658	3.61300146118365e-13	6.39801372723834e-12	KHDRBS3	chr8	+	135457457	135656722	8645	protein_coding	KH_domain_containing_RNA_binding_signal_transduction_associated_3
ENSG00000064195	129.347228901051	3.27767348587998	-5.25331725423828	3.76678682535355e-13	6.66266708887131e-12	DLX3	chr17	-	49990005	49995224	2715	protein_coding	distal-less_homeobox_3
ENSG00000115590	2.74500333963777	107.920547163012	5.23094768998385	3.76729839758368e-13	6.66266708887131e-12	IL1R2	chr2	+	101991844	102028544	3073	protein_coding	interleukin_1_receptor_type_II
ENSG00000274020	252.27957070086	15.2679207244481	-4.03618191833965	3.81102669880943e-13	6.73567128817212e-12	LINC01138	chr1	-	148362995	148460150	3938	lincRNA	long_intergenic_non-protein_coding_RNA_1138
ENSG00000162889	3617.32278829864	369.527899249215	-3.29076283929892	3.9068816869094e-13	6.90065210479739e-12	MAPKAPK2	chr1	+	206684944	206734283	4195	protein_coding	mitogen-activated_protein_kinase-activated_protein_kinase_2
ENSG00000176809	349.524552268396	25.0781979910118	-3.79471320062374	3.96252289834115e-13	6.98995139366773e-12	LRRC37A3	chr17	-	64854312	64919480	7641	protein_coding	leucine-rich_repeat_containing_37_member_A3
ENSG00000159208	349.524552268396	25.0781979910118	-3.79471320062374	3.96252289834115e-13	6.98995139366773e-12	CIART	chr1	+	150282543	150287093	2696	protein_coding	circadian_associated_repressor_of_transcription
ENSG00000251026	78.8899161001786	1.38777878078145e-17	-9.30952562956208	4.05952438092469e-13	7.15647307691089e-12	RP11-138J23.1	chr5	+	104079911	104105403	574	lincRNA	NA
ENSG00000165863	93.5684083346785	1.09771269193672	-6.26953276963062	4.12738809598308e-13	7.25286262157384e-12	C10orf82	chr10	-	116663696	116670264	2411	protein_coding	chromosome_10_open_reading_frame_82
ENSG00000223523	93.5684083346785	1.09771269193672	-6.26953276963062	4.12738809598308e-13	7.25286262157384e-12	AC079613.1	chr2	-	188598791	188839445	797	sense_overlapping	NA
ENSG00000198203	0.9101298099858	94.840178175854	6.5099298936613	4.12738809598308e-13	7.25286262157384e-12	SULT1C2	chr2	+	108288639	108309915	8399	protein_coding	sulfotransferase_family_1C_member_2
ENSG00000129910	1.82754864465077	94.840178175854	5.59883188439507	4.12738809598308e-13	7.25286262157384e-12	CDH15	chr16	+	89171767	89195492	4628	protein_coding	cadherin_15_type_1_M-cadherin_(myotubule)
ENSG00000197915	0.9101298099858	94.840178175854	6.5099298936613	4.12738809598308e-13	7.25286262157384e-12	HRNR	chr1	-	152212082	152224193	9623	protein_coding	hornerin
ENSG00000167785	289.893195906113	19.628043016514	-3.87660991549678	4.15855837649922e-13	7.30297023704375e-12	ZNF558	chr19	-	8806170	8832328	8184	protein_coding	zinc_finger_protein_558
ENSG00000215105	117.420955852447	2.18769296388965	-5.67264541473651	4.21943039463731e-13	7.39570142019889e-12	TTC3P1	chrX	-	75740831	75746911	6081	processed_pseudogene	tetratricopeptide_repeat_domain_3_pseudogene_1
ENSG00000256546	3.66244545564338	118.820854386684	4.97028428081819	4.21943039463731e-13	7.39570142019889e-12	AC156455.1	chr12	+	122063306	122068616	1831	processed_transcript	NA
ENSG00000105219	117.420955852447	2.18769296388965	-5.67264541473651	4.21943039463731e-13	7.39570142019889e-12	CNTD2	chr19	-	40222208	40226690	2039	protein_coding	cyclin_N-terminal_domain_containing_2
ENSG00000164136	11.9192148715908	202.753215592362	4.07335536670163	4.2412514184317e-13	7.42921371071911e-12	IL15	chr4	+	141636599	141733987	7860	protein_coding	interleukin_15
ENSG00000083290	643.094301795232	56.6890987203811	-3.50120673166112	4.35415917321484e-13	7.6221343999097e-12	ULK2	chr17	-	19770829	19867936	9843	protein_coding	unc-51_like_autophagy_activating_kinase_2
ENSG00000088002	376.129311079484	28.3482913321216	-3.72445505477606	4.39340437515228e-13	7.68594234866813e-12	SULT2B1	chr19	+	48552075	48599425	2822	protein_coding	sulfotransferase_family_2B_member_1
ENSG00000279041	105.494682377618	1.09771269193672	-6.44238070226565	4.46110411499211e-13	7.79446151628959e-12	CTD-2373N4.3	chr8	+	30552345	30553766	1422	TEC	NA
ENSG00000224950	105.494682377618	1.09771269193672	-6.44238070226565	4.46110411499211e-13	7.79446151628959e-12	RP5-1086K13.1	chr1	-	116493016	116499212	2302	lincRNA	NA
ENSG00000122707	63.2940160283793	700.897198836935	3.46630847402662	4.46813685267096e-13	7.79684210566651e-12	RECK	chr9	+	36036433	36124451	6045	protein_coding	reversion-inducing-cysteine-rich_protein_with_kazal_motifs
ENSG00000101000	63.2940160283793	700.897198836935	3.46630847402662	4.46813685267096e-13	7.79684210566651e-12	PROCR	chr20	+	35172073	35216240	1696	protein_coding	protein_C_receptor
ENSG00000070404	182.556751651023	1818.17854637766	3.31513118080605	4.77606806160906e-13	8.32889332671596e-12	FSTL3	chr19	+	676365	683399	3067	protein_coding	follistatin-like_3_(secreted_glycoprotein)
ENSG00000116741	7.33214453489527	161.332051031016	4.43502867839589	4.87461007761073e-13	8.49535182156989e-12	RGS2	chr1	+	192809039	192812283	2096	protein_coding	regulator_of_G-protein_signaling_2
ENSG00000072832	0.9101298099858	93.7501474082334	6.49327315355314	4.98430371946101e-13	8.68102194989849e-12	CRMP1	chr4	-	5748084	5893058	5823	protein_coding	collapsin_response_mediator_protein_1
ENSG00000227070	77.9725102828509	1.38777878078145e-17	-9.29267855984842	5.03537158787773e-13	8.7314362880046e-12	RP11-191G24.1	chr1	+	51518309	51561629	476	antisense	NA
ENSG00000205403	1.38777878078145e-17	79.5797471054497	9.32180335680671	5.03537158787773e-13	8.7314362880046e-12	CFI	chr4	-	109740694	109802179	3875	protein_coding	complement_factor_I
ENSG00000254100	77.9725102828509	1.38777878078145e-17	-9.29267855984842	5.03537158787773e-13	8.7314362880046e-12	RP11-675F6.4	chr8	-	38552248	38559020	537	lincRNA	NA
ENSG00000185477	1.38777878078145e-17	79.5797471054497	9.32180335680671	5.03537158787773e-13	8.7314362880046e-12	GPRIN3	chr4	-	89236386	89308010	15205	protein_coding	GPRIN_family_member_3
ENSG00000248713	1.38777878078145e-17	79.5797471054497	9.32180335680671	5.03537158787773e-13	8.7314362880046e-12	RP11-766F14.2	chr4	-	99636529	99654648	10086	protein_coding	NA
ENSG00000248890	1.38777878078145e-17	79.5797471054497	9.32180335680671	5.03537158787773e-13	8.7314362880046e-12	HHIP-AS1	chr4	-	144642922	144661357	1557	antisense	HHIP_antisense_RNA_1
ENSG00000164823	1830.2169627792	183.132664078802	-3.3202357591386	5.03547432921541e-13	8.7314362880046e-12	OSGIN2	chr8	+	89901859	89927888	4681	protein_coding	oxidative_stress_induced_growth_inhibitor_family_member_2
ENSG00000204580	11965.7124213293	1270.98319419858	-3.23477248448201	5.06853749124366e-13	8.78322933501523e-12	DDR1	chr6	+	30876421	30900156	9122	protein_coding	discoidin_domain_receptor_tyrosine_kinase_1
ENSG00000126562	9.16697626675744	180.95260278734	4.2833884443994	5.10948668121418e-13	8.84861418262413e-12	WNK4	chr17	+	42780678	42796936	5089	protein_coding	WNK_lysine_deficient_protein_kinase_4
ENSG00000112139	10.0843900675811	190.762878578702	4.22376319968518	5.13952180465068e-13	8.89502763685955e-12	MDGA1	chr6	-	37630679	37699306	14187	protein_coding	MAM_domain_containing_glycosylphosphatidylinositol_anchor_1
ENSG00000135299	33.9370143556858	413.129123138053	3.60048932335844	5.14968949505348e-13	8.90701954738778e-12	ANKRD6	chr6	+	89433170	89633834	8329	protein_coding	ankyrin_repeat_domain_6
ENSG00000128578	24.7629422886952	327.016705802596	3.71598240647277	5.22676475336144e-13	9.03464849039554e-12	STRIP2	chr7	+	129434433	129488399	5876	protein_coding	striatin_interacting_protein_2
ENSG00000120690	4543.90229713927	475.260866983351	-3.2568269009825	5.52308967288765e-13	9.5408598677188e-12	ELF1	chr13	-	40931920	41061440	4443	protein_coding	E74-like_factor_1_(ets_domain_transcription_factor)
ENSG00000167216	137.603879276325	4.36767330927077	-4.94075673476834	5.57638607526217e-13	9.62687968962869e-12	KATNAL2	chr18	+	46917492	47102243	4783	protein_coding	katanin_p60_subunit_A-like_2
ENSG00000091409	274.297302578343	2659.68215522762	3.27681368056162	5.64725938695072e-13	9.74311671270589e-12	ITGA6	chr2	+	172427354	172506282	6533	protein_coding	integrin_subunit_alpha_6
ENSG00000184867	144.025718364465	1438.84790387887	3.31931667277564	5.69243854762087e-13	9.81490611273489e-12	ARMCX2	chrX	-	101655281	101659891	3589	protein_coding	armadillo_repeat_containing_X-linked_2
ENSG00000061918	3.66244545564338	116.64079295852	4.94359517788777	5.7591295637543e-13	9.92367306596535e-12	GUCY1B3	chr4	+	155758992	155807591	3724	protein_coding	guanylate_cyclase_1_soluble_beta_3
ENSG00000151474	399.064447919459	31.6183847293665	-3.6529309232317	5.82515250227618e-13	1.00311533478458e-11	FRMD4A	chr10	-	13643706	14462142	13328	protein_coding	FERM_domain_containing_4A
ENSG00000066923	94.4858140547332	981.035059114411	3.37430086517139	5.8296625498183e-13	1.00326376584827e-11	STAG3	chr7	+	100177563	100221488	8583	protein_coding	stromal_antigen_3
ENSG00000181982	708.230089508298	64.3193151488545	-3.45853941566053	5.90383628997016e-13	1.0153933821793e-11	CCDC149	chr4	-	24806117	24980204	9582	protein_coding	coiled-coil_domain_containing_149
ENSG00000117122	51.3677371113988	578.813773056278	3.49076773664974	5.93337230846257e-13	1.01983544909393e-11	MFAP2	chr1	-	16974502	16980835	2915	protein_coding	microfibrillar_associated_protein_2
ENSG00000165092	0.9101298099858	92.6601166374037	6.47642185335126	6.02774925770577e-13	1.033473393617e-11	ALDH1A1	chr9	-	72900662	73080442	2849	protein_coding	aldehyde_dehydrogenase_1_family_member_A1
ENSG00000151136	91.7335968807502	1.09771269193672	-6.24100196677959	6.02774925770577e-13	1.033473393617e-11	BTBD11	chr12	+	107318413	107659642	7924	protein_coding	BTB_(POZ)_domain_containing_11
ENSG00000157873	0.9101298099858	92.6601166374037	6.47642185335126	6.02774925770577e-13	1.033473393617e-11	TNFRSF14	chr1	+	2555639	2565382	6219	protein_coding	tumor_necrosis_factor_receptor_superfamily_member_14
ENSG00000173093	90.8161911466337	1.09771269193672	-6.22652215241021	6.02774925770577e-13	1.033473393617e-11	CCDC63	chr12	+	110846769	110907535	2184	protein_coding	coiled-coil_domain_containing_63
ENSG00000113594	65.1288279528006	708.527412940215	3.44078382983839	6.07282776941128e-13	1.04055349835875e-11	LIFR	chr5	-	38474963	38608354	11864	protein_coding	leukemia_inhibitory_factor_receptor_alpha
ENSG00000169594	37.6066413200733	446.9200715691	3.56629847584723	6.12416147501887e-13	1.04869591982873e-11	BNC1	chr15	-	83255903	83284716	4797	protein_coding	basonuclin_1
ENSG00000179915	1.38777878078145e-17	78.4897162846543	9.30193511022247	6.25754915775107e-13	1.07087031354892e-11	NRXN1	chr2	-	49918505	51225564	21199	protein_coding	neurexin_1
ENSG00000138600	3866.85707187667	405.498908967026	-3.25302432564284	6.27744986704512e-13	1.07360789050751e-11	SPPL2A	chr15	-	50702266	50765808	8144	protein_coding	signal_peptide_peptidase_like_2A
ENSG00000164128	658.690194636232	58.8691605930386	-3.48143888099119	6.32884328429505e-13	1.08172479279924e-11	NPY1R	chr4	-	163323961	163344832	4180	protein_coding	neuropeptide_Y_receptor_Y1
ENSG00000188211	63.2940160283793	687.816831800883	3.43913461581191	6.50164538609097e-13	1.11056987430365e-11	NCR3LG1	chr11	+	17351726	17377341	6438	protein_coding	natural_killer_cell_cytotoxicity_receptor_3_ligand_1
ENSG00000214425	6.41472570341761	148.251683034498	4.50234664210407	6.74960880546892e-13	1.15220975641962e-11	LRRC37A4P	chr17	-	45506741	45550335	6491	transcribed_unprocessed_pseudogene	leucine-rich_repeat_containing_37_member_A4_pseudogene
ENSG00000181444	600.89365054767	53.4190058528579	-3.48884305420578	6.78408565446845e-13	1.15737679642393e-11	ZNF467	chr7	-	149764182	149773479	2734	protein_coding	zinc_finger_protein_467
ENSG00000259881	89.8987854075796	1.09771269193672	-6.21189553466261	7.30023438017052e-13	1.24311916835337e-11	RP11-830F9.5	chr16	+	88881038	88887136	3057	antisense	NA
ENSG00000173557	1.82754864465077	91.5700858632852	5.54827338487597	7.30023438017052e-13	1.24311916835337e-11	C2orf70	chr2	+	26562582	26579532	2507	protein_coding	chromosome_2_open_reading_frame_70
ENSG00000256008	0.9101298099858	91.5700858632852	6.4593713941422	7.30023438017052e-13	1.24311916835337e-11	RP11-728G15.1	chr12	-	120629611	120641591	1119	antisense	NA
ENSG00000184451	11.9192148715908	197.303062412522	4.03406690751051	7.54209650043804e-13	1.28350987536229e-11	CCR10	chr17	-	42678889	42683917	2619	protein_coding	chemokine_(C-C_motif)_receptor_10
ENSG00000088992	16.5062667383555	245.264410019381	3.88248636775737	7.68267689774113e-13	1.30662521561397e-11	TESC	chr12	-	117038923	117099479	1926	protein_coding	tescalcin
ENSG00000261742	1.38777878078145e-17	77.3996854592757	9.28178942042567	7.79126218661156e-13	1.32345584554666e-11	LINC00922	chr16	-	65284499	65576300	2089	lincRNA	long_intergenic_non-protein_coding_RNA_922
ENSG00000182901	1.38777878078145e-17	77.3996854592757	9.28178942042567	7.79126218661156e-13	1.32345584554666e-11	RGS7	chr1	-	240775514	241357230	2578	protein_coding	regulator_of_G-protein_signaling_7
ENSG00000090339	199.070051166599	1920.64142105098	3.26937551360086	7.81107431100873e-13	1.32600218905587e-11	ICAM1	chr19	+	10270835	10286615	3706	protein_coding	intercellular_adhesion_molecule_1
ENSG00000228696	3.66244545564338	114.460731522431	4.91640301964955	7.8912586580497e-13	1.33878781218399e-11	ARL17B	chr17	-	46274784	46361797	4219	protein_coding	ADP_ribosylation_factor_like_GTPase_17B
ENSG00000120549	1440.3196442831	144.981591011463	-3.31141513852614	8.04515356200071e-13	1.36405529043515e-11	KIAA1217	chr10	+	23694746	24547848	10442	protein_coding	KIAA1217
ENSG00000150687	15969.2698231219	1739.69634449434	-3.1983057845351	8.2151494646512e-13	1.39201987324321e-11	PRSS23	chr11	+	86791059	86952910	11725	protein_coding	protease_serine_23
ENSG00000062725	13295.9503298124	1447.56814853614	-3.19918138592567	8.25654108383072e-13	1.39817202183762e-11	APPBP2	chr17	-	60443149	60526219	9876	protein_coding	amyloid_beta_precursor_protein_(cytoplasmic_tail)_binding_protein_2
ENSG00000231551	194.483023544591	10.9078032090939	-4.141789166673	8.31214849143983e-13	1.40672243484976e-11	RP11-495P10.1	chr1	+	148402516	148432545	3245	lincRNA	NA
ENSG00000141232	11388.6643906818	1239.37230730386	-3.19979748564899	8.32835562661655e-13	1.40859845072314e-11	TOB1	chr17	-	50862223	50867978	2521	protein_coding	transducer_of_ERBB2_1
ENSG00000226067	493.557211237056	42.5186957319358	-3.53346668912558	8.50485932699023e-13	1.43756691058118e-11	LINC00623	chr1	+	120913275	121009291	2075	lincRNA	long_intergenic_non-protein_coding_RNA_623
ENSG00000165259	1.82754864465077	90.4800550857957	5.53101900273388	8.85439815639812e-13	1.4957297524515e-11	HDX	chrX	-	84317874	84502479	7258	protein_coding	highly_divergent_homeobox
ENSG00000149380	2.74500333963777	102.470393465569	5.15626837749772	8.87413050566902e-13	1.49722369960984e-11	P4HA3	chr11	-	74235801	74311657	4009	protein_coding	prolyl_4-hydroxylase_alpha_polypeptide_III
ENSG00000164532	2.74500333963777	102.470393465569	5.15626837749772	8.87413050566902e-13	1.49722369960984e-11	TBX20	chr7	-	35202430	35254147	1875	protein_coding	T-box_20
ENSG00000159263	59.6243920261802	639.85548597987	3.42085702152886	9.07981710988636e-13	1.5309874331023e-11	SIM2	chr21	+	36699133	36749917	7652	protein_coding	single-minded_family_bHLH_transcription_factor_2
ENSG00000104888	13.7540369826991	213.653521914944	3.94439961092894	9.36101913705788e-13	1.57743497112885e-11	SLC17A7	chr19	-	49429401	49442360	6013	protein_coding	solute_carrier_family_17_(vesicular_glutamate_transporter)_member_7
ENSG00000180773	105.494682377618	1058.42723053949	3.32504240548581	9.40570937979598e-13	1.5839951846526e-11	SLC36A4	chr11	-	93144171	93197964	9685	protein_coding	solute_carrier_family_36_(proton/amino_acid_symporter)_member_4
ENSG00000129159	5.49730390528178	135.171314876056	4.58702269568104	9.59355325793178e-13	1.61464080872939e-11	KCNC1	chr11	+	17734812	17783055	9842	protein_coding	potassium_channel_voltage_gated_Shaw_related_subfamily_C_member_1
ENSG00000198576	16.5062667383555	241.994318160145	3.86313093748382	9.74743164283361e-13	1.63953588752029e-11	ARC	chr8	-	142611044	142614472	2991	protein_coding	activity-regulated_cytoskeleton-associated_protein
ENSG00000189127	6.41472570341761	144.981591011463	4.47019355103101	9.89448970613178e-13	1.6632540428382e-11	ANKRD34B	chr5	-	80556755	80570488	4024	protein_coding	ankyrin_repeat_domain_34B
ENSG00000279662	342.185308441633	26.1682290913477	-3.70300546773877	1.00551617704989e-12	1.68923032284966e-11	RP11-609N14.4	chr16	-	10445309	10449747	4439	TEC	NA
ENSG00000037280	88.9813796634552	900.372795905966	3.33700428272523	1.01116468129999e-12	1.69768253360384e-11	FLT4	chr5	-	180601506	180649624	8852	protein_coding	fms-related_tyrosine_kinase_4
ENSG00000117480	543.097106359838	47.9688509055297	-3.4978740437867	1.02805070099893e-12	1.72498000782011e-11	FAAH	chr1	+	46394265	46413848	2776	protein_coding	fatty_acid_amide_hydrolase
ENSG00000170190	18.3410849555724	259.434808045462	3.81256013724139	1.03546243178319e-12	1.73635684978473e-11	SLC16A5	chr17	+	75087727	75106162	3089	protein_coding	solute_carrier_family_16_(monocarboxylate_transporter)_member_5
ENSG00000125430	30.2673864777484	370.617929848184	3.60829623739178	1.04081533484064e-12	1.74426950173385e-11	HS3ST3B1	chr17	+	14301083	14349404	5367	protein_coding	heparan_sulfate-glucosamine_3-sulfotransferase_3B1
ENSG00000203499	2840.28036841191	301.946001879237	-3.23317869658877	1.04659787854001e-12	1.75289209852185e-11	FAM83H-AS1	chr8	+	143734140	143746337	3229	lincRNA	FAM83H_antisense_RNA_1_(head_to_head)
ENSG00000124191	14.6714472879947	222.373766940926	3.9097816712542	1.06890921328282e-12	1.78917055839872e-11	TOX2	chr20	+	43914864	44069616	3223	protein_coding	TOX_high_mobility_group_box_family_member_2
ENSG00000119714	304.571683689873	22.8981358637006	-3.72674682514221	1.07067249529786e-12	1.79103189131305e-11	GPR68	chr14	-	91232532	91253925	3278	protein_coding	G_protein-coupled_receptor_68
ENSG00000069431	0.9101298099858	89.3900243048503	6.42465376999675	1.07555296698286e-12	1.79700985085028e-11	ABCC9	chr12	-	21797401	21941402	11421	protein_coding	ATP_binding_cassette_subfamily_C_member_9
ENSG00000172733	0.9101298099858	89.3900243048503	6.42465376999675	1.07555296698286e-12	1.79700985085028e-11	PURG	chr8	-	30995802	31033715	3771	protein_coding	purine-rich_element_binding_protein_G
ENSG00000171208	265.123247648071	2495.08753745785	3.2337077896138	1.07826397317081e-12	1.80044550857137e-11	NETO2	chr16	-	47077703	47143997	7481	protein_coding	neuropilin_and_tolloid_like_2
ENSG00000140682	38.524047943058	442.559949194333	3.51750619507962	1.10326207977109e-12	1.841068595618e-11	TGFB1I1	chr16	+	31471585	31477960	5403	protein_coding	transforming_growth_factor_beta_1_induced_transcript_1
ENSG00000109654	975.195077938109	95.9302089403432	-3.34406942365973	1.11168912499356e-12	1.85400622355658e-11	TRIM2	chr4	+	153152342	153339320	9425	protein_coding	tripartite_motif_containing_2
ENSG00000148344	80.7247277137018	822.980624408774	3.34763294510924	1.12446036096444e-12	1.87416875072019e-11	PTGES	chr9	-	129738331	129753047	1896	protein_coding	prostaglandin_E_synthase
ENSG00000121690	6.41472570341761	143.891560334784	4.45931461556682	1.12544928340084e-12	1.87468084450675e-11	DEPDC7	chr11	+	33015864	33033582	3326	protein_coding	DEP_domain_containing_7
ENSG00000048392	4967.74361700085	541.752733025427	-3.19661091652451	1.18562167126091e-12	1.97371559209118e-11	RRM2B	chr8	-	102204502	102239118	5548	protein_coding	ribonucleotide_reductase_M2_B_(TP53_inducible)
ENSG00000204118	74.3028869379177	1.38777878078145e-17	-9.22325122112745	1.21497405385279e-12	2.02013309885161e-11	NAP1L6	chrX	-	73126037	73128080	2044	protein_coding	nucleosome_assembly_protein_1-like_6
ENSG00000196932	74.3028869379177	1.38777878078145e-17	-9.22325122112745	1.21497405385279e-12	2.02013309885161e-11	TMEM26	chr10	-	61406643	61453450	6907	protein_coding	transmembrane_protein_26
ENSG00000006016	274.297302578343	19.628043016514	-3.79686606321963	1.2474341111476e-12	2.07285108704956e-11	CRLF1	chr19	-	18572220	18607741	3018	protein_coding	cytokine_receptor-like_factor_1
ENSG00000106003	1210.05087485693	123.180977220546	-3.29500320937123	1.28080454680258e-12	2.12603081094622e-11	LFNG	chr7	+	2512529	2529177	3418	protein_coding	LFNG_O-fucosylpeptide_3-beta-N-acetylglucosaminyltransferase
ENSG00000153291	6.41472570341761	142.801529656901	4.44835302157843	1.28098362013668e-12	2.12603081094622e-11	SLC25A27	chr6	+	46652915	46678193	3288	protein_coding	solute_carrier_family_25_member_27
ENSG00000101333	982.534321596577	8841.24557981954	3.16949600682644	1.28650953635924e-12	2.13391427981998e-11	PLCB4	chr20	+	9068763	9481242	6900	protein_coding	phospholipase_C_beta_4
ENSG00000147573	1.82754864465077	88.2999935203614	5.4958785404557	1.30847429104720e-12	2.16773201675236e-11	TRIM55	chr8	+	66126896	66175487	3081	protein_coding	tripartite_motif_containing_55
ENSG00000168928	87.1465681594408	1.09771269193672	-6.16710431801313	1.30847429104720e-12	2.16773201675236e-11	CTRB2	chr16	-	75204096	75207185	2346	protein_coding	chymotrypsinogen_B2
ENSG00000137474	48.6155184584408	528.672365946727	3.43930706112054	1.32777217337081e-12	2.19837823840281e-11	MYO7A	chr11	+	77128264	77215239	10145	protein_coding	myosin_VIIA
ENSG00000081181	30.2673864777484	366.257807451708	3.59122849341312	1.35761134311261e-12	2.24643017731287e-11	ARG2	chr14	+	67619798	67651720	2418	protein_coding	arginase_2
ENSG00000278041	1.38777878078145e-17	75.2196237942766	9.24063393898362	1.5217856836136e-12	2.51657414822957e-11	RP5-984P4.6	chr20	-	21499261	21502934	3674	lincRNA	NA
ENSG00000177181	86.2291623992603	1.09771269193672	-6.15185946098199	1.594298291444e-12	2.63490368467556e-11	RIMKLA	chr1	+	42380795	42422578	8981	protein_coding	ribosomal_modification_protein_rimK-like_family_member_A
ENSG00000196724	149.530151812021	6.54770241941083	-4.48901618009711	1.62346885967978e-12	2.67989298379674e-11	ZNF418	chr19	-	57921884	57935393	4501	protein_coding	zinc_finger_protein_418
ENSG00000267475	149.530151812021	6.54770241941083	-4.48901618009711	1.62346885967978e-12	2.67989298379674e-11	CTD-2538C1.2	chr19	-	32687089	32691750	568	lincRNA	NA
ENSG00000124313	458.695803482798	40.3386335971558	-3.50353735477823	1.63684469415991e-12	2.70035188566837e-11	IQSEC2	chrX	-	53232876	53321324	6962	protein_coding	IQ_motif_and_Sec7_domain_2
ENSG00000169902	81.6421335103064	816.4404408998	3.31984692301833	1.65602750520496e-12	2.72917954229361e-11	TPST1	chr7	+	66205199	66420543	2871	protein_coding	tyrosylprotein_sulfotransferase_1
ENSG00000161905	422.916990178949	35.9785092207799	-3.55093016549537	1.65630364571762e-12	2.72917954229361e-11	ALOX15	chr17	-	4630902	4642294	3404	protein_coding	arachidonate_15-lipoxygenase
ENSG00000124429	396.312231501528	33.7984469860363	-3.54709994673163	1.66937764882582e-12	2.74907513295562e-11	POF1B	chrX	-	85277396	85379743	4029	protein_coding	premature_ovarian_failure_1B
ENSG00000171346	167.87826298939	8.72774907734345	-4.24757449780239	1.67397267507009e-12	2.75499237205881e-11	KRT15	chr17	-	41513743	41522529	7069	protein_coding	keratin_15_type_I
ENSG00000109107	242.188110201064	16.3579510360724	-3.87856097175198	1.73542523635844e-12	2.85442161633334e-11	ALDOC	chr17	-	28573115	28577264	2928	protein_coding	aldolase_fructose-bisphosphate_C
ENSG00000068831	10.0843900675811	178.772541493165	4.13016722482647	1.76242734986436e-12	2.89710188575133e-11	RASGRP2	chr11	-	64726911	64745456	6084	protein_coding	RAS_guanyl_releasing_protein_2_(calcium_and_DAG-regulated)
ENSG00000167741	108.246899377709	2.18769296388965	-5.55541798495245	1.76513294641285e-12	2.89981607881122e-11	GGT6	chr17	-	4556927	4560818	3161	protein_coding	gamma-glutamyltransferase_6
ENSG00000160469	25.6803498996692	316.116399759054	3.61488210538635	1.79153826535602e-12	2.94143843794363e-11	BRSK1	chr19	+	55282072	55312533	3841	protein_coding	BR_serine/threonine_kinase_1
ENSG00000035115	2384.32985749134	259.434808045462	-3.19956889269675	1.83265978697273e-12	3.00715852037811e-11	SH3YL1	chr2	-	217730	266398	11165	protein_coding	SH3_and_SYLF_domain_containing_1
ENSG00000101265	43.111080472052	476.350897575505	3.46185407336068	1.84046374616656e-12	3.01816299840946e-11	RASSF2	chr20	-	4780023	4823645	5759	protein_coding	Ras_association_(RalGDS/AF-6)_domain_family_member_2
ENSG00000105339	177.052318427913	1645.95371445927	3.21570779009453	1.87150764428083e-12	3.06724265347837e-11	DENND3	chr8	+	141117278	141195808	14670	protein_coding	DENN/MADD_domain_containing_3
ENSG00000196482	1.38777878078145e-17	74.1295929543996	9.21960739479525	1.90999631718850e-12	3.11731802486653e-11	ESRRG	chr1	-	216503246	217137755	10912	protein_coding	estrogen-related_receptor_gamma
ENSG00000248370	1.38777878078145e-17	74.1295929543996	9.21960739479525	1.90999631718850e-12	3.11731802486653e-11	RP11-366H4.1	chr4	+	188160065	188161139	677	lincRNA	NA
ENSG00000116157	1.38777878078145e-17	74.1295929543996	9.21960739479525	1.90999631718850e-12	3.11731802486653e-11	GPX7	chr1	+	52602372	52609051	1691	protein_coding	glutathione_peroxidase_7
ENSG00000141750	1.38777878078145e-17	74.1295929543996	9.21960739479525	1.90999631718850e-12	3.11731802486653e-11	STAC2	chr17	-	39210536	39225872	3362	protein_coding	SH3_and_cysteine_rich_domain_2
ENSG00000273982	72.4680752166658	1.38777878078145e-17	-9.18724307370242	1.90999631718850e-12	3.11731802486653e-11	RP11-332H18.7	chr17	-	61354763	61355155	393	antisense	NA
ENSG00000005108	1.38777878078145e-17	74.1295929543996	9.21960739479525	1.90999631718850e-12	3.11731802486653e-11	THSD7A	chr7	-	11370357	11832198	10929	protein_coding	thrombospondin_type_1_domain_containing_7A
ENSG00000128714	1.38777878078145e-17	74.1295929543996	9.21960739479525	1.90999631718850e-12	3.11731802486653e-11	HOXD13	chr2	+	176092891	176095938	2240	protein_coding	homeobox_D13
ENSG00000172890	2939.36015749594	323.746613991063	-3.18210834075267	1.92655042633654e-12	3.14247113135713e-11	NADSYN1	chr11	+	71453109	71524107	16263	protein_coding	NAD_synthetase_1
ENSG00000177606	335.763470086567	3033.56264457319	3.17498680660503	1.97032281137374e-12	3.21196488651981e-11	JUN	chr1	-	58780788	58784327	3540	protein_coding	jun_proto-oncogene
ENSG00000139679	107.329493714215	2.18769296388965	-5.54315382427123	2.07998862002709e-12	3.38873027484391e-11	LPAR6	chr13	-	48389567	48444704	4348	protein_coding	lysophosphatidic_acid_receptor_6
ENSG00000079215	2.74500333963777	98.110270460225	5.09361045886964	2.15444429213079e-12	3.50795574173409e-11	SLC1A3	chr5	+	36606355	36688334	6265	protein_coding	solute_carrier_family_1_(glial_high_affinity_glutamate_transporter)_member_3
ENSG00000160211	10500.6159110812	1199.04117574474	-3.13039813556775	2.21032342284564e-12	3.59681091430047e-11	G6PD	chrX	-	154531391	154547572	3709	protein_coding	glucose-6-phosphate_dehydrogenase
ENSG00000177875	5.49730390528178	128.631130723838	4.51553696074217	2.2138681882676e-12	3.6004487903931e-11	CCDC184	chr12	+	48183584	48185926	2343	protein_coding	coiled-coil_domain_containing_184
ENSG00000154127	108.246899377709	1037.71664945655	3.25942631857535	2.28725040610385e-12	3.71759299162305e-11	UBASH3B	chr11	+	122655675	122814473	9011	protein_coding	ubiquitin_associated_and_SH3_domain_containing_B
ENSG00000064042	307.323900144081	2766.50515218676	3.1696767401727	2.30625265945474e-12	3.74626428751712e-11	LIMCH1	chr4	+	41359607	41700044	10862	protein_coding	LIM_and_calponin_homology_domains_1
ENSG00000255346	145.860529519153	6.54770241941083	-4.45320118210662	2.35581220175254e-12	3.82450952540712e-11	NOX5	chr15	+	68930525	69062743	12511	protein_coding	NADPH_oxidase_EF-hand_calcium_binding_domain_5
ENSG00000250337	15.5888571884922	222.373766940926	3.82303296603247	2.37066012848726e-12	3.84407571895803e-11	LINC01021	chr5	+	27472292	27496401	2638	lincRNA	long_intergenic_non-protein_coding_RNA_1021
ENSG00000170498	15.5888571884922	222.373766940926	3.82303296603247	2.37066012848726e-12	3.84407571895803e-11	KISS1	chr1	-	204190341	204196486	709	protein_coding	KiSS-1_metastasis-suppressor
ENSG00000149557	255.949192691476	18.5380122243038	-3.77895963146775	2.37311419283618e-12	3.84578747302226e-11	FEZ1	chr11	-	125445745	125496317	5937	protein_coding	fasciculation_and_elongation_protein_zeta_1
ENSG00000112964	1.82754864465077	86.1199319403898	5.45986072944252	2.37812129400631e-12	3.85163213819008e-11	GHR	chr5	+	42423777	42721878	6610	protein_coding	growth_hormone_receptor
ENSG00000237862	1.38777878078145e-17	73.0395621094273	9.19826986135669	2.40226340924739e-12	3.86569022924006e-11	RP1-63G5.7	chr22	-	37352190	37354839	1965	sense_intronic	NA
ENSG00000135374	71.5506693429158	1.38777878078145e-17	-9.16889627214804	2.40226340924739e-12	3.86569022924006e-11	ELF5	chr11	-	34478793	34513805	4494	protein_coding	E74-like_factor_5_(ets_domain_transcription_factor)
ENSG00000128709	1.38777878078145e-17	73.0395621094273	9.19826986135669	2.40226340924739e-12	3.86569022924006e-11	HOXD9	chr2	+	176122720	176124937	1870	protein_coding	homeobox_D9
ENSG00000231574	71.5506693429158	1.38777878078145e-17	-9.16889627214804	2.40226340924739e-12	3.86569022924006e-11	KCCAT211	chr3	+	177816865	177899224	3005	lincRNA	renal_clear_cell_carcinoma-associated_transcript_211
ENSG00000271347	1.38777878078145e-17	73.0395621094273	9.19826986135669	2.40226340924739e-12	3.86569022924006e-11	RP11-701H24.7	chr15	+	24991486	24991753	268	sense_intronic	NA
ENSG00000197291	1.38777878078145e-17	73.0395621094273	9.19826986135669	2.40226340924739e-12	3.86569022924006e-11	RAMP2-AS1	chr17	-	42753914	42761257	4168	lincRNA	RAMP2_antisense_RNA_1
ENSG00000274290	71.5506693429158	1.38777878078145e-17	-9.16889627214804	2.40226340924739e-12	3.86569022924006e-11	HIST1H2BE	chr6	+	26172059	26184655	2585	protein_coding	histone_cluster_1_H2be
ENSG00000257084	71.5506693429158	1.38777878078145e-17	-9.16889627214804	2.40226340924739e-12	3.86569022924006e-11	U47924.27	chr12	+	6963246	6964447	350	lincRNA	NA
ENSG00000259863	1.38777878078145e-17	73.0395621094273	9.19826986135669	2.40226340924739e-12	3.86569022924006e-11	SH3RF3-AS1	chr2	-	109127327	109128930	1604	lincRNA	SH3RF3_antisense_RNA_1
ENSG00000253154	71.5506693429158	1.38777878078145e-17	-9.16889627214804	2.40226340924739e-12	3.86569022924006e-11	CTA-392E5.1	chr8	+	85839705	85951083	813	lincRNA	NA
ENSG00000123685	1.38777878078145e-17	73.0395621094273	9.19826986135669	2.40226340924739e-12	3.86569022924006e-11	BATF3	chr1	-	212686418	212699985	2713	protein_coding	basic_leucine_zipper_transcription_factor_ATF-like_3
ENSG00000196878	305.489089174784	2742.52447940027	3.16575256958802	2.42011733125253e-12	3.89214308343718e-11	LAMB3	chr1	-	209614870	209652466	4688	protein_coding	laminin_subunit_beta_3
ENSG00000233029	106.412088047543	2.18769296388965	-5.53078451306462	2.45363798208035e-12	3.94374623876048e-11	RP11-439A17.9	chr1	-	121090289	121097655	3543	antisense	NA
ENSG00000164050	1888.93091189968	206.023307494139	-3.19597173411966	2.48890653620161e-12	3.99809688388321e-11	PLXNB1	chr3	-	48403854	48430051	9733	protein_coding	plexin_B1
ENSG00000163513	128.429823294625	1205.58135924111	3.22934068629669	2.52660071936487e-12	4.0562782477089e-11	TGFBR2	chr3	+	30606502	30694142	4704	protein_coding	transforming_growth_factor_beta_receptor_II
ENSG00000115221	264.205842153639	19.628043016514	-3.74281439619916	2.54063133914346e-12	4.07642371398975e-11	ITGB6	chr2	-	160099666	160271888	6357	protein_coding	integrin_subunit_beta_6
ENSG00000273274	2.74500333963777	97.0202397017759	5.07751134519789	2.58245249505436e-12	4.14110939163206e-11	ZBTB8B	chr1	+	32465069	32496686	12834	protein_coding	zinc_finger_and_BTB_domain_containing_8B
ENSG00000137309	4273.26768813009	36934.6037398823	3.11152169111949	2.61295608004806e-12	4.18758188562948e-11	HMGA1	chr6	+	34236873	34246231	2327	protein_coding	high_mobility_group_AT-hook_1
ENSG00000242265	776.118093521046	6789.80802660059	3.12880320995285	2.67244344199762e-12	4.28042324393573e-11	PEG10	chr7	+	94656325	94669695	6689	protein_coding	paternally_expressed_10
ENSG00000130518	236.683677184138	16.3579510360724	-3.84541135083468	2.79386700023588e-12	4.47230130229843e-11	KIAA1683	chr19	-	18257097	18274509	9154	protein_coding	KIAA1683
ENSG00000113209	16.5062667383555	228.913950693586	3.78300299343143	2.80756357450489e-12	4.49161174301681e-11	PCDHB5	chr5	+	141135218	141138625	3408	protein_coding	protocadherin_beta_5
ENSG00000108423	1894.43534462954	208.203368759554	-3.18499213220705	2.83123963697011e-12	4.52685588699505e-11	TUBD1	chr17	-	59859482	59892945	3330	protein_coding	tubulin_delta_1
ENSG00000181126	3.66244545564338	106.83051642847	4.81697934858303	2.89755727967589e-12	4.63019888136935e-11	HLA-V	chr6	+	29790954	29797811	5662	transcribed_unprocessed_pseudogene	major_histocompatibility_complex_class_I_V_(pseudogene)
ENSG00000248323	1.82754864465077	85.0299011447181	5.44150891055316	2.91149468644706e-12	4.64976860464464e-11	LUCAT1	chr5	-	91303029	91314402	2904	lincRNA	lung_cancer_associated_transcript_1_(non-protein_coding)
ENSG00000171847	20.1759022113556	263.794930505762	3.69997511777747	2.936088954162e-12	4.6863251496465e-11	FAM90A1	chr12	-	8221260	8227618	2538	protein_coding	family_with_sequence_similarity_90_member_A1
ENSG00000115526	77.0551044581921	748.85854461675	3.27849639199042	2.98821018924858e-12	4.7667499080351e-11	CHST10	chr2	-	100391860	100417656	4487	protein_coding	carbohydrate_sulfotransferase_10
ENSG00000222014	70.633263460031	1.38777878078145e-17	-9.15031314511367	3.02785283873892e-12	4.82439055145766e-11	RAB6C	chr2	+	129979664	129982738	3075	protein_coding	RAB6C_member_RAS_oncogene_family
ENSG00000101307	1.38777878078145e-17	71.9495312592222	9.17661200113097	3.02785283873892e-12	4.82439055145766e-11	SIRPB1	chr20	-	1563521	1620061	6091	protein_coding	signal-regulatory_protein_beta_1
ENSG00000160161	56.8721738742947	575.543681290247	3.3360918423482	3.05982964946754e-12	4.87251738216601e-11	CILP2	chr19	+	19538248	19546659	4360	protein_coding	cartilage_intermediate_layer_protein_2
ENSG00000165410	292.645412369329	2597.55041209693	3.14934320817307	3.09712302079443e-12	4.92904977979557e-11	CFL2	chr14	-	34706769	34714823	7179	protein_coding	cofilin_2_(muscle)
ENSG00000141424	9139.18621713847	1060.60729170601	-3.10703674595266	3.1091389078495e-12	4.94531111074432e-11	SLC39A6	chr18	-	36108532	36129385	3682	protein_coding	solute_carrier_family_39_(zinc_transporter)_member_6
ENSG00000065361	8396.08779927895	974.494875612384	-3.10684013278189	3.15673111028156e-12	5.01810764530943e-11	ERBB3	chr12	+	56079857	56103505	8658	protein_coding	erb-b2_receptor_tyrosine_kinase_3
ENSG00000180264	8.2495612111708	154.791867050879	4.20812161209326	3.17534662430287e-12	5.04478379635779e-11	ADGRD2	chr9	+	124451600	124478589	5546	protein_coding	adhesion_G_protein-coupled_receptor_D2
ENSG00000133083	6.41472570341761	136.261345563027	4.3807746462454	3.23069164943039e-12	5.12974890594602e-11	DCLK1	chr13	-	35768652	36131306	14375	protein_coding	doublecortin_like_kinase_1
ENSG00000272031	277.966924543635	21.808104855422	-3.66493686530918	3.28736495727893e-12	5.21672381362538e-11	ANKRD34A	chr1	-	145959442	145964582	3677	protein_coding	ankyrin_repeat_domain_34A
ENSG00000160111	408.238502640679	35.9785092207799	-3.49998402096756	3.33937339011814e-12	5.29619997702647e-11	CPAMD8	chr19	-	16892947	17026815	10199	protein_coding	C3_and_PZP-like_alpha-2-macroglobulin_domain_containing_8
ENSG00000167191	52.2851432859345	538.482641256223	3.36111627741725	3.35172730840195e-12	5.31272926272979e-11	GPRC5B	chr16	-	19856691	19886167	6667	protein_coding	G_protein-coupled_receptor_class_C_group_5_member_B
ENSG00000187800	11.9192148715908	182.042633433405	3.9180016053593	3.37562873688142e-12	5.34753259752165e-11	PEAR1	chr1	+	156893698	156916434	5530	protein_coding	platelet_endothelial_aggregation_receptor_1
ENSG00000267750	104.577276704366	2.18769296388965	-5.50572311674117	3.42556122051393e-12	5.42038890249445e-11	RUNDC3A-AS1	chr17	-	44299574	44315315	5403	antisense	RUNDC3A_antisense_RNA_1
ENSG00000155961	104.577276704366	2.18769296388965	-5.50572311674117	3.42556122051393e-12	5.42038890249445e-11	RAB39B	chrX	-	155258241	155264589	3505	protein_coding	RAB39B_member_RAS_oncogene_family
ENSG00000088899	59.6243920261802	598.434323647304	3.32432209952929	3.46971413375392e-12	5.48709651479968e-11	RP5-1187M17.10	chr20	-	3162617	3173592	5395	protein_coding	Leucine_zipper_putative_tumor_suppressor_3_
ENSG00000196083	81.6421335103064	785.919584519491	3.26488900871194	3.47274386008795e-12	5.48873154576314e-11	IL1RAP	chr3	+	190514051	190659750	11558	protein_coding	interleukin_1_receptor_accessory_protein
ENSG00000106078	2027.45913559266	226.73388944422	-3.15995009952125	3.50156258148786e-12	5.53110123799527e-11	COBL	chr7	-	51016212	51316818	14349	protein_coding	cordon-bleu_WH2_repeat_protein
ENSG00000132357	1.82754864465077	83.9398703451251	5.42292063607464	3.57036770063855e-12	5.62894944172706e-11	CARD6	chr5	+	40841184	40860175	4399	protein_coding	caspase_recruitment_domain_family_member_6
ENSG00000185710	82.5595393003994	1.09771269193672	-6.08921616704065	3.57036770063855e-12	5.62894944172706e-11	SMG1P4	chr16	-	21879338	21919156	6290	transcribed_unprocessed_pseudogene	SMG1_pseudogene_4
ENSG00000205018	82.5595393003994	1.09771269193672	-6.08921616704065	3.57036770063855e-12	5.62894944172706e-11	RP11-830F9.6	chr16	+	88939789	88951524	1812	antisense	NA
ENSG00000238083	48.6155184584408	502.511631773235	3.36610675325091	3.57169440231763e-12	5.62894944172706e-11	LRRC37A2	chr17	+	46511511	46555650	6756	protein_coding	leucine-rich_repeat_containing_37_member_A2
ENSG00000103145	412.825529998395	3599.28851616003	3.12369520714529	3.57578225252845e-12	5.63216424552032e-11	HCFC1R1	chr16	-	3022620	3024286	1433	protein_coding	host_cell_factor_C1_regulator_1_(XPO1_dependent)
ENSG00000003436	6.41472570341761	135.171314876056	4.36919729636217	3.69743405684447e-12	5.82044270161875e-11	TFPI	chr2	-	187464230	187565760	11714	protein_coding	tissue_factor_pathway_inhibitor
ENSG00000277147	559.610404711093	54.5090368167509	-3.35710021944391	3.81817744082279e-12	6.00353142885062e-11	LINC00869	chr1	+	149606334	149679523	8501	lincRNA	long_intergenic_non-protein_coding_RNA_869
ENSG00000198429	69.715857567707	1.38777878078145e-17	-9.13148752484043	3.82465621735438e-12	6.00353142885062e-11	ZNF69	chr19	+	11887784	11914329	2931	protein_coding	zinc_finger_protein_69
ENSG00000110852	1.38777878078145e-17	70.8595004036422	9.15462404962005	3.82465621735438e-12	6.00353142885062e-11	CLEC2B	chr12	-	9852984	9870136	2638	protein_coding	C-type_lectin_domain_family_2_member_B
ENSG00000106511	1.38777878078145e-17	70.8595004036422	9.15462404962005	3.82465621735438e-12	6.00353142885062e-11	MEOX2	chr7	-	15611212	15686812	2500	protein_coding	mesenchyme_homeobox_2
ENSG00000170162	1.38777878078145e-17	70.8595004036422	9.15462404962005	3.82465621735438e-12	6.00353142885062e-11	VGLL2	chr6	+	117265558	117273565	2231	protein_coding	vestigial_like_family_member_2
ENSG00000138646	61.4592040541119	611.514690703347	3.31187867832425	3.83265070133677e-12	6.01264842769324e-11	HERC5	chr4	+	88457117	88506163	4766	protein_coding	HECT_and_RLD_domain_containing_E3_ubiquitin_protein_ligase_5
ENSG00000133477	122.925389613411	4.36767330927077	-4.77818298153324	3.92725122367878e-12	6.15754480629363e-11	FAM83F	chr22	+	39994949	40043529	16389	protein_coding	family_with_sequence_similarity_83_member_F
ENSG00000151376	44.9458932465692	465.450591651714	3.36851429997328	3.99872556204609e-12	6.26603713286778e-11	ME3	chr11	-	86441108	86672636	3838	protein_coding	malic_enzyme_3_NADP(+)-dependent_mitochondrial
ENSG00000142609	3.66244545564338	104.650454952081	4.78726700418222	4.05429976332925e-12	6.34950443002948e-11	CFAP74	chr1	-	1921951	2003837	10422	protein_coding	cilia_and_flagella_associated_protein_74
ENSG00000130962	31.1847935465631	354.267470852796	3.50032869949903	4.17445246459036e-12	6.53395658672166e-11	PRRG1	chrX	+	37349275	37457295	6180	protein_coding	proline_rich_Gla_(G-carboxyglutamic_acid)_1
ENSG00000095303	6.41472570341761	134.081284187685	4.3575262883807	4.23465203572162e-12	6.62169237720726e-11	PTGS1	chr9	+	122370530	122395703	5790	protein_coding	prostaglandin-endoperoxide_synthase_1_(prostaglandin_G/H_synthase_and_cyclooxygenase)
ENSG00000139926	744.008902443043	6357.06588598332	3.09474091848504	4.2353212215947e-12	6.62169237720726e-11	FRMD6	chr14	+	51489100	51730727	9416	protein_coding	FERM_domain_containing_6
ENSG00000113356	45.8632995896368	473.080805798896	3.36290042062555	4.25771266345478e-12	6.65291795214034e-11	POLR3G	chr5	+	90471748	90514553	4019	protein_coding	polymerase_(RNA)_III_(DNA_directed)_polypeptide_G_(32kD)
ENSG00000167705	30.2673864777484	344.457195443644	3.50272285622084	4.27524287249063e-12	6.67651642455223e-11	RILP	chr17	-	1646145	1650077	2103	protein_coding	Rab_interacting_lysosomal_protein
ENSG00000011422	73.3854810815734	708.527412940215	3.2689126126113	4.40935320756626e-12	6.88204441323948e-11	PLAUR	chr19	-	43646095	43670547	4457	protein_coding	plasminogen_activator_urokinase_receptor
ENSG00000197971	722.908576868775	74.1295929543996	-3.28367834490418	4.51567847745258e-12	7.04399737994461e-11	MBP	chr18	-	76978827	77133683	18615	protein_coding	myelin_basic_protein
ENSG00000125531	4.57987785670322	113.370700801306	4.59018624048919	4.76623123337074e-12	7.43061933950843e-11	C20orf195	chr20	+	63547891	63556708	3625	protein_coding	chromosome_20_open_reading_frame_195
ENSG00000177098	3.66244545564338	103.560424210119	4.77217816357242	4.80386481349639e-12	7.48504737880818e-11	SCN4B	chr11	-	118133377	118152888	5649	protein_coding	sodium_channel_voltage_gated_type_IV_beta_subunit
ENSG00000244541	68.7984516656246	1.38777878078145e-17	-9.11241299891877	4.8418520198423e-12	7.53996446192996e-11	LINC01213	chr3	+	150238519	150240209	609	lincRNA	long_intergenic_non-protein_coding_RNA_1213
ENSG00000100209	560.527810174754	55.5990677725305	-3.33095817225043	4.95006673861415e-12	7.70411914989404e-11	HSCB	chr22	+	28742031	28757515	1462	protein_coding	HscB_mitochondrial_iron-sulfur_cluster_co-chaperone
ENSG00000113389	49.5329246986267	502.511631773235	3.33920796171137	4.9632833785938e-12	7.72031992051516e-11	NPR3	chr5	+	32689070	32791724	9866	protein_coding	natriuretic_peptide_receptor_3
ENSG00000140807	18.3410849555724	238.724226298056	3.69258948853973	5.1925016907752e-12	8.07230011294566e-11	NKD1	chr16	+	50548330	50640739	8915	protein_coding	naked_cuticle_homolog_1_(Drosophila)
ENSG00000125864	331.176442686091	28.3482913321216	-3.54089479529015	5.20662601873104e-12	8.08968486673008e-11	BFSP1	chr20	-	17493905	17569220	3226	protein_coding	beaded_filament_structural_protein_1
ENSG00000204335	1.82754864465077	81.7598087337634	5.38500978388109	5.39633076543595e-12	8.37970030379752e-11	SP5	chr2	+	170715351	170718078	2060	protein_coding	Sp5_transcription_factor
ENSG00000157150	2.74500333963777	92.6601166374037	5.01125588958183	5.40262440169665e-12	8.38473892048869e-11	TIMP4	chr3	-	12153051	12159351	1650	protein_coding	TIMP_metallopeptidase_inhibitor_4
ENSG00000112208	102.742465347562	942.883988682683	3.19638160939352	5.48708827484265e-12	8.5110216946671e-11	BAG2	chr6	+	57172326	57189833	6651	protein_coding	BCL2_associated_athanogene_2
ENSG00000167994	51.3677371113988	516.682029453329	3.32698025435344	5.52222345423125e-12	8.56069150027134e-11	RAB3IL1	chr11	-	61897301	61920269	3006	protein_coding	RAB3A_interacting_protein_(rabin3)-like_1
ENSG00000236397	20.1759022113556	255.074685580953	3.65149987480403	5.68802197237077e-12	8.81274885984048e-11	DDX11L2	chr2	-	113599036	113601261	1398	unprocessed_pseudogene	DEAD/H_(Asp-Glu-Ala-Asp/His)_box_helicase_11_like_2
ENSG00000182218	22.0107186986201	262.704899891071	3.56921063406025	5.91722614732208e-12	9.16270474535499e-11	HHIPL1	chr14	+	99645110	99680569	7836	protein_coding	HHIP-like_1
ENSG00000180178	16.5062667383555	220.193705686918	3.72700002646597	5.99653073555798e-12	9.28028090931796e-11	FAR2P1	chr2	-	129990456	130051131	8075	transcribed_unprocessed_pseudogene	fatty_acyl-CoA_reductase_2_pseudogene_1
ENSG00000183287	1.38777878078145e-17	68.6794386757715	9.10961651926326	6.14342514345582e-12	9.48626248569222e-11	CCBE1	chr18	-	59430940	59697380	6577	protein_coding	collagen_and_calcium_binding_EGF_domains_1
ENSG00000136866	1.38777878078145e-17	68.6794386757715	9.10961651926326	6.14342514345582e-12	9.48626248569222e-11	ZFP37	chr9	-	113038380	113056759	6354	protein_coding	ZFP37_zinc_finger_protein
ENSG00000259240	66.9636398308348	1.38777878078145e-17	-9.07349027767246	6.14342514345582e-12	9.48626248569222e-11	RP11-108K3.1	chr15	+	51037488	51293912	561	lincRNA	NA
ENSG00000130592	1.38777878078145e-17	68.6794386757715	9.10961651926326	6.14342514345582e-12	9.48626248569222e-11	LSP1	chr11	+	1852970	1892267	5399	protein_coding	lymphocyte-specific_protein_1
ENSG00000174307	3753.09879554063	442.559949194333	-3.08380662899395	6.25662373288434e-12	9.65563463962134e-11	PHLDA3	chr1	-	201464383	201469237	3138	protein_coding	pleckstrin_homology-like_domain_family_A_member_3
ENSG00000114631	204.574484293637	1774.57732310983	3.11594558852658	6.63211018674288e-12	1.02293697277407e-10	PODXL2	chr3	+	127629181	127672809	2186	protein_coding	podocalyxin-like_2
ENSG00000122733	0.9101298099858	80.669777921781	6.27677212175756	6.65137456259196e-12	1.02361192974729e-10	PHF24	chr9	+	34957608	34982544	5813	protein_coding	PHD_finger_protein_24
ENSG00000152784	1.82754864465077	80.669777921781	5.36567411249133	6.65137456259196e-12	1.02361192974729e-10	PRDM8	chr4	+	80183879	80204329	4588	protein_coding	PR_domain_containing_8
ENSG00000275234	78.8899161001786	1.09771269193672	-6.02372888110296	6.65137456259196e-12	1.02361192974729e-10	CTD-2396E7.11	chr19	+	6469465	6470152	688	antisense	NA
ENSG00000159708	0.9101298099858	80.669777921781	6.27677212175756	6.65137456259196e-12	1.02361192974729e-10	LRRC36	chr16	+	67326798	67385203	4017	protein_coding	leucine_rich_repeat_containing_36
ENSG00000128617	3.66244545564338	101.380362718367	4.7415186338268	6.76766968607637e-12	1.04092664450104e-10	OPN1SW	chr7	-	128772491	128775790	1096	protein_coding	opsin_1_(cone_pigments)_short-wave-sensitive
ENSG00000107551	22.0107186986201	260.524838660924	3.55719382642317	6.83973029771748e-12	1.05142215157925e-10	RASSF4	chr10	+	44959407	44995891	9481	protein_coding	Ras_association_(RalGDS/AF-6)_domain_family_member_4
ENSG00000226419	5.49730390528178	121.000915807254	4.42739777995795	7.05943529434903e-12	1.08458955323962e-10	SLC16A1-AS1	chr1	+	112956415	113047055	10138	antisense	SLC16A1_antisense_RNA_1
ENSG00000155304	735.752253306154	6121.6192805074	3.05639118975923	7.23484626025536e-12	1.11091852039801e-10	HSPA13	chr21	-	14371115	14383484	4194	protein_coding	heat_shock_protein_family_A_(Hsp70)_member_13
ENSG00000111817	209.161511884415	1807.27824056086	3.11031619744665	7.32978388910747e-12	1.12486822954433e-10	DSE	chr6	+	116254173	116444860	15016	protein_coding	dermatan_sulfate_epimerase
ENSG00000086730	26.5977574016326	301.946001879237	3.4983558164815	7.34812846017741e-12	1.12705454982342e-10	LAT2	chr7	+	74199652	74229834	4545	protein_coding	linker_for_activation_of_T-cells_family_member_2
ENSG00000274265	672.451276550198	70.8595004036422	-3.24429790392888	7.40161458482979e-12	1.1346254330959e-10	CH17-189H20.1	chr1	+	149176022	149251013	1331	lincRNA	NA
ENSG00000062038	3114.58459929568	368.437868650147	-3.07914930909	7.44898339875849e-12	1.14125065431341e-10	CDH3	chr16	+	68636189	68722616	6236	protein_coding	cadherin_3_type_1_P-cadherin_(placental)
ENSG00000196787	308.24130562847	26.1682290913477	-3.55234886634474	7.51460052539206e-12	1.15066274526062e-10	HIST1H2AG	chr6	+	27133042	27135291	2250	protein_coding	histone_cluster_1_H2ag
ENSG00000116752	5786.06928216151	695.447045905537	-3.05636110503259	7.59355472637947e-12	1.16210544535427e-10	BCAS2	chr1	-	114567557	114581639	1299	protein_coding	breast_carcinoma_amplified_sequence_2
ENSG00000095585	109.164305038094	3.27767348587998	-5.0088401794534	7.66796551036863e-12	1.17218854641828e-10	BLNK	chr10	-	96191702	96271587	3655	protein_coding	B-cell_linker
ENSG00000250091	109.164305038094	3.27767348587998	-5.0088401794534	7.66796551036863e-12	1.17218854641828e-10	DNAH10OS	chr12	-	123926424	123934984	5040	protein_coding	dynein_axonemal_heavy_chain_10_opposite_strand
ENSG00000163636	15922.4821449619	1941.35200210103	-3.03585658709984	7.78903459479374e-12	1.18968276129235e-10	PSMD6	chr3	-	64010549	64024010	9123	protein_coding	proteasome_26S_subunit_non-ATPase_6
ENSG00000165105	1783.42928457113	206.023307494139	-3.11306174944997	7.79559920760735e-12	1.18968276129235e-10	RASEF	chr9	-	82979585	83063177	6649	protein_coding	RAS_and_EF-hand_domain_containing
ENSG00000246898	1.38777878078145e-17	67.5894078031772	9.08657502812154	7.81283414982964e-12	1.18968276129235e-10	LINC00920	chr16	+	66408524	66412135	2147	lincRNA	long_intergenic_non-protein_coding_RNA_920
ENSG00000071242	66.0462338974126	1.38777878078145e-17	-9.05362791173571	7.81283414982964e-12	1.18968276129235e-10	RPS6KA2	chr6	-	166409364	166906451	8243	protein_coding	ribosomal_protein_S6_kinase_90kDa_polypeptide_2
ENSG00000151025	66.0462338974126	1.38777878078145e-17	-9.05362791173571	7.81283414982964e-12	1.18968276129235e-10	GPR158	chr10	+	25175062	25602226	7726	protein_coding	G_protein-coupled_receptor_158
ENSG00000163093	66.0462338974126	1.38777878078145e-17	-9.05362791173571	7.81283414982964e-12	1.18968276129235e-10	BBS5	chr2	+	169479178	169506655	4556	protein_coding	Bardet-Biedl_syndrome_5
ENSG00000154529	1.38777878078145e-17	67.5894078031772	9.08657502812154	7.81283414982964e-12	1.18968276129235e-10	CNTNAP3B	chr9	-	41890314	42129510	13220	protein_coding	contactin_associated_protein-like_3B
ENSG00000151726	2175.16141381772	253.984654964145	-3.0977319315458	7.81701301645492e-12	1.18968276129235e-10	ACSL1	chr4	-	184755595	184826818	6284	protein_coding	acyl-CoA_synthetase_long-chain_family_member_1
ENSG00000173917	2.74500333963777	90.4800550857957	4.97695104823068	7.8791768086641e-12	1.19848031756124e-10	HOXB2	chr17	-	48540894	48544989	2336	protein_coding	homeobox_B2
ENSG00000277758	307.323900144081	26.1682290913477	-3.54805046811999	7.99211827236182e-12	1.21498753238376e-10	ABC7-42404400C24.1	chr10	-	47750864	47763592	5526	protein_coding	Synaptotagmin-15_
ENSG00000079435	19.258493690133	241.994318160145	3.64228202909261	8.01808114060736e-12	1.21826104667317e-10	LIPE	chr19	-	42401507	42427426	5206	protein_coding	lipase_hormone-sensitive
ENSG00000133816	93.5684083346785	851.321419610203	3.18378288229746	8.07562252605054e-12	1.22632631192113e-10	MICAL2	chr11	+	12094008	12263789	15809	protein_coding	microtubule_associated_monooxygenase_calponin_and_LIM_domain_containing_2
ENSG00000169251	9632.75035146702	1173.97047234081	-3.03642756717463	8.12959451632327e-12	1.23384094256847e-10	NMD3	chr3	+	161104696	161253532	4869	protein_coding	NMD3_ribosome_export_adaptor
ENSG00000111907	2838.44555750292	336.826981229774	-3.0745872002668	8.20333520151728e-12	1.24434595354069e-10	TPD52L1	chr6	+	125119049	125264407	7595	protein_coding	tumor_protein_D52-like_1
ENSG00000196092	77.9725102828509	1.09771269193672	-6.0068818113893	8.21273009371691e-12	1.24508429055848e-10	PAX5	chr9	-	36833275	37034185	9333	protein_coding	paired_box_5
ENSG00000103089	363.285634423322	33.7984469860363	-3.42161026419395	8.91487896644959e-12	1.3507883551313e-10	FA2H	chr16	-	74712955	74774831	3279	protein_coding	fatty_acid_2-hydroxylase
ENSG00000132205	16.5062667383555	214.743552544675	3.690861061623	9.231994484314e-12	1.3980676228696e-10	EMILIN2	chr18	+	2847030	2915993	6435	protein_coding	elastin_microfibril_interfacer_2
ENSG00000160685	2787.07085205079	332.466858819036	-3.06702764233681	9.33645668701354e-12	1.41310894523698e-10	ZBTB7B	chr1	+	155002630	155018522	4303	protein_coding	zinc_finger_and_BTB_domain_containing_7B
ENSG00000188523	2.74500333963777	89.3900243048503	4.95948780622732	9.53558820174878e-12	1.44245440669028e-10	CFAP77	chr9	+	132410043	132573317	2147	protein_coding	cilia_and_flagella_associated_protein_77
ENSG00000242173	98.1554368915377	2.18769296388965	-5.4144123391941	9.57922594954504e-12	1.44825889410906e-10	ARHGDIG	chr16	+	268727	283010	2429	protein_coding	Rho_GDP_dissociation_inhibitor_(GDI)_gamma
ENSG00000167549	6.41472570341761	127.541100026463	4.28544515900115	9.70659628208034e-12	1.46670936457962e-10	CORO6	chr17	-	29614756	29622907	4321	protein_coding	coronin_6
ENSG00000158747	945.838103300328	105.740485691512	-3.15967022762981	9.76345832071899e-12	1.47449130850133e-10	NBL1	chr1	+	19640554	19658456	3465	protein_coding	neuroblastoma_1_DAN_family_BMP_antagonist
ENSG00000134262	1439.4022388275	166.782204322688	-3.10855247631657	9.81035960082387e-12	1.48076124798165e-10	AP4B1	chr1	-	113894748	113905201	5369	protein_coding	adaptor_related_protein_complex_4_beta_1_subunit
ENSG00000147119	21.0933105412288	256.164716197485	3.5939034906853	9.86073353572115e-12	1.48754817863888e-10	CHST7	chrX	+	46573784	46598408	2289	protein_coding	carbohydrate_(N-acetylglucosamine_6-O)_sulfotransferase_7
ENSG00000169432	1.38777878078145e-17	66.4993769246016	9.06315955702619	9.95921715802469e-12	1.4999366432795e-10	SCN9A	chr2	-	166195185	166375993	10364	protein_coding	sodium_channel_voltage_gated_type_IX_alpha_subunit
ENSG00000166840	1.38777878078145e-17	66.4993769246016	9.06315955702619	9.95921715802469e-12	1.4999366432795e-10	GLYATL1	chr11	+	58905398	59043527	5440	protein_coding	glycine-N-acyltransferase_like_1
ENSG00000231956	1.38777878078145e-17	66.4993769246016	9.06315955702619	9.95921715802469e-12	1.4999366432795e-10	HNRNPA1P9	chr7	+	87521461	87522410	950	processed_pseudogene	heterogeneous_nuclear_ribonucleoprotein_A1_pseudogene_9
ENSG00000127084	564.197432029094	58.8691605930386	-3.25808712046447	1.01203205042485e-11	1.52336581383326e-10	FGD3	chr9	+	92947451	93036236	5890	protein_coding	FYVE_RhoGEF_and_PH_domain_containing_3
ENSG00000142149	77.0551044581921	1.09771269193672	-5.98983568324469	1.01587399607864e-11	1.52664211836933e-10	HUNK	chr21	+	31873315	32044633	8294	protein_coding	hormonally_up-regulated_Neu-associated_kinase
ENSG00000225511	77.0551044581921	1.09771269193672	-5.98983568324469	1.01587399607864e-11	1.52664211836933e-10	LINC00475	chr9	+	92141298	92160114	3858	lincRNA	long_intergenic_non-protein_coding_RNA_475
ENSG00000151572	0.9101298099858	78.4897162846543	6.23730553369082	1.01587399607864e-11	1.52664211836933e-10	ANO4	chr12	+	100717526	101128641	4997	protein_coding	anoctamin_4
ENSG00000184557	37.6066413200733	386.968388821282	3.35855585720495	1.0170745068945e-11	1.52761146991293e-10	SOCS3	chr17	-	78356778	78360077	2734	protein_coding	suppressor_of_cytokine_signaling_3
ENSG00000166173	65.1288279528006	613.694751879013	3.23351821264893	1.03252979274653e-11	1.54997826584729e-10	LARP6	chr15	-	70829130	70854159	5554	protein_coding	La_ribonucleoprotein_domain_family_member_6
ENSG00000105137	68.7984516656246	637.675424805282	3.20988417612676	1.04129069347799e-11	1.56227688823448e-10	SYDE1	chr19	+	15107403	15114988	3965	protein_coding	synapse_defective_1_Rho_GTPase_homolog_1_(C._elegans)
ENSG00000003147	1370.59682965175	158.061959045245	-3.11531289789083	1.04358667072394e-11	1.56486788612754e-10	ICA1	chr7	-	8113184	8262687	4891	protein_coding	islet_cell_autoantigen_1
ENSG00000198890	3615.48797738995	437.109796224518	-3.04778909328765	1.05241294003101e-11	1.57724295715492e-10	PRMT6	chr1	+	107056679	107059294	2616	protein_coding	protein_arginine_methyltransferase_6
ENSG00000136943	21.0933105412288	255.074685580953	3.58775425968355	1.06158809073432e-11	1.5901271287192e-10	CTSV	chr9	-	97029679	97039643	4700	protein_coding	cathepsin_V
ENSG00000140465	203.65707877387	14.1778906812214	-3.83349706261066	1.06265269696543e-11	1.59085529772707e-10	CYP1A1	chr15	-	74719542	74725610	3435	protein_coding	cytochrome_P450_family_1_subfamily_A_member_1
ENSG00000232818	2.74500333963777	88.2999935203614	4.9418105859525	1.15570125498786e-11	1.72921328691084e-10	RPS2P32	chr7	+	23490473	23491364	892	processed_pseudogene	ribosomal_protein_S2_pseudogene_32
ENSG00000166126	11.9192148715908	170.052296287562	3.81976907872846	1.19671908902111e-11	1.78961237994397e-10	AMN	chr14	+	102922656	102933596	4646	protein_coding	amnion_associated_transmembrane_protein
ENSG00000165617	1.38777878078145e-17	65.4093460398824	9.0393577654801	1.27256663685870e-11	1.89479453601793e-10	DACT1	chr14	+	58633967	58648321	4490	protein_coding	dishevelled-binding_antagonist_of_beta-catenin_1
ENSG00000139567	1.38777878078145e-17	65.4093460398824	9.0393577654801	1.27256663685870e-11	1.89479453601793e-10	ACVRL1	chr12	+	51906908	51923361	5040	protein_coding	activin_A_receptor_type_IL
ENSG00000187172	64.2114219965967	1.38777878078145e-17	-9.01306349499806	1.27256663685870e-11	1.89479453601793e-10	BAGE2	chr21	+	10413477	10516431	4080	transcribed_unprocessed_pseudogene	B_melanoma_antigen_family_member_2
ENSG00000243811	1.38777878078145e-17	65.4093460398824	9.0393577654801	1.27256663685870e-11	1.89479453601793e-10	APOBEC3D	chr22	+	39014363	39033276	2545	protein_coding	apolipoprotein_B_mRNA_editing_enzyme_catalytic_polypeptide-like_3D
ENSG00000161031	64.2114219965967	1.38777878078145e-17	-9.01306349499806	1.27256663685870e-11	1.89479453601793e-10	PGLYRP2	chr19	-	15468645	15498956	3188	protein_coding	peptidoglycan_recognition_protein_2
ENSG00000255248	1.38777878078145e-17	65.4093460398824	9.0393577654801	1.27256663685870e-11	1.89479453601793e-10	RP11-166D19.1	chr11	-	122028355	122116323	7117	sense_overlapping	NA
ENSG00000120156	1.38777878078145e-17	65.4093460398824	9.0393577654801	1.27256663685870e-11	1.89479453601793e-10	TEK	chr9	+	27109141	27230175	4805	protein_coding	TEK_tyrosine_kinase_endothelial
ENSG00000101463	64.2114219965967	1.38777878078145e-17	-9.01306349499806	1.27256663685870e-11	1.89479453601793e-10	SYNDIG1	chr20	+	24469199	24666616	2847	protein_coding	synapse_differentiation_inducing_1
ENSG00000105926	163.291235235492	1389.79652767927	3.08831476261037	1.27326878138931e-11	1.89481411022659e-10	MPP6	chr7	+	24573268	24694193	9369	protein_coding	membrane_protein_palmitoylated_6
ENSG00000100473	105.494682377618	926.533529923718	3.13305811274397	1.27781969228465e-11	1.90055810478746e-10	COCH	chr14	+	30874514	30895065	3621	protein_coding	cochlin
ENSG00000176153	123.842795232227	5.45768452873822	-4.47500540973127	1.28766369125404e-11	1.9141642796312e-10	GPX2	chr14	-	64939152	64942905	1499	protein_coding	glutathione_peroxidase_2
ENSG00000160233	65.1288279528006	607.154568351727	3.21806377097583	1.28872947679808e-11	1.91471363270794e-10	LRRC3	chr21	+	44455486	44462196	5869	protein_coding	leucine_rich_repeat_containing_3
ENSG00000142197	2143.05222290055	257.254746813746	-3.05782986401651	1.30203820197691e-11	1.93344236460945e-10	DOPEY2	chr21	+	36156782	36294274	9030	protein_coding	dopey_family_member_2
ENSG00000067082	326.589415282131	2681.48276685218	3.03696337196106	1.34442817020583e-11	1.99531133884676e-10	KLF6	chr10	-	3775996	3785281	6139	protein_coding	Kruppel-like_factor_6
ENSG00000124813	224.757405601473	17.4479815520228	-3.67843464424366	1.3683630286677e-11	2.02973849252375e-10	RUNX2	chr6	+	45328157	45664349	8192	protein_coding	runt-related_transcription_factor_2
ENSG00000171793	338.515686525236	2769.77524393037	3.03197509474501	1.41624785304227e-11	2.09963515938089e-10	CTPS1	chr1	+	40979335	41012565	5462	protein_coding	CTP_synthase_1
ENSG00000006283	78.8899161001786	706.347351767929	3.16030134571944	1.47606280315929e-11	2.18713379039244e-10	CACNA1G	chr17	+	50561068	50627474	9709	protein_coding	calcium_channel_voltage-dependent_T_type_alpha_1G_subunit
ENSG00000134574	2081.58605742855	251.804593729691	-3.04672757208758	1.48723513890534e-11	2.20250153769713e-10	DDB2	chr11	+	47214465	47239240	4897	protein_coding	damage-specific_DNA_binding_protein_2
ENSG00000175745	149.530151812021	8.72774907734345	-4.0807340219644	1.49494179568201e-11	2.21272305290909e-10	NR2F1	chr5	+	93583337	93594615	4201	protein_coding	nuclear_receptor_subfamily_2_group_F_member_1
ENSG00000102057	29.3499793347138	315.026369153878	3.4181259360652	1.50235057104267e-11	2.22249290232622e-10	KCND1	chrX	-	48961378	48971569	5807	protein_coding	potassium_channel_voltage_gated_Shal_related_subfamily_D_member_1
ENSG00000022267	333.928659126786	2721.81389835727	3.02645076173446	1.50381285580540e-11	2.22346007244648e-10	FHL1	chrX	+	136146702	136211359	5997	protein_coding	four_and_a_half_LIM_domains_1
ENSG00000156398	1210.05087485693	141.711498977792	-3.09300492724149	1.50565705662564e-11	2.22499058109951e-10	SFXN2	chr10	+	102714538	102743492	8034	protein_coding	sideroflexin_2
ENSG00000116729	176.134912887937	1479.17903541773	3.06908152296145	1.54363260712606e-11	2.27988401334983e-10	WLS	chr1	-	68098473	68233120	4469	protein_coding	wntless_Wnt_ligand_secretion_mediator
ENSG00000273812	0.9101298099858	76.309654629192	6.19672885250119	1.56288090990843e-11	2.30459988758133e-10	WI2-87327B8.2	chr20	-	62596732	62603115	625	lincRNA	NA
ENSG00000151468	0.9101298099858	76.309654629192	6.19672885250119	1.56288090990843e-11	2.30459988758133e-10	CCDC3	chr10	-	12896625	13099652	3683	protein_coding	coiled-coil_domain_containing_3
ENSG00000128510	1.82754864465077	76.309654629192	5.28563084323496	1.56288090990843e-11	2.30459988758133e-10	CPA4	chr7	+	130293134	130324180	3958	protein_coding	carboxypeptidase_A4
ENSG00000281903	8.2495612111708	141.711498977792	4.08084936341326	1.57641483121903e-11	2.32331105430625e-10	AF127936.7	chr21	-	14819699	14918552	3635	lincRNA	NA
ENSG00000125657	40.3588610654512	402.228817178301	3.31278507002535	1.58751635347108e-11	2.33841924139305e-10	TNFSF9	chr19	+	6530999	6535928	1665	protein_coding	tumor_necrosis_factor_superfamily_member_9
ENSG00000159433	17.4236759818468	216.923613802838	3.62799141710425	1.59154473179576e-11	2.34309805509182e-10	STARD9	chr15	+	42575659	42720981	20706	protein_coding	StAR_related_lipid_transfer_domain_containing_9
ENSG00000260618	95.4032197703369	2.18769296388965	-5.37343780085038	1.62787149886089e-11	2.3882489264776e-10	RP11-23N2.4	chr15	+	52577842	52598709	1211	antisense	NA
ENSG00000174015	63.2940160283793	1.38777878078145e-17	-8.99234540331124	1.63002917530215e-11	2.3882489264776e-10	SPERT	chr13	+	45702311	45714559	2125	protein_coding	spermatid_associated
ENSG00000148680	1.38777878078145e-17	64.3193151488545	9.01515669191184	1.63002917530215e-11	2.3882489264776e-10	HTR7	chr10	-	90740823	90857698	3131	protein_coding	5-hydroxytryptamine_(serotonin)_receptor_7_adenylate_cyclase-coupled
ENSG00000261026	63.2940160283793	1.38777878078145e-17	-8.99234540331124	1.63002917530215e-11	2.3882489264776e-10	CTD-3247F14.2	chr8	-	22679013	22684009	4997	sense_overlapping	NA
ENSG00000183036	63.2940160283793	1.38777878078145e-17	-8.99234540331124	1.63002917530215e-11	2.3882489264776e-10	PCP4	chr21	+	39867317	39929397	1106	protein_coding	Purkinje_cell_protein_4
ENSG00000133107	1.38777878078145e-17	64.3193151488545	9.01515669191184	1.63002917530215e-11	2.3882489264776e-10	TRPC4	chr13	-	37636636	37870425	4205	protein_coding	transient_receptor_potential_cation_channel_subfamily_C_member_4
ENSG00000230638	63.2940160283793	1.38777878078145e-17	-8.99234540331124	1.63002917530215e-11	2.3882489264776e-10	RP11-486B10.4	chr1	+	41542069	41544310	2242	processed_pseudogene	NA
ENSG00000081818	63.2940160283793	1.38777878078145e-17	-8.99234540331124	1.63002917530215e-11	2.3882489264776e-10	PCDHB4	chr5	+	141121799	141125623	3825	protein_coding	protocadherin_beta_4
ENSG00000173467	63.2940160283793	1.38777878078145e-17	-8.99234540331124	1.63002917530215e-11	2.3882489264776e-10	AGR3	chr7	-	16859405	16881987	1160	protein_coding	anterior_gradient_3_protein_disulphide_isomerase_family_member
ENSG00000244405	100.907653976477	875.302092468058	3.11505962955202	1.66669656790572e-11	2.44067211469517e-10	ETV5	chr3	-	186046308	186110318	5802	protein_coding	ets_variant_5
ENSG00000006634	289.893195906113	2357.74368421275	3.02323099639032	1.71966406161426e-11	2.516896293691e-10	DBF4	chr7	+	87876216	87909541	4583	protein_coding	DBF4_zinc_finger
ENSG00000152229	421.999584708343	42.5186957319358	-3.30755608632072	1.72809819912479e-11	2.52789513692185e-10	PSTPIP2	chr18	-	45983536	46072272	4120	protein_coding	proline-serine-threonine_phosphatase_interacting_protein_2
ENSG00000075142	196.317834595224	1624.15310282185	3.04756259780051	1.80128811980351e-11	2.63355792571591e-10	SRI	chr7	-	88205118	88226993	4237	protein_coding	sorcin
ENSG00000148803	50.4503309159443	477.44092816761	3.2389844171283	1.82787260913834e-11	2.67100555918775e-10	FUOM	chr10	-	133355154	133358035	1284	protein_coding	fucose_mutarotase
ENSG00000146281	553.188566464606	4413.54136017597	2.99578891751922	1.84542400474645e-11	2.69522068797302e-10	PM20D2	chr6	+	89146050	89165565	4708	protein_coding	peptidase_M20_domain_containing_2
ENSG00000205133	2576.98500296059	318.296460968946	-3.01678447496244	1.91801593930451e-11	2.79975352159306e-10	TRIQK	chr8	-	92883530	93017673	6724	protein_coding	triple_QxxK/R_motif_containing
ENSG00000262576	74.3028869379177	1.09771269193672	-5.93745447266832	1.94395848616447e-11	2.83611683437714e-10	PCDHGA4	chr5	+	141355025	141512979	4887	protein_coding	protocadherin_gamma_subfamily_A_4
ENSG00000154553	45.8632995896368	437.109796224518	3.24883886067503	1.95564360222094e-11	2.85165189314305e-10	PDLIM3	chr4	-	185500660	185535612	9117	protein_coding	PDZ_and_LIM_domain_3
ENSG00000119771	39.4414545240862	389.148450016151	3.29816701218695	2.02714038251096e-11	2.95433956859745e-10	KLHL29	chr2	+	23385217	23708611	11071	protein_coding	kelch_like_family_member_29
ENSG00000223652	103.659871027707	3.27767348587998	-4.93428866144381	2.04015018765281e-11	2.97172512238559e-10	AC106786.1	chr5	-	123087248	123090299	1020	antisense	NA
ENSG00000135679	2964.13010476653	369.527899249215	-3.00346082434073	2.06237320092179e-11	3.00250531490472e-10	MDM2	chr12	+	68808172	68850686	13273	protein_coding	MDM2_proto-oncogene_E3_ubiquitin_protein_ligase
ENSG00000163710	11.0018028728265	164.602143008622	3.88704187194144	2.0666328525643e-11	3.00711481896142e-10	PCOLCE2	chr3	-	142815922	142889203	3480	protein_coding	procollagen_C-endopeptidase_enhancer_2
ENSG00000230524	62.3766100477061	1.38777878078145e-17	-8.97132544532709	2.09310564555844e-11	3.03120054547144e-10	COL6A4P1	chr3	-	15151833	15205959	4566	unitary_pseudogene	collagen_type_VI_alpha_4_pseudogene_1
ENSG00000164604	1.38777878078145e-17	63.2292842513486	8.99054271128689	2.09310564555844e-11	3.03120054547144e-10	GPR85	chr7	-	113078331	113087778	7396	protein_coding	G_protein-coupled_receptor_85
ENSG00000241111	62.3766100477061	1.38777878078145e-17	-8.97132544532709	2.09310564555844e-11	3.03120054547144e-10	PRICKLE2-AS1	chr3	+	64067964	64103131	6505	antisense	PRICKLE2_antisense_RNA_1
ENSG00000180318	1.38777878078145e-17	63.2292842513486	8.99054271128689	2.09310564555844e-11	3.03120054547144e-10	ALX1	chr12	+	85280107	85301784	1445	protein_coding	ALX_homeobox_1
ENSG00000148942	62.3766100477061	1.38777878078145e-17	-8.97132544532709	2.09310564555844e-11	3.03120054547144e-10	SLC5A12	chr11	-	26667019	26723427	7544	protein_coding	solute_carrier_family_5_(sodium/monocarboxylate_cotransporter)_member_12
ENSG00000182397	1.38777878078145e-17	63.2292842513486	8.99054271128689	2.09310564555844e-11	3.03120054547144e-10	DNM1P46	chr15	-	99790156	99806927	3979	transcribed_unprocessed_pseudogene	dynamin_1_pseudogene_46
ENSG00000267640	1.38777878078145e-17	63.2292842513486	8.99054271128689	2.09310564555844e-11	3.03120054547144e-10	CTD-2554C21.2	chr19	+	37817359	37826638	1352	lincRNA	NA
ENSG00000250682	1.38777878078145e-17	63.2292842513486	8.99054271128689	2.09310564555844e-11	3.03120054547144e-10	LINC00491	chr5	-	102609156	102671559	1227	lincRNA	long_intergenic_non-protein_coding_RNA_491
ENSG00000184838	1.38777878078145e-17	63.2292842513486	8.99054271128689	2.09310564555844e-11	3.03120054547144e-10	PRR16	chr5	+	120464278	120687332	2274	protein_coding	proline_rich_16
ENSG00000104447	6265.87233470463	795.729859785536	-2.97698288670755	2.12916442919624e-11	3.08179741933294e-10	TRPS1	chr8	-	115408496	115809673	11072	protein_coding	trichorhinophalangeal_syndrome_I
ENSG00000080031	31.1847935465631	324.836644595049	3.37524724651743	2.13315535235074e-11	3.08594978143071e-10	PTPRH	chr19	-	55181248	55209506	4344	protein_coding	protein_tyrosine_phosphatase_receptor_type_H
ENSG00000088543	15.5888571884922	197.303062412522	3.65055612231396	2.22164212270725e-11	3.21227024272198e-10	C3orf18	chr3	-	50558025	50571027	3248	protein_coding	chromosome_3_open_reading_frame_18
ENSG00000198853	118.338361485234	1000.65560961919	3.07852247350412	2.25509783487574e-11	3.25893040236036e-10	RUSC2	chr9	+	35490127	35561898	5682	protein_coding	RUN_and_SH3_domain_containing_2
ENSG00000168899	120.17317274351	5.45768452873822	-4.43165706523892	2.28784076263778e-11	3.30451201750533e-10	VAMP5	chr2	+	85584408	85593412	819	protein_coding	vesicle_associated_membrane_protein_5
ENSG00000114948	12.8366262054278	172.232357593483	3.73228438101736	2.35996657199485e-11	3.40689977409083e-10	ADAM23	chr2	+	206443539	206621130	6421	protein_coding	ADAM_metallopeptidase_domain_23
ENSG00000171903	110.999116349814	4.36767330927077	-4.63111388442658	2.37924710720758e-11	3.43293151601865e-10	CYP4F11	chr19	-	15912367	15934867	4027	protein_coding	cytochrome_P450_family_4_subfamily_F_member_11
ENSG00000198189	103.659871027707	881.842275974018	3.08702578332042	2.39090502155398e-11	3.44794331398826e-10	HSD17B11	chr4	-	87336610	87391386	2435	protein_coding	hydroxysteroid_(17-beta)_dehydrogenase_11
ENSG00000175294	13.7540369826991	179.862572140597	3.69616987991409	2.39734215406186e-11	3.45541439092532e-10	CATSPER1	chr11	-	66016752	66026517	2687	protein_coding	cation_channel_sperm_associated_1
ENSG00000153551	4.57987785670322	103.560424210119	4.4597521061731	2.41051648552996e-11	3.47076512400835e-10	CMTM7	chr3	+	32391671	32483067	3751	protein_coding	CKLF-like_MARVEL_transmembrane_domain_containing_7
ENSG00000162949	101.825059663847	3.27767348587998	-4.90855675527853	2.41051648552996e-11	3.47076512400835e-10	CAPN13	chr2	-	30722771	30820542	5191	protein_coding	calpain_13
ENSG00000234409	1.82754864465077	75.2196237942766	5.26490635318575	2.4225846285913e-11	3.48085161289913e-10	CCDC188	chr22	-	20148427	20151065	1598	protein_coding	coiled-coil_domain_containing_188
ENSG00000276644	0.9101298099858	75.2196237942766	6.17600436245198	2.4225846285913e-11	3.48085161289913e-10	DACH1	chr13	-	71437966	71867192	5389	protein_coding	dachshund_family_transcription_factor_1
ENSG00000171450	1.82754864465077	75.2196237942766	5.26490635318575	2.4225846285913e-11	3.48085161289913e-10	CDK5R2	chr2	+	218959655	218962162	2508	protein_coding	cyclin-dependent_kinase_5_regulatory_subunit_2_(p39)
ENSG00000206262	1.82754864465077	75.2196237942766	5.26490635318575	2.4225846285913e-11	3.48085161289913e-10	FOXL2NB	chr3	+	138947234	138953451	4567	protein_coding	FOXL2_neighbor
ENSG00000048828	8539.20305012642	1100.93842328326	-2.95523654924285	2.48041169803059e-11	3.56207843903599e-10	FAM120A	chr9	+	93451722	93566107	7204	protein_coding	family_with_sequence_similarity_120A
ENSG00000204956	128.429823294625	6.54770241941083	-4.26976825442584	2.4847267331203e-11	3.5646331055773e-10	PCDHGA1	chr5	+	141330571	141512981	6252	protein_coding	protocadherin_gamma_subfamily_A_1
ENSG00000167778	2073.32940833508	257.254746813746	-3.01011518158894	2.48478297639783e-11	3.5646331055773e-10	SPRYD3	chr12	-	53064316	53079420	3479	protein_coding	SPRY_domain_containing_3
ENSG00000141505	2.74500333963777	85.0299011447181	4.88744095604996	2.53131771689575e-11	3.62760648943982e-10	ASGR1	chr17	-	7173431	7179564	3748	protein_coding	asialoglycoprotein_receptor_1
ENSG00000010295	2.74500333963777	85.0299011447181	4.88744095604996	2.53131771689575e-11	3.62760648943982e-10	IFFO1	chr12	-	6538375	6556083	5203	protein_coding	intermediate_filament_family_orphan_1
ENSG00000136378	63.2940160283793	570.093528346289	3.1683594882798	2.58084386522575e-11	3.69665558008195e-10	ADAMTS7	chr15	-	78759203	78811431	7730	protein_coding	ADAM_metallopeptidase_with_thrombospondin_type_1_motif_7
ENSG00000105877	12.8366262054278	171.142326940914	3.72313102164632	2.62467250650922e-11	3.75747624161948e-10	DNAH11	chr7	+	21543215	21901839	15998	protein_coding	dynein_axonemal_heavy_chain_11
ENSG00000227742	61.4592040541119	1.38777878078145e-17	-8.94999469432976	2.69457278508675e-11	3.85353334179255e-10	CALR4P	chr1	-	51561866	51594897	946	unitary_pseudogene	calreticulin_4_pseudogene
ENSG00000103460	61.4592040541119	1.38777878078145e-17	-8.94999469432976	2.69457278508675e-11	3.85353334179255e-10	TOX3	chr16	-	52438005	52547802	5031	protein_coding	TOX_high_mobility_group_box_family_member_3
ENSG00000180592	110.08171069544	4.36767330927077	-4.61915471549994	2.78100782778354e-11	3.97507776880848e-10	SKIDA1	chr10	-	21513478	21526368	6700	protein_coding	SKI/DACH_domain_containing_1
ENSG00000187017	825.657988299518	95.9302089403432	-3.10395809617434	2.84971492561104e-11	4.07116935944047e-10	ESPN	chr1	+	6424788	6461370	4651	protein_coding	espin
ENSG00000157693	1436.65002246069	176.59248019619	-3.02338922296312	2.91280751319776e-11	4.1591443105115e-10	C9orf91	chr9	+	114611206	114646422	4792	protein_coding	chromosome_9_open_reading_frame_91
ENSG00000240891	15.5888571884922	194.032970498163	3.62645900461164	2.9456725421298e-11	4.20388897670533e-10	PLCXD2	chr3	+	111674676	111846447	2927	protein_coding	phosphatidylinositol-specific_phospholipase_C_X_domain_containing_2
ENSG00000013725	0.9101298099858	74.1295929543996	6.1549778182636	3.02493725681559e-11	4.31030049221169e-10	CD6	chr11	+	60971680	61020377	5958	protein_coding	CD6_molecule
ENSG00000177335	0.9101298099858	74.1295929543996	6.1549778182636	3.02493725681559e-11	4.31030049221169e-10	C8orf31	chr8	+	143039209	143059942	2929	processed_transcript	chromosome_8_open_reading_frame_31
ENSG00000109667	0.9101298099858	74.1295929543996	6.1549778182636	3.02493725681559e-11	4.31030049221169e-10	SLC2A9	chr4	-	9771153	10054936	6614	protein_coding	solute_carrier_family_2_(facilitated_glucose_transporter)_member_9
ENSG00000163634	5520.02170044204	712.8875352846	-2.95272513287261	3.11963202540455e-11	4.44293114089335e-10	THOC7	chr3	-	63833870	63863903	1784	protein_coding	THO_complex_7
ENSG00000116761	29.3499793347138	303.036032486376	3.36216388473223	3.12195022035009e-11	4.44393131520951e-10	CTH	chr1	+	70411218	70439851	2414	protein_coding	cystathionine_gamma-lyase
ENSG00000154229	205.491889812858	1645.95371445927	3.00095024600695	3.16259024403808e-11	4.49945133477968e-10	PRKCA	chr17	+	66302636	66810743	11152	protein_coding	protein_kinase_C_alpha
ENSG00000167600	5.49730390528178	111.190639352668	4.30553813971954	3.25373088253024e-11	4.62672456052037e-10	CYP2S1	chr19	+	41193049	41207539	2874	protein_coding	cytochrome_P450_family_2_subfamily_S_member_1
ENSG00000157350	181.639346115776	1458.46845435756	3.00437741183393	3.34852740250055e-11	4.75906212383295e-10	ST3GAL2	chr16	-	70375978	70439237	9744	protein_coding	ST3_beta-galactoside_alpha-23-sialyltransferase_2
ENSG00000005884	2523.77548659451	19183.4557309331	2.92614080852288	3.37468582485250e-11	4.79363489929536e-10	ITGA3	chr17	+	50055968	50090481	9802	protein_coding	integrin_subunit_alpha_3
ENSG00000164794	4.57987785670322	101.380362718367	4.42909257642748	3.37633933309157e-11	4.79363489929536e-10	KCNV1	chr8	-	109963645	109975847	6979	protein_coding	potassium_channel_voltage_gated_modifier_subfamily_V_member_1
ENSG00000255438	60.5417980471079	1.38777878078145e-17	-8.92834382168528	3.4778788272631e-11	4.92762213439271e-10	CTD-2653D5.1	chr20	+	47677901	47686297	2437	antisense	NA
ENSG00000226091	1.38777878078145e-17	62.1392533471915	8.96550148903953	3.4778788272631e-11	4.92762213439271e-10	LINC00937	chr12	-	8295986	8396803	5663	lincRNA	long_intergenic_non-protein_coding_RNA_937
ENSG00000144407	1.38777878078145e-17	62.1392533471915	8.96550148903953	3.4778788272631e-11	4.92762213439271e-10	PTH2R	chr2	+	208359714	208854503	4390	protein_coding	parathyroid_hormone_2_receptor
ENSG00000229373	1.38777878078145e-17	62.1392533471915	8.96550148903953	3.4778788272631e-11	4.92762213439271e-10	LINC00452	chr13	+	113888306	113923512	3578	lincRNA	long_intergenic_non-protein_coding_RNA_452
ENSG00000148180	7108.05054163931	931.983682843549	-2.93092291475934	3.53116787860859e-11	5.0005482919472e-10	GSN	chr9	+	121207794	121332843	11097	protein_coding	gelsolin
ENSG00000143702	329.341631724933	2564.84949465927	2.96070741627755	3.80099610237611e-11	5.37988645452627e-10	CEP170	chr1	-	243124428	243255348	10939	protein_coding	centrosomal_protein_170kDa
ENSG00000168743	2602.67235568864	334.646920024667	-2.95885059664852	3.95068212561403e-11	5.58887392677528e-10	NPNT	chr4	+	105894775	106004027	6117	protein_coding	nephronectin
ENSG00000109472	3587.04840830514	465.450591651714	-2.94578753377235	3.97604981128566e-11	5.62186868175665e-10	CPE	chr4	+	165361194	165498320	2958	protein_coding	carboxypeptidase_E
ENSG00000151715	99.0728425904154	3.27767348587998	-4.86907734054731	4.0026401216518e-11	5.65655734766424e-10	TMEM45B	chr11	+	129815819	129860003	3027	protein_coding	transmembrane_protein_45B
ENSG00000107829	1639.39662810942	206.023307494139	-2.99158201520002	4.00498689576428e-11	5.65696685261498e-10	FBXW4	chr10	-	101610664	101695295	5038	protein_coding	F-box_and_WD_repeat_domain_containing_4
ENSG00000169548	3.66244545564338	91.5700858632852	4.59486689542187	4.04084231657783e-11	5.70468195832684e-10	ZNF280A	chr22	-	22513736	22520270	2148	protein_coding	zinc_finger_protein_280A
ENSG00000188064	281.636546505247	26.1682290913477	-3.42218132509929	4.18537001190722e-11	5.90568808093692e-10	WNT7B	chr22	-	45920362	45977129	5051	protein_coding	wingless-type_MMTV_integration_site_family_member_7B
ENSG00000162738	41.2762675692771	389.148450016151	3.23278047096048	4.29222973915763e-11	6.05336461828584e-10	VANGL2	chr1	+	160400586	160428678	5340	protein_coding	VANGL_planar_cell_polarity_protein_2
ENSG00000204099	59.6243920261802	1.38777878078145e-17	-8.90636307234542	4.50078436469345e-11	6.33125681910152e-10	NEU4	chr2	+	241808825	241817413	4689	protein_coding	neuraminidase_4_(sialidase)
ENSG00000136110	1.38777878078145e-17	61.0492224362073	8.94001793093569	4.50078436469345e-11	6.33125681910152e-10	LECT1	chr13	-	52703264	52739812	1628	protein_coding	leukocyte_cell_derived_chemotaxin_1
ENSG00000151490	1.38777878078145e-17	61.0492224362073	8.94001793093569	4.50078436469345e-11	6.33125681910152e-10	PTPRO	chr12	+	15322397	15597399	7519	protein_coding	protein_tyrosine_phosphatase_receptor_type_O
ENSG00000165379	1.38777878078145e-17	61.0492224362073	8.94001793093569	4.50078436469345e-11	6.33125681910152e-10	LRFN5	chr14	+	41607570	41904549	6140	protein_coding	leucine_rich_repeat_and_fibronectin_type_III_domain_containing_5
ENSG00000235277	59.6243920261802	1.38777878078145e-17	-8.90636307234542	4.50078436469345e-11	6.33125681910152e-10	AF127577.8	chr21	+	14918534	14947096	781	antisense	NA
ENSG00000165512	58.7069859907873	515.591998862792	3.13172519768202	4.50602936228572e-11	6.33539435031798e-10	ZNF22	chr10	+	45000475	45005326	2551	protein_coding	zinc_finger_protein_22
ENSG00000095587	11.9192148715908	158.061959045245	3.71435604466385	4.53051575204802e-11	6.36656687261485e-10	TLL2	chr10	-	96364606	96513918	8151	protein_coding	tolloid_like_2
ENSG00000143061	9571.2841860396	1274.25328594617	-2.90894778563781	4.54550168658416e-11	6.38436373252047e-10	IGSF3	chr1	-	116574399	116667755	7400	protein_coding	immunoglobulin_superfamily_member_3
ENSG00000152518	5476.90364409415	722.69781055857	-2.92169714988039	4.6075321451573e-11	6.46818486595053e-10	ZFP36L2	chr2	-	43222402	43226609	3696	protein_coding	ZFP36_ring_finger_protein-like_2
ENSG00000113396	1.82754864465077	71.9495312592222	5.2008844153331	4.74447023326357e-11	6.65023832237418e-10	SLC27A6	chr5	+	128538013	129033642	3493	protein_coding	solute_carrier_family_27_(fatty_acid_transporter)_member_6
ENSG00000204397	0.9101298099858	71.9495312592222	6.11198242459933	4.74447023326357e-11	6.65023832237418e-10	CARD16	chr11	-	105041326	105101431	1688	protein_coding	caspase_recruitment_domain_family_member_16
ENSG00000260300	70.633263460031	1.09771269193672	-5.86451639665454	4.74447023326357e-11	6.65023832237418e-10	RP11-505K9.4	chr16	+	83908132	83951445	3055	protein_coding	NA
ENSG00000162849	6.41472570341761	116.64079295852	4.15667895461041	4.7814484471295e-11	6.69865581989345e-10	KIF26B	chr1	+	245154985	245709431	14403	protein_coding	kinesin_family_member_26B
ENSG00000198053	44.0284868745348	401.138786581903	3.18371017568489	4.96860544151809e-11	6.95731253804425e-10	SIRPA	chr20	+	1894167	1940592	5068	protein_coding	signal-regulatory_protein_alpha
ENSG00000272734	376.129311079484	39.2486025160081	-3.25672412901128	5.08565645363567e-11	7.11758972679056e-10	ADIRF-AS1	chr10	-	86965345	86971311	5748	processed_transcript	ADIRF_antisense_RNA_1
ENSG00000253910	146.777935094399	9.81777552253388	-3.88629029832956	5.11896888034067e-11	7.16056781171154e-10	PCDHGB2	chr5	+	141360042	141512979	4769	protein_coding	protocadherin_gamma_subfamily_B_2
ENSG00000133985	585.297757682563	67.5894078031772	-3.11212992732859	5.14013483765105e-11	7.18651998831935e-10	TTC9	chr14	+	70641787	70675360	5217	protein_coding	tetratricopeptide_repeat_domain_9
ENSG00000136002	70.633263460031	600.61438482356	3.0856171067699	5.2886953407868e-11	7.39046801661473e-10	ARHGEF4	chr2	+	130836916	131047263	10003	protein_coding	Rho_guanine_nucleotide_exchange_factor_4
ENSG00000127824	94.4858140547332	779.379401008274	3.04236648562127	5.33809420156888e-11	7.45570993587333e-10	TUBA4A	chr2	-	219249711	219278170	4079	protein_coding	tubulin_alpha_4a
ENSG00000246575	177.969723967072	13.0878609931684	-3.75355148541046	5.35498121335979e-11	7.47549940855876e-10	AC093162.5	chr2	+	85315041	85316529	704	unprocessed_pseudogene	NA
ENSG00000132382	544.014511824071	4101.79261401274	2.91423007944286	5.40612454964825e-11	7.54306601927329e-10	MYBBP1A	chr17	-	4538897	4555631	6203	protein_coding	MYB_binding_protein_(P160)_1a
ENSG00000203865	114.668738938863	5.45768452873822	-4.36409003213731	5.5552971868376e-11	7.74727322186719e-10	ATP1A1-AS1	chr1	-	116392247	116418622	2458	processed_transcript	ATP1A1_antisense_RNA_1
ENSG00000160352	397.229636974254	3017.21218585607	2.924749554608	5.57093310891991e-11	7.76514097457711e-10	ZNF714	chr19	+	21082159	21125270	8033	protein_coding	zinc_finger_protein_714
ENSG00000180044	2.74500333963777	80.669777921781	4.81160615798813	5.68531264488368e-11	7.91654597706056e-10	C3orf80	chr3	+	160225636	160228213	2578	protein_coding	chromosome_3_open_reading_frame_80
ENSG00000225684	2.74500333963777	80.669777921781	4.81160615798813	5.68531264488368e-11	7.91654597706056e-10	FAM225B	chr9	-	113103338	113111500	7407	lincRNA	family_with_sequence_similarity_225_member_B_(non-protein_coding)
ENSG00000110090	4597.11181348618	611.514690703347	-2.91003394011754	5.720474450944e-11	7.9614761070552e-10	CPT1A	chr11	-	68754620	68844410	6565	protein_coding	carnitine_palmitoyltransferase_1A_(liver)
ENSG00000225526	138.521284865009	8.72774907734345	-3.97050600792329	5.81728126922177e-11	8.09211189604794e-10	MKRN2OS	chr3	-	12514934	12561059	1829	protein_coding	MKRN2_opposite_strand
ENSG00000258405	1.38777878078145e-17	59.959191518217	8.91407612842742	5.84030352085219e-11	8.09955557876733e-10	ZNF578	chr19	+	52453576	52512154	7189	protein_coding	zinc_finger_protein_578
ENSG00000251003	1.38777878078145e-17	59.959191518217	8.91407612842742	5.84030352085219e-11	8.09955557876733e-10	ZFPM2-AS1	chr8	-	105780246	106060524	2213	processed_transcript	ZFPM2_antisense_RNA_1
ENSG00000166426	58.7069859907873	1.38777878078145e-17	-8.88404223845637	5.84030352085219e-11	8.09955557876733e-10	CRABP1	chr15	+	78340324	78348230	993	protein_coding	cellular_retinoic_acid_binding_protein_1
ENSG00000128739	1.38777878078145e-17	59.959191518217	8.91407612842742	5.84030352085219e-11	8.09955557876733e-10	SNRPN	chr15	+	24823637	24978723	2929	protein_coding	small_nuclear_ribonucleoprotein_polypeptide_N
ENSG00000267599	1.38777878078145e-17	59.959191518217	8.91407612842742	5.84030352085219e-11	8.09955557876733e-10	CTD-2050I18.2	chr19	+	31465653	31466431	293	lincRNA	NA
ENSG00000168970	58.7069859907873	1.38777878078145e-17	-8.88404223845637	5.84030352085219e-11	8.09955557876733e-10	JMJD7-PLA2G4B	chr15	+	41828095	41848155	7862	protein_coding	JMJD7-PLA2G4B_readthrough
ENSG00000196735	3.66244545564338	89.3900243048503	4.56014927127642	5.86757928632618e-11	8.13328114683752e-10	HLA-DQA1	chr6	+	32628179	32647062	6927	protein_coding	major_histocompatibility_complex_class_II_DQ_alpha_1
ENSG00000167693	82.5595393003994	685.636770627972	3.05188794595462	5.94339615195496e-11	8.23422355541125e-10	NXN	chr17	-	799313	979770	5880	protein_coding	nucleoredoxin
ENSG00000236393	1.82754864465077	70.8595004036422	5.17889646382217	5.96008927204393e-11	8.24903951034123e-10	RP11-320G24.1	chrX	+	40262917	40287720	3120	lincRNA	NA
ENSG00000178860	0.9101298099858	70.8595004036422	6.0899944730884	5.96008927204393e-11	8.24903951034123e-10	MSC	chr8	-	71841549	71844468	2113	protein_coding	musculin
ENSG00000221963	19.258493690133	216.923613802838	3.4845765501591	6.07881930718886e-11	8.40913530015094e-10	APOL6	chr22	+	35648395	35668409	10121	protein_coding	apolipoprotein_L6
ENSG00000143418	7471.34310148898	1008.28582370388	-2.88932093462954	6.10021519728939e-11	8.43449060536226e-10	CERS2	chr1	-	150960583	150975004	4644	protein_coding	ceramide_synthase_2
ENSG00000178078	1931.13156282787	251.804593729691	-2.9384979205868	6.31138495443504e-11	8.72208028301095e-10	STAP2	chr19	-	4324043	4342786	2766	protein_coding	signal_transducing_adaptor_family_member_2
ENSG00000145362	35.7718279381021	335.736950627286	3.2256436670916	6.49187706449328e-11	8.96700708943394e-10	ANK2	chr4	+	112818109	113383740	18224	protein_coding	ankyrin_2_neuronal
ENSG00000141540	17.4236759818468	200.573154321994	3.51499623572684	6.51421096427934e-11	8.99333914300432e-10	TTYH2	chr17	+	74213514	74262020	5375	protein_coding	tweety_family_member_2
ENSG00000197323	10634.5571073849	1444.29805678968	-2.88022051506261	6.58705332906677e-11	9.08934037143328e-10	TRIM33	chr1	-	114392777	114511160	9574	protein_coding	tripartite_motif_containing_33
ENSG00000261609	1946.72745556177	253.984654964145	-2.9376706168491	6.69575393935879e-11	9.23470055598326e-10	GAN	chr16	+	81314952	81390884	15406	protein_coding	gigaxonin
ENSG00000170175	66.9636398308348	562.463314223513	3.06777900759461	6.95828541585545e-11	9.591970286789e-10	CHRNB1	chr17	+	7445061	7457707	4329	protein_coding	cholinergic_receptor_nicotinic_beta_1
ENSG00000145506	39.4414545240862	364.077746252859	3.20212282426608	7.07790077121291e-11	9.75197139825282e-10	NKD2	chr5	+	1008829	1038943	2885	protein_coding	naked_cuticle_homolog_2_(Drosophila)
ENSG00000121743	11.0018028728265	153.701836384102	3.78826584172161	7.17306791270458e-11	9.87814424973905e-10	GJA3	chr13	-	20138255	20161049	5211	protein_coding	gap_junction_protein_alpha_3
ENSG00000158458	5.49730390528178	105.740485691512	4.23310884189203	7.23948307001708e-11	9.96461581123822e-10	NRG2	chr5	-	139846779	140043299	4520	protein_coding	neuregulin_2
ENSG00000169607	178.887129505427	1378.89622185655	2.94545488887834	7.30289139794449e-11	1.0046864248868e-09	CKAP2L	chr2	-	112736607	112764677	5219	protein_coding	cytoskeleton_associated_protein_2_like
[truncated: 6,692 more rows]
