# Supplementary material for: A positive feedback loop between ZEB2 and ACSL4 regulates lipid metabolism to promote breast cancer metastasis
Source: eLife. 2023 Dec 11;12:RP87510. doi: 10.7554/eLife.87510 (PMC10712958; doi:10.7554/eLife.87510)
Supplement: Figure 2—source data 1. [file elife-87510-fig2-data1.xlsx]

## Sheet: RNA-SEQ
GeneName	MCF7	EPI	logFC	P.Value	padj
ACSL4	11.3716	2489.45	7.75801	8.3e-38	1.4e-35
ZEB2	0.943449	482.07	8.81204	6.44e-28	4.53e-26
IGFBP5	157009	4.22403	-15.1414	3.51e-86	9.46e-82
KRT19	47206.8	1.05956	-15.2883	7.05e-77	9.51e-73
TFF1	21646.7	1.39e-17	-17.4039	7.74e-70	6.96e-66
GLUL	19846.4	1.39e-17	-17.2787	6.76e-69	4.56e-65
ESR1	18732.5	2.11438	-13.0333	9.97e-66	5.38e-62
DSCAM-AS1	13710	1.39e-17	-16.745	6.86e-65	3.08e-61
ABCB1	60.6678	95003.9	10.6098	1.48e-64	5.71e-61
SULF2	21585.1	6.3337	-11.7076	2.75e-63	9.28e-60
SPDEF	10488.7	1.05956	-13.1182	1.41e-60	4.22e-57
SPTSSB	30123.8	22.1564	-10.4012	2.9e-60	7.82e-57
BMP7	8324.41	1.39e-17	-16.0252	1.72e-59	4.21e-56
NID2	6.63157	13932.4	11.009	3.32e-59	7.46e-56
FLNC	15.1636	21312.2	10.4446	4.45e-59	9.23e-56
PRLR	11791.3	3.1692	-11.8076	6.88e-59	1.32e-55
CDH1	23692.5	18.9919	-10.2757	1.1e-58	1.98e-55
SEMA3D	10.4236	14707.8	10.4447	2.12e-57	3.58e-54
GRHL2	6744.09	1.39e-17	-15.7215	3.22e-57	5.12e-54
KIAA1324	15555.8	11.6079	-10.3733	5.25e-57	7.87e-54
GSTP1	2.8395	9130.77	11.5866	5.56e-57	7.89e-54
MCAM	6.63157	10794.3	10.6408	1.91e-56	2.58e-53
XIST	5915.54	1.39e-17	-15.5324	8.4e-56	1.08e-52
SULF1	9403.24	6.3337	-10.5088	2.68e-54	3.29e-51
FXYD3	8404.05	5.27886	-10.6042	9.63e-54	1.13e-50
PSAT1	2.8395	6684.58	11.1368	1.3e-53	1.46e-50
LPCAT1	7582.13	4.22403	-10.7693	2.42e-53	2.61e-50
FBP1	4540.93	1.39e-17	-15.1509	5.93e-53	6.15e-50
SPARC	6.63157	7738.37	10.1606	7.51e-53	7.5e-50
AXL	14.2156	11490.5	9.6457	7.99e-53	7.7e-50
PRSS21	3.78753	6167.7	10.6209	9.57e-53	8.9e-50
SLITRK6	12935.5	17.937	-9.48456	1.67e-52	1.5e-49
PXDN	4301.09	1.39e-17	-15.0726	2.28e-52	1.98e-49
MUC5B	15003.1	23.2112	-9.32878	4.25e-52	3.58e-49
ATP10A	1.39e-17	4130.79	15.0143	6.26e-52	5.02e-49
SYT10	4704.94	1.05956	-11.9616	6.33e-52	5.02e-49
LXN	4647.11	1.05956	-11.9438	8.61e-52	6.64e-49
GJC1	3.78753	5580.15	10.4764	1.15e-51	8.62e-49
NEFH	11.3716	9012.63	9.61408	1.35e-51	9.85e-49
RET	9392.81	11.6079	-9.64546	1.48e-51	1.05e-48
B2M	3940.85	1.39e-17	-14.9464	1.99e-51	1.37e-48
SYTL5	3937.05	1.39e-17	-14.945	2.04e-51	1.37e-48
MSN	7.57958	7152.93	9.85783	2.41e-51	1.59e-48
SNHG14	2.8395	5323.82	10.8084	3.69e-51	2.37e-48
MYO5C	6571.56	5.27886	-10.2493	4.34e-51	2.72e-48
LAMA1	4.73555	5600.2	10.1689	7.57e-51	4.64e-48
GDA	1.89147	4564.33	11.1413	1.81e-50	1.08e-47
NNMT	7.57958	6311.16	9.6772	5.4e-50	3.16e-47
AREG	16776.8	36.9243	-8.823	5.92e-50	3.4e-47
BCAT1	6.63157	5854.41	9.75813	7.65e-50	4.3e-47
LARGE	3801.49	1.05956	-11.654	1.25e-49	6.87e-47
FBN2	18.0077	9852.29	9.08541	1.44e-49	7.79e-47
UBB	3260.18	1.39e-17	-14.6728	2.17e-49	1.15e-46
S100P	5524.96	5.27886	-9.99907	3.19e-49	1.66e-46
CMBL	3162.54	1.39e-17	-14.629	4.61e-49	2.35e-46
IGF2BP3	1.39e-17	3027.42	14.566	1.37e-48	6.82e-46
TGM2	38.8638	14337.5	8.52238	7.94e-48	3.89e-45
MAP7	2798.5	1.39e-17	-14.4526	9.44e-48	4.54e-45
CLDN1	8.52759	5342.81	9.26957	1.37e-47	6.48e-45
KIRREL	2.8395	3813.28	10.327	1.43e-47	6.64e-45
S100A9	2742.57	1.39e-17	-14.4234	1.55e-47	7.1e-45
IGF2BP2	12.3196	6219.39	8.96464	4.1e-47	1.84e-44
BGN	4.73555	3756.32	9.59276	1.48e-46	6.56e-44
VIM	3.78753	3451.47	9.78336	1.68e-46	7.31e-44
GNAI1	7.57958	4529.52	9.19867	1.99e-46	8.52e-44
ABCC3	7043.66	16.8822	-8.69447	2.49e-46	1.05e-43
RP11-54H7.4	1.89147	3022.15	10.5465	4.88e-46	2.02e-43
AKR1B1	6.63157	4071.72	9.23426	6.14e-46	2.51e-43
VAV3	4791.2	8.44339	-9.12799	7.53e-46	3.03e-43
UCHL1	36.9677	11209.9	8.23927	1.31e-45	5.2e-43
FAM129A	20.8517	7486.26	8.47905	1.47e-45	5.73e-43
CDH2	1.89147	2887.12	10.4805	1.51e-45	5.8e-43
GDF15	4301.09	7.38854	-9.16195	2.9e-45	1.1e-42
CTCFL	1.39e-17	2170.88	14.0862	4.98e-45	1.87e-42
IGFBP2	2162.39	1.39e-17	-14.0806	5.39e-45	1.99e-42
NT5E	4.73555	3210.96	9.36645	7.17e-45	2.61e-42
COL12A1	36.9677	10363.9	8.12607	9.14e-45	3.29e-42
TFPI2	7.57958	3765.81	8.93228	1.91e-44	6.77e-42
DKK3	5.68356	3233.12	9.11952	3.58e-44	1.25e-41
TFF3	1981.32	1.39e-17	-13.9544	4.61e-44	1.6e-41
ETS1	9.4756	4027.42	8.71192	5.52e-44	1.88e-41
ESRP2	5415.94	15.8273	-8.40777	6.71e-44	2.26e-41
PLPP2	1947.19	1.39e-17	-13.9293	7.05e-44	2.35e-41
GPX1	7.57958	3527.42	8.83793	9.55e-44	3.14e-41
CTD-2354A18.1	0.943449	2184.6	10.9918	1.08e-43	3.52e-41
MYL9	2.8395	2650.84	9.8024	1.13e-43	3.62e-41
FMN2	2.8395	2616.03	9.78333	1.57e-43	4.95e-41
BSPRY	1884.63	1.39e-17	-13.8822	1.58e-43	4.95e-41
EPB41L3	3.78753	2608.64	9.37946	1.67e-43	5.18e-41
INA	0.943449	2140.29	10.9623	1.78e-43	5.47e-41
LAYN	0.943449	2130.8	10.9558	2e-43	6.06e-41
SORL1	2350.1	2.11438	-10.0386	2.34e-43	7.01e-41
NDN	0.943449	2116.03	10.9458	2.38e-43	7.05e-41
LY6K	3.78753	2568.56	9.35712	2.45e-43	7.17e-41
SLC17A9	1.89147	2287.97	10.145	4.61e-43	1.34e-40
HR	2023.03	1.05956	-10.744	7e-43	2.01e-40
MSLN	16.1116	4860.75	8.22544	9.75e-43	2.77e-40
PPL	2623.12	3.1692	-9.63933	1.02e-42	2.88e-40
ZCCHC11	0.943449	1978.9	10.8492	1.23e-42	3.42e-40
MYH14	3499.08	8.44339	-8.67459	1.75e-42	4.82e-40
FSTL1	18.9557	5268.97	8.10898	1.78e-42	4.84e-40
UGT2B15	1697.87	1.39e-17	-13.7317	2.01e-42	5.43e-40
AKT3	1.89147	2138.18	10.0473	2.44e-42	6.51e-40
SLFN13	1.39e-17	1675.1	13.7122	2.89e-42	7.65e-40
TUBB2B	3.78753	2316.45	9.20809	3.09e-42	8.1e-40
TRIM58	2.8395	2310.12	9.60393	3.33e-42	8.64e-40
SLFN11	1.39e-17	1630.8	13.6735	5.55e-42	1.42e-39
IRX3	1622.98	1.39e-17	-13.6666	6.07e-42	1.54e-39
ACKR3	10104.8	50.6373	-7.63722	8.48e-42	2.14e-39
RHOD	1578.42	1.39e-17	-13.6264	1.21e-41	3.01e-39
HID1	4332.37	15.8273	-8.08572	1.65e-41	4.08e-39
PPP1R14A	3.78753	2113.92	9.0761	2.93e-41	7.19e-39
BEX1	1.39e-17	1520.04	13.5721	3.11e-41	7.55e-39
PDPN	0.943449	1708.86	10.6375	4.47e-41	1.08e-38
MT1E	0.943449	1706.75	10.6357	4.6e-41	1.1e-38
ARHGAP23	9.4756	3041.13	8.30669	5.6e-41	1.32e-38
LAMC3	1.39e-17	1459.91	13.5138	8.3e-41	1.95e-38
PRAME	10.4236	3110.75	8.20354	1.1e-40	2.56e-38
MSMB	1624.87	1.05956	-10.4278	1.49e-40	3.43e-38
CLDN16	3.78753	1973.63	8.97703	1.57e-40	3.59e-38
PNMAL1	1.39e-17	1399.79	13.4532	2.31e-40	5.24e-38
SLC38A5	3.78753	1937.76	8.95058	2.47e-40	5.55e-38
AGPS	8.52759	2706.75	8.28857	2.62e-40	5.84e-38
FXYD5	0.943449	1580.17	10.5246	3.04e-40	6.73e-38
EHD2	18.9557	4272.14	7.80643	3.11e-40	6.81e-38
BDNF	1.89147	1745.78	9.75481	3.48e-40	7.57e-38
AGR2	1560.41	1.05956	-10.3694	4.03e-40	8.69e-38
RAB25	2207.9	4.22403	-8.98944	4.12e-40	8.81e-38
CA12	1552.83	1.05956	-10.3624	4.49e-40	9.54e-38
DZIP1	0.943449	1549.58	10.4964	4.86e-40	1.02e-37
SELENBP1	2020.19	3.1692	-9.26256	6.18e-40	1.29e-37
NUPR1	2155.76	4.22403	-8.95497	7.46e-40	1.55e-37
GALNT3	1488.36	1.05956	-10.3013	1.27e-39	2.62e-37
FOXA1	10703	70.6794	-7.24007	1.8e-39	3.67e-37
S100A14	3550.27	15.8273	-7.7985	2.19e-39	4.45e-37
OSBPL3	1.89147	1611.81	9.63963	2.45e-39	4.92e-37
FGFBP1	0.943449	1439.87	10.3904	2.92e-39	5.84e-37
ATP2C2	2033.46	4.22403	-8.87072	3.1e-39	6.14e-37
IGFN1	2.8395	1745.78	9.19986	3.16e-39	6.22e-37
TRMT12	1254.2	1.39e-17	-13.2948	3.24e-39	6.34e-37
MYB	3486.75	15.8273	-7.77246	3.43e-39	6.65e-37
DPYSL3	2.8395	1738.39	9.19374	3.49e-39	6.72e-37
SYK	1249.46	1.39e-17	-13.2893	3.57e-39	6.81e-37
PTRF	98.588	13779.5	7.12502	3.59e-39	6.81e-37
ADAMTS1	4.73555	1870.25	8.58672	4.12e-39	7.78e-37
CCDC170	2378.54	7.38854	-8.30736	6.14e-39	1.15e-36
ADAMTS12	2.8395	1697.26	9.15919	6.24e-39	1.16e-36
SIDT1	1385.98	1.05956	-10.1984	7.16e-39	1.32e-36
CEACAM5	1201.12	1.39e-17	-13.2324	9.24e-39	1.7e-36
IQSEC3	1.39e-17	1201.48	13.2328	9.43e-39	1.72e-36
MGA	1181.21	1.39e-17	-13.2083	1.39e-38	2.51e-36
CLDN7	1173.62	1.39e-17	-13.199	1.64e-38	2.94e-36
NRG1	0.943449	1338.61	10.2852	1.72e-38	3.07e-36
BCAS1	1167.94	1.39e-17	-13.192	1.82e-38	3.22e-36
BIN1	12.3196	2742.61	7.78345	2.36e-38	4.16e-36
ALDH3B2	1461.82	2.11438	-9.35371	2.56e-38	4.48e-36
SLC6A15	1.89147	1463.08	9.49996	2.6e-38	4.52e-36
GFRA1	5481.35	35.8694	-7.25084	3.58e-38	6.19e-36
ANPEP	3.78753	1561.18	8.63884	4.85e-38	8.33e-36
NEBL	2517.89	10.5531	-7.88214	6.2e-38	1.06e-35
FGF2	2.8395	1541.14	9.02	6.64e-38	1.13e-35
MAL2	5026.31	33.7597	-7.21296	1.05e-37	1.76e-35
CACNG4	1080.72	1.39e-17	-13.08	1.21e-37	2.01e-35
CCDC88A	17.0597	3126.58	7.50702	1.21e-37	2.01e-35
2023-09-06	6.63157	1841.77	8.08977	1.78e-37	2.92e-35
PDCD10	1053.23	1.39e-17	-13.0428	2.22e-37	3.63e-35
SERPINE1	3.78753	1465.19	8.5473	2.27e-37	3.69e-35
CALD1	6.63157	1777.42	8.03847	4.21e-37	6.8e-35
CALML5	1169.83	1.05956	-9.95386	4.35e-37	6.98e-35
MB	1300.66	2.11438	-9.1852	4.42e-37	7.05e-35
HPGD	1290.23	2.11438	-9.17359	5.32e-37	8.45e-35
WBP5	1.39e-17	1006.33	12.9771	6.85e-37	1.08e-34
PVRL4	1272.22	2.11438	-9.15331	7.48e-37	1.17e-34
HNMT	1135.7	1.05956	-9.91115	9.06e-37	1.41e-34
ST6GALNAC2	2125.42	9.49823	-7.78781	1.21e-36	1.88e-34
AFAP1-AS1	2.8395	1367.09	8.84712	1.22e-36	1.88e-34
IL32	11.3716	2193.03	7.57512	1.84e-36	2.82e-34
HMGA2	1.39e-17	962.026	12.9122	2.06e-36	3.14e-34
PKIB	7338.49	64.3503	-6.83072	3.01e-36	4.56e-34
ADD2	6.63157	1633.96	7.91706	3.28e-36	4.95e-34
SLC43A3	0.943449	1069.62	9.96163	3.93e-36	5.89e-34
F3	20.8517	3084.38	7.19982	4.33e-36	6.45e-34
ABCG1	1061.76	1.05956	-9.81403	4.61e-36	6.83e-34
GATA3	24500.2	252.113	-6.6019	5.24e-36	7.72e-34
SMARCA1	2.8395	1275.32	8.74688	6.48e-36	9.49e-34
FOXG1	1.39e-17	912.449	12.8358	7.26e-36	1.05e-33
CXCL12	911.027	1.39e-17	-12.8336	7.26e-36	1.05e-33
RAB34	4.73555	1369.2	8.13685	8.25e-36	1.19e-33
NRCAM	4894.54	41.1437	-6.89019	1.03e-35	1.48e-33
CPNE7	11.3716	2013.71	7.45206	1.46e-35	2.09e-33
AKAP12	91.004	9164.53	6.65196	1.58e-35	2.25e-33
GJA1	10.4236	1889.24	7.48412	2.14e-35	3.03e-33
DAPK1	7.57958	1602.32	7.69954	2.32e-35	3.26e-33
BRINP3	1103.47	2.11438	-8.94804	2.34e-35	3.27e-33
HS3ST3A1	3.78753	1194.09	8.25216	3.23e-35	4.49e-33
CLMP	13.2676	2113.92	7.30196	3.88e-35	5.36e-33
CD40	1.39e-17	845.993	12.7268	4.53e-35	6.23e-33
EGR3	1365.12	4.22403	-8.29585	4.96e-35	6.78e-33
C5orf38	838.979	1.39e-17	-12.7148	5.22e-35	7.11e-33
GABRB3	1.39e-17	823.841	12.6885	8.52e-35	1.15e-32
TSTD1	817.175	1.39e-17	-12.6768	9.86e-35	1.33e-32
BST2	37.9158	4128.68	6.76187	1e-34	1.34e-32
ELF3	2114.04	13.7176	-7.25533	1.03e-34	1.38e-32
AEBP1	18.9557	2537.97	7.05517	1.05e-34	1.4e-32
ANKRD33B	2.8395	1126.58	8.568	1.3e-34	1.72e-32
PDLIM4	1.39e-17	801.689	12.6492	1.63e-34	2.14e-32
GSDMD	13.2676	1991.56	7.21595	1.64e-34	2.15e-32
OXTR	49.2918	4936.7	6.64231	1.65e-34	2.15e-32
RUNDC3B	4.73555	1179.33	7.9215	2.99e-34	3.88e-32
DEGS2	1259.89	4.22403	-8.18014	3.42e-34	4.41e-32
GNA14	1171.73	3.1692	-8.47677	3.45e-34	4.43e-32
BTG3	4.73555	1165.61	7.90463	3.99e-34	5.1e-32
KYNU	1416.31	6.3337	-7.77788	4.51e-34	5.74e-32
SERPINB7	1.39e-17	759.496	12.5712	5.89e-34	7.46e-32
S100A8	757.45	1.39e-17	-12.5673	6.08e-34	7.66e-32
SIM1	10.4236	1641.35	7.28121	6.48e-34	8.13e-32
CTGF	2.8395	1051.69	8.46876	6.83e-34	8.52e-32
APOBEC3C	0.943449	862.871	9.65179	6.92e-34	8.6e-32
TP53INP1	6454.95	72.7891	-6.46819	7.6e-34	9.4e-32
ARHGAP29	83.4199	7158.21	6.42085	9.2e-34	1.13e-31
RBPMS	1535.76	8.44339	-7.48664	9.42e-34	1.15e-31
BEND4	1.39e-17	741.563	12.5367	1.04e-33	1.27e-31
LINC00472	1.39e-17	736.289	12.5264	1.23e-33	1.49e-31
RAC2	1.39e-17	734.179	12.5223	1.35e-33	1.63e-31
C17orf51	0.943449	837.554	9.60883	1.4e-33	1.68e-31
CDKN2A	87.2119	7249.98	6.3752	1.83e-33	2.2e-31
LINC00707	1.39e-17	723.631	12.5014	1.87e-33	2.24e-31
EYA4	1.39e-17	721.521	12.4972	2e-33	2.38e-31
ANXA1	43.6038	3978.89	6.50755	2.51e-33	2.97e-31
NID1	2.8395	989.452	8.38077	2.94e-33	3.46e-31
GADD45G	707.206	1.39e-17	-12.4683	3.08e-33	3.62e-31
TMEM47	1.39e-17	705.698	12.4652	3.41e-33	3.98e-31
GPR37L1	896.807	2.11438	-8.6489	3.42e-33	3.98e-31
NRIP3	0.943449	804.854	9.55138	3.65e-33	4.23e-31
PPM1E	1371.76	7.38854	-7.51337	3.92e-33	4.52e-31
CDA	2.8395	976.794	8.36219	4.03e-33	4.62e-31
KIAA0040	691.09	1.39e-17	-12.4351	5.31e-33	6.06e-31
SEMA7A	5.68356	1123.42	7.59459	5.55e-33	6.32e-31
HKDC1	1.89147	878.693	8.76447	5.71e-33	6.47e-31
TYRO3	686.35	1.39e-17	-12.4251	6.3e-33	7.09e-31
TMPRSS13	1116.74	4.22403	-8.00615	6.31e-33	7.09e-31
MMP14	27.4877	2707.8	6.61549	6.41e-33	7.17e-31
MICB	12.3196	1636.07	7.03819	6.75e-33	7.52e-31
EMC10	682.558	1.39e-17	-12.4171	7.24e-33	8.03e-31
CBFA2T3	2687.59	26.3758	-6.66446	7.6e-33	8.4e-31
CHRDL1	1.39e-17	680.382	12.4125	8.04e-33	8.84e-31
GPR65	0.943449	777.428	9.50137	8.25e-33	9.04e-31
ZNF208	1.39e-17	679.327	12.4103	8.32e-33	9.08e-31
PCDHB2	664.546	1.39e-17	-12.3786	1.36e-32	1.48e-30
LRP1B	1898.85	16.8822	-6.80334	2.17e-32	2.35e-30
CLIP4	2.8395	907.174	8.25553	2.39e-32	2.58e-30
PTPRD	0.943449	738.399	9.42708	2.81e-32	3.01e-30
GYG2	642.742	1.39e-17	-12.3304	3.02e-32	3.23e-30
CCDC80	28.4357	2603.37	6.51006	3.07e-32	3.27e-30
FGF13	5.68356	1044.3	7.48925	3.19e-32	3.38e-30
CEACAM6	638.95	1.39e-17	-12.3219	3.38e-32	3.57e-30
PLAU	4.73555	964.136	7.63088	3.84e-32	4.04e-30
GNGT2	1.39e-17	632.914	12.3082	4.54e-32	4.77e-30
DLC1	21.7997	2101.26	6.58236	4.77e-32	4.99e-30
IGF2BP1	46.4478	3681.43	6.30455	5.97e-32	6.21e-30
TBX2	3860.27	48.5276	-6.31023	6.38e-32	6.61e-30
NES	27.4877	2453.58	6.47326	6.92e-32	7.15e-30
KCNQ5	0.943449	710.972	9.37248	7.02e-32	7.2e-30
SH3RF3	0.943449	710.972	9.37248	7.02e-32	7.2e-30
MARVELD3	1005.83	4.22403	-7.85526	7.55e-32	7.72e-30
LPAR3	1.39e-17	619.201	12.2766	7.71e-32	7.85e-30
EVC	1.39e-17	617.091	12.2717	8.32e-32	8.44e-30
BMPR1B	1593.59	13.7176	-6.84763	9.55e-32	9.65e-30
TCAM1P	1.39e-17	611.817	12.2593	1.01e-31	1.01e-29
HOXC13	917.663	3.1692	-8.12421	1.2e-31	1.2e-29
TBX18	0.943449	695.15	9.34001	1.2e-31	1.2e-29
SPG11	1449.49	11.6079	-6.94956	1.21e-31	1.21e-29
GREB1	16636.5	258.442	-6.00771	1.23e-31	1.22e-29
MTAP	8.52759	1186.71	7.09905	1.29e-31	1.28e-29
HMGCS2	602.926	1.39e-17	-12.2382	1.32e-31	1.3e-29
GNAO1	3.78753	833.335	7.73327	1.77e-31	1.73e-29
PRKAA2	1.89147	759.496	8.55418	1.83e-31	1.79e-29
GOLIM4	594.394	1.39e-17	-12.2176	1.88e-31	1.83e-29
COL6A1	102.38	6854.41	6.06323	2.16e-31	2.09e-29
IFI16	0.943449	677.217	9.30232	2.17e-31	2.09e-29
DNAJC15	581.122	1.39e-17	-12.1851	3.17e-31	3.05e-29
DHRS2	1075.03	6.3337	-7.38016	3.35e-31	3.22e-29
CD70	3.78753	800.635	7.67553	4.62e-31	4.41e-29
ITGB8	41.7078	3080.16	6.20214	5.01e-31	4.77e-29
ST8SIA6	1179.31	8.44339	-7.10567	5.31e-31	5.04e-29
PDE1C	2.8395	782.702	8.04265	7.92e-31	7.49e-29
CTSZ	223.724	13287.9	5.89143	9.05e-31	8.54e-29
LINC00667	1.89147	709.918	8.4568	9.18e-31	8.63e-29
MPZL3	839.927	3.1692	-7.99653	9.66e-31	9.04e-29
TCEAL8	0.943449	632.914	9.20472	1.1e-30	1.02e-28
CCDC8	1.39e-17	551.69	12.1101	1.15e-30	1.06e-28
CTSC	41.7078	2970.46	6.14982	1.19e-30	1.1e-28
PREX1	38461.4	677.217	-5.8274	1.22e-30	1.13e-28
BCL11A	1.39e-17	545.361	12.0934	1.48e-30	1.36e-28
TDRD1	542.254	1.39e-17	-12.0852	1.61e-30	1.48e-28
EPN3	2478.08	32.7049	-6.23835	1.75e-30	1.6e-28
ENOSF1	1625.82	17.937	-6.49256	2.1e-30	1.91e-28
NEGR1	1.39e-17	536.922	12.0709	2.18e-30	1.98e-28
MMP24-AS1	17.0597	1552.74	6.49731	2.8e-30	2.53e-28
NIPAL2	2251.5	29.5403	-6.24628	3.29e-30	2.97e-28
RP4-568C11.4	522.346	1.39e-17	-12.0313	3.88e-30	3.48e-28
P3H2	1.89147	667.724	8.36842	3.88e-30	3.48e-28
GATA3-AS1	789.683	3.1692	-7.90755	4.25e-30	3.8e-28
DFNA5	4.73555	790.086	7.34369	4.38e-30	3.9e-28
AGA	516.658	1.39e-17	-12.0155	5.08e-30	4.5e-28
LINC01293	1564.2	17.937	-6.43682	5.31e-30	4.68e-28
PWAR5	1.39e-17	516.88	12.0161	5.31e-30	4.68e-28
MX2	14.2156	1341.77	6.54759	5.98e-30	5.26e-28
TMEM200A	1.39e-17	512.661	12.0043	6.37e-30	5.58e-28
GLI2	0.943449	584.391	9.08967	7.02e-30	6.12e-28
RSPO4	3.78753	714.137	7.51061	7.03e-30	6.12e-28
CYR61	199.076	10906.1	5.77475	7.94e-30	6.89e-28
APBA2	4.73555	766.879	7.30069	8.82e-30	7.62e-28
PCSK1N	1.89147	642.407	8.31267	9.53e-30	8.21e-28
ZNF518B	1.39e-17	503.167	11.9773	1.01e-29	8.63e-28
FGB	501.489	1.39e-17	-11.9725	1.01e-29	8.63e-28
CRYL1	1414.42	15.8273	-6.47086	1.06e-29	9.03e-28
PRR15L	759.346	3.1692	-7.85105	1.06e-29	9.03e-28
VGLL3	4.73555	758.441	7.28473	1.13e-29	9.58e-28
CLDN4	4939.09	84.3925	-5.86897	1.19e-29	1e-27
NAALADL2	570.694	1.05956	-8.91852	1.19e-29	1e-27
TM4SF1	9.4756	1035.87	6.75302	1.21e-29	1.01e-27
SLC35F3	1.39e-17	494.729	11.9529	1.47e-29	1.23e-27
IGFBP6	14.2156	1287.97	6.48856	1.59e-29	1.33e-27
ESRP1	7766.99	142.409	-5.76805	1.7e-29	1.41e-27
RBM47	3345.5	54.8567	-5.92731	1.92e-29	1.59e-27
PSG4	1.89147	623.42	8.26939	1.93e-29	1.6e-27
TNC	1.89147	621.31	8.2645	2.08e-29	1.72e-27
NLRP10	1.39e-17	486.29	11.9281	2.14e-29	1.76e-27
PRKCDBP	1.39e-17	486.29	11.9281	2.14e-29	1.76e-27
UGT8	1.89147	619.201	8.2596	2.33e-29	1.9e-27
ZNF677	0.943449	553.8	9.01212	2.52e-29	2.05e-27
PRSS22	786.838	4.22403	-7.50106	2.55e-29	2.08e-27
ARSD	2208.84	32.7049	-6.07243	2.74e-29	2.22e-27
XBP1	107264	2194.09	-5.61132	2.92e-29	2.36e-27
TINAGL1	1.39e-17	476.796	11.8996	3.47e-29	2.79e-27
ST14	3746.51	64.3503	-5.86081	3.56e-29	2.86e-27
C9orf152	1038.06	9.49823	-6.75405	3.68e-29	2.95e-27
PLCB2	4.73555	720.466	7.21064	3.8e-29	3.03e-27
MEI1	10.4236	1035.87	6.61723	4.03e-29	3.21e-27
GRAMD1B	4.73555	717.302	7.20429	4.19e-29	3.32e-27
IRX2	471.153	1.39e-17	-11.8825	4.22e-29	3.34e-27
S100A7	467.361	1.39e-17	-11.8708	5.14e-29	4.06e-27
CCDC64B	1309.19	15.8273	-6.35934	6.65e-29	5.23e-27
RP11-54O7.3	1402.09	17.937	-6.27899	7.18e-29	5.63e-27
NLRX1	4.73555	700.424	7.16994	7.36e-29	5.76e-27
GNB4	48.3438	2827	5.86601	7.75e-29	6.04e-27
TRHDE	1.39e-17	458.864	11.8444	8.48e-29	6.57e-27
FGF5	1.39e-17	458.864	11.8444	8.48e-29	6.57e-27
DPYD	1.39e-17	457.809	11.841	8.92e-29	6.89e-27
C10orf54	1.89147	583.336	8.17353	9.12e-29	7.03e-27
PCDHB8	454.089	1.39e-17	-11.8293	9.87e-29	7.57e-27
HPCAL4	1.89147	581.226	8.16831	9.89e-29	7.57e-27
PCDHB3	452.193	1.39e-17	-11.8233	1.09e-28	8.35e-27
STEAP1B	1.39e-17	450.425	11.8176	1.27e-28	9.68e-27
MSX2	449.349	1.39e-17	-11.8142	1.27e-28	9.68e-27
RP11-459E5.1	448.401	1.39e-17	-11.8111	1.34e-28	1.02e-26
MYRF	18.9557	1405.06	6.20218	1.58e-28	1.19e-26
PCDHB13	443.661	1.39e-17	-11.7958	1.74e-28	1.31e-26
TTC39A	2953.97	52.747	-5.8042	1.81e-28	1.36e-26
MACC1	507.177	1.05956	-8.74833	1.82e-28	1.36e-26
TWIST2	0.943449	507.387	8.88587	1.9e-28	1.42e-26
GREM1	1.39e-17	441.986	11.7903	2.03e-28	1.51e-26
BFSP2	439.869	1.39e-17	-11.7834	2.03e-28	1.51e-26
MT1L	1.39e-17	440.931	11.7869	2.14e-28	1.59e-26
MAGI2-AS3	1.89147	562.239	8.1204	2.15e-28	1.59e-26
TMC4	2154.81	35.8694	-5.90392	2.37e-28	1.74e-26
SMIM14	16901.9	366.037	-5.52859	2.49e-28	1.83e-26
SIPA1	53.0838	2911.39	5.77384	2.59e-28	1.9e-26
SLC1A2	499.593	1.05956	-8.7266	2.63e-28	1.92e-26
RAB3B	53.0838	2908.22	5.77227	2.65e-28	1.93e-26
DCHS1	0.943449	500.003	8.86472	2.75e-28	2e-26
THSD1	5.68356	712.027	6.93679	2.87e-28	2.08e-26
ETV1	0.943449	496.838	8.85557	3.16e-28	2.29e-26
SLC9A7P1	1.39e-17	432.492	11.759	3.27e-28	2.36e-26
EYA2	429.441	1.39e-17	-11.7488	3.64e-28	2.62e-26
LRCH2	1.39e-17	429.328	11.7484	3.84e-28	2.75e-26
PBX1	4077.36	80.1731	-5.66626	4.27e-28	3.06e-26
ABCA12	543.202	2.11438	-7.92572	4.58e-28	3.27e-26
TWIST1	1.89147	543.252	8.07085	4.78e-28	3.4e-26
ADAMTS5	1.39e-17	422.999	11.727	5.6e-28	3.98e-26
AC003092.1	0.943449	484.18	8.81834	5.85e-28	4.14e-26
CPNE8	1.39e-17	421.944	11.7234	5.92e-28	4.18e-26
FRK	3232.69	62.2406	-5.69601	6.45e-28	4.53e-26
ABCC11	731.854	5.27886	-7.08296	6.81e-28	4.77e-26
CRYBG3	2.8395	584.391	7.62119	7.56e-28	5.28e-26
RP11-438D14.2	415.221	1.39e-17	-11.7002	7.79e-28	5.43e-26
LINC00992	413.325	1.39e-17	-11.6936	8.7e-28	6.04e-26
CDIP1	31.2797	1818.56	5.85558	9.59e-28	6.65e-26
ABI3	1.89147	524.264	8.01953	1.09e-27	7.56e-26
FAM126A	18.0077	1251.05	6.10821	1.11e-27	7.64e-26
ZNF655	0.943449	469.412	8.77367	1.15e-27	7.94e-26
ZIC4	406.689	1.39e-17	-11.6703	1.29e-27	8.82e-26
HPDL	3.78753	570.678	7.18715	1.33e-27	9.1e-26
NXPH3	2292.27	42.1985	-5.75942	1.4e-27	9.59e-26
PPP1R16B	1.39e-17	406.121	11.6682	1.44e-27	9.8e-26
ANTXR2	1.89147	517.935	8.00202	1.49e-27	1.01e-25
ACTC1	1.39e-17	405.066	11.6645	1.52e-27	1.03e-25
MIER2	402.897	1.39e-17	-11.6568	1.52e-27	1.03e-25
DMD	0.943449	464.138	8.75737	1.55e-27	1.05e-25
MKX	1.89147	516.88	7.99907	1.56e-27	1.05e-25
CHST13	1.39e-17	404.012	11.6607	1.61e-27	1.08e-25
ID4	461.673	1.05956	-8.61275	1.63e-27	1.09e-25
MFAP5	1.39e-17	402.957	11.657	1.71e-27	1.14e-25
MAGEL2	1.39e-17	400.847	11.6494	1.91e-27	1.27e-25
PAX8	82.4719	3870.24	5.55016	1.92e-27	1.27e-25
SDR42E1	398.157	1.39e-17	-11.6397	2.03e-27	1.34e-25
HSH2D	694.882	5.27886	-7.00818	2.29e-27	1.51e-25
PCLO	11.3716	912.449	6.31012	2.49e-27	1.64e-25
CPVL	5.68356	643.462	6.79074	3.01e-27	1.98e-25
DCAF12L1	1.39e-17	392.408	11.6187	3.04e-27	1.99e-25
CRYAB	0.943449	448.315	8.70734	3.32e-27	2.17e-25
PLTP	19.9037	1275.32	5.99248	3.36e-27	2.2e-25
SLC2A3	2.8395	546.416	7.52428	3.61e-27	2.35e-25
AC018804.7	388.677	1.39e-17	-11.605	3.62e-27	2.35e-25
RP11-598F7.4	1.39e-17	387.134	11.5992	4.32e-27	2.8e-25
CREB5	1.39e-17	386.079	11.5953	4.58e-27	2.96e-25
IL20RA	383.937	1.39e-17	-11.5873	4.58e-27	2.96e-25
C14orf132	18595.1	458.864	-5.34034	4.83e-27	3.11e-25
MYO5B	1648.57	29.5403	-5.79664	5.49e-27	3.53e-25
IQGAP2	0.943449	436.712	8.66952	6.19e-27	3.97e-25
LGALS3BP	165.896	6909.26	5.37908	7.54e-27	4.82e-25
ELAVL2	1.39e-17	376.586	11.5593	7.86e-27	5.01e-25
CSPG4	49.2918	2364.97	5.58063	8.01e-27	5.1e-25
FAM214A	4360.81	100.215	-5.44174	8.83e-27	5.6e-25
SNCA	1.39e-17	372.366	11.5431	1e-26	6.35e-25
STXBP6	3.78753	522.155	7.05898	1.07e-26	6.74e-25
TMPRSS2	369.717	1.39e-17	-11.5328	1.13e-26	7.14e-25
MRI1	423.753	1.05956	-8.48914	1.17e-26	7.38e-25
PCSK9	1.89147	472.577	7.86982	1.22e-26	7.66e-25
APH1B	470.205	2.11438	-7.71758	1.28e-26	8.03e-25
RNF217	0.943449	422.999	8.6235	1.31e-26	8.17e-25
CXXC5	6995.31	173	-5.33657	1.4e-26	8.69e-25
ZEB1	1.89147	469.412	7.86013	1.41e-26	8.79e-25
SDHAF3	1.39e-17	367.092	11.5225	1.45e-26	8.99e-25
NLRP1	3.78753	512.661	7.03251	1.6e-26	9.85e-25
ITPRIPL1	3.78753	512.661	7.03251	1.6e-26	9.85e-25
PLAC8	30.3317	1574.89	5.69226	1.65e-26	1.01e-24
RP11-332H18.5	360.237	1.39e-17	-11.4954	1.98e-26	1.22e-24
KRT7	159.26	6352.3	5.31668	2.14e-26	1.31e-24
C1QL1	26.5397	1402.95	5.71729	2.28e-26	1.4e-24
LINC00162	3.78753	502.112	7.00252	2.63e-26	1.61e-24
LYPD3	1280.75	22.1564	-5.84546	2.64e-26	1.61e-24
C17orf82	582.07	4.22403	-7.06627	2.93e-26	1.78e-24
C15orf52	64.4599	2786.91	5.4313	3.01e-26	1.82e-24
HOTAIR	659.806	6.3337	-6.67601	3.37e-26	2.04e-24
PNMA3	4.73555	539.032	6.79216	3.38e-26	2.04e-24
LPL	1.39e-17	352.324	11.4633	3.51e-26	2.11e-24
FBLN2	39.8118	1851.26	5.53459	3.68e-26	2.21e-24
POU4F1	0.943449	404.012	8.55727	3.75e-26	2.25e-24
LINC01291	1148.98	20.0467	-5.83237	3.8e-26	2.27e-24
NAP1L3	1.39e-17	350.214	11.4546	4e-26	2.38e-24
NRK	18.0077	1073.84	5.88787	4.02e-26	2.39e-24
2023-03-04	1.89147	448.315	7.79381	4.05e-26	2.4e-24
RUNX3	0.943449	400.847	8.54593	4.44e-26	2.63e-24
HSPB8	346.965	1.39e-17	-11.4412	4.55e-26	2.69e-24
HIST2H2BE	1066.5	17.937	-5.88434	4.59e-26	2.71e-24
CAPN8	346.017	1.39e-17	-11.4373	4.85e-26	2.86e-24
RBBP8NL	345.069	1.39e-17	-11.4333	5.18e-26	3.04e-24
MPV17L	1.39e-17	347.05	11.4416	5.18e-26	3.04e-24
FLG	1.39e-17	345.995	11.4372	5.53e-26	3.24e-24
PDE4D	4.73555	526.374	6.75788	5.69e-26	3.32e-24
GPR3	1.89147	441.986	7.7733	5.81e-26	3.38e-24
ZNF703	9459.17	254.223	-5.21688	6.43e-26	3.73e-24
MATK	392.469	1.05956	-8.37853	6.64e-26	3.85e-24
ARL10	10.4236	755.276	6.16153	6.65e-26	3.85e-24
KNDC1	599.134	5.27886	-6.79434	7.2e-26	4.16e-24
TMEM150C	1298.76	24.2661	-5.73506	7.23e-26	4.16e-24
ZG16B	596.29	5.27886	-6.78747	8.08e-26	4.65e-24
EPB41L2	161.156	6074.88	5.2352	8.12e-26	4.66e-24
TP73-AS1	0.943449	389.244	8.50356	8.38e-26	4.8e-24
LCN2	474.945	3.1692	-7.1742	8.54e-26	4.88e-24
ESPNL	1.39e-17	338.611	11.4061	8.78e-26	5.01e-24
FAM110C	432.285	2.11438	-7.59631	8.82e-26	5.01e-24
TRABD2A	1.89147	433.547	7.7455	8.82e-26	5.01e-24
BATF	336.537	1.39e-17	-11.3972	9.39e-26	5.32e-24
PIEZO2	7.57958	629.749	6.35239	1.03e-25	5.8e-24
CACNA2D1	0.943449	386.079	8.49179	1.06e-25	5.98e-24
FAXDC2	2151.96	49.5825	-5.43627	1.07e-25	6.01e-24
CD74	9.4756	700.424	6.18857	1.17e-25	6.58e-24
TFCP2	0.943449	383.969	8.48388	1.19e-25	6.69e-24
SPOCK1	14.2156	880.803	5.94041	1.24e-25	6.91e-24
RP11-88H9.2	331.797	1.39e-17	-11.3768	1.31e-25	7.34e-24
CCDC144A	3.78753	467.302	6.8989	1.32e-25	7.37e-24
MEIOC	13.2676	836.499	5.9646	1.54e-25	8.58e-24
AFAP1L1	1.89147	422.999	7.70997	1.59e-25	8.81e-24
ELMO3	1288.33	25.3209	-5.66234	1.64e-25	9.07e-24
ITGA4	4.73555	503.167	6.69285	1.67e-25	9.2e-24
M1AP	1.89147	420.889	7.70276	1.77e-25	9.75e-24
MAPRE2	32.2277	1491.56	5.52672	1.78e-25	9.8e-24
ANO5	1.39e-17	328.062	11.3604	1.85e-25	1.02e-23
TPTEP1	1.89147	419.834	7.69914	1.87e-25	1.02e-23
PRR15	417.117	2.11438	-7.54479	1.97e-25	1.08e-23
RBM23	1687.44	37.9791	-5.46904	2.01e-25	1.1e-23
SLITRK5	11.3716	753.166	6.03338	2.25e-25	1.22e-23
MYO7B	1.89147	415.615	7.68457	2.32e-25	1.26e-23
BAMBI	6533.64	182.493	-5.16105	2.43e-25	1.32e-23
S1PR1	1.39e-17	323.843	11.3417	2.44e-25	1.32e-23
GABRA5	1.39e-17	323.843	11.3417	2.44e-25	1.32e-23
ARL4D	15.1636	889.242	5.86184	2.47e-25	1.33e-23
ELOVL4	29.3837	1357.59	5.52369	3.01e-25	1.62e-23
AC003973.3	1.39e-17	319.624	11.3228	3.22e-25	1.73e-23
LOXL2	54.0318	2183.54	5.33335	3.37e-25	1.8e-23
APBB1	16.1116	909.284	5.80722	3.58e-25	1.92e-23
IL18	90.056	3353.37	5.21663	3.91e-25	2.09e-23
ZBTB18	7.57958	593.884	6.26781	4e-25	2.13e-23
ITGAX	1.39e-17	314.349	11.2988	4.59e-25	2.44e-23
CXADR	16.1116	896.626	5.787	5.01e-25	2.66e-23
RP11-416I2.1	1.39e-17	311.185	11.2842	5.69e-25	3.01e-23
CSDC2	1.39e-17	311.185	11.2842	5.69e-25	3.01e-23
ARNT2	546.046	5.27886	-6.66051	6.06e-25	3.2e-23
SLAIN1	1.39e-17	309.075	11.2744	7.07e-25	3.72e-23
TMBIM1	36.9677	1564.34	5.39822	7.43e-25	3.91e-23
TRIM55	1.89147	393.463	7.60558	8e-25	4.2e-23
IRF6	305.253	1.39e-17	-11.2565	8.17e-25	4.28e-23
CLDN11	1.89147	392.408	7.60171	8.47e-25	4.43e-23
TRO	2.8395	430.383	7.17998	8.69e-25	4.53e-23
RCN3	10.4236	674.053	5.99741	9.52e-25	4.95e-23
FAM174B	1989.85	50.6373	-5.29299	9.74e-25	5.06e-23
TPO	301.461	1.39e-17	-11.2385	1.1e-24	5.68e-23
TMEM125	346.017	1.05956	-8.19685	1.11e-24	5.74e-23
CREB3L4	2542.54	68.5697	-5.2101	1.15e-24	5.95e-23
PRDM6	385.833	2.11438	-7.43235	1.2e-24	6.19e-23
ILDR1	344.121	1.05956	-8.18893	1.26e-24	6.5e-23
ZNF558	299.565	1.39e-17	-11.2294	1.27e-24	6.53e-23
SCNN1A	1903.59	48.5276	-5.2903	1.3e-24	6.65e-23
ZNF300	0.943449	344.94	8.32929	1.35e-24	6.9e-23
UBE2E2	15.1636	827.006	5.75718	1.36e-24	6.93e-23
FLRT2	1.39e-17	299.582	11.2294	1.37e-24	6.98e-23
DENND5B	44.5518	1742.61	5.28555	1.39e-24	7.07e-23
AC144450.2	297.669	1.39e-17	-11.2202	1.48e-24	7.49e-23
HNRNPA1P8	1.39e-17	297.472	11.2192	1.59e-24	8.06e-23
RAI14	205.712	6704.62	5.02558	1.63e-24	8.26e-23
LAMB1	78.6799	2779.53	5.1404	1.7e-24	8.58e-23
GAS7	1.89147	380.805	7.55842	1.71e-24	8.62e-23
LYNX1	520.45	5.27886	-6.59126	1.85e-24	9.26e-23
TCEAL2	1.39e-17	295.362	11.209	1.85e-24	9.26e-23
CCNYL2	1.39e-17	295.362	11.209	1.85e-24	9.26e-23
ZFPM2	0.943449	339.666	8.30707	1.87e-24	9.37e-23
ARMCX4	1.89147	378.695	7.5504	1.93e-24	9.62e-23
SLITRK4	2.8395	415.615	7.12963	1.94e-24	9.69e-23
LONRF3	1.39e-17	294.307	11.2038	1.99e-24	9.91e-23
CAMK4	0.943449	338.611	8.30258	2e-24	9.94e-23
C16orf62	1000.14	21.1016	-5.5587	2.03e-24	1e-22
CYP1B1	5301.23	161.396	-5.03661	2.27e-24	1.13e-22
SYBU	2647.77	74.8988	-5.14145	2.38e-24	1.17e-22
METTL7A	1419.16	34.8146	-5.34436	2.64e-24	1.3e-22
CASC9	289.137	1.39e-17	-11.1783	2.7e-24	1.33e-22
GNG11	1.39e-17	291.143	11.1882	2.7e-24	1.33e-22
ARSI	1.39e-17	290.088	11.183	2.92e-24	1.43e-22
TUBB6	539.41	16578	4.94141	2.96e-24	1.45e-22
RP11-7K24.3	286.293	1.39e-17	-11.1641	3.4e-24	1.66e-22
RP11-326C3.2	8.52759	572.787	6.04832	3.49e-24	1.7e-22
SLFN12	1.39e-17	285.869	11.1619	3.97e-24	1.93e-22
NOV	2.8395	402.957	7.08502	3.99e-24	1.94e-22
RAP1GAP2	185.804	5848.08	4.97514	4.19e-24	2.03e-22
CRB3	468.309	4.22403	-6.75262	4.3e-24	2.08e-22
SLC37A1	1506.37	39.034	-5.26589	4.52e-24	2.18e-22
PTGER1	5.68356	467.302	6.32934	4.74e-24	2.29e-22
PRDM13	1.39e-17	282.704	11.1458	5.02e-24	2.42e-22
NTNG1	0.943449	323.843	8.23827	5.52e-24	2.65e-22
ANKRD1	3.78753	395.573	6.65855	5.94e-24	2.85e-22
TMEM101	526.138	6.3337	-6.34948	5.96e-24	2.86e-22
MGP	278.709	1.39e-17	-11.1253	6.35e-24	3.04e-22
PVRL3	44.5518	1631.86	5.19081	6.43e-24	3.07e-22
SMC1B	6.63157	493.674	6.19056	6.5e-24	3.1e-22
C5	617.146	9.49823	-6.00396	6.74e-24	3.21e-22
CELSR2	35881.9	1238.4	-4.85658	7.6e-24	3.61e-22
LAD1	1645.73	44.3082	-5.21121	7.87e-24	3.73e-22
ZNF788	4.73555	424.054	6.44612	8.22e-24	3.89e-22
HBQ1	3.78753	389.244	6.63529	8.38e-24	3.96e-22
STARD10	14725.3	500.003	-4.87989	8.49e-24	4e-22
PCDHGA2	273.969	1.39e-17	-11.1006	8.74e-24	4.11e-22
GPC3	5.68356	453.589	6.28638	9.45e-24	4.44e-22
CDH11	1.39e-17	274.265	11.1021	9.47e-24	4.44e-22
PTPRM	124.184	3887.12	4.96669	1.03e-23	4.82e-22
C3	1539.55	41.1437	-5.22161	1.04e-23	4.86e-22
PSMG3-AS1	1740.53	48.5276	-5.16111	1.04e-23	4.86e-22
AP4B1-AS1	349.809	2.11438	-7.29099	1.09e-23	5.05e-22
BVES	6.63157	483.125	6.15941	1.09e-23	5.05e-22
CASP4	23.6957	989.452	5.37626	1.09e-23	5.05e-22
PDCD6IPP2	0.943449	312.24	8.18565	1.19e-23	5.53e-22
IL1RL2	1.39e-17	271.101	11.0854	1.31e-23	6.06e-22
CRISPLD1	3.78753	381.86	6.60766	1.34e-23	6.18e-22
CNTD1	7.57958	506.332	6.03777	1.5e-23	6.93e-22
C1orf210	266.385	1.39e-17	-11.0601	1.67e-23	7.7e-22
UCA1	10.4236	593.884	5.81477	1.73e-23	7.96e-22
SAMD9	1.89147	342.83	7.40691	1.82e-23	8.35e-22
ZNF426	7.57958	501.058	6.02266	1.97e-23	9.02e-22
TMEM246	1.39e-17	265.826	11.057	1.97e-23	9.02e-22
TBX2-AS1	1073.14	26.3758	-5.34009	2.1e-23	9.59e-22
RP11-357H14.17	1.39e-17	263.717	11.0456	2.33e-23	1.06e-21
ENTPD2	337.485	2.11438	-7.23927	2.37e-23	1.08e-21
FOSL1	115.652	3502.1	4.9188	2.38e-23	1.08e-21
LDHB	513.814	14433.5	4.81168	2.43e-23	1.1e-21
RNF223	335.589	2.11438	-7.23114	2.7e-23	1.22e-21
WIPF1	3.78753	369.202	6.55905	2.74e-23	1.24e-21
PWAR6	0.943449	300.636	8.13104	2.85e-23	1.28e-21
KDF1	299.565	1.05956	-7.98896	2.85e-23	1.28e-21
CDK6	43.6038	1498.94	5.0992	3.03e-23	1.36e-21
POPDC3	1.89147	334.392	7.37097	3.09e-23	1.38e-21
MAFB	258.801	1.39e-17	-11.0185	3.26e-23	1.46e-21
ZNF667-AS1	1.39e-17	258.442	11.0164	3.55e-23	1.59e-21
IL7R	3.78753	364.982	6.54247	3.72e-23	1.66e-21
TFAP2C	3972.13	135.025	-4.87738	3.75e-23	1.67e-21
WNT5A	32.2277	1180.38	5.18918	4.08e-23	1.81e-21
DAW1	1.39e-17	256.333	11.0046	4.21e-23	1.87e-21
BTC	597.238	10.5531	-5.80654	4.34e-23	1.92e-21
CHST2	0.943449	294.307	8.10035	4.46e-23	1.97e-21
FGG	254.061	1.39e-17	-10.9918	4.58e-23	2.03e-21
FOXP1	2486.61	80.1731	-4.95283	4.83e-23	2.13e-21
P2RY1	5.68356	421.944	6.18207	4.93e-23	2.17e-21
SLC4A10	252.165	1.39e-17	-10.981	5.44e-23	2.39e-21
SERPINE2	39.8118	1351.27	5.08043	5.66e-23	2.49e-21
APCDD1L	2.8395	356.543	6.90852	6.11e-23	2.68e-21
PSMB8	1.89147	323.843	7.32474	6.5e-23	2.83e-21
CARD11	0.943449	290.088	8.07953	6.5e-23	2.83e-21
IL12RB2	0.943449	290.088	8.07953	6.5e-23	2.83e-21
RP11-473M20.5	354.549	3.1692	-6.75256	6.51e-23	2.83e-21
CXorf57	0.943449	289.033	8.07428	7.02e-23	3.05e-21
KCNS3	287.241	1.05956	-7.92838	7.02e-23	3.05e-21
TRHDE-AS1	1.39e-17	251.059	10.9746	7.06e-23	3.06e-21
PDE6B	4.73555	383.969	6.30291	7.67e-23	3.32e-21
BRINP2	248.373	1.39e-17	-10.9592	7.7e-23	3.33e-21
EMP1	177.272	4945.13	4.80095	7.94e-23	3.42e-21
RP11-554I8.2	1.39e-17	248.949	10.9625	8.41e-23	3.62e-21
TTC6	437.973	5.27886	-6.34241	8.96e-23	3.85e-21
SLIT1	848.459	21.1016	-5.32145	8.98e-23	3.85e-21
PLAT	18.0077	768.989	5.40619	9.2e-23	3.94e-21
SESN3	22.7477	874.474	5.25665	9.37e-23	4.01e-21
ZNF667	0.943449	284.814	8.05307	9.55e-23	4.08e-21
FBLN1	73.9399	2232.06	4.91344	9.72e-23	4.15e-21
HCAR1	790.631	18.9919	-5.37068	1.02e-22	4.37e-21
KCTD12	26.5397	971.52	5.18719	1.16e-22	4.92e-21
PRKCQ	0.943449	281.649	8.03696	1.21e-22	5.12e-21
ITGA1	1.89147	313.295	7.27698	1.3e-22	5.53e-21
OVOL1	242.685	1.39e-17	-10.9258	1.31e-22	5.53e-21
L3MBTL4	1.39e-17	243.675	10.9316	1.31e-22	5.53e-21
PCDH17	1.39e-17	243.675	10.9316	1.31e-22	5.53e-21
RASIP1	27.4877	990.507	5.16472	1.36e-22	5.75e-21
REC8	61.6158	1863.92	4.91597	1.41e-22	5.92e-21
CTSF	13.2676	620.256	5.53317	1.48e-22	6.23e-21
XG	341.277	3.1692	-6.69753	1.49e-22	6.26e-21
S100A2	29.3837	1037.98	5.13645	1.52e-22	6.36e-21
DENND2D	1164.14	33.7597	-5.10285	1.54e-22	6.45e-21
ZNF542P	1.39e-17	241.565	10.919	1.57e-22	6.54e-21
DOK7	3046.88	107.599	-4.82204	1.59e-22	6.61e-21
MME	26.5397	957.807	5.16668	1.61e-22	6.71e-21
AHSG	0.943449	277.43	8.01519	1.65e-22	6.86e-21
WNK3	6.63157	427.218	5.98203	1.67e-22	6.93e-21
SAMD11	747.022	17.937	-5.37075	1.68e-22	6.94e-21
MUC1	3166.33	112.873	-4.80856	1.68e-22	6.94e-21
SPATA18	239.841	1.39e-17	-10.9088	1.71e-22	7.07e-21
AC144450.1	239.841	1.39e-17	-10.9088	1.71e-22	7.07e-21
HLA-B	153.572	4175.09	4.76365	1.73e-22	7.12e-21
NINJ1	4072.62	149.793	-4.7638	1.99e-22	8.2e-21
ADRB2	0.943449	274.265	7.99864	2.1e-22	8.61e-21
SV2A	3.78753	336.501	6.42529	2.21e-22	9.05e-21
TNNC1	7.57958	449.37	5.86563	2.23e-22	9.14e-21
KRTCAP3	304.305	2.11438	-7.09002	2.31e-22	9.42e-21
IRX4	304.305	2.11438	-7.09002	2.31e-22	9.42e-21
CAPN9	234.152	1.39e-17	-10.8742	2.7e-22	1.1e-20
DISP2	16.1116	680.382	5.3889	2.82e-22	1.15e-20
WNT5B	1.89147	302.746	7.22759	2.87e-22	1.17e-20
VWA1	469.257	7.38854	-5.96606	2.99e-22	1.21e-20
ZADH2	1130.02	33.7597	-5.05993	3.04e-22	1.23e-20
SLC6A17	1.89147	301.691	7.22256	3.09e-22	1.25e-20
PLCE1	14.2156	624.475	5.44431	3.32e-22	1.34e-20
FHAD1	6.63157	414.56	5.93865	3.33e-22	1.34e-20
IKZF3	5.68356	387.134	6.05789	3.44e-22	1.39e-20
ZNF883	1.39e-17	233.126	10.8678	3.57e-22	1.43e-20
CTPS2	1958.57	67.5149	-4.85598	3.66e-22	1.47e-20
LONRF2	1614.45	53.8019	-4.90413	3.66e-22	1.47e-20
RP11-395N3.2	266.385	1.05956	-7.81968	3.69e-22	1.48e-20
UGT2B17	230.36	1.39e-17	-10.8506	3.92e-22	1.56e-20
FAM135A	23.6957	843.883	5.14671	4.23e-22	1.68e-20
PNMA2	9.4756	489.454	5.67162	4.23e-22	1.68e-20
PGM5P2	2.8395	327.008	6.78382	4.31e-22	1.71e-20
IQCA1	6.63157	409.286	5.92018	4.37e-22	1.74e-20
CAND2	9.4756	487.345	5.66539	4.64e-22	1.84e-20
SATB1	1.39e-17	229.962	10.8481	4.72e-22	1.87e-20
ZNF215	1.39e-17	229.962	10.8481	4.72e-22	1.87e-20
AMZ1	788.735	21.1016	-5.21616	4.77e-22	1.88e-20
ITM2A	1.89147	294.307	7.18682	5.18e-22	2.04e-20
TUBB2A	43.6038	1324.89	4.92114	5.18e-22	2.04e-20
MYT1	1.39e-17	228.907	10.8414	5.19e-22	2.04e-20
EPHB1	8.52759	457.809	5.72514	5.62e-22	2.2e-20
PDGFRB	3.78753	322.788	6.36529	5.66e-22	2.22e-20
KIAA1324L	4.73555	350.214	6.1702	5.7e-22	2.23e-20
DSCAM	226.568	1.39e-17	-10.8267	5.71e-22	2.23e-20
PLA2G4A	0.943449	261.607	7.9305	6.06e-22	2.36e-20
2023-09-10	332.745	8233.1	4.62841	6.11e-22	2.38e-20
LRRC15	9.4756	482.07	5.6497	6.12e-22	2.38e-20
C9orf3	1409.68	46.4179	-4.92094	6.2e-22	2.41e-20
BCL2L15	225.62	1.39e-17	-10.8206	6.28e-22	2.43e-20
RGS6	225.62	1.39e-17	-10.8206	6.28e-22	2.43e-20
ANKLE1	0.943449	260.552	7.92468	6.58e-22	2.55e-20
SYTL2	8010.62	323.843	-4.62804	6.66e-22	2.57e-20
DPYSL5	289.137	2.11438	-7.01629	6.99e-22	2.7e-20
CT45A10	1.39e-17	224.687	10.8146	7.6e-22	2.93e-20
C5AR2	222.776	1.39e-17	-10.8023	8.36e-22	3.21e-20
DLL3	1.39e-17	223.632	10.8078	8.36e-22	3.21e-20
GABRG3	1.89147	287.978	7.15547	8.78e-22	3.37e-20
KRT17	9.4756	472.577	5.62101	9.35e-22	3.58e-20
GALNT7	1876.09	67.5149	-4.79392	9.76e-22	3.73e-20
HOXC11	1025.74	31.65	-5.01302	1e-21	3.82e-20
ALG1L	284.397	2.11438	-6.99245	1.02e-21	3.9e-20
NPNT	2689.48	102.325	-4.71447	1.06e-21	4.02e-20
POU3F3	1.39e-17	220.468	10.7873	1.12e-21	4.25e-20
ECM1	21.7997	759.496	5.11436	1.15e-21	4.36e-20
EPHA1	612.406	14.7725	-5.36212	1.23e-21	4.66e-20
TMEM64	9165.29	383.969	-4.57669	1.31e-21	4.96e-20
PRODH	2055.27	77.0085	-4.736	1.4e-21	5.29e-20
MPPED2	632.314	15.8273	-5.30953	1.42e-21	5.37e-20
ANXA9	2258.14	85.4473	-4.72201	1.47e-21	5.56e-20
MCTP2	4.73555	335.446	6.10806	1.5e-21	5.65e-20
SCUBE2	725.218	20.0467	-5.16861	1.52e-21	5.72e-20
SLC16A1	236.996	5718.34	4.5919	1.59e-21	5.97e-20
C1R	28.4357	912.449	4.99762	1.6e-21	5.98e-20
NOS2	3.78753	306.966	6.29281	1.74e-21	6.5e-20
FABP5	41.7078	1203.59	4.84656	1.96e-21	7.34e-20
CADM1	303.357	3.1692	-6.52768	2e-21	7.48e-20
PSG9	11.3716	503.167	5.45157	2.15e-21	8.01e-20
TSHZ1	429.441	7.38854	-5.83818	2.19e-21	8.14e-20
DENND2A	5.68356	355.489	5.9349	2.2e-21	8.19e-20
NOVA1	1.89147	275.32	7.09065	2.23e-21	8.28e-20
STK33	1.39e-17	212.029	10.731	2.73e-21	1.01e-19
DUSP4	6964.98	298.527	-4.54363	2.8e-21	1.04e-19
FAM65C	471.153	9.49823	-5.61464	2.98e-21	1.1e-19
PARP11	209.504	1.39e-17	-10.7138	3.02e-21	1.11e-19
C7orf31	1.39e-17	210.974	10.7238	3.02e-21	1.11e-19
SYCP1	1.39e-17	210.974	10.7238	3.02e-21	1.11e-19
HRASLS	1.39e-17	210.974	10.7238	3.02e-21	1.11e-19
SNAP25	1.39e-17	210.974	10.7238	3.02e-21	1.11e-19
ALDH1L2	73.9399	1919.83	4.69605	3.08e-21	1.13e-19
SLC35G2	3.78753	298.527	6.25261	3.1e-21	1.14e-19
PIK3IP1	422.805	7.38854	-5.81571	3.15e-21	1.15e-19
HIST1H3E	492.957	10.5531	-5.52976	3.21e-21	1.17e-19
RP11-483P21.2	208.556	1.39e-17	-10.7072	3.34e-21	1.22e-19
PLAGL1	47.3958	1309.07	4.78385	3.43e-21	1.25e-19
THRB	856.991	26.3758	-5.01565	3.53e-21	1.28e-19
RP11-865I6.2	207.608	1.39e-17	-10.7007	3.7e-21	1.34e-19
SCN2B	1.39e-17	208.865	10.7093	3.7e-21	1.34e-19
ADPRHL1	719.53	21.1016	-5.0837	3.78e-21	1.37e-19
COL4A2	5.68356	347.05	5.90025	3.88e-21	1.4e-19
GLDN	238.893	1.05956	-7.66261	4.07e-21	1.47e-19
G0S2	1.89147	267.936	7.05145	4.23e-21	1.53e-19
RP11-313J2.1	0.943449	238.4	7.79655	4.45e-21	1.6e-19
ENPP4	14.2156	553.8	5.27107	5.02e-21	1.81e-19
ADAMTS3	1.39e-17	205.7	10.6873	5.03e-21	1.81e-19
NETO1	1.39e-17	205.7	10.6873	5.03e-21	1.81e-19
LINC01224	7.57958	390.299	5.66236	5.14e-21	1.84e-19
PTX3	0.943449	236.291	7.78374	5.34e-21	1.91e-19
DNAJC12	435.129	8.44339	-5.66751	5.48e-21	1.96e-19
HOXB4	1.89147	263.717	7.02856	5.86e-21	2.09e-19
FHL2	419.961	9360.73	4.47787	5.95e-21	2.12e-19
GLB1L2	362.133	5.27886	-6.06818	6.16e-21	2.19e-19
TMEM200B	0.943449	234.181	7.77081	6.4e-21	2.28e-19
HOXC13-AS	200.972	1.39e-17	-10.6538	6.88e-21	2.44e-19
KLK1	1.39e-17	202.536	10.6649	6.88e-21	2.44e-19
PAG1	3.78753	287.978	6.20073	7.03e-21	2.49e-19
HIST1H3H	565.954	14.7725	-5.24834	7.07e-21	2.5e-19
ARHGAP28	1.89147	260.552	7.01115	7.51e-21	2.66e-19
IRX5	651.274	18.9919	-5.09099	8.11e-21	2.86e-19
COL25A1	1.89147	259.497	7.0053	8.17e-21	2.87e-19
GOLGA8IP	1.89147	259.497	7.0053	8.17e-21	2.87e-19
RP11-203J24.8	284.397	3.1692	-6.43461	8.18e-21	2.88e-19
PABPC4L	0.943449	232.071	7.75776	8.44e-21	2.96e-19
ZNF280B	1.39e-17	200.426	10.6498	8.49e-21	2.98e-19
CH17-360D5.2	1.39e-17	199.371	10.6422	9.43e-21	3.3e-19
AC099850.1	755.554	23.2112	-5.01743	9.56e-21	3.34e-19
ZIC1	401.001	7.38854	-5.73935	9.71e-21	3.39e-19
CLIC2	7.57958	378.695	5.61884	1.02e-20	3.57e-19
TGFBR3	22.7477	710.972	4.95807	1.04e-20	3.61e-19
RP4-555D20.2	1.39e-17	198.316	10.6346	1.05e-20	3.65e-19
RAB42	0.943449	228.907	7.73796	1.12e-20	3.88e-19
EMP3	29.3837	858.651	4.86286	1.12e-20	3.89e-19
EFNB1	155.468	3521.09	4.50018	1.13e-20	3.93e-19
MECOM	196.232	1.39e-17	-10.6194	1.17e-20	4.03e-19
APOBEC3G	1.39e-17	197.261	10.6269	1.17e-20	4.03e-19
CLSTN2	196.232	1.39e-17	-10.6194	1.17e-20	4.03e-19
IL31RA	1.39e-17	196.206	10.6192	1.3e-20	4.48e-19
RP11-35O15.1	225.62	1.05956	-7.5802	1.35e-20	4.64e-19
NKX2-1	2.8395	278.485	6.55218	1.4e-20	4.83e-19
BICC1	1.39e-17	195.152	10.6114	1.45e-20	4.96e-19
ELMOD1	1.39e-17	195.152	10.6114	1.45e-20	4.96e-19
TNFRSF10D	0.943449	225.742	7.71788	1.48e-20	5.07e-19
PLEKHG6	782.098	25.3209	-4.94235	1.52e-20	5.19e-19
FZD9	6.63157	348.105	5.68667	1.66e-20	5.65e-19
PXDC1	6.63157	348.105	5.68667	1.66e-20	5.65e-19
LIX1L	27.4877	801.689	4.85964	1.66e-20	5.65e-19
BEND7	673.078	21.1016	-4.98743	1.66e-20	5.65e-19
CPE	3706.69	166.671	-4.47407	1.69e-20	5.75e-19
ENPEP	222.776	1.05956	-7.56191	1.79e-20	6.08e-19
MAPKBP1	192.44	1.39e-17	-10.5913	1.8e-20	6.1e-19
ITGB6	273.021	3.1692	-6.37574	1.92e-20	6.5e-19
RIMS2	6.63157	344.94	5.6735	2e-20	6.77e-19
PLEKHS1	191.492	1.39e-17	-10.5842	2e-20	6.77e-19
LINC00839	30.3317	853.377	4.80835	2.22e-20	7.5e-19
RP11-395N3.1	190.544	1.39e-17	-10.577	2.24e-20	7.53e-19
SAMD5	1.39e-17	191.987	10.5878	2.24e-20	7.53e-19
KIF17	3.78753	272.156	6.11924	2.25e-20	7.56e-19
VWDE	5.68356	318.569	5.77676	2.46e-20	8.25e-19
PLAG1	1.89147	246.839	6.93318	2.47e-20	8.29e-19
KIFC3	37.9158	1012.66	4.73447	2.57e-20	8.62e-19
LURAP1L	1214.39	47.4728	-4.67349	2.67e-20	8.92e-19
HEY2	966.959	35.8694	-4.74799	2.75e-20	9.19e-19
ICA1	1416.31	58.0213	-4.60656	2.76e-20	9.19e-19
MDFIC	1.39e-17	189.877	10.5719	2.79e-20	9.28e-19
PAK3	1.39e-17	189.877	10.5719	2.79e-20	9.28e-19
CTC-575D19.1	1089.25	41.1437	-4.72248	2.8e-20	9.3e-19
SH2D5	29.3837	823.841	4.80316	2.85e-20	9.47e-19
PYCARD	217.088	1.05956	-7.52461	2.9e-20	9.61e-19
IL18R1	0.943449	218.358	7.66993	2.9e-20	9.61e-19
CCDC83	187.7	1.39e-17	-10.5553	3.11e-20	1.03e-18
SLC35F1	0.943449	217.303	7.66295	3.2e-20	1.06e-18
COL6A2	262.593	5513.7	4.39144	3.23e-20	1.07e-18
SNPH	8.52759	378.695	5.45151	3.76e-20	1.24e-18
PCDHB16	185.804	1.39e-17	-10.5407	3.89e-20	1.28e-18
CP	376.353	7.38854	-5.64786	3.98e-20	1.31e-18
HLA-DRB1	30.3317	830.17	4.76858	4.1e-20	1.35e-18
EGFLAM	1.89147	240.51	6.89573	4.19e-20	1.37e-18
CNTNAP1	38.8638	988.398	4.66398	4.41e-20	1.45e-18
CNKSR1	329.901	5.27886	-5.93374	4.64e-20	1.52e-18
FAM101B	141.248	3026.36	4.42002	4.81e-20	1.57e-18
LINC01139	1.39e-17	184.603	10.5313	4.88e-20	1.59e-18
ANO9	392.469	8.44339	-5.51869	5.4e-20	1.76e-18
IFITM10	736.594	25.3209	-4.85589	5.87e-20	1.91e-18
RP11-566K19.6	1.39e-17	182.493	10.5147	6.13e-20	1.99e-18
RLN2	181.064	1.39e-17	-10.5034	6.13e-20	1.99e-18
PDGFB	408.585	9.49823	-5.40914	7.06e-20	2.29e-18
PTGFRN	5517.38	273.21	-4.3353	8.35e-20	2.71e-18
SYNE4	321.369	5.27886	-5.89596	8.44e-20	2.73e-18
AL121578.2	206.66	1.05956	-7.45364	8.66e-20	2.8e-18
CDC42EP3	54.9798	1287.97	4.54681	8.9e-20	2.87e-18
PDGFD	2.8395	255.278	6.42671	8.99e-20	2.9e-18
SSBP2	443.661	11.6079	-5.24183	9.56e-20	3.08e-18
ISL1	1.39e-17	178.274	10.481	9.72e-20	3.13e-18
DOCK3	18.0077	563.294	4.9572	9.87e-20	3.17e-18
TMEM145	5.68356	298.527	5.68305	1e-19	3.22e-18
ZFHX4	2.8395	253.168	6.41474	1.06e-19	3.41e-18
RAB38	1.39e-17	177.219	10.4724	1.09e-19	3.49e-18
IRAK3	1.39e-17	177.219	10.4724	1.09e-19	3.49e-18
RTN1	0.943449	204.645	7.57641	1.18e-19	3.76e-18
HIST1H2BD	865.523	33.7597	-4.67528	1.26e-19	4.02e-18
TMEM229B	728.062	26.3758	-4.78047	1.36e-19	4.32e-18
GPR68	314.733	5.27886	-5.86587	1.36e-19	4.32e-18
DPY19L2P1	2.8395	251.059	6.40268	1.37e-19	4.36e-18
PCDHGB1	174.428	1.39e-17	-10.4496	1.38e-19	4.39e-18
TDRP	2.8395	250.004	6.3966	1.49e-19	4.74e-18
FRG1CP	1.89147	226.797	6.81108	1.5e-19	4.76e-18
HBEGF	20.8517	591.775	4.81819	1.51e-19	4.78e-18
COL4A1	0.943449	201.481	7.55394	1.61e-19	5.08e-18
ULK2	664.546	23.2112	-4.8323	1.67e-19	5.27e-18
XYLT1	172.532	1.39e-17	-10.4339	1.75e-19	5.52e-18
CDYL2	1809.73	84.3925	-4.42057	1.77e-19	5.56e-18
KCNJ12	0.943449	200.426	7.54637	1.78e-19	5.61e-18
TMPRSS4	350.757	7.38854	-5.54628	1.89e-19	5.94e-18
IDNK	288.189	4.22403	-6.05242	1.94e-19	6.1e-18
TMEM30B	2134.9	102.325	-4.38133	1.97e-19	6.18e-18
RAMP3	171.584	1.39e-17	-10.4259	1.97e-19	6.18e-18
TOR4A	67.3039	1463.08	4.43953	2.09e-19	6.54e-18
MDGA2	0.943449	198.316	7.53112	2.2e-19	6.86e-18
MRGPRF	0.943449	198.316	7.53112	2.2e-19	6.86e-18
RP11-434D9.1	170.636	1.39e-17	-10.4179	2.23e-19	6.94e-18
TRPM2	10.4236	388.189	5.2015	2.23e-19	6.95e-18
ID2	1010.57	42.1985	-4.57791	2.28e-19	7.09e-18
PHYHD1	2.8395	244.729	6.36586	2.3e-19	7.15e-18
CTH	30.3317	768.989	4.65816	2.31e-19	7.15e-18
NUP210L	482.529	14.7725	-5.01833	2.46e-19	7.62e-18
CAPG	207.608	4027.42	4.27706	2.47e-19	7.66e-18
AC124789.1	1.39e-17	170.89	10.42	2.51e-19	7.76e-18
GPR160	1115.8	48.5276	-4.51972	2.6e-19	8.03e-18
MARVELD2	1498.79	69.6246	-4.42569	2.76e-19	8.52e-18
SMIM10	0.943449	195.152	7.50792	3.02e-19	9.32e-18
RP11-22C11.2	167.792	1.39e-17	-10.3937	3.2e-19	9.85e-18
C2CD4A	217.088	2.11438	-6.60303	3.22e-19	9.89e-18
BCL11B	700.57	26.3758	-4.72495	3.23e-19	9.91e-18
LINC00886	492.957	15.8273	-4.95043	3.51e-19	1.08e-17
BCAS3	6677.73	356.543	-4.22675	3.52e-19	1.08e-17
GPR27	417.117	11.6079	-5.15285	3.58e-19	1.09e-17
RP3-331H24.7	1.39e-17	167.726	10.393	3.62e-19	1.1e-17
ALDH3A1	166.844	1.39e-17	-10.3855	3.62e-19	1.1e-17
CD274	7.57958	320.679	5.37901	3.85e-19	1.17e-17
GOLGA8B	29.3837	733.124	4.63488	3.86e-19	1.18e-17
TRIM9	13.2676	435.657	5.02362	3.96e-19	1.2e-17
MYOM3	0.943449	193.042	7.49225	4.18e-19	1.27e-17
MAP3K15	4.73555	258.442	5.73198	4.29e-19	1.3e-17
TNXB	129.872	2523.2	4.27873	4.56e-19	1.38e-17
RP11-284F21.10	296.721	5.27886	-5.78088	4.82e-19	1.46e-17
SGMS2	36.0197	850.212	4.556	4.99e-19	1.51e-17
GPR162	8.52759	335.446	5.27661	5.18e-19	1.57e-17
LRIG1	4890.75	262.662	-4.21815	5.21e-19	1.57e-17
IGFBPL1	1.39e-17	164.561	10.3656	5.24e-19	1.58e-17
RP11-675F6.3	163.052	1.39e-17	-10.3524	5.24e-19	1.58e-17
SRPX	7.57958	315.404	5.35509	5.4e-19	1.63e-17
ELFN1-AS1	1.89147	213.084	6.72115	5.78e-19	1.74e-17
VAT1L	0.943449	189.877	7.46842	5.79e-19	1.74e-17
NAPRT	27.4877	680.382	4.62298	6.31e-19	1.89e-17
PLVAP	0.943449	188.822	7.46039	6.46e-19	1.94e-17
MERTK	20.8517	552.745	4.71978	6.77e-19	2.03e-17
PLEKHG4B	12.3196	406.121	5.02825	7.11e-19	2.12e-17
LNX1	309.993	6.3337	-5.58652	7.11e-19	2.12e-17
SOX30	3.78753	232.071	5.88948	7.33e-19	2.18e-17
FHDC1	548.89	20.0467	-4.76679	7.33e-19	2.18e-17
CNTNAP3	1.39e-17	161.396	10.3376	7.64e-19	2.27e-17
APOL1	3.78753	231.016	5.88291	8.03e-19	2.39e-17
HOXB13	0.943449	186.713	7.44419	8.06e-19	2.39e-17
CLDN3	952.739	42.1985	-4.49291	8.45e-19	2.51e-17
LINC01016	159.26	1.39e-17	-10.3185	8.67e-19	2.57e-17
BNC2	0.943449	185.658	7.43602	9.01e-19	2.67e-17
MAML3	381.093	10.5531	-5.15855	9.14e-19	2.7e-17
RP11-332H18.3	227.516	3.1692	-6.11284	9.64e-19	2.85e-17
TJP3	3300.94	178.274	-4.20979	9.85e-19	2.9e-17
GPC5	0.943449	184.603	7.42781	1.01e-18	2.97e-17
TMEM105	182.96	1.05956	-7.27802	1.01e-18	2.97e-17
SHANK2	2173.77	113.928	-4.25256	1.02e-18	3.01e-17
EXT1	427.545	7568.54	4.14545	1.04e-18	3.06e-17
EFNA1	1340.47	65.4052	-4.35468	1.08e-18	3.16e-17
TACSTD2	2063.8	107.599	-4.26004	1.1e-18	3.21e-17
ANKRD36BP2	1.39e-17	158.232	10.309	1.12e-18	3.28e-17
CCDC82	47.3958	1008.44	4.40747	1.18e-18	3.44e-17
TRIM2	1007.72	46.4179	-4.43673	1.18e-18	3.44e-17
PAX6	15.1636	448.315	4.87397	1.27e-18	3.7e-17
CHSY3	1.39e-17	157.177	10.2994	1.27e-18	3.71e-17
TRAPPC6A	1242.83	60.1309	-4.36664	1.32e-18	3.84e-17
RIN1	14.2156	429.328	4.90388	1.35e-18	3.91e-17
RP3-439F8.1	223.724	3.1692	-6.0886	1.4e-18	4.06e-17
PARD6B	4693.56	263.717	-4.153	1.42e-18	4.11e-17
EVC2	1.89147	203.59	6.65543	1.43e-18	4.14e-17
ASCL2	155.468	1.39e-17	-10.2837	1.45e-18	4.2e-17
EPHB2	74.8879	1475.74	4.29819	1.48e-18	4.29e-17
RP11-196G18.22	1148.03	55.9116	-4.35693	1.55e-18	4.47e-17
JPH3	200.972	2.11438	-6.49182	1.58e-18	4.57e-17
CNKSR2	0.943449	180.384	7.39447	1.59e-18	4.57e-17
CRACR2B	1567.05	80.1731	-4.28674	1.69e-18	4.86e-17
FSCN1	255.957	4522.14	4.14235	1.7e-18	4.88e-17
PIK3AP1	14.2156	425.109	4.88963	1.73e-18	4.99e-17
CPEB1	4.73555	241.565	5.63459	1.81e-18	5.21e-17
NR0B1	1.39e-17	155.067	10.2799	1.88e-18	5.39e-17
APOBEC3F	1.39e-17	155.067	10.2799	1.88e-18	5.39e-17
KCND3	199.076	2.11438	-6.47815	1.95e-18	5.57e-17
LINC00857	7.57958	296.417	5.26555	2.04e-18	5.85e-17
CABLES1	1130.96	55.9116	-4.33533	2.15e-18	6.14e-17
CALB2	0.943449	177.219	7.36895	2.24e-18	6.38e-17
FAM43B	0.943449	177.219	7.36895	2.24e-18	6.38e-17
GUCY1B2	218.036	3.1692	-6.05147	2.24e-18	6.38e-17
PNPLA3	20.8517	522.155	4.63766	2.29e-18	6.52e-17
GNAL	15.1636	435.657	4.83266	2.4e-18	6.82e-17
STAC	1.39e-17	152.958	10.2602	2.45e-18	6.94e-17
PHYHIPL	1.39e-17	152.958	10.2602	2.45e-18	6.94e-17
MPP1	0.943449	176.164	7.36035	2.51e-18	7.12e-17
PCDH19	8.52759	311.185	5.16834	2.55e-18	7.22e-17
RAMP2	1.39e-17	151.903	10.2502	2.8e-18	7.9e-17
ABCB4	38.8638	819.622	4.39388	2.82e-18	7.96e-17
RPRML	0.943449	175.109	7.35169	2.82e-18	7.96e-17
DGKI	0.943449	175.109	7.35169	2.82e-18	7.96e-17
HS3ST3B1	31.2797	701.479	4.4814	2.92e-18	8.22e-17
DSEL	2.8395	216.249	6.18745	2.99e-18	8.41e-17
KCNMB2-AS1	149.78	1.39e-17	-10.23	3.2e-18	8.97e-17
IGSF9B	149.78	1.39e-17	-10.23	3.2e-18	8.97e-17
SH3PXD2A	80.5759	1506.33	4.22235	3.23e-18	9.07e-17
NKX2-5	3.78753	215.194	5.78061	3.29e-18	9.22e-17
CLGN	27.4877	629.749	4.51143	3.48e-18	9.73e-17
ANO2	9.4756	324.898	5.08061	3.51e-18	9.81e-17
ZNF597	172.532	1.05956	-7.19342	3.57e-18	9.97e-17
WFDC2	3.78753	214.139	5.77352	3.63e-18	1.01e-16
CAPN6	1.39e-17	149.793	10.23	3.65e-18	1.01e-16
PCDH10	1.39e-17	149.793	10.23	3.65e-18	1.01e-16
RP11-438D14.3	148.832	1.39e-17	-10.2209	3.65e-18	1.01e-16
EDNRB	1.39e-17	149.793	10.23	3.65e-18	1.01e-16
MSRB2	642.742	27.4306	-4.54436	3.8e-18	1.05e-16
C1QL4	8.52759	305.911	5.14369	3.86e-18	1.07e-16
FAHD2B	26.5397	609.707	4.51517	3.92e-18	1.09e-16
PALD1	18.9557	492.619	4.69032	4.01e-18	1.11e-16
RBM11	1.89147	194.097	6.58658	4.06e-18	1.12e-16
NEIL3	147.884	1.39e-17	-10.2116	4.18e-18	1.15e-16
NGFR	18.0077	474.686	4.71034	4.24e-18	1.17e-16
CA2	1875.15	103.38	-4.1794	4.29e-18	1.18e-16
CTD-2231H16.1	1.89147	193.042	6.57872	4.52e-18	1.24e-16
ADAMTS2	0.943449	171.945	7.3254	4.53e-18	1.24e-16
HMSD	0.943449	171.945	7.3254	4.53e-18	1.24e-16
GCNT2	27.4877	621.31	4.49197	4.6e-18	1.26e-16
RASGRF1	1.89147	191.987	6.57082	5.04e-18	1.38e-16
EMCN	145.04	1.39e-17	-10.1836	5.49e-18	1.5e-16
ABAT	3741.77	221.523	-4.07746	5.56e-18	1.52e-16
TCF4	0.943449	169.835	7.3076	5.75e-18	1.57e-16
NKX6-1	0.943449	169.835	7.3076	5.75e-18	1.57e-16
RP11-196G18.3	208.556	3.1692	-5.98738	5.93e-18	1.62e-16
ST3GAL1	2308.38	132.915	-4.11708	6.07e-18	1.65e-16
PNPLA4	1.89147	189.877	6.55489	6.25e-18	1.7e-16
RNF152	708.154	32.7049	-4.43145	6.3e-18	1.71e-16
BARHL2	1.39e-17	145.574	10.1889	6.3e-18	1.71e-16
C1S	8.52759	297.472	5.10335	6.78e-18	1.84e-16
EPHA2	278.709	4588.6	4.04059	7.04e-18	1.91e-16
NOVA2	143.144	1.39e-17	-10.1647	7.23e-18	1.96e-16
SOWAHB	143.144	1.39e-17	-10.1647	7.23e-18	1.96e-16
GSTM4	606.718	26.3758	-4.51748	7.54e-18	2.04e-16
MSRB3	12.3196	362.872	4.86585	7.95e-18	2.14e-16
CRIM1	524.242	8432.46	4.00732	7.95e-18	2.14e-16
PRKCQ-AS1	1.39e-17	143.464	10.1678	8.31e-18	2.24e-16
AP000783.1	1.89147	186.713	6.53066	8.68e-18	2.33e-16
RP11-214O1.2	1.89147	186.713	6.53066	8.68e-18	2.33e-16
KHDRBS3	6.63157	259.497	5.26304	8.78e-18	2.36e-16
TINCR	1593.59	89.6667	-4.14975	9.05e-18	2.43e-16
NPY1R	680.662	31.65	-4.42146	9.17e-18	2.46e-16
ZNF626	0.943449	165.616	7.27133	9.35e-18	2.5e-16
EREG	141.248	1.39e-17	-10.1455	9.55e-18	2.55e-16
PTPN20	1.39e-17	142.409	10.1572	9.55e-18	2.55e-16
SLC13A5	1.39e-17	142.409	10.1572	9.55e-18	2.55e-16
CILP2	58.7718	1089.66	4.2096	9.55e-18	2.55e-16
HIST1H2AC	471.153	18.9919	-4.62403	9.81e-18	2.61e-16
RP11-284F21.9	239.841	4.22403	-5.78761	9.94e-18	2.65e-16
LDLRAD4	1069.34	56.9664	-4.2276	1.02e-17	2.72e-16
MAP1A	18.0077	454.644	4.64812	1.07e-17	2.85e-16
SERPINA5	3.78753	203.59	5.70069	1.08e-17	2.87e-16
SNAP91	1.89147	184.603	6.51427	1.08e-17	2.87e-16
ENG	40.7598	801.689	4.29348	1.1e-17	2.9e-16
HDAC9	1.39e-17	141.354	10.1465	1.1e-17	2.91e-16
IL1R2	2.8395	202.536	6.09299	1.2e-17	3.17e-16
COBL	2095.08	123.422	-4.08402	1.24e-17	3.29e-16
SH2B3	141.248	2358.65	4.06041	1.25e-17	3.29e-16
RP11-609N14.4	353.601	11.6079	-4.9146	1.28e-17	3.37e-16
RP11-15E18.1	320.421	9.49823	-5.0586	1.31e-17	3.44e-16
CYB5R2	6.63157	254.223	5.23343	1.32e-17	3.48e-16
KRCC1	993.503	52.747	-4.23227	1.37e-17	3.6e-16
VSTM1	1.39e-17	139.245	10.1248	1.46e-17	3.82e-16
SH3RF3-AS1	1.39e-17	139.245	10.1248	1.46e-17	3.82e-16
DAB2	2.8395	200.426	6.07789	1.47e-17	3.85e-16
PTPN7	22.7477	510.551	4.48043	1.49e-17	3.91e-16
ADGRL2	216.14	3486.28	4.01083	1.49e-17	3.91e-16
AQP3	1035.22	55.9116	-4.20772	1.5e-17	3.92e-16
RP5-1065J22.8	334.641	10.5531	-4.97109	1.52e-17	3.96e-16
GLRA3	234.152	4.22403	-5.753	1.54e-17	4.02e-16
MAPK10	198.128	3.1692	-5.91342	1.63e-17	4.24e-16
ST6GALNAC3	1.39e-17	138.19	10.1138	1.68e-17	4.38e-16
FRMD4A	412.377	15.8273	-4.69301	1.69e-17	4.4e-16
GSE1	12251	794.306	-3.94686	1.74e-17	4.52e-16
SACS	123.236	2045.36	4.05143	1.82e-17	4.71e-16
GJB2	136.508	1.39e-17	-10.0963	1.94e-17	5.03e-16
CALML3-AS1	136.508	1.39e-17	-10.0963	1.94e-17	5.03e-16
C16orf45	671.182	32.7049	-4.35411	2.01e-17	5.21e-16
EPS8L1	1263.68	71.7343	-4.13656	2.03e-17	5.25e-16
FEZ1	264.489	6.3337	-5.35759	2.11e-17	5.45e-16
CDH13	135.56	1.39e-17	-10.0862	2.24e-17	5.78e-16
GPR87	135.56	1.39e-17	-10.0862	2.24e-17	5.78e-16
RP11-728G15.1	0.943449	157.177	7.19593	2.54e-17	6.55e-16
ETV5	104.276	1729.96	4.05057	2.57e-17	6.61e-16
PIK3R3	2200.31	136.08	-4.01399	2.73e-17	7.01e-16
MR1	1425.79	83.3376	-4.0947	2.73e-17	7.01e-16
HLA-V	3.78753	194.097	5.63184	2.74e-17	7.04e-16
PRSS12	25.5917	541.142	4.39531	2.79e-17	7.15e-16
GPR176	109.964	1811.18	4.04023	2.82e-17	7.21e-16
FGF12	4.73555	212.029	5.44654	2.88e-17	7.37e-16
WDR87	4.73555	212.029	5.44654	2.88e-17	7.37e-16
AK7	765.034	40.0888	-4.25018	2.89e-17	7.37e-16
C9orf106	155.468	1.05956	-7.04329	2.89e-17	7.37e-16
DLX3	133.664	1.39e-17	-10.0659	3e-17	7.64e-16
GDF6	1.39e-17	135.025	10.0804	3e-17	7.64e-16
ZIK1	1.89147	175.109	6.43816	3e-17	7.64e-16
PRSS23	16501.9	1109.71	-3.89424	3.08e-17	7.84e-16
LTBP1	2635.45	166.671	-3.98201	3.39e-17	8.62e-16
F2R	29.3837	597.049	4.33872	3.41e-17	8.64e-16
SLC4A4	1.39e-17	133.97	10.0691	3.48e-17	8.81e-16
HOXB9	20.8517	459.919	4.45461	3.66e-17	9.25e-16
MARK1	0.943449	155.067	7.17645	3.74e-17	9.45e-16
DNAJC22	1961.41	121.312	-4.01376	3.82e-17	9.65e-16
ADAM19	35.0717	682.492	4.27738	3.82e-17	9.65e-16
CMTM7	4.73555	208.865	5.42486	3.87e-17	9.76e-16
STEAP1	1.39e-17	132.915	10.0577	4.03e-17	1.01e-15
FAM27C	1.39e-17	132.915	10.0577	4.03e-17	1.01e-15
FAM132B	12.3196	334.392	4.74797	4.38e-17	1.1e-15
ARHGEF35	222.776	4.22403	-5.68119	4.56e-17	1.15e-15
RB1	1376.5	82.2828	-4.0623	4.65e-17	1.17e-15
RIMS1	1.39e-17	131.861	10.0462	4.67e-17	1.17e-15
ZNF804A	6.63157	239.455	5.14713	4.69e-17	1.17e-15
ADCY7	50.2398	894.516	4.15069	4.84e-17	1.21e-15
PLBD1	27.4877	556.965	4.33427	4.99e-17	1.25e-15
RORB	1.39e-17	130.806	10.0347	5.43e-17	1.36e-15
ADAMTSL4	115.652	1829.11	3.98176	5.52e-17	1.38e-15
CD163L1	3.78753	187.768	5.58404	5.8e-17	1.45e-15
PNMA6A	1.89147	169.835	6.39407	6.07e-17	1.51e-15
GSN	7345.13	501.058	-3.87342	6.28e-17	1.56e-15
LINC00304	128.924	1.39e-17	-10.0139	6.31e-17	1.56e-15
ACTBL2	1.39e-17	129.751	10.023	6.31e-17	1.56e-15
AC016735.2	1.39e-17	129.751	10.023	6.31e-17	1.56e-15
ZNF471	1.39e-17	129.751	10.023	6.31e-17	1.56e-15
RIPPLY3	149.78	1.05956	-6.98956	6.31e-17	1.56e-15
NUDT16P1	0.943449	150.848	7.13669	6.31e-17	1.56e-15
GOLT1A	281.553	8.44339	-5.0397	6.56e-17	1.62e-15
MAP3K14	29.3837	578.062	4.2921	6.82e-17	1.69e-15
PPM1H	3234.58	214.139	-3.91621	6.96e-17	1.72e-15
CSGALNACT1	295.773	9.49823	-4.94317	7.2e-17	1.78e-15
SRGAP2D	0.943449	149.793	7.12657	7.21e-17	1.78e-15
HRH1	13.2676	341.776	4.67359	7.28e-17	1.79e-15
HLA-DPB1	1.39e-17	128.696	10.0112	7.34e-17	1.8e-15
POTEF	1.39e-17	128.696	10.0112	7.34e-17	1.8e-15
EVA1A	1.39e-17	128.696	10.0112	7.34e-17	1.8e-15
ARHGEF38	166.844	2.11438	-6.22351	7.71e-17	1.89e-15
ARAP3	33.1757	630.804	4.24366	8.07e-17	1.98e-15
PTPN22	293.877	9.49823	-4.9339	8.29e-17	2.03e-15
ZNF470	1.39e-17	127.641	9.99937	8.55e-17	2.09e-15
SFTA1P	1.39e-17	127.641	9.99937	8.55e-17	2.09e-15
FAM196B	1.39e-17	127.641	9.99937	8.55e-17	2.09e-15
SVIL	3330.33	223.632	-3.89574	8.59e-17	2.1e-15
OAF	105.224	1646.62	3.96631	9.03e-17	2.2e-15
MXD1	1458.97	91.7764	-3.98892	9.38e-17	2.28e-15
MSR1	0.943449	147.683	7.10612	9.41e-17	2.29e-15
NPAS3	145.988	1.05956	-6.9526	9.41e-17	2.29e-15
SLIT3	4.73555	199.371	5.35779	9.56e-17	2.32e-15
ALOX15	437.025	20.0467	-4.43808	9.89e-17	2.4e-15
EHF	125.132	1.39e-17	-9.97085	9.96e-17	2.42e-15
ATP8B1	2783.33	186.713	-3.89706	1.04e-16	2.52e-15
RP11-885L14.1	1.39e-17	125.532	9.97534	1.16e-16	2.81e-15
RP11-706O15.5	124.184	1.39e-17	-9.95989	1.16e-16	2.81e-15
RP11-61K9.3	476.841	22.1564	-4.4203	1.19e-16	2.88e-15
HIST1H4H	518.554	25.3209	-4.34961	1.22e-16	2.95e-15
ZNF486	317.577	11.6079	-4.75964	1.23e-16	2.96e-15
LUM	1.39e-17	124.477	9.96318	1.36e-16	3.27e-15
SNAI2	3.78753	178.274	5.50924	1.57e-16	3.78e-15
ZFP28	1.39e-17	123.422	9.95091	1.59e-16	3.81e-15
LRRC75B	122.288	1.39e-17	-9.93772	1.59e-16	3.81e-15
DCAF12L2	1.39e-17	123.422	9.95091	1.59e-16	3.81e-15
CPA4	1.89147	161.396	6.32059	1.6e-16	3.84e-15
OLFM1	142.196	1.05956	-6.91466	1.62e-16	3.89e-15
ZNF467	620.938	33.7597	-4.19624	1.71e-16	4.11e-15
SEMA4A	634.21	34.8146	-4.18252	1.76e-16	4.22e-15
ZFP92	1.39e-17	122.367	9.93854	1.86e-16	4.44e-15
CHRNA7	0.943449	142.409	7.0537	1.86e-16	4.44e-15
PSMB9	20.8517	439.876	4.39034	1.87e-16	4.46e-15
FBN1	149.78	2191.98	3.87015	1.88e-16	4.48e-15
TPM2	289.137	4093.87	3.82304	1.93e-16	4.6e-15
POF1B	409.533	18.9919	-4.42188	1.96e-16	4.67e-15
SMAD6	656.962	36.9243	-4.14876	2.05e-16	4.87e-15
GATM	8.52759	252.113	4.86477	2.1e-16	4.98e-15
FRAT2	1609.71	106.544	-3.91576	2.1e-16	4.99e-15
SEMA3G	6.63157	222.578	5.04174	2.14e-16	5.07e-15
C2CD4C	120.392	1.39e-17	-9.9152	2.17e-16	5.15e-15
RP11-701H24.4	1.39e-17	121.312	9.92607	2.17e-16	5.15e-15
RAB31	11546.7	841.774	-3.77771	2.19e-16	5.17e-15
RP11-830F9.7	174.428	3.1692	-5.72975	2.21e-16	5.22e-15
ELOVL2	192.44	2753.16	3.8377	2.27e-16	5.35e-15
ANGPTL2	1.89147	158.232	6.29205	2.33e-16	5.49e-15
SH3YL1	2463.86	170.89	-3.84884	2.37e-16	5.6e-15
TBC1D30	1098.73	69.6246	-3.97778	2.47e-16	5.83e-15
KLHDC9	234.152	6.3337	-5.18193	2.54e-16	5.97e-15
NETO2	273.969	3840.71	3.80865	2.54e-16	5.97e-15
LTB	306.201	11.6079	-4.70704	2.56e-16	6e-15
ALOX12P2	219.932	5.27886	-5.34905	2.57e-16	6.03e-15
CIART	361.185	15.8273	-4.50185	2.74e-16	6.43e-15
RGS2	7.57958	234.181	4.9257	2.77e-16	6.48e-15
PLCL2	0.943449	139.245	7.02131	2.83e-16	6.62e-15
BAG2	106.172	1573.84	3.88817	2.89e-16	6.76e-15
CDKN2B	34.1237	606.542	4.14659	2.98e-16	6.97e-15
CTD-2054N24.2	1.39e-17	119.202	9.90078	2.99e-16	6.97e-15
LIPG	1.39e-17	119.202	9.90078	2.99e-16	6.97e-15
PHLDB2	102.38	1517.93	3.8884	2.99e-16	6.97e-15
RGS7BP	1.89147	156.122	6.2727	2.99e-16	6.97e-15
WNK4	9.4756	262.662	4.77396	3.01e-16	7.01e-15
DECR1	3101.86	220.468	-3.81377	3.04e-16	7.08e-15
CECR7	2.8395	173	5.86573	3.12e-16	7.25e-15
EGR1	1739.58	118.148	-3.87872	3.14e-16	7.29e-15
ZNF469	200.972	4.22403	-5.53268	3.43e-16	7.96e-15
PCDHA6	398.157	18.9919	-4.38125	3.48e-16	8.05e-15
TLE4	68.2519	1053.8	3.94602	3.63e-16	8.4e-15
BFSP1	342.225	14.7725	-4.52281	3.72e-16	8.6e-15
KIAA1683	244.581	7.38854	-5.02635	3.74e-16	8.63e-15
STEAP2	0.943449	137.135	6.9993	3.75e-16	8.65e-15
NELL2	0.943449	137.135	6.9993	3.75e-16	8.65e-15
NRP1	1933.92	135.025	-3.83904	3.84e-16	8.84e-15
KCNS1	2.8395	170.89	5.84804	3.94e-16	9.07e-15
TUBB4A	17.0597	369.202	4.42533	4.03e-16	9.28e-15
LCA5	25.5917	477.851	4.21591	4.05e-16	9.31e-15
CH17-360D5.3	1.39e-17	117.093	9.87504	4.13e-16	9.49e-15
RP11-219A15.1	1.39e-17	117.093	9.87504	4.13e-16	9.49e-15
GNA15	14.2156	328.062	4.51589	4.28e-16	9.82e-15
RAB27B	1333.84	89.6667	-3.89307	4.3e-16	9.85e-15
XDH	0.943449	136.08	6.98817	4.32e-16	9.9e-15
KCNMA1	3.78753	169.835	5.43932	4.43e-16	1.01e-14
EBI3	6.63157	214.139	4.98601	4.51e-16	1.03e-14
SH2D2A	4.73555	184.603	5.24683	4.65e-16	1.06e-14
DYRK1B	907.235	58.0213	-3.96404	4.83e-16	1.1e-14
BNIPL	269.229	9.49823	-4.80757	4.84e-16	1.1e-14
LCP1	268.281	9.49823	-4.80249	5.22e-16	1.19e-14
EFEMP1	11.3716	282.704	4.62009	5.55e-16	1.26e-14
ARHGAP24	3.78753	167.726	5.4213	5.61e-16	1.27e-14
SPAG16	2.8395	167.726	5.8211	5.61e-16	1.27e-14
ARL17B	3.78753	167.726	5.4213	5.61e-16	1.27e-14
MAP10	114.704	1.39e-17	-9.84545	5.74e-16	1.3e-14
RP11-166D19.1	1.39e-17	116.038	9.862	5.74e-16	1.3e-14
CYP4F11	114.704	1.39e-17	-9.84545	5.74e-16	1.3e-14
TENM2	1.39e-17	116.038	9.862	5.74e-16	1.3e-14
NFIA	767.878	47.4728	-4.0123	6.14e-16	1.39e-14
C10orf25	2.8395	166.671	5.812	6.32e-16	1.43e-14
AASS	40.7598	663.504	4.02058	6.33e-16	1.43e-14
LZTS1	0.943449	133.97	6.96565	6.66e-16	1.5e-14
CFL2	302.409	4031.64	3.73622	6.68e-16	1.51e-14
CCR10	12.3196	293.252	4.55865	6.71e-16	1.51e-14
GRIN2B	1.39e-17	114.983	9.84884	6.77e-16	1.52e-14
COL1A1	619.042	8090.69	3.70787	6.89e-16	1.55e-14
TMSB15A	3.78753	165.616	5.40305	7.13e-16	1.6e-14
LDHD	384.885	18.9919	-4.33235	7.33e-16	1.64e-14
ADGRD2	8.52759	237.346	4.77773	7.36e-16	1.65e-14
ATP1A3	65.4079	978.904	3.90096	7.71e-16	1.73e-14
LPCAT2	112.808	1.39e-17	-9.82143	7.99e-16	1.79e-14
CDX2	1.39e-17	113.928	9.83556	7.99e-16	1.79e-14
KIF7	42.6558	680.382	3.99142	8.36e-16	1.87e-14
SLIT2	1.89147	148.738	6.20285	8.43e-16	1.88e-14
KIRREL2	1.89147	148.738	6.20285	8.43e-16	1.88e-14
TGFB3	703.414	43.2534	-4.01975	8.78e-16	1.96e-14
UGDH	20455.1	1607.59	-3.66938	8.84e-16	1.97e-14
RP4-639F20.1	0.943449	131.861	6.94277	8.93e-16	1.99e-14
CDKN1C	10.4236	262.662	4.63816	8.96e-16	1.99e-14
CACNA1A	4.73555	178.274	5.19653	9.02e-16	2e-14
GGT6	111.86	1.39e-17	-9.80927	9.45e-16	2.1e-14
CCDC162P	111.86	1.39e-17	-9.80927	9.45e-16	2.1e-14
DZIP1L	8.52759	234.181	4.75838	9.53e-16	2.11e-14
FOLH1	1.89147	147.683	6.19259	9.62e-16	2.13e-14
USP32P1	1.89147	147.683	6.19259	9.62e-16	2.13e-14
RHOH	129.872	1.05956	-6.784	1.03e-15	2.29e-14
SCCPDH	194.336	2589.66	3.73524	1.05e-15	2.31e-14
FN1	3100.91	38972.4	3.65163	1.1e-15	2.43e-14
SLC16A1-AS1	5.68356	190.932	5.03858	1.18e-15	2.59e-14
FCHO1	356.445	4600.2	3.68946	1.18e-15	2.61e-14
MUM1L1	0.943449	129.751	6.91952	1.2e-15	2.64e-14
PLXNB1	1951.93	144.519	-3.75447	1.29e-15	2.84e-14
CTD-2373N4.3	109.016	1.39e-17	-9.77216	1.33e-15	2.91e-14
LINC00922	1.39e-17	110.764	9.79496	1.33e-15	2.91e-14
SLC7A2	11938.2	953.588	-3.64591	1.33e-15	2.92e-14
FGFR1	382.989	4909.27	3.67968	1.34e-15	2.94e-14
DDR1	12364.8	989.452	-3.6433	1.38e-15	3.01e-14
IQSEC2	473.997	26.3758	-4.16142	1.39e-15	3.05e-14
DLK2	18.0077	360.763	4.31453	1.43e-15	3.13e-14
L1CAM	176.324	2329.11	3.72249	1.43e-15	3.13e-14
ITGA6	283.449	3644.51	3.68395	1.52e-15	3.32e-14
ZNF714	410.481	5210.96	3.66574	1.54e-15	3.37e-14
CPAMD8	421.857	22.1564	-4.24359	1.56e-15	3.4e-14
ZNF521	1.39e-17	109.709	9.78117	1.57e-15	3.42e-14
AP000439.3	108.068	1.39e-17	-9.75958	1.57e-15	3.42e-14
RP11-428L9.2	108.068	1.39e-17	-9.75958	1.57e-15	3.42e-14
RAB39B	108.068	1.39e-17	-9.75958	1.57e-15	3.42e-14
CCDC181	4.73555	174.055	5.162	1.59e-15	3.45e-14
SCN3B	1.89147	143.464	6.15081	1.65e-15	3.57e-14
MLYCD	853.199	58.0213	-3.87546	1.77e-15	3.84e-14
C14orf37	5.68356	186.713	5.00636	1.8e-15	3.89e-14
ARL4C	56.8758	840.719	3.88267	1.84e-15	3.99e-14
ZNF578	1.39e-17	108.654	9.76725	1.87e-15	4.04e-14
RP11-228M15.1	1.39e-17	108.654	9.76725	1.87e-15	4.04e-14
MOXD1	0.943449	126.586	6.88393	1.88e-15	4.06e-14
TNFRSF8	0.943449	126.586	6.88393	1.88e-15	4.06e-14
CNN3	527.086	6566.44	3.63867	2.06e-15	4.44e-14
OTOP2	0.943449	125.532	6.87187	2.19e-15	4.72e-14
KLRG2	106.172	1.39e-17	-9.73407	2.22e-15	4.78e-14
C1orf61	5.68356	184.603	4.98998	2.23e-15	4.79e-14
DAAM2	4.73555	170.89	5.13555	2.24e-15	4.82e-14
FAM102A	7992.61	647.682	-3.62507	2.33e-15	5.01e-14
LHFP	13.2676	289.033	4.43187	2.41e-15	5.17e-14
SUSD2	424.701	23.2112	-4.18654	2.48e-15	5.32e-14
RP1-63G5.7	1.39e-17	106.544	9.73899	2.65e-15	5.67e-14
TRIML2	1.39e-17	106.544	9.73899	2.65e-15	5.67e-14
CTSD	16084.8	1331.22	-3.59475	2.73e-15	5.84e-14
RGS9	5.68356	182.493	4.97341	2.77e-15	5.91e-14
CLIP2	143.144	1858.65	3.6975	2.83e-15	6.05e-14
TTC9	604.822	39.034	-3.94958	2.85e-15	6.09e-14
NCOA3	28901.8	2404	-3.58758	2.9e-15	6.17e-14
HCP5	6.63157	195.152	4.85214	2.92e-15	6.21e-14
OVOL2	194.336	5.27886	-5.17066	2.92e-15	6.21e-14
CHML	165.896	2130.8	3.682	2.96e-15	6.29e-14
TRIM37	24018.6	2001.05	-3.58524	3.03e-15	6.45e-14
TPD52L1	2933.12	233.126	-3.65257	3.2e-15	6.8e-14
RUNX2	232.256	8.44339	-4.76216	3.28e-15	6.96e-14
TOB1	11768.5	982.069	-3.5828	3.38e-15	7.17e-14
HIST1H3G	179.168	4.22403	-5.36712	3.44e-15	7.29e-14
LDHC	0.943449	122.367	6.83507	3.48e-15	7.36e-14
ERBB3	8676.12	718.356	-3.59406	3.58e-15	7.56e-14
ASNSP1	103.328	1.39e-17	-9.69495	3.77e-15	7.96e-14
ANK3	2183.25	173	-3.65672	3.94e-15	8.33e-14
TBX4	120.392	1.05956	-6.67476	4.06e-15	8.57e-14
AARD	12.3196	268.991	4.43412	4.15e-15	8.74e-14
MREG	3969.29	324.898	-3.61033	4.18e-15	8.81e-14
CASKIN1	229.412	8.44339	-4.74439	4.25e-15	8.96e-14
ARG2	31.2797	497.893	3.98694	4.45e-15	9.35e-14
RP5-884M6.1	1.39e-17	103.38	9.69554	4.5e-15	9.47e-14
DYSF	4.73555	164.561	5.08114	4.54e-15	9.53e-14
EGFR	301.461	3672.99	3.60634	4.56e-15	9.57e-14
C6orf183	327.057	16.8822	-4.2663	4.59e-15	9.62e-14
RP5-1073O3.2	119.444	1.05956	-6.66337	4.75e-15	9.95e-14
IL6	0.943449	120.257	6.81001	4.75e-15	9.95e-14
AMN	12.3196	266.881	4.42276	4.83e-15	1.01e-13
OTOF	6.63157	190.932	4.82062	4.88e-15	1.02e-13
LRRC37A3	361.185	20.0467	-4.16319	5.25e-15	1.1e-13
APOBR	148.832	3.1692	-5.50098	5.25e-15	1.1e-13
PPM1D	5696.55	476.796	-3.57831	5.31e-15	1.11e-13
RNF144A-AS1	1.39e-17	102.325	9.68076	5.39e-15	1.12e-13
EPHA1-AS1	1.39e-17	102.325	9.68076	5.39e-15	1.12e-13
HOXD13	1.39e-17	102.325	9.68076	5.39e-15	1.12e-13
IFI44	1.39e-17	102.325	9.68076	5.39e-15	1.12e-13
PLEKHF2	3699.11	305.911	-3.59548	5.43e-15	1.13e-13
VAV1	28.4357	456.754	3.99948	5.61e-15	1.16e-13
FAAH	561.214	36.9243	-3.92155	5.64e-15	1.17e-13
ESPN	853.199	61.1858	-3.799	5.76e-15	1.19e-13
DOCK2	3.78753	162.451	5.37524	5.77e-15	1.19e-13
SPINT1	2178.51	175.109	-3.63611	5.82e-15	1.2e-13
ANXA4	1875.15	149.793	-3.6449	5.89e-15	1.22e-13
NCR3LG1	65.4079	888.187	3.76068	5.89e-15	1.22e-13
EPDR1	76.7839	1016.88	3.72494	5.91e-15	1.22e-13
CHST3	32.2277	502.112	3.95621	5.91e-15	1.22e-13
ALDOC	250.269	10.5531	-4.55214	5.94e-15	1.22e-13
RP11-21L23.2	225.62	8.44339	-4.72036	6.05e-15	1.25e-13
NKD2	40.7598	595.994	3.86581	6.11e-15	1.26e-13
ICAM2	0.943449	118.148	6.7845	6.52e-15	1.34e-13
CNTLN	35.0717	534.813	3.92567	6.71e-15	1.38e-13
POLR3G	47.3958	674.053	3.82636	6.86e-15	1.41e-13
LINC01138	260.697	11.6079	-4.47504	7.08e-15	1.45e-13
DBF4	299.565	3572.78	3.57553	7.14e-15	1.46e-13
CHST6	7.57958	199.371	4.69367	7.22e-15	1.48e-13
OGFRL1	364.029	4311.17	3.56548	7.42e-15	1.52e-13
TUB	104.276	1328.06	3.66918	7.42e-15	1.52e-13
CRLF1	283.449	13.7176	-4.35705	7.7e-15	1.57e-13
ZNF717	1.39e-17	100.215	9.65074	7.75e-15	1.58e-13
RP11-280K24.4	1.39e-17	100.215	9.65074	7.75e-15	1.58e-13
FBXL7	2.8395	146.629	5.62731	7.77e-15	1.59e-13
KBTBD12	7.57958	198.316	4.68602	7.98e-15	1.63e-13
TMEM139	5.68356	173	4.89638	8.41e-15	1.71e-13
ABC7-42404400C24.1	317.577	16.8822	-4.22388	8.62e-15	1.75e-13
CALHM3	9.4756	222.578	4.53518	8.63e-15	1.76e-13
FAT4	26.5397	424.054	3.99142	8.76e-15	1.78e-13
SLC38A3	0.943449	116.038	6.75853	8.99e-15	1.83e-13
PKP1	960.323	72.7891	-3.71954	9.1e-15	1.85e-13
RP11-23N2.4	98.588	1.39e-17	-9.62729	9.32e-15	1.89e-13
RP4-555D20.1	1.39e-17	99.1603	9.6355	9.32e-15	1.89e-13
GPR63	13.2676	270.046	4.33388	9.61e-15	1.95e-13
RYR1	32.2277	490.509	3.92249	9.73e-15	1.97e-13
SMO	8.52759	208.865	4.59341	1.01e-14	2.05e-13
CMB9-22P13.1	98.588	1236.29	3.64671	1.07e-14	2.17e-13
MIR222HG	1.39e-17	98.1055	9.62008	1.12e-14	2.26e-13
GRHL1	1221.02	97.0506	-3.65158	1.13e-14	2.27e-13
PRR5L	6.63157	182.493	4.75545	1.14e-14	2.3e-13
ARHGAP40	1.89147	129.751	6.00599	1.19e-14	2.39e-13
DNAJB4	60.6678	802.744	3.72308	1.2e-14	2.41e-13
HLA-A	346.017	4012.65	3.53515	1.2e-14	2.41e-13
SKIDA1	113.756	1.05956	-6.59305	1.24e-14	2.5e-13
KLF4	2328.29	196.206	-3.56802	1.33e-14	2.68e-13
HOXD9	1.39e-17	97.0506	9.60451	1.35e-14	2.7e-13
C10orf82	96.692	1.39e-17	-9.59931	1.35e-14	2.7e-13
PTPRR	1.39e-17	97.0506	9.60451	1.35e-14	2.7e-13
RP11-818F20.5	1.39e-17	97.0506	9.60451	1.35e-14	2.7e-13
Y_RNA	96.692	1.39e-17	-9.59931	1.35e-14	2.7e-13
TRAF3IP2	1718.73	142.409	-3.59212	1.45e-14	2.91e-13
ZNF662	0.943449	113.928	6.73209	1.47e-14	2.92e-13
GAS1	0.943449	113.928	6.73209	1.47e-14	2.92e-13
GRIK4	5.68356	167.726	4.85175	1.49e-14	2.98e-13
NADSYN1	3037.4	262.662	-3.53096	1.61e-14	3.21e-13
PHF2	2093.19	177.219	-3.56121	1.68e-14	3.34e-13
FAM167A	36.9677	530.593	3.83856	1.89e-14	3.76e-13
ADAMTS6	16.1116	294.307	4.18021	1.96e-14	3.89e-13
RELN	1.39e-17	95.9958	9.58876	1.97e-14	3.91e-13
PTH1R	1.39e-17	95.9958	9.58876	1.97e-14	3.91e-13
HMGA1	4415.8	48370.1	3.45333	2.01e-14	4e-13
KCTD19	0.943449	111.819	6.70515	2.04e-14	4.05e-13
TMEM25	81.5239	1011.6	3.63116	2.09e-14	4.14e-13
GABARAPL1	92.9	1138.19	3.61306	2.26e-14	4.48e-13
ATP9A	5183.68	464.138	-3.48101	2.29e-14	4.53e-13
LINC00632	1.39e-17	94.941	9.57284	2.38e-14	4.71e-13
KCTD4	1.39e-17	94.941	9.57284	2.38e-14	4.71e-13
ABHD2	23665	2174.05	-3.44423	2.39e-14	4.71e-13
PM20D2	571.642	6323.82	3.46731	2.4e-14	4.73e-13
ARFGEF3	5585.63	503.167	-3.4723	2.49e-14	4.9e-13
PSD4	2528.32	221.523	-3.51194	2.54e-14	5e-13
RP11-420L9.5	3.78753	150.848	5.26841	2.55e-14	5.02e-13
FAM63A	2146.28	186.713	-3.5221	2.62e-14	5.15e-13
SULT2B1	388.677	24.2661	-3.99491	2.74e-14	5.38e-13
FAM19A2	9.4756	209.919	4.45075	2.85e-14	5.6e-13
ROBO3	30.3317	444.096	3.86623	2.86e-14	5.61e-13
RP11-830F9.5	92.9	1.39e-17	-9.54167	2.89e-14	5.64e-13
HTR7	1.39e-17	93.8861	9.55674	2.89e-14	5.64e-13
RP11-364B14.3	1.39e-17	93.8861	9.55674	2.89e-14	5.64e-13
TNFRSF9	1.39e-17	93.8861	9.55674	2.89e-14	5.64e-13
RP11-527L4.2	1.39e-17	93.8861	9.55674	2.89e-14	5.64e-13
RP4-555D20.4	1.39e-17	93.8861	9.55674	2.89e-14	5.64e-13
ZFP36	724.27	55.9116	-3.69247	2.91e-14	5.68e-13
KIAA1217	1488.36	126.586	-3.55429	2.97e-14	5.8e-13
MFSD6	989.711	80.1731	-3.62384	3.22e-14	6.29e-13
AC106786.1	107.12	1.05956	-6.50644	3.38e-14	6.59e-13
CNTD2	121.34	2.11438	-5.76448	3.39e-14	6.6e-13
RP5-984P4.6	1.39e-17	92.8313	9.54046	3.51e-14	6.81e-13
CKMT1A	91.952	1.39e-17	-9.52689	3.51e-14	6.81e-13
KB-1562D12.1	91.952	1.39e-17	-9.52689	3.51e-14	6.81e-13
ZNRF1	2858.23	256.333	-3.47842	3.61e-14	7.01e-13
IKZF2	577.33	42.1985	-3.77035	3.61e-14	7.01e-13
MAPKAPK2	3737.97	339.666	-3.45961	3.68e-14	7.13e-13
TMEM255A	1.89147	121.312	5.90906	3.95e-14	7.66e-13
PRSS35	8.52759	194.097	4.48768	3.98e-14	7.71e-13
IGSF3	9890.52	927.216	-3.4149	3.99e-14	7.71e-13
FLG-AS1	0.943449	107.599	6.64972	4.01e-14	7.75e-13
MTCL1	140.3	1604.43	3.51425	4.08e-14	7.89e-13
CTA-292E10.6	181.064	6.3337	-4.81121	4.16e-14	8.03e-13
STRIP2	25.5917	381.86	3.89248	4.17e-14	8.04e-13
CDH3	3218.47	292.198	-3.46082	4.19e-14	8.08e-13
ADGRB3	1.39e-17	91.7764	9.524	4.26e-14	8.18e-13
LINC00452	1.39e-17	91.7764	9.524	4.26e-14	8.18e-13
CTRB2	90.056	1.39e-17	-9.49687	4.26e-14	8.18e-13
DES	1.39e-17	91.7764	9.524	4.26e-14	8.18e-13
RGS7	1.39e-17	91.7764	9.524	4.26e-14	8.18e-13
LFNG	1250.41	106.544	-3.5514	4.32e-14	8.29e-13
PCDHGA1	132.716	3.1692	-5.33579	4.59e-14	8.8e-13
DIRC3	119.444	2.11438	-5.74179	4.61e-14	8.84e-13
ARL4A	48.3438	623.42	3.68523	4.79e-14	9.18e-13
ARID5B	1222.92	104.435	-3.54815	4.85e-14	9.28e-13
EID3	4.73555	145.574	4.9044	4.87e-14	9.3e-13
ZNF608	3.78753	145.574	5.21711	4.87e-14	9.3e-13
FANK1	191.492	7.38854	-4.67354	4.87e-14	9.3e-13
CTSV	21.7997	335.446	3.93569	4.9e-14	9.34e-13
FAM120AOS	2852.54	260.552	-3.452	5.13e-14	9.78e-13
LRFN5	1.39e-17	90.7216	9.50734	5.19e-14	9.87e-13
ZFP37	1.39e-17	90.7216	9.50734	5.19e-14	9.87e-13
RIMKLA	89.108	1.39e-17	-9.48163	5.19e-14	9.87e-13
RAB3IL1	53.0838	674.053	3.66327	5.23e-14	9.94e-13
RP11-347C18.3	118.496	2.11438	-5.7303	5.39e-14	1.02e-12
FA2H	375.405	24.2661	-3.9448	5.44e-14	1.03e-12
CNTN1	0.943449	105.489	6.62118	5.66e-14	1.07e-12
ABCC9	0.943449	105.489	6.62118	5.66e-14	1.07e-12
GLT8D2	14.2156	257.388	4.16601	5.68e-14	1.08e-12
LARP6	67.3039	815.402	3.5962	5.95e-14	1.13e-12
EGF	9.4756	201.481	4.39159	6.12e-14	1.16e-12
DSE	216.14	2360.76	3.44842	6.22e-14	1.18e-12
NR2F1	154.52	4.22403	-5.15376	6.28e-14	1.19e-12
CTD-2538C1.2	154.52	4.22403	-5.15376	6.28e-14	1.19e-12
RP11-434E6.4	88.16	1.39e-17	-9.46622	6.32e-14	1.19e-12
LINC01204	1.39e-17	89.6667	9.49049	6.32e-14	1.19e-12
PRR16	1.39e-17	89.6667	9.49049	6.32e-14	1.19e-12
CMTM3	43.6038	562.239	3.6847	6.4e-14	1.21e-12
PLCXD2	16.1116	277.43	4.09505	6.42e-14	1.21e-12
HIST1H2BG	498.645	36.9243	-3.75106	6.46e-14	1.22e-12
ZCWPW2	15.1636	266.881	4.12592	6.53e-14	1.23e-12
PRRG2	329.901	21.1016	-3.95898	6.62e-14	1.24e-12
RP5-823G15.5	103.328	1.05956	-6.45451	6.74e-14	1.26e-12
MTUS1	455.037	32.7049	-3.79352	6.77e-14	1.27e-12
RTN4RL1	1316.77	116.038	-3.50299	6.78e-14	1.27e-12
KLF2	24.6437	361.818	3.86891	6.92e-14	1.3e-12
YPEL2	1717.78	155.067	-3.46857	6.95e-14	1.3e-12
SLC36A4	109.016	1241.56	3.50797	7.2e-14	1.35e-12
TNFRSF10C	187.7	7.38854	-4.6447	7.33e-14	1.37e-12
S1PR5	18.9557	308.02	4.01309	7.39e-14	1.38e-12
TRIB2	27.4877	391.353	3.82529	7.51e-14	1.4e-12
ZNF219	1812.58	164.561	-3.4604	7.63e-14	1.42e-12
GLYATL1	1.39e-17	88.6119	9.47344	7.72e-14	1.44e-12
MYEOV	297.669	3162.44	3.40869	7.95e-14	1.48e-12
PTGDS	0.943449	103.38	6.59207	8.03e-14	1.49e-12
NCKAP5	102.38	1.05956	-6.44123	8.03e-14	1.49e-12
MYBBP1A	562.162	5872.35	3.38458	8.08e-14	1.5e-12
HAGLR	28.4357	400.847	3.81117	8.08e-14	1.5e-12
REEP2	18.0077	295.362	4.02607	8.11e-14	1.5e-12
PRKD1	29.3837	410.341	3.79783	8.25e-14	1.53e-12
LMX1B	974.543	83.3376	-3.5458	8.52e-14	1.58e-12
HIST2H2BF	185.804	7.38854	-4.63007	9.02e-14	1.67e-12
FAM83F	127.028	3.1692	-5.27266	9.41e-14	1.74e-12
LRAT	2.8395	128.696	5.43928	9.41e-14	1.74e-12
CASP14	86.2639	1.39e-17	-9.4349	9.45e-14	1.74e-12
RP11-32B5.7	1.39e-17	87.557	9.45619	9.45e-14	1.74e-12
BNC1	38.8638	510.551	3.71111	9.55e-14	1.76e-12
ACTN2	0.943449	102.325	6.57729	9.58e-14	1.77e-12
SLC27A3	785.89	65.4052	-3.58444	9.59e-14	1.77e-12
NOTCH3	6330.76	612.872	-3.36847	9.92e-14	1.83e-12
NOX5	150.728	4.22403	-5.11795	1.03e-13	1.9e-12
MOB3B	5.68356	151.903	4.7089	1.03e-13	1.9e-12
CH17-340M24.3	150.728	4.22403	-5.11795	1.03e-13	1.9e-12
RP11-429J17.7	227.516	11.6079	-4.27874	1.04e-13	1.9e-12
AKR1C2	404.793	28.4855	-3.82327	1.06e-13	1.94e-12
ERVMER34-1	48.3438	599.159	3.62797	1.07e-13	1.96e-12
LHX2	15.1636	259.497	4.08546	1.11e-13	2.03e-12
SPPL2A	3995.83	385.024	-3.37507	1.12e-13	2.06e-12
P3H3	69.1999	810.128	3.54683	1.13e-13	2.07e-12
ZNF135	1.39e-17	86.5022	9.43872	1.16e-13	2.11e-12
AUTS2	85.3159	1.39e-17	-9.41898	1.16e-13	2.11e-12
RP11-830F9.6	85.3159	1.39e-17	-9.41898	1.16e-13	2.11e-12
CST6	5.68356	150.848	4.69886	1.17e-13	2.14e-12
GBAP1	257.853	14.7725	-4.11459	1.19e-13	2.18e-12
ALDH2	37.9158	493.674	3.69813	1.26e-13	2.29e-12
HLA-C	341.277	3529.53	3.36996	1.29e-13	2.35e-12
HIST1H2AG	318.525	21.1016	-3.90837	1.3e-13	2.37e-12
SERPING1	18.0077	289.033	3.99484	1.3e-13	2.37e-12
LIFR	67.3039	784.812	3.54104	1.31e-13	2.39e-12
NABP1	104.276	1155.06	3.46786	1.34e-13	2.43e-12
RAB17	681.61	56.9664	-3.578	1.37e-13	2.49e-12
S100A7A	112.808	2.11438	-5.65941	1.4e-13	2.54e-12
DNAH10OS	112.808	2.11438	-5.65941	1.4e-13	2.54e-12
PARVG	1.39e-17	85.4473	9.42105	1.42e-13	2.57e-12
GADD45A	286.293	2957.8	3.36837	1.5e-13	2.71e-12
ZNF117	628.522	51.6922	-3.60089	1.5e-13	2.72e-12
DPY19L2P2	5.68356	148.738	4.67855	1.51e-13	2.73e-12
LRRC37A	10.4236	202.536	4.26333	1.59e-13	2.87e-12
HEG1	130.82	1402.95	3.42151	1.6e-13	2.88e-12
NXN	85.3159	955.697	3.48367	1.61e-13	2.91e-12
MICAL2	96.692	1061.18	3.45437	1.71e-13	3.09e-12
RP11-1038A11.3	168.74	6.3337	-4.70959	1.73e-13	3.12e-12
CHRM3	1.39e-17	84.3925	9.40315	1.75e-13	3.14e-12
AC126365.1	1.39e-17	84.3925	9.40315	1.75e-13	3.14e-12
KCNT2	1.39e-17	84.3925	9.40315	1.75e-13	3.14e-12
STAG3	97.64	1066.46	3.44746	1.88e-13	3.38e-12
KLHL29	40.7598	503.167	3.6216	1.89e-13	3.39e-12
PDE10A	12.3196	221.523	4.15415	1.9e-13	3.41e-12
NR5A2	220.88	11.6079	-4.23606	1.9e-13	3.41e-12
LPAR6	110.912	2.11438	-5.63499	1.94e-13	3.47e-12
ADGRG1	3653.6	360.763	-3.33977	1.96e-13	3.51e-12
RBP7	0.943449	98.1055	6.51661	1.97e-13	3.52e-12
AGAP2	331.797	22.1564	-3.89726	2.03e-13	3.63e-12
SDPR	1.39e-17	83.3376	9.38503	2.15e-13	3.84e-12
GPX7	1.39e-17	83.3376	9.38503	2.15e-13	3.84e-12
AC144831.1	82.4719	1.39e-17	-9.37015	2.15e-13	3.84e-12
OR2W3	1.39e-17	83.3376	9.38503	2.15e-13	3.84e-12
BATF3	1.39e-17	83.3376	9.38503	2.15e-13	3.84e-12
ELF1	4695.46	469.412	-3.32201	2.2e-13	3.93e-12
DNER	6.63157	156.122	4.53044	2.22e-13	3.95e-12
OASL	5.68356	145.574	4.64755	2.22e-13	3.95e-12
HYDIN	1.89147	110.764	5.77796	2.28e-13	4.06e-12
AC079613.1	96.692	1.05956	-6.35887	2.36e-13	4.2e-12
PCOLCE2	11.3716	208.865	4.18358	2.42e-13	4.29e-12
RP11-462G12.1	7.57958	166.671	4.43538	2.43e-13	4.32e-12
TMEM92	3.78753	133.97	5.09738	2.47e-13	4.38e-12
VN1R81P	9.4756	187.768	4.28996	2.47e-13	4.38e-12
SOWAHC	443.661	4402.94	3.31056	2.54e-13	4.5e-12
NMNAT2	76.7839	847.048	3.46135	2.56e-13	4.54e-12
HCFC1R1	426.597	4233.11	3.31038	2.59e-13	4.59e-12
ADAMTSL3	8.52759	176.164	4.34792	2.6e-13	4.6e-12
PCSK5	8.52759	176.164	4.34792	2.6e-13	4.6e-12
RP11-403B2.7	1.39e-17	82.2828	9.36668	2.65e-13	4.68e-12
RP11-138J23.1	81.5239	1.39e-17	-9.35349	2.65e-13	4.68e-12
CELF2	1.39e-17	82.2828	9.36668	2.65e-13	4.68e-12
ZNF395	882.587	79.1182	-3.47768	2.67e-13	4.71e-12
CDH15	1.89147	109.709	5.76417	2.7e-13	4.75e-12
TSC22D3	3390.06	339.666	-3.31867	2.76e-13	4.85e-12
CHST7	21.7997	306.966	3.80774	2.96e-13	5.2e-12
LINC00869	578.278	48.5276	-3.57164	2.97e-13	5.22e-12
FAXC	235.1	13.7176	-4.08738	3.02e-13	5.3e-12
CLIP3	52.1358	607.597	3.53948	3.07e-13	5.4e-12
TBX20	2.8395	120.257	5.34153	3.1e-13	5.44e-12
APPBP2	13739.4	1427.21	-3.26694	3.16e-13	5.54e-12
CDH22	1.39e-17	81.2279	9.34809	3.28e-13	5.75e-12
HIPK1	17555.1	1832.28	-3.2601	3.41e-13	5.96e-12
KIF13B	1015.31	94.941	-3.4171	3.41e-13	5.97e-12
TIMP2	299.565	2964.13	3.30611	3.42e-13	5.98e-12
CABP1	0.943449	95.9958	6.48529	3.42e-13	5.98e-12
LAMB3	315.681	3117.08	3.30312	3.44e-13	6e-12
PCDHGB2	151.676	5.27886	-4.81337	3.61e-13	6.3e-12
F7	151.676	5.27886	-4.81337	3.61e-13	6.3e-12
DHRS3	182.012	8.44339	-4.4107	3.73e-13	6.5e-12
IKBIP	255.009	2533.75	3.31199	3.74e-13	6.51e-12
ADAMTS10	4.73555	130.806	4.75022	3.77e-13	6.56e-12
WDR66	78.6799	847.048	3.42621	4.05e-13	7.04e-12
HUNK	79.6279	1.39e-17	-9.3196	4.06e-13	7.04e-12
AC002480.3	1.39e-17	80.1731	9.32926	4.06e-13	7.04e-12
PCDHB11	79.6279	1.39e-17	-9.3196	4.06e-13	7.04e-12
CALB1	1.39e-17	80.1731	9.32926	4.06e-13	7.04e-12
HERC1	1792.67	177.219	-3.33763	4.09e-13	7.1e-12
CCDC63	93.848	1.05956	-6.31585	4.13e-13	7.15e-12
P2RX7	1.89147	106.544	5.72199	4.46e-13	7.73e-12
SERTAD4	366.873	27.4306	-3.73562	4.49e-13	7.77e-12
C1orf21	1132.86	108.654	-3.38073	4.6e-13	7.96e-12
CYP1A1	210.452	11.6079	-4.16633	4.65e-13	8.04e-12
FBLN7	23.6957	318.569	3.74161	4.74e-13	8.19e-12
SH3PXD2B	166.844	1667.72	3.32029	4.76e-13	8.21e-12
CHRNB1	69.1999	754.221	3.44369	4.81e-13	8.3e-12
FAM181B	0.943449	93.8861	6.45327	4.98e-13	8.58e-12
PID1	0.943449	93.8861	6.45327	4.98e-13	8.58e-12
SPESP1	92.9	1.05956	-6.30123	4.98e-13	8.58e-12
PLEKHG4	254.061	2487.34	3.29069	5.03e-13	8.64e-12
SLC19A3	1.39e-17	79.1182	9.31018	5.04e-13	8.64e-12
CTD-3051D23.1	78.6799	1.39e-17	-9.30235	5.04e-13	8.64e-12
ALX1	1.39e-17	79.1182	9.31018	5.04e-13	8.64e-12
PTGIR	1.39e-17	79.1182	9.31018	5.04e-13	8.64e-12
USP2-AS1	10.4236	190.932	4.17826	5.14e-13	8.82e-12
YOD1	16.1116	250.004	3.94494	5.19e-13	8.9e-12
CCDC149	731.854	66.46	-3.45864	5.24e-13	8.98e-12
PCDHB10	104.276	2.11438	-5.54609	5.29e-13	9.05e-12
RP11-573G6.4	104.276	2.11438	-5.54609	5.29e-13	9.05e-12
TPST1	84.3679	891.352	3.39921	5.3e-13	9.06e-12
PLK2	1117.69	10487.3	3.2299	5.43e-13	9.28e-12
AP4B1	1487.41	147.683	-3.33118	5.43e-13	9.28e-12
BMF	522.346	44.3082	-3.55581	5.67e-13	9.68e-12
STARD9	18.0077	267.936	3.88554	5.75e-13	9.81e-12
THEMIS2	3.78753	127.641	5.02762	5.79e-13	9.87e-12
UPP1	22.7477	305.911	3.74171	5.88e-13	1e-11
SLC6A3	91.952	1.05956	-6.28645	6.03e-13	1.03e-11
FSD1	109.964	1127.64	3.35666	6.05e-13	1.03e-11
RP11-115J23.1	1.39e-17	78.0634	9.29085	6.26e-13	1.06e-11
CCK	1.39e-17	78.0634	9.29085	6.26e-13	1.06e-11
RAMP2-AS1	1.39e-17	78.0634	9.29085	6.26e-13	1.06e-11
CNRIP1	1.39e-17	78.0634	9.29085	6.26e-13	1.06e-11
TCF15	1.39e-17	78.0634	9.29085	6.26e-13	1.06e-11
RP11-603B24.1	1.39e-17	78.0634	9.29085	6.26e-13	1.06e-11
LINC00623	510.021	43.2534	-3.55603	6.27e-13	1.06e-11
ADGRE1	1.89147	104.435	5.69317	6.28e-13	1.06e-11
PRDM8	1.89147	104.435	5.69317	6.28e-13	1.06e-11
FRAT1	462.621	39.034	-3.56299	6.6e-13	1.12e-11
CHST10	79.6279	833.335	3.38542	6.92e-13	1.17e-11
ZNF22	60.6678	657.175	3.43447	6.93e-13	1.17e-11
CKMT1B	91.004	1.05956	-6.27152	7.3e-13	1.23e-11
ARMT1	6806.66	729.96	-3.22085	7.55e-13	1.27e-11
MZB1	145.04	5.27886	-4.74888	7.66e-13	1.29e-11
HRAT92	145.988	5.27886	-4.75827	7.66e-13	1.29e-11
NAP1L6	76.7839	1.39e-17	-9.26721	7.79e-13	1.31e-11
CTC-490E21.11	76.7839	1.39e-17	-9.26721	7.79e-13	1.31e-11
WT1	1.39e-17	77.0085	9.27125	7.79e-13	1.31e-11
RP11-701H24.7	1.39e-17	77.0085	9.27125	7.79e-13	1.31e-11
PCDHGA4	76.7839	1.39e-17	-9.26721	7.79e-13	1.31e-11
GNG2	1.39e-17	77.0085	9.27125	7.79e-13	1.31e-11
TMEM26	76.7839	1.39e-17	-9.26721	7.79e-13	1.31e-11
FUT9	14.2156	224.687	3.97008	8.26e-13	1.38e-11
IFNLR1	11.3716	195.152	4.08567	8.31e-13	1.39e-11
RASGRP2	10.4236	185.658	4.13787	8.53e-13	1.43e-11
CH17-189H20.1	694.882	64.3503	-3.43032	8.79e-13	1.47e-11
ARHGDIG	101.432	2.11438	-5.50624	8.87e-13	1.48e-11
AC156455.1	3.78753	124.477	4.99144	8.96e-13	1.5e-11
PODXL2	211.4	2025.31	3.2593	8.99e-13	1.5e-11
SLC15A2	193.388	10.5531	-4.18039	9.16e-13	1.53e-11
LINC01232	269.229	18.9919	-3.81697	9.19e-13	1.53e-11
BLNK	112.808	3.1692	-5.10157	9.25e-13	1.54e-11
ZBTB8B	2.8395	113.928	5.26361	9.25e-13	1.54e-11
TNNT2	30.3317	371.311	3.60806	9.87e-13	1.64e-11
BOLA3-AS1	8.52759	164.561	4.24969	9.88e-13	1.64e-11
MKRN2OS	143.144	5.27886	-4.72992	9.89e-13	1.64e-11
EVL	5724.04	620.256	-3.20585	1e-12	1.67e-11
PDCD4	4894.54	529.539	-3.20808	1.03e-12	1.71e-11
MAP1B	194.336	1857.59	3.25594	1.04e-12	1.72e-11
LINC01359	100.484	2.11438	-5.49271	1.06e-12	1.75e-11
DUSP1	200.972	1918.77	3.25428	1.06e-12	1.76e-11
CCDC106	40.7598	462.028	3.49857	1.07e-12	1.77e-11
GBP1	2.8395	112.873	5.2502	1.09e-12	1.8e-11
NDNF	2.8395	112.873	5.2502	1.09e-12	1.8e-11
SNAI1	7.57958	154.012	4.32151	1.12e-12	1.86e-11
DENND1C	575.434	52.747	-3.44453	1.2e-12	1.98e-11
GUCY1B3	3.78753	122.367	4.9668	1.2e-12	1.99e-11
NR4A2	228.464	14.7725	-3.94011	1.21e-12	1.99e-11
STC1	74.8879	1.39e-17	-9.2312	1.21e-12	2e-11
FERMT1	31.2797	376.586	3.58419	1.23e-12	2.02e-11
LIPE	19.9037	275.32	3.7813	1.25e-12	2.05e-11
CPSF1P1	5.68356	132.915	4.51643	1.26e-12	2.08e-11
FCGRT	10.4236	181.439	4.10473	1.29e-12	2.12e-11
C3orf14	4159.83	453.589	-3.19673	1.3e-12	2.14e-11
NEIL1	264.489	18.9919	-3.79135	1.32e-12	2.17e-11
LINC00942	16.1116	237.346	3.87002	1.34e-12	2.21e-11
RP5-1187M17.10	61.6158	644.517	3.38409	1.36e-12	2.24e-11
ASPHD1	95.744	948.313	3.30635	1.37e-12	2.25e-11
TOX2	15.1636	227.852	3.89793	1.42e-12	2.34e-11
TNFSF9	41.7078	463.083	3.4688	1.44e-12	2.36e-11
FYN	76.7839	776.373	3.33567	1.45e-12	2.37e-11
DRAM1	4677.44	514.771	-3.18342	1.46e-12	2.39e-11
EMILIN2	17.0597	245.784	3.83855	1.48e-12	2.43e-11
BTBD19	9.4756	170.89	4.15418	1.5e-12	2.45e-11
B3GNT9	188.648	10.5531	-4.14461	1.5e-12	2.45e-11
MLC1	1.89147	99.1603	5.61849	1.51e-12	2.46e-11
RRN3P1	1.39e-17	74.8988	9.23124	1.52e-12	2.47e-11
ELF5	73.9399	1.39e-17	-9.21286	1.52e-12	2.47e-11
KCCAT211	73.9399	1.39e-17	-9.21286	1.52e-12	2.47e-11
U47924.27	73.9399	1.39e-17	-9.21286	1.52e-12	2.47e-11
MEOX2	1.39e-17	74.8988	9.23124	1.52e-12	2.47e-11
CTA-392E5.1	73.9399	1.39e-17	-9.21286	1.52e-12	2.47e-11
CTD-2113L7.1	1.39e-17	74.8988	9.23124	1.52e-12	2.47e-11
DOCK11	20.8517	281.649	3.74737	1.55e-12	2.52e-11
SFXN2	1250.41	129.751	-3.2674	1.59e-12	2.59e-11
DENND3	182.96	1720.46	3.23228	1.6e-12	2.59e-11
PROM2	3107.55	339.666	-3.19314	1.61e-12	2.61e-11
MIR4435-2HG	156.416	1479.96	3.24102	1.64e-12	2.66e-11
BRSK1	26.5397	325.953	3.61196	1.69e-12	2.73e-11
RUNDC3A-AS1	108.068	3.1692	-5.03971	1.77e-12	2.86e-11
RP5-1086K13.1	109.016	3.1692	-5.05229	1.77e-12	2.86e-11
GLS	831.395	7405.04	3.1547	1.82e-12	2.94e-11
HSPA13	760.294	6768.97	3.15409	1.89e-12	3.05e-11
NOTCH4	12.3196	196.206	3.97917	1.89e-12	3.05e-11
NEXN	6.63157	139.245	4.36552	1.9e-12	3.06e-11
ZDHHC15	1.39e-17	73.844	9.21081	1.91e-12	3.08e-11
RP11-505K9.4	72.9919	1.39e-17	-9.19427	1.91e-12	3.08e-11
ACSL1	2247.71	244.729	-3.19857	1.92e-12	3.09e-11
KLHL35	54.9798	580.171	3.39642	1.92e-12	3.09e-11
RP11-353N14.5	85.3159	1.05956	-6.17854	1.95e-12	3.12e-11
WI2-87327B8.2	0.943449	86.5022	6.33525	1.95e-12	3.12e-11
RP11-673E1.3	0.943449	86.5022	6.33525	1.95e-12	3.12e-11
SYT8	85.3159	1.05956	-6.17854	1.95e-12	3.12e-11
SMG1P4	85.3159	1.05956	-6.17854	1.95e-12	3.12e-11
CDKN1A	8404.05	952.533	-3.14108	1.96e-12	3.14e-11
NAV2	763.138	75.9537	-3.32672	1.97e-12	3.15e-11
MANSC1	763.138	75.9537	-3.32672	1.97e-12	3.15e-11
PHLDA3	3878.28	431.438	-3.16784	2e-12	3.21e-11
GALNT6	2487.56	272.156	-3.19166	2.01e-12	3.21e-11
GAL	23.6957	295.362	3.63253	2.04e-12	3.26e-11
LRRC37A2	50.2398	534.813	3.40875	2.06e-12	3.29e-11
FBXW4	1694.08	182.493	-3.21374	2.14e-12	3.42e-11
IL2RB	1.89147	97.0506	5.58751	2.15e-12	3.44e-11
DERL3	4.73555	118.148	4.60352	2.2e-12	3.51e-11
TAP2	91.952	899.79	3.2888	2.22e-12	3.54e-11
IFI6	102.38	986.288	3.26643	2.23e-12	3.56e-11
RP11-834C11.4	30.3317	355.489	3.54526	2.33e-12	3.71e-11
AC005077.14	220.88	14.7725	-3.89143	2.37e-12	3.77e-11
SLC2A9	0.943449	85.4473	6.31758	2.38e-12	3.78e-11
IL17C	72.0439	1.39e-17	-9.17544	2.4e-12	3.81e-11
AC226118.1	1.39e-17	72.7891	9.19009	2.4e-12	3.81e-11
KRT34	1.39e-17	72.7891	9.19009	2.4e-12	3.81e-11
SH3GL2	1.39e-17	72.7891	9.19009	2.4e-12	3.81e-11
ZNF69	72.0439	1.39e-17	-9.17544	2.4e-12	3.81e-11
LINC01213	71.0959	1.39e-17	-9.15637	2.4e-12	3.81e-11
LAMA4	1.39e-17	72.7891	9.19009	2.4e-12	3.81e-11
TCP11	2.8395	107.599	5.18124	2.45e-12	3.89e-11
DEPDC7	6.63157	137.135	4.34351	2.47e-12	3.91e-11
ATP10D	34.1237	389.244	3.50682	2.48e-12	3.92e-11
SYDE1	71.0959	712.027	3.32172	2.53e-12	3.99e-11
PPP4R4	5.68356	127.641	4.45807	2.55e-12	4.03e-11
KLF6	337.485	3011.6	3.15714	2.56e-12	4.04e-11
LAT2	27.4877	327.008	3.56623	2.7e-12	4.25e-11
MPP6	168.74	1546.41	3.19506	2.7e-12	4.26e-11
SOX4	8059.92	929.326	-3.11635	2.77e-12	4.37e-11
MINOS1	342.225	28.4855	-3.58111	2.78e-12	4.38e-11
RP11-495P10.1	200.972	12.6628	-3.97563	2.81e-12	4.42e-11
KCNN1	2.8395	106.544	5.16704	2.9e-12	4.56e-11
C6orf118	0.943449	84.3925	6.29968	2.91e-12	4.58e-11
MFI2	123.236	1154.01	3.2258	2.93e-12	4.61e-11
SLC44A3	253.113	18.9919	-3.72796	2.97e-12	4.66e-11
CD101	70.1479	1.39e-17	-9.13704	3.03e-12	4.75e-11
FNDC1	1.39e-17	71.7343	9.16906	3.03e-12	4.75e-11
PEG10	802.007	6969.39	3.11914	3.03e-12	4.75e-11
PRRG4	720.478	72.7891	-3.30504	3.09e-12	4.83e-11
BTBD11	94.796	2.11438	-5.40875	3.1e-12	4.85e-11
SMIM19	452.193	41.1437	-3.4544	3.21e-12	5.03e-11
TMEM173	56.8758	582.281	3.35285	3.23e-12	5.05e-11
SYNPO2	9.4756	163.506	4.0905	3.28e-12	5.12e-11
THBS1	478.737	4167.71	3.1216	3.44e-12	5.37e-11
C15orf41	72.9919	716.247	3.29234	3.54e-12	5.52e-11
TESC	17.0597	234.181	3.76882	3.56e-12	5.55e-11
TRIQK	2662.94	301.691	-3.14137	3.58e-12	5.59e-11
PRDM16	46.4478	484.18	3.37821	3.7e-12	5.76e-11
MEGF9	1563.25	173	-3.17483	3.7e-12	5.77e-11
KRTAP5-AS1	93.848	2.11438	-5.39427	3.73e-12	5.8e-11
DEGS1	420.909	3665.6	3.12207	3.76e-12	5.85e-11
RP11-734I18.1	69.1999	1.39e-17	-9.11744	3.82e-12	5.93e-11
FOXF2	1.39e-17	70.6794	9.14773	3.82e-12	5.93e-11
LINC00526	1.39e-17	70.6794	9.14773	3.82e-12	5.93e-11
RP11-108K3.1	69.1999	1.39e-17	-9.11744	3.82e-12	5.93e-11
SOX1	1.39e-17	70.6794	9.14773	3.82e-12	5.93e-11
RRM2B	5133.43	594.939	-3.10886	3.85e-12	5.96e-11
RND2	24.6437	294.307	3.57108	3.86e-12	5.99e-11
TRIM29	35.0717	388.189	3.46352	4.02e-12	6.22e-11
DNAJC27-AS1	103.328	3.1692	-4.97508	4.05e-12	6.27e-11
ZNF781	2.8395	104.435	5.13822	4.05e-12	6.27e-11
SMPD5	2.8395	104.435	5.13822	4.05e-12	6.27e-11
RP11-174G6.5	178.22	10.5531	-4.06263	4.15e-12	6.41e-11
OPRK1	0.943449	82.2828	6.26321	4.39e-12	6.76e-11
CTD-2396E7.11	81.5239	1.05956	-6.11305	4.39e-12	6.76e-11
RFPL1S	0.943449	82.2828	6.26321	4.39e-12	6.76e-11
PNMA6B	1.89147	93.8861	5.53974	4.48e-12	6.9e-11
RRAD	1.89147	93.8861	5.53974	4.48e-12	6.9e-11
PAPLN	122.288	4.22403	-4.81657	4.54e-12	6.99e-11
RPS6KB1	10224.2	1213.08	-3.07512	4.73e-12	7.28e-11
SCN4B	3.78753	113.928	4.86381	4.77e-12	7.33e-11
FOLR1	18.0077	239.455	3.72348	4.8e-12	7.37e-11
RPS6KA2	68.2519	1.39e-17	-9.09758	4.84e-12	7.41e-11
GPR158	68.2519	1.39e-17	-9.09758	4.84e-12	7.41e-11
BBS5	68.2519	1.39e-17	-9.09758	4.84e-12	7.41e-11
EYA1	1.39e-17	69.6246	9.12607	4.84e-12	7.41e-11
CHST9	1.39e-17	69.6246	9.12607	4.84e-12	7.41e-11
CTD-2554C21.2	1.39e-17	69.6246	9.12607	4.84e-12	7.41e-11
RP3-510D11.2	68.2519	1.39e-17	-9.09758	4.84e-12	7.41e-11
LRRN4	1.39e-17	69.6246	9.12607	4.84e-12	7.41e-11
TMCO3	2898.04	334.392	-3.11501	4.84e-12	7.41e-11
ABHD17C	1772.76	200.426	-3.1441	5.09e-12	7.77e-11
DDX11L2	20.8517	264.772	3.65825	5.12e-12	7.82e-11
ANKRD6	35.0717	383.969	3.44776	5.16e-12	7.87e-11
SLC27A2	542.254	53.8019	-3.33036	5.16e-12	7.87e-11
KCTD7	86.2639	811.183	3.23125	5.18e-12	7.89e-11
SSC5D	5.68356	122.367	4.39724	5.26e-12	8e-11
P2RX5	5.68356	122.367	4.39724	5.26e-12	8e-11
TTC3P1	121.34	4.22403	-4.80535	5.26e-12	8e-11
DDB2	2151.02	246.839	-3.12276	5.33e-12	8.11e-11
RP11-191G24.1	80.5759	1.05956	-6.0962	5.4e-12	8.19e-11
RP11-675F6.4	80.5759	1.05956	-6.0962	5.4e-12	8.19e-11
PAX5	80.5759	1.05956	-6.0962	5.4e-12	8.19e-11
RP11-96D1.6	80.5759	1.05956	-6.0962	5.4e-12	8.19e-11
C20orf195	4.73555	112.873	4.53771	5.58e-12	8.46e-11
FAM83H-AS1	2935.01	341.776	-3.1018	5.6e-12	8.49e-11
PRRG1	32.2277	356.543	3.46242	5.62e-12	8.52e-11
AC005618.6	101.432	3.1692	-4.9484	5.7e-12	8.62e-11
KCNH2	101.432	3.1692	-4.9484	5.7e-12	8.62e-11
ZNF750	101.432	3.1692	-4.9484	5.7e-12	8.62e-11
HIST1H2BN	148.832	7.38854	-4.31022	5.81e-12	8.78e-11
PROCR	65.4079	631.859	3.26949	5.89e-12	8.9e-11
SYT12	1593.59	180.384	-3.14229	5.89e-12	8.9e-11
CTC-457E21.5	1.39e-17	68.5697	9.10408	6.14e-12	9.27e-11
FOXL2	1.39e-17	68.5697	9.10408	6.14e-12	9.27e-11
AC093162.5	183.908	11.6079	-3.97195	6.16e-12	9.28e-11
CHORDC1	550.786	4639.23	3.07402	6.23e-12	9.38e-11
ABLIM3	40.7598	421.944	3.36768	6.25e-12	9.41e-11
HDX	1.89147	91.7764	5.50699	6.52e-12	9.81e-11
FCGR1A	91.004	2.11438	-5.34994	6.52e-12	9.81e-11
AC022007.5	217.088	15.8273	-3.76773	6.53e-12	9.82e-11
SERPINF2	7.57958	139.245	4.17621	6.54e-12	9.82e-11
JPH2	8.52759	148.738	4.10395	6.57e-12	9.86e-11
RASSF2	44.5518	453.589	3.34404	6.63e-12	9.95e-11
TMEM154	377.301	34.8146	-3.43347	6.64e-12	9.96e-11
SLC2A10	1814.47	208.865	-3.11818	6.65e-12	9.96e-11
LINC00475	79.6279	1.05956	-6.07916	6.65e-12	9.96e-11
C8orf31	0.943449	80.1731	6.22579	6.65e-12	9.96e-11
TUBA4A	97.64	890.297	3.18703	6.88e-12	1.03e-10
KRT15	173.48	10.5531	-4.02377	7.01e-12	1.05e-10
CYP4V2	417.117	40.0888	-3.37531	7.18e-12	1.07e-10
NEK5	164.948	9.49823	-4.10119	7.19e-12	1.07e-10
HPCA	6.63157	129.751	4.26373	7.34e-12	1.1e-10
AZIN1-AS1	146.936	7.38854	-4.29174	7.43e-12	1.11e-10
CRYM	7.57958	138.19	4.16525	7.45e-12	1.11e-10
MGAT5B	24.6437	284.814	3.52379	7.47e-12	1.11e-10
MEIS2	78.6799	731.015	3.2137	7.51e-12	1.12e-10
JUN	346.965	2931.43	3.07826	7.64e-12	1.14e-10
CSDE1	85393.3	10441.9	-3.03172	7.73e-12	1.15e-10
REXO2	227.516	1948.31	3.09745	7.75e-12	1.15e-10
PLD5	1.39e-17	67.5149	9.08176	7.81e-12	1.16e-10
SLC14A1	66.3559	1.39e-17	-9.05701	7.81e-12	1.16e-10
RP11-366H4.1	1.39e-17	67.5149	9.08176	7.81e-12	1.16e-10
BAGE2	66.3559	1.39e-17	-9.05701	7.81e-12	1.16e-10
LINC00937	1.39e-17	67.5149	9.08176	7.81e-12	1.16e-10
PGLYRP2	66.3559	1.39e-17	-9.05701	7.81e-12	1.16e-10
ZCCHC12	1.39e-17	67.5149	9.08176	7.81e-12	1.16e-10
HTRA3	1.39e-17	67.5149	9.08176	7.81e-12	1.16e-10
ZNF582	1.39e-17	67.5149	9.08176	7.81e-12	1.16e-10
RP11-603B24.2	1.39e-17	67.5149	9.08176	7.81e-12	1.16e-10
ACPP	90.056	2.11438	-5.33485	7.88e-12	1.16e-10
C2orf70	1.89147	90.7216	5.49034	7.88e-12	1.16e-10
ZFP82	50.2398	498.948	3.30863	8e-12	1.18e-10
SLC1A3	2.8395	100.215	5.07879	8.05e-12	1.19e-10
CEP170	340.329	2866.03	3.07356	8.12e-12	1.2e-10
AC093673.5	25.5917	291.143	3.50131	8.17e-12	1.2e-10
ATP1A1-AS1	118.496	4.22403	-4.77117	8.19e-12	1.21e-10
LINC00271	78.6799	1.05956	-6.06191	8.21e-12	1.21e-10
OCA2	0.943449	79.1182	6.20671	8.21e-12	1.21e-10
DMRTA2	0.943449	79.1182	6.20671	8.21e-12	1.21e-10
CRMP1	0.943449	79.1182	6.20671	8.21e-12	1.21e-10
GPX3	150.728	1314.35	3.12322	8.27e-12	1.22e-10
MYO7A	50.2398	497.893	3.30558	8.31e-12	1.22e-10
SLC34A3	180.116	11.6079	-3.94191	8.34e-12	1.22e-10
MRC2	154.52	1341.77	3.1172	8.98e-12	1.32e-10
FHL1	345.069	2885.02	3.06314	9.41e-12	1.38e-10
LRRIQ1	1.89147	89.6667	5.47349	9.54e-12	1.4e-10
KCNA4	1.39e-17	66.46	9.05908	9.96e-12	1.45e-10
APOBEC3D	1.39e-17	66.46	9.05908	9.96e-12	1.45e-10
CTD-3247F14.2	65.4079	1.39e-17	-9.03629	9.96e-12	1.45e-10
PDCD1LG2	1.39e-17	66.46	9.05908	9.96e-12	1.45e-10
PCP4	65.4079	1.39e-17	-9.03629	9.96e-12	1.45e-10
RP13-766D20.2	65.4079	1.39e-17	-9.03629	9.96e-12	1.45e-10
RP11-146I2.1	65.4079	1.39e-17	-9.03629	9.96e-12	1.45e-10
LINGO2	1.39e-17	66.46	9.05908	9.96e-12	1.45e-10
PCDHB4	65.4079	1.39e-17	-9.03629	9.96e-12	1.45e-10
AGR3	65.4079	1.39e-17	-9.03629	9.96e-12	1.45e-10
HIST1H1C	807.695	88.6119	-3.18651	1.01e-11	1.47e-10
ARHGEF37	236.996	18.9919	-3.63309	1.01e-11	1.48e-10
CYP2A6	77.7319	1.05956	-6.04445	1.02e-11	1.48e-10
SLC17A7	14.2156	196.206	3.77465	1.02e-11	1.49e-10
C6orf132	1952.88	231.016	-3.07888	1.02e-11	1.49e-10
MAPK12	138.404	1203.59	3.11918	1.02e-11	1.49e-10
B4GALT6	121.34	1065.4	3.1329	1.04e-11	1.51e-10
PCDHB5	17.0597	221.523	3.68869	1.04e-11	1.51e-10
BATF2	4.73555	108.654	4.4828	1.06e-11	1.53e-10
MB21D1	166.844	1426.16	3.09457	1.06e-11	1.54e-10
FAM227B	169.688	10.5531	-3.99191	1.07e-11	1.56e-10
MAN1A1	3646.02	443.041	-3.04047	1.11e-11	1.6e-10
TMPRSS5	6.63157	126.586	4.22814	1.12e-11	1.62e-10
BDKRB2	219.932	16.8822	-3.6941	1.13e-11	1.64e-10
ENHO	1.89147	88.6119	5.45644	1.16e-11	1.67e-10
ICAM1	205.712	1732.07	3.07299	1.18e-11	1.7e-10
MIR4458HG	9.4756	152.958	3.99436	1.18e-11	1.7e-10
ARSK	91.952	825.951	3.16529	1.2e-11	1.73e-10
SMARCA2	2655.35	320.679	-3.04923	1.21e-11	1.74e-10
PTPRH	32.2277	342.83	3.40585	1.21e-11	1.74e-10
FARP1	3595.77	438.822	-3.03425	1.23e-11	1.77e-10
RP11-958N24.2	10.4236	160.342	3.92652	1.26e-11	1.82e-10
COL6A4P1	64.4599	1.39e-17	-9.01527	1.27e-11	1.83e-10
ZFPM2-AS1	1.39e-17	65.4052	9.03604	1.27e-11	1.83e-10
PRICKLE2-AS1	64.4599	1.39e-17	-9.01527	1.27e-11	1.83e-10
SLC5A12	64.4599	1.39e-17	-9.01527	1.27e-11	1.83e-10
DNM1P46	1.39e-17	65.4052	9.03604	1.27e-11	1.83e-10
RP11-966I7.2	1.39e-17	65.4052	9.03604	1.27e-11	1.83e-10
CYP2S1	5.68356	116.038	4.3207	1.29e-11	1.85e-10
LRRC37A4P	6.63157	125.532	4.21608	1.29e-11	1.85e-10
XPA	364.029	34.8146	-3.38183	1.3e-11	1.86e-10
ADD3	149.78	1276.37	3.09002	1.3e-11	1.86e-10
NUDT18	620.938	66.46	-3.22158	1.33e-11	1.9e-10
GEM	32.2277	340.721	3.39695	1.35e-11	1.93e-10
FSTL3	188.648	1581.22	3.06639	1.39e-11	1.99e-10
MIR34AHG	200.024	14.7725	-3.74843	1.4e-11	2e-10
RPLP0P2	86.2639	2.11438	-5.27288	1.4e-11	2e-10
ALPP	1.89147	87.557	5.43918	1.4e-11	2e-10
CORO1C	1503.53	11967.3	2.99256	1.42e-11	2.03e-10
ZNF439	4.73555	106.544	4.45454	1.47e-11	2.09e-10
RADIL	52.1358	498.948	3.25532	1.49e-11	2.13e-10
RN7SL381P	75.8359	1.05956	-6.00888	1.56e-11	2.23e-10
ANGPTL8	75.8359	1.05956	-6.00888	1.56e-11	2.23e-10
GRIK3	75.8359	1.05956	-6.00888	1.56e-11	2.23e-10
NRXN2	2.8395	95.9958	5.01681	1.63e-11	2.31e-10
DLX6	1.39e-17	64.3503	9.01262	1.63e-11	2.31e-10
SPX	1.39e-17	64.3503	9.01262	1.63e-11	2.31e-10
NLRP3	1.39e-17	64.3503	9.01262	1.63e-11	2.31e-10
RP11-100E13.1	1.39e-17	64.3503	9.01262	1.63e-11	2.31e-10
CALR4P	63.5119	1.39e-17	-8.99394	1.63e-11	2.31e-10
B3GALT1	1.39e-17	64.3503	9.01262	1.63e-11	2.31e-10
TOX3	63.5119	1.39e-17	-8.99394	1.63e-11	2.31e-10
SYT16	7.57958	132.915	4.10915	1.65e-11	2.34e-10
CCBL1	39.8118	392.408	3.29686	1.67e-11	2.36e-10
EIF4E3	579.226	62.2406	-3.21573	1.79e-11	2.53e-10
TNFRSF13C	14.2156	190.932	3.73536	1.81e-11	2.56e-10
FRAS1	148.832	1246.84	3.0654	1.83e-11	2.58e-10
CDCA7	135.56	1141.35	3.07252	1.93e-11	2.72e-10
HRNR	0.943449	75.9537	6.14791	1.94e-11	2.75e-10
ZNF516	1248.52	148.738	-3.06835	1.97e-11	2.78e-10
ALPL	3.78753	104.435	4.73843	2.04e-11	2.88e-10
RP11-32B5.1	1.89147	85.4473	5.40404	2.08e-11	2.93e-10
CTD-2653D5.1	62.5639	1.39e-17	-8.97229	2.09e-11	2.95e-10
KHDRBS2	1.39e-17	63.2955	8.98882	2.09e-11	2.95e-10
TYRP1	62.5639	1.39e-17	-8.97229	2.09e-11	2.95e-10
SRI	202.868	1652.95	3.02562	2.22e-11	3.13e-10
TMEM52	10.4236	155.067	3.87831	2.24e-11	3.15e-10
NPW	31.2797	323.843	3.36658	2.26e-11	3.18e-10
COCH	109.016	930.381	3.09176	2.27e-11	3.18e-10
SCN8A	119.444	1007.38	3.07482	2.29e-11	3.21e-10
HCN4	11.3716	163.506	3.83059	2.31e-11	3.24e-10
KIF21B	26.5397	283.759	3.41205	2.35e-11	3.29e-10
RNF145	699.622	5483.11	2.97011	2.38e-11	3.33e-10
PEX11B	857.939	99.1603	-3.11151	2.38e-11	3.34e-10
IRF2BPL	3026.97	380.805	-2.99036	2.38e-11	3.34e-10
TEX15	3.78753	103.38	4.7238	2.41e-11	3.37e-10
ABCG4	3.78753	103.38	4.7238	2.41e-11	3.37e-10
TMEM45B	102.38	4.22403	-4.56051	2.41e-11	3.37e-10
CCDC3	0.943449	74.8988	6.12777	2.42e-11	3.39e-10
CKAP2L	184.856	1505.27	3.02466	2.45e-11	3.42e-10
FZD3	684.454	78.0634	-3.13029	2.57e-11	3.58e-10
HAP1	11.3716	162.451	3.82126	2.58e-11	3.6e-10
DOPEY2	2214.53	276.375	-3.00176	2.6e-11	3.63e-10
CISH	233.204	20.0467	-3.53233	2.64e-11	3.68e-10
RILP	31.2797	320.679	3.35242	2.69e-11	3.75e-10
RP11-27K13.3	61.6158	1.39e-17	-8.95031	2.69e-11	3.75e-10
MEOX1	1.39e-17	62.2406	8.96463	2.69e-11	3.75e-10
AF127577.8	61.6158	1.39e-17	-8.95031	2.69e-11	3.75e-10
CASP16P	127.976	6.3337	-4.31101	2.85e-11	3.96e-10
OSGIN1	557.422	61.1858	-3.185	2.89e-11	4.01e-10
RECK	65.4079	580.171	3.14639	2.99e-11	4.15e-10
ST8SIA1	0.943449	73.844	6.10734	3.02e-11	4.2e-10
FBXO32	425.649	44.3082	-3.26055	3.04e-11	4.21e-10
C14orf159	30.3317	310.13	3.3484	3.07e-11	4.27e-10
SLC44A5	1.89147	83.3376	5.36803	3.09e-11	4.29e-10
KAZALD1	1996.49	251.059	-2.99077	3.1e-11	4.3e-10
TSPAN15	3740.82	481.016	-2.95889	3.23e-11	4.47e-10
TP53BP2	489.165	3801.68	2.95791	3.24e-11	4.48e-10
PSD	109.964	4.22403	-4.66349	3.25e-11	4.5e-10
COTL1	798.215	6145.55	2.94449	3.27e-11	4.53e-10
TMEM164	2104.56	265.826	-2.9844	3.29e-11	4.54e-10
TIMP4	2.8395	92.8313	4.96851	3.36e-11	4.63e-10
RNF5P1	2.8395	92.8313	4.96851	3.36e-11	4.63e-10
DNAJC5G	2.8395	92.8313	4.96851	3.36e-11	4.63e-10
NACAD	2.8395	92.8313	4.96851	3.36e-11	4.63e-10
ODC1	717.634	5522.14	2.94368	3.37e-11	4.64e-10
PARD6A	100.484	4.22403	-4.53358	3.38e-11	4.65e-10
STAC3	100.484	4.22403	-4.53358	3.38e-11	4.65e-10
RUSC2	122.288	1009.49	3.04393	3.42e-11	4.7e-10
NPR3	51.1878	469.412	3.19372	3.44e-11	4.74e-10
CRABP1	60.6678	1.39e-17	-8.92798	3.48e-11	4.77e-10
ROBO4	1.39e-17	61.1858	8.94001	3.48e-11	4.77e-10
JMJD7-PLA2G4B	60.6678	1.39e-17	-8.92798	3.48e-11	4.77e-10
C1QTNF2	1.39e-17	61.1858	8.94001	3.48e-11	4.77e-10
RP3-325F22.5	60.6678	1.39e-17	-8.92798	3.48e-11	4.77e-10
BOC	117.548	5.27886	-4.44598	3.55e-11	4.87e-10
OSGIN2	1891.26	238.4	-2.98726	3.56e-11	4.89e-10
SCIN	40.7598	385.024	3.23562	3.6e-11	4.94e-10
CLSPN	207.608	1648.73	2.98863	3.65e-11	4.99e-10
ARMCX2	148.832	1202.53	3.01321	3.66e-11	5e-10
RNF144A	79.6279	679.327	3.09068	3.76e-11	5.15e-10
AC006273.5	1.89147	82.2828	5.34968	3.78e-11	5.17e-10
RP11-392P7.6	81.5239	2.11438	-5.19147	3.78e-11	5.17e-10
CTC-490E21.10	72.0439	1.05956	-5.93501	3.78e-11	5.17e-10
N4BP2L1	236.048	21.1016	-3.47625	3.85e-11	5.25e-10
GALC	977.387	7402.93	2.92093	3.94e-11	5.38e-10
TGFBI	200.024	1588.61	2.98869	3.97e-11	5.42e-10
PCDHB14	251.217	22.1564	-3.49607	3.98e-11	5.43e-10
ANKRD29	3.78753	100.215	4.679	4e-11	5.45e-10
C6orf141	781.15	92.8313	-3.07129	4.03e-11	5.49e-10
ITGA2	945.155	114.983	-3.03782	4.17e-11	5.67e-10
DEPTOR	891.119	107.599	-3.04855	4.3e-11	5.84e-10
NRG2	5.68356	108.654	4.22595	4.47e-11	6.07e-10
MMP1	1.39e-17	60.1309	8.91497	4.5e-11	6.11e-10
VGLL2	1.39e-17	60.1309	8.91497	4.5e-11	6.11e-10
RP11-44F14.2	59.7198	1.39e-17	-8.90531	4.5e-11	6.11e-10
CYP4B1	59.7198	1.39e-17	-8.90531	4.5e-11	6.11e-10
ATP6V1B1	140.3	8.44339	-4.03548	4.52e-11	6.13e-10
CBR3-AS1	156.416	10.5531	-3.8745	4.53e-11	6.14e-10
FOXF1	0.943449	71.7343	6.06559	4.74e-11	6.42e-10
LAMA2	0.943449	71.7343	6.06559	4.74e-11	6.42e-10
RP11-108M9.3	3.78753	99.1603	4.66375	4.75e-11	6.42e-10
IL17REL	98.588	4.22403	-4.50613	4.75e-11	6.42e-10
ATP6V0E2-AS1	4.73555	99.1603	4.35105	4.75e-11	6.42e-10
SPATA13	1093.99	136.08	-3.00597	4.85e-11	6.56e-10
ZNF343	89.108	3.1692	-4.76176	4.87e-11	6.57e-10
OTUD7A	26.5397	272.156	3.35184	4.91e-11	6.62e-10
SLC39A6	9444.01	1262.66	-2.90282	4.92e-11	6.65e-10
LRRC3	67.3039	579.116	3.10262	5.06e-11	6.83e-10
PSTPIP2	436.077	47.4728	-3.19619	5.08e-11	6.84e-10
[truncated: 7,263 more rows]
