# Supplementary material for: A positive feedback loop between ZEB2 and ACSL4 regulates lipid metabolism to promote breast cancer metastasis
Source: eLife. 2023 Dec 11;12:RP87510. doi: 10.7554/eLife.87510 (PMC10712958; doi:10.7554/eLife.87510)
Supplement: Figure 3—source data 1. [file elife-87510-fig3-data1.xlsx]

## Sheet: raw
name	Class	MainIon	mz	rtmin	IonFormula	M1-1	M1-2	M1-3	M1-4	T1-1	T1-2	T1-3	T1-4	si-T1-1	si-T1-2	si-T1-3	si-T1-4	QC1	QC2	QC3	QC4
AcCa(22:6)	AcCa	M+H	472.342	2.179	C29 H46 O4 N1	877095	0	584077	566055	2.57153e+06	2.52595e+06	796267	5.37237e+06	446115	713666	615602	607757	1.31303e+06	1.25456e+06	1.46894e+06	1.35168e+06
BisMePA(12:0e_18:1)	BisMePA	M+Na	655.467	14.2311	C35 H69 O7 N0 P1 Na1	2.5725e+06	1605.58	2.36178e+06	3.77625e+06	831000	619060	331533	1.63762e+06	1.12129e+06	912281	1.03941e+06	778245	1.29902e+06	1.37114e+06	1.69822e+06	1.50547e+06
BisMePA(16:2e_14:0)	BisMePA	M+NH4	648.496	12.9747	C35 H71 O7 N1 P1	339584	1425.68	274991	400869	2.67496e+06	2.28907e+06	571325	5.35509e+06	888006	1.48267e+06	621789	794556	1.16815e+06	1.18724e+06	1.50542e+06	1.29097e+06
BisMePA(16:2e_16:0)	BisMePA	M+NH4	676.528	14.3722	C37 H75 O7 N1 P1	5.99431e+06	110865	4.53658e+06	5.00908e+06	4.02439e+07	3.31738e+07	8.25726e+06	7.18311e+07	1.50453e+07	2.12035e+07	1.37748e+07	1.23509e+07	1.68319e+07	1.94515e+07	1.45163e+07	1.59666e+07
BisMePA(18:3e_14:0)	BisMePA	M+NH4	674.512	13.0558	C37 H73 O7 N1 P1	4.20451e+06	44169.2	3.27787e+06	4.6189e+06	2.56726e+07	2.18775e+07	7.39086e+06	1.71945e+07	7.93486e+06	1.06557e+07	4.42223e+06	7.00652e+06	1.00127e+07	8.53008e+06	1.00896e+07	8.74158e+06
BisMePA(18:2e_15:0)	BisMePA	M+NH4	690.543	15.022	C38 H77 O7 N1 P1	148781	0	28376	29146.9	2.9017e+06	2.41508e+06	502835	6.00938e+06	1.97798e+06	3.60825e+06	1.56773e+06	1.83394e+06	1.4394e+06	1.72347e+06	1.45297e+06	1.21503e+06
BisMePA(16:2e_17:1)	BisMePA	M+NH4	688.528	13.7391	C38 H75 O7 N1 P1	299063	8271.28	658357	170250	1.28808e+07	1.01684e+07	2.68193e+06	1.07015e+07	5.30223e+06	8.04283e+06	5.07479e+06	4.67751e+06	5.17128e+06	4.54665e+06	4.7727e+06	4.51478e+06
BisMePA(18:2e_16:0)	BisMePA	M+NH4	704.559	15.6415	C39 H79 O7 N1 P1	2.0164e+06	28489.9	2.01888e+06	2.26437e+06	5.51147e+07	4.56267e+07	8.9516e+06	7.68346e+07	2.80034e+07	4.43882e+07	2.48435e+07	2.27568e+07	2.0675e+07	2.60223e+07	2.39138e+07	2.32936e+07
BisMePA(16:2e_18:1)	BisMePA	M+NH4	702.543	14.4003	C39 H77 O7 N1 P1	2.73386e+07	630852	2.03265e+07	2.32889e+07	5.95105e+08	4.17772e+08	1.06914e+08	4.26187e+08	2.36283e+08	3.70727e+08	1.73336e+08	1.95339e+08	1.47518e+08	2.11071e+08	1.58094e+08	1.69631e+08
BisMePA(18:3e_16:1)	BisMePA	M+NH4	700.528	13.1102	C39 H75 O7 N1 P1	1.63211e+06	0	1.0332e+06	1.86828e+06	6.88093e+06	5.63362e+06	1.67178e+06	9.6824e+06	3.03303e+06	4.6201e+06	828520	2.954e+06	3.50668e+06	2.46129e+06	3.04747e+06	2.95582e+06
BisMePA(16:2e_18:2)	BisMePA	M+NH4	700.528	13.4713	C39 H75 O7 N1 P1	39403.1	0	16410.6	49054	5.65261e+06	3.48072e+06	989623	5.09955e+06	1.96908e+06	3.44626e+06	835093	2.47604e+06	3.10991e+06	1.86591e+06	1.2393e+06	2.73058e+06
BisMePA(16:2e_19:1)	BisMePA	M+NH4	716.559	15.0468	C40 H79 O7 N1 P1	761527	8529.38	1.00803e+06	1.22689e+06	2.53485e+07	2.17968e+07	4.58533e+06	2.44176e+07	1.18529e+07	1.80363e+07	9.66501e+06	9.46755e+06	8.58157e+06	1.04576e+07	8.95911e+06	8.03946e+06
BisMePA(20:2e_16:0)	BisMePA	M+NH4	732.59	16.7676	C41 H83 O7 N1 P1	927394	524.075	743929	870164	6.52146e+06	5.32167e+06	1.16412e+06	8.68811e+06	1.87394e+06	3.30789e+06	2.02925e+06	1.88451e+06	2.28626e+06	2.46208e+06	2.187e+06	2.29309e+06
BisMePA(18:2e_18:1)	BisMePA	M+NH4	730.575	15.6661	C41 H81 O7 N1 P1	8.01223e+06	124167	7.95643e+06	8.8616e+06	2.46218e+08	2.07735e+08	4.08745e+07	1.64487e+08	8.9739e+07	1.40903e+08	7.75982e+07	7.08492e+07	6.69196e+07	8.47454e+07	7.49725e+07	7.01051e+07
BisMePA(18:3e_18:1)	BisMePA	M+NH4	728.559	14.385	C41 H79 O7 N1 P1	1.06066e+07	138080	8.25306e+06	9.08917e+06	9.04349e+07	7.69012e+07	1.79771e+07	7.13158e+07	4.32472e+07	6.49638e+07	3.85672e+07	3.52398e+07	1.43233e+07	3.82972e+07	3.04881e+07	2.85337e+07
BisMePA(16:0_20:5)	BisMePA	M+NH4	740.522	12.3405	C41 H75 O8 N1 P1	1.82157e+08	4.45448e+06	1.3239e+08	1.93755e+08	3.94571e+07	3.30652e+07	1.25828e+07	5.34624e+07	3.79695e+07	5.28231e+07	3.20275e+07	4.60611e+07	7.82269e+07	6.0612e+07	7.24259e+07	6.78858e+07
BisMePA(16:2e_20:3)	BisMePA	M+NH4	726.543	13.5992	C41 H77 O7 N1 P1	4.01241e+06	71378.9	3.09475e+06	4.49806e+06	1.45063e+07	1.23891e+07	3.41442e+06	1.01484e+07	6.32489e+06	6.72981e+06	6.53371e+06	4.00315e+06	5.25861e+06	5.62628e+06	6.91924e+06	4.93339e+06
BisMePA(18:2e_19:1)	BisMePA	M+NH4	744.59	16.2283	C42 H83 O7 N1 P1	227695	0	261505	274723	7.16848e+06	7.09411e+06	1.46755e+06	8.77303e+06	3.08112e+06	4.98745e+06	2.83081e+06	2.58552e+06	2.74111e+06	3.48985e+06	1.04591e+06	2.59761e+06
BisMePA(20:2e_18:1)	BisMePA	M+NH4	758.606	16.7467	C43 H85 O7 N1 P1	6.43102e+06	79979.2	5.37556e+06	6.22996e+06	4.82223e+07	4.14773e+07	8.98999e+06	3.59261e+07	1.65938e+07	2.71733e+07	1.63165e+07	1.51176e+07	1.62069e+07	1.79083e+07	1.48157e+07	1.60699e+07
BisMePA(16:2e_22:2)	BisMePA	M+NH4	756.59	15.7954	C43 H83 O7 N1 P1	1.09488e+06	6585.65	1.10991e+06	1.47745e+06	9.62377e+06	7.13151e+06	2.07609e+06	1.8971e+07	3.68404e+06	1.3689e+07	7.25512e+06	6.14228e+06	2.21457e+06	6.42793e+06	2.43673e+06	8.19254e+06
BisMePA(18:0_20:5)	BisMePA	M+NH4	768.554	13.736	C43 H79 O8 N1 P1	5.60496e+08	2.1677e+07	4.30245e+08	6.83255e+08	2.13289e+08	1.70617e+08	4.88225e+07	3.62216e+08	2.46892e+08	3.4967e+08	2.31956e+08	1.60339e+08	3.09239e+08	2.63357e+08	2.93436e+08	2.72544e+08
BisMePA(16:2e_22:3)	BisMePA	M+NH4	754.575	14.9233	C43 H81 O7 N1 P1	1.5801e+06	4198.78	1.51742e+06	1.66137e+06	2.75658e+07	2.04639e+07	4.20777e+06	1.23138e+07	1.83926e+07	2.86374e+07	1.23776e+07	1.18729e+07	1.13807e+07	1.06243e+07	1.16545e+07	8.30205e+06
BisMePA(18:2e_20:3)	BisMePA	M+NH4	754.575	15.331	C43 H81 O7 N1 P1	276371	0	329943	358575	5.67677e+06	5.74193e+06	877023	4.21155e+06	1.94113e+06	2.75119e+06	1.55132e+06	1.49511e+06	1.60115e+06	2.03028e+06	1.71901e+06	1.81628e+06
BisMePA(18:3e_20:3)	BisMePA	M+NH4	752.559	13.9256	C43 H79 O7 N1 P1	2.45085e+06	1.17851e+06	1.99993e+06	2.34517e+06	3.95381e+07	3.56724e+07	9.849e+06	6.22512e+07	8.94625e+07	1.25035e+08	7.58904e+07	7.42349e+07	4.81144e+07	4.40934e+07	4.34771e+07	3.57795e+07
BisMePA(18:2e_20:4)	BisMePA	M+NH4	752.559	14.3377	C43 H79 O7 N1 P1	1.60087e+07	375464	1.3062e+07	1.5693e+07	2.06721e+08	1.80708e+08	4.33195e+07	2.2114e+08	1.35522e+08	1.89585e+08	1.20315e+08	1.143e+08	4.90823e+07	1.07036e+08	7.92103e+07	8.55e+07
BisMePA(18:3e_20:4)	BisMePA	M+NH4	750.543	13.4643	C43 H77 O7 N1 P1	1.45167e+06	14036.5	502809	253579	2.24719e+07	1.84653e+07	6.53244e+06	2.67707e+07	1.32396e+07	1.93147e+07	1.19477e+06	1.27879e+07	1.07447e+07	9.32743e+06	5.64263e+06	1.01583e+07
BisMePA(18:2e_21:1)	BisMePA	M+NH4	772.621	17.1334	C44 H87 O7 N1 P1	561885	0	365290	522747	2.93691e+06	2.21643e+06	399613	2.68691e+06	907835	1.59091e+06	810029	802137	800248	968249	803813	925078
BisMePA(18:2e_22:1)	BisMePA	M+NH4	786.637	17.5831	C45 H89 O7 N1 P1	2.25443e+06	2243.45	1.3509e+06	2.10081e+06	1.25799e+07	1.04139e+07	2.14778e+06	9.86976e+06	3.58691e+06	6.23771e+06	3.64675e+06	3.19838e+06	3.6856e+06	3.59022e+06	3.41784e+06	3.30513e+06
BisMePA(18:3e_22:1)	BisMePA	M+NH4	784.621	16.7467	C45 H87 O7 N1 P1	668433	0	606975	805655	8.47633e+06	4.24227e+06	525379	9.26651e+06	4.31176e+06	7.00291e+06	4.24095e+06	2.75385e+06	3.41526e+06	3.70446e+06	3.10412e+06	3.21237e+06
BisMePA(18:3e_22:2)	BisMePA	M+NH4	782.606	15.9647	C45 H85 O7 N1 P1	50166.2	0	40968.7	33819.3	2.86814e+06	2.41792e+06	512329	3.39424e+06	2.91143e+06	3.77095e+06	3.25064e+06	2.31217e+06	1.46857e+06	1.90277e+06	1.53198e+06	1.06322e+06
BisMePA(40:7)	BisMePA	M+NH4	792.554	11.622	C45 H79 O8 N1 P1	7.78151e+06	63154.1	5.06329e+06	1.41676e+06	5.88782e+06	4.20465e+06	793681	6.64581e+06	3.14846e+06	6.15303e+06	4.49896e+06	4.64528e+06	3.19689e+06	2.57687e+06	5.52211e+06	6.90602e+06
BisMePA(18:3e_22:4)	BisMePA	M+NH4	778.575	14.318	C45 H81 O7 N1 P1	4.30466e+06	112655	3.7252e+06	4.02123e+06	3.43551e+07	2.99767e+07	7.33252e+06	4.12017e+07	4.14089e+07	6.103e+07	3.66187e+07	3.39893e+07	1.23652e+07	2.46398e+07	1.76902e+07	2.08114e+07
BisMePA(18:3e_22:5)	BisMePA	M+NH4	776.559	12.985	C45 H79 O7 N1 P1	1.25856e+06	764954	1.86605e+06	2.97322e+06	6.26094e+06	4.1981e+06	1.64113e+06	8.07048e+06	1.03226e+07	1.22413e+07	4.57789e+06	1.0449e+07	6.61725e+06	4.63981e+06	6.94316e+06	3.88247e+06
BisMePA(18:3e_22:6)	BisMePA	M+NH4	774.543	12.588	C45 H77 O7 N1 P1	3.94768e+06	53500.5	3.10275e+06	3.96386e+06	5.07913e+07	4.25971e+07	1.48115e+07	4.79181e+07	3.79564e+07	5.72013e+07	4.24823e+07	4.36871e+07	2.93984e+07	2.5347e+07	2.0967e+07	3.03512e+07
BisMePA(18:3e_24:1)	BisMePA	M+NH4	812.653	17.547	C47 H91 O7 N1 P1	72555.6	0	56360.1	55471.6	1.91036e+06	1.56224e+06	275833	588688	501298	864732	395759	358572	422626	350773	340027	158529
BisMePE(20:1e_20:4)	BisMePE	M+H	808.621	16.708	C47 H87 O7 N1 P1	2.85226e+06	47087	2.39503e+06	2.90438e+06	361537	183892	14994.7	225975	170275	511120	295178	197851	707650	857763	738377	737382
BisMePS(27:5)	BisMePS	M+NH4	701.414	13.081	C35 H62 O10 N2 P1	1.35257e+07	3.1269e+07	1.129e+07	3.8225e+07	1.40469e+07	2.45832e+07	1.23575e+07	2.54759e+07	1.75602e+07	1.5786e+07	1.12607e+07	1.75014e+07	3.09334e+07	1.67611e+07	2.9938e+07	1.20767e+07
CL(68:4)	CL	M+H	1401.98	19.163	C77 H143 O17 P2	1.59127e+06	8092.5	1.09578e+06	1.83417e+06	363677	266355	8690.75	319138	41728.3	59554.7	272728	68896.5	478605	474457	227740	217413
CL(70:5)	CL	M+H	1428	19.215	C79 H145 O17 P2	1.23508e+06	0	883870	1.57192e+06	1.32446e+06	585172	9885.37	1.12859e+06	759906	561641	1.00894e+06	952000	645475	774476	740279	662342
CL(72:6)	CL	M+H	1454.01	19.2453	C81 H147 O17 P2	385983	0	148769	489317	1.10329e+06	948662	100859	1.47983e+06	851924	764250	1.23e+06	1.21032e+06	687398	701945	659058	581259
Cer(d26:0)	Cer	M+H	428.41	5.10807	C26 H54 O3 N1	1.50484e+06	577503	1.65507e+06	920260	1.23015e+06	1.11859e+06	1.1614e+06	788.79	864092	1.10678e+06	1.21317e+06	1.34263e+06	1.12011e+06	1.16913e+06	1.22023e+06	1.10922e+06
Cer(d28:0)	Cer	M+H	456.441	7.06885	C28 H58 O3 N1	9.50735e+07	6.17633e+07	8.00924e+07	6.19194e+07	8.11538e+07	5.42776e+07	7.71441e+07	52994.3	6.94088e+07	8.40418e+07	9.57036e+07	9.46129e+07	8.13299e+07	5.89157e+07	7.6305e+07	7.52763e+07
Cer(d30:0)	Cer	M+H	484.472	8.42788	C30 H62 O3 N1	9.87275e+07	6.37312e+07	8.28104e+07	6.54555e+07	1.06905e+08	6.30672e+07	1.00798e+08	166315	9.51902e+07	1.08589e+08	1.06865e+08	1.07764e+08	9.57321e+07	6.13608e+07	9.65753e+07	9.24546e+07
Cer(d12:0_18:0+O)	Cer	M+H	500.467	6.87025	C30 H62 O4 N1	8.82106e+06	6.10344e+06	8.74722e+06	5.28906e+06	8.03148e+06	5.74128e+06	8.09226e+06	23858.2	6.93235e+06	8.47634e+06	8.95077e+06	8.9417e+06	7.79747e+06	6.18866e+06	7.63418e+06	7.68973e+06
Cer(d30:1)	Cer	M+H	482.457	7.22689	C30 H60 O3 N1	1.60533e+06	1.28361e+06	1.87592e+06	1.23696e+06	1.8189e+06	1.15974e+06	2.10816e+06	11538	1.64095e+06	981213	1.74513e+06	1.8038e+06	1.69174e+06	1.06503e+06	1.63106e+06	1.61976e+06
Cer(d30:3)	Cer	M+H	478.425	7.10315	C30 H56 O3 N1	1.32469e+06	1.87913e+06	1.30566e+06	1.40627e+06	2.22977e+06	885482	1.09667e+06	0	1.89854e+06	3.11617e+06	2.13757e+06	938883	970003	966146	783962	988058
Cer(d18:0_14:0)	Cer	M+H	512.504	12.4094	C32 H66 O3 N1	1.53731e+06	225003	1.48109e+06	2.00039e+06	1.21059e+07	9.42608e+06	3.53052e+06	5.71539e+06	695842	591446	777478	653208	3.58877e+06	2.53571e+06	3.37662e+06	3.28355e+06
Cer(d14:0_18:0+O)	Cer	M+H	528.499	8.00566	C32 H66 O4 N1	2.17412e+06	1.47638e+06	1.83008e+06	1.60133e+06	2.07616e+06	1.21531e+06	2.10159e+06	33090.1	2.03805e+06	2.5589e+06	2.40493e+06	2.22052e+06	2.17117e+06	1.50106e+06	1.7802e+06	1.85011e+06
Cer(d32:1)	Cer	M+H	510.488	8.55762	C32 H64 O3 N1	4.80403e+06	7.97438e+06	4.88435e+06	3.47175e+06	4.16413e+06	2.13491e+06	5.14647e+06	1995.85	3.31011e+06	2.78365e+06	3.67015e+06	3.40707e+06	4.26117e+06	2.71314e+06	4.18743e+06	4.13422e+06
Cer(d18:1_14:0)	Cer	M+H	510.488	11.8897	C32 H64 O3 N1	3.41968e+06	144746	3.24355e+06	3.39965e+06	5.1412e+06	3.85282e+06	2.08211e+06	7.63717e+06	3.71059e+06	5.07599e+06	3.80656e+06	4.22477e+06	4.07759e+06	3.04855e+06	4.17576e+06	3.64088e+06
Cer(d18:2_14:0)	Cer	M+H	508.472	10.496	C32 H62 O3 N1	457021	0	384544	402706	619437	448829	104393	742773	221230	264153	309680	292134	371758	251257	311229	340098
Cer(d32:3)	Cer	M+H	506.457	8.42985	C32 H60 O3 N1	1.75927e+06	2.06111e+06	2.48984e+06	2.05479e+06	2.60633e+06	1.55107e+06	1.78545e+06	0	2.32608e+06	2.37473e+06	1.50461e+06	1.35822e+06	1.36622e+06	1.21936e+06	1.22963e+06	1.22708e+06
Cer(d17:1_16:0)	Cer	M+H	524.504	12.6361	C33 H66 O3 N1	3.68086e+06	85331.5	3.48925e+06	3.09338e+06	3.37853e+06	2.4573e+06	889861	4.23927e+06	2.17733e+06	2.35971e+06	2.30107e+06	2.57694e+06	2.43482e+06	2.4615e+06	2.67881e+06	3.38015e+06
Cer(d34:0)	Cer	M+H	540.535	11.5785	C34 H70 O3 N1	5.63615e+08	5.11203e+08	4.99843e+08	5.22677e+08	5.69741e+08	3.49848e+08	6.42264e+08	1.40988e+06	5.34043e+08	5.43629e+08	6.85583e+08	6.70959e+08	5.79458e+08	3.92333e+08	4.9518e+08	5.52293e+08
Cer(d18:0_16:0)	Cer	M+H	540.535	14.1205	C34 H70 O3 N1	6.54723e+06	204019	6.74643e+06	6.01551e+06	4.35058e+06	3.52157e+06	1.20146e+06	5.18066e+06	2.81033e+06	3.15879e+06	2.46355e+06	2.67079e+06	971579	3.65711e+06	3.21794e+06	2.3231e+06
Cer(d16:0_18:0+O)	Cer	M+H	556.53	9.28019	C34 H70 O4 N1	1.44703e+07	1.0912e+07	1.35647e+07	1.06418e+07	1.56016e+07	9.3597e+06	1.39854e+07	143982	1.60616e+07	1.87452e+07	1.58966e+07	1.49003e+07	1.31011e+07	1.04384e+07	1.26665e+07	1.24225e+07
Cer(d34:1)	Cer	M+H	538.519	10.0917	C34 H68 O3 N1	1.29088e+07	2.22267e+07	1.49698e+07	1.12587e+07	1.55467e+07	9.25439e+06	1.89079e+07	18505.3	1.35726e+07	1.14367e+07	1.37792e+07	1.32393e+07	1.47954e+07	9.71804e+06	1.41906e+07	1.28603e+07
Cer(d18:1_16:0)	Cer	M+H	538.519	13.3798	C34 H68 O3 N1	3.52983e+07	3.39334e+06	3.67856e+07	4.70242e+07	5.01852e+07	4.01063e+07	1.80151e+07	9.89491e+07	3.95578e+07	4.14585e+07	3.82089e+07	3.89923e+07	4.95003e+07	3.70029e+07	4.35397e+07	4.53022e+07
Cer(d34:2)	Cer	M+H	536.504	8.8474	C34 H66 O3 N1	577937	1.24509e+06	632644	451499	1.15471e+06	618740	1.70715e+06	1269.36	1.34509e+06	1.11559e+06	1.62544e+06	1.47723e+06	1.18374e+06	763232	1.09266e+06	1.08976e+06
Cer(d34:3)	Cer	M+H	534.488	9.94285	C34 H64 O3 N1	9.96359e+06	1.09546e+07	1.44703e+07	8.53143e+06	1.6404e+07	1.03643e+07	9.93962e+06	2795	1.52837e+07	1.60789e+07	1.10748e+07	1.07484e+07	8.03819e+06	1.04441e+07	9.37604e+06	8.78506e+06
Cer(d35:0)	Cer	M+H	554.551	12.393	C35 H72 O3 N1	9.04361e+06	2.12817e+07	7.5911e+06	1.45748e+07	9.35311e+06	1.11948e+07	1.6875e+07	6.22831e+06	1.07405e+07	1.12064e+07	1.05813e+07	1.10542e+07	9.71312e+06	6.2887e+06	9.07543e+06	8.88932e+06
Cer(d18:0_17:0)	Cer	M+H	554.551	14.4291	C35 H72 O3 N1	1.61913e+07	1.87887e+07	1.47616e+07	2.24905e+07	1.46731e+07	2.09318e+07	1.33108e+07	1.00328e+07	1.65666e+07	1.79611e+07	1.21965e+07	9.53921e+06	1.07109e+07	1.25073e+07	9.04629e+06	1.01273e+07
Cer(d18:1_17:0)	Cer	M+H	552.535	14.0837	C35 H70 O3 N1	2.95189e+06	16233.5	2.64432e+06	3.02066e+06	3.11143e+06	2.31236e+06	580871	8.7206e+06	2.52286e+06	2.91396e+06	2.23422e+06	2.28639e+06	2.19957e+06	2.52433e+06	2.57005e+06	1.94687e+06
Cer(d36:0)	Cer	M+H	568.566	13.1819	C36 H74 O3 N1	1.83531e+08	1.62487e+08	1.90054e+08	1.6553e+08	2.08487e+08	1.37548e+08	1.73509e+08	590230	1.84086e+08	2.06181e+08	1.87685e+08	7.47543e+07	1.6271e+08	1.63744e+08	1.30359e+08	1.60811e+08
Cer(d16:0_20:0+O)	Cer	M+H	584.561	10.676	C36 H74 O4 N1	1.01402e+07	1.06461e+07	8.77227e+06	8.83782e+06	1.4956e+07	9.16465e+06	1.53797e+07	34092.1	1.50775e+07	1.65222e+07	1.50802e+07	1.48895e+07	1.13127e+07	8.51785e+06	1.03439e+07	1.08134e+07
Cer(d36:1)	Cer	M+H	566.551	11.68	C36 H72 O3 N1	4.88056e+06	8.8699e+06	4.38071e+06	4.66062e+06	5.35777e+06	3.16911e+06	5.72652e+06	0	5.06736e+06	3.92317e+06	5.29636e+06	5.20801e+06	5.52484e+06	4.0553e+06	4.18545e+06	5.14509e+06
Cer(d18:1_18:0)	Cer	M+H	566.551	14.78	C36 H72 O3 N1	1.24495e+07	292576	1.24682e+07	1.22328e+07	3.14144e+07	2.21223e+07	5.15388e+06	5.98279e+07	1.85376e+07	2.24463e+07	1.70031e+07	1.52031e+07	1.54983e+07	1.93789e+07	1.52005e+07	1.54676e+07
Cer(d36:1+O)	Cer	M+H	582.546	9.79086	C36 H72 O4 N1	1.61163e+06	2.63153e+06	1.9174e+06	1.29102e+06	2.02262e+06	1.07991e+06	2.48156e+06	10398.1	1.67968e+06	1.56502e+06	1.71853e+06	1.66895e+06	1.67245e+06	1.27095e+06	1.72739e+06	1.58097e+06
Cer(d18:2_18:0)	Cer	M+H	564.535	13.4804	C36 H70 O3 N1	1.91982e+06	23056	2.06233e+06	2.05033e+06	3.79633e+06	2.57267e+06	768169	5.26707e+06	2.00208e+06	1.68488e+06	1.96216e+06	2.28945e+06	2.31657e+06	1.92367e+06	2.06036e+06	2.34582e+06
Cer(d36:3)	Cer	M+H	562.519	11.5879	C36 H68 O3 N1	1.95646e+06	1.0156e+07	2.81628e+06	2.28654e+06	3.48368e+06	2.19108e+06	1.04936e+07	0	5.4194e+06	3.97927e+06	4.55879e+06	4.42671e+06	2.38209e+06	2.66981e+06	2.62769e+06	2.30259e+06
Cer(d36:3+O)	Cer	M+H	578.514	9.65548	C36 H68 O4 N1	1.69331e+06	3.13631e+06	2.9458e+06	1.2272e+06	3.51789e+06	2.20885e+06	1.94296e+06	10176.2	3.42634e+06	3.76216e+06	1.74237e+06	1.95014e+06	1.43554e+06	2.18036e+06	1.53547e+06	1.51382e+06
Cer(d36:4)	Cer	M+H	560.504	8.58136	C36 H66 O3 N1	1.81699e+06	2.79731e+06	1.74682e+06	1.2286e+06	1.97873e+06	1.06663e+06	2.81626e+06	95173	2.87611e+06	2.17502e+06	3.38574e+06	3.14636e+06	2.47656e+06	1.52195e+06	2.37025e+06	2.35358e+06
Cer(d37:0)	Cer	M+H	582.582	13.9673	C37 H76 O3 N1	4.69216e+06	7.50526e+06	4.08161e+06	7.53803e+06	3.65739e+06	3.99981e+06	4.2409e+06	1.6459e+06	4.28104e+06	4.35906e+06	3.00659e+06	1.63082e+06	2.13195e+06	3.10028e+06	3.21329e+06	2.31927e+06
Cer(d18:0_19:0)	Cer	M+H	582.582	15.9605	C37 H76 O3 N1	2.81717e+06	4.87162e+06	3.13443e+06	5.05027e+06	3.86178e+06	4.81077e+06	3.12757e+06	2.04842e+06	5.09743e+06	5.06405e+06	3.52886e+06	2.44429e+06	2.65967e+06	2.59206e+06	2.5232e+06	2.11597e+06
Cer(d18:1_19:0)	Cer	M+H	580.566	15.4522	C37 H74 O3 N1	609318	6852.47	824110	689341	952363	718088	21869.6	2.20841e+06	769218	955923	591440	659395	556502	694840	605123	573310
Cer(d38:0)	Cer	M+H	596.598	14.7512	C38 H78 O3 N1	5.74344e+07	1.21714e+08	8.80912e+07	9.13641e+07	8.53473e+07	4.98909e+07	7.47133e+07	364660	9.8559e+07	1.03732e+08	5.59302e+07	6.04433e+07	2.74929e+07	6.73321e+07	3.9138e+07	5.50314e+07
Cer(d18:0_20:0)	Cer	M+H	596.598	16.4506	C38 H78 O3 N1	4.93723e+06	486596	4.48379e+06	4.21744e+06	3.64909e+07	2.85943e+07	6.52502e+06	1.80439e+07	3.04688e+06	4.08765e+06	2.93659e+06	3.06333e+06	7.07316e+06	7.6622e+06	7.56984e+06	6.37746e+06
Cer(d18:0_20:0+O)	Cer	M+H	612.593	12.049	C38 H78 O4 N1	709694	3.35728e+06	897062	135849	1.65545e+06	836477	507207	0	2.06657e+06	2.0227e+06	1.86232e+06	1.7594e+06	1.60625e+06	1.19581e+06	1.25867e+06	1.33135e+06
Cer(d38:1)	Cer	M+H	594.582	13.6006	C38 H76 O3 N1	5.99476e+06	7.59059e+06	7.1451e+06	6.01843e+06	6.03839e+06	3.1611e+06	9.34747e+06	0	6.29181e+06	8.74011e+06	4.8879e+06	1.13778e+07	2.57635e+06	4.32128e+06	4.22915e+06	6.91119e+06
Cer(d18:1_20:0)	Cer	M+H	594.582	16.054	C38 H76 O3 N1	5.19463e+06	117753	6.50572e+06	6.03763e+06	1.57752e+07	1.17511e+07	1.87079e+06	2.40785e+07	7.89556e+06	1.01003e+07	7.6414e+06	6.78226e+06	7.29355e+06	7.96366e+06	7.74856e+06	6.41585e+06
Cer(d18:2_20:0)	Cer	M+H	592.566	14.8041	C38 H74 O3 N1	1.05822e+06	4422.39	1.2811e+06	1.1425e+06	3.01619e+06	2.15535e+06	309161	2.77706e+06	1.10821e+06	1.18983e+06	915898	841143	1.01599e+06	1.18312e+06	999668	981887
Cer(d38:6)	Cer	M+H	584.504	8.17977	C38 H66 O3 N1	1.16571e+06	1.82319e+06	1.10861e+06	853660	1.17283e+06	654090	1.97176e+06	1046.98	1.28107e+06	956044	1.41999e+06	1.43011e+06	1.31389e+06	879770	1.22406e+06	1.29185e+06
Cer(d18:0_21:0)	Cer	M+H	610.613	16.976	C39 H80 O3 N1	439932	45487.7	499169	372460	1.56527e+06	1.07569e+06	134658	1.47758e+06	412278	639318	253896	420873	394111	609462	498928	375507
Cer(d17:1_22:0)	Cer	M+H	608.598	16.6186	C39 H78 O3 N1	2.45344e+06	23156.9	2.93096e+06	2.42988e+06	2.20568e+06	1.60189e+06	281176	5.36468e+06	1.51533e+06	1.97513e+06	1.41684e+06	1.59321e+06	1.60186e+06	1.76034e+06	1.48465e+06	1.61826e+06
Cer(d22:0_18:0)	Cer	M+H	624.629	16.1775	C40 H82 O3 N1	4.21332e+07	4.46508e+07	6.87383e+07	5.53995e+07	6.56119e+07	4.59242e+07	4.26148e+07	183176	5.62995e+07	6.68642e+07	4.55695e+07	4.00602e+07	4.19943e+07	4.83737e+07	4.20175e+07	3.93028e+07
Cer(d18:0_22:0)	Cer	M+H	624.629	17.4073	C40 H82 O3 N1	5.06373e+06	418960	6.47361e+06	5.37433e+06	3.91062e+07	3.05795e+07	4.49374e+06	4.9402e+07	5.42743e+06	7.53925e+06	5.37818e+06	5.38706e+06	9.12411e+06	1.08345e+07	9.18509e+06	9.72145e+06
Cer(d40:1)	Cer	M+H	622.613	14.8859	C40 H80 O3 N1	1.96982e+07	1.94962e+07	2.73616e+07	2.62829e+07	3.1089e+07	1.72424e+07	1.79235e+07	0	2.7282e+07	2.83268e+07	1.93357e+07	1.88413e+07	1.64369e+07	2.27207e+07	1.66339e+07	1.57105e+07
Cer(d18:1_22:0)	Cer	M+H	622.613	17.1014	C40 H80 O3 N1	2.95509e+07	558467	3.49755e+07	2.88815e+07	5.17544e+07	3.8955e+07	6.84079e+06	9.54443e+07	3.20234e+07	4.13509e+07	2.7759e+07	2.93552e+07	2.82348e+07	3.25958e+07	2.75077e+07	3.06696e+07
Cer(d18:2_22:0)	Cer	M+H	620.598	15.9511	C40 H78 O3 N1	4.85973e+06	146288	5.85056e+06	6.10752e+06	3.12742e+06	2.1554e+06	457083	4.72648e+06	3.68961e+06	3.50297e+06	2.88563e+06	2.76302e+06	2.91509e+06	3.37613e+06	2.77749e+06	2.91247e+06
Cer(d40:3)	Cer	M+H	618.582	14.723	C40 H76 O3 N1	932458	1.47794e+06	985361	855700	49598	2.519	512559	253396	646067	644581	594277	87857.3	386094	560761	460546	378412
Cer(d18:1_22:2)	Cer	M+H	618.582	16.4472	C40 H76 O3 N1	1.24482e+06	10879.9	1.11881e+06	1.2017e+06	1.30484e+07	1.12764e+07	1.44253e+06	9.08291e+06	656797	972165	579016	680514	2.17039e+06	2.56784e+06	1.98877e+06	2.13557e+06
Cer(d18:0_23:0)	Cer	M+H	638.645	17.8043	C41 H84 O3 N1	1.14696e+06	23885.6	1.18392e+06	1.26482e+06	4.65191e+06	3.14487e+06	837056	5.41355e+06	851457	906977	896083	899049	1.30685e+06	1.41568e+06	1.26887e+06	1.32261e+06
Cer(d18:0_23:1)	Cer	M+H	636.629	16.8663	C41 H82 O3 N1	2.65798e+06	13845.3	866902	2.37675e+06	8.81403e+06	6.02199e+06	1.09995e+06	7.3697e+06	1.50726e+06	2.04848e+06	1.43549e+06	1.63016e+06	2.04316e+06	2.48513e+06	2.36254e+06	1.75465e+06
Cer(d18:1_23:0)	Cer	M+H	636.629	17.5372	C41 H82 O3 N1	9.09693e+06	287318	1.28705e+07	1.01648e+07	1.29992e+07	9.84318e+06	1.92167e+06	2.30927e+07	7.04309e+06	8.8451e+06	5.85035e+06	5.81065e+06	6.71202e+06	7.93736e+06	5.83494e+06	5.62018e+06
Cer(d18:2_23:0)	Cer	M+H	634.613	16.4981	C41 H80 O3 N1	1.16111e+07	153279	1.23862e+07	9.95369e+06	5.62179e+06	4.01677e+06	738813	1.34695e+07	5.96933e+06	6.9806e+06	5.92876e+06	5.99589e+06	5.63524e+06	6.17103e+06	5.15298e+06	5.3825e+06
Cer(d18:2_23:1)	Cer	M+H	632.598	15.398	C41 H78 O3 N1	894785	14719.3	1.1722e+06	1.03968e+06	345699	166973	40478.6	370993	384496	407277	377020	301725	322822	447603	358056	319861
Cer(d41:4)	Cer	M+H	630.582	16.598	C41 H76 O3 N1	1.21977e+06	21465.7	1.3333e+06	1.26141e+06	720432	540173	86453	3.22953e+06	549516	735954	515955	577407	796637	816387	743309	772048
Cer(d18:0_24:0)	Cer	M+H	652.66	18.1589	C42 H86 O3 N1	1.11144e+07	354593	1.3955e+07	1.13208e+07	1.23131e+08	9.56394e+07	1.63158e+07	9.70223e+07	7.63092e+06	1.05761e+07	7.87911e+06	7.9502e+06	2.12873e+07	2.47688e+07	2.10337e+07	2.07319e+07
Cer(d18:0_24:1)	Cer	M+H	650.645	17.3115	C42 H84 O3 N1	3.68642e+07	681868	4.33113e+07	3.62325e+07	9.84081e+07	7.9284e+07	1.16328e+07	7.89053e+07	9.99358e+06	1.38751e+07	9.89716e+06	1.00072e+07	2.23079e+07	2.75655e+07	2.29749e+07	2.22053e+07
Cer(d18:1_24:0+O)	Cer	M+H	666.639	16.4238	C42 H84 O4 N1	2.46181e+07	326121	2.66347e+07	2.21369e+07	861180	733201	26948.2	2.34939e+06	461323	659493	550505	472564	5.50371e+06	5.76373e+06	5.6407e+06	4.76039e+06
Cer(d18:0_24:2)	Cer	M+H	648.629	16.4582	C42 H82 O3 N1	2.00258e+06	0	1.96186e+06	2.3874e+06	6.65768e+06	5.79194e+06	254.793	5.81879e+06	983242	1.39772e+06	974101	904819	1.63893e+06	1.69972e+06	2.03406e+06	1.15582e+06
Cer(d19:2_23:0+O)	Cer	M+H	664.624	16.606	C42 H82 O4 N1	1.99036e+06	11049.3	2.55955e+06	1.99517e+06	47474.1	26217.4	0	140605	5296.26	6410.36	16209.8	3270.99	425767	512529	449264	441468
Cer(d18:2_24:1)	Cer	M+H	646.613	16.0132	C42 H80 O3 N1	2.43233e+07	544497	3.70755e+07	3.53152e+07	1.31915e+07	1.20547e+07	1.50632e+06	1.71227e+07	1.55236e+07	1.67979e+07	1.46555e+07	1.28183e+07	1.47827e+07	1.71345e+07	1.55362e+07	1.36442e+07
Cer(d18:1_24:2)	Cer	M+H	646.613	16.2796	C42 H80 O3 N1	273198	4619.69	1.19636e+06	1.32138e+06	811750	532181	51124.3	2.89087e+06	1.63971e+06	2.4695e+06	940634	1.83987e+06	1.29651e+06	832262	939431	396020
Cer(d19:1_23:2)	Cer	M+H	646.613	17.409	C42 H80 O3 N1	1.89403e+06	72193	2.71158e+06	2.56616e+06	1.61612e+07	1.26388e+07	1.81891e+06	1.63677e+07	2.58004e+06	3.42297e+06	1.77232e+06	1.89559e+06	3.25818e+06	4.68184e+06	3.38598e+06	3.48238e+06
Cer(d18:1_24:3)	Cer	M+H	644.598	16.362	C42 H78 O3 N1	1.56312e+06	0	1.00243e+06	1.00313e+06	2.85187e+06	3.24237e+06	112124	4.79454e+06	97946.2	73242.8	68256.9	114753	399311	424893	243993	437415
Cer(d18:0_25:0)	Cer	M+H	666.676	18.3779	C43 H88 O3 N1	389646	1028.18	69026.3	126995	979003	638045	116780	807642	82032.2	55977.3	26671.6	57048.4	93014.6	530866	498699	506240
Cer(d18:0_25:1)	Cer	M+H	664.66	17.7114	C43 H86 O3 N1	1.84104e+06	17979.9	2.29909e+06	1.94431e+06	7.81208e+06	6.14253e+06	1.03264e+06	5.09412e+06	622310	824041	667913	645038	1.59063e+06	1.73506e+06	1.50858e+06	1.67194e+06
Cer(d18:1_25:0)	Cer	M+H	664.66	18.1485	C43 H86 O3 N1	421309	0	606374	536790	3.02386e+06	2.29269e+06	421638	4.75204e+06	912147	1.20514e+06	900760	900424	918705	1.05108e+06	817383	818602
Cer(d18:1_25:1)	Cer	M+H	662.645	17.4289	C43 H84 O3 N1	4.70712e+06	63683.9	4.93319e+06	4.97124e+06	4.15839e+06	2.75359e+06	421363	9.15828e+06	3.22338e+06	3.87316e+06	2.99064e+06	2.90692e+06	2.58334e+06	2.90807e+06	2.60436e+06	3.29164e+06
Cer(d18:2_25:1)	Cer	M+H	660.629	16.5664	C43 H82 O3 N1	1.0815e+06	0	1.4346e+06	1.12541e+06	813535	556997	84685.4	1.41298e+06	920275	921073	949702	1.02034e+06	647435	825111	565637	633757
Cer(d18:1_25:3)	Cer	M+H	658.613	16.935	C43 H80 O3 N1	1.01904e+06	8828.35	1.28011e+06	1.22857e+06	3.86429e+06	2.92372e+06	492730	2.82182e+06	431914	831578	429089	547345	1.01013e+06	1.1618e+06	851273	885653
Cer(d18:0_25:4)	Cer	M+H	658.613	17.521	C43 H80 O3 N1	4.00135e+06	109642	5.25972e+06	5.01277e+06	5.61619e+06	4.48893e+06	812280	1.27282e+07	3.17819e+06	3.83928e+06	2.4371e+06	2.47649e+06	2.8951e+06	4.07392e+06	2.91692e+06	3.03256e+06
Cer(d18:0_26:0)	Cer	M+H	680.692	18.7866	C44 H90 O3 N1	4.23591e+06	171303	5.21974e+06	4.3292e+06	6.1601e+07	4.60439e+07	8.83636e+06	2.1366e+07	1.3622e+06	1.83818e+06	1.49471e+06	1.4957e+06	8.94318e+06	9.44808e+06	9.11124e+06	8.85981e+06
Cer(d18:0_26:1)	Cer	M+H	678.676	18.0701	C44 H88 O3 N1	8.36303e+06	162671	1.16016e+07	9.73284e+06	3.30404e+07	2.56928e+07	4.44625e+06	1.74567e+07	1.36483e+06	1.83113e+06	1.33845e+06	1.06741e+06	5.91309e+06	6.97927e+06	5.33798e+06	5.06635e+06
Cer(d18:1_26:0)	Cer	M+H	678.676	18.5775	C44 H88 O3 N1	6.11086e+06	181506	7.87409e+06	6.39336e+06	1.45135e+07	1.0148e+07	2.03411e+06	1.64834e+07	5.44332e+06	7.09451e+06	5.9142e+06	5.64984e+06	5.1159e+06	5.69939e+06	5.006e+06	4.99289e+06
Cer(d20:1_24:0+O)	Cer	M+H	694.671	17.3731	C44 H88 O4 N1	3.85154e+06	41287	4.3053e+06	3.80979e+06	3.58392e+06	2.74304e+06	138468	2.32689e+06	383465	547549	317400	369430	1.45719e+06	1.86451e+06	1.45854e+06	1.41093e+06
Cer(d18:0_26:2)	Cer	M+H	676.66	17.3644	C44 H86 O3 N1	1.13496e+06	75193	1.36933e+06	648686	5.52428e+06	4.16149e+06	500810	3.58189e+06	457174	646090	476610	442755	1.00915e+06	1.16354e+06	1.00776e+06	1.07084e+06
Cer(d18:1_26:1)	Cer	M+H	676.66	17.8251	C44 H86 O3 N1	1.69143e+07	356796	1.9725e+07	1.73213e+07	1.00035e+07	7.33223e+06	1.3466e+06	1.61789e+07	9.44995e+06	1.26186e+07	8.99524e+06	1.02179e+07	9.34759e+06	1.03512e+07	9.19799e+06	9.1478e+06
Cer(d18:2_26:1)	Cer	M+H	674.645	17.0484	C44 H84 O3 N1	2.78734e+06	5943.3	3.18837e+06	2.76369e+06	2.50078e+06	1.78622e+06	344665	4.74418e+06	3.29556e+06	3.47498e+06	2.46627e+06	2.80304e+06	1.9019e+06	2.31284e+06	2.09773e+06	1.86677e+06
Cer(d18:1_26:6)	Cer	M+H	666.582	18.2711	C44 H76 O3 N1	505660	973044	3.70977e+06	649937	3.77214e+06	3.92904e+06	2.17216e+06	3.00868e+06	3.49532e+06	618677	3.66103e+06	2.55354e+06	657829	818752	626743	612299
Cer(m18:0_14:0)	Cer	M+H	496.509	12.9262	C32 H66 O2 N1	1.98724e+06	29085.5	2.01581e+06	1.9456e+06	3.27151e+06	2.0832e+06	641689	1.56888e+06	17254.5	22546.4	99172.8	86472.9	1.06155e+06	861879	1.29715e+06	988402
Cer(m18:1_14:0)	Cer	M+H	494.493	11.5371	C32 H64 O2 N1	131803	0	184659	207891	2.11813e+06	1.59937e+06	483524	614123	261602	208115	457992	369478	739479	482706	512713	449915
Cer(m17:0_16:0)	Cer	M+H	510.524	14.1984	C33 H68 O2 N1	1.35637e+06	8275.94	1.28811e+06	1.3243e+06	2.35125e+06	1.89771e+06	607438	1.42191e+06	28316.2	13664.7	9755.9	40766.3	593823	749802	644282	686637
Cer(m33:1)	Cer	M+H	508.509	13.763	C33 H66 O2 N1	277293	3686.12	527270	446609	2.21562e+06	1.59177e+06	416866	1.05928e+06	365582	306414	299080	421495	728541	708421	236433	741091
Cer(m18:0_16:0)	Cer	M+H	524.54	14.345	C34 H70 O2 N1	5.09157e+07	807008	5.58905e+07	5.37461e+07	1.05574e+08	7.51508e+07	1.70555e+07	3.76783e+07	4.33374e+06	4.56741e+06	3.90922e+06	4.06812e+06	1.33725e+07	3.10942e+07	2.34932e+07	2.62226e+07
Cer(m18:1_16:0)	Cer	M+H	522.524	13.0171	C34 H68 O2 N1	2.14207e+06	45847	2.30177e+06	2.77669e+06	1.48735e+07	1.07392e+07	3.04061e+06	5.51643e+06	2.01524e+06	1.90568e+06	2.07504e+06	2.05627e+06	4.18469e+06	3.24879e+06	3.76317e+06	3.55366e+06
Cer(m34:1)	Cer	M+H	522.524	13.861	C34 H68 O2 N1	303798	5275.46	448998	447116	4.91908e+06	3.77716e+06	1.01806e+06	2.52681e+06	267792	351784	250440	252612	1.04101e+06	1.05366e+06	1.17483e+06	1.00741e+06
Cer(m18:0_18:0)	Cer	M+H	552.571	15.6678	C36 H74 O2 N1	6.05168e+06	99649.5	8.79401e+06	7.68777e+06	6.43159e+07	4.77519e+07	7.27324e+06	2.2929e+07	2.96456e+06	3.64564e+06	2.5144e+06	2.498e+06	9.06654e+06	1.18996e+07	1.13853e+07	1.10189e+07
Cer(m18:1_18:0)	Cer	M+H	550.556	14.4289	C36 H72 O2 N1	2.27994e+06	16599	2.23404e+06	1.95129e+06	4.73497e+07	3.43477e+07	7.31035e+06	1.60016e+07	7.64449e+06	7.69665e+06	7.18577e+06	6.41499e+06	9.33802e+06	1.07563e+07	6.74821e+06	9.13902e+06
Cer(m18:0_20:0)	Cer	M+H	580.603	16.8235	C38 H78 O2 N1	5.50183e+06	91430.3	7.00235e+06	6.02738e+06	5.31009e+07	4.29369e+07	7.22536e+06	1.87476e+07	2.45949e+06	2.95104e+06	2.25653e+06	2.43239e+06	8.64664e+06	1.02279e+07	7.97872e+06	8.3688e+06
Cer(m18:1_20:0)	Cer	M+H	578.587	15.7251	C38 H76 O2 N1	1.98121e+06	45414.6	3.09154e+06	2.84662e+06	9.54783e+07	6.99182e+07	1.03679e+07	2.70759e+07	1.43375e+07	1.53928e+07	1.20464e+07	1.19883e+07	1.4752e+07	1.8635e+07	1.61767e+07	1.68845e+07
Cer(m18:1_21:0)	Cer	M+H	592.603	16.3462	C39 H78 O2 N1	11849.7	6331.59	28171	27329.2	3.22533e+06	2.45695e+06	7242.4	1.67912e+06	46121.7	86796.5	37683	90649.9	462056	177126	463953	53484.9
Cer(m18:0_22:0)	Cer	M+H	608.634	17.6929	C40 H82 O2 N1	1.31613e+07	298431	1.8499e+07	1.48459e+07	8.11046e+07	5.76694e+07	1.13383e+07	2.50753e+07	3.71856e+06	4.44846e+06	3.43068e+06	3.42078e+06	1.26397e+07	1.63744e+07	1.26942e+07	1.3205e+07
Cer(m18:1_22:0)	Cer	M+H	606.618	16.8506	C40 H80 O2 N1	5.32448e+06	170532	1.33026e+07	1.07029e+07	1.71346e+08	1.3638e+08	2.3848e+07	5.81451e+07	2.68576e+07	2.97588e+07	2.36764e+07	2.49707e+07	3.13663e+07	3.89105e+07	2.79187e+07	2.93526e+07
Cer(m40:1+O)	Cer	M+H	622.613	14.665	C40 H80 O3 N1	387849	1.65461e+06	552585	356278	283587	42604.8	981688	0	1.07651e+06	798632	715830	573376	370515	542954	408145	360130
Cer(m18:1_22:1)	Cer	M+H	604.603	15.6601	C40 H78 O2 N1	614410	0	906357	789548	2.79209e+06	2.00774e+06	340887	908234	867349	889924	742470	701937	636803	896465	859639	774726
Cer(m18:0_23:0)	Cer	M+H	622.65	18.0673	C41 H84 O2 N1	3.11613e+06	16945.1	4.75703e+06	3.9799e+06	8.40467e+06	7.06881e+06	1.1611e+06	3.60947e+06	441580	519819	382886	364393	1.84664e+06	2.22168e+06	1.57862e+06	1.51617e+06
Cer(m17:0_24:0)	Cer	M+H	622.65	18.3403	C41 H84 O2 N1	291669	49832.5	407280	356605	2.60889e+06	1.97024e+06	324883	1.33597e+06	134116	145047	95122.9	100253	499965	539248	397712	410101
Cer(m18:1_23:0)	Cer	M+H	620.634	17.3034	C41 H82 O2 N1	2.21005e+06	43211.6	2.63121e+06	2.37032e+06	2.53439e+07	1.93689e+07	2.3669e+06	6.41327e+06	2.74709e+06	2.91379e+06	2.57667e+06	2.42434e+06	3.36772e+06	4.34414e+06	3.37263e+06	3.48893e+06
Cer(m17:1_24:0)	Cer	M+H	620.634	18.12	C41 H82 O2 N1	264675	0	424392	338796	1.94716e+06	1.52808e+06	260586	863418	151547	187558	132984	130299	316647	398221	306770	313521
Cer(m18:1_23:1)	Cer	M+H	618.618	16.2514	C41 H80 O2 N1	579096	0	1.0797e+06	711676	2.32662e+06	2.03323e+06	164952	1.18609e+06	703737	854396	668119	834325	535044	857700	1.05481e+06	580412
Cer(m18:0_24:0)	Cer	M+H	636.665	18.4008	C42 H86 O2 N1	3.02655e+07	722054	4.19224e+07	3.30689e+07	1.66161e+08	1.19158e+08	2.15353e+07	6.13075e+07	4.37909e+06	5.25042e+06	4.212e+06	4.23171e+06	2.8223e+07	3.30124e+07	2.6758e+07	2.73195e+07
Cer(m18:0_24:1)	Cer	M+H	634.65	17.6924	C42 H84 O2 N1	1.01065e+08	2.58144e+06	1.44234e+08	1.1477e+08	4.44672e+08	3.46166e+08	4.44031e+07	1.16676e+08	3.90103e+07	4.25498e+07	3.54061e+07	3.30318e+07	8.12841e+07	7.9512e+07	7.87438e+07	8.14448e+07
Cer(m18:1_24:1)	Cer	M+H	632.634	16.7632	C42 H82 O2 N1	4.11991e+07	819819	5.5184e+07	4.6063e+07	8.63771e+07	6.71293e+07	1.14451e+07	3.33643e+07	2.36948e+07	2.55177e+07	2.18405e+07	2.29426e+07	2.79083e+07	3.18092e+07	2.61854e+07	2.76459e+07
Cer(m18:1_24:2)	Cer	M+H	630.618	15.822	C42 H80 O2 N1	275394	0.758	780608	926201	4.96503e+06	3.8986e+06	830571	4.4274e+06	5.38465e+06	8.17853e+06	4.2306e+06	3.9129e+06	2.28047e+06	2.86573e+06	1.95708e+06	2.52265e+06
Cer(m18:0_25:0)	Cer	M+H	650.681	18.5983	C43 H88 O2 N1	147316	0	194220	167128	1.57958e+06	1.16838e+06	185682	614645	47223.9	73678.3	56911.3	55577.1	221382	293988	206431	221288
Cer(m18:0_25:1)	Cer	M+H	648.665	17.9972	C43 H86 O2 N1	780666	3846.58	1.23122e+06	1.17907e+06	5.66156e+06	4.86557e+06	709583	1.90631e+06	593010	478157	364068	426993	996353	1.28923e+06	978262	761360
Cer(m18:1_25:1)	Cer	M+H	646.65	17.2151	C43 H84 O2 N1	1.07286e+06	1356.33	1.39894e+06	1.10595e+06	5.3154e+06	3.85252e+06	586385	2.00674e+06	1.29407e+06	1.4367e+06	1.1623e+06	1.07098e+06	1.25597e+06	1.42259e+06	1.23064e+06	1.22445e+06
Cer(m18:0_26:0)	Cer	M+H	664.697	18.9859	C44 H90 O2 N1	2.83409e+06	43646.1	3.36385e+06	2.58481e+06	6.12236e+06	4.49435e+06	902324	2.37223e+06	247636	304843	259022	291523	1.55615e+06	1.64039e+06	1.48753e+06	1.45845e+06
Cer(m18:0_26:1)	Cer	M+H	662.681	18.3881	C44 H88 O2 N1	6.40408e+06	127034	8.64662e+06	7.19358e+06	1.49588e+07	9.81039e+06	1.85102e+06	5.80186e+06	1.34759e+06	1.45299e+06	1.18328e+06	1.25111e+06	3.43053e+06	4.37794e+06	3.54298e+06	3.55836e+06
Cer(m18:1_26:1)	Cer	M+H	660.665	17.62	C44 H86 O2 N1	2.52102e+06	2785.62	3.40755e+06	2.49049e+06	1.18959e+07	8.16352e+06	1.44896e+06	4.00318e+06	2.7536e+06	2.89041e+06	2.31818e+06	2.4573e+06	2.81126e+06	3.16652e+06	2.26419e+06	2.31483e+06
Cer(m20:1_26:0+O)	Cer	M+H	706.707	18.6961	C46 H92 O3 N1	590486	1901.85	846694	667811	873371	735909	143707	494706	2827.54	10764.9	4729.26	7495.85	281449	312102	254184	244586
Cer(t28:1)	Cer	M+H	470.42	8.69067	C28 H56 O4 N1	2.69305e+06	373895	2.416e+06	2.02493e+06	2.4883e+06	2.47123e+06	1.23271e+06	3.65286e+06	3.61825e+06	1.97136e+06	3.55946e+06	3.20873e+06	2.82171e+06	1.6953e+06	2.73278e+06	2.66504e+06
Cer(t16:0_16:0)	Cer	M+H	528.499	8.18812	C32 H66 O4 N1	7.25249e+06	6.11794e+06	5.76435e+06	4.59199e+06	6.74079e+06	3.73184e+06	6.61615e+06	493237	6.32807e+06	6.94008e+06	7.80864e+06	7.33571e+06	6.48975e+06	4.94056e+06	6.25498e+06	6.50285e+06
Cer(t32:1)	Cer	M+H	526.483	11.6747	C32 H64 O4 N1	619974	40470.6	553980	593128	633783	695263	158473	851859	715152	452533	700539	735786	619349	470012	592228	552087
Cer(t34:0)	Cer	M+H	556.53	9.65351	C34 H70 O4 N1	4.94286e+07	3.94591e+07	4.27086e+07	3.24564e+07	4.74131e+07	2.63022e+07	4.50388e+07	155724	4.12751e+07	4.93434e+07	4.87458e+07	4.9281e+07	4.26641e+07	2.90792e+07	4.13134e+07	4.10887e+07
Cer(t18:0_16:0)	Cer	M+H	556.53	11.6603	C34 H70 O4 N1	4.22627e+06	266964	3.1285e+06	3.22988e+06	370477	1.21442e+06	1.00223e+06	1.11233e+06	1.36582e+06	1.70512e+06	116214	1.53337e+06	1.99191e+06	1.55693e+06	1.89321e+06	965346
Cer(t16:1_18:1)	Cer	M+H	552.499	11.7538	C34 H66 O4 N1	727777	14517.5	635013	741957	907018	968923	181098	1.05136e+06	990382	586568	813901	818520	701435	525781	656007	698493
Cer(t34:3)	Cer	M+H	550.483	8.22184	C34 H64 O4 N1	690515	853503	866055	825803	1.20948e+06	715262	492313	0	1.21943e+06	1.29801e+06	632122	575310	511506	618320	506490	545018
Cer(t34:4)	Cer	M+H	548.467	11.6809	C34 H62 O4 N1	570384	29525.6	419917	600511	633121	697064	199329	579094	750490	402484	693097	712454	700693	481592	671201	675188
Cer(t36:0)	Cer	M+H	584.561	11.2427	C36 H74 O4 N1	4.03542e+07	5.3426e+07	4.37718e+07	3.24842e+07	4.5664e+07	2.88623e+07	5.12484e+07	10859	4.9345e+07	5.09222e+07	5.00452e+07	5.3516e+07	4.13939e+07	3.71462e+07	3.94674e+07	4.02674e+07
Cer(t36:5)	Cer	M+H	574.483	11.7524	C36 H64 O4 N1	781131	6585.43	677249	759156	909682	966621	224383	914111	1.01216e+06	579209	939028	911826	935403	581698	771156	860617
Cer(t38:0)	Cer	M+H	612.593	12.805	C38 H78 O4 N1	8.81193e+06	1.52895e+07	1.2226e+07	1.13121e+07	1.15111e+07	6.69238e+06	1.35529e+07	0	1.07367e+07	1.06273e+07	1.09743e+07	1.02456e+07	1.05008e+07	8.11442e+06	1.17121e+07	1.16229e+07
Cer(t38:3)	Cer	M+H	606.546	11.218	C38 H72 O4 N1	1.7548e+06	520013	5.22021e+06	1.16602e+06	3.86945e+06	3.58299e+06	1.49971e+06	0	3.93916e+06	4.13687e+06	1.4267e+06	1.50442e+06	1.32158e+06	4.46576e+06	1.90407e+06	1.31473e+06
Cer(t18:0_22:0)	Cer	M+H	640.624	15.714	C40 H82 O4 N1	912452	19004.3	815214	786831	8803.35	7945.62	5971.16	12654	52292.7	67982.6	17304	23927.1	87792.9	96789.6	53489.9	73411.1
Cer(t18:0_24:0)	Cer	M+H	668.655	17.477	C42 H86 O4 N1	5.08398e+06	182241	6.22578e+06	5.19342e+06	2.04031e+06	1.63318e+06	254849	3.28178e+06	422221	612750	417098	425769	1.4774e+06	1.71348e+06	1.47165e+06	1.58172e+06
Cer(t20:0_24:0)	Cer	M+H	696.686	17.6515	C44 H90 O4 N1	788921	0	696481	744479	0	3725.83	0	55849	13077.5	15497.1	12537.3	19692.5	91862.6	95053.1	86156.1	117528
CerPE(d31:0)	CerPE	M+H	621.497	1.2484	C33 H70 O6 N2 P1	651586	430990	714838	430931	555217	328958	737942	0	693497	749865	412496	255884	625786	523422	496388	635469
CerPE(d18:2_19:1)	CerPE	M+H	699.544	10.9731	C39 H76 O6 N2 P1	1.4176e+06	5796.8	909562	999371	1.60427e+06	1.40895e+06	402513	3.08469e+06	1.09162e+06	1.67544e+06	1.40971e+06	1.32896e+06	1.16414e+06	941669	1.03824e+06	1.02526e+06
ChE(16:0)	ChE	M+NH4	642.618	20.4559	C43 H80 O2 N1	133035	94033.3	141711	148009	5.58853e+06	4.95752e+06	1.19969e+06	1.43276e+06	393096	319422	383265	284934	983734	945763	843226	792042
ChE(16:1)	ChE	M+NH4	640.603	19.9205	C43 H78 O2 N1	327166	141280	218327	200108	2.22437e+06	2.0537e+06	674864	791298	294344	418429	205311	931379	649672	1.44499e+06	815839	340737
ChE(18:0)	ChE	M+NH4	670.65	20.8769	C45 H84 O2 N1	20597.6	21797.8	9803.15	138029	3.91832e+06	3.46264e+06	687521	1.05299e+06	39729.2	100211	49730.2	85319	494837	379487	428891	316134
ChE(18:1)	ChE	M+NH4	668.634	20.422	C45 H82 O2 N1	1.04842e+06	1613.15	1.2586e+06	825174	2.83574e+07	2.7188e+07	5.8273e+06	1.21942e+07	5.04368e+06	5.72046e+06	4.27603e+06	5.47873e+06	5.99247e+06	6.79124e+06	5.95947e+06	5.31062e+06
ChE(18:2)	ChE	M+NH4	666.618	19.9608	C45 H80 O2 N1	87760.9	0	74563.1	71035.9	2.85232e+06	2.45885e+06	461663	1.78266e+06	847779	834561	450590	767965	732469	764498	537235	492923
ChE(20:1)	ChE	M+NH4	696.665	20.8527	C47 H86 O2 N1	27293.5	2575.51	20998.7	14929.4	5.3129e+06	4.32363e+06	954321	2.71747e+06	773095	770547	726632	892414	1.05394e+06	1.05084e+06	868618	819227
ChE(20:2)	ChE	M+NH4	694.65	20.4477	C47 H84 O2 N1	0	0	0	0	5.2391e+06	4.18792e+06	935025	3.64127e+06	2.00388e+06	2.33141e+06	2.26574e+06	2.58171e+06	1.89765e+06	2.01962e+06	1.74674e+06	1.66416e+06
ChE(20:3)	ChE	M+NH4	692.634	19.9232	C47 H82 O2 N1	0	0	0	0	5.3091e+06	5.27943e+06	972309	3.07156e+06	122035	165074	922342	1.05442e+06	660847	1.21868e+06	846663	767937
ChE(20:4)	ChE	M+NH4	690.618	19.688	C47 H80 O2 N1	128354	0	176608	107440	1.40475e+06	1.20735e+06	222277	2.13463e+06	1.20363e+06	1.17774e+06	1.43768e+06	1.39369e+06	717096	857850	611657	645131
ChE(22:3)	ChE	M+NH4	720.665	20.4792	C49 H86 O2 N1	0	0	32537.8	0	3.38605e+06	2.87246e+06	574317	3.4309e+06	3.1109e+06	2.56159e+06	2.17015e+06	2.72927e+06	1.506e+06	1.7645e+06	1.4895e+06	1.53545e+06
ChE(22:4)	ChE	M+NH4	718.65	20.1001	C49 H84 O2 N1	0	0	0	0	2.45056e+06	2.18627e+06	409557	3.23695e+06	3.48695e+06	3.50864e+06	3.01468e+06	2.89499e+06	1.5183e+06	1.606e+06	1.31144e+06	1.38336e+06
ChE(22:5)	ChE	M+NH4	716.634	19.6807	C49 H82 O2 N1	14839.8	3436.7	24741.4	30570.2	3.1653e+06	2.52912e+06	509306	4.07409e+06	3.3219e+06	3.1645e+06	2.88629e+06	2.99763e+06	1.5417e+06	1.80588e+06	1.3974e+06	1.36112e+06
ChE(22:6)	ChE	M+NH4	714.618	19.412	C49 H80 O2 N1	451081	19226.3	560889	462553	5.5675e+07	4.25462e+07	7.82234e+06	6.64692e+07	2.91005e+07	3.46256e+07	2.88542e+07	3.12251e+07	1.93088e+07	2.06759e+07	1.88904e+07	1.65435e+07
ChE(24:0)	ChE	M+NH4	754.744	21.8704	C51 H96 O2 N1	0	0	0	0	1.55033e+06	838748	442380	769450	68487	103424	67765.3	81541.5	193489	188579	164439	182614
ChE(24:1)	ChE	M+NH4	752.728	21.5162	C51 H94 O2 N1	55955.9	0	37168.6	50295.9	8.93102e+06	8.62705e+06	1.32133e+06	4.82388e+06	915888	1.03158e+06	1.08998e+06	1.20749e+06	1.24173e+06	1.56862e+06	1.37192e+06	1.40252e+06
ChE(24:2)	ChE	M+NH4	750.712	21.2022	C51 H92 O2 N1	0	0	0	0	2.33827e+06	2.12056e+06	280137	1.48181e+06	423788	596209	450034	564771	380190	563430	444369	308358
ChE(24:3)	ChE	M+NH4	748.697	20.8782	C51 H90 O2 N1	0	0	0	0	4.05173e+06	3.35054e+06	734784	5.11496e+06	1.63048e+06	1.73123e+06	1.97044e+06	1.97621e+06	1.50132e+06	1.95368e+06	1.539e+06	1.24922e+06
ChE(24:4)	ChE	M+NH4	746.681	20.5076	C51 H88 O2 N1	598645	3637.56	765433	541911	1.59628e+07	1.37165e+07	2.89944e+06	1.87539e+07	1.57322e+07	1.59665e+07	1.44911e+07	1.698e+07	9.93237e+06	1.0799e+07	9.03858e+06	7.78164e+06
ChE(24:5)	ChE	M+NH4	744.665	20.1459	C51 H86 O2 N1	1.75872e+06	319568	2.65262e+06	2.21355e+06	3.35919e+07	2.94443e+07	6.33968e+06	4.12926e+07	2.78247e+07	2.8605e+07	2.32671e+07	2.67015e+07	1.60725e+07	1.76147e+07	1.39699e+07	1.35752e+07
ChE(24:6)	ChE	M+NH4	742.65	19.7803	C51 H84 O2 N1	520769	868195	563212	475636	1.63895e+07	1.32316e+07	2.74601e+06	1.63963e+07	6.18094e+06	6.88588e+06	5.66754e+06	6.78786e+06	4.34575e+06	9.23963e+06	4.25059e+06	4.22104e+06
ChE(26:0)	ChE	M+NH4	782.775	22.1387	C53 H100 O2 N1	0	0	0	0.001	1.13847e+06	605238	561499	1.03842e+06	127978	132275	130632	145892	175923	181520	137683	239987
ChE(26:1)	ChE	M+NH4	780.759	21.8076	C53 H98 O2 N1	121412	0	128815	82834.7	1.5887e+07	1.16047e+07	2.25845e+06	8.57091e+06	1.11388e+06	1.42498e+06	1.36403e+06	1.46417e+06	2.27393e+06	2.25505e+06	2.18369e+06	2.28029e+06
ChE(26:2)	ChE	M+NH4	778.744	21.5038	C53 H96 O2 N1	0	0	0	15663.7	6.52144e+06	5.15129e+06	876106	5.73256e+06	1.34356e+06	1.22814e+06	1.4199e+06	1.46728e+06	1.32954e+06	1.45617e+06	1.26428e+06	1.19906e+06
ChE(26:3)	ChE	M+NH4	776.728	21.2133	C53 H94 O2 N1	0	0	0	0	3.06263e+06	2.66956e+06	415067	3.36864e+06	1.04726e+06	1.17858e+06	1.12822e+06	1.3082e+06	754547	989191	494541	895913
ChE(26:4)	ChE	M+NH4	774.712	20.8845	C53 H92 O2 N1	403208	0	526868	329070	1.03325e+07	7.3413e+06	1.69049e+06	1.32603e+07	6.9193e+06	6.76341e+06	6.81937e+06	7.52002e+06	4.77201e+06	5.70635e+06	5.01738e+06	4.14436e+06
ChE(26:5)	ChE	M+NH4	772.697	20.5567	C53 H90 O2 N1	849520	14570.2	1.15914e+06	955590	1.34266e+07	1.17027e+07	2.57933e+06	1.37603e+07	7.12567e+06	7.69376e+06	6.56154e+06	6.81304e+06	5.06693e+06	5.96246e+06	5.16548e+06	3.96553e+06
ChE(26:6)	ChE	M+NH4	770.681	20.1864	C53 H88 O2 N1	16483.8	781.415	0	0	2.16372e+07	1.92291e+07	4.94396e+06	2.01189e+07	6.73494e+06	6.77841e+06	5.45226e+06	5.76521e+06	5.73642e+06	6.2009e+06	5.04513e+06	4.43818e+06
ChE(28:1)	ChE	M+NH4	808.791	22.0687	C55 H102 O2 N1	0	0	0	0	2.20182e+06	1.60547e+06	285736	1.16333e+06	74549.4	131642	113645	139829	301055	247853	246735	225443
ChE(28:2)	ChE	M+NH4	806.775	21.7973	C55 H100 O2 N1	0	0	0	0	1.56527e+06	1.1287e+06	203477	1.34924e+06	162526	184088	181068	223016	246420	258464	251994	232363
ChE(28:4)	ChE	M+NH4	802.744	21.224	C55 H96 O2 N1	128184	0	104390	86224.2	1.53898e+06	1.19445e+06	191006	1.78047e+06	668906	971798	616530	794572	646389	726452	627674	564064
ChE(28:5)	ChE	M+NH4	800.728	20.9115	C55 H94 O2 N1	436892	1566.55	443654	294135	8.38905e+06	7.17652e+06	1.69199e+06	7.77849e+06	3.52493e+06	3.34769e+06	3.15048e+06	2.90823e+06	2.84486e+06	3.56743e+06	2.63787e+06	2.6495e+06
ChE(28:6)	ChE	M+NH4	798.712	20.5889	C55 H92 O2 N1	42573.4	9095.55	122281	128762	1.81564e+07	1.13577e+07	3.14551e+06	1.07708e+07	3.03423e+06	2.98757e+06	2.47093e+06	2.13454e+06	4.93095e+06	5.69945e+06	4.95561e+06	3.09526e+06
ChE(30:4)	ChE	M+NH4	830.775	21.525	C57 H100 O2 N1	32977.5	0	8378.14	0	1.66017e+06	1.30114e+06	225769	1.7197e+06	692095	762596	681870	985921	469418	570802	542339	545403
ChE(30:5)	ChE	M+NH4	828.759	21.2437	C57 H98 O2 N1	93628.2	0	65822.2	19433.4	1.20381e+07	9.97936e+06	1.85146e+06	1.07937e+07	3.78888e+06	4.20781e+06	3.82094e+06	4.07305e+06	3.09014e+06	3.70984e+06	3.2059e+06	3.3054e+06
ChE(30:6)	ChE	M+NH4	826.744	20.9506	C57 H96 O2 N1	328045	0	474864	395879	3.0124e+07	2.6698e+07	6.81519e+06	2.19145e+07	5.84205e+06	6.38655e+06	6.10095e+06	5.23516e+06	8.17818e+06	8.48481e+06	6.88035e+06	7.1561e+06
ChE(32:4)	ChE	M+NH4	858.806	21.7972	C59 H104 O2 N1	3477.97	0	3496.53	0	2.03479e+06	1.9766e+06	307436	1.90517e+06	328687	394226	375801	386410	295254	480438	420535	457463
ChE(32:5)	ChE	M+NH4	856.791	21.5392	C59 H102 O2 N1	32242.7	0	39223.6	24896.3	1.64106e+07	1.38981e+07	2.91523e+06	1.42659e+07	3.25173e+06	3.48872e+06	3.36052e+06	3.66534e+06	3.64769e+06	4.16375e+06	3.64488e+06	3.45406e+06
ChE(32:6)	ChE	M+NH4	854.775	21.2764	C59 H100 O2 N1	229344	9429.01	150997	104645	7.4819e+07	6.23374e+07	1.31452e+07	4.8738e+07	9.74596e+06	1.43962e+07	9.45992e+06	1.07206e+07	1.53331e+07	1.66375e+07	1.49256e+07	1.35914e+07
ChE(34:5)	ChE	M+NH4	884.822	21.8136	C61 H106 O2 N1	0	0	0	0	5.10074e+06	4.74863e+06	1.17347e+06	3.89015e+06	515921	562860	547081	519631	876555	950461	814703	834817
ChE(34:6)	ChE	M+NH4	882.806	21.5678	C61 H104 O2 N1	2802.02	12764.5	69997.1	16818.9	3.30411e+07	2.46399e+07	5.2874e+06	1.78398e+07	4.07208e+06	3.80196e+06	3.45219e+06	3.62931e+06	6.15202e+06	5.98426e+06	5.16584e+06	5.04243e+06
ChE(36:6)	ChE	M+NH4	910.837	21.8285	C63 H108 O2 N1	30568.1	91236.9	11170.5	42971.4	2.82974e+06	1.34743e+06	287880	980592	1.51561e+06	384144	230909	189717	401753	394183	315869	384569
Co(Q10)	Co	M+NH4	880.718	18.7103	C59 H94 O4 N1	2.30436e+08	4.44399e+06	3.01506e+08	2.48466e+08	1.3839e+08	1.0813e+08	1.89504e+07	7.6737e+07	6.44036e+07	6.41837e+07	6.51189e+07	6.8506e+07	9.75222e+07	1.01674e+08	9.06467e+07	8.99159e+07
Co(Q9)	Co	M+NH4	812.655	17.7388	C54 H86 O4 N1	719503	35583.3	1.03046e+06	874243	9.98108e+06	7.47877e+06	1.18736e+06	5.26461e+06	3.29202e+06	2.99197e+06	2.77412e+06	2.73478e+06	2.36902e+06	3.07675e+06	2.32459e+06	2.31148e+06
DG(16:0_16:1)	DG	M+NH4	584.525	14.3115	C35 H70 O5 N1	3.84016e+06	233565	4.49431e+06	3.41588e+06	3.22591e+06	2.79563e+06	529966	2.5865e+06	2.29764e+06	993920	1.13222e+06	1.21065e+06	2.47032e+06	2.9631e+06	2.42025e+06	2.12566e+06
DG(32:1e)	DG	M+Na	575.501	19.875	C35 H68 O4 Na1	1.0133e+07	2.16535e+06	1.08085e+07	9.05117e+06	1.45529e+07	1.29213e+07	2.86314e+06	8.62028e+06	9.53946e+06	1.01963e+07	1.05164e+07	1.12093e+07	9.31158e+06	8.70338e+06	8.07832e+06	7.34899e+06
DG(16:0_17:0)	DG	M+NH4	600.556	9.5143	C36 H74 O5 N1	1.17224e+06	1.04771e+06	1.10714e+06	761287	1.21597e+06	626082	1.14141e+06	0	1.06819e+06	1.25129e+06	1.40889e+06	1.38976e+06	1.00112e+06	678777	965760	975114
DG(18:0_16:0)	DG	M+NH4	614.572	16.6486	C37 H76 O5 N1	2.04669e+07	1.44809e+07	1.82164e+07	2.28867e+07	1.79487e+07	1.09865e+07	1.19105e+07	9.66785e+06	2.75789e+07	3.33937e+07	2.6953e+07	2.48099e+07	2.15753e+07	2.24968e+07	2.0798e+07	2.12713e+07
DG(34:1e)	DG	M+Na	603.532	20.227	C37 H72 O4 Na1	2.05532e+07	4.04569e+06	2.43883e+07	2.10261e+07	2.46297e+07	2.36354e+07	7.13242e+06	1.98619e+07	1.89947e+07	2.00774e+07	1.70125e+07	1.897e+07	1.66922e+07	1.6916e+07	1.6041e+07	1.44021e+07
DG(16:1_18:1)	DG	M+NH4	610.541	14.3424	C37 H72 O5 N1	8.14114e+06	185925	8.25897e+06	8.01398e+06	5.14951e+06	3.80891e+06	1.18678e+06	4.58229e+06	3.60587e+06	3.43168e+06	1.71021e+06	3.05175e+06	4.04189e+06	4.36444e+06	3.42999e+06	3.70766e+06
DG(16:0_18:3)	DG	M+H	591.498	15.458	C37 H67 O5	3.2479e+07	1.55238e+07	2.90708e+07	3.05869e+07	7.46291e+07	5.21484e+07	1.47334e+07	810984	2.97385e+07	2.70627e+07	3.87574e+07	1.74237e+07	3.27576e+07	1.97156e+07	1.8297e+07	1.20457e+07
DG(18:0_18:0)	DG	M+NH4	642.603	17.5572	C39 H80 O5 N1	1.91303e+07	1.22864e+07	2.89167e+07	2.15093e+07	3.15491e+07	2.2173e+07	1.79946e+07	1.79228e+06	2.71369e+07	3.17599e+07	2.03944e+07	1.87498e+07	1.74095e+07	1.99924e+07	1.3706e+07	1.31675e+07
DG(18:0_18:1)	DG	M+Na	645.543	16.7412	C39 H74 O5 Na1	1.88926e+07	1.48687e+06	2.39141e+07	2.47909e+07	5.21942e+07	4.26922e+07	8.48724e+06	5.08375e+07	3.07372e+07	2.97458e+07	2.47755e+07	2.34642e+07	2.24692e+07	2.61969e+07	2.15488e+07	2.24714e+07
DG(18:1_18:1)	DG	M+Na	643.527	15.6138	C39 H72 O5 Na1	4.16421e+07	1.01198e+06	5.53843e+07	6.7023e+07	5.84674e+07	4.24331e+07	9.23288e+06	4.15232e+07	4.27832e+07	4.34635e+07	2.98945e+07	2.57053e+07	2.8956e+07	3.70814e+07	3.75185e+07	3.22035e+07
DG(18:1_18:2)	DG	M+NH4	636.556	14.5473	C39 H74 O5 N1	1.4113e+06	237465	2.39417e+06	2.837e+06	7.82964e+06	5.11037e+06	1.30704e+06	8.50648e+06	8.18659e+06	8.01786e+06	7.65959e+06	6.7849e+06	4.73416e+06	4.81844e+06	4.55586e+06	2.26145e+06
DG(16:0_20:3)	DG	M+NH4	636.556	14.8194	C39 H74 O5 N1	1.32517e+06	5317.36	1.65946e+06	1.7186e+06	3.6227e+06	2.24093e+06	420244	3.64551e+06	2.73468e+06	2.44099e+06	2.32376e+06	1.96952e+06	621375	1.93622e+06	1.64324e+06	1.56298e+06
DG(36:3e)	DG	M+H	605.55	20.618	C39 H73 O4	9.43813e+06	1.18658e+06	1.05387e+07	8.34405e+06	2.47715e+07	2.4221e+07	6.40565e+06	2.18952e+07	1.70518e+07	1.82524e+07	1.78261e+07	1.87519e+07	1.23696e+07	1.6031e+07	1.41514e+07	1.19867e+07
DG(16:0_20:4)	DG	M+NH4	634.541	14.2189	C39 H72 O5 N1	5.22527e+06	11490.6	4.19679e+06	4.58837e+06	4.07834e+06	2.29074e+06	573310	7.36791e+06	2.87223e+06	3.11756e+06	3.02019e+06	2.53083e+06	2.68007e+06	3.18241e+06	3.07883e+06	2.04472e+06
DG(36:4e)	DG	M+H	603.535	19.841	C39 H71 O4	5.94766e+06	946304	6.38813e+06	5.67673e+06	5.24101e+06	3.90652e+06	1.08019e+06	4.74188e+06	4.56179e+06	5.3831e+06	5.01879e+06	6.07819e+06	4.3588e+06	4.42605e+06	3.88047e+06	4.0502e+06
DG(16:0_20:5)	DG	M+H	615.498	14.498	C39 H67 O5	8.69724e+06	270429	2.06949e+07	2.99664e+07	9.71938e+06	6.07125e+06	2.5692e+06	5.42237e+06	1.30131e+07	1.07322e+07	1.10191e+07	8.59733e+06	5.0559e+06	6.14713e+06	5.48173e+06	5.14717e+06
DG(19:1_18:1)	DG	M+Na	657.543	16.1603	C40 H74 O5 Na1	868061	0	1.61473e+06	1.80077e+06	3.51889e+06	2.41792e+06	187975	3.26599e+06	2.37035e+06	2.0639e+06	1.93399e+06	1.39831e+06	1.52811e+06	1.80816e+06	1.81202e+06	1.42285e+06
DG(18:0_20:1)	DG	M+NH4	668.619	17.563	C41 H82 O5 N1	886278	4863.48	1.51951e+06	970995	4.64982e+06	3.38207e+06	619072	3.01222e+06	1.67421e+06	1.60783e+06	45645.3	1.05393e+06	1.3009e+06	1.52367e+06	1.06384e+06	1.08592e+06
DG(20:1_18:1)	DG	M+NH4	666.603	16.6928	C41 H80 O5 N1	7.25486e+06	92270.4	9.25775e+06	8.42693e+06	9.05592e+06	1.04681e+07	880031	8.58659e+06	5.26556e+06	7.16965e+06	4.24864e+06	3.96804e+06	6.13599e+06	5.00756e+06	4.55719e+06	4.87192e+06
DG(18:1_20:2)	DG	M+NH4	664.587	15.7289	C41 H78 O5 N1	737927	6979.59	1.11874e+06	1.20536e+06	3.21821e+06	2.64418e+06	315055	3.61385e+06	2.87773e+06	3.3892e+06	1.81147e+06	1.81996e+06	924165	2.12963e+06	1.32205e+06	1.57458e+06
DG(18:0_20:3)	DG	M+NH4	664.587	16.0732	C41 H78 O5 N1	580667	1162.92	1.7696e+06	1.9012e+06	5.33462e+06	4.64323e+06	439586	7.40416e+06	3.2223e+06	3.41976e+06	3.07266e+06	1.48298e+06	2.19488e+06	2.88837e+06	2.20763e+06	2.11511e+06
DG(18:1_20:3)	DG	M+NH4	662.572	14.8492	C41 H76 O5 N1	2.60078e+06	54384.3	3.73963e+06	4.27825e+06	5.04585e+06	3.04971e+06	1.07776e+06	2.93994e+06	3.98152e+06	3.50498e+06	3.08708e+06	2.18416e+06	1.6926e+06	3.15418e+06	1.21689e+06	2.50208e+06
DG(16:0_22:4)	DG	M+NH4	662.572	15.1217	C41 H76 O5 N1	626804	209460	536764	1.87807e+06	408786	137697	148648	1.72913e+06	1.60317e+06	1.97977e+06	1.12289e+06	1.27835e+06	748152	1.23247e+06	446977	560401
DG(18:0_20:4)	DG	M+Na	667.527	15.5102	C41 H72 O5 Na1	1.04088e+07	188166	1.28448e+07	1.55786e+07	2.824e+07	2.16221e+07	4.55698e+06	3.411e+07	2.66738e+07	2.74142e+07	1.90683e+07	1.75726e+07	1.57744e+07	2.08803e+07	1.82623e+07	1.46369e+07
DG(18:1_20:4)	DG	M+H	643.53	15.629	C41 H71 O5	4.16421e+07	1.01198e+06	5.53843e+07	6.7023e+07	5.84674e+07	4.24331e+07	9.23288e+06	4.15232e+07	4.27832e+07	4.34635e+07	2.98945e+07	2.57053e+07	2.8956e+07	3.70814e+07	3.75185e+07	3.22035e+07
DG(16:0_22:6)	DG	M+NH4	658.541	13.7184	C41 H72 O5 N1	4.30522e+06	9092.92	4.32191e+06	6.14144e+06	1.02591e+07	6.48824e+06	1.66635e+06	1.43696e+07	6.82222e+06	5.83887e+06	6.44736e+06	6.32668e+06	6.76166e+06	5.16555e+06	6.58078e+06	6.27295e+06
DG(18:1_20:5)	DG	M+H	641.514	14.5259	C41 H69 O5	1.25711e+06	151645	1.33334e+06	1.93402e+06	5.52769e+06	3.63594e+06	1.13557e+06	4.24477e+06	9.15899e+06	6.74655e+06	6.75015e+06	5.60448e+06	4.13417e+06	4.26359e+06	4.43087e+06	3.9149e+06
DG(16:0_24:0)	DG	M+NH4	698.666	18.9311	C43 H88 O5 N1	380121	395738	461340	404574	2.3557e+06	1.48376e+06	453866	1.333e+06	299420	939228	1.15509e+06	342307	778621	426295	357351	462032
DG(16:0_24:1)	DG	M+NH4	696.65	18.2565	C43 H86 O5 N1	1.13708e+06	33005.1	1.40112e+06	1.04305e+06	3.25383e+06	2.22251e+06	399859	3.35143e+06	843921	942811	802540	541494	1.08772e+06	1.30259e+06	1.07925e+06	789593
DG(18:1_22:1)	DG	M+NH4	694.634	17.563	C43 H84 O5 N1	1.75679e+06	3751.01	3.32698e+06	2.75623e+06	3.4494e+06	2.44153e+06	260047	2.80009e+06	1.67513e+06	1.70311e+06	1.27411e+06	1.1353e+06	1.1329e+06	1.57852e+06	1.18382e+06	960943
DG(18:0_22:4)	DG	M+NH4	690.603	16.2512	C43 H80 O5 N1	133755	0	134659	253620	773063	1.74803e+06	22005.6	3.51604e+06	510798	727573	383686	1.52803e+06	562629	1.51872e+06	94272.3	435127
DG(18:1_22:4)	DG	M+NH4	688.587	15.221	C43 H78 O5 N1	2.65264e+06	14869.9	3.94435e+06	3.36112e+06	3.86245e+06	1.74593e+06	314861	4.5068e+06	3.87503e+06	4.10593e+06	2.56313e+06	3.29665e+06	3.34224e+06	2.65126e+06	1.77063e+06	2.98893e+06
DG(18:0_22:5)	DG	M+Na	693.543	15.4906	C43 H74 O5 Na1	5.04322e+06	82985.2	6.49668e+06	7.80265e+06	2.20298e+06	1.19974e+06	78917.1	2.62426e+06	2.24955e+06	2.21788e+06	1.46329e+06	1.30307e+06	2.011e+06	2.75305e+06	2.60275e+06	1.7289e+06
DG(18:1_22:5)	DG	M+NH4	686.572	14.243	C43 H76 O5 N1	6.66402e+06	82339.6	5.93431e+06	5.89258e+06	1.20597e+06	497692	45466.2	2.08643e+06	1.14918e+06	1.2388e+06	1.24649e+06	1.52117e+06	1.74207e+06	2.06325e+06	1.71727e+06	1.71243e+06
DG(18:0_22:6)	DG	M+NH4	686.572	15.0695	C43 H76 O5 N1	5.71553e+06	8110.38	7.72517e+06	9.61012e+06	6.9067e+06	3.92352e+06	533384	9.63017e+06	2.30427e+06	2.52744e+06	1.80445e+06	1.66287e+06	3.59596e+06	3.8846e+06	3.41408e+06	2.7136e+06
DG(18:1_22:6)	DG	M+NH4	684.556	13.7718	C43 H74 O5 N1	7.04002e+06	6034.95	7.19844e+06	9.77461e+06	1.1112e+07	6.13391e+06	1.3242e+06	1.24405e+07	5.70877e+06	4.61939e+06	5.24523e+06	5.48635e+06	3.6254e+06	5.41031e+06	6.42259e+06	6.323e+06
DG(26:0_16:0)	DG	M+NH4	726.697	19.4456	C45 H92 O5 N1	38407.8	0	145440	60465.3	2.39507e+06	1.92293e+06	392616	1.58444e+06	52588.8	129225	38356.4	55166.4	473535	559174	345928	294762
DG(26:1_16:0)	DG	M+NH4	724.681	18.8681	C45 H90 O5 N1	1.68864e+06	2968.92	2.46807e+06	1.51593e+06	5.55782e+06	4.19797e+06	667909	6.30701e+06	709111	1.06471e+06	934041	888344	1.30215e+06	1.94608e+06	688203	598085
DG(18:1_24:1)	DG	M+NH4	722.666	18.26	C45 H88 O5 N1	2.83239e+06	1123.53	3.52438e+06	3.13796e+06	3.03491e+06	2.29927e+06	266371	4.3422e+06	1.12405e+06	1.18062e+06	1.11412e+06	943881	1.48665e+06	1.87958e+06	1.45652e+06	1.47012e+06
DG(26:0_18:1)	DG	M+NH4	752.713	19.4357	C47 H94 O5 N1	545680	0.146	1.19486e+06	696605	3.60693e+06	2.9462e+06	501791	3.26542e+06	347301	404844	332519	298319	790436	1.03185e+06	721500	750303
DG(26:1_18:1)	DG	M+NH4	750.697	18.835	C47 H92 O5 N1	2.66521e+06	5892.03	3.75681e+06	3.31074e+06	2.41801e+06	1.98795e+06	300957	3.68557e+06	892485	989122	916935	809450	1.49717e+06	1.55163e+06	1.21074e+06	1.2286e+06
DG(26:1_18:2)	DG	M+NH4	748.681	18.333	C47 H90 O5 N1	534856	3569.58	672970	615477	743493	543026	72984.9	1.61954e+06	478337	534625	461249	436767	431871	520615	424794	423529
DGDG(16:0_16:0)	DGDG	M+NH4	910.646	13.832	C47 H92 O15 N1	652921	9563.69	720516	1.06171e+06	614433	457829	57697.6	64825.9	0	36625.3	76710.1	0.259	372183	358166	353950	430754
Hex1Cer(d18:0_14:0)	Hex1Cer	M+H	674.557	11.3791	C38 H76 O8 N1	0	0	23631	0	764508	669037	112288	1.26102e+06	319740	693536	403919	475445	418712	246730	274050	301940
Hex1Cer(d18:1_14:0)	Hex1Cer	M+H	672.541	10.8683	C38 H74 O8 N1	1.12615e+06	40772.3	843172	772680	3.34287e+06	3.07697e+06	800271	7.70223e+06	2.44974e+06	3.81603e+06	3.27946e+06	2.99869e+06	2.16195e+06	1.79758e+06	2.01941e+06	2.18825e+06
Hex1Cer(d17:1_16:0)	Hex1Cer	M+H	686.557	11.6236	C39 H76 O8 N1	1.12626e+06	4300.82	824622	950918	2.42173e+06	2.22051e+06	414370	7.73327e+06	1.27052e+06	1.96198e+06	1.68783e+06	1.53729e+06	1.57045e+06	1.27991e+06	1.45785e+06	1.54571e+06
Hex1Cer(d18:0_16:0)	Hex1Cer	M+H	702.588	12.9099	C40 H80 O8 N1	3.98844e+06	37323	3.59867e+06	3.31246e+06	2.26098e+07	1.98213e+07	4.46567e+06	3.13394e+07	1.09797e+07	1.63393e+07	1.3484e+07	1.24618e+07	1.04398e+07	9.57459e+06	1.20949e+07	1.09775e+07
Hex1Cer(d18:1_16:0)	Hex1Cer	M+H	700.572	12.3783	C40 H78 O8 N1	6.81765e+07	1.07165e+06	5.47258e+07	7.00978e+07	1.78625e+08	1.56569e+08	5.43638e+07	2.75005e+08	1.01842e+08	1.44111e+08	6.54733e+07	1.31759e+08	1.1954e+08	9.41493e+07	1.1292e+08	1.07063e+08
Hex1Cer(d18:1_16:0+O)	Hex1Cer	M+H	716.567	12.052	C40 H78 O9 N1	448893	3357.55	270935	0	592805	511211	419609	388446	283933	991162	576663	469367	312448	212141	232049	540453
Hex1Cer(d18:2_16:0)	Hex1Cer	M+H	698.557	11.0901	C40 H76 O8 N1	1.14398e+06	0	785816	707391	3.21066e+06	3.07771e+06	804115	7.54031e+06	2.59765e+06	3.51014e+06	3.36139e+06	3.06337e+06	2.19373e+06	1.81566e+06	2.03187e+06	2.07775e+06
Hex1Cer(d18:1_17:0)	Hex1Cer	M+H	714.588	13.1129	C41 H80 O8 N1	832036	0	489473	525327	2.58667e+06	2.45253e+06	657884	7.9824e+06	2.65846e+06	3.61155e+06	2.37726e+06	2.61688e+06	1.87742e+06	1.67933e+06	1.7595e+06	1.51687e+06
Hex1Cer(d18:0_18:0)	Hex1Cer	M+H	730.619	14.3103	C42 H84 O8 N1	170888	0	84207.4	69209.6	2.90058e+06	2.82106e+06	581186	6.24293e+06	2.11458e+06	3.02112e+06	1.91786e+06	1.90455e+06	1.19484e+06	1.48733e+06	1.04859e+06	1.22757e+06
Hex1Cer(d18:1_18:0)	Hex1Cer	M+H	728.603	13.8146	C42 H82 O8 N1	4.46478e+06	92270.4	4.09716e+06	5.24299e+06	3.65099e+07	2.98048e+07	7.24581e+06	5.91336e+07	2.22513e+07	3.37776e+07	1.56398e+07	2.13948e+07	1.35802e+07	1.7423e+07	1.89618e+07	1.84908e+07
Hex1Cer(d18:2_18:0)	Hex1Cer	M+H	726.588	12.4781	C42 H80 O8 N1	46358.2	0	65783.3	21033.6	1.22332e+06	1.21139e+06	335728	2.451e+06	1.09428e+06	1.5396e+06	1.30024e+06	1.49778e+06	939005	671614	840208	1.16475e+06
Hex1Cer(d18:0_20:0)	Hex1Cer	M+H	758.65	15.5814	C44 H88 O8 N1	145033	1336.03	224369	302318	2.00089e+06	1.86183e+06	379993	2.64641e+06	1.41899e+06	2.08514e+06	1.42521e+06	1.24915e+06	796629	1.11383e+06	857248	827696
Hex1Cer(d18:1_20:0)	Hex1Cer	M+H	756.635	15.1324	C44 H86 O8 N1	3.16187e+06	8625.39	3.47573e+06	3.56399e+06	1.71689e+07	1.612e+07	2.88508e+06	2.32647e+07	9.12371e+06	1.51936e+07	8.27531e+06	8.84626e+06	7.64449e+06	8.41657e+06	6.52008e+06	6.45089e+06
Hex1Cer(d18:1_21:0)	Hex1Cer	M+H	770.65	15.7653	C45 H88 O8 N1	594987	1401.43	616550	569006	1.16443e+06	1.06085e+06	172751	1.77382e+06	818395	1.30974e+06	784189	807890	579852	717773	608409	594971
Hex1Cer(d18:0_22:0)	Hex1Cer	M+H	786.682	16.7032	C46 H92 O8 N1	1.53936e+06	2095.35	1.64306e+06	1.50898e+06	8.91609e+06	8.28724e+06	1.8115e+06	1.23224e+07	6.33025e+06	8.98679e+06	6.39008e+06	6.10857e+06	4.32633e+06	4.82776e+06	4.03316e+06	4.34083e+06
Hex1Cer(d18:1_22:0)	Hex1Cer	M+H	784.666	16.3374	C46 H90 O8 N1	2.94446e+07	67533.1	3.07994e+07	4.23341e+07	1.02704e+08	9.30749e+07	1.91243e+07	1.2472e+08	7.01281e+07	1.08268e+08	5.32313e+07	5.96774e+07	4.3062e+07	5.43021e+07	5.51765e+07	4.07992e+07
Hex1Cer(d18:1_22:0+O)	Hex1Cer	M+H	800.661	16.0572	C46 H90 O9 N1	358349	8610.83	389607	123848	136945	140067	23430.7	139445	122175	249021	163750	121203	73585.8	190440	135001	82732
Hex1Cer(d18:1_22:1)	Hex1Cer	M+H	782.65	15.0432	C46 H88 O8 N1	2.45976e+06	17170.8	2.65957e+06	3.01148e+06	895456	770189	147556	1.91854e+06	2.52145e+06	3.74384e+06	1.84684e+06	2.07294e+06	1.43974e+06	1.66237e+06	1.53221e+06	1.19781e+06
Hex1Cer(d18:0_23:0)	Hex1Cer	M+H	800.697	17.135	C47 H94 O8 N1	360887	0	290615	331086	1.07499e+06	834616	147815	1.68066e+06	552280	802157	610459	559074	473714	526136	428487	406194
Hex1Cer(d18:1_23:0)	Hex1Cer	M+H	798.682	16.8363	C47 H92 O8 N1	1.0508e+07	154725	1.03405e+07	1.01179e+07	1.68312e+07	1.4924e+07	2.83187e+06	2.23297e+07	8.94454e+06	1.36973e+07	9.0182e+06	9.04058e+06	8.5435e+06	9.42528e+06	7.7365e+06	8.26747e+06
Hex1Cer(d18:1_23:1)	Hex1Cer	M+H	796.666	15.6312	C47 H90 O8 N1	3.16122e+06	36890.2	3.55276e+06	3.36458e+06	1.42908e+06	1.51168e+06	219843	3.75196e+06	3.67714e+06	5.79955e+06	3.31658e+06	2.96566e+06	2.4373e+06	2.33321e+06	2.1662e+06	2.15653e+06
Hex1Cer(d18:0_24:0)	Hex1Cer	M+H	814.713	17.5619	C48 H96 O8 N1	3.62978e+06	20729	3.71773e+06	3.52678e+06	2.04795e+07	1.86501e+07	4.18858e+06	2.29049e+07	7.05396e+06	1.0211e+07	6.58299e+06	6.34459e+06	7.06261e+06	7.62219e+06	5.61953e+06	5.74104e+06
Hex1Cer(d18:0_24:1)	Hex1Cer	M+H	812.697	16.6062	C48 H94 O8 N1	4.02357e+06	26815.3	3.41564e+06	4.18604e+06	6.28569e+06	6.26239e+06	1.66843e+06	1.13759e+07	6.3602e+06	9.97647e+06	6.72649e+06	6.31184e+06	4.61381e+06	5.58387e+06	3.79773e+06	4.64942e+06
Hex1Cer(d18:1_24:0)	Hex1Cer	M+H	812.697	17.2816	C48 H94 O8 N1	9.88472e+07	1.58686e+06	9.44796e+07	8.77854e+07	2.77171e+08	2.49001e+08	5.01163e+07	3.24547e+08	1.00847e+08	1.67385e+08	1.0237e+08	9.83403e+07	1.05423e+08	1.17285e+08	1.02664e+08	9.82285e+07
Hex1Cer(d18:1_24:0+O)	Hex1Cer	M+H	828.692	17.0812	C48 H94 O9 N1	2.01728e+07	246773	1.97179e+07	1.9347e+07	1.48675e+06	1.20694e+06	279335	1.89118e+06	1.15126e+06	1.60831e+06	954654	910381	886121	1.15912e+06	1.09817e+06	1.02438e+06
Hex1Cer(d18:2_24:0)	Hex1Cer	M+H	810.682	16.242	C48 H92 O8 N1	1.11855e+08	2.76913e+06	1.2653e+08	1.22053e+08	6.1079e+07	5.59283e+07	1.04378e+07	1.4201e+08	9.73757e+07	1.53372e+08	9.14243e+07	8.52622e+07	7.2846e+07	8.32649e+07	8.33514e+07	6.35566e+07
Hex1Cer(d18:1_24:1)	Hex1Cer	M+H	810.682	17.066	C48 H92 O8 N1	7.08487e+06	100540	6.1853e+06	6.18593e+06	35580.3	121049	22642.2	17802.6	41914.2	26136.6	40786.4	15685.3	1.21007e+06	1.60585e+06	1.26643e+06	1.33656e+06
Hex1Cer(d42:2+O)	Hex1Cer	M+H	826.677	15.9494	C48 H92 O9 N1	1.2816e+07	365423	1.30371e+07	1.53112e+07	1.34348e+07	1.05127e+07	781589	8.73307e+06	1.18404e+07	1.47691e+07	9.23885e+06	7.8054e+06	2.31716e+06	1.0094e+07	2.17605e+06	8.7715e+06
Hex1Cer(d18:2_24:1)	Hex1Cer	M+H	808.666	15.1043	C48 H90 O8 N1	4.10747e+06	18027.7	4.65535e+06	4.94811e+06	2.65196e+06	3.31247e+06	617853	1.02137e+07	7.82784e+06	1.20323e+07	6.95039e+06	7.30681e+06	4.5733e+06	5.20081e+06	4.06973e+06	3.94586e+06
Hex1Cer(d18:1_24:2)	Hex1Cer	M+H	808.666	15.9639	C48 H90 O8 N1	2.60461e+06	49279.6	2.33246e+06	3.08205e+06	815552	588054	87165.4	1.09075e+06	4092.62	4032.34	8721.87	684754	454227	1.15993e+06	1.0963e+06	251246
Hex1Cer(d18:1_25:0)	Hex1Cer	M+H	826.713	17.5868	C49 H96 O8 N1	708911	89110.7	689686	598777	2.64886e+06	2.50635e+06	1256	75654.5	1.15651e+06	1.83123e+06	4.1806e+06	1.10528e+06	1.21935e+06	1.25911e+06	974591	39646.8
Hex1Cer(d18:1_25:1)	Hex1Cer	M+H	824.697	16.7291	C49 H94 O8 N1	5.23771e+06	99378	5.749e+06	4.76856e+06	2.44008e+06	2.44181e+06	471984	6.17703e+06	3.90807e+06	6.03177e+06	3.83383e+06	3.58558e+06	3.58566e+06	4.00834e+06	3.28934e+06	2.87569e+06
Hex1Cer(d43:2+O)	Hex1Cer	M+H	840.692	16.4695	C49 H94 O9 N1	1.71743e+06	5076.82	1.3215e+06	1.17475e+06	177405	224521	1489.94	284656	150729	298410	22567.1	177505	342803	458556	308931	353214
Hex1Cer(d18:0_26:0)	Hex1Cer	M+H	842.744	18.262	C50 H100 O8 N1	1.05193e+06	0.173	800395	854078	1.55031e+06	1.18662e+06	241581	1.48521e+06	310942	472402	364617	352745	570543	604603	553757	565662
Hex1Cer(d44:1)	Hex1Cer	M+H	840.729	17.4928	C50 H98 O8 N1	1.11677e+06	895.45	1.24396e+06	1.10504e+06	1.02239e+06	747239	40128	1.3588e+06	252959	762358	428029	391962	588778	715006	565266	600417
Hex1Cer(d20:1_24:0)	Hex1Cer	M+H	840.729	18.0274	C50 H98 O8 N1	1.53234e+07	268029	1.60493e+07	1.48961e+07	9.08994e+06	8.06769e+06	1.56657e+06	1.27641e+07	3.27555e+06	5.92539e+06	3.83703e+06	3.42543e+06	6.14866e+06	6.14953e+06	5.38151e+06	4.97359e+06
Hex1Cer(d20:1_24:0+O)	Hex1Cer	M+H	856.724	16.7437	C50 H98 O9 N1	1.93899e+07	464370	1.8642e+07	1.83185e+07	107557	78307.3	5384.77	42451.4	45377.5	180276	180136	100865	3.9514e+06	4.32181e+06	3.63228e+06	3.85501e+06
Hex1Cer(d18:1_26:1)	Hex1Cer	M+H	838.713	17.1899	C50 H96 O8 N1	2.75216e+07	412732	2.42107e+07	2.2106e+07	6.4016e+06	6.51535e+06	653255	1.27165e+07	7.70362e+06	1.29162e+07	8.04578e+06	7.63347e+06	9.61342e+06	9.84559e+06	9.19373e+06	8.95437e+06
Hex1Cer(d20:1_24:1)	Hex1Cer	M+H	838.713	17.847	C50 H96 O8 N1	1.23541e+06	0	924879	1.20507e+06	166696	91222.9	1041.82	79511.9	0	0	1071.52	4910.87	172572	164528	187182	182052
Hex1Cer(d44:2+O)	Hex1Cer	M+H	854.708	16.9829	C50 H96 O9 N1	6.52745e+06	94779.3	5.98448e+06	5.62605e+06	928305	1.21987e+06	291624	1.0721e+06	799630	1.07407e+06	549169	474426	1.40377e+06	1.74067e+06	1.42279e+06	1.24159e+06
Hex1Cer(d18:1_26:2)	Hex1Cer	M+H	836.697	16.2868	C50 H94 O8 N1	474525	0	551373	4.14292e+06	546168	576831	60423.5	5.03232e+06	1.35689e+06	2.75527e+06	1.62537e+06	1.29754e+06	985179	951289	924433	525017
Hex1Cer(d20:1_26:1)	Hex1Cer	M+H	866.744	17.9264	C52 H100 O8 N1	1.30428e+06	4067.88	1.16859e+06	1.22004e+06	543829	234621	54996.5	283095	126185	200941	140906	119544	278249	287367	231314	276288
Hex1Cer(m40:2)	Hex1Cer	M+H	766.656	16.3289	C46 H88 O7 N1	2.49921e+06	17020.2	3.11975e+06	4.14252e+06	1.04386e+07	1.02287e+07	1.7009e+06	1.5928e+07	6.75757e+06	1.06225e+07	5.07486e+06	6.93825e+06	4.44499e+06	5.92485e+06	3.78797e+06	4.17227e+06
Hex1Cer(m41:2)	Hex1Cer	M+H	780.671	16.817	C47 H90 O7 N1	1.08482e+06	3416.69	1.15145e+06	1.10572e+06	1.76791e+06	1.79372e+06	311452	2.55391e+06	966534	1.52128e+06	996562	937583	974286	1.01906e+06	762336	898457
Hex1Cer(m42:1+O)	Hex1Cer	M+H	812.697	16.606	C48 H94 O8 N1	4.21515e+06	77979.2	4.17124e+06	4.16692e+06	6.26059e+06	5.54323e+06	1.11057e+06	1.14561e+07	6.63077e+06	1.04346e+07	6.43388e+06	6.30818e+06	4.34276e+06	4.76644e+06	4.69869e+06	4.48201e+06
Hex1Cer(m42:2)	Hex1Cer	M+H	794.687	17.2766	C48 H92 O7 N1	1.2121e+07	175015	1.14235e+07	1.04622e+07	3.3141e+07	2.9956e+07	6.28515e+06	3.96704e+07	1.20275e+07	2.02901e+07	1.24974e+07	1.20495e+07	1.25369e+07	1.37512e+07	1.23006e+07	1.17875e+07
Hex1Cer(m42:3)	Hex1Cer	M+H	792.671	16.2359	C48 H90 O7 N1	1.26639e+07	257364	1.41379e+07	1.42184e+07	6.73453e+06	6.45791e+06	1.10008e+06	1.42319e+07	1.05851e+07	1.76647e+07	1.00836e+07	9.76156e+06	8.41382e+06	9.30947e+06	8.82465e+06	7.08056e+06
Hex1Cer(m44:2)	Hex1Cer	M+H	822.718	18.023	C50 H96 O7 N1	1.88694e+06	3293.78	1.93091e+06	1.77087e+06	1.08246e+06	980796	154140	1.57162e+06	347739	696286	413945	365968	705922	708490	589147	560566
Hex1Cer(m44:3)	Hex1Cer	M+H	820.702	17.1936	C50 H94 O7 N1	2.96107e+06	20042.7	2.90456e+06	2.5238e+06	501862	552256	101565	1.46402e+06	893890	1.41546e+06	870708	724725	1.15021e+06	1.02353e+06	1.03357e+06	1.07312e+06
Hex1Cer(t18:0_16:0)	Hex1Cer	M+H	718.583	11.6436	C40 H80 O9 N1	1.77841e+07	294519	1.29201e+07	1.35838e+07	1.01999e+06	958439	196307	2.42213e+06	749495	978866	971552	833241	3.90401e+06	3.7481e+06	3.79295e+06	4.10471e+06
Hex1Cer(t18:0_20:0)	Hex1Cer	M+H	774.645	14.4565	C44 H88 O9 N1	776883	1110.97	767810	709578	8.07351e+06	6.74975e+06	1.32394e+06	3.54401e+06	3.83455e+06	4.92519e+06	3.28464e+06	2.69381e+06	2.06283e+06	2.40179e+06	1.88694e+06	1.93035e+06
Hex1Cer(t18:0_22:0)	Hex1Cer	M+H	802.677	15.7267	C46 H92 O9 N1	1.31304e+07	244016	1.38773e+07	1.42953e+07	1.98157e+06	4.63844e+06	749249	3.19119e+06	2.45764e+06	3.57431e+06	2.15913e+06	1.91912e+06	4.52542e+06	5.66855e+06	4.92587e+06	4.57234e+06
Hex1Cer(t18:0_24:0)	Hex1Cer	M+H	830.708	16.8007	C48 H96 O9 N1	4.83797e+07	899386	4.51267e+07	4.59155e+07	6.25733e+06	5.74715e+06	1.12135e+06	5.03934e+06	2.19366e+06	2990874	2.07176e+06	1.94662e+06	1.14438e+07	1.2765e+07	1.01903e+07	1.10472e+07
Hex1Cer(t18:0_24:0+O)	Hex1Cer	M+H	846.703	16.7887	C48 H96 O10 N1	5.18389e+06	169555	5.89805e+06	5.11207e+06	5.68494e+06	4.54635e+06	454988	7.9103e+06	2.005e+06	2.87036e+06	1.71672e+06	98798.3	3.48916e+06	2.31875e+06	3.12886e+06	3.25086e+06
Hex1Cer(t18:0_24:1)	Hex1Cer	M+H	828.692	15.6235	C48 H94 O9 N1	7.76752e+07	1.56022e+06	8.72262e+07	9.25811e+07	518871	1.86405e+06	316604	1.85394e+06	1.96448e+06	2.84358e+06	1.54618e+06	957359	1.5933e+07	2.04288e+07	1.90535e+07	1.70049e+07
Hex1Cer(t42:1+O)	Hex1Cer	M+H	844.687	15.4412	C48 H94 O10 N1	3.77538e+06	60776.1	3.71506e+06	4.04765e+06	99587.4	38088.3	4983.82	79776.3	20481.2	68925.2	8033.94	24887.9	665583	938260	756076	730069
Hex1Cer(t20:0_24:0)	Hex1Cer	M+H	858.739	17.6488	C50 H100 O9 N1	9.08688e+06	213163	8.06496e+06	8.10005e+06	163315	127057	7278.85	95069.7	8051.31	102287	56230.7	38961.5	1.75083e+06	1.99757e+06	1.66762e+06	1.74098e+06
Hex1Cer(t18:0_26:1)	Hex1Cer	M+H	856.724	16.7282	C50 H98 O9 N1	1.93063e+07	375898	1.86453e+07	1.82504e+07	232542	166161	21656.4	178931	130576	169926	174437	100865	3.92239e+06	4.32158e+06	3.6998e+06	3.97512e+06
Hex1Cer(t44:1+O)	Hex1Cer	M+H	872.719	16.5942	C50 H98 O10 N1	1.32757e+06	1439.43	588577	1.16869e+06	1.125	2.4014e+07	4.18728e+06	1.09882e+07	7.28835e+06	9.62079e+06	3.22475e+06	0.652	228366	212181	225878	236352
Hex1Cer(t44:2)	Hex1Cer	M+H	854.708	16.9889	C50 H96 O9 N1	6.52745e+06	94779.3	5.98448e+06	5.62605e+06	1.7905e+06	1.21987e+06	267523	1.0721e+06	799630	1.07407e+06	549169	474426	1.40377e+06	1.74067e+06	1.42279e+06	1.24159e+06
Hex2Cer(d18:1_14:0)	Hex2Cer	M+H	834.594	10.4558	C44 H84 O13 N1	50973.7	1519.93	11876.6	8082.37	1.46997e+06	1.419e+06	432578	3.50321e+06	2.516e+06	4.36524e+06	3.4468e+06	2.92319e+06	1.80117e+06	1.26304e+06	1.72037e+06	1.68974e+06
Hex2Cer(d17:1_16:0)	Hex2Cer	M+H	848.609	11.2067	C45 H86 O13 N1	0	0	0	0	2.92499e+06	2.49275e+06	1.3688e+06	5.90017e+06	2.3915e+06	5.52227e+06	6.54877e+06	6.01652e+06	3.40698e+06	2.05947e+06	3.13631e+06	3.44767e+06
Hex2Cer(d34:0)	Hex2Cer	M+H	864.641	12.4852	C46 H90 O13 N1	0	0	31622.4	0	5.67156e+06	5.93054e+06	1.5628e+06	7.57102e+06	7.99302e+06	8.37803e+06	7.92035e+06	9.90213e+06	4.93133e+06	3.71545e+06	5.94976e+06	4.56905e+06
Hex2Cer(d18:1_16:0)	Hex2Cer	M+H	862.625	11.976	C46 H88 O13 N1	1.06506e+06	33204.7	192964	389943	6.36901e+07	5.81805e+07	2.47568e+07	1.00835e+08	9.06413e+07	1.16092e+08	1.34407e+08	1.09005e+08	6.79995e+07	4.17534e+07	6.01108e+07	4.86275e+07
Hex2Cer(d18:2_16:0)	Hex2Cer	M+H	860.609	10.6179	C46 H86 O13 N1	0	0	0	0	1.11448e+06	1.00007e+06	284490	3.20596e+06	1.87957e+06	3.18426e+06	2.58083e+06	2.3089e+06	1.25819e+06	932387	1.15789e+06	1.26247e+06
Hex2Cer(d18:1_17:0)	Hex2Cer	M+H	876.641	12.7018	C47 H90 O13 N1	0	0	0	0	2.08217e+06	1.809e+06	434686	922412	3.46771e+06	4.34111e+06	2.64754e+06	3.38907e+06	1.64557e+06	1.7721e+06	2.03684e+06	409072
Hex2Cer(d18:1_18:0)	Hex2Cer	M+H	890.656	13.4243	C48 H92 O13 N1	171495	0	84283.4	3.801	1.09054e+07	9.47036e+06	3.71161e+06	1.57872e+07	1.73812e+07	1.87429e+07	1.70474e+07	1.60258e+07	9.86671e+06	7.50244e+06	4.75061e+06	8.97854e+06
Hex2Cer(d18:2_18:0)	Hex2Cer	M+H	888.641	12.1147	C48 H90 O13 N1	0	0	0	0	555411	427196	113433	1.70851e+06	1.16155e+06	2.19583e+06	1.45468e+06	1.11671e+06	634114	480725	435327	575486
Hex2Cer(d18:1_20:0)	Hex2Cer	M+H	918.688	14.7406	C50 H96 O13 N1	5192	0	7822.77	15224.9	9.72753e+06	7.85401e+06	1.91347e+06	7.30727e+06	1.43253e+07	1.64684e+07	1.34767e+07	1.07283e+07	5.22152e+06	6.39805e+06	5.06446e+06	4.9288e+06
Hex2Cer(d39:1)	Hex2Cer	M+H	932.703	15.3447	C51 H98 O13 N1	0	0	0	0	847858	807965	112758	723465	1.26588e+06	1.582e+06	1.17828e+06	1.09223e+06	552891	610706	482734	500843
Hex2Cer(d40:0)	Hex2Cer	M+H	948.735	16.3484	C52 H102 O13 N1	517032	0	435987	510598	6.68865e+06	6.42516e+06	616448	6.4883e+06	7.26406e+06	7.88571e+06	7.0268e+06	6.91042e+06	3.83869e+06	3.49365e+06	3.89935e+06	2.53762e+06
Hex2Cer(d18:1_22:0)	Hex2Cer	M+H	946.719	15.9547	C52 H100 O13 N1	369448	0	194237	384655	4.54369e+07	3.79475e+07	7.94013e+06	2.54262e+07	5.65294e+07	6.43125e+07	5.43162e+07	4.26408e+07	2.33234e+07	2.77578e+07	2.27102e+07	2.25962e+07
Hex2Cer(d18:2_22:0)	Hex2Cer	M+H	944.703	14.6348	C52 H98 O13 N1	0	14383.4	0	0	1.70743e+06	1.66354e+06	456627	2.38625e+06	5.58735e+06	9.48181e+06	5.03647e+06	4.31583e+06	1.90677e+06	2.24087e+06	1.82294e+06	1.19044e+06
Hex2Cer(d18:1_23:0)	Hex2Cer	M+H	960.735	16.4859	C53 H102 O13 N1	253204	0	167313	200400	1.17731e+07	9.99188e+06	2.52711e+06	7.96488e+06	1.28793e+07	1.57816e+07	1.3867e+07	1.2341e+07	6.70457e+06	6.80935e+06	5.84321e+06	5.83523e+06
Hex2Cer(d18:1_23:1)	Hex2Cer	M+H	958.719	15.2367	C53 H100 O13 N1	11300.7	0	12434.6	19456	3.61942e+06	3.13378e+06	522575	5.6968e+06	6.69943e+06	1.25595e+07	6.02636e+06	6.0293e+06	2.89568e+06	3.49641e+06	2.8333e+06	2.91957e+06
Hex2Cer(d42:0)	Hex2Cer	M+H	976.766	17.266	C54 H106 O13 N1	151264	0	561702	136985	9.7423e+06	2.59629e+06	1.62668e+06	6.07486e+06	6.34864e+06	6.8777e+06	4.14305e+06	5.56405e+06	1.14261e+06	2.99069e+06	2.95869e+06	2.62895e+06
Hex2Cer(d18:1_24:0)	Hex2Cer	M+H	974.75	16.973	C54 H104 O13 N1	2.30045e+06	29908.1	1.98006e+06	2.11955e+06	1.34022e+08	1.15733e+08	2.63677e+07	9.55738e+07	1.22359e+08	1.3421e+08	1.1103e+08	9.41178e+07	5.65726e+07	7.13178e+07	5.87782e+07	5.23528e+07
Hex2Cer(d42:1+O)	Hex2Cer	M+H	990.745	15.229	C54 H104 O14 N1	594527	0	459587	639092	530550	517640	74013.8	690364	1.04931e+06	1.69694e+06	927685	976423	526778	689394	561197	569209
Hex2Cer(d18:1_24:1)	Hex2Cer	M+H	972.735	15.8318	C54 H102 O13 N1	2.02846e+06	63809.4	1.80614e+06	2.39245e+06	5.64545e+07	5.05434e+07	1.06181e+07	7.87835e+07	1.1331e+08	1.79253e+08	8.47817e+07	7.60362e+07	4.65869e+07	5.78596e+07	4.35898e+07	4.60726e+07
Hex2Cer(d18:2_24:1)	Hex2Cer	M+H	970.719	14.7382	C54 H100 O13 N1	39430.4	0	13976.4	13261.6	4.5688e+06	3.64844e+06	863562	9.26976e+06	1.17133e+07	2.06195e+07	1.05675e+07	8.99514e+06	4.74536e+06	5.88606e+06	4.51639e+06	4.56905e+06
Hex2Cer(d18:1_25:0)	Hex2Cer	M+H	988.766	17.2721	C55 H106 O13 N1	0.029	0	0.185	0.023	1.587e+06	1.318e+06	278665	1.61926e+06	1.27802e+06	1.73736e+06	1.28649e+06	1.13443e+06	718613	749351	704732	645412
Hex2Cer(d18:1_25:1)	Hex2Cer	M+H	986.75	16.3867	C55 H104 O13 N1	0	0	0	0	5.11019e+06	4.83547e+06	490039	6.3091e+06	7.95228e+06	1.34142e+07	6.97782e+06	6.81028e+06	4.10153e+06	3.96738e+06	3.75296e+06	3.23046e+06
Hex2Cer(d18:1_26:0)	Hex2Cer	M+H	1002.78	17.7654	C56 H108 O13 N1	575740	0	445694	524404	7.96562e+06	6.95607e+06	1.27721e+06	4.80467e+06	5.88318e+06	6.75335e+06	6.71186e+06	6.2641e+06	3.45581e+06	3.85363e+06	3.25014e+06	3.38465e+06
Hex2Cer(d18:1_26:1)	Hex2Cer	M+H	1000.77	16.8669	C56 H106 O13 N1	731690	10411.9	571114	693469	8.75218e+06	8.01829e+06	1.36942e+06	9.6355e+06	1.08894e+07	1.75501e+07	1.02712e+07	9.99082e+06	5.48149e+06	5.86955e+06	4.73822e+06	5.00368e+06
Hex2Cer(m34:2)	Hex2Cer	M+H	844.614	11.9725	C46 H86 O12 N1	74357.6	0.023	7214.78	45563.6	2.62329e+06	2.36475e+06	978686	4.77553e+06	4.30704e+06	5.82138e+06	6.25665e+06	4.44385e+06	2.61202e+06	1.77827e+06	2.3913e+06	1.25571e+06
Hex2Cer(m40:0+O)	Hex2Cer	M+H	948.735	16.3697	C52 H102 O13 N1	0.098	0	456373	528427	6.70312e+06	6.79414e+06	420177	6.92831e+06	7.2741e+06	7.87882e+06	7.06616e+06	6.91488e+06	2.83016e+06	3.80948e+06	3.5547e+06	2.56554e+06
Hex2Cer(m40:2)	Hex2Cer	M+H	928.708	15.9523	C52 H98 O12 N1	0	1696.04	0	0	2.21592e+06	1.80636e+06	410044	1.15044e+06	2.68059e+06	3.23966e+06	2.8533e+06	2.04949e+06	1.08031e+06	1.36491e+06	1.09927e+06	1.08764e+06
Hex2Cer(m42:2)	Hex2Cer	M+H	956.74	16.9652	C54 H102 O12 N1	14553.7	0	11551.2	0	6.58087e+06	5.45691e+06	1.29143e+06	4.56474e+06	5.79757e+06	6.31286e+06	5.30311e+06	4.35062e+06	2.60683e+06	3.2584e+06	2.76932e+06	2.52325e+06
Hex2Cer(m42:3)	Hex2Cer	M+H	954.724	15.8248	C54 H100 O12 N1	51584.4	0	17009.8	37376.4	2.72891e+06	2.48405e+06	501918	1.84295e+06	5.7516e+06	8.29523e+06	4.05916e+06	3.697e+06	2.26155e+06	2.76476e+06	2.2261e+06	2.12313e+06
Hex2Cer(t18:0_16:0)	Hex2Cer	M+H	880.636	11.2468	C46 H90 O14 N1	25001.4	418.151	0	151682	685089	562378	387886	240145	1.30609e+06	1.12228e+06	2.24776e+06	1.90779e+06	933342	427052	614637	731351
Hex2Cer(t42:0)	Hex2Cer	M+H	992.761	16.4563	C54 H106 O14 N1	427631	0	291663	279070	1.30002e+06	1.07277e+06	286352	371596	1.18352e+06	956890	1.30379e+06	1.05877e+06	680231	656588	493875	560864
Hex3Cer(d38:1)	Hex3Cer	M+H	1080.74	14.4556	C56 H106 O18 N1	89346.3	0	6407.02	40006.5	1.68118e+06	1.33527e+06	278382	578955	814534	684315	747113	691723	505811	589712	482715	456104
Hex3Cer(d18:1_22:0)	Hex3Cer	M+H	1108.77	15.6867	C58 H110 O18 N1	643252	2555.09	531773	813323	7.98171e+06	6.61069e+06	1.26102e+06	2.22019e+06	3.98136e+06	3.21487e+06	3.45904e+06	3.09923e+06	2.16764e+06	2.83708e+06	2.57418e+06	2.4177e+06
Hex3Cer(d42:2)	Hex3Cer	M+NH4	1151.81	15.5682	C60 H115 O18 N2	651881	0	407125	542073	1.6751e+06	1.4232e+06	303554	1.6408e+06	1.18493e+06	1.33163e+06	919918	866288	731922	947158	898036	761339
Hex3Cer(d44:1)	Hex3Cer	M+H	1164.83	17.584	C62 H118 O18 N1	589879	8162.24	460883	623671	1.69906e+06	1.28693e+06	273159	364401	495600	398913	489343	452022	478843	507329	412117	375936
Hex3Cer(d44:2)	Hex3Cer	M+H	1162.82	16.6486	C62 H116 O18 N1	1.18159e+06	39463.4	932985	1.35763e+06	1.58548e+06	1.40714e+06	272838	1.11409e+06	890289	1.06945e+06	861002	735961	846429	887493	760238	842250
LBPA(14:0_16:0)	LBPA	M+NH4	712.512	10.9823	C36 H75 O10 P1 N1	7.49609e+06	194631	4.2414e+06	5.67299e+06	338075	240326	167694	2.19318e+06	326041	553273	255999	178511	1.8854e+06	1.38705e+06	1.62709e+06	1.65508e+06
LBPA(16:0_16:0)	LBPA	M+H	723.517	12.3584	C38 H76 O10 P1	6.64375e+06	349291	4.02081e+06	6.78309e+06	1.73194e+06	1.5914e+06	774867	1.67644e+06	951388	1.22087e+06	841132	1.19156e+06	1.56414e+06	1.11203e+06	1.37472e+06	1.53156e+06
LBPA(16:0_16:1)	LBPA	M+NH4	738.528	12.386	C38 H77 O10 P1 N1	4.92171e+06	26180.2	4.89118e+06	6.01574e+06	8.63859e+06	7.79401e+06	5.6788e+06	7.97713e+06	6.98003e+06	7.22587e+06	6.98174e+06	8524257	9.21976e+06	7.55557e+06	9.65094e+06	8.58163e+06
LBPA(16:0_18:1)	LBPA	M+H	749.533	11.3437	C40 H78 O10 P1	1.80104e+06	0	819504	1.37741e+06	2.54565e+06	2.23516e+06	527431	2.07726e+06	347512	663800	595364	641265	1.28888e+06	891334	1.01939e+06	1.15567e+06
LBPA(16:1_18:1)	LBPA	M+H	747.517	11.2433	C40 H76 O10 P1	2.55383e+06	0.01	1.42229e+06	2.29068e+06	1.85843e+06	152806	452061	2.95721e+06	824205	1.06004e+06	1.53749e+06	1.47894e+06	1.71114e+06	1.1196e+06	1.50133e+06	1.47695e+06
LBPA(18:1_18:1)	LBPA	M+NH4	792.575	12.4237	C42 H83 O10 P1 N1	5.5534e+07	1.54533e+06	4.26076e+07	6.23804e+07	1.17216e+08	9.67595e+07	3.83432e+07	8.34237e+07	9.98954e+07	1.18388e+08	1.12647e+08	1.35873e+08	7.9473e+07	5.64525e+07	7.59568e+07	7.11219e+07
LBPA(16:0_20:4)	LBPA	M+NH4	788.544	11.125	C42 H79 O10 P1 N1	4.58137e+06	55264	2.7521e+06	3.55237e+06	436081	407061	110170	1.57323e+06	305456	527946	404190	642440	1.41214e+06	1.03606e+06	1.1298e+06	1.05029e+06
LBPA(18:1_20:3)	LBPA	M+NH4	816.575	10.4857	C44 H83 O10 P1 N1	1.25698e+06	3417.81	808317	1.15565e+06	931702	860280	174013	771314	176011	263252	208175	211958	576561	885207	545596	435093
LPC(14:0)	LPC	M+H	468.308	2.11948	C22 H47 O7 N1 P1	5.68302e+06	473222	5.08272e+06	4.53032e+06	1.82712e+06	1.5981e+06	868303	3.04573e+06	1.08785e+06	1.9033e+06	1.05776e+06	950125	2.30858e+06	2.43296e+06	2.29736e+06	2.18472e+06
LPC(14:1e)	LPC	M+H	452.314	2.29652	C22 H47 O6 N1 P1	1.77128e+06	96538	1.67935e+06	1.46582e+06	13541.3	207174	157694	9134.51	16412.4	474455	234408	220780	660192	648368	549833	609470
LPC(15:0)	LPC	M+H	482.324	2.61669	C23 H49 O7 N1 P1	1.72043e+06	89303.9	1.52305e+06	1.29145e+06	589635	492993	326434	1.11349e+06	571240	1.1416e+06	602950	448517	862419	835613	881034	770062
LPC(16:1)	LPC	M+H	494.324	2.14197	C24 H49 O7 N1 P1	3.64424e+06	214531	3.54882e+06	3.05868e+06	3.39033e+06	1.44427e+06	930725	3.51072e+06	1.11889e+06	1.30169e+06	1.12511e+06	976278	1.8769e+06	1.88175e+06	1.72646e+06	1.99797e+06
LPC(16:1e)	LPC	M+H	480.345	3.63068	C24 H51 O6 N1 P1	1.03859e+07	171944	9.35806e+06	6.87439e+06	6.99314e+06	8.46861e+06	3.43118e+06	1.22267e+07	5.05792e+06	1.00009e+07	6.92018e+06	5.71506e+06	7.21071e+06	7.24365e+06	7.03562e+06	6.65151e+06
LPC(17:0)	LPC	M+H	510.355	3.62931	C25 H53 O7 N1 P1	1.42905e+06	114025	1.32968e+06	1.07301e+06	796566	723230	254779	1.24833e+06	473473	963848	594602	512681	908505	690785	777475	855864
LPC(17:1)	LPC	M+H	508.34	2.57857	C25 H51 O7 N1 P1	345582	9552.09	330634	322261	1.27969e+06	646930	363491	1.74684e+06	501503	606604	536420	391197	555734	581191	582615	544159
LPC(18:0e)	LPC	M+H	510.392	5.62778	C26 H57 O6 N1 P1	372354	2566.6	31983.9	71230.2	5.52229e+06	8.15175e+06	2.74301e+06	7.69209e+06	2.72474e+06	5.45971e+06	6.09508e+06	5.00332e+06	3.96392e+06	3.8011e+06	3.75502e+06	3.61442e+06
LPC(18:1)	LPC	M+Na	544.337	3.16115	C26 H52 O7 N1 P1 Na1	2.34604e+06	1.36255e+06	1.75214e+06	1.92089e+06	1.89242e+06	1.94089e+06	1.65866e+06	2.78183e+06	1.72494e+06	1.51636e+06	1.82179e+06	1.68423e+06	2.5338e+06	2.53807e+06	2.19179e+06	2.08868e+06
LPC(18:1e)	LPC	M+H	508.376	5.34974	C26 H55 O6 N1 P1	1.36673e+07	177180	1.24819e+07	7.51339e+06	5.73138e+06	7.62286e+06	2.39534e+06	9.4946e+06	3.10197e+06	6.20095e+06	6.96698e+06	6.18316e+06	7.26944e+06	7.03308e+06	6.9361e+06	7.02903e+06
LPC(18:2)	LPC	M+H	520.34	2.36834	C26 H51 O7 N1 P1	603225	3793.53	998798	627064	3.81313e+06	1.85208e+06	1.32832e+06	6.52318e+06	2.11823e+06	2.53006e+06	2.05188e+06	1.62198e+06	2.11398e+06	2.02688e+06	2.00603e+06	1.92595e+06
LPC(18:2e)	LPC	M+H	506.361	3.80377	C26 H53 O6 N1 P1	1.83103e+06	3848.82	1.56285e+06	1.13149e+06	856508	1.02854e+06	523556	1.63019e+06	859975	1.90092e+06	990149	830735	1.16341e+06	1.1799e+06	1.14439e+06	1.08302e+06
LPC(19:0)	LPC	M+H	538.387	5.75	C27 H57 O7 N1 P1	241678	0	214551	118432	344272	531942	209128	1.30853e+06	222661	678031	454000	428587	430195	419251	432552	418965
LPC(19:1)	LPC	M+H	536.371	4.077	C27 H55 O7 N1 P1	821465	20347.8	816999	602073	710262	736955	267459	1.32974e+06	386569	800559	506532	534481	708533	647320	615776	612248
LPC(20:0)	LPC	M+H	552.402	6.78803	C28 H59 O7 N1 P1	1.4052e+06	932.037	1.04916e+06	580514	1.60177e+06	2.03954e+06	736774	3.91782e+06	486077	1.1899e+06	1.16728e+06	1.08099e+06	1.50633e+06	1.14566e+06	1.34476e+06	1.37216e+06
LPC(20:0e)	LPC	M+H	538.423	7.515	C28 H61 O6 N1 P1	801439	1781.06	384358	336750	1.24813e+06	1.01995e+06	481262	2.63003e+06	630722	945540	1.25208e+06	1.1754e+06	992934	600050	1.02472e+06	1.03848e+06
LPC(20:1)	LPC	M+H	550.387	4.91133	C28 H57 O7 N1 P1	5.75724e+06	283758	5.28799e+06	3.54396e+06	2.95182e+06	3.62683e+06	1.85278e+06	6.39657e+06	1.62927e+06	4.48907e+06	2.44809e+06	1.96745e+06	3.65121e+06	3.52001e+06	3.42458e+06	3.4373e+06
LPC(20:1e)	LPC	M+H	536.407	7.30402	C28 H59 O6 N1 P1	7.66372e+06	92290.2	3.71686e+06	3.53698e+06	2.64935e+06	2.45485e+06	1.06749e+06	4.78348e+06	1.42056e+06	2.26983e+06	2.81289e+06	2.58285e+06	3.70807e+06	2.0166e+06	3.30345e+06	3.54102e+06
LPC(20:4)	LPC	M+H	544.34	2.27972	C28 H51 O7 N1 P1	1.23572e+06	7622.32	1.05241e+06	1.16043e+06	2.04915e+06	1.71957e+06	1.60599e+06	6.90971e+06	1.67777e+06	3.13823e+06	2.81175e+06	1.99493e+06	2.58462e+06	2.11561e+06	2.04289e+06	2.18468e+06
LPC(20:5)	LPC	M+H	542.324	1.83619	C28 H49 O7 N1 P1	129355	0	98907.4	87600.2	102470	115264	1.31597e+06	3.54198e+06	348740	2.83404e+06	0	0	689605	641958	643071	651701
LPC(22:0)	LPC	M+H	580.434	8.34044	C30 H63 O7 N1 P1	623585	0.053	239537	263770	675876	631753	288870	2.08912e+06	132357	394341	385018	320217	656341	281991	529851	559452
LPC(22:1)	LPC	M+H	578.418	6.84771	C30 H61 O7 N1 P1	1.62971e+06	3746.58	1.13386e+06	705138	515642	615269	604576	1.6552e+06	495154	1.93171e+06	774881	667558	1.19366e+06	721963	1.1681e+06	1.06424e+06
LPC(22:5)	LPC	M+H	570.355	2.38959	C30 H53 O7 N1 P1	311638	4193.29	492998	430368	379449	235591	537655	1.11571e+06	379105	961547	511511	372534	735252	451835	699603	723717
LPC(22:6)	LPC	M+H	568.34	2.14397	C30 H51 O7 N1 P1	720357	0.096	758026	736872	933717	842576	2.67937e+06	7.66394e+06	1.48485e+06	9.15266e+06	1.02509e+06	624681	2.97612e+06	2.81817e+06	2.80603e+06	2.81672e+06
LPC(24:0)	LPC	M+H	608.465	9.90325	C32 H67 O7 N1 P1	3.07081e+06	11634.9	1.44063e+06	1.88482e+06	4.9835e+06	4.20299e+06	1.6599e+06	8.17063e+06	392382	1.05816e+06	880239	870897	2.79161e+06	1.34433e+06	2.71359e+06	2.27664e+06
LPC(24:1)	LPC	M+H	606.449	8.33519	C32 H65 O7 N1 P1	4.86367e+06	19750.9	2.1252e+06	2.14488e+06	2.30349e+06	1.9213e+06	878027	6.87836e+06	674100	1.4729e+06	1.16691e+06	1.2704e+06	2.4393e+06	1.37721e+06	2.52107e+06	2.54998e+06
LPC(26:0)	LPC	M+H	636.496	11.4652	C34 H71 O7 N1 P1	2.90231e+06	4761.43	1.86426e+06	2.2556e+06	8.76236e+06	7.61002e+06	2.29124e+06	1.05179e+07	614413	1.14353e+06	934821	956727	3.67014e+06	2.34185e+06	3.08472e+06	3.52881e+06
LPC(26:1)	LPC	M+H	634.481	9.85322	C34 H69 O7 N1 P1	6.23035e+06	77544.5	2.81936e+06	3.84945e+06	3.74449e+06	3.18388e+06	1.2493e+06	8.43391e+06	824741	1.36857e+06	1.42505e+06	1.25775e+06	3.36005e+06	1.74443e+06	3.22023e+06	2.96574e+06
LPC(28:0)	LPC	M+Na	686.51	11.2719	C36 H74 O7 N1 P1 Na1	368146	0	840695	263133	3.8975e+06	3.7182e+06	404562	1.62499e+07	3.21884e+06	4.20045e+06	2.25094e+06	2.20194e+06	2.18512e+06	3.92125e+06	2.74438e+06	2.20878e+06
LPC(28:1)	LPC	M+H	662.512	11.3702	C36 H73 O7 N1 P1	1.04706e+06	0	573009	692098	2.31147e+06	1.87754e+06	510541	3.40023e+06	326386	417421	515218	497833	1.01221e+06	618777	796703	1.09839e+06
LPC(30:0)	LPC	M+Na	714.541	12.7477	C38 H78 O7 N1 P1 Na1	1.43595e+06	2626.24	1.12942e+06	1.6334e+06	7.40507e+06	6.21043e+06	3.00195e+06	5.09412e+06	3.08037e+06	3.57454e+06	3.27656e+06	3.03952e+06	4.07547e+06	3.03182e+06	4.56281e+06	3.86222e+06
LPC(30:1)	LPC	M+Na	712.525	12.5363	C38 H76 O7 N1 P1 Na1	537218	12115.2	612982	920414	1.26606e+06	1.06766e+06	665291	709668	354493	433000	209954	274011	1.07357e+06	740358	810776	909207
LPC(32:0)	LPC	M+Na	742.572	14.1391	C40 H82 O7 N1 P1 Na1	9.29605e+06	83513.5	6.67709e+06	8.3359e+06	6.97346e+07	5.91504e+07	2.33684e+07	4.45298e+07	2.15756e+07	2.78031e+07	1.87425e+07	1.95207e+07	2.48544e+07	2.98527e+07	2.72195e+07	2.42038e+07
LPC(32:1)	LPC	M+Na	740.556	13.9407	C40 H80 O7 N1 P1 Na1	1.31688e+07	66519	9.60163e+06	1.39667e+07	1.44857e+07	1.2132e+07	4.83852e+06	1.38883e+07	4.79408e+06	5.52394e+06	3.72512e+06	3.13643e+06	1.01123e+07	8.49813e+06	9.19468e+06	8.89661e+06
LPC(33:0)	LPC	M+Na	756.588	14.7969	C41 H84 O7 N1 P1 Na1	160543	0	262834	295413	4.82958e+06	3.73113e+06	579769	4.40093e+06	2.94315e+06	4.11616e+06	2.44158e+06	2.31554e+06	2.72588e+06	2.24443e+06	1.63776e+06	1.78539e+06
LPC(34:0)	LPC	M+Na	770.603	15.4294	C42 H86 O7 N1 P1 Na1	1.95309e+06	21519	1.91794e+06	2.00816e+06	4.78096e+07	4.21663e+07	6.63269e+06	3.58446e+07	1.44059e+07	2.73648e+07	1.34111e+07	1.33206e+07	1.18591e+07	1.45467e+07	1.28444e+07	1.15577e+07
LPC(34:1)	LPC	M+Na	768.588	14.2026	C42 H84 O7 N1 P1 Na1	9.7453e+06	15249.5	6.907e+06	1.46845e+07	1.2014e+08	1.02992e+08	3.24888e+07	2.84752e+07	1.30788e+08	1.21946e+08	9.57659e+07	1.07888e+08	6.37791e+07	7.63957e+07	7.25964e+07	6.35883e+07
LPC(36:0)	LPC	M+Na	798.635	16.5665	C44 H90 O7 N1 P1 Na1	1.68688e+06	2537.38	1.59072e+06	1.72262e+06	1.74496e+06	1.47826e+06	302284	2.50558e+06	564480	939451	569768	604978	872008	925634	799080	872288
LPC(36:1)	LPC	M+Na	796.619	15.4711	C44 H88 O7 N1 P1 Na1	1.75829e+06	29857.4	1.63349e+06	1.65601e+06	3.11006e+07	2.81828e+07	4.04421e+06	1.80248e+07	1.38683e+07	1.95042e+07	8.3973e+06	1.10776e+07	7.83303e+06	1.04619e+07	8.42371e+06	7.33269e+06
LSM(d20:1)	LSM	M+H	493.376	4.06792	C25 H54 O5 N2 P1	2.10785e+06	1641	1.95425e+06	1345049	1.01288e+06	1.34453e+06	309378	1.47667e+06	677362	1.11407e+06	1.27058e+06	1.22582e+06	1.13682e+06	1.13692e+06	1.06323e+06	1.11979e+06
MGDG(30:0e)	MGDG	M+NH4	706.583	13.7756	C39 H80 O9 N1	146315	0	69342.3	77760.9	2.86866e+06	2.33687e+06	611242	1.45045e+06	1.43261e+06	2.18835e+06	1.6106e+06	1.81596e+06	704851	938177	1.08117e+06	1.09997e+06
MePC(17:1e)	MePC	M+Na	544.337	2.26983	C26 H52 O7 N1 P1 Na1	1.20219e+06	7247.05	965748	1.05782e+06	2.38166e+06	1.20649e+06	1.06361e+06	5.61255e+06	3.30516e+06	3.02408e+06	2.8556e+06	1.83477e+06	2.18867e+06	2.41562e+06	1.9452e+06	2.19267e+06
MePC(28:6)	MePC	M+Na	702.411	13.1981	C37 H62 O8 N1 P1 Na1	6.30348e+06	8.15824e+06	3.7555e+06	7.8106e+06	6.83025e+06	4.93769e+06	6.71647e+06	1.136e+07	5.95263e+06	6.41159e+06	6.66172e+06	7.61411e+06	7.29776e+06	1.36655e+07	1.42488e+07	7.99111e+06
MePC(29:0)	MePC	M+Na	728.52	10.5695	C38 H76 O8 N1 P1 Na1	7.5293e+06	86492.4	7.53844e+06	9.82222e+06	1.09004e+07	3.74372e+06	3.53123e+06	1.22291e+07	5.11625e+06	3.72882e+06	7.54381e+06	3.15083e+06	1.27272e+07	3.93966e+06	1.04045e+07	1.11403e+07
MePC(30:0)	MePC	M+Na	742.536	12.6676	C39 H78 O8 N1 P1 Na1	1.38004e+08	5.61059e+06	1.00532e+08	1.38223e+08	8.71725e+07	7.12719e+07	2.61029e+07	1.29222e+08	6.65756e+07	9.40374e+07	7.1817e+07	6.39304e+07	4.8491e+07	7.57714e+07	9.26327e+07	7.74192e+07
MePC(30:1e)	MePC	M+NH4	721.585	11.1937	C39 H82 O7 N2 P1	8.92261e+07	1.53779e+06	5.11932e+07	6.52659e+07	1.79901e+06	1.35571e+06	493448	1.92698e+06	1.52967e+06	1.9299e+06	2.42754e+06	2.15271e+06	2.28348e+07	1.50627e+07	1.98748e+07	2.06323e+07
MePC(30:2)	MePC	M+Na	738.504	11.2257	C39 H74 O8 N1 P1 Na1	172438	9906.1	87972.8	303864	1.20608e+06	1.37498e+06	526372	4.51797e+06	1.19269e+06	1.42803e+06	1.91312e+06	1.17587e+06	1.32901e+06	671257	1.32331e+06	1.53479e+06
MePC(30:2e)	MePC	M+NH4	719.57	9.72068	C39 H80 O7 N2 P1	1.36192e+06	3618.28	797120	797743	618103	449194	279605	1.52766e+06	522804	567623	838014	588821	575402	513818	550434	569268
MePC(30:3e)	MePC	M+NH4	717.554	10.1106	C39 H78 O7 N2 P1	3.72354e+06	72654.1	2.33906e+06	2.72637e+06	1.16878e+06	1.0716e+06	371419	2.9137e+06	1.0594e+06	1.60436e+06	1.53549e+06	1.40489e+06	1.86296e+06	1.18749e+06	1.71539e+06	1.612e+06
MePC(30:4e)	MePC	M+Na	720.494	11.126	C39 H72 O7 N1 P1 Na1	1.13448e+06	4112.85	738468	984881	1.08831e+06	904844	310074	2.26353e+06	633596	952584	893052	722937	1.01677e+06	632586	669170	962270
MePC(30:6e)	MePC	M+Na	716.463	10.4064	C39 H68 O7 N1 P1 Na1	4.84197e+06	7937.9	2.51446e+06	2.71741e+06	293010	308295	53683.2	1.18298e+06	130194	276499	118163	173148	725212	540130	735018	720426
MePC(31:0)	MePC	M+Na	756.551	13.2576	C40 H80 O8 N1 P1 Na1	2.02239e+07	7.45467e+06	1.8464e+07	2.68713e+07	1.54521e+07	1.29375e+07	1.30089e+07	1.69035e+07	1.0374e+07	1.15205e+07	8.47836e+06	1.04375e+07	1.95319e+07	1.65932e+07	1.67967e+07	1.81837e+07
MePC(31:0e)	MePC	M+Na	742.572	12.889	C40 H82 O7 N1 P1 Na1	6.14198e+06	116325	4.07138e+06	5.15179e+06	6.91159e+07	5.20344e+07	1.34258e+07	6.01541e+07	2.60928e+07	3.42339e+07	3.47389e+07	3.19907e+07	2.70862e+07	2.02995e+07	2.93295e+07	2.63489e+07
MePC(31:1)	MePC	M+Na	754.536	12.0631	C40 H78 O8 N1 P1 Na1	2.70155e+07	1.73469e+07	7.05937e+07	9.47958e+07	7.47672e+07	7.16572e+07	1.03015e+07	6.02121e+07	5.1579e+07	4.77653e+07	5.48237e+07	5.26299e+07	1.00959e+08	6.73308e+07	8.91337e+07	8.61967e+07
MePC(31:1e)	MePC	M+Na	740.556	12.8539	C40 H80 O7 N1 P1 Na1	808243	172046	2.06665e+06	3.20888e+07	1.31749e+07	1.07303e+07	4.49223e+06	1.15069e+07	4.49547e+06	5.09915e+06	1.16834e+07	4.06912e+07	4.12851e+06	3.86547e+06	1.10495e+07	7.70277e+06
MePC(31:2)	MePC	M+Na	752.52	9.597	C40 H76 O8 N1 P1 Na1	2.80805e+07	333068	1.03679e+07	1.47472e+07	3.43344e+06	2.70922e+06	2.17245e+06	9.03159e+06	1.62257e+06	3.80937e+06	2.11069e+06	1.96909e+06	7.70719e+06	4.48204e+06	7.36104e+06	7.58318e+06
MePC(31:2e)	MePC	M+Na	738.541	11.1547	C40 H78 O7 N1 P1 Na1	7.41015e+06	192832	4.28217e+06	6.14211e+06	1.79871e+06	1.43612e+06	898796	8.56683e+06	7.25796e+06	8.90937e+06	1.0579e+07	9.78909e+06	5.0965e+06	3.53034e+06	4.88837e+06	3.55805e+06
MePC(31:3e)	MePC	M+Na	736.525	9.488	C40 H76 O7 N1 P1 Na1	4735.35	0	84648.8	84115.2	616298	478774	804893	4.66397e+06	756685	1.77683e+06	1.09468e+06	1.24433e+06	1.10524e+06	482162	698553	833028
MePC(31:4)	MePC	M+NH4	743.533	12.967	C40 H76 O8 N2 P1	9.20846e+06	254478	8.31988e+06	8.85255e+06	458257	849405	83478.8	792928	967598	1.72681e+06	819043	427562	2.86129e+06	1.8762e+06	3.16441e+06	2.62818e+06
MePC(32:0)	MePC	M+Na	770.567	14.2785	C41 H82 O8 N1 P1 Na1	7.40878e+07	1.325e+06	5.60395e+07	6.94231e+07	3.39158e+07	2.75631e+07	6.49126e+06	5.92771e+07	3.37788e+07	3.94975e+07	2.14198e+07	2.24517e+07	2.96624e+07	3.58543e+07	3.10034e+07	3.61804e+07
MePC(32:0e)	MePC	M+Na	756.588	14.789	C41 H84 O7 N1 P1 Na1	160099	0	259157	291753	4.83648e+06	3.71054e+06	580164	4.42385e+06	2.93217e+06	4.12637e+06	2.46736e+06	2.30358e+06	2.0095e+06	2.23229e+06	1.64012e+06	1.77976e+06
MePC(32:1)	MePC	M+NH4	763.596	13.3758	C41 H84 O8 N2 P1	1.615e+08	1.53527e+07	1.45567e+08	2.21491e+08	2.01992e+08	1.83136e+08	5.47214e+07	2.2486e+08	1.50534e+08	1.78143e+08	1.40203e+08	1.13856e+08	1.78439e+08	1.36027e+08	1.16768e+08	1.61754e+08
MePC(32:2)	MePC	M+Na	766.536	12.389	C41 H78 O8 N1 P1 Na1	4.91504e+08	1.19763e+07	3.44785e+08	5.02947e+08	1.27065e+08	1.06781e+08	3.47856e+07	1.51407e+08	1.40888e+08	2.02432e+08	1.22317e+08	1.74794e+08	2.34884e+08	1.74971e+08	1.81724e+08	2.14022e+08
MePC(32:2e)	MePC	M+Na	752.556	11.7314	C41 H80 O7 N1 P1 Na1	1.61872e+06	22490.3	963396	1.04742e+06	2.61679e+06	212903	683239	6.6299e+06	131531	280104	9.13563e+06	127844	225994	204217	200488	118416
MePC(32:3)	MePC	M+Na	764.52	12.6738	C41 H76 O8 N1 P1 Na1	6.37915e+06	377443	5.70469e+06	6.51001e+06	4.87118e+06	4.49626e+06	2.38714e+06	4.64826e+06	4.15514e+06	5.49657e+06	4.75225e+06	3.94651e+06	3.93685e+06	4.97169e+06	5.16827e+06	4.93779e+06
MePC(32:3e)	MePC	M+Na	750.541	12.7918	C41 H78 O7 N1 P1 Na1	141295	15353.5	49041.5	112655	1.43117e+07	1.17677e+07	3.62561e+06	1.31265e+07	7.38061e+06	1.2108e+07	1.06428e+07	9.3301e+06	7.41562e+06	6.40993e+06	7.75506e+06	7.31541e+06
MePC(32:4e)	MePC	M+Na	748.525	12.5347	C41 H76 O7 N1 P1 Na1	6.71909e+06	205952	5.54405e+06	9.33303e+06	2.9758e+08	2.52777e+08	8.65281e+07	2.58018e+08	2.02311e+08	2.89995e+08	2.22568e+08	2.3237e+08	1.62186e+08	1.34263e+08	1.67045e+08	1.18969e+08
MePC(32:5)	MePC	M+NH4	755.533	12.0381	C41 H76 O8 N2 P1	8.98152e+06	6.13198e+06	2.26601e+07	3.40416e+07	3.19934e+07	2.73081e+07	2.55961e+07	2.37395e+07	2.25987e+07	1.89297e+07	2.69288e+07	2.31081e+07	3.32984e+07	515322	3.22012e+07	3.56757e+07
MePC(32:5e)	MePC	M+Na	746.51	14.418	C41 H74 O7 N1 P1 Na1	321983	21162.7	282447	428364	3.18541e+06	3.2906e+06	2.96826e+06	2.42636e+06	2.96375e+06	3.09399e+06	2.7845e+06	2.58569e+06	3.02927e+06	3.00006e+06	2.7762e+06	2.96727e+06
MePC(32:6e)	MePC	M+Na	744.494	11.8532	C41 H72 O7 N1 P1 Na1	8.2268e+06	449165	7.19834e+06	1.00048e+07	3.86278e+06	3.20529e+06	1.86464e+06	6.32573e+06	2.47327e+06	2.9149e+06	2.73245e+06	3.35999e+06	7.6613e+06	4.81841e+06	6.34298e+06	6.15486e+06
MePC(32:7e)	MePC	M+Na	742.478	10.5484	C41 H70 O7 N1 P1 Na1	1.34605e+07	37540.4	7.07023e+06	8.54032e+06	1.06698e+06	914182	87956.8	1.7885e+06	538031	818695	505942	723706	2.52485e+06	1.43174e+06	2.26862e+06	2.08211e+06
MePC(33:0)	MePC	M+Na	784.583	14.6122	C42 H84 O8 N1 P1 Na1	2.25087e+07	1.28318e+06	2.21727e+07	2.97853e+07	2.46892e+07	1.96344e+07	1.25351e+07	2.53273e+07	2.01077e+07	2.61062e+07	1.60634e+07	1.60977e+07	2.08701e+07	2.14239e+07	1.99399e+07	1.33765e+07
MePC(33:0e)	MePC	M+Na	770.603	15.4265	C42 H86 O7 N1 P1 Na1	1.9505e+06	21525.9	1.91865e+06	2.00814e+06	4.78113e+07	4.21894e+07	6.62225e+06	3.58446e+07	1.43985e+07	2.74001e+07	1.34146e+07	1.33037e+07	1.18742e+07	1.45478e+07	1.28427e+07	1.15515e+07
MePC(33:1)	MePC	M+Na	782.567	13.2642	C42 H82 O8 N1 P1 Na1	5.47081e+07	5.08447e+07	4.59878e+07	7.47181e+07	6.6284e+07	1.16717e+08	1.29371e+08	5.38196e+07	1.19722e+08	6.87036e+07	4.29316e+07	6.59211e+07	8.81005e+07	6.81764e+07	1.29266e+08	7.77875e+07
MePC(33:1e)	MePC	M+Na	768.588	13.7133	C42 H84 O7 N1 P1 Na1	6.8302e+07	5.03777e+06	5.35042e+07	8.57256e+07	2.41621e+07	2.05665e+07	3.61868e+06	4.84754e+07	3.02507e+07	4.18162e+07	2.97139e+07	2.96313e+07	3.2001e+07	3.24068e+07	3.82407e+07	3.60814e+07
MePC(33:2)	MePC	M+Na	780.551	12.162	C42 H80 O8 N1 P1 Na1	1.2473e+08	1.03943e+07	1.13434e+08	1.61099e+08	1.42783e+08	1.29936e+08	9.90396e+07	1.24327e+08	1.26353e+08	1.23654e+08	1.31868e+08	1.39918e+08	1.82842e+08	1.24648e+08	1.54014e+08	1.54958e+08
MePC(33:2e)	MePC	M+Na	766.572	12.5824	C42 H82 O7 N1 P1 Na1	5.24596e+06	201169	6.00304e+06	8.28177e+06	1.76305e+08	1.46656e+08	5.22877e+07	2.27667e+08	2.2934e+08	2.61383e+08	2.72596e+08	2.57419e+08	1.41933e+08	1.08341e+08	1.21139e+08	1.50785e+08
MePC(33:3)	MePC	M+Na	778.536	11.204	C42 H78 O8 N1 P1 Na1	1.64749e+07	92500.8	2.58419e+07	1.25006e+07	1.79077e+07	2.20822e+07	3.01681e+06	2.9335e+07	2.32702e+07	3.14238e+07	1.90372e+07	1.77732e+07	1.26968e+07	2.18774e+07	1.58158e+07	1.29282e+07
MePC(33:3e)	MePC	M+Na	764.556	11.2429	C42 H80 O7 N1 P1 Na1	1.52746e+07	25336	8.43158e+06	1.23852e+07	4.20888e+06	2.38742e+06	635267	7.38319e+06	3.58904e+06	3.05122e+06	5.08292e+06	5.55717e+06	6.68625e+06	4.61182e+06	6.09967e+06	5.96992e+06
MePC(33:4)	MePC	M+NH4	771.565	13.3103	C42 H80 O8 N2 P1	593598	537311	895256	3.42575e+06	1.12978e+06	1.39516e+06	2.17327e+06	1.45338e+06	1.0087e+06	1.89909e+06	1.53087e+06	1.90453e+06	2.75307e+06	2.18748e+06	2.26176e+06	2.6741e+06
MePC(33:4e)	MePC	M+Na	762.541	12.9766	C42 H78 O7 N1 P1 Na1	152045	471301	409034	583103	8.53739e+06	6.91709e+06	1.79652e+06	1.10473e+07	7.05209e+06	1.00517e+07	7.34434e+06	6.83152e+06	4.59461e+06	4.05456e+06	4.98889e+06	4.13962e+06
MePC(33:5)	MePC	M+NH4	769.549	12.409	C42 H78 O8 N2 P1	1.47711e+07	478774	1.45418e+07	2.04575e+07	3.54621e+06	2.62393e+06	1.3358e+06	5.75716e+06	3.58835e+06	4.96213e+06	2.90531e+06	5.01931e+06	7.08767e+06	5.28587e+06	7.90707e+06	6.74027e+06
MePC(33:6)	MePC	M+NH4	767.533	12.144	C42 H76 O8 N2 P1	4.80207e+06	233605	3.57937e+06	1.36642e+06	1.63007e+06	1.86547e+06	128053	1.6521e+06	1.29475e+06	1.17401e+06	1.22719e+06	1.28237e+06	3.27615e+06	2.69566e+06	3.12073e+06	2.36673e+06
MePC(33:7)	MePC	M+NH4	765.518	11.266	C42 H74 O8 N2 P1	1.53802e+06	202437	302899	1.45504e+06	6.11815e+06	2.37001e+06	594699	1.54988e+07	4.0553e+06	4.88967e+06	6.85564e+06	6.132e+06	2.97837e+06	2.21308e+06	2.75437e+06	2.90678e+06
MePC(33:9)	MePC	M+NH4	761.486	12.43	C42 H70 O8 N2 P1	246956	39633.4	258157	341336	54303.9	81075.3	132612	0	0	2.535	0	56678.2	213568	160040	139990	104641
MePC(34:0)	MePC	M+Na	798.598	15.5857	C43 H86 O8 N1 P1 Na1	3.75059e+06	25213.6	3.22318e+06	3.76561e+06	5.54896e+06	5.26018e+06	960473	9.21219e+06	3.33616e+06	5.09442e+06	2.95254e+06	2.52057e+06	2.65996e+06	3.29811e+06	3.81158e+06	8.81153e+06
MePC(34:0e)	MePC	M+Na	784.619	14.518	C43 H88 O7 N1 P1 Na1	235384	6720.11	170703	268961	1.51088e+06	1.04493e+06	199784	474868	541328	658575	559152	340457	304859	262931	423010	253894
MePC(34:1)	MePC	M+Na	796.583	14.027	C43 H84 O8 N1 P1 Na1	4.55819e+07	4.52403e+06	3.78072e+07	5.79241e+07	2.46442e+07	2.26193e+07	8.07335e+06	2.93295e+07	2.49369e+07	2.29849e+07	1.15479e+07	1.57427e+07	1.76117e+07	2.68454e+07	2.79744e+07	1.90838e+07
MePC(34:2)	MePC	M+Na	794.567	11.364	C43 H82 O8 N1 P1 Na1	5.36527e+07	527379	3.50534e+07	4.28892e+07	2.0672e+07	1.37404e+07	3.21762e+06	5.9309e+07	3.41958e+07	4.38802e+07	5.10772e+07	4.81656e+07	3.75966e+07	2.31085e+07	2.98044e+07	3.45192e+07
MePC(34:2e)	MePC	M+Na	780.588	13.2526	C43 H84 O7 N1 P1 Na1	667624	451307	563579	839133	3.32965e+06	3.1219e+06	881873	6.09882e+06	5.89178e+06	6.39143e+06	5.83532e+06	6.57656e+06	2.48961e+06	2.4455e+06	2.42284e+06	2.74426e+06
MePC(34:3)	MePC	M+Na	792.551	10.868	C43 H80 O8 N1 P1 Na1	1.00823e+07	123305	6.08912e+06	8.29847e+06	3.89901e+06	2.39872e+06	1.75139e+06	1.11898e+07	7.09079e+06	6.01035e+06	5.82027e+06	5.36811e+06	5.38573e+06	3.75047e+06	4.8141e+06	5.29668e+06
MePC(34:3e)	MePC	M+Na	778.572	11.6707	C43 H82 O7 N1 P1 Na1	881067	2303.07	522759	661096	1.5279e+06	1.37824e+06	577638	3.10578e+06	2.31969e+06	3.50147e+06	2.80098e+06	2.7698e+06	1.68722e+06	1.04543e+06	1.5787e+06	1.49025e+06
MePC(34:4)	MePC	M+Na	790.536	15.0569	C43 H78 O8 N1 P1 Na1	6.81452e+06	909699	7.50881e+06	1.0294e+07	7.53335e+06	6.84302e+06	4.0523e+06	6.13248e+06	6.4007e+06	6.87673e+06	5.32038e+06	5.3814e+06	6.67845e+06	7.08357e+06	6.53789e+06	6.01999e+06
MePC(34:4e)	MePC	M+Na	776.556	11.1737	C43 H80 O7 N1 P1 Na1	466715	1659.65	124415	845201	1.47283e+06	854386	417210	3.36122e+06	2.90466e+06	3.05102e+06	3.21615e+06	3.15518e+06	2.05988e+06	949174	1.32614e+06	1.36899e+06
MePC(34:5)	MePC	M+Na	788.52	13.8268	C43 H76 O8 N1 P1 Na1	3.39713e+06	1.76699e+06	3.57976e+06	4.85872e+06	2.24379e+06	2.31983e+06	3.16115e+06	1.11836e+06	2.99309e+06	2.79718e+06	2.53518e+06	2.39119e+06	3.05148e+06	3.75987e+06	3.43665e+06	3.2698e+06
MePC(34:5e)	MePC	M+Na	774.541	15.6827	C43 H78 O7 N1 P1 Na1	272094	178076	418693	303435	2.99573e+06	2.6598e+06	1.40676e+06	1.70757e+06	1.92292e+06	2.46266e+06	1.72199e+06	1.61688e+06	1.58983e+06	1.74218e+06	1.75535e+06	1.75808e+06
MePC(34:6e)	MePC	M+Na	772.525	13.253	C43 H76 O7 N1 P1 Na1	1.66701e+06	713589	1.66714e+06	1.9411e+06	1.8071e+06	1.54801e+06	1.56605e+06	1.56682e+06	839621	1.23158e+06	995522	981878	1.84348e+06	1.43874e+06	1.81935e+06	1.83109e+06
MePC(34:7e)	MePC	M+Na	770.51	12.0199	C43 H74 O7 N1 P1 Na1	9.43342e+06	1.68621e+06	9.54804e+06	1.49946e+07	1.03551e+07	9.69065e+06	5.07067e+06	1.21653e+06	1.05342e+07	2.77375e+06	2229996	1.99503e+06	1.37847e+07	1.07051e+07	4.55542e+06	1.32532e+07
MePC(34:8e)	MePC	M+Na	768.494	10.6595	C43 H72 O7 N1 P1 Na1	8.94061e+06	26681.6	4.73251e+06	6.44638e+06	413125	346954	55142.1	462424	109971	255729	250462	222282	1.41555e+06	894204	1.14277e+06	1.28105e+06
MePC(35:0)	MePC	M+Na	812.614	14.3801	C44 H88 O8 N1 P1 Na1	1.81692e+07	288959	1.39674e+07	1.55844e+07	4.43569e+07	3.7427e+07	6.68374e+06	6.00371e+07	2.28663e+07	2.88967e+07	1.71925e+07	1.81686e+07	1.87056e+07	2.10599e+07	1.58472e+07	1.86585e+07
MePC(35:0e)	MePC	M+Na	798.635	14.813	C44 H90 O7 N1 P1 Na1	943794	1605.7	1.01965e+06	52120.5	4.2511e+07	3.4945e+07	8.26743e+06	2.13708e+07	3.22904e+07	4.13804e+07	1.5024e+07	2.23489e+07	5.74661e+06	1.71787e+07	1.39134e+07	1.43292e+07
MePC(35:1)	MePC	M+Na	810.598	14.7052	C44 H86 O8 N1 P1 Na1	1.01796e+08	4.58106e+06	9.21349e+07	1.12737e+08	1.44431e+08	1.33392e+08	7.96011e+07	8.64557e+07	1.41716e+08	1.18578e+08	1.05099e+08	9.61925e+07	1.1303e+08	1.03805e+08	8.21625e+07	9.23079e+07
MePC(35:1e)	MePC	M+Na	796.619	14.1646	C44 H88 O7 N1 P1 Na1	5.15041e+06	11776.5	4.0466e+06	1.58729e+06	1.68579e+08	1.42065e+08	4.06764e+07	1.70121e+08	2.56186e+08	3.10472e+08	2.3142e+08	2.22432e+08	8.97765e+07	1.18501e+08	1.11493e+08	1.01693e+08
MePC(35:2)	MePC	M+Na	808.583	13.479	C44 H84 O8 N1 P1 Na1	6.10998e+07	2.67039e+07	7.40385e+07	1.1094e+08	4.00909e+07	3.78225e+07	1.91944e+07	1.02194e+08	4.38149e+07	6.59086e+07	3.3339e+07	4.03152e+07	4.91614e+07	4.2887e+07	4.43923e+07	5.05184e+07
MePC(35:2e)	MePC	M+Na	794.603	13.585	C44 H86 O7 N1 P1 Na1	3.26495e+07	754136	1.63375e+07	3.37134e+07	1.82803e+07	1.40245e+07	4.47951e+06	3.44955e+07	4.46606e+07	5.34632e+07	3.89895e+07	3.73972e+07	1.28373e+07	1.97789e+07	1.76067e+07	1.26492e+07
MePC(35:3)	MePC	M+Na	806.567	12.3247	C44 H82 O8 N1 P1 Na1	3.39325e+07	1.03234e+06	3.15044e+07	4.2935e+07	4.98603e+07	4.47593e+07	1.91492e+07	3.46624e+07	4.87726e+07	5.50417e+07	4.53282e+07	5.77333e+07	5.12766e+07	3.63653e+07	4.55135e+07	5.15427e+07
MePC(35:3e)	MePC	M+Na	792.588	14.01	C44 H84 O7 N1 P1 Na1	127782	573.328	147641	332076	3.7237e+06	2.41434e+06	1.0018e+06	2.0051e+06	4.31374e+06	2.35591e+06	3.93239e+06	2.60947e+06	2.18016e+06	1.29661e+06	2.73969e+06	2.25469e+06
MePC(35:4)	MePC	M+Na	804.551	10.196	C44 H80 O8 N1 P1 Na1	7.08771e+07	1.17398e+06	4.42927e+07	5.13759e+07	2.3144e+07	2.67798e+07	1.11597e+07	4.76067e+07	2.30486e+07	3.3462e+07	3.43231e+07	3.29659e+07	4.10353e+07	2.31815e+07	3.4164e+07	2.681e+07
MePC(35:4e)	MePC	M+Na	790.572	12.1339	C44 H82 O7 N1 P1 Na1	2.76821e+06	24963.6	1.86693e+06	2.80676e+06	1.00777e+08	8.20349e+07	3.1581e+07	1.52246e+08	7.4963e+07	9.07557e+07	9.15456e+07	8.93806e+07	5.77546e+07	3.69192e+07	5.54313e+07	5.9474e+07
MePC(36:0)	MePC	M+Na	826.63	16.635	C45 H90 O8 N1 P1 Na1	255631	0	24773.1	267756	1.29916e+06	607877	216413	1.71045e+06	963627	1.65554e+06	931971	846345	828671	813041	628042	696619
MePC(36:1)	MePC	M+Na	824.614	15.303	C45 H88 O8 N1 P1 Na1	4.10341e+06	59263.7	4.49293e+06	5.72133e+06	1.35298e+06	3.24313e+06	557629	7.3488e+06	63126.1	217742	286696	100184	1.85052e+06	2.18423e+06	1.5964e+06	1.79664e+06
MePC(36:2)	MePC	M+Na	822.598	14.9199	C45 H86 O8 N1 P1 Na1	1.21695e+07	165680	1.02742e+07	1.21039e+07	5.49292e+06	4.69163e+06	706631	5.61835e+06	5.42686e+06	8.12581e+06	4.91968e+06	3.5858e+06	4.52946e+06	5.65517e+06	4.61576e+06	4.45206e+06
MePC(36:2e)	MePC	M+NH4	803.664	15.5902	C45 H92 O7 N2 P1	2.2615e+06	119285	2.96871e+06	2.9896e+06	1.77765e+06	1.07998e+06	86999.7	349871	239222	1.27574e+06	671718	150395	624648	1.62752e+06	1.75155e+06	1.33536e+06
MePC(36:3)	MePC	M+NH4	815.627	13.563	C45 H88 O8 N2 P1	5.46991e+06	158228	6.44379e+06	7.83598e+06	9.95257e+06	8.12368e+06	2.45347e+06	1.58822e+07	1.03064e+07	9.42632e+06	8.69186e+06	7.87749e+06	8.50263e+06	7.26097e+06	3.47305e+06	8.22889e+06
MePC(36:3e)	MePC	M+Na	806.603	13.0454	C45 H86 O7 N1 P1 Na1	762545	5991.7	780623	1.22615e+06	4.02749e+06	3.681e+06	1.01558e+06	7.26066e+06	7.85786e+06	1.01766e+07	8.45508e+06	8.16777e+06	3.67749e+06	2.68714e+06	2.91843e+06	2.96393e+06
MePC(36:4)	MePC	M+Na	818.567	10.948	C45 H82 O8 N1 P1 Na1	1.23607e+07	159256	7.37388e+06	9.02648e+06	1.05713e+07	9.05327e+06	4.2067e+06	2.89656e+07	8.72162e+06	1.13737e+07	1.32687e+07	1.18311e+07	1.09475e+07	6.72184e+06	9.23389e+06	1.02433e+07
MePC(36:4e)	MePC	M+Na	804.588	15.1642	C45 H84 O7 N1 P1 Na1	1.22936e+06	0	986926	1.39217e+06	1.81406e+06	1.72105e+06	357512	972220	1.42232e+06	2.06404e+06	1.4208e+06	1.51414e+06	1.18403e+06	1.27438e+06	1.01883e+06	1.10096e+06
MePC(36:5)	MePC	M+Na	816.551	14.9417	C45 H80 O8 N1 P1 Na1	2.01395e+06	151691	2.22023e+06	2.92033e+06	1.14344e+06	734600	449234	663603	888558	1.01775e+06	763748	735745	1.02563e+06	1.25285e+06	1.16649e+06	1.32149e+06
MePC(36:6)	MePC	M+Na	814.536	14.2722	C45 H78 O8 N1 P1 Na1	2.0282e+06	66742.8	1.60369e+06	1.99425e+06	234657	176128	163228	529948	313366	326049	277567	249693	585148	509009	645895	484742
MePC(36:6e)	MePC	M+Na	800.556	14.6162	C45 H80 O7 N1 P1 Na1	2.13399e+06	11546.6	2.03703e+06	3.20671e+06	2.47788e+06	2.03673e+06	1.41144e+06	2.82509e+06	2.26991e+06	3.00985e+06	1.71639e+06	1.72522e+06	2.41831e+06	2.62129e+06	2.23446e+06	2.51178e+06
MePC(36:7e)	MePC	M+Na	798.541	13.2469	C45 H78 O7 N1 P1 Na1	5.20524e+06	4.22255e+06	3.95229e+06	6.52767e+06	8.15087e+06	6.25765e+06	1.03664e+07	4.25092e+06	1.1027e+07	6.09492e+06	8.04852e+06	9.06199e+06	1.04151e+07	6.51037e+06	6.29234e+06	8.69688e+06
MePC(36:9)	MePC	M+Na	808.489	11.432	C45 H72 O8 N1 P1 Na1	2.04683e+06	59814.3	1.4103e+06	1.79502e+06	245595	255548	63534.9	276285	204252	247570	97058.4	128264	480219	750896	561713	495377
MePC(37:0)	MePC	M+Na	840.645	14.8494	C46 H92 O8 N1 P1 Na1	3.15189e+07	1.34884e+06	7.33075e+07	9.14606e+07	9.15569e+07	8.76805e+07	1.03758e+07	5.66576e+07	4.90239e+07	8.55527e+07	4.34106e+07	1.42616e+07	4.01163e+07	4.71264e+07	1.98537e+07	1.44483e+07
MePC(37:0e)	MePC	M+Na	826.666	15.7944	C46 H94 O7 N1 P1 Na1	2.33094e+06	59752.4	2.41184e+06	2.89195e+06	5.32753e+06	4.00747e+06	619733	5.12719e+06	5.51799e+06	7.7933e+06	4.39129e+06	3.91368e+06	2.97452e+06	3.06234e+06	2.01888e+06	2.14472e+06
MePC(37:1)	MePC	M+Na	838.63	14.6307	C46 H90 O8 N1 P1 Na1	1.19187e+07	458322	1.4348e+07	1.90271e+07	9.1087e+06	7.89576e+06	4.37589e+06	1.19516e+07	1.24905e+07	1.15177e+07	7.46297e+06	4.73565e+06	9.62129e+06	1.1871e+07	8.99311e+06	2.65655e+06
MePC(37:1e)	MePC	M+Na	824.65	15.4302	C46 H92 O7 N1 P1 Na1	2.32584e+06	50486.4	1.6917e+06	1.84077e+06	1.23228e+07	1.14032e+07	1.83013e+06	1.10842e+07	1.97625e+07	2.4965e+07	1.33336e+07	1.45074e+07	6.97716e+06	8.75178e+06	7.67544e+06	6.0715e+06
MePC(37:2)	MePC	M+Na	836.614	13.5257	C46 H88 O8 N1 P1 Na1	6.87118e+06	141724	4.94598e+06	7.39071e+06	4.79039e+06	4.88513e+06	1.75799e+06	1.00746e+07	7.21625e+06	7.04063e+06	6.45542e+06	6.73491e+06	5.15277e+06	4.48007e+06	5.63525e+06	5.29679e+06
MePC(37:2e)	MePC	M+Na	822.635	15.225	C46 H90 O7 N1 P1 Na1	5.82776e+06	164995	5.95414e+06	7.00985e+06	5.24246e+06	5.32695e+06	1.01208e+06	9.07717e+06	1.02452e+07	1.36805e+07	9.1126e+06	7.51762e+06	3.79797e+06	4.65241e+06	4.99644e+06	5.69619e+06
MePC(37:3)	MePC	M+Na	834.598	12.949	C46 H86 O8 N1 P1 Na1	1.16993e+08	1.98991e+06	9.5353e+07	1.17554e+08	1.57198e+08	1.24432e+08	3.5557e+07	2.8624e+08	8.96691e+07	1.23405e+08	6.38853e+07	8.73885e+07	1.03511e+08	8.43041e+07	1.277e+08	1.04721e+08
MePC(37:3e)	MePC	M+Na	820.619	12.8238	C46 H88 O7 N1 P1 Na1	3.05477e+06	40078.1	1.74478e+06	2.38725e+06	6.69821e+06	8.2873e+06	1.27169e+06	1.12026e+07	1.18898e+07	1.38316e+07	1.49701e+07	8.00697e+06	7.78153e+06	5.94575e+06	8.27196e+06	8.59801e+06
MePC(37:4)	MePC	M+Na	832.583	12.9483	C46 H84 O8 N1 P1 Na1	1.13039e+07	22416.6	7.15253e+06	1.24599e+07	8.77627e+06	7.22544e+06	2.1182e+06	1.28948e+07	1.30152e+07	1.35442e+07	1.29739e+07	1.18103e+07	1.15354e+07	8.61921e+06	1.15479e+07	1.12642e+07
MePC(37:4e)	MePC	M+Na	818.603	13.5046	C46 H86 O7 N1 P1 Na1	852069	9358.23	885377	916793	2.83824e+07	2.23314e+07	7.30508e+06	3.70199e+07	2.58898e+07	2.95004e+07	2.21874e+07	2.44483e+07	1.57405e+07	1.37225e+07	1.55566e+07	9.7949e+06
MePC(37:5)	MePC	M+Na	830.567	11.562	C46 H82 O8 N1 P1 Na1	1.22817e+07	21534.6	7.16652e+06	8.68089e+06	9.39493e+06	3.81289e+06	1.41876e+06	8.94557e+06	6.44789e+06	1.0258e+07	9.37119e+06	7.9614e+06	8.47806e+06	2.51765e+06	7.56855e+06	4.15513e+06
MePC(37:5e)	MePC	M+Na	816.588	12.167	C46 H84 O7 N1 P1 Na1	671831	2166.71	457590	739791	2.06524e+07	1.61254e+07	6.53336e+06	2.98123e+07	1.90447e+07	2.21431e+07	2.28417e+07	2.28716e+07	1.52074e+07	9.59255e+06	1.40219e+07	1.4331e+07
MePC(37:6)	MePC	M+Na	828.551	9.669	C46 H80 O8 N1 P1 Na1	2.35845e+06	32806.8	1.4102e+06	1.54768e+06	1.03408e+06	771845	429570	1.74494e+06	755173	1.67091e+06	2.5383e+06	2.62087e+06	1.77223e+06	921810	1.50734e+06	1.30522e+06
MePC(38:0)	MePC	M+Na	854.661	15.627	C47 H94 O8 N1 P1 Na1	293945	25486.7	2.3495e+06	539939	2.06213e+06	1.68128e+06	339540	2.27158e+06	974598	1.1203e+06	689570	690484	647910	790029	781814	729781
MePC(38:1)	MePC	M+Na	852.645	14.432	C47 H92 O8 N1 P1 Na1	1.01841e+07	155588	9.05727e+06	8.95363e+06	4.75737e+06	4.29762e+06	640396	8.69884e+06	6.95026e+06	8.98973e+06	3.95232e+06	4.39553e+06	4.19568e+06	5.91455e+06	3.46584e+06	3.56354e+06
MePC(38:1e)	MePC	M+NH4	833.711	16.5096	C47 H98 O7 N2 P1	9.16267e+06	202851	7.15036e+06	7.68561e+06	41754.3	26241.7	3083.32	342390	16883.2	28697.1	55396.8	17377.8	1.77676e+06	1.91677e+06	1.38131e+06	1.38542e+06
MePC(38:2e)	MePC	M+Na	836.65	14.303	C47 H92 O7 N1 P1 Na1	38507.3	0	13755.1	50342.6	1.20713e+06	816788	189286	2.19097e+06	3.38588e+06	3.45221e+06	3.08324e+06	2.86425e+06	1.02899e+06	986919	1.1887e+06	1.11823e+06
MePC(38:3e)	MePC	M+Na	834.635	14.345	C47 H90 O7 N1 P1 Na1	392159	601.128	258180	316065	552145	620775	136681	1.45706e+06	1.03902e+06	1.61092e+06	1.23203e+06	1.01104e+06	513951	589776	431581	452606
MePC(38:4)	MePC	M+Na	846.598	14.511	C47 H86 O8 N1 P1 Na1	1.51431e+06	6094	1.52638e+06	1.75988e+06	1.64301e+06	1.37019e+06	212271	2.59856e+06	2.3823e+06	3.09489e+06	2.29795e+06	1.54093e+06	1.37649e+06	1.80512e+06	1.42114e+06	1.46945e+06
MePC(38:5)	MePC	M+NH4	839.627	15.775	C47 H88 O8 N2 P1	3.60948e+06	23165.9	4.5309e+06	5.49473e+06	1.60572e+07	1.32157e+07	1.78066e+06	1.02444e+07	3.81181e+06	4.39263e+06	2.64395e+06	2.31458e+06	4.81896e+06	5.85988e+06	4.30461e+06	5.01038e+06
MePC(38:7e)	MePC	M+Na	826.572	14.6816	C47 H82 O7 N1 P1 Na1	1.30715e+07	242746	1.82885e+07	1.49256e+07	1.83767e+07	1.83227e+07	9.56387e+06	1.12853e+07	2.04953e+07	1.73667e+07	1.10054e+07	1.40777e+07	1.57619e+07	1.68347e+07	1.26718e+07	8.96503e+06
MePC(38:8e)	MePC	M+Na	824.556	13.49	C47 H80 O7 N1 P1 Na1	9.30967e+06	2.46546e+06	9.4403e+06	1.49578e+07	1.43496e+07	1.24153e+07	4.72455e+06	1.4119e+07	6.98786e+06	6.89074e+06	6.05602e+06	6.23749e+06	9.02073e+06	7.30177e+06	6.85937e+06	8.21756e+06
MePC(39:0)	MePC	M+Na	868.677	16.197	C48 H96 O8 N1 P1 Na1	1.32401e+06	16099.5	2.05793e+06	2.36398e+06	7.14889e+06	4.46609e+06	957866	8.75582e+06	1.54328e+06	2.9651e+06	1.95632e+06	1.35782e+06	2.57815e+06	2.64812e+06	2.684e+06	1.70296e+06
MePC(39:1)	MePC	M+Na	866.661	15.045	C48 H94 O8 N1 P1 Na1	3.44493e+07	415349	3.96565e+07	5.07224e+07	2.86728e+07	9.94008e+06	1.69337e+06	2.40606e+07	3.24493e+07	4.33059e+07	2.35811e+07	2.38155e+07	1.47967e+07	2.54882e+07	1.21851e+07	1.82561e+07
MePC(39:2e)	MePC	M+Na	850.666	16.3678	C48 H94 O7 N1 P1 Na1	2.37429e+06	2561.63	361184	1.71383e+06	1.68017e+06	2.18203e+06	47321	2.29838e+06	2.36423e+06	4.15052e+06	2.2895e+06	2.85747e+06	1.69993e+06	1.43675e+06	416152	1.11515e+06
MePC(39:3)	MePC	M+Na	862.63	14.2565	C48 H90 O8 N1 P1 Na1	4.02894e+06	33994.8	2.86394e+06	3.13545e+06	4.89859e+06	4.18021e+06	1.06088e+06	9.18693e+06	1.99874e+06	2.60735e+06	1.76892e+06	1.57628e+06	2.28124e+06	2.67777e+06	2.69188e+06	2.23952e+06
MePC(39:3e)	MePC	M+Na	848.65	14.9791	C48 H92 O7 N1 P1 Na1	1.91025e+06	3348.9	4.05943e+06	5.03387e+06	1.27733e+07	1.35272e+07	1.78854e+06	1.16828e+07	2.07285e+07	2.71895e+07	9.95181e+06	8.1816e+06	1.02304e+07	7.6475e+06	7.05954e+06	7.92304e+06
MePC(39:4)	MePC	M+Na	860.614	12.0508	C48 H88 O8 N1 P1 Na1	6.01682e+06	227779	5.10632e+06	7.9138e+06	6.80081e+06	5.9351e+06	948046	1.61658e+07	1.35266e+07	1.54271e+07	1.38267e+07	9.31651e+06	8.81753e+06	6.25355e+06	6.58837e+06	9.10914e+06
MePC(39:4e)	MePC	M+Na	846.635	14.774	C48 H90 O7 N1 P1 Na1	1.24258e+06	595.24	1.11573e+06	1.31865e+06	7.54671e+06	5.92836e+06	1.02142e+06	1.03315e+07	1.39814e+07	1.71507e+07	1.19829e+07	9.75966e+06	5.22019e+06	6.39907e+06	5.19689e+06	5.33921e+06
MePC(40:2)	MePC	M+Na	878.661	14.522	C49 H94 O8 N1 P1 Na1	2.96731e+06	9405.5	2.11874e+06	2.75929e+06	352502	376726	12640	1.08913e+06	1.43383e+06	1.51327e+06	1.18046e+06	580780	752299	1.18842e+06	346362	576183
MePC(40:2e)	MePC	M+NH4	859.726	16.421	C49 H100 O7 N2 P1	1.10798e+07	147878	8.71166e+06	9.07726e+06	0.039	0	0	37153.5	7593.05	19235.4	6133.07	973.766	1.86948e+06	1.77282e+06	1.45404e+06	1.43364e+06
MePC(40:4)	MePC	M+Na	874.63	17.9333	C49 H90 O8 N1 P1 Na1	337731	0	298790	433268	2.9412e+06	2.60176e+06	608629	2.05297e+06	1.25615e+06	1.79304e+06	1.06843e+06	1.00723e+06	1.09208e+06	1.19769e+06	1.05968e+06	1.04281e+06
MePC(40:8e)	MePC	M+Na	852.588	14.5998	C49 H84 O7 N1 P1 Na1	6.64198e+06	134422	5.49454e+06	1.17957e+07	6.02539e+06	5.14806e+06	2.80057e+06	3.8993e+06	5.3119e+06	4.9732e+06	3.98661e+06	3.41015e+06	5.81263e+06	5.54685e+06	4.2161e+06	5.07976e+06
MePC(41:1)	MePC	M+Na	894.692	16.8788	C50 H98 O8 N1 P1 Na1	6.78397e+06	64566.2	6.90371e+06	7.30803e+06	1.12496e+07	1.04518e+07	1.83368e+06	1.28015e+07	3.23885e+06	4.53759e+06	2.83411e+06	2.52687e+06	4.53755e+06	5.23209e+06	3.88648e+06	3.96977e+06
MePC(41:2)	MePC	M+Na	892.677	15.098	C50 H96 O8 N1 P1 Na1	2.63769e+07	431481	2.88161e+07	3.14547e+07	1.25983e+07	1.08575e+07	1.70303e+06	2.64759e+07	2.26678e+07	2.94431e+07	1.56033e+07	1.64641e+07	1.42535e+07	1.7295e+07	1.10375e+07	1.2207e+07
MePC(41:2e)	MePC	M+Na	878.697	16.4196	C50 H98 O7 N1 P1 Na1	1.73749e+06	0	1.30619e+06	1.40758e+06	7.17912e+06	5.93232e+06	1.23832e+06	5.29388e+06	5.70874e+06	7.57996e+06	5.3343e+06	5.07696e+06	3.15025e+06	3.44926e+06	3.38864e+06	2.90831e+06
MePC(41:3)	MePC	M+Na	890.661	14.229	C50 H94 O8 N1 P1 Na1	4.42573e+07	1.2437e+06	6.17168e+07	7.41704e+07	2.54991e+07	2.14563e+07	5.17021e+06	4.3645e+07	3.38343e+07	4.24907e+07	4.34296e+06	2.75984e+07	2.84685e+07	3.35854e+07	2.93896e+07	2.8103e+07
MePC(41:3e)	MePC	M+Na	876.682	16.1791	C50 H96 O7 N1 P1 Na1	557139	0	1.49393e+06	2.02967e+06	5.37822e+06	4.44214e+06	641189	6.26954e+06	4.1898e+06	5.92344e+06	3.78384e+06	2.30957e+06	2.16844e+06	2.66097e+06	2.23518e+06	1.98584e+06
MePC(41:4)	MePC	M+Na	888.645	13.449	C50 H92 O8 N1 P1 Na1	648834	7125.42	213998	1.04822e+06	9.8927e+06	9.0196e+06	4.01565e+06	2.00511e+07	6.40303e+06	8.37386e+06	3.99945e+06	6.32763e+06	6.74088e+06	4.9565e+06	4.19423e+06	6.0807e+06
MePC(41:4e)	MePC	M+Na	874.666	14.906	C50 H94 O7 N1 P1 Na1	25817.2	0	186596	148396	2.41008e+06	1.91177e+06	149387	2.2103e+06	1.34137e+06	1.75693e+06	1.3302e+06	1.30617e+06	449758	969893	688374	837605
MePC(41:6)	MePC	M+Na	884.614	11.7894	C50 H88 O8 N1 P1 Na1	2.40848e+07	302076	1.63674e+07	1.98618e+07	3.42774e+06	1.52235e+06	317488	1.77246e+07	1.15028e+07	1.49715e+07	1.52526e+07	1.51127e+07	1.27877e+07	8.34513e+06	1.14942e+07	1.183e+07
MePC(42:8)	MePC	M+Na	894.598	9.809	C51 H86 O8 N1 P1 Na1	0	0	0	0	0	4265.33	769101	820315	201531	1.35749e+06	0	0	325776	166893	319128	301474
MePC(42:8e)	MePC	M+Na	880.619	15.818	C51 H88 O7 N1 P1 Na1	997555	0	1.20299e+06	1.37474e+06	2.69392e+06	2.23229e+06	213491	1.43294e+06	889169	1.29405e+06	507988	660997	868841	1.19466e+06	802381	1.10839e+06
MePC(43:3)	MePC	M+Na	918.692	16.5591	C52 H98 O8 N1 P1 Na1	1.80126e+06	6431.2	1.74417e+06	1.92523e+06	3.8702e+06	3.37289e+06	705230	4.4641e+06	716605	880650	613138	585819	1.38486e+06	1.47676e+06	1.2356e+06	1.37806e+06
MePC(43:4)	MePC	M+Na	916.677	14.462	C52 H96 O8 N1 P1 Na1	4.76803e+06	24841.2	4.19192e+06	4.71562e+06	2.05113e+07	1.68125e+07	2.83504e+06	2.65625e+07	1.51366e+07	2.04641e+07	1.10683e+07	8.99539e+06	8.65275e+06	1.03209e+07	8.98052e+06	8.90144e+06
MePC(43:4e)	MePC	M+Na	902.697	16.0534	C52 H98 O7 N1 P1 Na1	13235.8	0	52708.1	129793	2.67897e+06	2.43442e+06	285993	1.80486e+06	1.22922e+06	1.6543e+06	1.08144e+06	784274	548173	805420	760487	649538
MePC(43:6)	MePC	M+Na	912.645	12.9419	C52 H92 O8 N1 P1 Na1	4.25531e+06	52378.8	3.54169e+06	4.15368e+06	999517	864758	59322.3	3.68436e+06	3.49992e+06	4.34887e+06	1.72078e+06	3.39494e+06	2.63915e+06	2.09262e+06	2.68859e+06	2.57569e+06
MePC(43:7)	MePC	M+Na	910.63	12.1108	C52 H90 O8 N1 P1 Na1	268818	3662.51	152458	103985	1.21317e+06	997975	259351	4.41203e+06	1.72463e+06	2.55242e+06	2.55921e+06	2.64459e+06	2.00981e+06	901425	1.14016e+06	1.15772e+06
MePC(45:3)	MePC	M+Na	946.724	16.3673	C54 H102 O8 N1 P1 Na1	5.01382e+06	30301.9	3.81837e+06	4.17574e+06	1.29753e+07	1.20961e+07	2.02615e+06	2.02713e+07	1.04499e+07	1.47893e+07	9.99434e+06	9.13638e+06	7.43053e+06	7.74314e+06	1.01827e+06	6.46772e+06
MePC(45:5)	MePC	M+Na	942.692	15.388	C54 H98 O8 N1 P1 Na1	655603	0	761827	670059	691939	618298	78977.7	1.92624e+06	535129	868470	339933	435671	463218	573442	507557	468392
MePC(45:7)	MePC	M+Na	938.661	12.8481	C54 H94 O8 N1 P1 Na1	3.43903e+06	3237.56	2.85648e+06	3.37262e+06	2.732	0	0	799430	102117	516385	507415	390743	918224	749399	1.00479e+06	602508
MePC(47:5)	MePC	M+Na	970.724	15.6351	C56 H102 O8 N1 P1 Na1	28073	0	154077	121020	7.62764e+06	6.15876e+06	974163	6.88568e+06	3.60368e+06	4.80598e+06	2.93379e+06	2.60992e+06	2.12533e+06	2.72816e+06	2.46695e+06	2.3984e+06
MePC(49:5)	MePC	M+Na	998.755	16.6292	C58 H106 O8 N1 P1 Na1	23488.7	0	18630	19009.6	5.21213e+06	4.7445e+06	882550	4.65067e+06	2.43995e+06	3.1958e+06	2.08196e+06	1.97268e+06	1.67668e+06	1.73552e+06	1.56752e+06	1.64788e+06
MePC(49:6)	MePC	M+Na	996.739	16.262	C58 H104 O8 N1 P1 Na1	0	0	0	0	1.88669e+06	1.33882e+06	286958	4.98966e+06	3.48493e+06	4.9897e+06	2.47542e+06	2.49375e+06	1.58024e+06	1.52439e+06	1.70684e+06	314378
MePC(49:7)	MePC	M+Na	994.724	15.4034	C58 H102 O8 N1 P1 Na1	14078.4	1257.79	26689.3	10860.1	3.22786e+06	2.96734e+06	558884	4.816e+06	3.62143e+06	4.68917e+06	2.95365e+06	2.59097e+06	1.4126e+06	1.96041e+06	1.72528e+06	1.53459e+06
MePC(51:6)	MePC	M+Na	1024.77	17.1576	C60 H108 O8 N1 P1 Na1	0	0	0	0	438894	1.5282e+06	118739	1.99246e+06	947700	1136392	767207	440065	454616	574586	479269	576417
MePC(51:7)	MePC	M+Na	1022.75	16.4245	C60 H106 O8 N1 P1 Na1	0	0	0	0	2.93124e+06	2.60482e+06	442844	3.5437e+06	2.32142e+06	3.00046e+06	1.60493e+06	2.13621e+06	1.36555e+06	1.38689e+06	1.15427e+06	1.04029e+06
PC(16:0)	PC	M+H	510.319	4.065	C24 H49 O8 N1 P1	1.65576e+06	2.26756e+06	3.73239e+06	2.09451e+06	2.59207e+06	2.74831e+06	2.36683e+06	19366.7	3.24236e+06	2.07879e+06	2.34186e+06	2.20215e+06	2.04322e+06	1.02447e+06	2.18464e+06	2.6611e+06
PC(19:1)	PC	M+H	550.35	3.41983	C27 H53 O8 N1 P1	182471	2150.56	64257.9	73139.4	393943	727361	314055	629244	1.00805e+06	1.04793e+06	756801	499682	737359	851938	1.0559e+06	1.43577e+06
PC(23:5e)	PC	M+H	584.371	2.315	C31 H55 O7 N1 P1	16637.6	0	105161	16026.9	106195	147256	424956	358945	144049	1.08428e+06	28099.1	9112.32	216385	191655	228802	257825
PC(8:0e_16:0)	PC	M+H	608.465	9.90865	C32 H67 O7 N1 P1	3.07118e+06	2078.14	1.44063e+06	1.88321e+06	4.99146e+06	4.20299e+06	1.6599e+06	8.14918e+06	392382	1.06941e+06	880239	870897	2.79161e+06	1.34433e+06	2.71359e+06	2.27664e+06
PC(18:1e_6:0)	PC	M+H	606.449	8.352	C32 H65 O7 N1 P1	4.87375e+06	19750.9	2.1252e+06	2.14488e+06	2.30349e+06	1.9213e+06	878027	6.87836e+06	675592	1.4729e+06	1.16691e+06	1.2704e+06	2.4393e+06	1.38276e+06	2.52107e+06	2.56131e+06
PC(25:0e)	PC	M+H	622.481	9.04129	C33 H69 O7 N1 P1	12735.8	0	1187.67	2092.82	910883	687967	327766	3.04568e+06	562468	721470	1.02565e+06	941366	753070	421158	704408	725039
PC(26:0)	PC	M+H	650.476	8.93193	C34 H69 O8 N1 P1	4.8307e+06	59455.9	2.51506e+06	2.54841e+06	1.17307e+06	934743	419490	2.22373e+06	239222	322246	426250	397169	1.63797e+06	895952	1.54965e+06	1.54084e+06
PC(8:0e_18:0)	PC	M+H	636.496	11.468	C34 H71 O7 N1 P1	2.90231e+06	4761.43	1.86426e+06	2.2556e+06	8.76236e+06	7.61002e+06	2.29124e+06	1.05179e+07	614413	1.14353e+06	934821	956727	3.67014e+06	2.34185e+06	3.08472e+06	3.52881e+06
PC(26:2e)	PC	M+H	632.465	8.473	C34 H67 O7 N1 P1	683214	137.275	268824	319378	516554	482674	164847	2.17578e+06	233295	420860	528335	549975	633862	304195	620666	549712
PC(27:0e)	PC	M+H	650.512	10.5123	C35 H73 O7 N1 P1	101875	458.354	40756.3	76975.8	462204	386302	126940	3.13375e+06	579110	877653	942600	918004	685451	354099	640763	640124
PC(28:0)	PC	M+H	678.507	10.097	C36 H73 O8 N1 P1	2.46136e+06	2994.04	1.55466e+06	1.85684e+06	163754	143656	37592.1	394572	93256.8	145678	131096	132261	631290	127955	615942	182664
PC(28:1)	PC	M+H	676.491	9.12952	C36 H71 O8 N1 P1	1.0017e+07	110175	5.40241e+06	5.58201e+06	1.3625e+06	1.09266e+06	418305	2.1668e+06	372187	432278	675419	573462	2.69085e+06	1.27026e+06	2.54726e+06	2.58276e+06
PC(29:0)	PC	M+Na	714.504	10.8484	C37 H74 O8 N1 P1 Na1	7.08315e+06	73030.8	2.6188e+06	5.27528e+06	390892	336203	9049.85	821559	44846.7	275356	328657	265630	1.51899e+06	1.17265e+06	1.27248e+06	1.40961e+06
PC(15:0_14:0)	PC	M+Na	714.504	11.1853	C37 H74 O8 N1 P1 Na1	4.71441e+07	427654	4.70757e+07	3.47166e+07	4.58128e+06	1.89636e+07	4.92225e+06	3.43879e+07	9.35537e+06	1.32449e+07	1.21225e+07	1.19064e+07	6.84271e+06	2.00514e+07	7.35028e+06	5.60222e+06
PC(29:0e)	PC	M+H	678.543	11.9938	C37 H77 O7 N1 P1	0	0	0	147762	1.32152e+06	365155	624925	3.00651e+06	811948	1.06277e+06	1.54574e+06	1.08913e+06	1.0533e+06	616021	933775	1.11724e+06
PC(29:1)	PC	M+H	690.507	9.90939	C37 H73 O8 N1 P1	5.62763e+06	58672.1	3.02317e+06	3.4488e+06	803210	703329	222752	1.84177e+06	310847	525907	992529	971053	1.75708e+06	897119	1.89994e+06	2.61271e+06
PC(16:1_13:0)	PC	M+H	690.507	12.3519	C37 H73 O8 N1 P1	9.63855e+07	2.64012e+06	7.0132e+07	1.04175e+08	2.99611e+07	2.54069e+07	7.53714e+06	3.05631e+07	1.42397e+07	2.06143e+07	1.18022e+07	1.57047e+07	4.11755e+07	3.12552e+07	37490701	3.62077e+07
PC(29:1e)	PC	M+H	676.528	10.623	C37 H75 O7 N1 P1	2.40405e+07	291002	15266.7	1.19089e+07	1.1103e+07	185727	40472.5	561564	184484	1.94049e+07	254131	1.23097e+07	1.37218e+07	91933.8	68816.2	120310
PC(29:2)	PC	M+H	688.491	11.024	C37 H71 O8 N1 P1	2.39155e+07	356576	1.52763e+07	1.64385e+07	3.68385e+06	3.07975e+06	873154	3.29986e+06	934956	1.42751e+06	1.30563e+06	1.11451e+06	5.57798e+06	4.37588e+06	4.93165e+06	5.18937e+06
PC(16:0_14:0)	PC	M+Na	728.52	11.8753	C38 H76 O8 N1 P1 Na1	7.03459e+07	5.61514e+06	5.82293e+07	7.61036e+07	3.19509e+07	2.62924e+07	1.74095e+07	4.86443e+07	2.10351e+07	2.35e+07	2.25276e+07	2.73945e+07	5.9657e+07	3.96372e+07	5.45646e+07	4.78311e+07
PC(30:0)	PC	M+H	706.538	11.8753	C38 H77 O8 N1 P1	1.91251e+09	8.07968e+07	1.52886e+09	2.11805e+09	5.92818e+08	4.90773e+08	2.1495e+08	1.47056e+09	3.43811e+08	4.52407e+08	4.33862e+08	4.75425e+08	1.2026e+09	6.93628e+08	9.56134e+08	8.38465e+08
PC(17:0_13:0)	PC	M+H	706.538	14.026	C38 H77 O8 N1 P1	1.22973e+07	202030	7.32112e+06	1.16998e+07	706501	489826	122657	1.97872e+06	527993	837611	110282	461529	2.40089e+06	2.63127e+06	2.60951e+06	2.13498e+06
PC(30:1)	PC	M+H	704.522	11.0839	C38 H75 O8 N1 P1	1.39871e+07	371070	7.56329e+06	1.05032e+07	7.21895e+06	5.36996e+06	2.3949e+06	1.88794e+07	4.81826e+06	6.65948e+06	7.34251e+06	5.64221e+06	8.79033e+06	3.86039e+06	5.30956e+06	6.66878e+06
PC(16:0_14:1)	PC	M+H	704.522	13.064	C38 H75 O8 N1 P1	2.27738e+07	437429	1.45647e+07	2.17195e+07	1.05599e+07	8.56452e+06	2.8017e+06	1.49226e+07	6.47489e+06	1.06332e+07	4.70445e+06	6.47258e+06	1.15909e+07	8.85839e+06	9.46577e+06	7.25303e+06
PC(30:1e)	PC	M+H	690.543	11.1769	C38 H77 O7 N1 P1	4.31926e+07	470296	2.64298e+07	3.4055e+07	3.25278e+07	2.7874e+07	9.26359e+06	4.50756e+07	2.00613e+07	2.73474e+07	2.81344e+07	2.69027e+07	3.24807e+07	2.20492e+07	2.67001e+07	2.89355e+07
PC(14:1e_16:0)	PC	M+H	690.543	14.9061	C38 H77 O7 N1 P1	624691	0	279518	368447	4.79495e+06	3.65205e+06	771075	9.04788e+06	2.59394e+06	4.33938e+06	706831	2.23006e+06	2.09605e+06	2.57405e+06	2.09072e+06	1.21503e+06
PC(30:2)	PC	M+H	702.507	10.0707	C38 H73 O8 N1 P1	4.99311e+06	51788.6	3.29247e+06	5.83937e+06	754717	538741	699627	2.76812e+06	1.85456e+06	1.871e+06	2.47209e+06	2.50463e+06	5.42686e+06	5.20888e+06	8.32437e+06	7.92563e+06
PC(30:2e)	PC	M+H	688.528	10.193	C38 H75 O7 N1 P1	8765.65	1654.01	1726.14	16467.8	204479	172026	90278.2	1.73259e+06	276386	351815	370243	425862	370420	190489	331609	315162
PC(30:3)	PC	M+H	700.491	9.861	C38 H71 O8 N1 P1	890384	1.09666e+06	804136	269669	932436	74348.9	711589	1.72173e+06	651616	709510	698996	265482	772148	582734	748915	748088
PC(30:4e)	PC	M+H	684.496	9.057	C38 H71 O7 N1 P1	3693.48	0	4406.1	0	291009	212038	87439.4	1.02426e+06	325601	408501	565177	538577	293357	174769	292203	301482
PC(31:0)	PC	M+H	720.554	12.6103	C39 H79 O8 N1 P1	4.34296e+08	1.18631e+07	3.50498e+08	5.22892e+08	7.24133e+07	5.99079e+07	2.2333e+07	8.63832e+07	7.1088e+07	1.01151e+08	8.99318e+07	8.47923e+07	1.6707e+08	1.38508e+08	1.5554e+08	1.9414e+08
PC(31:0e)	PC	M+H	706.575	13.472	C39 H81 O7 N1 P1	3.52987e+06	126442	3.46388e+06	4.67565e+06	1.67468e+07	1.3662e+07	5.60955e+06	2.20872e+07	1.18802e+07	1.64852e+07	1.05019e+07	1.25182e+07	1.14964e+07	9.0441e+06	5.97694e+06	1.10859e+07
PC(31:1)	PC	M+Na	740.52	10.9821	C39 H76 O8 N1 P1 Na1	9.90919e+06	24038.4	1.70977e+06	7.44143e+06	1.19421e+06	965105	41648.9	446946	654218	706168	621246	806705	1.98025e+06	1.60343e+06	1.73485e+06	1.75208e+06
PC(31:1e)	PC	M+H	704.559	13.2604	C39 H79 O7 N1 P1	4.73765e+06	143761	3.98721e+06	5.92994e+06	4.41514e+06	2.87229e+06	1.09173e+06	1.02302e+07	1.88188e+06	2.84577e+06	2.13235e+06	2.15469e+06	3.91388e+06	2.76524e+06	3.34713e+06	3.28647e+06
PC(31:2)	PC	M+H	716.522	10.0258	C39 H75 O8 N1 P1	83083.3	1501.76	38617.9	120133	97457.9	59190.2	15961.8	59591.1	98061.3	207725	105918	235505	2.17419e+06	1.21084e+06	2.21692e+06	1.97133e+06
PC(31:3)	PC	M+H	714.507	11.2008	C39 H73 O8 N1 P1	4.58584e+07	432870	4.70757e+07	3.47166e+07	4.58128e+06	1.91064e+07	4.96237e+06	3.46443e+07	9.42816e+06	1.33648e+07	1.22218e+07	1.19848e+07	6.84271e+06	2.01489e+07	7.35028e+06	5.60222e+06
PC(16:0_16:0)	PC	M+Na	756.551	13.2865	C40 H80 O8 N1 P1 Na1	2.02255e+07	7.45505e+06	1.84642e+07	2.64594e+07	1.54523e+07	1.2938e+07	1.30036e+07	1.69068e+07	1.03693e+07	1.14807e+07	8.47847e+06	1.0438e+07	1.95325e+07	1.65778e+07	1.67954e+07	1.8183e+07
PC(32:0e)	PC	M+Na	742.572	14.1395	C40 H82 O7 N1 P1 Na1	9.29605e+06	83513.5	6.67709e+06	8.3359e+06	6.97346e+07	5.91504e+07	2.33684e+07	4.45298e+07	2.15756e+07	2.78031e+07	1.87425e+07	1.95207e+07	2.48544e+07	2.98527e+07	2.72195e+07	2.42038e+07
PC(16:0_16:1)	PC	M+Na	754.536	11.9958	C40 H78 O8 N1 P1 Na1	8.5189e+07	1.83694e+07	8.16241e+07	3.26648e+07	7.83819e+07	7.18947e+07	2.84771e+07	1.2768e+07	5.37478e+07	4.29808e+07	6.48009e+07	3.76291e+07	9.98534e+07	2.54543e+07	3.66589e+07	2.59959e+07
PC(17:1_15:0)	PC	M+Na	754.536	12.527	C40 H78 O8 N1 P1 Na1	3.06902e+06	1882.64	2.31509e+06	3.56944e+06	3.99414e+06	2.55668e+06	1.47071e+06	1.69098e+06	2.47604e+06	1.77937e+06	1.43706e+06	2.55984e+06	2.33394e+06	2.56071e+06	1.81058e+06	3.79209e+06
PC(18:0_14:1)	PC	M+H	732.554	16.4666	C40 H79 O8 N1 P1	1.10534e+06	134753	576890	995108	5.72739e+06	731151	164984	14653.8	539942	397267	169732	237808	372839	507378	332130	293120
PC(16:1e_16:0)	PC	M+H	718.575	13.958	C40 H81 O7 N1 P1	1.77783e+08	3.4179e+06	1.22253e+08	1.66978e+08	2.58914e+08	2.03703e+08	5.94531e+07	3.14358e+08	6.77444e+07	9.41839e+07	6.02805e+07	4.89088e+07	1.35034e+08	1.14669e+08	1.22909e+08	1.11313e+08
PC(16:1_16:1)	PC	M+Na	752.52	11.184	C40 H76 O8 N1 P1 Na1	6.75106e+06	17486.6	9.05304e+06	4.77674e+06	7.18444e+06	7.57327e+06	941334	5.20846e+06	4.92862e+06	6.28072e+06	2.07741e+06	3.09632e+06	3.10158e+06	6.20053e+06	4.14621e+06	3.76782e+06
PC(32:2)	PC	M+H	730.538	11.184	C40 H77 O8 N1 P1	6.52789e+07	917416	2.57325e+07	5.12235e+07	2.74987e+07	2.17296e+07	1.09654e+07	5.47337e+07	4.29158e+07	4.54692e+07	6.15749e+07	5.81409e+07	4.74302e+07	3.46168e+07	4.39222e+07	4.98675e+07
PC(18:1_14:1)	PC	M+H	730.538	13.1113	C40 H77 O8 N1 P1	7.19562e+07	1.72253e+06	4.58256e+07	7.1583e+07	3.31455e+07	2.95086e+07	9.09066e+06	6.35922e+07	1.67618e+07	2.57645e+07	1.71384e+07	1.65438e+07	3.35021e+07	2.82799e+07	2.76992e+07	2.66756e+07
PC(32:2e)	PC	M+H	716.559	11.4856	C40 H79 O7 N1 P1	1.2095e+06	2260	671364	823649	817909	580979	255013	775355	571699	651893	800090	861174	862792	359517	545125	80362.7
PC(16:2e_16:0)	PC	M+H	716.559	13.174	C40 H79 O7 N1 P1	47553.8	0	74385	90968.2	1.74939e+06	812894	207467	2.72649e+06	169561	35923.9	205772	162596	482703	187565	129680	161763
PC(14:1e_18:1)	PC	M+H	716.559	14.8118	C40 H79 O7 N1 P1	1.15258e+06	3600.37	867136	1.33133e+06	1.4088e+07	1.17669e+07	2.33402e+06	1.06182e+07	4.8544e+06	8.21846e+06	4.98864e+06	3.97075e+06	3.8813e+06	5.0107e+06	2.87775e+06	4.25357e+06
PC(32:3)	PC	M+H	728.522	9.80278	C40 H75 O8 N1 P1	5.01886e+06	69913	2.58738e+06	2.84062e+06	1.55628e+06	1.27908e+06	579415	6.684e+06	2.90793e+06	3.63221e+06	4.41939e+06	4.85048e+06	3.45677e+06	1.75796e+06	3.10608e+06	2.8464e+06
PC(32:3e)	PC	M+H	714.543	10.558	C40 H77 O7 N1 P1	100472	74539.5	30455	29151.3	389995	329467	203133	1.13734e+06	388209	624036	552876	547425	329936	150091	179298	301822
PC(32:4e)	PC	M+H	712.528	9.91665	C40 H75 O7 N1 P1	298.791	0	66423.8	53536.5	682605	536625	195650	1.07946e+07	2.55339e+06	3.31843e+06	4.22078e+06	4.04046e+06	2.37556e+06	1.18926e+06	2.2064e+06	2.02944e+06
PC(32:5e)	PC	M+H	710.512	8.949	C40 H73 O7 N1 P1	0	0	801.292	0	82811.7	63369.4	31961.8	961008	90621.7	167162	189814	144416	146838	76628.9	138429	132692
PC(12:1e_20:4)	PC	M+H	710.512	12.28	C40 H73 O7 N1 P1	1.41636e+06	16082.9	1.0373e+06	1.43037e+06	1.3886e+06	1.14528e+06	172751	2.21011e+06	1.27206e+06	1.83104e+06	1.39995e+06	1.17435e+06	1.21297e+06	1.04508e+06	1.09455e+06	1.41023e+06
PC(32:6e)	PC	M+H	708.496	8.402	C40 H71 O7 N1 P1	3760.7	14575.5	2334.41	26479	860640	855242	556032	2.20292e+06	402971	698547	746276	853737	628910	298035	624283	501567
PC(33:0)	PC	M+H	748.585	13.9774	C41 H83 O8 N1 P1	1.1679e+08	2.49481e+06	8.27153e+07	1.12103e+08	5.4522e+07	4.49789e+07	1.31038e+07	1.294e+08	4.57248e+07	6.72361e+07	3.29097e+07	4.1342e+07	3.58216e+07	4.61752e+07	5.78876e+07	4.89243e+07
PC(33:1)	PC	M+H	746.569	14.652	C41 H81 O8 N1 P1	58672.3	9047.44	45350	95721	30426	26975.5	15338.8	9903.67	37658.6	21159.1	12933.6	11835.3	0	32301.5	4544.24	8744.13
PC(15:0_18:1)	PC	M+H	746.569	15.0354	C41 H81 O8 N1 P1	5.96316e+08	1.67672e+07	5.71398e+08	7.86218e+08	6.53986e+08	5.45055e+08	1.23878e+08	7.10505e+08	3.58102e+08	5.49333e+08	2.86172e+08	2.84799e+08	3.67005e+08	4.16941e+08	3.78334e+08	3.28283e+08
PC(33:1e)	PC	M+H	732.59	13.4833	C41 H83 O7 N1 P1	2.85987e+07	2.23709e+06	2.66611e+07	3.95587e+07	9.91721e+07	8.44716e+07	3.06104e+07	1.04297e+08	9.02976e+07	1.04593e+08	7.62903e+07	8.42097e+07	7.05295e+07	5.03509e+07	6.08726e+07	3.86254e+07
PC(33:2e)	PC	M+H	730.575	12.4081	C41 H81 O7 N1 P1	1.57681e+06	0.225	1.05881e+06	168995	4.56317e+06	3.00362e+06	696509	3.15167e+06	4.22423e+06	4.84169e+06	3.48674e+06	4.73835e+06	1.91543e+06	2.72255e+06	3.38423e+06	849240
PC(33:3)	PC	M+H	742.538	12.6781	C41 H77 O8 N1 P1	1.38004e+08	5.61059e+06	1.00532e+08	1.38223e+08	8.71725e+07	7.12719e+07	2.61029e+07	1.29222e+08	6.65756e+07	9.40374e+07	7.1817e+07	6.39304e+07	4.8491e+07	7.57714e+07	9.26327e+07	7.74192e+07
PC(33:4)	PC	M+H	740.522	11.5849	C41 H75 O8 N1 P1	5.75964e+06	28764.4	1.6224e+06	2.49287e+06	5.85526e+06	2.06476e+06	1.03963e+06	7.03124e+06	2.78877e+06	4.98593e+06	3.81542e+06	3.48969e+06	3.20306e+06	3.0945e+06	1.26113e+06	687211
PC(33:5)	PC	M+H	738.507	11.0287	C41 H73 O8 N1 P1	3.28716e+07	344449	1.92185e+07	2.32941e+07	8.05077e+06	7.12242e+06	1.92476e+06	1.3538e+07	5.13951e+06	8.10436e+06	6.60736e+06	5.97948e+06	9.86429e+06	8.1436e+06	8.78037e+06	9.06483e+06
PC(34:0)	PC	M+Na	784.583	14.1111	C42 H84 O8 N1 P1 Na1	9.99729e+06	116381	7.8651e+06	8.77101e+06	8.32476e+06	6.88377e+06	1.71304e+06	5.55217e+06	6.65496e+06	8.08756e+06	6.37272e+06	6.17819e+06	92345.9	5.46257e+06	4.5547e+06	4.24274e+06
PC(18:0_16:0)	PC	M+Na	784.583	14.6229	C42 H84 O8 N1 P1 Na1	2.18892e+07	1.27964e+06	2.21181e+07	3.05802e+07	2.37314e+07	1.99745e+07	1.24083e+07	2.86774e+07	1.99929e+07	2.65782e+07	1.60945e+07	1.61256e+07	2.05574e+07	2.28985e+07	2.16467e+07	1.33061e+07
PC(34:0e)	PC	M+Na	770.603	15.4314	C42 H86 O7 N1 P1 Na1	1.9505e+06	21525.9	1.91865e+06	2.00814e+06	4.78113e+07	4.21894e+07	6.62225e+06	3.58446e+07	1.44059e+07	2.74001e+07	1.34146e+07	1.33037e+07	1.18742e+07	1.45478e+07	1.28427e+07	1.15515e+07
PC(16:0_18:1)	PC	M+H	760.585	13.3731	C42 H83 O8 N1 P1	6.96913e+09	6.9882e+08	6.4216e+09	8.9371e+09	8.9201e+09	8.15618e+09	2.38571e+09	1.00133e+10	6.87603e+09	7.43683e+09	6.24613e+09	5.06963e+09	6.16271e+09	6.16066e+09	5.11249e+09	7.00555e+09
PC(18:0_16:1)	PC	M+Na	782.567	13.647	C42 H82 O8 N1 P1 Na1	924402	362340	1.78274e+06	3.50853e+06	1.29069e+07	9.83069e+06	5.47292e+06	1.23675e+07	9.51179e+06	8.00964e+06	1.57086e+07	4.98095e+06	2.0619e+06	6.53493e+06	6.79361e+06	4.01671e+06
PC(34:1)	PC	M+H	760.585	13.898	C42 H83 O8 N1 P1	6.20536e+07	698694	1.24111e+07	1.8967e+07	3.22626e+07	1.61515e+07	7.82519e+06	3.92645e+07	1.17397e+07	2.87566e+07	1.32505e+07	6.42229e+07	2.02427e+07	1.56492e+07	2.69037e+07	7.05165e+07
PC(12:0_22:1)	PC	M+H	760.585	16.3804	C42 H83 O8 N1 P1	1.85978e+06	482063	8.29232e+06	1.82861e+06	1.33024e+07	1.83581e+07	2.15171e+06	1.80777e+06	6.44629e+06	2.23043e+07	3.27033e+06	4.75244e+06	1.83218e+06	3.36974e+06	1.20092e+06	3.34864e+06
PC(20:0_14:1)	PC	M+H	760.585	18.659	C42 H83 O8 N1 P1	276276	67587.1	2.02658e+06	37686.8	213245	4.24946e+06	68741.3	928120	755970	2.34731e+06	526493	374403	84378.9	1.9098e+06	389982	906178
PC(28:1_6:0)	PC	M+H	760.585	26.0384	C42 H83 O8 N1 P1	1.47732e+06	51802.8	156551	381011	498284	82399.5	33545.3	397263	129429	540991	401327	176728	60671.5	156921	53300.5	231009
PC(16:1e_18:0)	PC	M+Na	768.588	14.1889	C42 H84 O7 N1 P1 Na1	9.7453e+06	3.23238e+06	6.907e+06	1.30304e+07	1.21147e+08	1.03652e+08	3.24888e+07	2.84752e+07	1.30788e+08	1.22176e+08	9.81334e+07	1.07888e+08	6.37791e+07	7.63957e+07	7.25964e+07	6.20121e+07
PC(16:0_18:2)	PC	M+Na	780.551	12.5508	C42 H80 O8 N1 P1 Na1	1.84292e+07	663481	1.36145e+07	1.96679e+07	3.97205e+07	3.36036e+07	2.38712e+07	3.20627e+07	3.39093e+07	3.08671e+07	3.57061e+07	4.21662e+07	3.49458e+07	2.63443e+07	3.3292e+07	3.06774e+07
PC(16:1_18:1)	PC	M+H	758.569	14.3353	C42 H81 O8 N1 P1	5.643e+07	1.24801e+06	4.07106e+07	4.92181e+07	1.75981e+07	1.5726e+07	2.50871e+06	2.52984e+07	3.54798e+06	1.33976e+07	6.8437e+06	8.63974e+06	2.78219e+06	1.8446e+07	1.40271e+07	1.23773e+07
PC(12:0_22:2)	PC	M+H	758.569	15.843	C42 H81 O8 N1 P1	314111	6506.51	374631	347128	126175	302515	41333.6	403813	787082	113970	98135.6	13601.6	41022.7	86318.9	159640	76581.5
PC(20:1_14:1)	PC	M+H	758.569	16.47	C42 H81 O8 N1 P1	380085	10428.5	411978	421526	1.71544e+06	88648.2	17114.4	64623.5	289292	441286	35510.3	71678.8	134749	637707	76096.9	48497.5
PC(34:2e)	PC	M+H	744.59	12.8703	C42 H83 O7 N1 P1	1.61548e+07	266633	1.2999e+07	1.58672e+07	4.00848e+07	3.34278e+07	6.7894e+06	2.88915e+07	3.04978e+07	3.57127e+07	2.98258e+07	3.02425e+07	2.29475e+07	1.7095e+07	2.96102e+07	2.73135e+07
PC(16:1e_18:1)	PC	M+H	744.59	13.407	C42 H83 O7 N1 P1	606771	12880.8	393591	467269	177937	1.17231e+06	1.08333e+06	1.81765e+06	2.03266e+06	1.57753e+06	371021	1.56646e+06	1.65615e+06	156597	1.95469e+06	125944
PC(14:1e_20:1)	PC	M+H	744.59	16.1739	C42 H83 O7 N1 P1	218667	0	255826	267158	6.71988e+06	3.8846e+06	1.16069e+06	6.71087e+06	3.18005e+06	5.30344e+06	2.98962e+06	2.75989e+06	2.78626e+06	2.86775e+06	1.63991e+06	2.24384e+06
PC(16:1_18:2)	PC	M+Na	778.536	11.2047	C42 H78 O8 N1 P1 Na1	1.64749e+07	92500.8	2.58419e+07	1.25006e+07	1.79077e+07	2.20822e+07	3.01681e+06	2.9335e+07	2.32702e+07	3.14238e+07	1.90372e+07	1.77732e+07	1.26968e+07	2.18774e+07	1.58158e+07	1.29282e+07
PC(34:3)	PC	M+H	756.554	11.2047	C42 H79 O8 N1 P1	2.19437e+08	1.5561e+06	1.38236e+08	1.70677e+08	1.36684e+08	1.20338e+08	4.01578e+07	1.75335e+08	1.57504e+08	1.95835e+08	2.1952e+08	2.09105e+08	1.63656e+08	1.16564e+08	1.47695e+08	1.55262e+08
PC(16:2e_18:1)	PC	M+H	742.575	12.0989	C42 H81 O7 N1 P1	43239.6	1321.42	48154.2	52857.9	3.0338e+06	2.35646e+06	908380	2.7764e+06	762515	2.37325e+06	3.03933e+06	2.81076e+06	968585	728792	1.19754e+06	1.15459e+06
PC(34:3e)	PC	M+Na	764.556	12.883	C42 H80 O7 N1 P1 Na1	415744	2658.09	248876	241945	6.67489e+06	5.29953e+06	1.29549e+06	5.24683e+06	3.32297e+06	3.36553e+06	3.22608e+06	3.15673e+06	3.07747e+06	2.10668e+06	3.34254e+06	3.06483e+06
PC(18:3e_16:0)	PC	M+H	742.575	14.1379	C42 H81 O7 N1 P1	9.29605e+06	83513.5	6.67709e+06	8.3359e+06	6.97346e+07	5.91504e+07	2.33684e+07	4.45298e+07	2.15756e+07	2.78031e+07	1.87425e+07	1.95207e+07	2.48544e+07	2.98527e+07	2.72195e+07	2.42038e+07
PC(34:4)	PC	M+H	754.538	9.9302	C42 H77 O8 N1 P1	4.94835e+06	9215.88	2.42881e+06	3.47237e+06	1.70915e+06	1.52909e+06	1.05815e+06	5.28954e+06	2.5633e+06	3.35549e+06	4.66494e+06	4.26374e+06	3.3331e+06	1.84592e+06	3.47322e+06	2.78266e+06
PC(34:4e)	PC	M+H	740.559	11.388	C42 H79 O7 N1 P1	1.56361e+06	2944.04	1.81639e+06	1.51724e+06	2.63317e+06	2.40884e+06	898171	7.18584e+06	7.0922e+06	8.81028e+06	1.00683e+07	9.94416e+06	3.66335e+06	2.80185e+06	2.71715e+06	3.27106e+06
PC(34:5)	PC	M+H	752.522	10.6663	C42 H75 O8 N1 P1	6.4289e+07	637695	3.87576e+07	4.89997e+07	4.89811e+06	4.14291e+06	872324	4.58649e+06	2.05154e+06	2.73187e+06	2.78937e+06	2.54046e+06	1.45918e+07	1.01584e+07	1.28667e+07	1.27183e+07
PC(34:5e)	PC	M+H	738.543	10.9352	C42 H77 O7 N1 P1	4.30117e+06	93640.8	2.47821e+06	2.93595e+06	567522	501070	377037	1.50353e+06	1.1695e+06	1.5471e+06	2.10275e+06	1.6872e+06	491859	379401	589529	525850
PC(14:1e_20:4)	PC	M+H	738.543	13.552	C42 H77 O7 N1 P1	1.55631e+06	56112.1	883074	1.64217e+06	1.94846e+07	1.61663e+07	4.82615e+06	2.56682e+07	1.51755e+07	2.12308e+07	1.44729e+07	1.28143e+07	1.11538e+07	9.6885e+06	1.02376e+07	1.05199e+07
PC(34:6e)	PC	M+H	736.528	9.51832	C42 H75 O7 N1 P1	1105.68	0	600.673	1003.91	243059	195586	558563	3.01324e+06	693501	1.59177e+06	1.09871e+06	1.02635e+06	735069	400849	676617	693838
PC(14:1e_20:5)	PC	M+H	736.528	12.711	C42 H75 O7 N1 P1	265058	12656.6	145131	246234	1.91746e+06	1.39696e+06	468610	1.79467e+06	508015	784484	695225	220719	465185	370025	652280	502566
PC(12:1e_22:6)	PC	M+H	734.512	11.8238	C42 H73 O7 N1 P1	798477	22532.5	468247	753899	1.11738e+06	1.13179e+06	309708	2.11628e+06	1.12421e+06	1.76879e+06	1.23829e+06	1.42625e+06	928056	688392	1.13823e+06	922026
PC(35:0)	PC	M+H	776.616	15.2647	C43 H87 O8 N1 P1	1.48268e+07	335247	1.57642e+07	1.95369e+07	1.14585e+07	6.22009e+06	1.15099e+06	2.81065e+07	5.20808e+06	9.61062e+06	5.43981e+06	5.20386e+06	5.45257e+06	8.43982e+06	5.95136e+06	7.42949e+06
PC(35:0e)	PC	M+H	762.637	16.0175	C43 H89 O7 N1 P1	1.87476e+06	2375.79	1.96449e+06	2.47109e+06	5.22776e+06	3.08419e+06	632396	4.44018e+06	2.76434e+06	4.65108e+06	1.97093e+06	2.20705e+06	2.32431e+06	2.29852e+06	2.32579e+06	1.82971e+06
PC(35:1e)	PC	M+H	760.621	14.7687	C43 H87 O7 N1 P1	3.21067e+07	247213	2.21536e+07	2.85222e+07	7.28282e+07	5.35245e+07	1.1141e+07	4.74639e+07	4.86019e+07	6.39045e+07	5.31663e+07	3.86795e+07	1.16682e+07	3.70178e+07	2.08975e+07	2.84919e+07
PC(35:2)	PC	M+H	772.585	12.7476	C43 H83 O8 N1 P1	1.07121e+09	2.1444e+07	6.31272e+08	1.02503e+09	6.13883e+08	4.99873e+08	1.85842e+08	3.47946e+08	5.129e+08	6.07158e+08	3.02261e+08	2.84536e+08	3.55431e+08	5.0806e+08	6.20382e+08	2.98616e+08
PC(35:2e)	PC	M+H	758.606	14.4036	C43 H85 O7 N1 P1	4.94254e+06	97095	4.44794e+06	5.91438e+06	2.02775e+07	1.65973e+07	3.36013e+06	1.39053e+07	1.19217e+07	1.64009e+07	1.1436e+07	1.02074e+07	2.3682e+06	5.55313e+06	4.3849e+06	5.06034e+06
PC(35:3)	PC	M+H	770.569	11.6368	C43 H81 O8 N1 P1	3.34297e+07	420662	2.03237e+07	2.56067e+07	5.13701e+07	4.39268e+07	1.30326e+07	1.29036e+08	5.9004e+07	8.12293e+07	8.94501e+07	8.4902e+07	5.30919e+07	3.46751e+07	4.2936e+07	4.96306e+07
PC(17:1_18:2)	PC	M+H	770.569	12.378	C43 H81 O8 N1 P1	6.9788e+06	337323	5.08138e+06	6.85202e+06	5.20041e+06	2.41227e+06	3.42274e+06	9.01551e+06	2.16945e+06	1.03295e+06	3.24175e+06	2.71022e+06	4.82624e+06	3.36481e+06	5.57227e+06	5.37072e+06
PC(35:3e)	PC	M+H	756.59	14.2565	C43 H83 O7 N1 P1	441206	2548.28	536466	519343	2.16419e+06	1.98118e+06	200983	2.67623e+06	2.41626e+06	2.85325e+06	2.20824e+06	1.92251e+06	742985	1.3218e+06	1.26121e+06	1.1061e+06
PC(15:0_20:4)	PC	M+Na	790.536	11.2813	C43 H78 O8 N1 P1 Na1	4.44484e+06	1040.73	7.35388e+06	3.75635e+06	2.7948e+06	2.58075e+06	219281	6.0988e+06	3.81516e+06	4.3979e+06	3.30099e+06	3.61603e+06	3.3226e+06	4.34885e+06	3.58236e+06	1.4403e+06
PC(35:4)	PC	M+H	768.554	12.6937	C43 H79 O8 N1 P1	5.58846e+07	4.65238e+06	3.76722e+07	5.11564e+07	3.83367e+07	2.6877e+07	2.06801e+07	3.7636e+07	2.3789e+07	3.6804e+07	3.96734e+07	3.99089e+07	1.63748e+07	3.50925e+07	5.06068e+07	1.91554e+07
PC(22:4_13:0)	PC	M+H	768.554	13.338	C43 H79 O8 N1 P1	4.50445e+06	321453	1.94392e+06	2.48022e+06	498455	235614	86751.3	819510	969323	1.49067e+06	1.66094e+06	910989	2.47375e+06	1.06934e+06	1.79028e+06	1.1637e+06
PC(35:5)	PC	M+H	766.538	11.3863	C43 H77 O8 N1 P1	3.38364e+07	387006	2.59418e+07	3.00126e+07	1.12451e+07	1.0681e+07	1.21148e+06	1.76356e+07	6.89063e+06	8.92414e+06	7.94624e+06	8.65692e+06	6.76927e+06	1.12994e+07	6.44554e+06	1.24076e+07
PC(35:6)	PC	M+H	764.522	11.3392	C43 H75 O8 N1 P1	1.28467e+08	2.13718e+06	7.99114e+07	9.45249e+07	2.54464e+07	2.1109e+07	6.31461e+06	5.2209e+07	1.4964e+07	2.20132e+07	2.07464e+07	1.99562e+07	4.15796e+07	3.0399e+07	3.65916e+07	3.95697e+07
PC(36:0)	PC	M+H	790.632	15.8552	C44 H89 O8 N1 P1	2.55212e+07	797571	3.09795e+07	4.55631e+07	5.83526e+07	4.61222e+07	7.67865e+06	6.70403e+07	1.73222e+07	2.59871e+07	1.22365e+07	1.10425e+07	2.27674e+07	2.83639e+07	2.01756e+07	2.52873e+07
PC(36:0e)	PC	M+H	776.653	16.5725	C44 H91 O7 N1 P1	3.01944e+07	738268	3.08372e+07	3.35314e+07	4.03884e+07	3.27989e+07	7.10937e+06	4.13845e+07	1.33958e+07	2.12931e+07	1.20087e+07	1.13601e+07	1.74812e+07	1.95131e+07	1.66472e+07	1.72234e+07
PC(18:0_18:1)	PC	M+Na	810.598	14.6882	C44 H86 O8 N1 P1 Na1	1.01796e+08	4.58321e+06	9.21349e+07	1.12737e+08	1.44431e+08	1.33392e+08	7.98824e+07	8.64557e+07	1.41716e+08	1.18578e+08	1.09489e+08	9.88287e+07	1.1303e+08	1.03805e+08	8.21625e+07	9.23079e+07
PC(20:1e_16:0)	PC	M+H	774.637	15.7903	C44 H89 O7 N1 P1	31109.9	933.484	41437.5	68241.4	2.44323e+06	3.88242e+06	694467	998547	1.60668e+06	2.32507e+06	1.33234e+06	1.21087e+06	625190	521338	708043	854961
PC(36:1e)	PC	M+Na	796.619	16.395	C44 H88 O7 N1 P1 Na1	1.08136e+06	0	451545	536953	504546	462674	34107.4	1.23268e+06	425622	699188	456122	425448	252144	420754	288501	344919
PC(16:1_20:1)	PC	M+Na	808.583	13.6481	C44 H84 O8 N1 P1 Na1	7.6684e+07	100026	7.03225e+07	1.08418e+08	4.93988e+07	3.60591e+07	1.3282e+07	1.09624e+08	3.71799e+07	4.5376e+07	3.53856e+07	3.85601e+07	2.67971e+07	2.51806e+07	4.32166e+07	3.12343e+07
PC(22:1_14:1)	PC	M+H	786.601	18.117	C44 H85 O8 N1 P1	288043	100078	406321	55656.8	215692	857228	15536.3	131139	2.99168e+06	104044	159858	111703	37027.1	516596	14396.3	25512.4
PC(36:2e)	PC	M+Na	794.603	14.4545	C44 H86 O7 N1 P1 Na1	3203.25	0	651.194	23444.7	8.73453e+06	7.13836e+06	1.75303e+06	3.5631e+06	5.34626e+06	6.02789e+06	3.7696e+06	3.5095e+06	1.50908e+06	3.74915e+06	2.67226e+06	2.95667e+06
PC(18:1_18:2)	PC	M+Na	806.567	12.3202	C44 H82 O8 N1 P1 Na1	3.39325e+07	1.03234e+06	3.06423e+07	4.17917e+07	4.98603e+07	4.47593e+07	1.91492e+07	3.46624e+07	4.87726e+07	5.50417e+07	4.53282e+07	5.77333e+07	5.12766e+07	3.63653e+07	4.55135e+07	5.15427e+07
PC(36:3)	PC	M+H	784.585	14.6134	C44 H83 O8 N1 P1	2.25087e+07	1.27964e+06	2.21181e+07	2.9693e+07	2.46892e+07	1.96344e+07	1.25351e+07	2.86774e+07	1.99929e+07	2.70353e+07	1.60945e+07	1.61256e+07	2.05574e+07	2.28985e+07	1.99399e+07	1.33061e+07
PC(18:0_18:3)	PC	M+H	784.585	14.9935	C44 H83 O8 N1 P1	1.90389e+06	25130.9	1.85893e+06	2.13269e+06	4.96042e+06	4.70045e+06	933725	6.17486e+06	3.20551e+06	5.15161e+06	2.86927e+06	2.72466e+06	3.03559e+06	3.33169e+06	2.45988e+06	1.70796e+06
PC(18:3e_18:0)	PC	M+H	770.606	15.4216	C44 H85 O7 N1 P1	1.95309e+06	21519	1.91794e+06	2.00816e+06	4.78096e+07	4.21663e+07	6.4559e+06	3.56173e+07	1.46694e+07	2.73648e+07	1.34111e+07	1.33206e+07	1.18591e+07	1.45467e+07	1.28444e+07	1.15577e+07
PC(18:2_18:2)	PC	M+Na	804.551	11.2448	C44 H80 O8 N1 P1 Na1	1.01571e+07	25148.9	1.48133e+07	7.28304e+06	2.91497e+07	2.65944e+07	3.30434e+06	3.57861e+07	2.59002e+07	2.98756e+07	1.81634e+07	1.87759e+07	1.17097e+07	2.06324e+07	1.43263e+07	1.23742e+07
PC(36:4)	PC	M+H	782.569	12.0011	C44 H81 O8 N1 P1	3.58925e+08	2.45965e+07	3.03203e+08	5.26738e+08	3.87431e+08	3.38561e+08	6.26164e+07	6.98311e+08	5.01174e+08	6.26679e+08	7.47837e+08	6.08546e+08	5.3992e+08	3.33334e+08	4.77574e+08	4.73175e+08
PC(18:4_18:0)	PC	M+H	782.569	13.954	C44 H81 O8 N1 P1	1.27681e+07	772963	9.39198e+06	1.1767e+07	4.57505e+06	2.9676e+06	625607	3.08812e+06	1.78774e+06	2.50827e+06	3.75449e+06	1.87887e+06	2.76606e+06	3.64514e+06	799203	3.61323e+06
PC(36:4e)	PC	M+H	768.59	12.833	C44 H83 O7 N1 P1	1.31107e+07	4.17558e+06	7.87178e+06	9.64905e+06	4.62011e+08	3.67177e+08	9.74465e+07	3.9461e+08	6.10588e+08	7.05577e+08	7.02804e+08	6.93045e+08	3.56471e+08	2.6032e+08	3.73684e+08	3.78271e+08
PC(18:3e_18:1)	PC	M+H	768.59	13.613	C44 H83 O7 N1 P1	6.88891e+07	5.07111e+06	5.24024e+07	8.34347e+07	6.66397e+06	4.28516e+06	2.36828e+06	2.84945e+06	3.58002e+06	3.23589e+06	2.9776e+06	2.93554e+07	3.54691e+07	3.11988e+07	2.14918e+06	3.5561e+07
PC(16:1e_20:3)	PC	M+H	768.59	14.209	C44 H83 O7 N1 P1	9.7453e+06	15249.5	6.907e+06	1.33262e+07	1.18778e+08	1.04147e+08	3.24888e+07	2.84752e+07	1.30788e+08	1.20051e+08	9.74493e+07	1.07888e+08	6.37791e+07	7.63957e+07	7.25964e+07	6.51912e+07
PC(14:1e_22:3)	PC	M+H	768.59	15.6132	C44 H83 O7 N1 P1	27045.9	1168.47	19712.1	18549	1.14637e+06	1.04515e+06	160148	1.41771e+06	1.16533e+06	2.37956e+06	1.33166e+06	1.20353e+06	632585	777977	723229	658201
PC(36:5)	PC	M+H	780.554	12.1961	C44 H79 O8 N1 P1	1.22951e+08	1.2276e+06	1.13286e+08	1.48413e+08	5.91643e+07	5.2379e+07	3.57818e+07	1.20888e+08	5.55994e+07	6.44618e+07	7.2728e+07	1.0971e+08	1.79606e+08	5.38331e+07	1.74055e+08	7.3633e+07
PC(36:5e)	PC	M+H	766.575	11.4605	C44 H81 O7 N1 P1	2.5194e+06	30764.1	301768	1.35229e+06	331144	4.36321e+06	1.82779e+06	2.20942e+06	4.89755e+06	5.68063e+06	6.22476e+06	6.09515e+06	2.29852e+06	59640	386027	1.96321e+06
PC(14:1e_22:4)	PC	M+H	766.575	14.4499	C44 H81 O7 N1 P1	12945.9	461.131	6290.63	15988.4	179355	252361	72789.4	360917	554026	506243	431554	328362	119864	145995	116076	204613
PC(36:6)	PC	M+H	778.538	10.9403	C44 H77 O8 N1 P1	8.3855e+06	196744	5.59017e+06	7.401e+06	6.58063e+06	5.65668e+06	1.72286e+06	1.12965e+07	4.54467e+06	6.54658e+06	7.08333e+06	6.53687e+06	5.68253e+06	4.76117e+06	4.54376e+06	7.10918e+06
PC(14:0e_22:6)	PC	M+H	764.559	10.8807	C44 H79 O7 N1 P1	2.91203e+06	68058.4	1.6267e+06	2.08869e+06	3.39758e+06	2.51845e+06	2.14623e+06	7.94356e+06	3.94094e+06	9.5173e+06	4.1559e+06	4.15523e+06	4.05223e+06	2.25396e+06	3.45436e+06	3.49038e+06
PC(36:6e)	PC	M+H	764.559	11.2139	C44 H79 O7 N1 P1	8.58623e+06	131180	4.64541e+06	7.97505e+06	579994	686261	1.25441e+06	3.07793e+06	3.24094e+06	3.09948e+06	4.63736e+06	5.14411e+06	4.6853e+06	1.14893e+06	2.92893e+06	3.33015e+06
PC(14:1e_22:5)	PC	M+H	764.559	13.674	C44 H79 O7 N1 P1	92593.9	21131.8	41969.2	88980.1	2.25315e+06	1.86259e+06	511207	3.63275e+06	4.89428e+06	6.4852e+06	4.35244e+06	4.31652e+06	2.28062e+06	1.93337e+06	2.18137e+06	2.01608e+06
PC(36:7)	PC	M+H	776.522	10.563	C44 H75 O8 N1 P1	8.37769e+06	53015.6	5.70587e+06	7.07501e+06	2.69751e+06	2.16793e+06	321053	7.76572e+06	2.54145e+06	3.46105e+06	3.58106e+06	3.14584e+06	4.27495e+06	2.71115e+06	3.21644e+06	3.33683e+06
PC(22:6_14:1)	PC	M+H	776.522	11.285	C44 H75 O8 N1 P1	5.0568e+06	0	2.58201e+06	4.06497e+06	3.90798e+06	3.42981e+06	970507	1.27959e+07	2.50288e+06	3.79245e+06	4.32726e+06	4.08059e+06	4.21541e+06	2.73138e+06	3.88287e+06	4.39277e+06
PC(14:1e_22:6)	PC	M+H	762.543	12.9686	C44 H77 O7 N1 P1	140311	486897	414492	555011	8.48797e+06	6.8798e+06	1.80695e+06	1.11143e+07	7.04112e+06	1.00432e+07	7.32989e+06	6.80177e+06	4.59841e+06	4.03186e+06	4.96326e+06	4.08658e+06
PC(37:0)	PC	M+H	804.648	16.1839	C45 H91 O8 N1 P1	2.54616e+06	5242.45	2.72189e+06	3.13567e+06	1.53631e+06	1.3979e+06	196092	2.6496e+06	300475	605907	247529	215140	951630	1.06298e+06	1.07846e+06	680320
PC(37:0e)	PC	M+H	790.668	17.0317	C45 H93 O7 N1 P1	2.85739e+06	7701.92	3.28735e+06	3.31832e+06	2.24318e+06	2.34111e+06	406581	4.28302e+06	1.08634e+06	1.52968e+06	870329	928911	1.16644e+06	1.60021e+06	1.18323e+06	1.3694e+06
PC(19:1_18:1)	PC	M+H	800.616	14.0138	C45 H87 O8 N1 P1	4.66365e+08	1.04365e+07	3.73856e+08	5.31236e+08	4.26909e+08	3.53636e+08	8.99573e+07	3.02424e+08	2.75377e+08	3.66061e+08	2.34819e+08	2.25717e+08	2.6403e+08	2.72661e+08	2.94631e+08	2.12504e+08
PC(37:2e)	PC	M+H	786.637	15.813	C45 H89 O7 N1 P1	426765	8060.83	146163	161684	3.65195e+06	2.65756e+06	430755	2.53357e+06	928364	1.4473e+06	593666	657528	636458	997071	870573	320401
PC(37:3)	PC	M+Na	820.583	12.9371	C45 H84 O8 N1 P1 Na1	4.60172e+06	5483.83	3.70083e+06	4.55577e+06	4.35224e+06	3.54712e+06	1.09344e+06	5.52512e+06	3.66392e+06	3.77404e+06	1.60452e+06	1.81451e+06	3.05141e+06	3.05232e+06	4.25366e+06	1.8924e+06
PC(37:3e)	PC	M+H	784.621	14.177	C45 H87 O7 N1 P1	167434	452.298	87981.2	704547	5.16747e+06	4.76617e+06	1.39508e+06	1.13881e+06	4.5101e+06	5.90911e+06	2.83054e+06	4.202e+06	1.06607e+06	1.42791e+06	1.77273e+06	1.08302e+06
PC(37:4)	PC	M+H	796.585	12.6975	C45 H83 O8 N1 P1	2.68796e+07	981202	1.78721e+07	2.69145e+07	1.44246e+07	1.50329e+07	5.19635e+06	1.00931e+07	3.81876e+07	3.37551e+07	4.4721e+07	4.39585e+07	5.43855e+06	1.88169e+07	2.7997e+07	1.13184e+07
PC(37:5)	PC	M+H	794.569	12.7405	C45 H81 O8 N1 P1	4.82152e+07	824164	3.86898e+07	5.71277e+07	2.70219e+07	2.32624e+07	9.93406e+06	1.93703e+07	3.02265e+07	3.21017e+07	3.44262e+07	3.01391e+07	2.44653e+07	2.51974e+07	3.18756e+07	3.27576e+07
PC(37:5e)	PC	M+H	780.59	13.1881	C45 H83 O7 N1 P1	171118	279642	239348	375499	3.45282e+06	3.00729e+06	142470	6.07785e+06	5.94596e+06	6.24777e+06	5.63384e+06	6.59509e+06	2.83709e+06	2.24161e+06	2.45207e+06	2.92602e+06
PC(37:6)	PC	M+H	792.554	10.8409	C45 H79 O8 N1 P1	1.0103e+07	511736	6.15404e+06	8.25948e+06	7.26941e+06	1.97447e+06	1.29488e+06	1.1517e+07	4.10294e+06	5.58222e+06	4.91204e+06	5.42595e+06	5.36509e+06	3.7856e+06	4.04884e+06	5.58465e+06
PC(38:0)	PC	M+H	818.663	16.8868	C46 H93 O8 N1 P1	8.18819e+06	133603	8.52826e+06	9.22091e+06	1.27654e+07	1.04339e+07	1.97504e+06	1.79029e+07	1.96655e+06	3.95633e+06	1.72473e+06	1.66886e+06	4.61031e+06	5.55784e+06	4.21454e+06	4.18479e+06
PC(38:0e)	PC	M+H	804.684	17.4576	C46 H95 O7 N1 P1	8.7251e+06	214777	1.11112e+07	1.14128e+07	1.82568e+07	1.52317e+07	2.74116e+06	2.24295e+07	5.29618e+06	8.3754e+06	4.22445e+06	4.11323e+06	6.50152e+06	8.55509e+06	6.25562e+06	6.78032e+06
PC(38:1)	PC	M+H	816.648	15.8726	C46 H91 O8 N1 P1	3.69739e+07	1.22989e+06	1.31652e+08	1.62126e+08	3.733e+08	2.99525e+08	5.09527e+07	2.49363e+08	7.81545e+07	1.02768e+08	5.55382e+07	5.18529e+07	6.15944e+07	1.25602e+08	9.37427e+07	1.10806e+08
PC(38:1e)	PC	M+H	802.668	16.5877	C46 H93 O7 N1 P1	4.66259e+07	1.24795e+06	4.98937e+07	5.24008e+07	8.56752e+07	7.2435e+07	8.5099e+06	5.1869e+07	3.33534e+07	4.57297e+07	2.80808e+07	2.24975e+07	2.94891e+07	3.62522e+07	2.90845e+07	3.22996e+07
PC(20:1_18:1)	PC	M+Na	836.614	14.618	C46 H88 O8 N1 P1 Na1	4.96379e+07	2.07124e+06	5.77264e+07	7.55895e+07	5.27869e+07	3.94976e+07	1.97842e+07	3.47574e+07	3.81827e+07	3.67861e+07	1.55703e+07	2.54515e+07	3.98731e+07	3.87089e+07	1.43344e+07	1.14471e+07
PC(38:2e)	PC	M+H	800.653	16.3965	C46 H91 O7 N1 P1	1.60766e+07	194409	1.3738e+07	1.32967e+07	2.67238e+07	2.3385e+07	3.78984e+06	1.17748e+07	9.60047e+06	1.0058e+07	6.55755e+06	7.90221e+06	8.37888e+06	1.13395e+07	1.01957e+07	7.94069e+06
PC(38:3)	PC	M+H	812.616	15.804	C46 H87 O8 N1 P1	1.63367e+06	2601.63	2.02237e+06	2.85773e+06	5.54209e+06	4.43736e+06	639109	6.18458e+06	1.71691e+06	2.28271e+06	1.17753e+06	1.06202e+06	2.17873e+06	2.83127e+06	2.04054e+06	2.42149e+06
PC(38:4)	PC	M+H	810.601	14.7155	C46 H85 O8 N1 P1	1.00877e+08	4.47968e+06	9.17624e+07	1.12042e+08	1.4248e+08	1.20495e+08	7.78155e+07	8.49881e+07	1.40126e+08	1.17124e+08	1.03283e+08	9.30788e+07	1.11582e+08	1.02828e+08	8.11988e+07	9.14316e+07
PC(38:4e)	PC	M+H	796.621	14.1724	C46 H87 O7 N1 P1	2.01574e+06	330509	1.80134e+06	2.56997e+06	1.713e+08	1.40097e+08	4.27769e+07	1.61954e+08	2.57307e+08	3.11571e+08	2.43983e+08	2.35692e+08	9.54753e+07	1.22625e+08	1.12345e+08	1.03487e+08
PC(18:1_20:4)	PC	M+Na	830.567	12.0411	C46 H82 O8 N1 P1 Na1	9.98239e+06	1.95973e+06	9.57383e+06	1.43897e+07	1.0797e+07	8.76861e+06	8.53862e+06	1.70675e+07	2.13377e+07	2.208e+07	2.77048e+07	2.3887e+07	2.02925e+07	1.42813e+07	1.78652e+07	1.72638e+07
PC(38:5)	PC	M+H	808.585	13.5074	C46 H83 O8 N1 P1	7.91837e+07	2.64405e+07	8.40443e+07	1.13016e+08	8.57472e+07	6.98443e+07	4.04564e+07	1.09028e+08	9.6179e+07	8.9399e+07	4.04946e+07	8.7248e+07	5.09127e+07	7.53124e+07	1.06796e+08	1.02589e+08
PC(38:5e)	PC	M+H	794.606	13.9366	C46 H85 O7 N1 P1	2.87817e+06	21160.1	2.73426e+06	3.93978e+06	6.37162e+07	5.09649e+07	1.39248e+07	7.19088e+07	8.34125e+07	1.02378e+08	7.4028e+07	4.93332e+07	4.64067e+07	3.81959e+07	4.20103e+07	3.68248e+07
PC(16:1e_22:4)	PC	M+H	794.606	15.5956	C46 H85 O7 N1 P1	78072.1	0	96046.5	113777	808498	715443	106192	1.46534e+06	1.71291e+06	2.47158e+06	1.51231e+06	1.19704e+06	621455	732734	729718	648515
PC(38:6)	PC	M+H	806.569	12.3174	C46 H81 O8 N1 P1	3.39008e+07	1.04303e+06	2.85843e+07	3.49572e+07	5.47266e+07	4.31141e+07	1.91762e+07	3.63221e+07	4.93613e+07	5.28465e+07	4.41428e+07	6.30754e+07	5.06168e+07	3.76753e+07	4.26763e+07	5.24181e+07
PC(20:4e_18:2)	PC	M+H	792.59	11.859	C46 H83 O7 N1 P1	535694	7471.31	122850	376610	1.29439e+07	1.03686e+07	4.71143e+06	1.29365e+07	1.02813e+07	7.90017e+06	1.1357e+07	7.51542e+06	7.35822e+06	4.72689e+06	6.5296e+06	6.11534e+06
PC(38:6e)	PC	M+H	792.59	13.003	C46 H83 O7 N1 P1	176977	762.15	32636	443810	1.2261e+07	1.07377e+07	2.70071e+06	1.5289e+07	7.12647e+06	9.53509e+06	6.78029e+06	7.51559e+06	2.79118e+06	3.2131e+06	2.391e+06	1.4169e+06
PC(38:7)	PC	M+H	804.554	10.2677	C46 H79 O8 N1 P1	7.08204e+07	1.27062e+06	4.40695e+07	5.13775e+07	2.30953e+07	2.66343e+07	1.08363e+07	4.78926e+07	2.30677e+07	3.39519e+07	3.25079e+07	3.29988e+07	3.35538e+07	1.84352e+07	3.58085e+07	2.67745e+07
PC(38:7e)	PC	M+Na	812.556	12.1387	C46 H80 O7 N1 P1 Na1	36689	490.052	56911.5	483884	6.60071e+06	5.09561e+06	2.56689e+06	6.31823e+06	4.33157e+06	4.41209e+06	5.18995e+06	4.83982e+06	3.7766e+06	2.31874e+06	3.3453e+06	3.26439e+06
PC(38:8)	PC	M+H	802.538	11.0343	C46 H77 O8 N1 P1	2.57993e+07	177696	1.42186e+07	1.646e+07	5.76902e+06	4.4329e+06	2.49703e+06	1.45706e+07	1.85369e+06	6.94645e+06	2.52411e+06	2.15962e+06	7.2359e+06	5.50179e+06	5.81724e+06	5.5821e+06
PC(38:9)	PC	M+H	800.522	9.729	C46 H75 O8 N1 P1	1.17522e+06	1805.64	857566	693256	133736	100260	59947.3	470445	100315	199804	130241	99777.1	315052	211720	294572	287139
PC(39:0)	PC	M+H	832.679	17.1256	C47 H95 O8 N1 P1	1.33411e+06	1704.9	1.30411e+06	1.3625e+06	761378	635941	82850.9	965252	116719	179519	85314.6	24608.1	401765	437016	395451	420078
PC(39:0e)	PC	M+H	818.7	17.83	C47 H97 O7 N1 P1	653994	4644.95	777938	812543	1.25688e+06	1.11589e+06	189620	1.50787e+06	335403	646746	395702	354125	564167	690088	531530	555085
PC(39:3e)	PC	M+H	812.653	15.2034	C47 H91 O7 N1 P1	382168	0	5.92336e+06	219015	1.42023e+06	1.14301e+06	271895	1.55497e+06	2.39122e+06	4.07186e+06	2.05746e+06	2.0106e+06	755956	1.00376e+06	750651	713537
PC(39:4)	PC	M+H	824.616	13.2292	C47 H87 O8 N1 P1	5.52646e+06	100999	5.73417e+06	9.38506e+06	5.10379e+06	4.50145e+06	712931	1.08302e+07	5.16047e+06	5.98446e+06	5.46619e+06	5.589e+06	4.8065e+06	5.09376e+06	6.21103e+06	5.73676e+06
PC(39:4e)	PC	M+H	810.637	14.1765	C47 H89 O7 N1 P1	251786	125167	240903	346651	1.04401e+06	839157	232766	1.71035e+06	3.80061e+06	4.33666e+06	3.35161e+06	3.30132e+06	709914	887903	941164	940566
PC(39:5)	PC	M+H	822.601	12.6785	C47 H85 O8 N1 P1	2.92746e+07	770481	2.39546e+07	3.12655e+07	1.18948e+07	6.80979e+06	3.65538e+06	3.39379e+07	2.86863e+07	2.71418e+07	2.65492e+07	2.60696e+07	2.26375e+07	1.95767e+07	2.36378e+07	1.90948e+07
PC(39:5e)	PC	M+H	808.621	14.226	C47 H87 O7 N1 P1	682136	1384.93	541166	801848	377554	275853	65754.3	909581	1.27331e+06	1.86803e+06	1.37911e+06	1.23374e+06	338564	156715	321734	126486
PC(39:6)	PC	M+H	820.585	12.9467	C47 H83 O8 N1 P1	4.60172e+06	5483.83	3.70083e+06	4.55577e+06	4.35224e+06	3.54712e+06	1.09344e+06	5.52512e+06	3.66392e+06	3.77404e+06	1.60452e+06	1.81451e+06	3.05141e+06	3.05232e+06	4.25366e+06	1.8924e+06
PC(17:1_22:6)	PC	M+Na	840.551	10.9247	C47 H80 O8 N1 P1 Na1	170730	0	690963	486233	1.18126e+06	1.06297e+06	79094.2	3.10888e+06	813005	1.11811e+06	948278	923944	1.1351e+06	705264	1.01757e+06	1.02635e+06
PC(39:7)	PC	M+H	818.569	10.9247	C47 H81 O8 N1 P1	1.25612e+07	164511	7.56846e+06	9.34782e+06	1.08066e+07	9.28153e+06	3.46077e+06	3.12103e+07	8.98102e+06	1.15627e+07	1.35862e+07	1.19406e+07	1.09562e+07	6.75643e+06	9.26857e+06	1.02972e+07
PC(40:0)	PC	M+Na	868.677	17.7036	C48 H96 O8 N1 P1 Na1	793040	2920.79	833580	916379	1.29091e+06	1.31764e+06	222779	1.57945e+06	137165	255021	149826	132005	427633	574876	453436	464103
PC(40:0e)	PC	M+H	832.715	18.1653	C48 H99 O7 N1 P1	786072	150089	936359	995748	6.61873e+06	5.69758e+06	1.0745e+06	5.14517e+06	1.2643e+06	1.93702e+06	1.21573e+06	1.06945e+06	1.60611e+06	1.99113e+06	1.54839e+06	1.48549e+06
PC(40:1e)	PC	M+H	830.7	17.4559	C48 H97 O7 N1 P1	1.79714e+07	380301	2.23917e+07	2.20432e+07	3.22153e+07	2.77295e+07	4.74957e+06	2.31281e+07	1.09976e+07	1.03373e+07	9.15154e+06	8.53825e+06	1.13629e+07	1.0861e+07	9.20103e+06	8.6938e+06
PC(40:2e)	PC	M+H	828.684	16.426	C48 H95 O7 N1 P1	2.51418e+07	521609	2.09797e+07	2.15941e+07	1.08407e+07	1.75966e+07	4.03005e+06	1.32081e+07	9.70098e+06	1.4013e+07	9.43584e+06	8.73555e+06	1.20238e+07	1.32338e+07	9.49569e+06	8.75995e+06
PC(40:3)	PC	M+H	840.648	15.244	C48 H91 O8 N1 P1	3.97003e+06	100178	4.31076e+06	5.30127e+06	9.46724e+06	8.43784e+06	1.49278e+06	1.17969e+07	3.8893e+06	6.46789e+06	3.41748e+06	3.65208e+06	2.72072e+06	5.09161e+06	3.53275e+06	3.71573e+06
PC(40:3e)	PC	M+H	826.668	16.39	C48 H93 O7 N1 P1	1.57152e+06	0	341976	112240	6.09376e+06	4.90448e+06	681670	3.09714e+06	1.54562e+06	1.66463e+06	1.44266e+06	1.34176e+06	1.27684e+06	1.46702e+06	1.16986e+06	1.47643e+06
PC(40:4)	PC	M+H	838.632	15.801	C48 H89 O8 N1 P1	6.21133e+06	139201	8.34883e+06	1.08959e+07	3.20448e+07	2.67882e+07	3.79252e+06	2.05116e+07	7.30931e+06	4.65084e+06	4.86587e+06	1.41507e+06	3.60971e+06	1.11089e+07	8.28162e+06	9.7257e+06
PC(40:4e)	PC	M+Na	846.635	15.4202	C48 H90 O7 N1 P1 Na1	165135	0	156742	286487	974711	1.09399e+06	15944.1	1.49988e+06	1.34301e+06	1.93503e+06	1.08868e+06	1.1186e+06	587483	660990	572499	549787
PC(40:5)	PC	M+H	836.616	13.3157	C48 H87 O8 N1 P1	4.76149e+07	5.67515e+06	4.43297e+07	6.19374e+07	2.31324e+07	2.23544e+07	1.19737e+07	2.70652e+07	4.68643e+07	5.22873e+07	4.31443e+07	3.8046e+07	4.54515e+07	3.36068e+07	3.89519e+07	4.0331e+07
PC(40:5e)	PC	M+H	822.637	14.835	C48 H89 O7 N1 P1	6.18815e+06	6325.09	4.93466e+06	7.23944e+06	3.34561e+06	3.13099e+06	551019	6.30686e+06	8.42574e+06	9.13654e+06	5.94217e+06	5.13389e+06	2.24091e+06	2.51302e+06	2.34414e+06	2.35033e+06
PC(18:0_22:6)	PC	M+Na	856.583	12.9432	C48 H84 O8 N1 P1 Na1	1.09306e+07	79894.5	8.59958e+06	1.11805e+07	1.13393e+07	8.94157e+06	2.80432e+06	1.61513e+07	6.68101e+06	7.96889e+06	6.6325e+06	6.06908e+06	8.69422e+06	7.08043e+06	1.09414e+07	8.54508e+06
PC(40:6)	PC	M+H	834.601	12.9432	C48 H85 O8 N1 P1	1.17577e+08	1.99306e+06	9.54165e+07	1.17462e+08	1.5716e+08	1.25911e+08	3.55191e+07	2.86369e+08	8.97155e+07	1.23461e+08	6.44035e+07	8.74694e+07	1.04188e+08	8.48025e+07	1.27774e+08	1.04887e+08
PC(40:6e)	PC	M+H	820.621	12.8216	C48 H87 O7 N1 P1	3.35547e+06	55066.2	2.25496e+06	2.50885e+06	8.76374e+06	6.16834e+06	2.0713e+06	1.3597e+07	1.28322e+07	1.84608e+07	1.49264e+07	8.51856e+06	8.14571e+06	6.39985e+06	8.61385e+06	9.52121e+06
PC(22:5_18:2)	PC	M+Na	854.567	11.2439	C48 H82 O8 N1 P1 Na1	1.05947e+06	0	1.62972e+06	649492	2.4734e+06	2.32658e+06	244507	3.03381e+06	2.60661e+06	3.30967e+06	507226	1.83507e+06	1.25428e+06	1.88316e+06	1.29468e+06	2.25876e+06
PC(40:7)	PC	M+H	832.585	12.9443	C48 H83 O8 N1 P1	9.22272e+06	10976.3	7.66859e+06	1.00908e+07	6.56546e+06	4.24115e+06	1.701e+06	8.41685e+06	1.04343e+07	1.08458e+07	1.05014e+07	1.00587e+07	8.94425e+06	6.84439e+06	8.97907e+06	7.34458e+06
PC(40:7e)	PC	M+H	818.606	13.5151	C48 H85 O7 N1 P1	573606	6141.61	872813	917923	2.84633e+07	2.24898e+07	7.30183e+06	3.55055e+07	2.67773e+07	3.01884e+07	2.27621e+07	2.54456e+07	1.66604e+07	1.37093e+07	1.56411e+07	1.72304e+07
PC(40:8)	PC	M+H	830.569	10.498	C48 H81 O8 N1 P1	2.06692e+07	116265	4.30213e+06	5.10119e+06	2.74433e+07	2.30752e+07	8.85341e+06	8.29046e+07	2.24214e+07	3.31431e+07	3.48385e+07	3.33902e+07	3.24189e+07	1.58671e+07	2.57248e+07	2.43306e+07
PC(40:8e)	PC	M+H	816.59	12.1553	C48 H83 O7 N1 P1	569331	2337.3	451998	737633	1.96647e+07	1.60852e+07	6.21984e+06	2.93317e+07	1.94912e+07	2.28485e+07	2.38548e+07	2.17799e+07	1.45465e+07	9.97088e+06	1.23688e+07	1.37806e+07
PC(40:9)	PC	M+H	828.554	9.66282	C48 H79 O8 N1 P1	2.40253e+06	32988.9	1.69542e+06	1.62265e+06	1.07487e+06	779897	418417	2.47331e+06	773104	1.74604e+06	2.62039e+06	1.2721e+06	1.34531e+06	696628	1.46231e+06	1.28248e+06
PC(41:0)	PC	M+H	860.71	17.903	C49 H99 O8 N1 P1	1.52536e+06	24192.4	1.72445e+06	1.8151e+06	1.42561e+06	1.25688e+06	209491	1.17494e+06	94584.2	153757	51679.1	70231.4	615837	765371	570379	601879
PC(41:1)	PC	M+H	858.695	17.3371	C49 H97 O8 N1 P1	3.08639e+06	81975.3	3.81556e+06	9.04948e+06	1.05058e+07	9.43586e+06	1.31904e+06	8.6762e+06	1.65073e+06	2.09153e+06	1.44951e+06	1.2014e+06	4.28452e+06	3.1187e+06	2.55227e+06	2.67124e+06
PC(41:3)	PC	M+H	854.663	15.2889	C49 H93 O8 N1 P1	7.46706e+06	120158	7.39933e+06	8.79113e+06	7.94163e+06	6.30843e+06	903907	8.26044e+06	4.41455e+06	6.05058e+06	2.73779e+06	3.44269e+06	3.62566e+06	4.91684e+06	3.97991e+06	3.45725e+06
PC(41:4)	PC	M+H	852.648	14.4112	C49 H91 O8 N1 P1	1.06413e+07	157008	9.37037e+06	9.31212e+06	4.8144e+06	4.43478e+06	653989	7.33426e+06	7.0173e+06	9.334e+06	4.64221e+06	4.1495e+06	4.04106e+06	6.10518e+06	4.87665e+06	3.86111e+06
PC(41:4e)	PC	M+H	838.668	15.2417	C49 H93 O7 N1 P1	119339	9340.28	105596	143743	764985	1.13065e+06	193004	455084	1.81497e+06	3.87313e+06	1.57001e+06	1.55516e+06	710325	764716	1.18791e+06	868354
PC(41:5)	PC	M+H	850.632	13.7343	C49 H89 O8 N1 P1	2.99887e+06	72141.8	2.87149e+06	4.34574e+06	1.71412e+06	1.56433e+06	378234	1.28092e+06	2.88614e+06	1.80732e+06	1.78056e+06	1.8114e+06	1.11122e+06	1.2973e+06	1.63049e+06	2.16438e+06
PC(41:5e)	PC	M+H	836.653	14.3135	C49 H91 O7 N1 P1	30135.8	0	16951.1	28926.8	1.24033e+06	876720	34839.8	2.32248e+06	3.47265e+06	3.5517e+06	3.19309e+06	2.19262e+06	1.04724e+06	1.02541e+06	1.14696e+06	1.14848e+06
PC(41:6)	PC	M+H	848.616	12.4688	C49 H87 O8 N1 P1	1.21901e+07	197004	1.04028e+07	1.34496e+07	2.12339e+06	1.57791e+06	517834	6.31147e+06	4.08703e+06	4.95116e+06	4.86278e+06	6.22525e+06	5.9489e+06	4.15741e+06	3.23895e+06	5.02381e+06
PC(41:7)	PC	M+H	846.601	12.2541	C49 H85 O8 N1 P1	6.20719e+06	185423	5.0411e+06	6.89087e+06	3.96532e+06	3.38501e+06	1.60315e+06	9.74756e+06	3.8951e+06	5.12327e+06	4.71634e+06	5.68684e+06	5.9478e+06	3.69708e+06	4.13827e+06	4.88165e+06
PC(42:10)	PC	M+H	854.569	9.743	C50 H81 O8 N1 P1	528660	1427.81	527107	586828	321318	111437	274019	455093	246516	676039	143196	138619	520216	293409	425667	503502
PC(42:11)	PC	M+H	852.554	9.2836	C50 H79 O8 N1 P1	2.71511e+06	30905.6	1.54559e+06	1.73052e+06	974294	738994	1.88633e+06	4.11566e+06	1.00341e+06	3.81263e+06	893465	835845	1.98633e+06	1.17594e+06	1.82353e+06	1.79581e+06
PC(20:5_22:6)	PC	M+H	852.554	10.531	C50 H79 O8 N1 P1	128218	0	25087.2	464911	2.03906e+06	1.79867e+06	321262	6.31465e+06	1.71672e+06	2.71374e+06	2.20058e+06	2.01222e+06	1.91972e+06	1.33388e+06	1.7479e+06	1.70431e+06
PC(42:1e)	PC	M+H	858.731	18.1529	C50 H101 O7 N1 P1	1.92232e+06	21163.2	2.22535e+06	2.13785e+06	7.05405e+06	6.40662e+06	1.17617e+06	4.56399e+06	1.76917e+06	2.43698e+06	1.4403e+06	1.39515e+06	1.89104e+06	2.06662e+06	1.73753e+06	1.71444e+06
PC(42:2)	PC	M+Na	892.677	17.0801	C50 H96 O8 N1 P1 Na1	150680	0	573954	377051	1.82248e+06	1.56376e+06	213679	912726	407290	297250	322270	100608	347986	648860	603517	468604
PC(42:2e)	PC	M+H	856.715	17.3834	C50 H99 O7 N1 P1	2.43736e+06	25435.4	2.91559e+06	2.94993e+06	9.41587e+06	8.20525e+06	814086	5.83592e+06	2.09017e+06	3.90072e+06	1.33134e+06	1.12056e+06	1.6757e+06	3.26713e+06	2.38892e+06	2.52901e+06
PC(42:3)	PC	M+H	868.679	15.9187	C50 H95 O8 N1 P1	3.73451e+07	968511	4.1897e+07	5.30454e+07	6.542e+07	5.25536e+07	8.85061e+06	7.14575e+07	3.23784e+07	4.15428e+07	2.5629e+07	2.07117e+07	2.95437e+07	3.47195e+07	2.72907e+07	7.91357e+06
PC(42:3e)	PC	M+H	854.7	16.9333	C50 H97 O7 N1 P1	5.17023e+06	73064.4	4.70249e+06	4.63993e+06	1.11669e+06	1.55768e+06	376453	1.01045e+06	603687	939419	505025	1.14971e+06	1.3479e+06	1.39265e+06	1.55954e+06	1.08044e+06
PC(18:3e_24:0)	PC	M+H	854.7	17.272	C50 H97 O7 N1 P1	302954	13951	370928	375184	4.64985e+06	3.86511e+06	2.0955e+06	3.46233e+06	1.21524e+06	1.60951e+06	874989	943366	860362	1.08874e+06	1.01583e+06	865299
PC(31:0_11:4)	PC	M+Na	888.645	15.0587	C50 H92 O8 N1 P1 Na1	1.309e+06	3718.97	4.11898e+06	5.22342e+06	2.39561e+06	1.98022e+06	270975	1.01748e+06	3.13011e+06	3.48144e+06	2.12696e+06	1.76602e+06	2.24956e+06	2.52306e+06	1.33874e+06	1.68566e+06
PC(42:4e)	PC	M+H	852.684	16.015	C50 H95 O7 N1 P1	1.01249e+06	669.448	1.10746e+06	1.58125e+06	4.83013e+06	3.91329e+06	603442	4.30964e+06	9.40412e+06	1.24227e+07	8.32603e+06	6.7466e+06	3.15964e+06	3.65603e+06	3.21544e+06	2.61205e+06
PC(42:5e)	PC	M+H	850.668	16.3811	C50 H93 O7 N1 P1	2.51169e+06	2561.63	361184	1.82415e+06	1.68017e+06	2.12424e+06	89132.5	2.45274e+06	2.36423e+06	4.0808e+06	2.41214e+06	2.85747e+06	1.55198e+06	1.43675e+06	416152	1.11515e+06
PC(42:6)	PC	M+H	862.632	14.846	C50 H89 O8 N1 P1	6.39283e+06	12847.7	6.93098e+06	8.63603e+06	8.60868e+06	6.80195e+06	1.19053e+06	9.16432e+06	4.11724e+06	5.40791e+06	5.00411e+06	4.34227e+06	3.28114e+06	5.82486e+06	4.66981e+06	3.05865e+06
PC(42:6e)	PC	M+H	848.653	13.8551	C50 H91 O7 N1 P1	1.05703e+06	3321.44	1.05294e+06	1.417e+06	7.42864e+06	5.92175e+06	1.45956e+06	8.02605e+06	1.05003e+07	1.3974e+07	9.43759e+06	9.07855e+06	5.70271e+06	5.2895e+06	5.1025e+06	5.74776e+06
PC(42:7)	PC	M+H	860.616	12.9101	C50 H87 O8 N1 P1	5.67108e+07	843664	4.54049e+07	5.56459e+07	3.22132e+07	2.56878e+07	6.92224e+06	5.44335e+07	2.08879e+07	2.68368e+07	2.49901e+07	1.96371e+07	2.9919e+07	2.37514e+07	3.4301e+07	3.06829e+07
PC(42:7e)	PC	M+H	846.637	13.652	C50 H89 O7 N1 P1	48319.6	0	0	27075	4.94748e+06	4.01571e+06	1.15029e+06	5.95697e+06	6.48687e+06	7.4562e+06	6.45871e+06	5.50685e+06	1.48069e+06	2.61482e+06	3.18957e+06	3.0875e+06
PC(42:8)	PC	M+H	858.601	13.0288	C50 H85 O8 N1 P1	2.5307e+07	212969	2.21115e+07	3.10891e+07	7.76464e+06	4.24582e+06	1.82496e+06	1.60909e+07	1.31331e+07	1.31274e+07	7.33653e+06	1.23783e+07	1.58068e+07	1.20283e+07	1.51009e+07	1.38655e+07
PC(42:8e)	PC	M+H	844.621	12.9943	C50 H87 O7 N1 P1	134767	0	20120.5	182848	3.62151e+06	2.60726e+06	664522	3.97766e+06	1.94967e+06	2.20211e+06	1.9588e+06	2.17234e+06	1.3752e+06	1.12486e+06	1.41704e+06	1.34613e+06
PC(42:9)	PC	M+H	856.585	11.2011	C50 H83 O8 N1 P1	2.56075e+06	0	1.96557e+06	1.83223e+06	3.18718e+06	2.80527e+06	788275	7.23091e+06	3.6287e+06	4.01995e+06	4.49497e+06	4.38188e+06	3.1729e+06	2.62767e+06	2.86276e+06	3.2165e+06
PC(43:1)	PC	M+H	886.726	17.8047	C51 H101 O8 N1 P1	2.86302e+06	44656.7	3.26759e+06	3.28642e+06	833337	559399	51046.6	1.07494e+06	130334	250384	161328	122268	767483	993991	856560	777822
PC(27:1_16:0)	PC	M+H	886.726	18.0661	C51 H101 O8 N1 P1	6.01255e+06	25756.6	6.09464e+06	6.05675e+06	1.54282e+07	1.15067e+07	2.02795e+06	9.75886e+06	1.85323e+06	1.88948e+06	1.76558e+06	1.43103e+06	4.10593e+06	3.75869e+06	2.44604e+06	3.76758e+06
PC(43:3)	PC	M+H	882.695	16.3523	C51 H97 O8 N1 P1	4.93895e+06	13234.6	3.8767e+06	4.57068e+06	5.96947e+06	5.75601e+06	870600	8.71403e+06	2.77324e+06	3.11731e+06	2.1037e+06	2.06022e+06	2.97352e+06	3.07726e+06	3.09471e+06	2.20099e+06
PC(43:5)	PC	M+H	878.663	14.5254	C51 H93 O8 N1 P1	2.97606e+06	9520.88	2.87877e+06	2.7728e+06	363669	405304	14139.8	1.11789e+06	1.46134e+06	1.53385e+06	1.2068e+06	968157	754059	1.19288e+06	1.20136e+06	1.13459e+06
PC(43:6)	PC	M+H	876.648	13.7093	C51 H91 O8 N1 P1	4.20244e+06	22019.9	5.08344e+06	6.69536e+06	1.08898e+06	766131	207088	2.51218e+06	2.12415e+06	2.71551e+06	2.44958e+06	2.22535e+06	1.0515e+06	2.37338e+06	1.2488e+06	2.69627e+06
PC(43:7)	PC	M+H	874.632	13.551	C51 H89 O8 N1 P1	407592	2824.35	581912	622151	547139	442210	75191.4	2.02128e+06	460675	689839	453079	280404	508583	557776	609679	447295
PC(44:0)	PC	M+H	902.757	18.9279	C52 H105 O8 N1 P1	2.25613e+06	10031.1	2.31566e+06	2.21933e+06	8.31639e+06	7.37425e+06	1.6322e+06	8.35971e+06	661585	1.09645e+06	731806	610957	2.34022e+06	2.46949e+06	2.13467e+06	2.09249e+06
PC(44:10)	PC	M+H	882.601	11.216	C52 H85 O8 N1 P1	3.09401e+06	0.296	1.28528e+06	1.56234e+06	3.06028e+06	1.39943e+06	568038	1.32939e+07	2.87316e+06	3.38979e+06	3.78324e+06	6.22811e+06	2.41278e+06	1.74959e+06	2.06645e+06	2.22166e+06
PC(44:11)	PC	M+H	880.585	10.268	C52 H83 O8 N1 P1	3.3112e+06	1602.85	1.89366e+06	2.39726e+06	1.28271e+06	1.22152e+06	731167	5.09817e+06	1.60353e+06	2.99571e+06	2.42527e+06	2.06588e+06	2.51048e+06	1.30311e+06	2.08536e+06	2.0623e+06
PC(44:12)	PC	M+H	878.569	9.81447	C52 H81 O8 N1 P1	3.46714e+06	38104.4	1.89968e+06	2.21426e+06	2.10376e+06	1.69199e+06	1.48219e+06	7.76367e+06	1.79105e+06	3.97702e+06	2.37916e+06	2.36578e+06	3.04435e+06	1.62715e+06	2.80129e+06	2.69132e+06
PC(44:1e)	PC	M+H	886.762	19.1939	C52 H105 O7 N1 P1	864073	19483.6	67444.5	809365	3.52839e+06	2.50355e+06	709860	3.21946e+06	1.92006e+06	2.35989e+06	2.23251e+06	2.24132e+06	1.3472e+06	1.71411e+06	1.69424e+06	1.62275e+06
PC(44:2e)	PC	M+H	884.747	18.622	C52 H103 O7 N1 P1	1.42908e+06	1527.4	2.1871e+06	1.6351e+06	4.59289e+06	4.01163e+06	796128	2.83789e+06	850434	925407	3201.19	973741	1.27422e+06	1.56587e+06	334037	446360
PC(44:3)	PC	M+H	896.71	16.8362	C52 H99 O8 N1 P1	3.02391e+07	707525	2.18189e+07	2.34744e+07	3.59222e+07	3.21808e+07	5.54242e+06	4.86013e+07	1.67412e+07	2.27197e+07	1.28565e+07	1.34413e+07	1.58629e+07	1.7647e+07	1.3677e+07	1.48204e+07
PC(44:3e)	PC	M+H	882.731	17.9597	C52 H101 O7 N1 P1	17235.1	758.242	32631.6	12867.7	2.22372e+06	1.88913e+06	315563	1.65151e+06	413030	556857	413276	377845	462342	606832	401733	410879
PC(44:4)	PC	M+H	894.695	16.0567	C52 H97 O8 N1 P1	2.19339e+06	93288.6	7.99373e+06	9.11183e+06	1.04018e+07	8.57805e+06	1.57275e+06	1.43404e+07	7.5902e+06	1.05567e+07	4.00021e+06	5966641	5.96027e+06	7.26901e+06	7.12964e+06	4.34349e+06
PC(44:4e)	PC	M+H	880.715	17.4226	C52 H99 O7 N1 P1	310949	0	451015	386755	1.87591e+06	1.62376e+06	253027	1.57502e+06	1.13337e+06	1.49334e+06	894017	906715	617503	835797	642234	645734
PC(44:5)	PC	M+H	892.679	15.0966	C52 H95 O8 N1 P1	2.22795e+07	511215	2.88069e+07	3.14979e+07	1.26013e+07	1.23434e+07	1.70349e+06	2.65123e+07	2.26666e+07	2.94337e+07	1.56142e+07	1.64435e+07	1.42786e+07	1.72902e+07	1.10428e+07	1.22173e+07
PC(44:5e)	PC	M+H	878.7	16.4335	C52 H97 O7 N1 P1	1.76714e+06	1955.07	1.32122e+06	1.40884e+06	7.17635e+06	5.94051e+06	1.23411e+06	8.22959e+06	6.40911e+06	7.55356e+06	5.51137e+06	5.21118e+06	3.14745e+06	3.4532e+06	2.81965e+06	2.91594e+06
PC(44:6)	PC	M+H	890.663	14.2632	C52 H93 O8 N1 P1	6.82619e+07	1.24345e+06	6.16952e+07	7.41508e+07	2.61083e+07	2.20583e+07	5.26746e+06	4.46313e+07	3.43693e+07	4.32231e+07	3.04222e+07	2.78984e+07	2.88476e+07	3.35816e+07	2.97861e+07	2.85284e+07
PC(44:6e)	PC	M+H	876.684	16.1785	C52 H95 O7 N1 P1	955381	0	1.565e+06	2.01193e+06	5.5206e+06	4.5405e+06	660294	5.98493e+06	4.27137e+06	5.94898e+06	3.83802e+06	2.36557e+06	2.23642e+06	2.78233e+06	2.23317e+06	2.12944e+06
PC(44:7)	PC	M+H	888.648	14.161	C52 H91 O8 N1 P1	7.60894e+06	81741.4	4.02166e+06	7.34572e+06	2.26291e+06	3.05255e+06	1.04873e+06	6.338e+06	3.0751e+06	3.01024e+06	3.11052e+06	2.51401e+06	3.06e+06	3.84988e+06	2.25935e+06	2.30391e+06
PC(44:8)	PC	M+H	886.632	12.3695	C52 H89 O8 N1 P1	7.62618e+06	144150	6.76213e+06	8.24143e+06	2.39838e+06	5.90906e+06	797427	1.00151e+07	3.55799e+06	3.47872e+06	8.13846e+06	9.86842e+06	4.39086e+06	3.42946e+06	2.90612e+06	5.69037e+06
PC(44:9)	PC	M+H	884.616	11.7849	C52 H87 O8 N1 P1	2.40708e+07	371643	1.6368e+07	1.96558e+07	3.46764e+06	1.52825e+06	325385	1.77013e+07	9.43554e+06	1.49726e+07	15241699	1.50965e+07	1.27851e+07	8.32423e+06	1.04001e+07	1.1838e+07
PC(45:1)	PC	M+H	914.757	18.6674	C53 H105 O8 N1 P1	1.08639e+06	1589.33	1.18745e+06	1.22517e+06	4.84176e+06	3.93673e+06	779131	2.83492e+06	195189	479894	519757	466408	1.02851e+06	1.40413e+06	1.08553e+06	756264
PC(45:2)	PC	M+H	912.742	17.9633	C53 H103 O8 N1 P1	3.38081e+06	61134.3	3.80707e+06	3.7351e+06	9.33822e+06	8.3848e+06	1.42626e+06	8.75195e+06	1.95767e+06	2.72604e+06	1.68694e+06	1.64609e+06	2.90286e+06	3.58565e+06	2.60083e+06	2.65878e+06
PC(45:3)	PC	M+H	910.726	17.2988	C53 H101 O8 N1 P1	975223	1048.79	983073	988840	2.94422e+06	2.39203e+06	398744	3.63883e+06	843565	1.16345e+06	700631	649245	926843	1.08539e+06	892570	925163
PC(45:5)	PC	M+H	906.695	16.293	C53 H97 O8 N1 P1	671738	0	725380	939280	586638	551413	33050.7	3.33863e+06	420303	498222	205516	282254	741489	495742	694836	359605
PC(46:1)	PC	M+H	928.773	18.9264	C54 H107 O8 N1 P1	5.14713e+06	32234.2	5.80927e+06	5.27987e+06	2.22224e+07	1.96212e+07	4.56216e+06	1.72885e+07	2.60824e+06	3.58216e+06	2.75513e+06	2.57125e+06	5.98983e+06	6.42079e+06	4.57194e+06	5.19722e+06
PC(46:3)	PC	M+H	924.742	17.6469	C54 H103 O8 N1 P1	3.98303e+06	36585.9	4.99725e+06	4.97565e+06	1.57984e+07	1.37775e+07	2.55401e+06	1.44825e+07	5.43556e+06	6.86843e+06	4.33124e+06	3.99057e+06	4.70888e+06	5.70581e+06	4.35159e+06	4.78398e+06
PC(46:4)	PC	M+H	922.726	17.431	C54 H101 O8 N1 P1	504091	2546.07	374225	382828	804755	661864	170028	1.10072e+06	329577	507248	289272	267782	491195	295457	441731	430797
PC(46:5)	PC	M+H	920.71	16.7828	C54 H99 O8 N1 P1	1.47992e+07	272610	1.52508e+07	1.5892e+07	1.29946e+07	1.11888e+07	2.03949e+06	2.05522e+07	8.03381e+06	1.03106e+07	6.66471e+06	6.516e+06	8.18698e+06	9.24829e+06	6.67422e+06	6.79776e+06
PC(46:6)	PC	M+H	918.695	15.3254	C54 H97 O8 N1 P1	5.80956e+06	116118	6.47559e+06	7.29351e+06	9.67799e+06	8.11022e+06	1.43985e+06	1.05029e+07	9.95804e+06	1.36501e+07	6.45915e+06	7.80667e+06	5.28037e+06	7.68289e+06	4.93053e+06	4.46487e+06
PC(46:7)	PC	M+H	916.679	15.3365	C54 H95 O8 N1 P1	4.55362e+06	81612.2	4.83744e+06	5.61634e+06	4.16374e+06	3.40175e+06	512974	4.50882e+06	1.66357e+06	2.20324e+06	1.17182e+06	1.23637e+06	2.13983e+06	2.69762e+06	2.08339e+06	2.05747e+06
PC(46:8)	PC	M+H	914.663	13.8667	C54 H93 O8 N1 P1	1.91633e+06	3069.84	1.78887e+06	2.41321e+06	805232	682961	93863.7	3.13742e+06	3.55657e+06	4.16277e+06	3.05605e+06	3.37426e+06	2.01681e+06	1.92269e+06	2.19829e+06	2.03034e+06
PC(47:2)	PC	M+H	940.773	18.569	C55 H107 O8 N1 P1	463745	0	570643	532092	3.93563e+06	3.25931e+06	641270	3.06228e+06	783217	1.06882e+06	789625	666486	910262	1.07576e+06	854039	794419
PC(48:1)	PC	M+H	956.804	19.405	C56 H111 O8 N1 P1	958540	108805	1.45432e+06	821157	4.33168e+06	3.83892e+06	1.26414e+06	3.45177e+06	1.8141e+06	1.73851e+06	2.08499e+06	1.91012e+06	1.44855e+06	1.63867e+06	1.4488e+06	1.32348e+06
PC(48:2)	PC	M+H	954.789	18.8316	C56 H109 O8 N1 P1	1.79497e+06	11614.8	2.62877e+06	2.10831e+06	1.0217e+07	8.63477e+06	2.14707e+06	7.64854e+06	2.35604e+06	2.72766e+06	2.39596e+06	1.6358e+06	2.81174e+06	2.8491e+06	2.55259e+06	2.35379e+06
PC(48:3)	PC	M+H	952.773	18.3072	C56 H107 O8 N1 P1	636737	0	810059	669876	7.23954e+06	6.15411e+06	1.11548e+06	7.37098e+06	2.23376e+06	2.95717e+06	2.04153e+06	1.85555e+06	1.98948e+06	2.39742e+06	1.89886e+06	1.92649e+06
PC(48:4)	PC	M+H	950.757	17.772	C56 H105 O8 N1 P1	620000	1788.8	24681.8	597823	1.61482e+06	2.75184e+06	901889	1.36099e+06	1.39935e+06	780692	1.24824e+06	1.07206e+06	1.07145e+06	1.30711e+06	280528	398550
PC(48:5)	PC	M+H	948.742	17.5965	C56 H103 O8 N1 P1	1.90927e+06	0.01	3.1461e+06	3.84734e+06	3.57334e+06	2.96194e+06	1.352e+06	4.41006e+06	1.80888e+06	2.40381e+06	1.43067e+06	1.33969e+06	1.58214e+06	1.90023e+06	1.38927e+06	1.39063e+06
PC(48:6)	PC	M+H	946.726	16.7476	C56 H101 O8 N1 P1	2.44083e+06	15503	2.57561e+06	2.74241e+06	1.64476e+06	1.50122e+06	240145	2.52175e+06	1.05842e+06	1.82838e+06	1.20556e+06	662024	1.26992e+06	1.48962e+06	907549	1.17755e+06
PC(48:7)	PC	M+H	944.71	16.4463	C56 H99 O8 N1 P1	6.75562e+06	27306	5.62819e+06	5.51173e+06	5.6188e+06	4.50861e+06	1.05746e+06	7.73598e+06	1.90746e+06	2.49487e+06	1.67924e+06	1.48393e+06	3.03034e+06	3.28928e+06	2.7127e+06	2.2835e+06
PC(49:7)	PC	M+H	958.726	15.9837	C57 H101 O8 N1 P1	0	0	0	0	1.82624e+06	1.5244e+06	227835	1.52106e+06	709972	862593	668567	415505	459709	561657	298798	502913
PC(50:2)	PC	M+H	982.82	19.3199	C58 H113 O8 N1 P1	644226	0	618037	453951	3.51217e+06	3.21572e+06	788782	2.6147e+06	1.24418e+06	1.36799e+06	1.2121e+06	1.11502e+06	1.15278e+06	1.15822e+06	1.00409e+06	1.03346e+06
PC(50:3)	PC	M+H	980.804	18.8533	C58 H111 O8 N1 P1	50443.6	0	383684	323569	1.94256e+06	1.92207e+06	168634	2.07172e+06	618685	901903	642365	618881	727010	713437	567588	162539
PC(50:4)	PC	M+H	978.789	18.372	C58 H109 O8 N1 P1	152078	0	158109	28834.7	1.40401e+06	905579	232251	1.68026e+06	578964	812243	554740	493432	470536	431216	480972	457829
PC(50:5)	PC	M+H	976.773	17.7772	C58 H107 O8 N1 P1	190316	0	205596	221956	4.49464e+06	3.81754e+06	547966	4.28898e+06	2.92033e+06	4.09865e+06	2.14178e+06	1.86984e+06	1.78736e+06	1.72615e+06	1.73841e+06	1.3929e+06
PC(50:6)	PC	M+H	974.757	17.1742	C58 H105 O8 N1 P1	411736	17674.7	2.25236e+06	449841	2.25126e+07	1.79585e+07	3.40764e+06	1.72487e+07	1.34016e+07	1.81651e+07	1.12501e+07	9.00497e+06	8.10749e+06	8.34136e+06	8.34925e+06	8.1654e+06
PC(52:5)	PC	M+H	1004.8	18.3891	C60 H111 O8 N1 P1	116135	2719.55	138255	120955	1.47279e+06	1.31423e+06	233688	2.05898e+06	465797	689636	429145	378626	443646	524457	420776	419593
PC(52:6)	PC	M+H	1002.79	17.9004	C60 H109 O8 N1 P1	70738.2	0	235136	383577	9.90036e+06	9.15884e+06	1.70981e+06	9.31245e+06	2.94265e+06	4.5043e+06	2.6974e+06	2.40162e+06	2.6521e+06	3.36801e+06	2.64877e+06	2.51758e+06
PC(54:7)	PC	M+H	1028.8	17.9703	C62 H111 O8 N1 P1	13437.1	0	5236.05	15327	4.49749e+06	3.87262e+06	660766	2.98981e+06	975308	1.42269e+06	905221	849540	937390	1.1877e+06	879714	921377
PE(28:0)	PE	M+H	636.46	10.766	C33 H67 O8 N1 P1	768503	1602.82	523769	694668	99740.2	85562	12622.3	393888	27456.7	65448.9	48723.4	45089.2	215747	182889	191539	214372
PE(12:0p_16:0)	PE	M+H	620.465	11.537	C33 H67 O7 N1 P1	0	0	0	0	214331	164389	9575.59	2.04162e+06	39787	17853.7	17583	31905	148375	128739	143752	114965
PE(16:1_14:0)	PE	M+H	662.476	10.9102	C35 H69 O8 N1 P1	5.44719e+06	73809.5	3.66173e+06	4.56406e+06	944373	781154	210616	1.448e+06	348434	557350	448332	432586	1.5192e+06	1.04139e+06	1.39411e+06	1.51911e+06
PE(31:0)	PE	M+H	678.507	12.6792	C36 H73 O8 N1 P1	2.731e+06	12410	1.72288e+06	2.46768e+06	0.255	65336.1	31727	128715	41057.5	19463.1	41186.1	26647.7	480701	465160	682018	505303
PE(31:1)	PE	M+H	676.491	11.6372	C36 H71 O8 N1 P1	1.66872e+06	4727.33	1.19302e+06	1.49142e+06	310636	320048	12690.8	1.05159e+06	156418	263220	249360	213207	623114	479203	531214	606715
PE(32:0)	PE	M+Na	714.504	11.564	C37 H74 O8 N1 P1 Na1	317235	0	101588	34229.2	106184	59435.7	59792.2	144684	15010.8	50941.2	119169	51177.2	186071	57621.9	139792	76601.7
PE(16:0_16:0)	PE	M+H	692.522	13.6626	C37 H75 O8 N1 P1	1.02161e+07	457198	1.18689e+07	1.86931e+07	8.93114e+06	7.07879e+06	1.92874e+06	1.33789e+07	6.08479e+06	8.99505e+06	6.28126e+06	5.16117e+06	4.72962e+06	7.45726e+06	8.84808e+06	8.48006e+06
PE(16:0p_16:0)	PE	M+H	676.528	14.3726	C37 H75 O7 N1 P1	5.99431e+06	110865	4.53658e+06	5.00908e+06	4.02439e+07	3.31738e+07	8.25726e+06	7.18311e+07	1.50453e+07	2.12035e+07	1.37748e+07	1.23509e+07	1.68319e+07	1.94515e+07	1.45163e+07	1.59666e+07
PE(18:1_14:0)	PE	M+Na	712.489	10.921	C37 H72 O8 N1 P1 Na1	5.77647e+06	83713.9	3.59766e+06	4.27797e+06	1.13713e+06	918708	272600	2.29515e+06	654084	1.07862e+06	856658	861849	1.85002e+06	1.36972e+06	1.6037e+06	1.73492e+06
PE(16:1e_16:0)	PE	M+Na	698.51	14.3915	C37 H74 O7 N1 P1 Na1	482176	1689.68	392315	466134	2.35625e+06	1.88736e+06	842461	3.86044e+06	1.00097e+06	1.41721e+06	897823	787052	1.41403e+06	1.40135e+06	1.2393e+06	1.26626e+06
PE(16:0p_16:1)	PE	M+H	674.512	13.0584	C37 H73 O7 N1 P1	4.25416e+06	38501	3.27754e+06	4.61885e+06	2.56693e+07	2.18902e+07	7.4068e+06	1.8864e+07	7.93486e+06	1.06657e+07	3.5878e+06	7.00609e+06	1.00171e+07	8.53339e+06	1.01121e+07	8.74204e+06
PE(32:2)	PE	M+Na	710.473	11.0253	C37 H70 O8 N1 P1 Na1	1.83124e+06	27130.1	1.38336e+06	1.43266e+06	574664	516233	94357.8	482254	156807	109934	182334	23547	551135	624606	583580	589376
PE(16:0_17:0)	PE	M+H	706.538	14.0462	C38 H77 O8 N1 P1	1.10148e+07	278736	7.33985e+06	1.03337e+07	705341	489826	122919	1.88397e+06	527993	815180	105605	461529	2.40124e+06	2.63162e+06	2.73633e+06	2.13593e+06
PE(18:0p_15:0)	PE	M+H	690.543	15.0465	C38 H77 O7 N1 P1	61997.7	0	55844.6	71758.1	2.91376e+06	2.42828e+06	506427	6.00938e+06	1.88463e+06	3.14411e+06	1.62489e+06	1.62306e+06	1.4394e+06	1.72031e+06	1.44743e+06	1.21503e+06
PE(16:0p_17:1)	PE	M+H	688.528	13.7388	C38 H75 O7 N1 P1	538131	8271.28	686206	170250	1.28808e+07	1.01684e+07	2.68193e+06	1.07015e+07	5.30223e+06	8.07748e+06	5.07479e+06	4.67751e+06	5.17128e+06	4.54665e+06	4.7727e+06	4.51478e+06
PE(18:0_16:0)	PE	M+H	720.554	14.9792	C39 H79 O8 N1 P1	1.39344e+07	399073	1.54927e+07	1.95666e+07	1.37812e+07	1.14884e+07	2.42753e+06	2.07719e+07	9.23183e+06	1.46678e+07	7.84154e+06	6.65895e+06	8.3865e+06	1.12597e+07	9.2264e+06	8.19203e+06
PE(34:0)	PE	M+Na	742.536	14.9792	C39 H78 O8 N1 P1 Na1	798080	33688.3	886241	1.10022e+06	22906.6	79542.5	50611.7	438883	237379	228102	174056	175605	335757	389891	363642	335021
PE(18:0p_16:0)	PE	M+H	704.559	15.6414	C39 H79 O7 N1 P1	2.0164e+06	28489.9	2.01888e+06	2.26437e+06	5.51147e+07	4.56267e+07	8.9516e+06	7.68346e+07	2.80034e+07	4.43882e+07	2.48435e+07	2.27568e+07	2.0675e+07	2.60223e+07	2.39138e+07	2.32936e+07
PE(34:1)	PE	M+Na	740.52	13.7456	C39 H76 O8 N1 P1 Na1	1.03293e+07	2.13118e+06	1.13398e+07	1.79066e+07	1.50223e+07	1.31181e+07	7.19543e+06	1.27742e+07	1.14818e+07	1.29502e+07	9.87268e+06	9.9352e+06	9.60779e+06	1.18034e+07	1.22241e+07	1.29836e+07
PE(16:0e_18:1)	PE	M+H	704.559	14.414	C39 H79 O7 N1 P1	2.56947e+06	10656.6	1.71989e+06	1.03637e+06	5.90336e+07	4.92224e+07	1.25121e+07	4.67004e+07	2.94745e+07	4.55247e+07	2.76876e+07	2.13561e+07	1.99884e+07	2.32826e+07	1.2641e+07	2.00704e+07
PE(16:0p_18:1)	PE	M+H	702.543	14.4058	C39 H77 O7 N1 P1	2.73401e+07	630967	2.0326e+07	2.32887e+07	5.95404e+08	4.19273e+08	1.06375e+08	4.26197e+08	2.3611e+08	3.29401e+08	2.15375e+08	1.9542e+08	1.48009e+08	2.14677e+08	1.5813e+08	1.69688e+08
PE(16:1_18:1)	PE	M+Na	738.504	11.0275	C39 H74 O8 N1 P1 Na1	3.16899e+07	337076	1.79881e+07	2.195e+07	8.67011e+06	7.00337e+06	1.92511e+06	1.31475e+07	5.13276e+06	8.07803e+06	6.62162e+06	5.9119e+06	9.98413e+06	8.07699e+06	8.72103e+06	8.9683e+06
PE(16:0_18:2)	PE	M+Na	738.504	11.3619	C39 H74 O8 N1 P1 Na1	6.58367e+07	990773	3.94244e+07	5.18706e+07	7.28202e+06	9.43299e+06	1.80758e+06	1.09963e+07	1.82911e+06	3.41718e+06	2.57811e+06	2.79788e+06	1.94139e+07	1.31453e+07	1.62829e+07	1.59026e+07
PE(34:2)	PE	M+Na	738.504	12.4338	C39 H74 O8 N1 P1 Na1	1.37909e+07	1.07042e+06	1.13195e+07	1.40228e+07	5.76643e+06	5.04666e+06	3.53982e+06	4.29541e+06	3.10816e+06	3.48689e+06	3.10382e+06	3.5403e+06	5.41396e+06	5.945e+06	7.21866e+06	7.10718e+06
PE(18:2e_16:0)	PE	M+Na	724.525	14.4247	C39 H76 O7 N1 P1 Na1	2.32349e+06	90251.6	1.47691e+06	1.61866e+06	3.51712e+07	3.21075e+07	1.20576e+07	2.83496e+07	2.02174e+07	2.47825e+07	1.87296e+07	1.76988e+07	1.59648e+07	1.33507e+07	1.53257e+07	1.45506e+07
PE(18:1p_16:1)	PE	M+H	700.528	13.1022	C39 H75 O7 N1 P1	1.63173e+06	0	1.05344e+06	1.86828e+06	7.14695e+06	5.96369e+06	1.67202e+06	7.07821e+06	3.02959e+06	4.47542e+06	833495	3.01952e+06	3.50668e+06	2.46159e+06	3.07566e+06	2.95582e+06
PE(16:0p_18:2)	PE	M+H	700.528	13.439	C39 H75 O7 N1 P1	16150.9	0	7658.27	0	630251	1.33753e+06	1.32087e+06	843133	832660	1.69554e+06	909565	1.66619e+06	1.52727e+06	1.75964e+06	1.97415e+06	2.21612e+06
PE(16:1_18:2)	PE	M+H	714.507	11.5501	C39 H73 O8 N1 P1	1.14075e+07	106128	3.84947e+06	8.44116e+06	6.84071e+06	5.50313e+06	1.51254e+06	1.4499e+07	3.38904e+06	4.85819e+06	4.57545e+06	3.60296e+06	6.06595e+06	3.75281e+06	5.56357e+06	5.05055e+06
PE(14:0_20:4)	PE	M+H	712.491	10.9159	C39 H71 O8 N1 P1	6.96674e+06	66573.6	4.17188e+06	5.20551e+06	1.14817e+06	962957	273447	2.5049e+06	662607	1.09567e+06	932309	859372	1.66796e+06	1.31104e+06	1.74473e+06	1.92065e+06
PE(14:0p_20:4)	PE	M+H	696.496	11.5582	C39 H71 O7 N1 P1	2.47694e+06	21313	2.15604e+06	2.62417e+06	583161	517168	57037.2	2.21855e+06	497119	922771	753314	761861	1.16326e+06	926817	1.12935e+06	1.1878e+06
PE(14:0_20:5)	PE	M+H	710.476	9.93731	C39 H69 O8 N1 P1	1.096e+06	0	626568	756717	11439.1	18455.3	0	110863	0	0	0	0	227883	137233	187712	183799
PE(18:0_17:0)	PE	M+Na	756.551	14.0837	C40 H80 O8 N1 P1 Na1	3.35698e+06	34466.9	2.60168e+06	3.12757e+06	638669	708623	265812	1.53702e+06	1.1728e+06	919614	659671	598129	1.0907e+06	868292	874816	601937
PE(18:0p_17:0)	PE	M+H	718.575	16.017	C40 H81 O7 N1 P1	0	0	0	0	1.63363e+06	1.28542e+06	209577	1.64631e+06	500477	918461	474269	414310	439412	492256	253268	157546
PE(35:1)	PE	M+Na	754.536	14.4053	C40 H78 O8 N1 P1 Na1	6.16961e+06	182978	4.87103e+06	5.68565e+06	6.41796e+06	5.18102e+06	1.45059e+06	6.37575e+06	3.82729e+06	5.55869e+06	3.47667e+06	3.73867e+06	3.84052e+06	1.38669e+06	3.15476e+06	3.46426e+06
PE(16:0p_19:1)	PE	M+H	716.559	15.0527	C40 H79 O7 N1 P1	760534	8558.39	798497	1.16383e+06	2.52966e+07	2.18171e+07	4.62906e+06	2.44408e+07	1.18547e+07	1.79855e+07	1.02342e+07	9.43244e+06	9.05112e+06	1.03653e+07	8.47751e+06	8.10003e+06
PE(35:2)	PE	M+Na	752.52	13.1049	C40 H76 O8 N1 P1 Na1	4.24638e+06	100881	3.31776e+06	4.27223e+06	2.92512e+06	2.88183e+06	1.23591e+06	4.892e+06	539576	3.37104e+06	672623	424145	1.05595e+06	2.25296e+06	1.33506e+06	2.68332e+06
PE(18:1p_17:1)	PE	M+H	714.543	13.773	C40 H77 O7 N1 P1	213929	0	49216.2	195033	5.10541e+06	4.3884e+06	1.10369e+06	4.62386e+06	2.40955e+06	3.75522e+06	2.13277e+06	2.1327e+06	2.29593e+06	1.85779e+06	1.87296e+06	1.84828e+06
PE(17:0_18:3)	PE	M+Na	750.504	11.199	C40 H74 O8 N1 P1 Na1	4.34295e+06	12275.1	2.63317e+06	3.84534e+06	446334	422311	115099	1.30419e+06	494751	639314	699207	618001	1.83704e+06	1.11773e+06	1.49842e+06	1.66718e+06
PE(15:0_20:4)	PE	M+H	726.507	11.6386	C40 H73 O8 N1 P1	2.2184e+06	8869.85	1.34408e+06	1.50397e+06	141043	316334	112485	762817	217185	403692	231798	97006	556107	422399	522715	511769
PE(18:0_18:0)	PE	M+Na	770.567	14.2746	C41 H82 O8 N1 P1 Na1	7.40878e+07	1.325e+06	5.60395e+07	6.94231e+07	3.39158e+07	2.75631e+07	6.49126e+06	5.92771e+07	3.37788e+07	3.94975e+07	2.14198e+07	2.24517e+07	2.96624e+07	3.58543e+07	3.10034e+07	3.61804e+07
PE(20:0p_16:0)	PE	M+H	732.59	16.7663	C41 H83 O7 N1 P1	927615	699.29	716311	872682	6.5213e+06	5.32193e+06	1.16415e+06	8.68803e+06	1.87111e+06	3.30899e+06	2.02926e+06	1.88473e+06	2.28622e+06	2.46183e+06	2.18697e+06	2.35691e+06
PE(36:1)	PE	M+Na	768.551	15.0392	C41 H80 O8 N1 P1 Na1	2.41326e+07	2.31034e+06	4.10024e+07	5.02632e+07	4.26637e+07	3.80863e+07	1.33122e+07	4.23418e+07	2.86328e+07	3.67201e+07	2.34418e+07	2.26093e+07	2.90911e+07	3.31102e+07	3.02723e+07	2.66036e+07
PE(36:1e)	PE	M+Na	754.572	14.183	C41 H82 O7 N1 P1 Na1	109055	6012.97	165697	128262	1.49248e+06	1.17762e+06	852598	3.38367e+06	3.93989e+06	5.29378e+06	3.15115e+06	4.01252e+06	2.03049e+06	2.19369e+06	481593	1.83529e+06
PE(18:0e_18:1)	PE	M+Na	754.572	14.56	C41 H82 O7 N1 P1 Na1	115975	840.578	64331.8	102340	7.91644e+06	6.80982e+06	1.44542e+06	5.03253e+06	7.05561e+06	9.85009e+06	5.28548e+06	5.64762e+06	3.12351e+06	3.25301e+06	3.31292e+06	3.63566e+06
PE(18:0p_18:1)	PE	M+H	730.575	15.6618	C41 H81 O7 N1 P1	8.01236e+06	154299	7.9562e+06	8.84473e+06	2.46227e+08	2.07732e+08	4.06872e+07	1.63296e+08	8.97885e+07	1.39835e+08	7.74714e+07	7.08083e+07	6.69265e+07	8.44823e+07	7.45525e+07	7.41858e+07
PE(18:1_18:1)	PE	M+H	744.554	13.7895	C41 H79 O8 N1 P1	1.22022e+09	4.39709e+07	9.82893e+08	1.49921e+09	6.87365e+08	5.48541e+08	1.5393e+08	8.40707e+08	3.88081e+08	5.5494e+08	3.75546e+08	3.48549e+08	3.48687e+08	5.91912e+08	6.28254e+08	6.14448e+08
PE(36:2)	PE	M+Na	766.536	13.7895	C41 H78 O8 N1 P1 Na1	2.30011e+07	5.17928e+06	3.74442e+07	5.03854e+07	3.03341e+07	2.66693e+07	1.38727e+07	3.24016e+07	2.2809e+07	2.59014e+07	2.00121e+07	2.08268e+07	1.71825e+07	2.98625e+07	2.99453e+07	2.10527e+07
PE(18:0_18:2)	PE	M+H	744.554	14.489	C41 H79 O8 N1 P1	1.30534e+06	138758	1.54089e+06	3.09584e+06	803066	3.01353e+06	207884	1.23097e+06	914328	2.78047e+06	509746	404499	949432	226339	1.06335e+06	852552
PE(18:1p_18:1)	PE	M+H	728.559	14.3898	C41 H79 O7 N1 P1	1.06055e+07	137795	8.2534e+06	9.08919e+06	9.04509e+07	7.67393e+07	1.79966e+07	7.14244e+07	4.32514e+07	6.49674e+07	3.85811e+07	3.5176e+07	1.43439e+07	3.8302e+07	3.0503e+07	2.85432e+07
PE(18:1_18:2)	PE	M+Na	764.52	12.6701	C41 H76 O8 N1 P1 Na1	6.32747e+06	428850	5.69043e+06	6.44472e+06	4.87155e+06	4.49669e+06	2.39037e+06	4.88116e+06	4.25552e+06	5.6093e+06	4.6037e+06	3.15712e+06	4.58612e+06	4.9405e+06	5.15382e+06	4.57414e+06
PE(18:1p_18:2)	PE	M+H	726.543	13.2333	C41 H77 O7 N1 P1	12205.7	5213.23	66287.3	123645	6.80207e+06	4.93385e+06	1.58443e+06	6.60951e+06	5.46363e+06	7.8538e+06	4.92482e+06	5.08506e+06	3.41789e+06	2.68685e+06	2.39225e+06	3.893e+06
PE(16:0p_20:3)	PE	M+H	726.543	14.0449	C41 H77 O7 N1 P1	1.08509e+06	5869.43	871557	990491	1.04777e+07	8.61863e+06	1.95269e+06	7.82866e+06	3.17069e+06	4.45155e+06	2.24978e+06	2.29058e+06	2.8348e+06	3.28593e+06	3.49863e+06	2.65209e+06
PE(36:4)	PE	M+Na	762.504	12.3476	C41 H74 O8 N1 P1 Na1	5.49392e+06	553709	3.35696e+06	5.21744e+06	2.1516e+06	1.63318e+06	689161	1.12935e+06	2.96665e+06	2.15435e+06	3.25751e+06	3.67729e+06	3.59324e+06	2.65357e+06	3.04768e+06	2.88783e+06
PE(16:1e_20:3)	PE	M+H	726.543	13.6077	C41 H77 O7 N1 P1	4.10665e+06	57047.8	3.09447e+06	4.49824e+06	1.31038e+07	1.23392e+07	5.29966e+06	8.81067e+06	6.29985e+06	6.74941e+06	4.87525e+06	3.99912e+06	5.2455e+06	5.60919e+06	6.12145e+06	5.13073e+06
PE(16:0p_20:4)	PE	M+H	724.528	12.9906	C41 H75 O7 N1 P1	3.84612e+07	1.19413e+07	3.71282e+07	4.81817e+07	3.4198e+08	2.60155e+08	8.35342e+07	3.8162e+08	2.21131e+08	3.1541e+08	2.32414e+08	2.15288e+08	1.75885e+08	1.54654e+08	1.80801e+08	1.54614e+08
PE(16:1_20:4)	PE	M+Na	760.489	11.0281	C41 H72 O8 N1 P1 Na1	2.05685e+06	545924	1.61864e+06	1.79138e+06	921399	810094	229066	1.07807e+06	616462	852647	605107	584988	950911	961692	951694	874457
PE(16:0_20:5)	PE	M+Na	760.489	11.3617	C41 H72 O8 N1 P1 Na1	3.69507e+06	43779.7	2.94831e+06	3.09801e+06	538100	420433	138113	554178	243547	283882	361835	304854	1.16904e+06	1.10176e+06	1.10384e+06	1.11604e+06
PE(16:1p_20:4)	PE	M+H	722.512	11.65	C41 H73 O7 N1 P1	747296	4228.31	572129	344121	666337	549725	109495	1.53227e+06	407041	770721	625552	659321	735628	647315	635405	557688
PE(16:0p_20:5)	PE	M+H	722.512	12.0256	C41 H73 O7 N1 P1	3.78623e+06	105168	1.79875e+06	3.91084e+06	3.41738e+07	3.0421e+07	1.18851e+07	3.133e+07	9.47132e+06	1.35228e+07	1.40394e+07	1.05651e+07	1.58255e+07	1.00953e+07	1.44681e+07	1.34213e+07
PE(14:0_22:6)	PE	M+H	736.491	10.4889	C41 H71 O8 N1 P1	3.54263e+06	48931.6	2.22002e+06	2.58855e+06	458476	373293	111726	1.23195e+06	258644	449561	349744	318525	1.04027e+06	735656	975466	931518
PE(19:0_18:1)	PE	M+Na	782.567	14.3664	C42 H82 O8 N1 P1 Na1	1.23232e+07	334489	7.98568e+06	1.01245e+07	4.53026e+06	1.25577e+06	1.16121e+06	7.59459e+06	5.48373e+06	5.98176e+06	3.86953e+06	3.59042e+06	4.90396e+06	6.42366e+06	5.09874e+06	4.74459e+06
PE(37:1)	PE	M+Na	782.567	14.9825	C42 H82 O8 N1 P1 Na1	1.72965e+06	4561.99	1.63398e+06	1.6948e+06	1.5688e+06	1.48651e+06	191074	1.43407e+06	1.60026e+06	1.78109e+06	911856	1.26742e+06	853030	986332	1.0983e+06	699978
PE(18:0p_19:1)	PE	M+H	744.59	16.238	C42 H83 O7 N1 P1	227695	0	261505	274723	8.64782e+06	7.09411e+06	1.46755e+06	8.87743e+06	3.08112e+06	4.98745e+06	2.83081e+06	2.58552e+06	2.74111e+06	3.48985e+06	1.04591e+06	2.5667e+06
PE(18:1p_19:1)	PE	M+H	742.575	14.912	C42 H81 O7 N1 P1	36885.5	0.001	33121.3	34212.3	2.07281e+06	1.78174e+06	317420	1.50392e+06	777813	1.3545e+06	691783	614143	436518	243292	482087	424894
PE(17:1_20:3)	PE	M+Na	776.52	11.2783	C42 H76 O8 N1 P1 Na1	5.0568e+06	0	2.58201e+06	4.06497e+06	3.90798e+06	3.42981e+06	970507	1.27959e+07	2.50288e+06	3.79245e+06	4.32726e+06	4.08059e+06	4.21541e+06	2.73138e+06	3.88287e+06	4.39277e+06
PE(17:0_20:5)	PE	M+H	752.522	12.0793	C42 H75 O8 N1 P1	2.48194e+06	28381.1	1.52959e+06	2.84269e+06	162911	0	49708.9	112196	0	0	37132.3	0	225559	451788	394684	348806
PE(17:1_20:5)	PE	M+H	750.507	10.768	C42 H73 O8 N1 P1	1.23684e+06	826.312	739959	846135	316532	280771	58832	610911	101857	200439	145460	106647	347214	287443	317162	336168
PE(15:0_22:6)	PE	M+H	750.507	11.204	C42 H73 O8 N1 P1	4.34137e+06	14231	2.63271e+06	3.84986e+06	406736	388308	115114	1.61335e+06	496930	635250	703622	624072	1.83703e+06	1.11513e+06	1.49331e+06	1.66416e+06
PE(18:0_20:0)	PE	M+Na	798.598	15.589	C43 H86 O8 N1 P1 Na1	3.75059e+06	25213.6	3.22318e+06	3.76561e+06	5.54896e+06	5.26018e+06	960473	9.21219e+06	3.33616e+06	5.09442e+06	2.95254e+06	2.52057e+06	2.65996e+06	3.29811e+06	3.77217e+06	8.81153e+06
PE(38:0)	PE	M+H	776.616	17.161	C43 H87 O8 N1 P1	213506	0	172813	279771	580790	401987	56207.5	1.13536e+06	336491	595805	323765	312339	280758	314655	285482	294490
PE(18:0p_20:0)	PE	M+H	760.621	17.6253	C43 H87 O7 N1 P1	87005.4	8107.56	215216	57651.5	1.43976e+06	1.47322e+06	220982	1.80088e+06	150191	407686	329576	225367	351207	319720	346407	335896
PE(18:0_20:1)	PE	M+Na	796.583	14.6196	C43 H84 O8 N1 P1 Na1	1.32813e+07	421575	1.15682e+07	1.7275e+07	1.17988e+07	1.01914e+07	3.35219e+06	1.97702e+07	1.26621e+07	1.78795e+07	1.04946e+07	9.4464e+06	9.30506e+06	1.16709e+07	9.43433e+06	5.42757e+06
PE(38:1)	PE	M+Na	796.583	16.2551	C43 H84 O8 N1 P1 Na1	2.35917e+06	19986.2	2.15483e+06	2.76274e+06	3.644e+06	3.14596e+06	801714	4.35716e+06	1.72737e+06	2.81601e+06	1.62407e+06	1.37686e+06	1.73735e+06	2.04472e+06	419120	1.81991e+06
PE(38:1e)	PE	M+Na	782.603	15.4439	C43 H86 O7 N1 P1 Na1	169855	0	108814	72855.3	1.10997e+06	894903	189999	2.33765e+06	2.52161e+06	4.7078e+06	2.22624e+06	2.29817e+06	953815	1.12371e+06	1.0074e+06	936069
PE(18:0p_20:1)	PE	M+H	758.606	16.7389	C43 H85 O7 N1 P1	6.43093e+06	79995.9	5.39974e+06	6.22973e+06	4.85796e+07	4.15128e+07	8.98984e+06	3.59017e+07	1.65904e+07	2.72057e+07	1.63165e+07	1.51691e+07	1.60105e+07	1.78868e+07	1.48002e+07	1.60865e+07
PE(38:2)	PE	M+Na	794.567	14.9791	C43 H82 O8 N1 P1 Na1	1.20423e+07	443449	1.20715e+07	1.58228e+07	4.38715e+06	5.07639e+06	1.38431e+06	5.38394e+06	4.72494e+06	5.52139e+06	4.00099e+06	2.79601e+06	4.80881e+06	6.88174e+06	5.90373e+06	4.64734e+06
PE(38:2e)	PE	M+Na	780.588	14.535	C43 H84 O7 N1 P1 Na1	100405	14957.6	17468.7	81324.5	1.63203e+06	1.49154e+06	605461	803923	3.16495e+06	5.70904e+06	1.70764e+06	1.64467e+06	951486	924211	780529	112568
PE(16:0e_22:2)	PE	M+Na	780.588	15.591	C43 H84 O7 N1 P1 Na1	7.8267e+06	113298	8.15783e+06	9.37015e+06	6.1448e+06	5.01033e+06	1.03423e+06	4.99797e+06	5.10714e+06	9.10376e+06	4.31218e+06	4.27658e+06	4.06916e+06	4.87805e+06	4.35992e+06	4.14751e+06
PE(18:1p_20:1)	PE	M+H	756.59	15.5757	C43 H83 O7 N1 P1	705670	8306.25	654545	888289	1.74729e+07	1.57125e+07	1.95386e+06	1.57472e+07	6.25459e+06	9.59183e+06	9.84062e+06	4.78582e+06	3.28944e+06	4.38289e+06	4.07887e+06	6.32887e+06
PE(16:0p_22:3)	PE	M+H	754.575	14.9657	C43 H81 O7 N1 P1	1.5801e+06	4927.07	1.51742e+06	1.8796e+06	2.36135e+07	2.04406e+07	4.212e+06	1.23166e+07	1.63909e+07	2.38893e+07	1.22984e+07	1.18682e+07	8.87179e+06	1.05651e+07	9.38215e+06	8.13565e+06
PE(18:0p_20:3)	PE	M+H	754.575	15.3263	C43 H81 O7 N1 P1	276455	0	330053	358625	5.9761e+06	5.89337e+06	917973	4.32274e+06	1.94106e+06	3.15564e+06	1.69823e+06	1.67893e+06	1.70693e+06	2.05353e+06	1.73507e+06	1.8158e+06
PE(18:1_20:3)	PE	M+Na	790.536	11.9703	C43 H78 O8 N1 P1 Na1	9.44274e+07	4.06519e+06	6.64733e+07	1.07804e+08	4.10223e+07	3.54694e+07	1.46105e+07	8.17096e+07	3.22064e+07	4.54961e+07	4.58858e+07	3.8893e+07	6.66558e+07	4.49656e+07	5.65632e+07	5.09881e+07
PE(38:4)	PE	M+Na	790.536	12.9989	C43 H78 O8 N1 P1 Na1	6.97544e+06	263515	4.55066e+06	6.85917e+06	1.36694e+06	839653	448762	430672	99558.7	339621	1.33897e+06	1.53025e+06	1.477e+06	1.2778e+06	1.48322e+06	1.23272e+06
PE(18:0_20:4)	PE	M+Na	790.536	13.7224	C43 H78 O8 N1 P1 Na1	1.61722e+07	2.55107e+06	1.48459e+07	2.3375e+07	1.66318e+07	1.31891e+07	4.79834e+06	1.57919e+07	2.02082e+07	1.82214e+07	2.01814e+07	1.35582e+07	1.80074e+07	1.61747e+07	1.8484e+07	1.71946e+07
PE(18:1p_20:3)	PE	M+H	752.559	13.6574	C43 H79 O7 N1 P1	442494	64940.7	384995	548320	520350	64564.8	100146	430815	67066.5	117427	203284	253732	158897	294884	113343	381312
PE(16:0p_22:4)	PE	M+H	752.559	13.9614	C43 H79 O7 N1 P1	2.54546e+06	1.17864e+06	1.99749e+06	2.34495e+06	3.98848e+07	3.13469e+07	9.80726e+06	6.63834e+07	8.94608e+07	1.2509e+08	7.71554e+07	6.00903e+07	4.8166e+07	4.40915e+07	4.23325e+07	3.5747e+07
PE(18:0p_20:4)	PE	M+H	752.559	14.3345	C43 H79 O7 N1 P1	1.6126e+07	375464	1.30663e+07	1.57064e+07	2.05274e+08	1.79468e+08	4.2112e+07	2.20684e+08	1.34555e+08	1.89543e+08	1.1956e+08	1.13806e+08	5.00422e+07	1.05872e+08	7.91874e+07	8.55e+07
PE(20:3_18:2)	PE	M+Na	788.52	10.8782	C43 H76 O8 N1 P1 Na1	2.14097e+06	4846.14	1.23794e+06	1.21243e+06	1.53739e+06	1.56062e+06	350288	5.37284e+06	1.70685e+06	2.69769e+06	2.35023e+06	1.88809e+06	1.86491e+06	1.1857e+06	1.43163e+06	1.82998e+06
PE(18:1_20:4)	PE	M+Na	788.52	12.3985	C43 H76 O8 N1 P1 Na1	1.22625e+07	1.23649e+06	1.31704e+07	1.79e+07	6.4206e+06	5.68671e+06	3.20765e+06	8.23487e+06	8.41636e+06	9.68007e+06	8.76298e+06	9.35826e+06	1.11356e+07	9.61758e+06	1.12656e+07	1.08211e+07
PE(18:0_20:5)	PE	M+Na	788.52	12.7921	C43 H76 O8 N1 P1 Na1	1.16251e+07	458923	9.50742e+06	1.14632e+07	1.09186e+06	1.27323e+06	380657	2.11289e+06	877202	635312	1.42284e+06	1.51102e+06	3.63296e+06	3.87436e+06	3.89507e+06	3.81301e+06
PE(16:0p_22:5)	PE	M+H	750.543	13.0008	C43 H77 O7 N1 P1	1.37569e+07	1.55221e+06	1.79441e+07	2.29506e+07	1.28759e+08	1.07842e+08	2.99018e+07	1.4561e+08	1.24745e+08	1.81117e+08	1.22233e+08	1.14661e+08	8.78618e+07	6.91613e+07	8.85867e+07	7.11663e+07
PE(18:0p_20:5)	PE	M+H	750.543	13.4577	C43 H77 O7 N1 P1	116278	303942	733879	257727	2.76599e+07	2.20062e+07	8.03325e+06	3.27663e+07	1.58238e+07	2.28934e+07	1.434e+07	1.55799e+07	1.38436e+07	1.09061e+07	1.18031e+07	1.24236e+07
PE(16:0_22:6)	PE	M+H	764.522	11.9265	C43 H75 O8 N1 P1	4.9201e+07	1.98095e+06	3.58963e+07	5.62975e+07	1.75387e+07	1.51011e+07	4.84768e+06	3.57599e+07	1.2713e+07	1.96127e+07	1.69581e+07	1.57716e+07	3.10962e+07	2.13111e+07	2.60313e+07	1.86583e+07
PE(18:1p_20:5)	PE	M+H	748.528	12.0453	C43 H75 O7 N1 P1	1.69706e+06	11122.8	299020	2.0793e+06	9.27292e+06	7.937e+06	378530	5.99211e+06	3.01524e+06	3.27534e+06	3.27866e+06	3.22388e+06	4.84789e+06	2.88846e+06	4.12719e+06	3.96697e+06
PE(16:0p_22:6)	PE	M+H	748.528	12.5365	C43 H75 O7 N1 P1	6.60965e+06	166851	5.4834e+06	9.46234e+06	2.98411e+08	2.57943e+08	8.66728e+07	2.56821e+08	2.03041e+08	2.91316e+08	2.22042e+08	2.49381e+08	1.63162e+08	1.35226e+08	1.472e+08	1.61064e+08
PE(38:7e)	PE	M+Na	770.51	12.5507	C43 H74 O7 N1 P1 Na1	702696	23353.9	640901	692855	1.76448e+07	1.57999e+07	8.44949e+06	1.37459e+07	1.38651e+07	1.63707e+07	1.42698e+07	1.46978e+07	1.19631e+07	1.03444e+07	1.12616e+07	1.13796e+07
PE(16:1p_22:6)	PE	M+H	746.512	11.2057	C43 H73 O7 N1 P1	1.1276e+06	0	932003	1.12436e+06	2.31869e+06	1.98799e+06	756861	3.74658e+06	1.59938e+06	1.93663e+06	2.37625e+06	1.83326e+06	2.05382e+06	1.15232e+06	1.97423e+06	1.88647e+06
PE(19:0_20:4)	PE	M+H	782.569	13.4186	C44 H81 O8 N1 P1	5.0537e+07	5.17166e+07	4.42033e+07	5.90498e+07	1.28229e+08	1.10698e+08	1.36048e+08	2.26826e+07	1.24517e+08	2.97646e+07	1.05997e+08	3.39715e+07	1.40521e+08	4.98761e+07	1.2558e+08	1.25468e+08
PE(17:1_22:6)	PE	M+H	776.522	11.2853	C44 H75 O8 N1 P1	5.16629e+06	0	2.64516e+06	4.20083e+06	3.72282e+06	3.32965e+06	976328	1.2295e+07	2.46786e+06	3.20453e+06	3.94663e+06	3.8726e+06	4.06632e+06	2.70851e+06	3.91471e+06	4.11394e+06
PE(18:0_22:0)	PE	M+Na	826.63	16.2552	C45 H90 O8 N1 P1 Na1	3.84825e+06	0.636	3.95254e+06	5.01898e+06	6.2677e+06	5.46717e+06	779056	1.13116e+07	7.43719e+06	1.13697e+07	6.60205e+06	5.76311e+06	4.6017e+06	5.05126e+06	5.71196e+06	3.87859e+06
PE(40:0)	PE	M+H	804.648	17.903	C45 H91 O8 N1 P1	252296	0	219334	324137	684489	569330	48008	1.19632e+06	376383	589029	356794	350154	364896	344390	356942	339579
PE(18:1_22:0)	PE	M+Na	824.614	16.1746	C45 H88 O8 N1 P1 Na1	3.42831e+06	16167	3.19684e+06	4.04767e+06	8.90374e+06	7.65106e+06	1.37947e+06	9.98596e+06	5.45981e+06	9.01422e+06	4.96307e+06	4.30878e+06	4.13927e+06	4.72133e+06	4.47423e+06	3.88856e+06
PE(40:1)	PE	M+Na	824.614	17.1791	C45 H88 O8 N1 P1 Na1	1.06762e+06	7202.25	906839	1.16086e+06	4.26985e+06	3.39169e+06	927296	4.51296e+06	2.38938e+06	3.52035e+06	2.18583e+06	2.11126e+06	1.97305e+06	2.08586e+06	1.94729e+06	1.97084e+06
PE(18:0e_22:1)	PE	M+H	788.653	17.631	C45 H91 O7 N1 P1	349789	392.309	165325	163231	3.48975e+06	2.81577e+06	567755	2.40912e+06	721438	1.46858e+06	1.02392e+06	602674	379325	901880	307717	778289
PE(18:0p_22:1)	PE	M+H	786.637	17.6034	C45 H89 O7 N1 P1	2.25437e+06	2252.9	1.33765e+06	2.10079e+06	1.25772e+07	1.03905e+07	2.11825e+06	9.86975e+06	3.59252e+06	6.33358e+06	3.6292e+06	3.19838e+06	3.68668e+06	3.57834e+06	3.41452e+06	3.30684e+06
PE(40:2)	PE	M+Na	822.598	16.1433	C45 H86 O8 N1 P1 Na1	1.74307e+06	7166.05	1.73536e+06	2.026e+06	3.4677e+06	1.88912e+06	638604	2.98588e+06	3.14514e+06	4.74647e+06	2.56624e+06	2.24813e+06	1.99696e+06	2.16863e+06	1.613e+06	1.99593e+06
PE(18:0p_22:2)	PE	M+H	784.621	16.7524	C45 H87 O7 N1 P1	668433	0	608172	805655	8.47633e+06	4.24227e+06	525379	9.26651e+06	4.31176e+06	7.1942e+06	4.24095e+06	2.75385e+06	3.41526e+06	3.70446e+06	3.10412e+06	3.21237e+06
PE(22:1_18:2)	PE	M+Na	820.583	14.075	C45 H84 O8 N1 P1 Na1	3.45164e+06	10809	2.78765e+06	3.39661e+06	4.87283e+06	3.45846e+06	931157	8.58328e+06	3.05463e+06	4.28484e+06	2.92835e+06	2.42346e+06	1.9582e+06	3.02347e+06	2.42202e+06	1.94524e+06
PE(18:0_22:3)	PE	M+H	798.601	15.5884	C45 H85 O8 N1 P1	3.75059e+06	25213.6	3.22318e+06	3.76561e+06	5.54896e+06	5.26018e+06	960473	9.21219e+06	3.33616e+06	5.09442e+06	2.95254e+06	2.52057e+06	2.65996e+06	3.29811e+06	3.77217e+06	8.81153e+06
PE(18:0p_22:3)	PE	M+H	782.606	16.191	C45 H85 O7 N1 P1	688535	0	742520	778988	3.84137e+06	3.57514e+06	621008	6.20177e+06	5.42071e+06	8.94269e+06	5.09675e+06	4.60841e+06	2.87002e+06	3.21491e+06	2.5828e+06	2.5949e+06
PE(18:1_22:3)	PE	M+Na	818.567	12.8132	C45 H82 O8 N1 P1 Na1	2.52421e+06	19048.8	2.13729e+06	1.4091e+06	5.60701e+06	4.94853e+06	1.23389e+06	1.06437e+07	3.3091e+06	5.35074e+06	4.5979e+06	4.13256e+06	3.77269e+06	3.45192e+06	5.96641e+06	4.36712e+06
PE(20:1_20:3)	PE	M+H	796.585	14.0245	C45 H83 O8 N1 P1	1.1435e+08	4.30995e+06	3.53601e+07	5.53607e+07	4.51661e+07	4.35566e+07	1.47619e+07	5.27148e+07	4.62062e+07	5.14617e+07	3.124e+07	4.48376e+07	4.37245e+07	4.27032e+07	4.78224e+07	4.21274e+07
PE(18:0_22:4)	PE	M+H	796.585	14.6279	C45 H83 O8 N1 P1	1.44212e+07	441330	1.1568e+07	1.72473e+07	1.1645e+07	9.54148e+06	3.34183e+06	2.01259e+07	1.2648e+07	1.78871e+07	1.02771e+07	9.33767e+06	9.24238e+06	1.06187e+07	8.87742e+06	5.62044e+06
PE(18:0e_22:4)	PE	M+H	782.606	15.4475	C45 H85 O7 N1 P1	11907.2	0	146677	30355.3	1.16609e+06	852822	217426	1.96407e+06	2.52572e+06	4.79351e+06	2.24783e+06	2.25813e+06	896600	1.06936e+06	999379	921742
PE(18:1e_22:3)	PE	M+H	782.606	16.0075	C45 H85 O7 N1 P1	109592	0	55498.7	16618.7	2.39777e+06	2.19807e+06	283885	2.80704e+06	2.76938e+06	3.77095e+06	2.33149e+06	1.83091e+06	971855	1.77893e+06	1.30393e+06	872190
PE(18:1p_22:3)	PE	M+H	780.59	14.967	C45 H83 O7 N1 P1	45713.6	727.18	18436.7	31191.2	1.63159e+07	1.4721e+07	2.94588e+06	2.40859e+07	1.91989e+07	2.86082e+07	1.64092e+07	1.51525e+07	8.86435e+06	1.14363e+07	9.46448e+06	7.66875e+06
PE(18:0p_22:4)	PE	M+H	780.59	15.2346	C45 H83 O7 N1 P1	135675	1286.03	94444.2	92871	1.64262e+07	1.37049e+07	2.04013e+06	3.16597e+07	3.79736e+07	6.24174e+07	3.30702e+07	3.40604e+07	1.48728e+07	1.88513e+07	1.45342e+07	1.58098e+07
PE(20:0p_20:4)	PE	M+H	780.59	15.5883	C45 H83 O7 N1 P1	7.85903e+06	113092	8.19645e+06	9.50824e+06	6.01869e+06	4.9727e+06	1.04576e+06	5.01707e+06	4.40591e+06	7.77857e+06	4.27672e+06	3.81414e+06	4.03747e+06	4.67005e+06	4.60938e+06	4.13084e+06
PE(18:0_22:5)	PE	M+H	794.569	14.1662	C45 H81 O8 N1 P1	615209	37683.7	790962	1.71288e+06	1.53528e+06	1.38774e+06	417704	3.11485e+06	573454	1.07246e+06	610383	569144	519655	1.34827e+06	894741	531212
PE(18:0e_22:5)	PE	M+H	780.59	14.5433	C45 H83 O7 N1 P1	50671.7	13259.8	23613.9	12653.4	1.63386e+06	1.27938e+06	460874	1.64512e+06	2.24598e+06	2.31414e+06	1.44275e+06	1.50746e+06	1.04051e+06	762340	1.529e+06	679173
PE(18:1p_22:4)	PE	M+H	778.575	14.0195	C45 H81 O7 N1 P1	656102	73321	770916	1.3777e+06	3.66676e+07	2.72157e+07	7.42591e+06	5.32797e+07	3.63727e+07	5.08752e+07	2.37031e+07	2.36371e+07	1.94422e+07	2.24505e+07	2.06832e+07	1.58479e+07
PE(18:0p_22:5)	PE	M+H	778.575	14.8059	C45 H81 O7 N1 P1	1.23906e+06	301833	856824	1.32151e+06	5.35218e+06	4.56128e+06	1.04529e+06	7.71952e+06	4.74651e+06	7.38578e+06	5.79819e+06	5.14329e+06	2.62337e+06	3.32368e+06	2.38652e+06	2.70153e+06
PE(18:1_22:5)	PE	M+H	792.554	12.4239	C45 H79 O8 N1 P1	9.94222e+07	2.4517e+06	6.84449e+07	1.03382e+08	2.0334e+07	1.59947e+07	6.07624e+06	3.32399e+06	1.89419e+07	2.25992e+07	1.52182e+07	2.47322e+07	2.08194e+07	3.09767e+06	1.52305e+07	1.93076e+07
PE(20:1_20:5)	PE	M+H	792.554	12.7519	C45 H79 O8 N1 P1	1.61127e+07	365387	9.66639e+06	1.29878e+07	444528	132492	135494	136065	3.8339e+06	860600	3.34147e+06	3.70794e+06	3.74509e+06	1.43055e+06	1.68132e+06	987431
PE(18:0_22:6)	PE	M+H	792.554	13.2899	C45 H79 O8 N1 P1	1.09175e+08	5.82619e+06	8.0716e+07	1.41752e+08	6.13769e+07	4.70147e+07	1.80235e+07	1.06785e+08	3.82288e+07	5.30531e+07	2.59833e+07	3.77836e+07	5.47724e+07	5.93491e+07	3.67228e+07	6.695e+07
PE(40:6)	PE	M+Na	814.536	13.2899	C45 H78 O8 N1 P1 Na1	2.22507e+06	640017	1.79454e+06	3.26808e+06	1.99377e+06	1.18939e+06	1.17772e+06	1.84384e+06	1.34755e+06	1.53239e+06	1.33722e+06	1.37331e+06	2.34679e+06	2.06216e+06	2.16437e+06	2.07921e+06
PE(18:0e_22:6)	PE	M+H	778.575	13.62	C45 H81 O7 N1 P1	1.21418e+06	202049	718271	1.43242e+06	4.44025e+06	2.87439e+06	716847	4.32282e+06	1.99012e+06	3.15436e+06	1.85267e+06	1.5569e+06	716449	1.73112e+06	2.08609e+06	1.89596e+06
PE(18:1p_22:5)	PE	M+H	776.559	13.0115	C45 H79 O7 N1 P1	3.86262e+06	1.68135e+06	2.82891e+06	4.64371e+06	8.09994e+06	6.53571e+06	2.93927e+06	1.03484e+07	1.35102e+07	1.54581e+07	4.27918e+06	1.18055e+07	6.55896e+06	5.63484e+06	8.41198e+06	5.39344e+06
PE(18:0p_22:6)	PE	M+H	776.559	13.8964	C45 H79 O7 N1 P1	4.88048e+06	7415.61	3.93015e+06	5.12618e+06	1.70593e+08	1.33879e+08	4.10653e+07	1.70034e+08	1.03999e+08	1.57859e+08	8.54896e+07	1.01111e+08	7.82378e+07	7.68289e+07	7.82246e+07	6.92015e+07
PE(20:3_20:4)	PE	M+H	790.538	11.544	C45 H77 O8 N1 P1	824362	945.821	618800	884071	229180	486069	105269	369022	350438	259185	382238	312325	132852	163607	105291	128900
PE(18:1_22:6)	PE	M+H	790.538	11.9806	C45 H77 O8 N1 P1	9.34226e+07	4.07032e+06	6.47141e+07	1.07904e+08	4.1176e+07	3.52079e+07	9.35413e+06	8.10164e+07	3.18996e+07	4.53158e+07	4.57376e+07	3.85305e+07	6.97923e+07	4.69656e+07	5.59468e+07	5.03942e+07
PE(18:2e_22:5)	PE	M+H	776.559	13.0151	C45 H79 O7 N1 P1	3.85789e+06	1.68135e+06	2.82891e+06	4.64371e+06	8.12956e+06	6.53571e+06	2.93927e+06	1.03804e+07	1.35102e+07	1.54581e+07	4.27918e+06	1.03272e+07	6.55896e+06	5.63484e+06	8.41198e+06	5.39344e+06
PE(40:7e)	PE	M+Na	798.541	13.9184	C45 H78 O7 N1 P1 Na1	224818	0	94599.4	149035	1.08562e+07	9.58431e+06	4.33581e+06	9.51058e+06	7.99896e+06	1.0069e+07	6.71054e+06	7.45504e+06	6.03703e+06	5.94987e+06	5.36994e+06	6.12971e+06
PE(18:1p_22:6)	PE	M+H	774.543	12.5552	C45 H77 O7 N1 P1	3.94768e+06	53500.5	3.10275e+06	3.96386e+06	5.07913e+07	4.25971e+07	1.48115e+07	5.01991e+07	3.79564e+07	5.72013e+07	4.24823e+07	4.36871e+07	2.93984e+07	2.5347e+07	2.0967e+07	3.03512e+07
PE(18:2_22:6)	PE	M+H	788.522	10.9171	C45 H75 O8 N1 P1	2.19059e+06	44471	759653	1.51761e+06	1.931e+06	1.61128e+06	379397	5.28606e+06	529687	2.86849e+06	2.44142e+06	2.14743e+06	460084	1.18343e+06	1.71494e+06	1.83611e+06
PE(40:8e)	PE	M+Na	796.525	12.5616	C45 H76 O7 N1 P1 Na1	734981	278.316	1.00828e+06	1.37408e+06	4.48715e+06	3.73014e+06	2.02468e+06	3.87845e+06	3.75677e+06	3.4272e+06	3.66798e+06	3.79411e+06	3.61519e+06	2.95993e+06	3.30259e+06	3.55584e+06
PE(20:4_21:1)	PE	M+H	808.585	14.3001	C46 H83 O8 N1 P1	4.13341e+06	28041.1	375804	2.65372e+06	1.15351e+06	1.27033e+06	177726	1.77883e+06	1.84275e+06	1.79974e+06	1.00101e+06	984185	1.35877e+06	950753	1.3095e+06	1.29537e+06
PE(19:1_22:6)	PE	M+H	804.554	12.595	C46 H79 O8 N1 P1	3.02459e+06	45899.4	2.46025e+06	3.29479e+06	949667	918318	326817	1.71651e+06	1.01661e+06	945857	1.51482e+06	1.14732e+06	1.11988e+06	654584	890029	1.36905e+06
PE(18:1_24:0)	PE	M+Na	852.645	17.134	C47 H92 O8 N1 P1 Na1	4.05506e+06	48410	3.33191e+06	3.77921e+06	1.4929e+07	1.40188e+07	2.23646e+06	1.76045e+07	5.02117e+06	8.32009e+06	5.00803e+06	4.51105e+06	5.35359e+06	5.6729e+06	4.97298e+06	5.48246e+06
PE(42:1)	PE	M+Na	852.645	17.9282	C47 H92 O8 N1 P1 Na1	1.28275e+06	19248.1	1.10264e+06	1.34214e+06	9.47002e+06	8.1585e+06	2.04377e+06	7.71709e+06	3.69543e+06	5.57262e+06	3.45899e+06	3.31732e+06	3.44662e+06	3.82132e+06	3.35658e+06	3.42435e+06
PE(20:4_22:6)	PE	M+H	812.522	10.523	C47 H75 O8 N1 P1	694325	2090.88	434074	465577	456677	405154	119439	1.3389e+06	396888	675570	476429	494773	502358	346946	436189	419877
PE(18:0p_24:1)	PE	M+H	814.668	18.22	C47 H93 O7 N1 P1	367024	212416	359868	269810	3.38522e+06	2.41865e+06	388555	2.7185e+06	567362	850249	674799	453565	731593	785707	618774	870407
PE(42:2)	PE	M+Na	850.63	17.0952	C47 H90 O8 N1 P1 Na1	573866	1484.6	515043	585893	2.56709e+06	2.37558e+06	559833	3.37109e+06	2.18221e+06	3.0214e+06	1.86898e+06	1.81522e+06	250970	1.05977e+06	912916	968405
PE(20:3_22:1)	PE	M+H	824.616	15.5859	C47 H87 O8 N1 P1	3.47903e+06	52570.1	3.27206e+06	4.29713e+06	1.57591e+06	1.37186e+06	254311	3.12175e+06	1.38026e+06	2.28954e+06	1.18636e+06	1.01892e+06	1.49175e+06	1.9415e+06	1.69894e+06	1.43576e+06
PE(20:0p_22:5)	PE	M+H	806.606	15.5587	C47 H85 O7 N1 P1	2.47115e+06	3506.01	2.36575e+06	2.72911e+06	5.33517e+06	4.52289e+06	890004	6.59005e+06	4.2821e+06	6.77229e+06	3.93399e+06	3.34195e+06	2.818e+06	3.4424e+06	2.91982e+06	2.92517e+06
PE(20:1_22:5)	PE	M+H	820.585	13.4811	C47 H83 O8 N1 P1	2.46952e+07	814772	1.71238e+07	3.08231e+07	3.24919e+06	2.66325e+06	529787	9.79938e+06	7.00261e+06	9.61067e+06	4.89996e+06	3.73113e+06	1.13742e+07	9.2046e+06	8.52931e+06	6.65686e+06
PE(20:5_22:1)	PE	M+H	820.585	14.051	C47 H83 O8 N1 P1	3.39457e+06	85379.9	2.60821e+06	3.47707e+06	5.37719e+06	4.2131e+06	738579	1.98673e+06	3.10952e+06	4.50651e+06	3.30977e+06	2.89467e+06	1.79699e+06	3.00539e+06	2.59087e+06	2.18412e+06
PE(20:0_22:6)	PE	M+H	820.585	14.5847	C47 H83 O8 N1 P1	2.03578e+06	37177.3	1.85801e+06	2.48495e+06	1.32892e+06	2.16971e+06	551863	2.23182e+06	1.32477e+06	2.31573e+06	632691	1.10474e+06	1.13519e+06	1.6862e+06	1.38502e+06	1.49151e+06
PE(20:1p_22:5)	PE	M+H	804.59	14.314	C47 H83 O7 N1 P1	683799	659.866	281369	989098	3.75077e+06	2.18388e+06	369218	2.02587e+06	2.17308e+06	4.11923e+06	2.24994e+06	2.18383e+06	1.45217e+06	1.74442e+06	879605	1.6683e+06
PE(22:3_20:4)	PE	M+Na	840.551	11.377	C47 H80 O8 N1 P1 Na1	797246	2530.68	94569.2	879676	811445	716458	193677	2.7451e+06	973684	1.55331e+06	1.63576e+06	1.52741e+06	1.10388e+06	577537	750526	996369
PE(22:4_22:6)	PE	M+H	840.554	11.2615	C49 H79 O8 N1 P1	2.97927e+06	10790.4	1.53033e+06	2.73754e+06	2.62796e+06	1.89893e+06	78514.3	657399	1.34815e+06	2.23647e+06	2.71423e+06	1.87665e+06	3.06676e+06	1.11736e+06	2.06725e+06	2.13622e+06
PE(26:1_18:1)	PE	M+Na	878.661	17.08	C49 H94 O8 N1 P1 Na1	4.07108e+06	12686.6	3.40664e+06	3.89757e+06	2.95189e+06	2.48705e+06	476801	2.44515e+06	1.78392e+06	2.72853e+06	1.22079e+06	1.45351e+06	1.9027e+06	2.27746e+06	1.99622e+06	1.92889e+06
PE(44:2)	PE	M+Na	878.661	17.8402	C49 H94 O8 N1 P1 Na1	457674	0	361879	434188	1.1411e+06	953812	212474	1.1616e+06	708217	1.14754e+06	679095	623394	541288	601733	494880	515133
PE(24:1_20:4)	PE	M+H	850.632	16.0637	C49 H89 O8 N1 P1	9.29685e+06	139174	1.0136e+07	1.17645e+07	7.62027e+06	6.73877e+06	782984	7.67825e+06	4.32342e+06	7.38696e+06	3.76719e+06	3.62595e+06	4.22342e+06	5.34322e+06	4.57284e+06	3.78904e+06
PE(44:5)	PE	M+Na	872.614	16.0637	C49 H88 O8 N1 P1 Na1	1.01476e+06	1840.88	953382	1.19545e+06	911378	1.31635e+06	111702	1.26934e+06	610949	1.01212e+06	1.12742e+06	512185	644845	950915	750528	711403
PE(44:6)	PE	M+H	848.616	14.643	C49 H87 O8 N1 P1	2.27949e+06	32809.7	3.52957e+06	4.87784e+06	2.92708e+06	2.121e+06	459292	2.01457e+06	1.5664e+06	2.33666e+06	193785	1.5035e+06	693103	1.30434e+06	1.18364e+06	352099
PE(24:1_20:5)	PE	M+H	848.616	15.2605	C49 H87 O8 N1 P1	1.42317e+06	4685.62	1.29589e+06	1.59045e+06	587897	174399	66580.9	678120	576286	927786	481893	491950	469530	596541	524560	465855
PE(22:0_22:6)	PE	M+H	848.616	15.7775	C49 H87 O8 N1 P1	466925	2715.35	472414	544865	2.37438e+06	1.86292e+06	343461	3.29777e+06	1.30347e+06	2.10711e+06	992615	1.03562e+06	1.00083e+06	1.22714e+06	1.00454e+06	1.00339e+06
PE(22:1_22:6)	PE	M+H	846.601	14.5029	C49 H85 O8 N1 P1	1.80163e+06	5935.79	1.54756e+06	1.83913e+06	1.39416e+06	1.38547e+06	204610	2.64598e+06	2.37613e+06	3.11551e+06	2.24675e+06	1.54082e+06	1.38197e+06	1.77808e+06	1.55156e+06	1.47552e+06
PE(22:2_22:6)	PE	M+Na	866.567	11.7016	C49 H82 O8 N1 P1 Na1	874781	0	567569	664465	587362	510493	95944	1.80475e+06	960553	1.33187e+06	1.23143e+06	1.18515e+06	811419	625174	693981	798161
PE(44:9)	PE	M+H	842.569	12.1246	C49 H81 O8 N1 P1	2.562e+06	57396.2	1.52381e+06	2.48235e+06	406244	389883	279668	2.19155e+06	2.0305e+06	3.07691e+06	2.41681e+06	1.99546e+06	1.65861e+06	1.17369e+06	1.09439e+06	1.53263e+06
PE(46:2)	PE	M+H	884.71	18.4686	C51 H99 O8 N1 P1	624969	0	549455	573023	1.11167e+06	776454	159123	1.49013e+06	382575	755785	459010	377171	512298	419859	368643	338962
PE(26:0_20:4)	PE	M+H	880.679	17.7606	C51 H95 O8 N1 P1	5280.24	0	4470.24	9354.54	53329	30169.8	6022.8	52271.8	8000.34	25815.1	5708.63	140.324	14055.4	2088.84	55158.5	6608.17
PE(26:1_20:4)	PE	M+H	878.663	17.0375	C51 H93 O8 N1 P1	4.15628e+06	15811.3	3.50155e+06	3.97537e+06	3.00871e+06	2.50506e+06	480508	1.10204e+06	1.88621e+06	2.91413e+06	1.55754e+06	1.559e+06	1.94662e+06	2.30815e+06	2.04946e+06	1.98918e+06
PE(24:1_22:6)	PE	M+H	874.632	15.6784	C51 H89 O8 N1 P1	2.20457e+06	18313.6	2.18818e+06	2.5711e+06	1.67747e+06	1.39934e+06	205041	2.77685e+06	1.20451e+06	2.04469e+06	1.12894e+06	1.03726e+06	1.15493e+06	1.43822e+06	1.30259e+06	1.31475e+06
PE(48:6)	PE	M+H	904.679	17.635	C53 H95 O8 N1 P1	241791	0	191854	241054	872051	684767	120895	1.10059e+06	233067	367109	212544	164823	315994	344619	300616	243473
PG(18:3e)	PG	M+H	507.272	3.21965	C24 H44 O9 N0 P1	2.58757e+08	1.85387e+08	2.43424e+08	2.27322e+08	1.41359e+08	2.44677e+08	2.31459e+08	1.48481e+06	2.41176e+08	2.64213e+08	2.71308e+08	2.46446e+08	2.90665e+08	2.74957e+08	2.48688e+08	2.60386e+08
PG(34:1)	PG	M+Na	771.515	12.4621	C40 H77 O10 N0 P1 Na1	9.52895e+06	953858	7.39064e+06	1.02666e+07	8.63343e+06	8.81502e+06	5.01408e+06	9.97969e+06	8.52194e+06	9.86467e+06	8.38778e+06	8.8434e+06	1.00808e+07	9.10786e+06	9.76425e+06	9.86343e+06
PG(16:1_18:1)	PG	M+NH4	764.544	10.2014	C40 H79 O10 N1 P1	2.1193e+06	5978.43	1.27881e+06	1.52689e+06	697314	613070	303535	905131	413104	807044	515168	480665	741880	490899	869821	502928
PG(36:1)	PG	M+Na	799.546	13.6757	C42 H81 O10 N0 P1 Na1	4.08382e+06	267690	3.01609e+06	4.19405e+06	2.47967e+06	1.85599e+06	877252	2.88873e+06	1.71681e+06	3.34498e+06	998265	1.71871e+06	3.21007e+06	1.73578e+06	840613	2.27389e+06
PG(20:1_18:1)	PG	M+NH4	820.606	12.666	C44 H87 O10 N1 P1	1.3468e+06	373828	1.11597e+06	1.22931e+06	231616	717923	570634	1.04793e+06	312236	534795	1.32068e+06	471288	444273	867889	1.02757e+06	660483
PG(18:1_20:2)	PG	M+NH4	818.591	11.6995	C44 H85 O10 N1 P1	1.90607e+06	696.794	1.3104e+06	1.60825e+06	976623	852341	236706	1.89613e+06	336081	976649	695456	730748	883707	769997	893451	958138
PG(18:1_20:3)	PG	M+NH4	816.575	10.488	C44 H83 O10 N1 P1	1.25688e+06	3417.81	767270	1.15565e+06	932775	771941	175050	998267	175962	263333	208144	211946	576531	901918	562060	432698
PG(18:1_20:4)	PG	M+NH4	814.559	11.1988	C44 H81 O10 N1 P1	4.89556e+06	11294.1	2.81039e+06	4.36265e+06	1.48432e+06	1.12977e+06	36859.2	2.3936e+06	577568	1.07092e+06	1.28731e+06	1.14147e+06	2.28483e+06	1.44227e+06	1.91985e+06	2.06188e+06
PG(16:1_22:6)	PG	M+NH4	810.528	8.646	C44 H77 O10 N1 P1	564095	0	291452	372119	1.02572e+06	550860	386366	1.13865e+06	299079	1.13294e+06	1.26383e+06	1.05731e+06	451082	285658	901775	434596
PG(18:1_22:5)	PG	M+NH4	840.575	10.273	C46 H83 O10 N1 P1	1.26591e+06	0	789678	959634	369748	317981	73611.6	868306	185090	305856	287550	200025	365432	215275	374550	393924
PG(18:0_22:6)	PG	M+NH4	840.575	11.1452	C46 H83 O10 N1 P1	2.15047e+06	2044.66	1.48231e+06	2.47166e+06	4.54777e+06	3.234e+06	1.45927e+06	7.18318e+06	2.75471e+06	2.99265e+06	3.11468e+06	2.54998e+06	3.90685e+06	2.45285e+06	2.37437e+06	3.14285e+06
PG(18:1_22:6)	PG	M+NH4	838.559	9.90644	C46 H81 O10 N1 P1	1.56972e+07	11244.4	9.25584e+06	1.09546e+07	1.82181e+07	1.4676e+07	5.25418e+06	3.14261e+07	1.18554e+07	1.80737e+07	1.63529e+07	1.5631e+07	1.55441e+07	1.05401e+07	1.51974e+07	1.38618e+07
PG(20:1_22:6)	PG	M+NH4	866.591	11.1838	C48 H85 O10 N1 P1	1.59832e+06	0	798819	1.17601e+06	1.65489e+06	1.42359e+06	388599	3.39591e+06	781610	1.2282e+06	1.26396e+06	1.30138e+06	1.4797e+06	962088	1.22624e+06	1.45488e+06
PG(20:2_22:6)	PG	M+NH4	864.575	10.126	C48 H83 O10 N1 P1	609218	0	340904	412153	744641	616286	263804	2.05062e+06	1.1023e+06	927809	1.00239e+06	1.0382e+06	738689	524379	599752	588574
PG(22:4_22:6)	PG	M+NH4	888.575	9.63047	C50 H83 O10 N1 P1	196077	0	123583	149097	131982	147734	48907.1	690984	461578	954413	690301	1.1495e+06	472042	284692	353490	325210
PI(32:1)	PI	M+NH4	826.544	10.8204	C41 H81 O13 N1 P1	2.4004e+06	75718.8	1.16934e+06	2.59038e+06	751524	692854	79110.5	821391	505089	251317	538560	390513	797572	355311	2.12365e+06	466299
PI(16:0_18:1)	PI	M+H	837.549	12.1722	C43 H82 O13 N0 P1	5.03595e+06	222052	2.69391e+06	7.19938e+06	3.11342e+06	2.03463e+06	458432	2.57536e+06	2.15115e+06	1.28159e+06	3.17058e+06	2.82587e+06	2.72213e+06	2.09889e+06	2.55526e+06	2.18569e+06
PI(34:1)	PI	M+NH4	854.575	12.1722	C43 H85 O13 N1 P1	2.02887e+07	1.22463e+06	1.13855e+07	2.73834e+07	9.93119e+06	8.13235e+06	646502	6.84741e+06	6.46827e+06	4.65822e+06	7.9676e+06	7.43504e+06	1.05217e+07	8.28913e+06	6.92014e+06	9.97063e+06
PI(34:2)	PI	M+NH4	852.56	10.8582	C43 H83 O13 N1 P1	3.51021e+06	132877	1.81294e+06	2.98158e+06	2.08864e+06	1.74567e+06	188439	1.21339e+06	969301	843876	1.72015e+06	1.67481e+06	1.64489e+06	3.61204e+06	1.4194e+06	1.59749e+06
PI(35:1)	PI	M+NH4	868.591	12.851	C44 H87 O13 N1 P1	1.56248e+06	7546.98	846123	1.77375e+06	625435	405967	16568.2	406921	628368	340107	862027	838662	325166	633456	644124	784705
PI(36:1)	PI	M+NH4	882.607	13.5014	C45 H89 O13 N1 P1	7.24512e+06	1.62728e+06	1.45606e+07	3.36622e+07	1.02145e+07	7.95703e+06	1.60525e+06	7.77984e+06	5.83295e+06	4.29717e+06	5.70369e+06	6.19486e+06	1.08268e+07	9.09972e+06	8.91971e+06	9.51475e+06
PI(18:1_18:2)	PI	M+NH4	878.575	11.1527	C45 H85 O13 N1 P1	534576	10133.1	87894.4	904051	3.6526e+06	2.55917e+06	753764	5.28023e+06	4.44236e+06	3.50691e+06	6.64669e+06	6.3928e+06	3.78098e+06	2.57181e+06	3.28025e+06	3.50914e+06
PI(16:0_20:3)	PI	M+NH4	878.575	11.4181	C45 H85 O13 N1 P1	1.26793e+06	27974.5	712560	1.5135e+06	1.81396e+06	1.38719e+06	173662	1.49252e+06	864827	522758	1.16346e+06	639494	1.16637e+06	724048	893007	942570
PI(38:1)	PI	M+NH4	910.638	14.6143	C47 H93 O13 N1 P1	2.9692e+06	223866	2.32133e+06	5.06143e+06	156366	126289	3918.36	0	30693.4	0	0	52482.9	519792	795165	587906	248842
PI(18:0_20:2)	PI	M+NH4	908.622	13.6353	C47 H91 O13 N1 P1	1.35954e+06	92740.9	1.07126e+06	2.90593e+06	3.86465e+06	2.60448e+06	455006	1.80398e+06	1.08499e+06	912383	1.0924e+06	1.03008e+06	898072	1.5886e+06	1.87266e+06	758959
PI(18:0_20:3)	PI	M+NH4	906.607	12.7639	C47 H89 O13 N1 P1	5.50344e+06	197698	3.11686e+06	6.35126e+06	7.65208e+06	4.72286e+06	898206	3.66778e+06	3.18485e+06	2.25389e+06	3.71815e+06	2.23395e+06	4.40301e+06	3.12857e+06	3.80701e+06	3.2808e+06
PI(18:1_20:4)	PI	M+Na	907.531	10.917	C47 H81 O13 N0 P1 Na1	634299	15108.3	419061	651668	2.74215e+06	2.15185e+06	410128	2.47419e+06	2.39175e+06	2.00524e+06	2.75845e+06	2.6983e+06	1.61452e+06	1.60489e+06	1.60357e+06	1.50812e+06
PI(18:0_20:5)	PI	M+NH4	902.575	11.2818	C47 H85 O13 N1 P1	1.15251e+06	10254.4	274836	1.32089e+06	1.35647e+06	1.58212e+06	82823.5	2.21808e+06	756998	494493	923715	1.10759e+06	1.47239e+06	766989	1.125e+06	1.23472e+06
PI(40:4)	PI	M+NH4	932.622	13.136	C49 H91 O13 N1 P1	1.40225e+06	0	557497	2.24693e+06	927500	567817	0	1.42686e+06	524946	341617	583146	880836	872311	779772	703418	453863
PI(18:0_22:5)	PI	M+NH4	930.607	12.2073	C49 H89 O13 N1 P1	3.03993e+06	179689	2.3684e+06	5.22102e+06	1.1175e+06	491285	68030	671101	544672	388552	634832	605477	1.40267e+06	1.12717e+06	1.14599e+06	1.40235e+06
PI(18:0_22:6)	PI	M+NH4	928.591	11.8129	C49 H87 O13 N1 P1	6.54574e+06	266739	3.82407e+06	7.29165e+06	3.09702e+06	2.31066e+06	360689	3.11963e+06	949970	801300	1.20351e+06	1.40492e+06	2.82303e+06	2.08733e+06	2.45982e+06	2.52074e+06
PI(40:6)	PI	M+Na	933.546	11.8129	C49 H83 O13 N0 P1 Na1	739073	52086.9	545122	885603	480484	402103	58974.6	344188	170477	135865	184847	193286	431368	398016	374631	408137
PI(18:1_22:6)	PI	M+NH4	926.575	10.5304	C49 H85 O13 N1 P1	971950	17795.5	462618	1.25522e+06	710906	522675	90769.8	980610	343581	289606	469968	441509	608539	442467	582703	570574
PMe(18:0_16:0)	PMe	M+H	691.527	15.0858	C38 H76 O8 N0 P1	3.00998e+06	15127	4.46463e+06	6.01857e+06	3.17117e+06	2.08108e+06	608528	3.89522e+06	1.74158e+06	1.57555e+06	1.04128e+06	1.18493e+06	2.79444e+06	2.81372e+06	2.50905e+06	1.87318e+06
PMe(49:2)	PMe	M+H	897.731	20.2477	C53 H102 O8 N0 P1	2.01697e+07	1.29819e+07	2.30724e+07	2.34302e+07	2.40325e+07	2.52373e+07	1.54734e+07	2.11874e+07	2.262e+07	2.22751e+07	1.93817e+07	1.83011e+07	2.1756e+07	2.26489e+07	1.93474e+07	1.8562e+07
PMe(55:2)	PMe	M+H	981.825	21.184	C59 H114 O8 N0 P1	6.73424e+06	249539	8.14752e+06	6.47212e+06	5.00743e+06	4.34397e+06	1.43091e+06	6.37378e+06	3.08176e+06	3.26552e+06	2.81454e+06	2.92318e+06	3.88454e+06	4.43915e+06	3.79321e+06	3.77515e+06
PS(16:0_18:1)	PS	M+H	762.528	12.3661	C40 H77 O10 N1 P1	4.20212e+06	265516	2.92039e+06	4.93496e+06	4.44571e+06	3.60968e+06	317398	3.26407e+06	6.34549e+06	3.64992e+06	8.04732e+06	9.78413e+06	4.95196e+06	3.40534e+06	4.59931e+06	4.35739e+06
PS(16:1_18:1)	PS	M+H	760.512	11.201	C40 H75 O10 N1 P1	185915	2035.1	177078	448008	1.14417e+06	920973	68380.8	808810	1.48198e+06	1.29009e+06	1.66569e+06	1.50062e+06	1.11813e+06	659985	861337	898240
PS(18:0_18:0)	PS	M+Na	814.557	12.935	C42 H82 O10 N1 P1 Na1	1.48768e+06	3557.52	1.07217e+06	2.08099e+06	3.13987e+06	2.66142e+06	9855.74	2.54153e+06	2.9126e+06	1.68699e+06	462260	3.70307e+06	1.60273e+06	2.12102e+06	2.43173e+06	1.79594e+06
PS(18:1_18:1)	PS	M+H	788.544	12.4146	C42 H79 O10 N1 P1	3.97379e+06	625625	5.28778e+06	8.45403e+06	3.5176e+06	3.14445e+06	1.79705e+06	4.36403e+06	5.96203e+06	4.0771e+06	2.52973e+06	5.29817e+06	2.44443e+06	3.98668e+06	2.34908e+06	5.27521e+06
PS(20:0_18:1)	PS	M+H	818.591	14.9221	C44 H85 O10 N1 P1	428529	12622.8	464493	783265	3.40912e+06	2.80559e+06	577506	1.79974e+06	2.67122e+06	1.3024e+06	2.41123e+06	1.85525e+06	1.1801e+06	1.62526e+06	1.36049e+06	1.17133e+06
PS(18:1_24:0)	PS	M+H	874.653	17.0513	C48 H93 O10 N1 P1	257348	0	168058	306448	6.38643e+06	5.30905e+06	718715	294410	1.59431e+06	1.2427e+06	1.50549e+06	1.6352e+06	1.70125e+06	2.28897e+06	1.69767e+06	1.68836e+06
PS(44:7)	PS	M+Na	912.573	8.415	C50 H84 O10 N1 P1 Na1	13083.7	0	10288.5	8552.35	158779	151400	16350.3	951609	245628	442625	315745	283766	88051.9	62068.3	56277.8	73573.5
SM(d30:1)	SM	M+H	647.512	8.81526	C35 H72 O6 N2 P1	1.4425e+06	10302.5	767745	780328	703131	565022	332720	1.36107e+06	458620	892735	685340	649152	808410	453186	786984	789430
SM(d31:1)	SM	M+H	661.528	9.59969	C36 H74 O6 N2 P1	2.66221e+06	45369.9	1.61186e+06	1.77543e+06	1.46736e+06	1.18165e+06	842740	3.07399e+06	1.23301e+06	2.59954e+06	1.77605e+06	1.67533e+06	1.75757e+06	1.05279e+06	1.72317e+06	1.71779e+06
SM(d32:0)	SM	M+H	677.559	10.965	C37 H78 O6 N2 P1	1.63912e+07	92701.4	1.03028e+07	1.23118e+07	1.39289e+07	1.2012e+07	4.49179e+06	3.18702e+07	1.06908e+07	1.64891e+07	1.60645e+07	1.48499e+07	1.29013e+07	8.4468e+06	1.08883e+07	1.20347e+07
SM(d32:1)	SM	M+H	675.544	10.3866	C37 H76 O6 N2 P1	1.6627e+08	3.26605e+06	9.95113e+07	1.20541e+08	1.09597e+08	9.93689e+07	3.67837e+07	2.33203e+08	9.91163e+07	1.91027e+08	1.4264e+08	1.27721e+08	1.29444e+08	7.34033e+07	1.08348e+08	1.10174e+08
SM(d32:2)	SM	M+H	673.528	9.00815	C37 H74 O6 N2 P1	3.46665e+06	49996.2	1.94914e+06	1.94821e+06	2.27611e+06	1.81583e+06	819917	4.16623e+06	1.27727e+06	1.76645e+06	2.05709e+06	1.93245e+06	2.2494e+06	1.32162e+06	2.14553e+06	2.12317e+06
SM(d33:0)	SM	M+H	691.575	11.7333	C38 H80 O6 N2 P1	4.93623e+06	70632.5	3.36933e+06	3.71169e+06	3.34171e+06	3.05391e+06	721401	8.18213e+06	3.36659e+06	4.67738e+06	3.58633e+06	3.95319e+06	3.37689e+06	2.48398e+06	2.98205e+06	4.63946e+06
SM(d33:1)	SM	M+H	689.559	11.1723	C38 H78 O6 N2 P1	3.11994e+08	4.65659e+06	1.94888e+08	2.40678e+08	2.31376e+08	1.94896e+08	7.24337e+07	3.39796e+08	1.50942e+08	2.06149e+08	2.01021e+08	2.09841e+08	2.03971e+08	1.69254e+08	1.10159e+08	2.09622e+08
SM(d33:2)	SM	M+H	687.544	9.80766	C38 H76 O6 N2 P1	1.60979e+06	1242.61	1.09273e+06	1.2685e+06	791018	617051	256133	1.65267e+06	636417	820922	1.05262e+06	1.05142e+06	1.00364e+06	637346	870203	810537
SM(d18:1_16:0)	SM	M+H	703.575	11.937	C39 H80 O6 N2 P1	1.84486e+09	1.03814e+08	1.56703e+09	2.22672e+09	2.36125e+09	2.13751e+09	5.83486e+08	3.08412e+09	1.87286e+09	2.43834e+09	2.64759e+09	2.51222e+09	2.34976e+09	1.55784e+09	1.99263e+09	2.81928e+08
SM(d18:1_16:1)	SM	M+H	701.559	10.5566	C39 H78 O6 N2 P1	2.2444e+08	3.96508e+06	1.33052e+08	1.69009e+08	1.47028e+08	1.30221e+08	4.33631e+07	2.58616e+08	8.13027e+07	1.14814e+08	1.22347e+08	1.1418e+08	1.39222e+08	8.30934e+07	1.26501e+08	1.24372e+08
SM(d18:2_16:1)	SM	M+H	699.544	10.988	C39 H76 O6 N2 P1	1.85744e+06	284.393	909518	999353	1.60399e+06	1.40731e+06	402397	3.1047e+06	1.09159e+06	1.67614e+06	1.40874e+06	1.32894e+06	1.16428e+06	942267	1.03849e+06	1.02491e+06
SM(d34:4)	SM	M+H	697.528	10.388	C39 H74 O6 N2 P1	1.50231e+07	172456	9.84576e+06	9.78464e+06	9.66256e+06	8.79868e+06	2.88469e+06	2.03187e+07	7.7388e+06	1.77503e+07	8.57618e+06	8.08842e+06	9.02252e+06	6.98624e+06	7.9923e+06	8.05845e+06
SM(d35:0)	SM	M+H	719.606	13.226	C40 H84 O6 N2 P1	3.79742e+06	21837	2.71275e+06	3.98816e+06	4.02224e+06	3.06917e+06	1.04403e+06	8.80329e+06	4.71307e+06	6.4049e+06	5.60812e+06	5.36632e+06	3.88197e+06	3.13443e+06	3.74237e+06	4.28514e+06
SM(d35:1)	SM	M+H	717.591	12.6827	C40 H82 O6 N2 P1	6.97542e+07	1.43874e+06	4.58432e+07	6.12141e+07	4.75335e+07	4.13768e+07	1.37294e+07	6.95482e+07	5.23328e+07	7.44561e+07	5.92517e+07	5.9079e+07	4.65751e+07	4.03797e+07	5.42332e+07	2.85142e+07
SM(d35:2)	SM	M+H	715.575	11.3118	C40 H80 O6 N2 P1	1.05685e+07	72066.6	6.30078e+06	8.22439e+06	7.02537e+06	6.54914e+06	1.55441e+06	1.67794e+07	5.36353e+06	6.63055e+06	7.68187e+06	7.32349e+06	6.64733e+06	4.91968e+06	6.47485e+06	6.7589e+06
SM(d35:4)	SM	M+H	711.544	11.1944	C40 H76 O6 N2 P1	1.44305e+07	225241	2.49887e+07	1.53937e+07	2.82978e+07	2.36912e+07	4.60448e+06	2.11957e+07	1.40595e+07	1.93022e+07	1.09584e+07	1.06854e+07	1.22079e+07	1.68212e+07	1.31338e+07	1.1567e+07
SM(d36:0)	SM	M+H	733.622	13.9365	C41 H86 O6 N2 P1	2.22596e+07	410772	1.59968e+07	2.09691e+07	3.96561e+07	3.20732e+07	8.22396e+06	4.71274e+07	3.31813e+07	4.47203e+07	2.95569e+07	2.31204e+07	2.59071e+07	2.31003e+07	1.9805e+07	2.24582e+07
SM(d36:2)	SM	M+H	729.591	12.0772	C41 H82 O6 N2 P1	4.02662e+07	1.53465e+06	2.99781e+07	4.65523e+07	5.11282e+07	4.49934e+07	1.77319e+07	8.61583e+07	3.72899e+07	4.83943e+07	5.14344e+07	4.11862e+07	4.72408e+07	3.20003e+07	4.2187e+07	4.2428e+07
SM(d18:2_18:1)	SM	M+H	727.575	12.4936	C41 H80 O6 N2 P1	2.86067e+07	412091	2.75648e+07	3.92162e+07	3.57439e+07	3.19048e+07	1.55602e+07	3.16708e+07	2.84763e+07	3.00593e+07	2.95743e+07	3.90393e+07	4.07487e+07	2.69502e+07	3.45689e+07	3.46321e+07
SM(d36:4)	SM	M+H	725.559	11.9034	C41 H78 O6 N2 P1	3.56223e+07	8.92606e+06	3.57127e+07	4.62515e+07	8.12944e+07	7.84089e+07	8.74119e+07	7.21109e+07	8.68145e+07	8.12518e+07	9.32812e+07	9.56453e+07	8.78341e+07	6.69072e+07	7.31647e+07	6.72102e+07
SM(d36:5)	SM	M+H	723.544	10.5608	C41 H76 O6 N2 P1	2.34436e+07	234643	1.36197e+07	1.75268e+07	1.51552e+07	1.34179e+07	2.62213e+06	2.67019e+07	7.26933e+06	1.05605e+07	9.71103e+06	8.93846e+06	1.31787e+07	8.92568e+06	1.17313e+07	1.14614e+07
SM(d37:0)	SM	M+H	747.637	14.601	C42 H88 O6 N2 P1	994471	2791.96	1.09221e+06	1.06444e+06	2.79635e+06	2.38438e+06	605026	1.56053e+06	1.87975e+06	2.44943e+06	1.55033e+06	1.25761e+06	758238	815508	862489	925706
SM(d37:1)	SM	M+H	745.622	14.0998	C42 H86 O6 N2 P1	1.4718e+07	237342	1.07374e+07	1.40494e+07	1.27056e+08	1.08193e+08	2.92294e+07	1.12481e+08	8.31813e+07	1.04488e+08	838203	3.96601e+06	5.57547e+07	5.61332e+07	6.33238e+07	5.0404e+07
SM(d37:3)	SM	M+H	741.591	12.4327	C42 H82 O6 N2 P1	52064.6	149587	105717	128979	187992	40415.5	6.23176e+06	5.28562e+06	3.79429e+06	2.48875e+07	24665.3	11294.3	3.43199e+06	2.4288e+06	2.94466e+06	3.40162e+06
SM(d38:0)	SM	M+H	761.653	15.2622	C43 H90 O6 N2 P1	1.48095e+07	313721	1.52974e+07	1.75228e+07	1.20483e+07	9.94727e+06	1.66472e+06	1.55277e+07	1.01514e+07	1.49166e+07	8.8418e+06	9.28909e+06	7.38465e+06	9.64676e+06	7.44484e+06	7.3915e+06
SM(d38:4)	SM	M+H	753.591	13.481	C43 H82 O6 N2 P1	2.34405e+06	767794	1.7078e+06	3.01993e+06	1.26648e+06	2.94941e+06	2.78547e+06	2.79136e+06	2.06114e+06	3.86493e+06	3.63868e+06	4.12981e+06	3.51328e+06	3.54544e+06	3.13778e+06	3.33762e+06
SM(d38:5)	SM	M+H	751.575	12.076	C43 H80 O6 N2 P1	872141	72689	829838	1.02666e+06	2.3312e+06	2.49901e+06	1.51881e+06	3.37204e+06	2.09982e+06	2.43182e+06	2.31716e+06	2.28999e+06	2.17807e+06	1.78824e+06	1.95245e+06	1.44145e+06
SM(d39:0)	SM	M+H	775.669	15.8701	C44 H92 O6 N2 P1	2.19308e+06	37771.7	2.61471e+06	2.96721e+06	1.19081e+06	963433	174224	1.30478e+06	998646	1.05043e+06	742120	646413	883328	1.16024e+06	750382	1.03564e+06
SM(d39:2)	SM	M+H	771.637	14.188	C44 H88 O6 N2 P1	2.89179e+06	33909.3	2.40966e+06	2.68737e+06	4.63384e+06	4.30019e+06	1.1754e+06	4.47226e+06	2.00505e+06	761472	1.88047e+06	2.07153e+06	1.59149e+06	2.07722e+06	1.73149e+06	1.69246e+06
SM(d18:1_21:4)	SM	M+H	765.591	15.0863	C44 H82 O6 N2 P1	5501.31	0	0	10045	2.72025e+06	2.26856e+06	406650	1.04651e+06	3.84193e+06	4.88389e+06	2.71802e+06	2.58403e+06	1.43979e+06	1.68007e+06	1.30561e+06	948958
SM(d18:1_22:0)	SM	M+H	787.669	16.0144	C45 H92 O6 N2 P1	4.41872e+08	9.99688e+06	4.44094e+08	5.15702e+08	3.20166e+08	2.75365e+08	4.3733e+07	2.49973e+08	2.79486e+08	4.2346e+08	2.65942e+08	2.14977e+08	2.29331e+08	2.55875e+08	2.25966e+08	2.00598e+08
SM(d18:2_22:1)	SM	M+H	783.637	15.2613	C45 H88 O6 N2 P1	2.08556e+06	4308.93	1.79595e+06	2.50461e+06	1.20009e+06	1.03519e+06	115132	1.61692e+06	492591	1.4901e+06	617293	694889	755207	914175	807112	716091
SM(d40:4)	SM	M+H	781.622	14.78	C45 H86 O6 N2 P1	1.11783e+07	140689	9.97499e+06	1.27137e+07	9.47918e+06	7.53421e+06	835182	8.26165e+06	9.76018e+06	1.3754e+07	8.8389e+06	7.30743e+06	6.2326e+06	7.32033e+06	6.25369e+06	6.41807e+06
SM(d41:0)	SM	M+H	803.7	16.9551	C46 H96 O6 N2 P1	4.64331e+06	56148.5	4.68655e+06	4.60352e+06	3.02897e+06	2.76199e+06	492525	3.24609e+06	1.88748e+06	2.57262e+06	1.77353e+06	1.5305e+06	1.92479e+06	2.28391e+06	1.73143e+06	1.63688e+06
SM(d41:1)	SM	M+H	801.684	16.5695	C46 H94 O6 N2 P1	1.31945e+08	3.56312e+06	1.29927e+08	1.3724e+08	6.04232e+07	5.40592e+07	1.1682e+07	6.06177e+07	4.48213e+07	6.89786e+07	4.13208e+07	4.15303e+07	5.04011e+07	5.64232e+07	4.81259e+07	5.04141e+07
SM(d18:1_23:1)	SM	M+H	799.669	15.2749	C46 H92 O6 N2 P1	1.30841e+08	2.94849e+06	1.31006e+08	1.51648e+08	4.28096e+07	3.7549e+07	5.27921e+06	5.8364e+07	5.05515e+07	8.10521e+07	4.14159e+07	4.38618e+07	4.44338e+07	5.71731e+07	4.43821e+07	4.34969e+07
SM(d41:3)	SM	M+H	797.653	14.0844	C46 H90 O6 N2 P1	1.1924e+07	329273	1.10564e+07	1.30747e+07	2.06852e+07	1.82078e+07	6.41329e+06	1.77037e+07	2.60995e+07	3.21947e+07	3.16451e+07	2.7754e+07	1.11371e+07	1.4961e+07	1.40509e+07	1.2736e+07
SM(d18:1_23:4)	SM	M+H	793.622	16.103	C46 H86 O6 N2 P1	916520	0	961144	1.37502e+06	60222.2	39538.6	6361.88	43256.2	61526.3	14621.9	11767.4	8752.46	264639	261220	258348	144408
SM(d18:1_24:0)	SM	M+Na	837.682	17.046	C47 H95 O6 N2 P1 Na1	5.74709e+07	831720	5.96388e+07	6.70943e+07	9.0495e+07	7.9347e+07	9.72694e+06	5.37148e+07	3.94322e+07	6.15192e+07	3.21005e+07	3.12453e+07	3.49089e+07	4.06253e+07	3.40983e+07	3.2692e+07
SM(d18:1_24:1)	SM	M+H	813.684	15.8959	C47 H94 O6 N2 P1	1.37457e+09	4.10174e+07	1.5864e+09	2.08672e+09	6.00166e+08	4.97333e+08	9.37826e+07	5.70314e+08	7.71442e+08	1.14146e+09	6.47406e+08	5.37289e+08	4.1817e+08	7.69193e+08	6.21335e+08	1.23788e+08
SM(d42:3)	SM	M+H	811.669	14.0678	C47 H92 O6 N2 P1	2.11324e+06	90731.9	2.73476e+06	2.92826e+06	249139	225343	106157	1.56945e+06	1.18707e+06	1.1653e+06	157816	735148	539940	920092	726178	781166
SM(d18:2_24:1)	SM	M+H	811.669	14.7551	C47 H92 O6 N2 P1	1.04701e+08	5.93787e+06	2.59736e+08	3.3292e+08	9.51125e+07	7.38065e+07	1.5472e+07	1.44066e+08	1.23448e+08	1.81833e+08	1.17505e+08	9.08806e+07	6.90568e+07	1.28797e+08	3.8632e+07	9.70605e+07
SM(d42:4)	SM	M+H	809.653	13.7415	C47 H90 O6 N2 P1	1.03269e+07	207542	9.02502e+06	1.89725e+07	6.12031e+06	6.11286e+06	991545	1.15799e+07	7.18134e+06	8.72319e+06	7.96911e+06	6.48513e+06	3.89682e+06	6.92298e+06	8.024e+06	1.04547e+07
SM(d18:1_24:3)	SM	M+H	809.653	16.006	C47 H90 O6 N2 P1	5.4508e+07	648901	5.31314e+07	6.92243e+07	4.01227e+07	3.4075e+07	3.74842e+06	3.28971e+07	3.31372e+07	5.25523e+07	3.29863e+07	2.51503e+07	2.93188e+07	3.14534e+07	2.72585e+07	2.42531e+07
SM(d18:2_24:3)	SM	M+H	807.637	14.7275	C47 H88 O6 N2 P1	1.59154e+07	252240	1.52609e+07	2.03028e+07	5.00348e+06	4.14038e+06	1.06883e+06	6.64179e+06	5.71155e+06	8.26409e+06	4.92177e+06	4.26326e+06	5.91795e+06	6.88674e+06	5.614e+06	5.99828e+06
SM(d43:1)	SM	M+H	829.716	17.3067	C48 H98 O6 N2 P1	4.15852e+06	91190.3	4.35755e+06	4.43001e+06	7.46556e+06	6.70004e+06	1.05005e+06	7.58539e+06	2.93119e+06	4.78069e+06	2.70976e+06	2.67964e+06	2.66551e+06	3.29389e+06	2.51257e+06	2.60267e+06
SM(d43:2)	SM	M+H	827.7	16.434	C48 H96 O6 N2 P1	7.69319e+07	1.62749e+06	6.16046e+07	6.63113e+07	2.83608e+07	2.40512e+07	6.06e+06	2.14276e+07	2.86176e+07	4.27663e+07	2.60151e+07	2.39931e+07	2.90463e+07	3.11434e+07	2.71678e+07	2.53094e+07
SM(d43:3)	SM	M+H	825.684	15.4065	C48 H94 O6 N2 P1	5.4914e+06	7540.25	6.02878e+06	6.24153e+06	4.26433e+06	3.91904e+06	736051	6.53096e+06	5.79233e+06	8.21684e+06	3.97248e+06	4.12403e+06	3.18022e+06	3.96781e+06	3.36295e+06	3.0095e+06
SM(d19:1_24:3)	SM	M+H	823.669	16.5788	C48 H92 O6 N2 P1	1.33434e+07	270291	1.24738e+07	1.2427e+07	7.6712e+06	5.94913e+06	1.4627e+06	8.11509e+06	5.33718e+06	7.2256e+06	4.54728e+06	4.79968e+06	5.17468e+06	5.68551e+06	4.97756e+06	5.32239e+06
SM(d43:5)	SM	M+H	821.653	15.2745	C48 H90 O6 N2 P1	1.81091e+07	158958	1.6137e+07	2.03053e+07	3.58496e+06	3.29597e+06	442405	7.06618e+06	5.01655e+06	9.17249e+06	4.50984e+06	4.48955e+06	4.73222e+06	5.94216e+06	4.77418e+06	4.67119e+06
SM(d43:6)	SM	M+H	819.637	14.07	C48 H88 O6 N2 P1	1.21788e+06	0	1.42702e+06	1.71451e+06	76166.7	943993	344550	973747	1.96028e+06	2.52893e+06	2.06838e+06	1.94924e+06	1.30804e+06	416126	1.579e+06	1.56682e+06
SM(d44:0)	SM	M+H	845.747	18.1327	C49 H102 O6 N2 P1	1.84559e+06	9257.27	2.06065e+06	1.99472e+06	997842	646543	119998	843018	332335	421061	305080	264259	565864	619421	490423	425622
SM(d44:2)	SM	M+H	841.716	16.9595	C49 H98 O6 N2 P1	1.18086e+08	2.35817e+06	1.13782e+08	1.21756e+08	2.99657e+07	2.48604e+07	4.86278e+06	2.8546e+07	3.19611e+07	5.00991e+07	2.69453e+07	2.32003e+07	3.6244e+07	4.42439e+07	3.47832e+07	3.43635e+07
SM(d44:4)	SM	M+H	837.684	15.0274	C49 H94 O6 N2 P1	2.0028e+06	4290.18	2.10545e+06	2.96167e+06	725208	514795	52884	1.60368e+06	1.58708e+06	2.12658e+06	1.42593e+06	715759	1.09486e+06	1.26728e+06	1.17747e+06	848857
SM(d20:1_24:3)	SM	M+H	837.684	17.0461	C49 H94 O6 N2 P1	5.74068e+07	831482	5.96511e+07	6.70673e+07	9.06038e+07	7.93426e+07	9.75063e+06	5.34536e+07	3.90025e+07	6.1786e+07	3.21151e+07	3.12279e+07	3.49093e+07	4.06862e+07	3.42291e+07	3.27503e+07
SM(d44:5)	SM	M+H	835.669	15.8907	C49 H92 O6 N2 P1	1.15288e+08	2.71664e+06	1.42982e+08	2.0279e+08	6.98968e+07	6.00399e+07	8.86477e+06	6.19838e+07	1.01054e+08	1.26984e+08	7.44626e+07	6.26328e+07	8.13882e+07	9.52373e+07	7.01346e+07	8.17192e+07
SM(d44:6)	SM	M+H	833.653	14.7666	C49 H90 O6 N2 P1	2.00061e+07	418772	2.0613e+07	2.86778e+07	8.44848e+06	6.8105e+06	1.89703e+06	1.06085e+07	1.3317e+07	1.86861e+07	1.1953e+07	1.00165e+07	1.05418e+07	1.18526e+07	8.94961e+06	1.10002e+07
SM(t32:1)	SM	M+H	691.538	9.933	C37 H76 O7 N2 P1	472091	301.864	268541	372605	161187	91050.8	103810	539611	222366	789132	135927	164018	328572	167854	289804	259573
SM(t36:3)	SM	M+H	743.57	11.1954	C41 H80 O7 N2 P1	5.37388e+06	60675.2	5.79756e+06	4.20129e+06	88581.3	36108.3	5610.97	113474	83308.7	162004	89368.2	34804.9	1.19496e+06	1.58056e+06	1.11103e+06	1.08629e+06
SM(t38:4)	SM	M+H	769.585	13.971	C43 H82 O7 N2 P1	2.72337e+07	2.04108e+07	2.53064e+07	2.72061e+07	1.85674e+07	1.29602e+07	2.06168e+07	85986.8	3.01993e+07	2.43812e+07	1.33569e+07	1.22809e+07	3.62562e+07	1.50001e+07	1.98321e+07	3.39068e+07
SM(t39:7)	SM	M+H	777.554	13.644	C44 H78 O7 N2 P1	2.59499e+06	68551.2	1.48333e+06	2.41785e+06	2.23515e+06	2.14794e+06	480165	2.89014e+06	1.15281e+06	2.40144e+06	2.1421e+06	1.80208e+06	1.04731e+06	1.21217e+06	2.10791e+06	940344
SM(t40:1)	SM	M+H	803.664	15.594	C45 H92 O7 N2 P1	2.2615e+06	119285	2.96871e+06	2.9896e+06	1.77765e+06	1.07998e+06	86999.7	349871	239222	1.27574e+06	671718	150395	624648	1.62752e+06	1.75155e+06	1.33536e+06
SM(t40:6)	SM	M+H	793.585	13.995	C45 H82 O7 N2 P1	302920	314.848	181782	198474	3.6275e+06	3.53279e+06	1.27006e+06	1.08056e+06	1.18324e+06	3.07827e+06	2.6265e+06	2.89703e+06	706476	1.46321e+06	1.35775e+06	912280
SM(t42:0)	SM	M+H	833.711	16.493	C47 H98 O7 N2 P1	7.90934e+06	194227	7.26259e+06	7.62004e+06	224752	201308	5422.06	612568	27086.6	164421	91048.9	132712	1.55391e+06	1.69761e+06	1.44472e+06	1.38609e+06
SM(t18:0_24:1)	SM	M+H	831.695	16.7975	C47 H96 O7 N2 P1	2.59879e+07	496888	2.45374e+07	2.56792e+07	2.21056e+06	1.92861e+06	434718	1.72093e+06	788973	1.00711e+06	763510	698395	5.7459e+06	6.1483e+06	5.27376e+06	5.76935e+06
SM(t18:0_24:2)	SM	M+H	829.679	15.6117	C47 H94 O7 N2 P1	3.11409e+07	614248	3.34645e+07	3.58748e+07	226256	126783	62363.1	427038	343164	1.26441e+06	511912	278883	5.98235e+06	7.98329e+06	6.76053e+06	7.6985e+06
SPH(t20:0)	SPH	M+H	346.332	3.094	C20 H44 O3 N1	2.40621e+07	1.04091e+07	2.49068e+07	1.77045e+07	1.78658e+07	2.10942e+07	1.90411e+07	1.70943e+07	2.38677e+07	1.91326e+07	2.45023e+07	2.33613e+07	2.31623e+07	2.14271e+07	2.24711e+07	2.03618e+07
TG(8:0_8:0_8:0)	TG	M+NH4	488.395	8.806	C27 H54 O6 N1	2.22452e+06	120357	1.1075e+06	1.66144e+06	298938	170561	231228	78810.8	34720.6	1.39179e+06	111807	169062	138766	1.41844e+06	247745	1.48693e+06
TG(6:0_10:3_10:4)	TG	M+H	485.29	4.386	C29 H41 O6	184482	117723	38479	127873	131769	22866.6	150844	24836.2	251257	279944	146696	228276	198485	52380.4	198538	19499.8
TG(6:0_10:4_10:4)	TG	M+H	483.274	4.36612	C29 H39 O6	1.13684e+06	608441	1.40099e+06	798741	934759	791708	1.13879e+06	94746.7	924450	1.10773e+06	1.26549e+06	1.25313e+06	1.09091e+06	1.07101e+06	1.04431e+06	1.01548e+06
TG(8:0_10:4_10:4)	TG	M+NH4	528.332	4.38747	C31 H46 O6 N1	676089	374706	948834	565439	716521	643529	982335	0	758247	1.35401e+06	1.17981e+06	1.09119e+06	487966	512493	530996	593374
TG(37:2)	TG	M+NH4	666.567	1.43286	C40 H76 O6 N1	90216	79383.8	177023	92086.7	259032	317414	145970	0	341167	618192	118105	259978	141834	284834	377747	310385
TG(12:0_14:0_14:0)	TG	M+NH4	712.645	18.3392	C43 H86 O6 N1	1.07016e+06	394418	1.58115e+06	1.33021e+06	761280	727661	297129	673415	437213	231400	359503	200935	538856	557690	396516	483125
TG(4:0_18:1_18:1)	TG	M+NH4	708.614	17.099	C43 H82 O6 N1	339551	11361.2	798034	1.15008e+06	159578	85753.6	7099.02	0.159	152893	14634.8	6155.49	46867.7	221297	120208	138878	198997
TG(40:4e)	TG	M+NH4	690.603	16.1228	C43 H80 O5 N1	832013	2232.75	1.03128e+06	1.29834e+06	1.01988e+06	1.19388e+06	144555	4.97108e+06	1.91985e+06	2.43209e+06	2.72235e+06	1.66072e+06	1.11898e+06	1.01611e+06	1.45994e+06	1.29476e+06
TG(40:5e)	TG	M+NH4	688.587	15.2236	C43 H78 O5 N1	2.65718e+06	14886	3.84326e+06	3.35332e+06	3.86284e+06	1.75182e+06	317738	4.41795e+06	3.83204e+06	4.13488e+06	2.52247e+06	3.31036e+06	2.56437e+06	2.65126e+06	1.85034e+06	2.98914e+06
TG(16:0_12:0_14:0)	TG	M+NH4	740.676	18.9285	C45 H90 O6 N1	5.69401e+06	510487	7.69841e+06	5.72267e+06	7.23638e+06	4.98222e+06	1.00274e+06	5.39068e+06	2.85295e+06	2.4907e+06	2.7045e+06	2.61343e+06	2.8623e+06	3.25942e+06	3.10659e+06	2.96805e+06
TG(16:0_12:1_14:0)	TG	M+NH4	738.661	18.3375	C45 H88 O6 N1	2.88498e+06	541742	4.21628e+06	3.25533e+06	1.33261e+06	980560	181658	1.06621e+06	741729	962897	287697	225536	1.13078e+06	1.26356e+06	761386	1.73635e+06
TG(42:5e)	TG	M+NH4	716.619	16.1455	C45 H82 O5 N1	184653	0	1.73e+06	1.19433e+06	524886	357818	5155.75	2.01604e+06	1.92076e+06	2.07341e+06	1.24724e+06	1.17161e+06	423062	917757	1.10746e+06	889501
TG(42:6e)	TG	M+NH4	714.603	15.2596	C45 H80 O5 N1	4.66118e+06	102586	4.48454e+06	4.95271e+06	1.40348e+06	842023	121362	1.88427e+06	2.89568e+06	3.04593e+06	1.67848e+06	2.38982e+06	1.68533e+06	2.73167e+06	1.60634e+06	1.9405e+06
TG(16:0_13:0_14:0)	TG	M+NH4	754.692	19.126	C46 H92 O6 N1	2.81961e+06	226316	3.43493e+06	2.944e+06	2.68298e+06	1.77205e+06	680544	2.39834e+06	343550	1.49716e+06	1.26741e+06	561612	1.5998e+06	1.72738e+06	1.51124e+06	1.44333e+06
TG(16:0_10:0_17:1)	TG	M+NH4	752.676	18.642	C46 H90 O6 N1	1.33383e+06	87701.9	1.84993e+06	1.51511e+06	984231	423609	155683	540256	309818	297896	422504	314696	244546	625770	413926	542967
TG(16:0_14:0_14:0)	TG	M+NH4	768.708	19.437	C47 H94 O6 N1	2.14147e+07	1.48267e+06	2.72011e+07	1.97483e+07	6.18586e+07	4.81788e+07	1.2127e+07	4.78591e+07	2.69989e+07	2.95735e+07	2.72138e+07	2.83109e+07	2.48339e+07	2.75166e+07	2.24989e+07	2.16802e+07
TG(14:0e_14:0_16:0)	TG	M+NH4	754.728	20.0516	C47 H96 O5 N1	0	0	0.112	0	5.14766e+06	4.61338e+06	1.01912e+06	5.4544e+06	1.68911e+06	1.67406e+06	1.59313e+06	1.52105e+06	1.61381e+06	1.73233e+06	1.59758e+06	1.54058e+06
TG(16:0_12:1_16:0)	TG	M+NH4	766.692	18.9238	C47 H92 O6 N1	1.88533e+07	839339	2.61742e+07	2.06706e+07	1.71719e+07	1.15667e+07	2.3284e+06	1.14217e+07	7.00416e+06	7.85617e+06	7.91385e+06	7.35416e+06	9.85026e+06	1.04929e+07	8.93594e+06	8.74332e+06
TG(16:0_12:1_16:1)	TG	M+NH4	764.676	18.3465	C47 H90 O6 N1	4.38413e+06	80282.8	3.9319e+06	3.09843e+06	1.63759e+06	770289	117694	746427	480766	278900	512686	406513	1.35612e+06	1.12749e+06	1.22984e+06	898810
TG(16:0_14:0_14:3)	TG	M+H	745.634	18.925	C47 H85 O6	1.19018e+06	125813	2.04893e+06	1.40153e+06	1.4912e+06	2.41342e+06	336070	1.54381e+06	520382	518603	395786	683285	815695	949051	812032	729249
TG(6:0_18:1_20:3)	TG	M+Na	765.6	13.365	C47 H82 O6 Na1	2.22784e+06	110108	1.7073e+06	3.12939e+06	2.69542e+06	2.61523e+06	879417	684216	1.37453e+06	898867	1.72212e+06	1.10643e+06	1.73418e+06	1.28622e+06	1.58394e+06	2.02986e+06
TG(15:0_14:0_16:0)	TG	M+NH4	782.723	19.6052	C48 H96 O6 N1	4.6345e+06	581573	5.56821e+06	4.30513e+06	4.42797e+06	3.30291e+06	899158	3.67728e+06	3.66925e+06	3.24043e+06	3.37629e+06	3.0129e+06	3.49245e+06	3.53407e+06	3.21982e+06	2.44065e+06
TG(14:0_14:0_17:1)	TG	M+NH4	780.708	19.1776	C48 H94 O6 N1	8.61981e+06	274734	8.70204e+06	6.28559e+06	7.33329e+06	4.53422e+06	1.20342e+06	7.28786e+06	4.75536e+06	5.09237e+06	5.52038e+06	4.90637e+06	4.05896e+06	5.14634e+06	4.28587e+06	4.12023e+06
TG(10:0_17:1_18:1)	TG	M+NH4	778.692	18.646	C48 H92 O6 N1	1.08782e+06	13823.4	1.28295e+06	2.16858e+06	1.50061e+06	741303	179553	693227	525045	553467	729529	581407	745182	608604	404178	731692
TG(16:0e_14:0_16:0)	TG	M+Na	787.715	20.4634	C49 H96 O5 Na1	0	0	0	0	1.08226e+07	1.00088e+07	3.21717e+06	4.20354e+06	3.14754e+06	3.57071e+06	3.01987e+06	3.05078e+06	3.25878e+06	3.77504e+06	3.2106e+06	3.25929e+06
TG(16:0_14:0_16:1)	TG	M+NH4	794.723	19.4179	C49 H96 O6 N1	8.57138e+07	5.5239e+06	1.13776e+08	9.55992e+07	1.57331e+08	1.18134e+08	2.93531e+07	1.14018e+08	9.96656e+07	1.08938e+08	1.00171e+08	1.0498e+08	7.71427e+07	9.28615e+07	7.49564e+07	6.49071e+07
TG(12:0e_16:0_18:1)	TG	M+NH4	780.744	20.0294	C49 H98 O5 N1	0	0	0	0	9.72712e+06	8.38113e+06	1.87987e+06	1.08182e+07	5.16756e+06	5.57483e+06	4.93984e+06	4.95785e+06	3.72182e+06	4.16913e+06	3.48157e+06	3.35663e+06
TG(16:0_12:1_18:1)	TG	M+NH4	792.708	18.9383	C49 H94 O6 N1	2.50984e+07	1.91207e+06	3.41018e+07	2.59441e+07	2.44979e+07	1.616e+07	3.48866e+06	1.55759e+07	1.41529e+07	1.57004e+07	1.59005e+07	1.48455e+07	16045241	1.69712e+07	1.47127e+07	1.43021e+07
TG(12:0e_16:0_18:2)	TG	M+NH4	778.728	19.649	C49 H96 O5 N1	7955.68	0	16855.3	5455.15	721567	469664	70664	2.21023e+06	787362	801968	719077	798721	459047	546488	448621	396258
TG(16:1_14:1_16:1)	TG	M+NH4	790.692	18.4863	C49 H92 O6 N1	3.12705e+06	156331	2.34131e+06	3.34527e+06	2.47281e+06	1.13413e+06	287045	1.44653e+06	1.01818e+06	1.37124e+06	1.08133e+06	1.18031e+06	1.37018e+06	1.34819e+06	1.22989e+06	1.19949e+06
TG(14:0_14:0_18:3)	TG	M+H	773.665	19.4446	C49 H89 O6	2.50175e+06	228244	3.0886e+06	3.15701e+06	7.02299e+06	6.80314e+06	1.76681e+06	5.01217e+06	3.08847e+06	3.15279e+06	2.63274e+06	2.75572e+06	3.04743e+06	3.54938e+06	2.70735e+06	2.65913e+06
TG(18:4_14:0_14:0)	TG	M+H	771.65	18.9164	C49 H87 O6	4.35526e+06	166747	5.57335e+06	4.98106e+06	3.58667e+06	2.84467e+06	491979	2.58525e+06	1.52715e+06	1.55669e+06	1.41529e+06	1.34964e+06	1.95612e+06	2.57272e+06	1.70965e+06	1.86158e+06
TG(16:1_12:3_18:1)	TG	M+H	769.634	18.3385	C49 H85 O6	921033	1686.74	1.29941e+06	1.15646e+06	214626	200854	11382.7	263034	100209	108894	91809.9	85361	293526	425549	301672	293221
TG(16:0_14:0_17:0)	TG	M+NH4	810.755	20.0821	C50 H100 O6 N1	2.09154e+07	2.72522e+06	2.73966e+07	2.08176e+07	6.25647e+07	6.15635e+07	1.35287e+07	4.74862e+07	3.60085e+07	3.76924e+07	3.58931e+07	3.41364e+07	2.55832e+07	3.89355e+07	2.47686e+07	2.47555e+07
TG(14:0e_16:0_17:0)	TG	M+NH4	796.775	20.643	C50 H102 O5 N1	0	3840.31	3695.2	0	9.04771e+06	6.12264e+06	2.20458e+06	4.69152e+06	4.53603e+06	3.89681e+06	3.5417e+06	4.72972e+06	3.17213e+06	2.81718e+06	2.74795e+06	2.33409e+06
TG(15:0_16:0_16:1)	TG	M+NH4	808.739	19.655	C50 H98 O6 N1	3.04693e+07	1.49092e+06	5.13088e+07	3.82979e+07	5.9893e+07	4.5534e+07	1.03997e+07	5.17698e+07	5.02212e+07	5.40655e+07	5.13201e+07	5.14755e+07	3.69673e+07	4.23641e+07	3.34084e+07	3.36186e+07
TG(16:1_14:0_17:1)	TG	M+NH4	806.723	19.1855	C50 H96 O6 N1	1.11074e+07	611362	1.38136e+07	1.10092e+07	1.21806e+07	8.21454e+06	1.9267e+06	1.06121e+07	9.35326e+06	1.08481e+07	1.0293e+07	9.33088e+06	7.65826e+06	8.32026e+06	6.98802e+06	6.88255e+06
TG(18:0_14:0_16:0)	TG	M+NH4	824.77	22.305	C51 H102 O6 N1	44919.2	10917.8	112293	30046.9	721382	139335	33377.6	54176.4	112370	14409.1	16261.5	214474	69409.6	50995.4	190409	84035
TG(16:0e_16:0_16:0)	TG	M+Na	815.746	20.8193	C51 H100 O5 Na1	2524.98	1356.79	0	0	4.27716e+07	3.9646e+07	1.36895e+07	1.62853e+07	1.29185e+07	1.41349e+07	1.24644e+07	1.27994e+07	1.31693e+07	1.48038e+07	1.44552e+07	1.27508e+07
TG(18:1e_14:0_16:0)	TG	M+NH4	808.775	20.4356	C51 H102 O5 N1	17259.2	34491.3	0	41879.2	1.12496e+08	9.46213e+07	2.34129e+07	5.06502e+07	5.42752e+07	5.95368e+07	5.52995e+07	5.7842e+07	3.68237e+07	4.15848e+07	3.57911e+07	3.42706e+07
TG(16:1_14:0_18:1)	TG	M+Na	825.694	19.4264	C51 H94 O6 Na1	2.216e+07	2.39413e+06	2.746e+07	2.54572e+07	2.55571e+07	2.43871e+07	6.00255e+06	1.77127e+07	2.05636e+07	2.1414e+07	1.83639e+07	1.9209e+07	1.73439e+07	2.04314e+07	1.57977e+07	1.46246e+07
TG(16:0_16:1_16:1)	TG	M+NH4	820.739	19.7017	C51 H98 O6 N1	4.50276e+07	6.05552e+06	5.68823e+07	4.53676e+07	1.01188e+08	8.09731e+07	855090	7.58267e+07	5.41287e+06	6.7537e+06	6.6588e+06	5.61409e+06	3.44828e+06	6.54464e+07	3.75066e+06	4.78796e+07
TG(18:1e_14:0_16:1)	TG	M+NH4	806.76	20.0711	C51 H100 O5 N1	0	0	13866.4	6646.86	1.04775e+07	8.68388e+06	1.93468e+06	6.43003e+06	7.79309e+06	8.18013e+06	7.99283e+06	7.71002e+06	4.64259e+06	5.08329e+06	4.07386e+06	4.07732e+06
TG(16:1_14:0_18:2)	TG	M+NH4	818.723	18.9597	C51 H96 O6 N1	2.35958e+07	2.24186e+06	2.95844e+07	2.25629e+07	2.24758e+07	1.50298e+07	3.17056e+06	1.62102e+07	1.96465e+07	2.10738e+07	2.1353e+07	2.7748e+07	1.55965e+07	2.04193e+07	1.51245e+07	1.49318e+07
TG(16:0_14:0_18:3)	TG	M+H	801.697	19.9084	C51 H93 O6	4.12247e+06	977675	5.38937e+06	4.70909e+06	1.92945e+07	1.93769e+07	8.6652e+06	1.16479e+07	7.53075e+06	7.49803e+06	5.6448e+06	6.72038e+06	7.97547e+06	9.26198e+06	8.15779e+06	7.71569e+06
TG(14:0_14:0_20:4)	TG	M+NH4	816.708	18.8007	C51 H94 O6 N1	586552	76561.5	1.28411e+06	996381	464817	2.25501e+06	239226	312795	662071	985439	701767	606253	1.57323e+06	596092	436227	479136
TG(16:1_14:0_18:3)	TG	M+H	799.681	19.4199	C51 H91 O6	1.18522e+07	808818	1.50125e+07	1.41417e+07	1.77421e+07	1.64382e+07	3.85908e+06	1.31109e+07	1.11601e+07	1.16723e+07	9.73579e+06	1.03874e+07	1.01852e+07	1.19703e+07	9.95757e+06	8.9545e+06
TG(10:0_18:1_20:4)	TG	M+NH4	814.692	18.2059	C51 H92 O6 N1	1.20182e+06	62278.5	630892	599426	1.68209e+06	1.22818e+06	316455	1.08166e+06	1.32633e+06	746283	887945	958783	365343	1.36298e+06	288104	334490
TG(18:4_14:0_16:1)	TG	M+H	797.665	18.9283	C51 H89 O6	6.8064e+06	338664	8.95718e+06	5.89258e+06	4.74981e+06	3.70718e+06	689554	3.05158e+06	2.98051e+06	2.85659e+06	2.7867e+06	2.31798e+06	3.13093e+06	3.95302e+06	2.65698e+06	2.36937e+06
TG(16:0_16:0_17:0)	TG	M+Na	843.741	20.4823	C52 H100 O6 Na1	2.85403e+06	249099	3.30128e+06	2.66857e+06	9.68444e+06	7.70364e+06	3.37172e+06	8.62654e+06	3.93414e+06	4.51085e+06	5.34749e+06	4.15219e+06	5.2274e+06	4.47362e+06	4.04022e+06	3.77887e+06
TG(16:0e_16:0_17:0)	TG	M+NH4	824.807	20.9791	C52 H106 O5 N1	56462.3	44503.7	62130.7	11295.3	3.60303e+07	3.1055e+07	7.33446e+06	1.74498e+07	1.73876e+07	1.83688e+07	1.82453e+07	1.83987e+07	1.20394e+07	1.31478e+07	1.14268e+07	1.12666e+07
TG(16:0_16:0_17:1)	TG	M+NH4	836.77	20.0803	C52 H102 O6 N1	9.74106e+07	4.04917e+06	1.25697e+08	9.35555e+07	2.35842e+08	1.97653e+08	4.67777e+07	2.17089e+08	1.90781e+08	2.05358e+08	1.93222e+08	1.89048e+08	1.36276e+08	1.50863e+08	1.30911e+08	1.26057e+08
TG(18:1e_15:0_16:0)	TG	M+NH4	822.791	20.6144	C52 H104 O5 N1	61113.9	49036	187062	84242.3	2.40123e+07	1.97213e+07	5.24288e+06	1.40428e+07	1.74216e+07	1.86913e+07	1.7474e+07	1.76112e+07	1.06599e+07	1.1831e+07	1.0842e+07	9.65608e+06
TG(18:1_14:0_17:1)	TG	M+Na	839.71	19.6491	C52 H96 O6 Na1	6.45581e+06	277530	8.5202e+06	6.93665e+06	9.86926e+06	8.83153e+06	1.85975e+06	8.05463e+06	9.75814e+06	9.87332e+06	8.43259e+06	8.77188e+06	7.13664e+06	8.08283e+06	6.03157e+06	6.24157e+06
TG(16:1_16:1_17:1)	TG	M+NH4	832.739	19.226	C52 H98 O6 N1	6.5324e+06	232138	8.60388e+06	6.15636e+06	1.27601e+07	8.32215e+06	1.65782e+06	1.02535e+07	1.16255e+07	1.30967e+07	1.30928e+07	1.26491e+07	8.02029e+06	8.32734e+06	6.98254e+06	6.71936e+06
TG(15:0_16:0_18:3)	TG	M+H	815.712	20.1057	C52 H95 O6	1.44088e+06	369430	1.91882e+06	2.45461e+06	5.35087e+06	4.69354e+06	1.85064e+06	3.93469e+06	2.68547e+06	2.78336e+06	2.37598e+06	2.43139e+06	2.50315e+06	2.99037e+06	2.34031e+06	2.49568e+06
TG(15:0_14:0_20:4)	TG	M+H	813.697	19.6495	C52 H93 O6	3.3193e+06	178826	4.05668e+06	4.95297e+06	6.36943e+06	5.60028e+06	1.26024e+06	5.82223e+06	5.67096e+06	5.54325e+06	4.95373e+06	5.10131e+06	4.30727e+06	5.01801e+06	3.69262e+06	3.97156e+06
TG(18:0e_16:0_16:0)	TG	M+NH4	838.822	21.13	C53 H108 O5 N1	139884	99134.8	22412.8	23892.8	3.82671e+08	2.97125e+08	8.8014e+07	1.36938e+08	1.21542e+08	1.33613e+08	1.30112e+08	1.23709e+08	9.91652e+07	1.17312e+08	9.37402e+07	8.73791e+07
TG(16:0e_16:0_18:1)	TG	M+NH4	836.807	20.7802	C53 H106 O5 N1	419284	298648	175241	232661	5.13761e+08	4.27774e+08	1.18864e+08	2.46161e+08	2.50829e+08	2.68999e+08	2.65993e+08	2.64676e+08	1.76691e+08	2.07684e+08	1.73022e+08	1.65331e+08
TG(18:1e_16:0_16:0)	TG	M+NH4	836.807	21.039	C53 H106 O5 N1	4902.56	7834.59	2560.01	1535.09	1.68373e+07	1.07964e+07	2.82736e+06	7.39169e+06	3.04183e+06	2.20356e+06	2.57773e+06	3.72136e+06	2.75748e+06	3.36794e+06	2.68628e+06	2.95965e+06
TG(16:0_16:0_18:2)	TG	M+NH4	848.77	20.4	C53 H102 O6 N1	807832	211547	1.18252e+06	546867	986161	436782	92065.8	179670	1.45535e+06	407758	688978	152995	72891.7	1.07999e+06	500802	678903
TG(18:1e_16:0_16:1)	TG	M+NH4	834.791	20.4647	C53 H104 O5 N1	13974.9	104549	25130.2	0	1.02136e+08	8.4152e+07	2.08489e+07	6.27724e+07	8.37247e+07	9.27298e+07	8.5119e+07	8.97495e+07	4.51116e+07	5.38904e+07	4.61658e+07	4.40533e+07
TG(16:0_16:1_18:2)	TG	M+Na	851.71	19.4376	C53 H96 O6 Na1	1.79961e+07	3.80378e+06	2.22775e+07	1.97222e+07	2.50622e+07	2.28692e+07	5.33425e+06	1.35111e+07	2.24062e+07	2.29578e+07	2.05688e+07	2.09337e+07	1.69812e+07	2.01391e+07	1.58495e+07	1.30914e+07
TG(16:0_16:0_18:3)	TG	M+H	829.728	20.3219	C53 H97 O6	6.55793e+06	6.46186e+06	8.73604e+06	7.59306e+06	3.04401e+07	2.8679e+07	2.01813e+07	1.59359e+07	1.46655e+07	1.51839e+07	1.17444e+07	1.16587e+07	1.56502e+07	1.5945e+07	1.53924e+07	1.42107e+07
TG(16:0e_16:1_18:2)	TG	M+NH4	832.775	20.1393	C53 H102 O5 N1	0	0	0	0	1.0207e+07	8.02475e+06	1.7227e+06	6.64669e+06	1.12247e+07	1.13081e+07	1.05587e+07	1.08348e+07	5.40361e+06	5.76622e+06	5.11107e+06	4.58544e+06
TG(16:0e_16:0_18:3)	TG	M+H	815.749	20.83	C53 H99 O5	2524.98	1356.79	0	0	4.27716e+07	3.9646e+07	1.36895e+07	1.62853e+07	1.29185e+07	1.41349e+07	1.24644e+07	1.27994e+07	1.31693e+07	1.48038e+07	1.44552e+07	1.27508e+07
TG(16:1_16:1_18:2)	TG	M+Na	849.694	19.0602	C53 H94 O6 Na1	2.06738e+06	508798	2.13331e+06	1.4822e+06	3.07611e+06	2.7331e+06	538360	2.47927e+06	4.14757e+06	4.13889e+06	3.86977e+06	3.85918e+06	2.3674e+06	2.57445e+06	2.09076e+06	2.24435e+06
TG(16:0_14:0_20:4)	TG	M+H	827.712	19.8873	C53 H95 O6	2.18411e+07	3.86901e+06	2.75401e+07	2.55593e+07	4.68434e+07	4.60119e+07	2.01763e+07	3.35827e+07	2.979e+07	3.00389e+07	2.47904e+07	2.63672e+07	2.82223e+07	3.25531e+07	2.65264e+07	2.63994e+07
TG(6:0_20:4_24:1)	TG	M+Na	847.679	16.239	C53 H92 O6 Na1	1.97338e+06	11462.2	2.30824e+06	2.5198e+06	3.4524e+06	3.05083e+06	441967	3.58311e+06	1.56114e+06	2.66096e+06	1.49732e+06	1.42504e+06	1.78943e+06	1.70778e+06	1.94316e+06	1.28622e+06
TG(16:0_14:0_20:5)	TG	M+NH4	842.723	18.7888	C53 H96 O6 N1	3.72989e+06	95812.3	3.71499e+06	3.09104e+06	2.30544e+06	1.89298e+06	322898	1.97843e+06	4.76091e+06	5.57284e+06	4.5157e+06	4.61252e+06	3.39293e+06	1.8571e+06	1.91187e+06	1.92076e+06
TG(18:4_14:0_18:1)	TG	M+H	825.697	19.4217	C53 H93 O6	2.21466e+07	2.32011e+06	2.74001e+07	2.54587e+07	2.56133e+07	2.43795e+07	6.0021e+06	1.77e+07	2.0148e+07	2.13214e+07	1.83371e+07	1.92162e+07	1.76329e+07	2.04375e+07	1.58829e+07	1.55365e+07
TG(14:0_14:0_22:6)	TG	M+NH4	840.708	18.5432	C53 H94 O6 N1	1.55659e+06	11087.7	2.28632e+06	1.75281e+06	1.54067e+06	1.05357e+06	145938	1.33528e+06	1.06014e+06	986586	1.0518e+06	899661	842546	1.03789e+06	803331	726407
TG(16:1_14:0_20:5)	TG	M+H	823.681	18.963	C53 H91 O6	4.57092e+06	432040	5.88254e+06	4.86652e+06	3.9925e+06	3.40221e+06	611545	2.69168e+06	4.10528e+06	3.92388e+06	3.63403e+06	3.54946e+06	2.87087e+06	3.43105e+06	2.93703e+06	2.77601e+06
TG(12:0e_16:0_22:6)	TG	M+NH4	826.728	19.245	C53 H96 O5 N1	2.24282e+06	187529	2.7351e+06	2.3959e+06	394148	273478	23493.1	926531	427871	333192	420183	299060	182698	160814	1.5302e+06	1.53124e+06
TG(18:0_16:0_17:0)	TG	M+Na	871.773	20.8206	C54 H104 O6 Na1	1.28251e+06	202321	1.36863e+06	1.15358e+06	3.59034e+06	3.04562e+06	2.15671e+06	6.21994e+06	3.05713e+06	3.06926e+06	2.93651e+06	2.07703e+06	2.58053e+06	3.56952e+06	2.99916e+06	1.64586e+06
TG(18:0e_16:0_17:0)	TG	M+NH4	852.838	21.2687	C54 H110 O5 N1	118854	12166.5	171310	80789.7	2.41467e+07	1.98359e+07	4.86603e+06	1.3147e+07	1.25782e+07	1.4892e+07	1.33445e+07	1.35389e+07	7.8434e+06	8.9849e+06	7.94071e+06	7.8709e+06
TG(16:0_17:0_18:1)	TG	M+Na	869.757	20.46	C54 H102 O6 Na1	1.21265e+07	658789	1.47967e+07	1.21425e+07	2.66945e+07	2.27799e+07	7.11553e+06	2.77502e+07	2.04948e+07	2.20918e+07	1.91197e+07	1.98152e+07	1.59532e+07	1.84485e+07	1.60931e+07	1.58073e+07
TG(18:1e_16:0_17:0)	TG	M+NH4	850.822	20.9419	C54 H108 O5 N1	507769	14738.5	136553	48256.2	5.40352e+07	4.58574e+07	1.15225e+07	3.84073e+07	4.09784e+07	4.413e+07	4.46262e+07	4.40464e+07	2.49495e+07	2.80565e+07	2.34957e+07	2.26684e+07
TG(16:0_17:1_18:1)	TG	M+Na	867.741	20.0555	C54 H100 O6 Na1	1.5105e+07	1.08114e+06	1.86987e+07	1.66407e+07	2.58703e+07	2.62805e+07	7.41839e+06	2.29031e+07	2.26416e+07	2.37217e+07	1.97649e+07	1.91084e+07	1.92881e+07	2.19701e+07	1.81076e+07	1.71611e+07
TG(18:2e_16:0_17:0)	TG	M+NH4	848.807	20.5809	C54 H106 O5 N1	35497.6	32191	680708	72127.2	1.33047e+07	1.31562e+07	2.74312e+06	1.2138e+07	1.78178e+07	1.88953e+07	1.80266e+07	1.81854e+07	6.71962e+06	9.65163e+06	9.02841e+06	8.30034e+06
TG(16:1_17:1_18:1)	TG	M+Na	865.726	19.66	C54 H98 O6 Na1	4.04779e+06	356821	5.02113e+06	4.25795e+06	7.96667e+06	7.2146e+06	1.53524e+06	7.00255e+06	9.08772e+06	9.45069e+06	8.14501e+06	8.64709e+06	5.83729e+06	6.86743e+06	5.28084e+06	5.35797e+06
TG(16:0_17:0_18:3)	TG	M+H	843.744	20.4882	C54 H99 O6	2.8556e+06	251645	3.31608e+06	2.69593e+06	9.50942e+06	7.54735e+06	2.53362e+06	8.62189e+06	3.87354e+06	4.47604e+06	4.18634e+06	4.09929e+06	5.10072e+06	4.40417e+06	3.9776e+06	4.85041e+06
TG(16:1_17:1_18:2)	TG	M+NH4	858.755	19.2999	C54 H100 O6 N1	2.92085e+06	385998	6.91296e+06	2.28288e+06	7.63209e+06	8.61274e+06	893638	1.43728e+07	1.66015e+07	1.10936e+07	9.59876e+06	9.75647e+06	9.73004e+06	6.28188e+06	4.79262e+06	4.5915e+06
TG(15:0_16:0_20:4)	TG	M+NH4	858.755	19.5579	C54 H100 O6 N1	789818	16148.8	1.86353e+06	925959	1.67619e+06	1.92515e+06	267161	3.49728e+06	3.52969e+06	3.21158e+06	2.32693e+06	3.3637e+06	2.31847e+06	1.88189e+06	1.45708e+06	1.63726e+06
TG(15:0_18:1_18:3)	TG	M+H	841.728	20.0784	C54 H97 O6	1.35057e+07	617842	8.67432e+06	7.61877e+06	1.95051e+07	1.92162e+07	5.38437e+06	1.71146e+07	1.58081e+07	1.57969e+07	1.36829e+07	1.33355e+07	1.33102e+07	1.48833e+07	1.24447e+07	1.18985e+07
TG(14:0_17:1_20:4)	TG	M+NH4	856.739	19.0669	C54 H98 O6 N1	2.30863e+06	20910.8	2.81698e+06	2.13291e+06	2.09014e+06	1.32618e+06	301507	2.6151e+06	2.20166e+06	2.58373e+06	3.42401e+06	3.27685e+06	1.15423e+06	687239	822994	1.35301e+06
TG(16:1_17:1_18:3)	TG	M+H	839.712	19.64	C54 H95 O6	6.41926e+06	274059	8.45084e+06	6.87712e+06	9.74227e+06	8.74188e+06	1.85975e+06	8.05463e+06	9.67954e+06	9.79629e+06	8.36995e+06	8.66527e+06	7.10029e+06	7.74916e+06	6.0096e+06	6.20016e+06
TG(18:0e_16:0_18:0)	TG	M+NH4	866.854	21.4119	C55 H112 O5 N1	145805	21923	35218.4	69139.4	1.267e+08	1.02201e+08	2.66743e+07	5.51437e+07	4.04364e+07	4.45238e+07	4.21717e+07	4.33862e+07	3.24563e+07	3.63201e+07	3.12945e+07	3.02639e+07
TG(18:0e_16:0_18:1)	TG	M+NH4	864.838	21.0947	C55 H110 O5 N1	339727	278601	362620	267622	3.5087e+08	2.95226e+08	8.11299e+07	2.22393e+08	2.15506e+08	2.328e+08	2.30136e+08	2.19927e+08	1.38445e+08	1.50921e+08	1.30183e+08	1.27899e+08
TG(18:0_16:1_18:1)	TG	M+NH4	876.801	20.5578	C55 H106 O6 N1	1.14144e+08	4.32848e+07	0	1.13229e+08	3.71108e+08	3.1243e+08	1.01739e+08	3.16852e+08	2.95729e+08	3.03783e+08	2.78909e+08	2.91374e+08	2.13859e+08	1.98368e+08	2.02287e+08	1.97976e+08
TG(18:1e_16:0_18:1)	TG	M+NH4	862.822	20.7572	C55 H108 O5 N1	388767	272509	248899	214116	2.01624e+08	1.65622e+08	4.55422e+07	1.3057e+08	2.04861e+08	2.14719e+08	2.12801e+08	2.11656e+08	1.10181e+08	1.27321e+08	1.07777e+08	1.01721e+08
TG(16:0_18:1_18:2)	TG	M+NH4	874.786	19.8708	C55 H104 O6 N1	5.41318e+08	1.98728e+08	6.15689e+08	5.13176e+08	7.91957e+08	6.63579e+08	1.49171e+08	5.39889e+08	7.07416e+08	6.54144e+08	5.43897e+08	6.5894e+08	5.39438e+08	6.11639e+08	4.4554e+08	5.10092e+08
TG(16:0e_16:0_20:3)	TG	M+NH4	860.807	20.4501	C55 H106 O5 N1	15462.2	52008.7	52043.5	149913	4.81962e+07	3.91792e+07	1.08407e+07	3.26179e+07	6.12691e+07	6.69803e+07	6.21066e+07	6.5153e+07	2.26375e+07	3.46739e+07	2.93846e+07	2.13167e+07
TG(16:1_18:1_18:2)	TG	M+Na	877.726	19.513	C55 H98 O6 Na1	6.63059e+06	8.75595e+06	5.33148e+06	6.9742e+06	1.29748e+07	1.00077e+07	3.34812e+06	1.05876e+07	1.80128e+07	1.576e+07	1.55932e+07	1.41506e+07	1.19145e+07	1.13273e+07	9.41787e+06	9.84517e+06
TG(16:0_16:0_20:4)	TG	M+NH4	872.77	19.7723	C55 H102 O6 N1	1.57747e+07	1.107e+06	1.95467e+07	1.50011e+07	5.42175e+07	3.9426e+07	8.75299e+06	5.22736e+07	4.87059e+07	5.33483e+07	5.01897e+07	5.08495e+07	3.01918e+07	3.34252e+07	2.77699e+07	2.76499e+07
TG(16:0_18:1_18:3)	TG	M+H	855.744	20.2785	C55 H99 O6	2.45104e+07	9.97133e+06	2.91469e+07	2.92487e+07	5.67412e+07	5.50895e+07	3.38998e+07	4.43472e+07	4.36362e+07	4.35191e+07	3.56345e+07	3.7574e+07	3.98706e+07	4.16595e+07	3.80498e+07	3.62911e+07
TG(16:0e_16:0_20:4)	TG	M+NH4	858.791	20.1117	C55 H104 O5 N1	76961.5	27516.4	0	24604.5	7.55888e+06	5.45769e+06	1.08779e+06	3.97507e+06	8.68814e+06	9.08763e+06	1.05426e+07	8.53434e+06	3.76271e+06	4.20765e+06	4.07289e+06	2.98393e+06
TG(16:1_18:2_18:2)	TG	M+NH4	870.755	19.2889	C55 H100 O6 N1	3.77705e+07	1.01308e+06	2.50685e+07	3.19289e+07	2.93704e+07	1.86068e+07	3.48497e+06	4.72648e+07	4.79202e+07	2.31889e+07	2.40712e+07	5.06965e+07	3.30088e+07	3.50793e+07	3.10694e+07	3.03078e+07
TG(18:1_14:0_20:4)	TG	M+H	853.728	19.8647	C55 H97 O6	4.36467e+07	1.23815e+07	5.16163e+07	5.05696e+07	6.78249e+07	6.79593e+07	2.72462e+07	4.56102e+07	5.28954e+07	5.25716e+07	4.33245e+07	4.65411e+07	4.83693e+07	5.65181e+07	4.52783e+07	4.31751e+07
TG(16:0_14:0_22:6)	TG	M+Na	873.694	18.9165	C55 H94 O6 Na1	906250	6089.06	1.07764e+06	952628	1.7461e+06	828329	178812	981012	1.72245e+06	1.78632e+06	1.13349e+06	1.58217e+06	1.40396e+06	1.56475e+06	907461	1.16333e+06
TG(18:4_16:0_18:2)	TG	M+H	851.712	19.4366	C55 H95 O6	1.77838e+07	3.54342e+06	2.16128e+07	1.94796e+07	2.4532e+07	2.2562e+07	5.2638e+06	1.3241e+07	2.22196e+07	2.26494e+07	2.03798e+07	2.06056e+07	1.71772e+07	2.02582e+07	1.56645e+07	1.29091e+07
TG(16:0e_14:0_22:6)	TG	M+NH4	854.76	19.7828	C55 H100 O5 N1	9.98159e+06	2.92124e+06	1.19278e+07	1.19905e+07	1.70774e+07	1.55593e+07	6.85653e+06	1.04786e+07	1.16957e+07	1.27547e+07	9.68293e+06	1.08697e+07	1.04671e+07	1.25588e+07	9.7096e+06	1.11272e+07
TG(16:1_14:0_22:6)	TG	M+NH4	866.723	18.5633	C55 H96 O6 N1	2.37459e+06	27452.6	3.26592e+06	2.81787e+06	2.44364e+06	1.81358e+06	245041	1.52048e+06	1.89603e+06	2.26485e+06	2.10485e+06	1.81182e+06	1.58694e+06	1.73768e+06	1.23803e+06	1.32631e+06
TG(14:0_18:2_20:5)	TG	M+H	849.697	19.0614	C55 H93 O6	1.39527e+06	516847	1.79e+06	1.32102e+06	3.22022e+06	2.2637e+06	457638	2.89824e+06	4.38896e+06	4.47406e+06	3.98718e+06	4.2668e+06	2.19302e+06	2.73545e+06	2.23177e+06	388344
TG(14:0_18:3_20:4)	TG	M+H	849.697	19.313	C55 H93 O6	978585	41329.3	1.27132e+06	1.05544e+06	4.23302e+06	2.10413e+06	349613	3.21905e+06	7.30727e+06	2.9375e+06	2.54911e+06	6.74523e+06	1.79911e+06	5.07117e+06	1.30146e+06	3.91084e+06
TG(18:0_16:0_19:0)	TG	M+NH4	894.848	21.1212	C56 H112 O6 N1	6.67193e+06	2.1241e+06	7.75988e+06	5.80297e+06	3.95989e+07	3.01888e+07	1.09228e+07	3.5568e+07	1.57813e+07	1.7213e+07	1.62319e+07	1.55079e+07	1.5322e+07	1.72592e+07	1.49562e+07	1.43313e+07
TG(20:0e_16:0_17:0)	TG	M+NH4	880.869	21.5295	C56 H114 O5 N1	60490.8	75474.5	382194	145520	6.06003e+06	4.36231e+06	1.49094e+06	3.24919e+06	2.42755e+06	2.73499e+06	2.9545e+06	2.91967e+06	1.83404e+06	2.52263e+06	1.80581e+06	1.65123e+06
TG(19:1_16:0_18:0)	TG	M+NH4	892.833	20.7901	C56 H110 O6 N1	5.7701e+07	2.46112e+06	6.72535e+07	4.70977e+07	1.64475e+08	1.38723e+08	3.87547e+07	2.05497e+08	1.31828e+08	1.37831e+08	1.34766e+08	1.38906e+08	9.88664e+07	1.1203e+08	9.45988e+07	8.91082e+07
TG(18:1e_16:0_19:0)	TG	M+NH4	878.854	21.228	C56 H112 O5 N1	148632	32821.6	171173	242535	2.64051e+07	2.30554e+07	5.72055e+06	2.16992e+07	2.12837e+07	2.24083e+07	2.23524e+07	2.25027e+07	1.01099e+07	1.17498e+07	1.2062e+07	1.09703e+07
TG(17:0_18:1_18:1)	TG	M+Na	895.773	20.4267	C56 H104 O6 Na1	1.66647e+07	732745	2.01536e+07	1.71991e+07	2.33799e+07	1.97251e+07	6.0933e+06	2.50771e+07	2.11628e+07	2.30697e+07	2.00811e+07	2.05959e+07	1.68498e+07	1.92663e+07	1.70816e+07	1.66133e+07
TG(20:2e_16:0_17:0)	TG	M+NH4	876.838	20.8979	C56 H110 O5 N1	934335	241093	364141	683783	1.93702e+07	1.24929e+07	2.96932e+06	1.03516e+07	2.11266e+07	2.07979e+07	2.13741e+07	2.18135e+07	1.1345e+07	1.22376e+07	1.00864e+07	9.21115e+06
TG(18:1_17:1_18:1)	TG	M+NH4	888.801	20.0479	C56 H106 O6 N1	9.25451e+07	6.08728e+06	1.16162e+08	9.01875e+07	1.65129e+08	1.39009e+08	3.39068e+07	1.6043e+08	1.74596e+08	1.90329e+08	1.82508e+08	1.76558e+08	1.19387e+08	1.31055e+08	1.10496e+08	1.08301e+08
TG(18:0_17:0_18:3)	TG	M+H	871.775	20.8331	C56 H103 O6	1.27082e+06	201179	1.33972e+06	1.14981e+06	5.77899e+06	2.99463e+06	2.03166e+06	6.13693e+06	2.07436e+06	3.0021e+06	2.87477e+06	2.89754e+06	2.1371e+06	3.43392e+06	2.20888e+06	1.51867e+06
TG(18:1e_17:1_18:1)	TG	M+NH4	874.822	20.5865	C56 H108 O5 N1	160176	74551	64767.3	176194	6.71747e+06	5.09705e+06	1.27077e+06	5.3736e+06	7.20157e+06	1.0485e+07	5.6764e+06	682517	4.25684e+06	5.3571e+06	4.7373e+06	4.21397e+06
TG(18:1_17:1_18:2)	TG	M+NH4	886.786	19.6702	C56 H104 O6 N1	8.8775e+06	1.71702e+06	1.20203e+07	9.71885e+06	3.56107e+07	2.68935e+07	5.14034e+06	3.71594e+07	4.93161e+07	5.4154e+07	4.99207e+07	5.15983e+07	2.82654e+07	2.67397e+07	2.41052e+07	2.31415e+07
TG(16:0_17:0_20:4)	TG	M+H	869.759	20.4634	C56 H101 O6	1.21269e+07	659776	1.47968e+07	1.21442e+07	2.66945e+07	2.27812e+07	7.11587e+06	2.77508e+07	2.04697e+07	2.20856e+07	1.90823e+07	1.98015e+07	1.59394e+07	1.84422e+07	1.60936e+07	1.57992e+07
TG(16:0_17:1_20:4)	TG	M+NH4	884.77	19.5123	C56 H102 O6 N1	736983	61442.6	1.29823e+06	556024	1.35436e+06	1.27982e+06	286911	1.19155e+06	1.11205e+06	1.28158e+06	1.40446e+06	1.94303e+06	1.24911e+06	1.58792e+06	1.13825e+06	642535
TG(15:0_18:1_20:4)	TG	M+H	867.744	20.0618	C56 H99 O6	1.51061e+07	1.08157e+06	1.87195e+07	1.66407e+07	2.58699e+07	2.62825e+07	7.41633e+06	2.29046e+07	2.26431e+07	2.37217e+07	1.97666e+07	1.91079e+07	1.92858e+07	2.19687e+07	1.81102e+07	1.71586e+07
TG(15:0_16:0_22:6)	TG	M+NH4	882.755	19.2548	C56 H100 O6 N1	545142	70871.1	736447	422521	2.98762e+06	2.29894e+06	639910	2.66311e+06	461427	2.35791e+06	3.72269e+06	1.95666e+06	1.03649e+06	972517	1.41351e+06	119450
TG(18:4_17:1_18:1)	TG	M+H	865.728	19.6579	C56 H97 O6	4.03162e+06	355145	4.9901e+06	4.19563e+06	7.82286e+06	7.14375e+06	1.50834e+06	6.91281e+06	9.0221e+06	9.36691e+06	8.1107e+06	8.58237e+06	5.81943e+06	6.84099e+06	5.27088e+06	5.32772e+06
TG(14:0_17:1_22:6)	TG	M+NH4	880.739	18.7096	C56 H98 O6 N1	1.44194e+08	2.98779e+06	1.97319e+08	1.63725e+08	1.00856e+08	7.50047e+07	1.29161e+07	5.45217e+07	4.58369e+07	4.45929e+07	4.71103e+07	4.65335e+07	6.14556e+07	6.60332e+07	5.6644e+07	5.14682e+07
TG(18:0e_16:0_20:0)	TG	M+NH4	894.885	21.6683	C57 H116 O5 N1	226345	5382.84	242234	171262	3.59416e+07	3.03665e+07	7.39305e+06	1.71174e+07	8.30191e+06	9.67884e+06	9.1967e+06	9.46372e+06	8.90393e+06	9.60335e+06	8.51576e+06	8.06432e+06
TG(18:0_18:0_18:1)	TG	M+NH4	906.848	20.9478	C57 H112 O6 N1	1.25721e+08	7.90906e+06	1.44522e+08	1.06405e+08	5.43858e+08	4.85866e+08	1.25494e+08	5.55256e+08	2.81948e+08	3.08944e+08	3.05644e+08	3.08452e+08	2.67622e+08	2.91622e+08	2.48421e+08	2.30295e+08
TG(18:0e_16:0_20:1)	TG	M+NH4	892.869	21.3687	C57 H114 O5 N1	859324	129625	1.2576e+06	2.70392e+06	1.01274e+08	8.29292e+07	1.98933e+07	6.31935e+07	5.26244e+07	5.41492e+07	5.49434e+07	5.75102e+07	3.53119e+07	3.75741e+07	3.3115e+07	3.34966e+07
TG(20:1e_16:0_18:1)	TG	M+NH4	890.854	21.073	C57 H112 O5 N1	164881	128284	69341.1	91882.8	7.41507e+07	5.8824e+07	1.52148e+07	5.01319e+07	6.90744e+07	7.32506e+07	7.4335e+07	7.13092e+07	3.85691e+07	4.151e+07	3.62653e+07	3.46866e+07
TG(18:0_16:0_20:3)	TG	M+H	885.791	20.991	C57 H105 O6	1.92971e+07	2.03064e+07	2.56227e+07	2.00504e+07	4.9324e+07	4.37352e+07	2.96368e+07	2.76914e+07	2.77936e+07	3.28717e+07	2.94441e+07	2.41323e+07	2.97735e+07	3.363e+07	2.7994e+07	2.74351e+07
TG(16:0e_16:0_22:3)	TG	M+NH4	888.838	20.7751	C57 H110 O5 N1	46941.4	235164	51983.1	37257.6	3.29918e+07	2.55734e+07	6.90217e+06	2.72413e+07	4.59539e+07	7.26975e+07	6.32439e+07	4.77329e+07	1.13397e+06	3.39087e+07	2.43965e+07	2.36109e+07
TG(18:0_16:0_20:4)	TG	M+H	883.775	20.6337	C57 H103 O6	2.13322e+07	3.82325e+06	2.42525e+07	2.28075e+07	5.70061e+07	5.58994e+07	2.86141e+07	4.89412e+07	4.48188e+07	4.37362e+07	4.01076e+07	4.11225e+07	4.06091e+07	4.47918e+07	4.04862e+07	3.67908e+07
TG(18:0e_16:0_20:4)	TG	M+NH4	886.822	20.5709	C57 H108 O5 N1	184200	67498.6	234752	204141	2.68243e+07	2.28379e+07	3.1398e+06	1.79547e+07	2.43154e+07	2.91788e+07	2.89884e+07	2.55678e+07	1.10572e+07	1.27187e+07	2.14012e+07	1.93775e+07
TG(16:0_18:1_20:4)	TG	M+H	881.759	20.2326	C57 H101 O6	5.24613e+07	2.68344e+07	6.13607e+07	6.12928e+07	7.45988e+07	5.45767e+07	3.82741e+07	6.09228e+07	6.2635e+07	6.27257e+07	5.09597e+07	5.40175e+07	5.65412e+07	6.39323e+07	5.46013e+07	5.20744e+07
TG(18:1e_16:0_20:4)	TG	M+NH4	884.807	20.3122	C57 H106 O5 N1	166366	91793.8	273378	431390	5.94676e+06	5.94052e+06	1.2238e+06	2.36661e+06	1.11024e+07	1.19999e+07	1.23822e+07	1.15134e+07	5.54726e+06	6.4896e+06	1.1991e+07	4.9643e+06
TG(16:0e_16:0_22:5)	TG	M+NH4	884.807	20.638	C57 H106 O5 N1	5.48525e+06	1.11255e+06	6.18182e+06	6.20103e+06	1.42029e+07	1.4167e+07	7.70671e+06	1.28784e+07	1.11376e+07	1.11737e+07	9.89584e+06	1.05017e+07	9.9775e+06	1.08222e+07	1.0053e+07	9.08854e+06
TG(18:2_18:2_18:2)	TG	M+NH4	896.77	19.1789	C57 H102 O6 N1	125399	27079.9	599658	62717.4	1.64668e+07	1.05845e+07	2.97027e+06	1.27179e+07	2.00811e+07	1.6563e+07	1.63107e+07	1.77246e+07	5.43356e+07	211938	5.43983e+07	5.04846e+07
TG(16:0_16:0_22:6)	TG	M+H	879.744	19.9022	C57 H99 O6	4.12461e+07	2.83368e+07	4.54445e+07	4.66192e+07	3.53422e+07	4.91221e+07	2.08436e+07	3.78509e+07	4.59355e+07	4.68439e+07	3.86807e+07	3.95804e+07	4.07046e+07	4.85117e+07	3.97972e+07	3.88688e+07
TG(16:0e_16:0_22:6)	TG	M+NH4	882.791	20.0737	C57 H104 O5 N1	1.24525e+07	6.63621e+06	127649	1.44607e+07	4.53893e+07	3.82208e+07	8.91858e+06	1.6169e+07	2.18382e+07	2.48857e+07	2.29451e+07	2.47565e+07	2.19835e+07	1.5407e+07	1.30708e+07	1.24424e+07
TG(18:1_14:0_22:6)	TG	M+NH4	894.755	19.0806	C57 H100 O6 N1	2.64341e+07	800315	3.13226e+07	2.35509e+07	5.46915e+07	3.69747e+07	7.23369e+06	3.51836e+07	4.05751e+07	4.46112e+07	4.26594e+07	4.2522e+07	2.78122e+07	2.91526e+07	2.63412e+07	2.63907e+07
TG(16:0_18:2_20:5)	TG	M+H	877.728	19.5075	C57 H97 O6	6.87303e+06	8.76553e+06	5.2987e+06	7.25282e+06	1.29242e+07	1.02841e+07	3.40638e+06	1.06438e+07	1.85718e+07	1.58328e+07	1.58091e+07	1.44521e+07	1.03802e+07	1.12211e+07	9.87986e+06	1.0189e+07
TG(16:0e_16:1_22:6)	TG	M+NH4	880.775	19.7938	C57 H102 O5 N1	9.67385e+06	6.72955e+06	1.01922e+07	1.10584e+07	2.7746e+06	4.01463e+06	3.04685e+06	7.15967e+06	5.03737e+06	5.47311e+06	1.78227e+06	6.24449e+06	5.27497e+06	5.09009e+06	5.38465e+06	3.77055e+06
TG(16:1_16:1_22:6)	TG	M+NH4	892.739	18.5949	C57 H98 O6 N1	1.96661e+06	6996.77	3.61114e+06	2.54173e+06	4.10004e+06	2.68055e+06	429008	2.81577e+06	3.82384e+06	4.0547e+06	3.94022e+06	3.92366e+06	2.47387e+06	2.81611e+06	2.18273e+06	1.86732e+06
TG(14:0_20:4_20:4)	TG	M+H	875.712	19.2985	C57 H95 O6	3.73763e+06	206223	4.29888e+06	3.974e+06	7.23356e+06	7.85876e+06	994592	3.97773e+06	4.44938e+06	4.69586e+06	4.9779e+06	9.54062e+06	3.2885e+06	3.75183e+06	4.48939e+06	2.7186e+06
TG(15:0_16:0_24:0)	TG	M+NH4	922.88	21.3954	C58 H116 O6 N1	4.12261e+06	951154	4.45784e+06	3.2811e+06	1.78211e+07	1.39509e+07	4.18398e+06	1.5397e+07	4.47757e+06	4.94471e+06	4.76049e+06	4.8008e+06	6.02652e+06	6.594e+06	5.68353e+06	5.75814e+06
TG(16:0e_16:0_23:0)	TG	M+NH4	908.9	21.775	C58 H118 O5 N1	28786.7	36244	21761.5	44384.9	2.22283e+06	1.50972e+06	75867.4	889733	80706.5	127198	276020	78939.1	106684	94912.7	51140.3	67711.7
TG(18:0_16:0_21:1)	TG	M+NH4	920.864	21.0778	C58 H114 O6 N1	2.01635e+07	324697	2.37007e+07	1.73568e+07	5.07611e+07	4.24302e+07	1.19317e+07	6.71389e+07	3.11356e+07	3.32793e+07	3.34392e+07	3.19542e+07	2.81217e+07	3.04702e+07	2.66809e+07	2.58945e+07
TG(18:1e_16:0_21:0)	TG	M+NH4	906.885	21.4899	C58 H116 O5 N1	154086	22154.1	132006	74646.9	8.88261e+06	8.18106e+06	1.78544e+06	5.85842e+06	5.32396e+06	6.09756e+06	5.82138e+06	5.9634e+06	3.44515e+06	4.31184e+06	3.08332e+06	3.3967e+06
TG(17:0_18:1_20:1)	TG	M+NH4	918.848	20.754	C58 H112 O6 N1	7.87253e+07	2.59282e+06	9.22433e+07	6.63693e+07	1.12975e+08	9.41948e+07	2.58845e+07	1.45951e+08	1.08508e+08	1.1661e+08	1.14079e+08	1.13844e+08	8.28268e+07	9.45479e+07	7.9156e+07	7.44602e+07
TG(18:1e_16:0_21:1)	TG	M+NH4	904.869	21.2047	C58 H114 O5 N1	145894	64751.5	192610	426307	5.11093e+06	6.73113e+06	1.1768e+06	7.58753e+06	9.30084e+06	9.18774e+06	8.85352e+06	8.59562e+06	3.77232e+06	4.57559e+06	4.32876e+06	4.36266e+06
TG(19:1_18:1_18:1)	TG	M+Na	921.788	20.4019	C58 H106 O6 Na1	7.91982e+06	285955	9.88306e+06	8.21263e+06	7.29254e+06	6.05306e+06	1.96005e+06	8.32694e+06	7.76961e+06	7.88139e+06	7.64232e+06	7.30283e+06	6.16424e+06	7.23298e+06	6.09355e+06	6.11244e+06
TG(18:1e_18:1_19:1)	TG	M+NH4	902.854	20.9197	C58 H112 O5 N1	214899	13203.8	99883.8	225755	4.10402e+06	4.18898e+06	400879	4.18818e+06	6.68853e+06	8.39675e+06	7.81788e+06	7.64041e+06	3.59448e+06	3.755e+06	2.78048e+06	3.2761e+06
TG(19:1_18:1_18:2)	TG	M+NH4	914.817	20.0756	C58 H108 O6 N1	2.23499e+07	1.05193e+06	2.0943e+07	1.72327e+07	4.04277e+07	3.32684e+07	7.74625e+06	5.11122e+07	5.79479e+07	6.91966e+07	6.10332e+07	6.24772e+07	3.70739e+07	3.60834e+07	3.83448e+07	3.0927e+07
TG(18:0_17:0_20:4)	TG	M+H	897.791	20.7862	C58 H105 O6	4.08404e+06	113020	4.60342e+06	3.75457e+06	7.56498e+06	7.05526e+06	2.55072e+06	1.12526e+07	7.03788e+06	7.45779e+06	6.94871e+06	6.71925e+06	6.06735e+06	7.44486e+06	6.35518e+06	5.77096e+06
TG(18:1_17:1_20:3)	TG	M+NH4	912.801	19.8355	C58 H106 O6 N1	1.7761e+07	824854	2.24924e+07	1.89108e+07	2.73399e+07	2.05621e+07	3.0639e+06	3.38832e+07	3.95903e+07	3.94603e+07	3.73022e+07	3.83807e+07	2.29828e+07	2.45328e+07	2.0916e+07	2.21949e+07
TG(17:0_18:1_20:4)	TG	M+H	895.775	20.4226	C58 H103 O6	1.66182e+07	733684	2.01421e+07	1.71792e+07	2.33222e+07	1.96774e+07	6.10844e+06	2.50374e+07	2.10925e+07	2.30508e+07	2.00604e+07	2.05561e+07	1.6811e+07	1.9221e+07	1.70182e+07	1.65887e+07
TG(18:0e_17:1_20:4)	TG	M+NH4	898.822	20.405	C58 H108 O5 N1	84316.9	36776.4	113922	65651.1	2.30479e+06	2.0493e+06	496262	2.35364e+06	7.01185e+06	7.38944e+06	6.70841e+06	6.87196e+06	2.71074e+06	2.97385e+06	2.84091e+06	2.32275e+06
TG(16:0_17:0_22:6)	TG	M+NH4	910.786	19.5161	C58 H104 O6 N1	1.1466e+07	231112	1.50266e+07	5.55512e+06	7.76876e+06	5.84128e+06	1.3893e+06	8.14487e+06	2.09569e+07	9.04785e+06	8.60604e+06	1.97661e+07	5.3281e+06	1.42839e+07	1.1099e+07	1.19313e+07
TG(16:0_17:1_22:6)	TG	M+NH4	908.77	19.3125	C58 H102 O6 N1	4.72748e+06	103785	5.44914e+06	5.62226e+06	1.28618e+07	1.09466e+07	1.69082e+06	1.02743e+07	1.16037e+07	1.23845e+07	1.24741e+07	1.19373e+07	6.9931e+06	9.70914e+06	7.20588e+06	6.96433e+06
TG(16:0e_17:1_22:6)	TG	M+NH4	894.791	19.9436	C58 H104 O5 N1	187749	12479.9	293779	266750	1.68692e+06	1.10493e+06	153284	1.16668e+06	1.64785e+06	1.84927e+06	1.68946e+06	1.94841e+06	662697	1.29545e+06	949425	444747
TG(16:1_17:1_22:6)	TG	M+NH4	906.755	18.855	C58 H100 O6 N1	610720	0	926319	670365	2.07687e+06	1.37075e+06	26978.9	1.48093e+06	2.07193e+06	2.13819e+06	2.18367e+06	2.01872e+06	1.1901e+06	1.17708e+06	1.02723e+06	941245
TG(16:0_16:0_24:0)	TG	M+NH4	936.895	21.5242	C59 H118 O6 N1	2.14738e+07	4.15043e+06	2.55312e+07	1.80323e+07	1.77927e+08	1.39881e+08	4.17651e+07	1.11433e+08	2.25604e+07	2.62734e+07	2.37696e+07	2.48515e+07	4.54774e+07	4.58184e+07	4.36184e+07	4.2257e+07
TG(16:0e_16:0_24:0)	TG	M+NH4	922.916	21.9028	C59 H120 O5 N1	85563.7	1244.58	77503.9	56116.8	3.59707e+07	2.77395e+07	6.88455e+06	1.35274e+07	4.0846e+06	4.84567e+06	4.72887e+06	4.93326e+06	6.51861e+06	7.08488e+06	6.37091e+06	6.25024e+06
TG(16:0_16:0_24:1)	TG	M+Na	939.835	21.2275	C59 H112 O6 Na1	5.66024e+06	106515	6.07496e+06	4.92679e+06	1.60061e+07	1.49209e+07	3.66309e+06	1.64633e+07	6.11145e+06	6.71049e+06	5.98615e+06	6.35265e+06	7.44536e+06	8.24832e+06	6.89161e+06	7.30311e+06
TG(16:1_18:3_22:6)	TG	M+H	899.712	19.0845	C59 H95 O6	4.14814e+06	120618	5.49025e+06	4.37684e+06	9.02446e+06	6.46013e+06	1.33723e+06	4.63097e+06	6.44234e+06	6.83795e+06	7.86015e+06	5.96745e+06	4.14549e+06	5.28177e+06	4.2985e+06	4.33567e+06
TG(16:0e_16:0_24:1)	TG	M+NH4	920.9	21.6199	C59 H118 O5 N1	616888	18536.8	690571	450219	6.12684e+07	5.00167e+07	1.23251e+07	3.67558e+07	2.20814e+07	2.42288e+07	2.38663e+07	2.54705e+07	1.86795e+07	1.91577e+07	1.73177e+07	1.69337e+07
TG(18:0_18:1_20:1)	TG	M+NH4	932.864	20.9132	C59 H114 O6 N1	2.37738e+08	9.27722e+06	2.7734e+08	1.98181e+08	3.31445e+08	2.66891e+08	7.16394e+07	3.81578e+08	2.29519e+08	2.51633e+08	2.48209e+08	2.37507e+08	2.14502e+08	2.32063e+08	1.97519e+08	1.95606e+08
TG(18:1e_16:0_22:1)	TG	M+NH4	918.885	21.3488	C59 H116 O5 N1	146956	5029.6	170354	142797	3.81231e+07	3.07261e+07	7.25659e+06	2.628e+07	2.66004e+07	2.92832e+07	2.87373e+07	2.95326e+07	1.5793e+07	1.66087e+07	1.43514e+07	1.4758e+07
TG(20:1_18:1_18:1)	TG	M+NH4	930.848	20.5707	C59 H112 O6 N1	4.03888e+08	2.17645e+07	4.97814e+08	3.76934e+08	3.299e+08	2.81611e+08	7.80848e+07	3.46492e+08	3.02051e+08	3.06101e+08	3.13115e+08	3.18952e+08	2.34323e+08	2.60204e+08	2.66821e+08	2.08076e+08
TG(18:0_18:0_20:3)	TG	M+H	913.822	21.2668	C59 H109 O6	9.37558e+06	9.02179e+06	1.12676e+07	8.95401e+06	1.86717e+07	1.49039e+07	1.06852e+07	8.24391e+06	1.16157e+07	1.29892e+07	1.02259e+07	1.01088e+07	1.02531e+07	1.17864e+07	1.0038e+07	1.02862e+07
TG(18:0e_16:0_22:3)	TG	M+NH4	916.869	21.0798	C59 H114 O5 N1	40652.8	63088.1	46629.5	34854.6	2.23496e+07	1.43508e+07	4.44505e+06	1.86034e+07	2.80787e+07	3.01141e+07	3.08864e+07	2.90336e+07	1.39724e+07	1.52651e+07	1.33337e+07	1.2938e+07
TG(18:1_18:1_20:2)	TG	M+NH4	928.833	20.3439	C59 H110 O6 N1	1.24723e+08	1.21809e+07	9.95617e+07	7.77319e+07	7.49082e+07	6.48067e+07	4.89592e+07	2.42349e+08	1.72409e+08	1.85986e+08	1.67674e+08	1.80981e+08	1.06931e+08	1.14872e+08	9.81566e+07	1.01175e+08
TG(18:0_16:0_22:4)	TG	M+H	911.806	20.9412	C59 H107 O6	9.51532e+06	619421	1.07205e+07	8.69052e+06	3.4004e+07	3.19754e+07	1.07882e+07	3.24398e+07	2.10409e+07	2.12571e+07	2.05241e+07	1.9097e+07	1.95361e+07	2.18237e+07	1.80917e+07	1.80334e+07
TG(18:0e_16:0_22:4)	TG	M+NH4	914.854	20.8598	C59 H112 O5 N1	151467	2274.41	188410	132390	1.68747e+07	1.33665e+07	3.27118e+06	1.70281e+07	5.37164e+07	5.99174e+07	5.82606e+07	5.72039e+07	2.44904e+07	2.66629e+07	2.23333e+07	2.22038e+07
TG(18:1_18:1_20:3)	TG	M+NH4	926.817	19.7167	C59 H108 O6 N1	4.79557e+07	1.69516e+06	6.1286e+07	4.70971e+07	4.18073e+07	3.18258e+07	8.70478e+06	3.70653e+07	5.01038e+07	5.28818e+07	5.71459e+07	6.12484e+07	3.72651e+07	3.85086e+07	3.30178e+07	3.07341e+07
TG(16:0_18:1_22:4)	TG	M+H	909.791	20.5859	C59 H105 O6	3.97459e+07	6.0704e+06	4.55353e+07	4.27703e+07	4.59425e+07	4.30975e+07	2.01358e+07	4.30392e+07	4.16772e+07	4.01573e+07	3.72648e+07	3.79041e+07	3.87547e+07	4.08348e+07	3.7457e+07	3.50031e+07
TG(20:1e_16:0_20:4)	TG	M+NH4	912.838	20.5758	C59 H110 O5 N1	348495	22910.1	272791	157690	4.24537e+07	2.90501e+07	7.21227e+06	2.68171e+07	6.66725e+07	8.20776e+07	7.98543e+07	6.66357e+07	3.00909e+07	3.89493e+07	3.11698e+07	2.81815e+07
TG(18:1_18:1_20:4)	TG	M+Na	929.757	19.7163	C59 H102 O6 Na1	2.22285e+07	1.39841e+06	2.89853e+07	2.51085e+07	1.50484e+07	6.94206e+06	1.59621e+06	1.42416e+07	2.01903e+07	2.50972e+07	2.0375e+07	1.62222e+07	1.87856e+07	2.24146e+07	1.68435e+07	1.66338e+07
TG(18:0_16:0_22:6)	TG	M+NH4	924.801	20.0461	C59 H106 O6 N1	8.85086e+06	480802	1.10238e+07	8.80644e+06	5.23656e+07	4.47011e+07	9.77152e+06	4.84817e+07	3.81753e+07	4.05972e+07	3.87044e+07	3.70749e+07	2.61188e+07	2.83462e+07	2.44069e+07	2.28345e+07
TG(18:0e_16:0_22:6)	TG	M+NH4	910.822	20.3698	C59 H108 O5 N1	21440.5	10994.2	98159.9	147742	4.3204e+07	3.35161e+07	9.10543e+06	2.39982e+07	1.54826e+07	1.8593e+07	1.85461e+07	1.62886e+07	1.57737e+07	1.455e+07	1.1986e+07	1.09553e+07
TG(16:0_18:1_22:6)	TG	M+H	905.759	19.9395	C59 H101 O6	8.6634e+06	1.28089e+07	7.5801e+06	9.68139e+06	1.1936e+07	1.37212e+07	7.95586e+06	1.34394e+07	1.97896e+07	2.4524e+07	1.75411e+07	1.43814e+07	1.75384e+07	1.40694e+07	1.31582e+07	1.56431e+07
TG(16:0e_18:1_22:6)	TG	M+NH4	908.807	20.1053	C59 H106 O5 N1	1.06117e+07	3.42496e+06	1.28218e+07	1.19992e+07	2.72471e+07	2.69171e+07	7.79024e+06	1.55978e+07	3.57927e+07	3.45301e+07	4.22351e+07	4.2502e+07	1.93989e+07	2.05954e+07	1.10555e+07	1.19472e+07
TG(16:0_18:2_22:6)	TG	M+NH4	920.77	19.1103	C59 H102 O6 N1	2.53485e+07	1.00937e+06	2.7442e+07	2.28523e+07	6.30292e+07	4.08127e+07	7.83709e+06	4.28478e+07	4.51036e+07	4.96504e+07	4.8171e+07	4.77506e+07	3.01655e+07	3.17544e+07	2.85771e+07	2.79648e+07
TG(16:0_20:4_20:4)	TG	M+H	903.744	19.7204	C59 H99 O6	8.01005e+06	946659	1.06416e+07	1.00486e+07	2.47062e+07	1.57176e+07	6.16896e+06	2.37776e+07	1.36269e+07	2.82257e+07	2.255e+07	2.718e+07	1.78209e+07	2.17029e+07	9.42055e+06	9.40253e+06
TG(16:0e_18:2_22:6)	TG	M+NH4	906.791	19.7609	C59 H104 O5 N1	874250	1.55527e+06	582512	39582.2	3.86913e+06	3.66731e+06	1.26393e+06	3.65715e+06	8.11479e+06	7.01358e+06	7.83556e+06	8.20542e+06	3.75364e+06	4.60382e+06	2.34923e+06	2.43706e+06
TG(16:1_18:2_22:6)	TG	M+NH4	918.755	18.7003	C59 H100 O6 N1	663968	6431.16	1.56383e+06	1.61124e+06	5.66433e+06	3.36324e+06	572092	5.25673e+06	6.17094e+06	6.75573e+06	6.64821e+06	6.7838e+06	3.34845e+06	3.63217e+06	3.09377e+06	3.02855e+06
TG(16:0_20:4_20:5)	TG	M+H	901.728	19.308	C59 H97 O6	9.02004e+06	795373	1.10258e+07	9.56581e+06	8.83813e+06	7.55181e+06	1.4069e+06	6.04394e+06	8.37122e+06	8.34867e+06	8.40019e+06	8.15023e+06	6.17842e+06	6.80901e+06	6.19551e+06	6.10072e+06
TG(16:0_17:0_24:0)	TG	M+NH4	950.911	21.6429	C60 H120 O6 N1	4.55196e+06	579994	4.89893e+06	3.62979e+06	2.38396e+07	1.88735e+07	4.97774e+06	1.88431e+07	3.26783e+06	3.87484e+06	3.59399e+06	4.12866e+06	6.96336e+06	7.23084e+06	6.19942e+06	6.05799e+06
TG(18:0e_16:0_23:0)	TG	M+NH4	936.932	22.005	C60 H122 O5 N1	16957.2	3814.89	21536.3	21846.8	3.7684e+06	3.11938e+06	690002	1.61485e+06	416989	499475	530889	514146	753259	825787	652858	532470
TG(25:1_16:0_16:0)	TG	M+NH4	948.895	21.3508	C60 H118 O6 N1	2.14449e+07	606082	2.44432e+07	1.72793e+07	4.77078e+07	3.94512e+07	9.81507e+06	5.73321e+07	1.6971e+07	1.83947e+07	1.78863e+07	1.90781e+07	2.1138e+07	2.25816e+07	2.05821e+07	2.02593e+07
TG(18:0e_16:0_23:1)	TG	M+NH4	934.916	21.7292	C60 H120 O5 N1	50995.2	0	92475.1	56313.3	8.31602e+06	6.8479e+06	1.7237e+06	6.52111e+06	3.29008e+06	3.22157e+06	3.49825e+06	3.61028e+06	2.59922e+06	2.44829e+06	2.35518e+06	2.42079e+06
TG(16:0_18:1_23:1)	TG	M+NH4	946.88	21.0455	C60 H116 O6 N1	3.90524e+07	861435	4.51771e+07	3.34108e+07	4.38332e+07	3.65436e+07	9.12787e+06	6.78542e+07	3.2888e+07	3.66566e+07	3.65492e+07	3.43417e+07	3.11133e+07	3.39189e+07	2.97246e+07	2.90274e+07
TG(20:1e_16:0_21:1)	TG	M+NH4	932.9	21.4623	C60 H118 O5 N1	138996	0	220275	103767	4.12723e+06	4.33544e+06	949267	5.01205e+06	4.31781e+06	4.49837e+06	4.00727e+06	4.69701e+06	1.7264e+06	2.56698e+06	1.95779e+06	1.99648e+06
TG(19:1_18:1_20:1)	TG	M+NH4	944.864	20.7339	C60 H114 O6 N1	4.29534e+07	1.18475e+06	5.19986e+07	3.59361e+07	3.72958e+07	3.10186e+07	8.36211e+06	5.21225e+07	4.02607e+07	4.21065e+07	4.13898e+07	4.32875e+07	3.23246e+07	3.77104e+07	3.16393e+07	2.99736e+07
TG(20:1e_18:1_19:1)	TG	M+NH4	930.885	21.197	C60 H116 O5 N1	104426	10042.8	230969	384135	2.22675e+06	1.75605e+06	338814	2.4078e+06	3.66446e+06	3.91516e+06	3.69564e+06	4.10338e+06	1.52829e+06	1.75641e+06	1.4317e+06	1.42143e+06
TG(19:1_18:1_20:2)	TG	M+NH4	942.848	20.4877	C60 H112 O6 N1	1.34883e+07	451951	1.85469e+07	1.18314e+07	1.98007e+07	1.57662e+07	4.32276e+06	2.92776e+07	2.78021e+07	3.48775e+07	2.94996e+07	3.02981e+07	1.87133e+07	2.14118e+07	1.7697e+07	1.77194e+07
TG(19:1_18:1_20:3)	TG	M+NH4	940.833	20.1604	C60 H110 O6 N1	1.43945e+07	467028	1.69434e+07	1.23722e+07	1.13755e+07	1.11756e+07	2.72022e+06	1.74944e+07	2.68555e+07	3.67452e+07	2.37216e+07	3.37359e+07	1.50184e+07	1.62524e+07	1.48757e+07	1.35639e+07
TG(19:1_18:1_20:4)	TG	M+H	921.791	20.399	C60 H105 O6	7.79874e+06	277238	9.74707e+06	8.06976e+06	7.11735e+06	5.93804e+06	1.88655e+06	8.20789e+06	7.51427e+06	7.70666e+06	7.5694e+06	7.16701e+06	6.05989e+06	7.12408e+06	6.00124e+06	5.97355e+06
TG(18:0e_17:1_22:5)	TG	M+NH4	924.838	20.4648	C60 H110 O5 N1	352414	37491.3	73744	325340	5.49322e+06	4.45779e+06	1.35463e+06	5.42702e+06	1.01102e+07	1.05802e+07	1.07887e+07	1.02522e+07	2.98751e+06	4890715	4.5261e+06	2.34017e+06
TG(19:1_16:0_22:6)	TG	M+NH4	936.801	19.6393	C60 H106 O6 N1	7.3212e+06	181943	1.23304e+07	1.18411e+07	2.00207e+07	1.4066e+07	4.14858e+06	1.98175e+07	2.50129e+07	2.54316e+07	2.49487e+07	2.45956e+07	7.08088e+06	1.88417e+07	1.31377e+07	9.98452e+06
TG(16:0e_19:1_22:6)	TG	M+NH4	922.822	20.3618	C60 H108 O5 N1	2.0235e+06	140193	2.40686e+06	2.14883e+06	2.35306e+06	2.91953e+06	701089	3.56999e+06	5.68322e+06	5.96014e+06	5.01648e+06	5.74746e+06	1.97038e+06	2.87007e+06	3.24506e+06	2.04994e+06
TG(18:1_17:1_22:6)	TG	M+NH4	934.786	19.3093	C60 H104 O6 N1	3.47016e+06	13513.4	4.58661e+06	3.15083e+06	1.16879e+07	7.83104e+06	1.4644e+06	1.02475e+07	9.31856e+06	9.98083e+06	1.17212e+07	1.16317e+07	5.78003e+06	7.18951e+06	5.83127e+06	5.9878e+06
TG(18:2_17:1_22:6)	TG	M+NH4	932.77	18.8965	C60 H102 O6 N1	49306.7	0	5489.17	196646	1.24869e+06	789776	102242	1.32481e+06	1.28976e+06	1.05828e+06	1.41442e+06	1.45938e+06	702883	732952	661131	624566
TG(26:0_16:0_16:0)	TG	M+NH4	964.927	21.7622	C61 H122 O6 N1	1.59125e+07	822825	1.68992e+07	1.1679e+07	1.91461e+08	1.44385e+08	4.17128e+07	1.0969e+08	1.68107e+07	1.97588e+07	1.83384e+07	1.96879e+07	4.34421e+07	4.43832e+07	3.83486e+07	3.66867e+07
TG(18:0e_16:0_24:0)	TG	M+NH4	950.947	22.1189	C61 H124 O5 N1	49935.6	2739.51	22926.4	27077.6	3.62312e+07	2.80368e+07	6.49062e+06	1.19183e+07	2.76344e+06	3.36529e+06	3.18825e+06	3.39347e+06	6.1226e+06	6.27947e+06	5.53553e+06	5.57807e+06
TG(16:0_18:1_24:0)	TG	M+NH4	962.911	21.4892	C61 H120 O6 N1	1.05529e+08	2.76778e+06	1.19596e+08	8.4275e+07	3.51098e+08	2.88097e+08	7.51029e+07	3.26546e+08	7.59547e+07	8.85579e+07	8.34019e+07	8.89503e+07	1.16877e+08	1.32226e+08	1.13072e+08	1.15626e+08
TG(16:0_20:4_22:6)	TG	M+NH4	944.77	18.7346	C61 H102 O6 N1	1.82834e+06	21868	2.49472e+06	1.9259e+06	4.23976e+06	2.68213e+06	500174	4.31194e+06	4.71962e+06	5.25567e+06	5.59295e+06	5.20061e+06	2.99684e+06	3.27734e+06	2.62011e+06	2.68837e+06
TG(16:0e_20:4_22:6)	TG	M+NH4	930.791	19.601	C61 H104 O5 N1	5.45499e+06	284390	6.28978e+06	787966	1.39169e+06	941890	165488	1.01788e+06	4.69052e+06	2.85868e+06	3.24224e+06	6.53038e+06	3.47723e+06	4.50949e+06	1.20274e+06	3.01619e+06
TG(18:4_18:1_22:6)	TG	M+H	925.728	19.0625	C61 H97 O6	4.32026e+06	202734	5.33691e+06	4.09646e+06	9.38352e+06	7.36831e+06	1.42215e+06	5.85623e+06	7.00533e+06	7.5981e+06	6.5178e+06	6.77671e+06	4.67948e+06	5.88164e+06	4.65003e+06	4.61976e+06
TG(18:0e_16:0_24:1)	TG	M+NH4	948.932	21.8526	C61 H122 O5 N1	201006	2074.3	230766	165199	4.49591e+07	3.61967e+07	8.90479e+06	2.64334e+07	1.14866e+07	1.3003e+07	1.29643e+07	1.3085e+07	1.16499e+07	1.19633e+07	1.06113e+07	1.06433e+07
TG(16:0_18:1_24:1)	TG	M+NH4	960.895	21.1855	C61 H118 O6 N1	2.42915e+08	6.92812e+06	3.07703e+08	1.99928e+08	2.56403e+08	2.16724e+08	5.57745e+07	3.28906e+08	1.36157e+08	1.5026e+08	1.43407e+08	1.43455e+08	1.59806e+08	1.74256e+08	1.56441e+08	1.53434e+08
TG(18:1e_16:0_24:1)	TG	M+NH4	946.916	21.587	C61 H120 O5 N1	290631	2027.13	367516	241139	2.69815e+07	2.2935e+07	5.18871e+06	2.11321e+07	1.60014e+07	1.80219e+07	1.77212e+07	1.88304e+07	1.09682e+07	1.13628e+07	9.97958e+06	9.91631e+06
TG(18:1_18:1_22:1)	TG	M+NH4	958.88	20.8864	C61 H116 O6 N1	2.22585e+08	6.83941e+06	2.64176e+08	1.89517e+08	1.255e+08	1.04674e+08	2.79239e+07	1.80344e+08	1.19756e+08	1.30461e+08	1.27733e+08	1.27977e+08	1.20828e+08	1.3511e+08	1.15304e+08	1.12657e+08
TG(16:0_18:3_24:0)	TG	M+H	941.853	21.527	C61 H113 O6	1.11457e+06	230020	1.27615e+06	1.02168e+06	9.56311e+06	8.22794e+06	2.31135e+06	6.19584e+06	1.48297e+06	1.47674e+06	1.40559e+06	1.3897e+06	2.57527e+06	2.94112e+06	2.727e+06	2.40243e+06
TG(20:1e_16:0_22:2)	TG	M+NH4	944.9	21.3424	C61 H118 O5 N1	15094.4	1705.68	9889.56	5108.47	1.28009e+07	1.03356e+07	2.46276e+06	8.65828e+06	1.44818e+07	1.54426e+07	1.51029e+07	1.57602e+07	7.14169e+06	7.69614e+06	6.9456e+06	7.09923e+06
TG(20:1_18:1_20:2)	TG	M+NH4	956.864	20.6619	C61 H114 O6 N1	5.37152e+07	2.36633e+06	6.40105e+07	4.92298e+07	6.25388e+07	4.34049e+07	1.2012e+07	9.53536e+07	1.01512e+08	1.06471e+08	1.05371e+08	1.06687e+08	6.52732e+07	7.22975e+07	6.58322e+07	5.26395e+07
TG(14:0_22:2_22:2)	TG	M+H	939.838	21.2099	C61 H111 O6	5.63155e+06	105525	6.06043e+06	4.92785e+06	1.57131e+07	1.47692e+07	3.63288e+06	1.63569e+07	5.98801e+06	6.56306e+06	5.83933e+06	6.17692e+06	7.22465e+06	8.07358e+06	6.76347e+06	7.19775e+06
TG(20:0e_16:0_22:4)	TG	M+NH4	942.885	21.153	C61 H116 O5 N1	27409.8	0	56688.4	14399.6	1.3165e+07	7.37628e+06	2.20376e+06	1.16221e+07	3.16004e+07	3.23458e+07	3.92135e+07	3.22274e+07	1.57603e+07	1.69034e+07	1.38585e+07	1.32134e+07
TG(18:0_20:1_20:4)	TG	M+NH4	954.848	20.3607	C61 H112 O6 N1	8.76322e+07	4.1963e+06	1.10385e+08	8.17145e+07	6.65165e+07	5.54852e+07	1.66276e+07	1.25453e+08	1.69937e+08	1.8861e+08	1.73876e+08	1.75418e+08	9.85717e+07	1.10021e+08	9.20402e+07	9.33378e+07
TG(18:0_18:1_22:4)	TG	M+H	937.822	20.9097	C61 H109 O6	1.87147e+07	546594	2.04207e+07	1.7117e+07	1.90884e+07	1.72806e+07	5.41849e+06	2.15506e+07	1.56099e+07	1.58778e+07	1.5795e+07	1.40993e+07	1.51173e+07	1.73501e+07	1.41369e+07	1.38136e+07
TG(20:1e_16:0_22:4)	TG	M+NH4	940.869	20.9024	C61 H114 O5 N1	179974	6365.37	200089	171736	3.31381e+07	2.63697e+07	7.30116e+06	3.76867e+07	9.62074e+07	1.02583e+08	1.00853e+08	1.023e+08	4.26972e+07	4.77744e+07	3.73881e+07	3.99938e+07
TG(18:0_18:0_22:6)	TG	M+NH4	952.833	20.0374	C61 H110 O6 N1	2.15147e+08	8.23497e+06	2.72346e+08	2.06429e+08	1.12066e+08	9.30597e+07	2.19327e+07	1.56261e+08	2.365e+08	2.56103e+08	2.3646e+08	2.68811e+08	1.80377e+08	1.76582e+08	1.51583e+08	1.62795e+08
TG(20:1e_16:0_22:5)	TG	M+NH4	938.854	20.7246	C61 H112 O5 N1	423938	43619.2	17498.4	524341	2.95032e+07	4.88018e+07	6.91835e+06	2.05781e+07	2.34829e+07	2.19551e+07	2.33726e+07	2.39076e+07	1.33829e+07	1.43736e+07	1.38842e+07	1.27854e+07
TG(18:1_18:1_22:5)	TG	M+NH4	950.817	19.7405	C61 H108 O6 N1	1.01412e+08	4.396e+06	1.27361e+08	9.09156e+07	1.12417e+08	8.72661e+07	2.34515e+07	1.41079e+08	1.72763e+08	1.88459e+08	1.75817e+08	1.64965e+08	1.06836e+08	1.23728e+08	9.90021e+07	1.08704e+08
TG(18:0_18:1_22:6)	TG	M+H	933.791	20.3615	C61 H105 O6	3.61799e+06	249353	4.34159e+06	3.46358e+06	6.11846e+06	4.15044e+06	2.54634e+06	7.02852e+06	6.81969e+06	7.31434e+06	6.83611e+06	6.72218e+06	5.02245e+06	4.31682e+06	3.4764e+06	4.96146e+06
TG(18:0e_18:1_22:6)	TG	M+NH4	936.838	20.3452	C61 H110 O5 N1	29997.9	0	14451.5	0	2.25048e+07	1.89147e+07	5.10489e+06	2.00984e+07	1.76277e+07	1.91953e+07	2.38596e+07	1.98991e+07	1.39471e+07	1.13785e+07	9.81348e+06	1.28686e+07
TG(18:1_18:1_22:6)	TG	M+NH4	948.801	19.5308	C61 H106 O6 N1	6.88608e+07	2.72961e+06	8.982e+07	6.83579e+07	1.33174e+08	1.01804e+08	2.50483e+07	1.13882e+08	9.84835e+07	1.44623e+08	1.36871e+08	9.92214e+07	7.17618e+07	8.05214e+07	6.20382e+07	5.94062e+07
TG(18:0e_18:2_22:6)	TG	M+NH4	934.822	20.0902	C61 H108 O5 N1	439032	358084	35629	553702	1.11675e+07	6.70449e+06	2.81319e+06	9.94682e+06	1.21398e+07	1.51327e+07	1.34385e+07	1.90109e+07	8.74448e+06	1.06235e+07	6.942e+06	4.56326e+06
TG(22:5_18:2_18:2)	TG	M+NH4	946.786	18.722	C61 H104 O6 N1	344072	17947.8	511218	403188	887811	609929	104931	759232	1.16483e+06	1.35543e+06	1.57988e+06	1.59411e+06	218397	17625.3	631186	653528
TG(18:1_18:2_22:6)	TG	M+NH4	946.786	19.1291	C61 H104 O6 N1	8.40883e+06	525640	1.07221e+07	6.19093e+06	2.85974e+07	1.91738e+07	3.10849e+06	3.00312e+07	3.02741e+07	3.42157e+07	2.45663e+07	3.23732e+07	1.25862e+07	1.87577e+07	1.70396e+07	1.19447e+07
TG(18:1_20:4_20:4)	TG	M+H	929.759	19.7157	C61 H101 O6	2.22059e+07	1.47093e+06	2.89741e+07	2.51085e+07	1.50484e+07	1.38817e+07	1.62816e+06	1.42416e+07	2.42454e+07	2.59396e+07	2.0375e+07	1.62222e+07	1.85888e+07	2.24433e+07	1.67574e+07	1.65373e+07
TG(26:0_16:0_17:0)	TG	M+NH4	978.942	21.8722	C62 H124 O6 N1	2.36337e+06	205226	2.6347e+06	1.92975e+06	1.59175e+07	1.22545e+07	3.24176e+06	1.36987e+07	1.71559e+06	2.25382e+06	1.95489e+06	1.95722e+06	4.19801e+06	4.21832e+06	3.84096e+06	3.68874e+06
TG(25:0_16:0_18:1)	TG	M+NH4	976.927	21.6022	C62 H122 O6 N1	1.81542e+07	494889	2.06016e+07	1.47723e+07	5.00602e+07	4.03957e+07	1.01602e+07	5.73929e+07	1.19559e+07	1.35845e+07	1.29965e+07	1.39461e+07	1.9232e+07	2.00424e+07	1.82916e+07	1.75754e+07
TG(59:1e)	TG	M+NH4	962.947	21.9565	C62 H124 O5 N1	66010.3	501.654	61533.4	57473.8	5.64993e+06	4.18037e+06	562800	3.03903e+06	1.25034e+06	1.49333e+06	1.66713e+06	1.71275e+06	1.4104e+06	981941	1.04781e+06	1.42289e+06
TG(17:0_18:1_24:1)	TG	M+NH4	974.911	21.3143	C62 H120 O6 N1	4.18573e+07	985019	4.91001e+07	3.44072e+07	4.77027e+07	3.89079e+07	9.37747e+06	7.30238e+07	2.52761e+07	2.73904e+07	2.72527e+07	2.81517e+07	3.0463e+07	3.22298e+07	2.8898e+07	2.83525e+07
TG(20:1e_16:0_23:1)	TG	M+NH4	960.932	21.703	C62 H122 O5 N1	80202.8	0	182513	38204.7	2.00795e+06	2.74913e+06	735005	2.78903e+06	1.93621e+06	2.48454e+06	2.5631e+06	2.52728e+06	1.30016e+06	1.60677e+06	1.23623e+06	1.01433e+06
TG(18:1_17:1_24:1)	TG	M+NH4	972.895	21.0256	C62 H118 O6 N1	2.83085e+07	738425	3.51019e+07	2.56548e+07	2.05638e+07	1.71054e+07	4.40424e+06	3.74724e+07	2.04916e+07	2.09897e+07	2.09485e+07	2.04529e+07	1.97118e+07	2.06051e+07	1.81531e+07	1.73651e+07
TG(19:1_18:1_22:2)	TG	M+NH4	970.88	20.7588	C62 H116 O6 N1	1.00467e+07	196379	1.18095e+07	8.18245e+06	7.88318e+06	6.28015e+06	1.6464e+06	1.63398e+07	1.43467e+07	1.44011e+07	1.51241e+07	1.55126e+07	9.12931e+06	1.056e+07	8.97503e+06	8.76186e+06
TG(19:1_18:1_22:3)	TG	M+NH4	968.864	20.5083	C62 H114 O6 N1	9.60581e+06	248516	1.0653e+07	8.22003e+06	4.31436e+06	4.14389e+06	1.63331e+06	1.343e+07	1.58872e+07	1.86034e+07	1.78389e+07	1.59531e+07	9.83687e+06	9.10355e+06	8.05189e+06	8.03311e+06
TG(19:1_18:1_22:4)	TG	M+NH4	966.848	20.1868	C62 H112 O6 N1	1.79967e+07	463477	2.29828e+07	1.67464e+07	5.06159e+06	2.83633e+06	1.93865e+06	2.80232e+07	2.33183e+07	2.27135e+07	3.75945e+07	2.0722e+07	1.38355e+07	1.69877e+07	2.00044e+07	1.96203e+07
TG(19:1_18:1_22:5)	TG	M+NH4	964.833	19.8517	C62 H110 O6 N1	8.60721e+06	223042	1.17446e+07	8.58601e+06	6.91404e+06	6.53456e+06	1.21012e+06	1.27214e+07	1.71173e+07	1.90864e+07	1.51291e+07	2.45621e+07	1.08268e+07	1.15007e+07	9.6101e+06	6.24874e+06
TG(19:1_18:1_22:6)	TG	M+NH4	962.817	19.6165	C62 H108 O6 N1	4.00147e+06	23325.1	5.04986e+06	4.02679e+06	9.83529e+06	7.55575e+06	1.75113e+06	1.10579e+07	1.29828e+07	1.40502e+07	1.04531e+07	1.35069e+07	7.47719e+06	8.34812e+06	6.69236e+06	6.627e+06
TG(19:1_18:2_22:6)	TG	M+NH4	960.801	19.3325	C62 H106 O6 N1	627936	2582.81	529946	778654	1.09025e+06	1.35426e+06	143318	2.96497e+06	3.28899e+06	1.04646e+06	3.82541e+06	2.97957e+06	524502	655438	837485	673703
TG(26:0_16:0_18:0)	TG	M+NH4	992.958	21.9855	C63 H126 O6 N1	5.27044e+06	289631	6.1746e+06	4.37211e+06	9.02274e+07	6.84534e+07	1.68516e+07	5.98944e+07	6.43696e+06	8.10936e+06	6.84483e+06	7.23535e+06	1.9934e+07	1.9351e+07	1.86328e+07	1.76195e+07
TG(20:0e_16:0_24:0)	TG	M+NH4	978.979	22.3267	C63 H128 O5 N1	0	0	881.662	0	1.4964e+07	1.17923e+07	2.66837e+06	5.40801e+06	1.15768e+06	1.3657e+06	1.29686e+06	1.34624e+06	2.5519e+06	2.54576e+06	2.38252e+06	2.3831e+06
TG(26:0_16:0_18:1)	TG	M+NH4	990.942	21.7306	C63 H124 O6 N1	5.92485e+07	1.42782e+06	6.5932e+07	4.58771e+07	2.60712e+08	2.20765e+08	5.58031e+07	2.5079e+08	4.56041e+07	5.21738e+07	5.16559e+07	5.3542e+07	8.48389e+07	8.73783e+07	7.91763e+07	7.65975e+07
TG(18:1_20:3_22:6)	TG	M+NH4	972.801	19.0058	C63 H106 O6 N1	1.7211e+06	65228.7	1.36574e+06	1.82903e+06	3.45508e+06	1.52358e+06	334644	2.63712e+06	2.99803e+06	2.81779e+06	5.74292e+06	5.62647e+06	2.46127e+06	1.8821e+06	1.51571e+06	2.12776e+06
TG(18:0_20:4_22:6)	TG	M+NH4	972.801	19.3159	C63 H106 O6 N1	5.21071e+06	147174	6.96052e+06	5.47951e+06	6.58592e+06	4.81957e+06	1.08677e+06	9.55121e+06	9.29855e+06	1.15697e+07	1.18938e+07	1.09258e+07	6.37528e+06	5.5829e+06	5.16827e+06	4.94266e+06
TG(16:0_22:4_22:6)	TG	M+H	955.775	19.7056	C63 H103 O6	1.26711e+07	547042	1.43576e+07	1.4219e+07	1.31133e+06	1.02729e+07	2.48603e+06	1.21796e+07	7.84734e+06	6.84023e+06	1.0984e+07	6.96812e+06	6.28232e+06	5.51771e+06	5.41241e+06	4.32925e+06
TG(16:0e_22:4_22:6)	TG	M+NH4	958.822	19.9271	C63 H108 O5 N1	314114	31085.7	18276.1	295867	132500	26045.5	86.1624	56237.4	98574.5	74119.1	9461.51	323782	52576.3	111189	169240	175743
TG(18:1_20:4_22:6)	TG	M+H	953.759	19.5302	C63 H101 O6	6.87007e+06	228047	8.8158e+06	8.09299e+06	1.05311e+07	9.22576e+06	2.41187e+06	1.01075e+07	1.24827e+07	8.16358e+06	7.17213e+06	7.5805e+06	6.79873e+06	1.04138e+07	7.95411e+06	5.48521e+06
TG(16:0e_22:5_22:6)	TG	M+NH4	956.807	19.6	C63 H106 O5 N1	4.43884e+06	354734	6.01048e+06	4.84275e+06	5.49278e+06	4.75375e+06	1.41019e+06	1.55655e+06	7.33272e+06	5.82265e+06	7.44886e+06	7.98097e+06	4.8143e+06	4.91283e+06	4.41513e+06	2.61669e+06
TG(16:0_22:6_22:6)	TG	M+H	951.744	19.1283	C63 H99 O6	1.03457e+06	50867.1	1.38609e+06	885056	4.78184e+06	2.67255e+06	575150	3.08237e+06	4.57859e+06	4.12258e+06	4.44056e+06	3.85035e+06	2.14505e+06	2.95858e+06	2.23329e+06	2.24694e+06
TG(16:0e_22:6_22:6)	TG	M+NH4	954.791	19.3976	C63 H104 O5 N1	79628.3	2707.37	40361.5	497537	2.22729e+06	1.92546e+06	434793	1.28303e+06	3.5811e+06	3.6205e+06	3.24002e+06	3.71883e+06	1.42522e+06	1.69421e+06	1.40072e+06	1.28728e+06
TG(20:0e_16:0_24:1)	TG	M+NH4	976.963	22.0676	C63 H126 O5 N1	39223.1	0	26629.9	4192.53	2.30352e+07	1.7902e+07	4.11993e+06	1.16597e+07	4.57199e+06	5.22088e+06	5.24668e+06	5.26826e+06	5.51877e+06	5.43522e+06	5.00579e+06	4.96847e+06
TG(18:1_18:1_24:0)	TG	M+NH4	988.927	21.4462	C63 H122 O6 N1	2.27496e+08	5.57912e+06	2.46816e+08	1.77995e+08	2.7664e+08	2.22382e+08	5.79413e+07	3.12249e+08	1.03791e+08	1.13027e+08	1.09585e+08	1.23905e+08	1.48921e+08	1.53445e+08	1.32275e+08	1.28157e+08
TG(20:1e_16:0_24:1)	TG	M+NH4	974.947	21.8183	C63 H124 O5 N1	102548	1289.84	108396	52436.2	1.35737e+07	1.10269e+07	2.70665e+06	1.03558e+07	6.34412e+06	7.01968e+06	7.16984e+06	7.3245e+06	4.75269e+06	4.80648e+06	4.515e+06	4.11892e+06
TG(18:1_18:1_24:1)	TG	M+NH4	986.911	21.1604	C63 H120 O6 N1	2.43078e+08	6.50681e+06	2.80289e+08	2.04676e+08	1.28734e+08	1.06039e+08	2.75046e+07	2.04297e+08	9.5756e+07	1.04755e+08	1.0134e+08	9.95574e+07	1.22644e+08	1.33558e+08	1.18797e+08	1.15227e+08
TG(18:1e_18:1_24:1)	TG	M+NH4	972.932	21.5756	C63 H122 O5 N1	20068.3	895.626	43171.6	5.706	4.91878e+06	3.98687e+06	1.06567e+06	4.74616e+06	5.69911e+06	5.10274e+06	6.11052e+06	6.76004e+06	3.25969e+06	2.64119e+06	3.1566e+06	2.4531e+06
TG(18:1_18:1_24:2)	TG	M+NH4	984.895	20.8934	C63 H118 O6 N1	5.31837e+07	1.64294e+06	6.29162e+07	4.54238e+07	3.20716e+07	2.56299e+07	7.06028e+06	6.89872e+07	5.17854e+07	5.6324e+07	5.75199e+07	5.55954e+07	3.96285e+07	4.34698e+07	3.72807e+07	3.60955e+07
TG(20:3e_16:0_24:1)	TG	M+NH4	970.916	21.398	C63 H120 O5 N1	110073	0	85657.3	58940.3	3.19482e+06	2.40249e+06	786286	5.15555e+06	9.02822e+06	9.99437e+06	9.60559e+06	9.96834e+06	4.12687e+06	3.9994e+06	3.04832e+06	3.88563e+06
TG(16:0_20:4_24:1)	TG	M+NH4	982.88	20.6831	C63 H116 O6 N1	3.68543e+07	1.47055e+06	4.52226e+07	3.29706e+07	2.97035e+07	2.53142e+07	7.24981e+06	6.57017e+07	7.43613e+07	7.93341e+07	7.55212e+07	8.01337e+07	4.63631e+07	5.06206e+07	4.474e+07	4.27384e+07
TG(18:4_18:0_24:1)	TG	M+H	965.853	21.1934	C63 H113 O6	1.57688e+07	362531	1.55179e+07	1.35871e+07	1.36751e+07	1.28162e+07	2.97976e+06	1.93232e+07	8.11306e+06	8.70738e+06	7.60886e+06	7.98033e+06	1.04783e+07	1.17713e+07	1.01064e+07	9.97841e+06
TG(20:1e_20:0_20:4)	TG	M+NH4	968.9	21.153	C63 H118 O5 N1	211847	12615.4	190758	158482	9.72807e+06	7.60427e+06	1.75585e+06	1.17066e+07	2.49443e+07	2.72871e+07	2.68066e+07	2.60347e+07	1.01858e+07	1.15212e+07	1.04558e+07	1.00768e+07
TG(20:1_18:1_22:4)	TG	M+NH4	980.864	20.394	C63 H114 O6 N1	1.17111e+08	3.57263e+06	1.51515e+08	1.09938e+08	4.89262e+07	4.0536e+07	1.10925e+07	9.87272e+07	1.24606e+08	1.40858e+08	1.28461e+08	1.32846e+08	8.50454e+07	9.49825e+07	8.21976e+07	7.67751e+07
TG(16:0_22:0_22:6)	TG	M+NH4	980.864	20.8664	C63 H114 O6 N1	479217	9102.22	513924	415220	249129	196040	59833.9	478081	784825	876496	514653	249137	419455	220995	375471	386007
TG(20:1e_18:1_22:4)	TG	M+NH4	966.885	20.877	C63 H116 O5 N1	414344	18395.7	175585	152415	1.59949e+07	1.42351e+07	4.20774e+06	2.27999e+07	3.22196e+07	3.32332e+07	3.3816e+07	3.3465e+07	1.49018e+07	2.16585e+07	1.30904e+07	1.43871e+07
TG(18:0_20:1_22:6)	TG	M+NH4	978.848	20.03	C63 H112 O6 N1	1.48762e+08	4.29769e+06	1.8932e+08	1.41993e+08	7.21218e+07	5.66341e+07	1.58169e+07	1.07065e+08	1.4144e+08	1.52175e+08	1.40791e+08	1.43012e+08	1.03454e+08	1.11876e+08	9.70441e+07	9.18384e+07
TG(20:0_18:1_22:6)	TG	M+NH4	978.848	20.341	C63 H112 O6 N1	4.9532e+06	58663.3	6.42796e+06	5.3893e+06	5.19517e+06	4.25471e+06	1.12852e+06	5.6585e+06	3540193	4.39473e+06	3.66822e+06	3.03669e+06	4.12189e+06	3.72113e+06	3.48272e+06	3.55195e+06
TG(18:0e_20:1_22:6)	TG	M+NH4	964.869	20.6312	C63 H114 O5 N1	3.14822e+06	63745.1	3.04853e+06	2.74121e+06	1.5547e+07	8.98562e+06	3.53419e+06	1.07706e+07	2.04186e+07	2.14027e+07	4.1263e+07	2.38154e+07	1.47551e+07	1.6918e+07	1.10063e+07	7.47199e+06
TG(20:1_18:1_22:6)	TG	M+NH4	976.833	19.7636	C63 H110 O6 N1	1.22766e+07	107181	1.31277e+07	9.26017e+06	3.39673e+07	2.6501e+07	3.79876e+06	2.651e+07	3.45722e+07	3.76859e+07	3.58262e+07	3.38024e+07	1.76959e+07	3.53708e+07	2.92516e+07	1.48981e+07
TG(18:0e_20:2_22:6)	TG	M+NH4	962.854	20.3892	C63 H112 O5 N1	8172.59	108592	5827.1	431261	6.05688e+06	3.75028e+06	1.48148e+06	4.76707e+06	1.68913e+07	8.93556e+06	1.1024e+07	1.13836e+07	7.00475e+06	5.35057e+06	6.28995e+06	5.76514e+06
TG(18:0_20:3_22:6)	TG	M+NH4	974.817	19.5053	C63 H108 O6 N1	1.33673e+07	44355.3	1.57529e+07	1.27052e+07	2.16357e+07	1.65485e+07	3.14358e+06	2.55948e+07	4.16275e+07	4.24618e+07	4.14181e+07	4.39105e+07	2.24089e+07	2.48858e+07	1.93592e+07	1.92077e+07
TG(20:1e_20:4_20:4)	TG	M+NH4	960.838	20.1048	C63 H110 O5 N1	1.05076e+06	372428	1.44894e+06	1.16406e+06	2.18294e+06	1.75011e+06	616568	1.67212e+06	5.33787e+06	5.72575e+06	4.34556e+06	3.71337e+06	2.85278e+06	3.66234e+06	2.35796e+06	2.76725e+06
TG(26:0_17:0_18:0)	TG	M+NH4	1006.97	22.0803	C64 H128 O6 N1	661712	21467.9	732216	504504	4.60865e+06	3.42193e+06	992336	3.83842e+06	502969	401179	532525	559300	1.18544e+06	1.21192e+06	1.03608e+06	1.13278e+06
TG(26:1_17:0_18:0)	TG	M+NH4	1004.96	21.8352	C64 H126 O6 N1	6.73873e+06	165859	7.54797e+06	5.40329e+06	2.2682e+07	1.77457e+07	4.49847e+06	2.6047e+07	4.33944e+06	4.85388e+06	4.77042e+06	4.81562e+06	7.91427e+06	8.13542e+06	7.19975e+06	7.04517e+06
TG(26:1_17:0_18:1)	TG	M+NH4	1002.94	21.5694	C64 H124 O6 N1	2.64704e+07	603516	3.01574e+07	2.15363e+07	3.33414e+07	2.82912e+07	6.96214e+06	5.09584e+07	1.35691e+07	1.51917e+07	1.47951e+07	1.55385e+07	1.86405e+07	1.99214e+07	1.79445e+07	1.76167e+07
TG(25:1_18:1_18:1)	TG	M+NH4	1000.93	21.2887	C64 H122 O6 N1	2.94119e+07	703677	3.45372e+07	2.45994e+07	1.99671e+07	1.64645e+07	4.0427e+06	3.71152e+07	1.5329e+07	1.56973e+07	1.59419e+07	1.6401e+07	1.75029e+07	1.84513e+07	1.61194e+07	1.66044e+07
TG(25:1_18:1_18:2)	TG	M+NH4	998.911	21.032	C64 H120 O6 N1	6.48869e+06	129829	8.85714e+06	6.19917e+06	5.95888e+06	4.94367e+06	1.21802e+06	1.51054e+07	8.60978e+06	9.00147e+06	9.20481e+06	8.9768e+06	6.80041e+06	6.83197e+06	6.54317e+06	6.1654e+06
TG(18:4_19:0_24:0)	TG	M+H	981.884	21.615	C64 H117 O6	789296	3952.61	898098	784851	2.41013e+06	2.22509e+06	443412	3.33698e+06	613747	600934	650680	727631	1.03225e+06	1.07389e+06	962707	871831
TG(25:1_18:1_18:3)	TG	M+NH4	996.895	20.7877	C64 H118 O6 N1	7.45954e+06	272220	6.88926e+06	4.8626e+06	3.19745e+06	2.32573e+06	859783	6.61446e+06	7.93839e+06	7.66618e+06	7.58778e+06	7.4368e+06	5.53743e+06	5.39764e+06	5.06203e+06	4.17643e+06
TG(18:1_21:1_22:4)	TG	M+NH4	994.88	20.5195	C64 H116 O6 N1	8.67372e+06	220840	1.28503e+07	9.2069e+06	3.32065e+06	2.4893e+06	702886	7.64339e+06	1.04981e+07	1.13144e+07	1.08588e+07	1.18572e+07	6.85226e+06	8.40464e+06	7.10993e+06	6.60726e+06
TG(19:1_20:2_22:4)	TG	M+NH4	992.864	20.189	C64 H114 O6 N1	6.64763e+06	204884	1.00077e+07	7.45904e+06	2.94904e+06	3.8225e+06	1.21973e+06	8.74377e+06	1.09302e+07	7.47752e+06	7.9818e+06	1.10094e+07	6.49762e+06	5.13746e+06	5.24337e+06	5.08129e+06
TG(19:1_20:3_22:4)	TG	M+NH4	990.848	19.9748	C64 H112 O6 N1	234306	6293.34	3.32506e+06	2.60991e+06	4.12666e+06	1.61301e+06	673795	6.18868e+06	7.83113e+06	4.85436e+06	5.53223e+06	5.67716e+06	3.08019e+06	3.19465e+06	2.63964e+06	2.73392e+06
TG(28:0_16:0_18:0)	TG	M+NH4	1020.99	22.1867	C65 H130 O6 N1	1.46669e+06	65175.2	1.53823e+06	980994	1.77689e+07	1.30351e+07	3.31998e+06	1.19229e+07	1.01783e+06	1.17596e+06	1.14307e+06	1.30707e+06	3.6462e+06	3.82063e+06	3.49743e+06	3.27795e+06
TG(26:0_18:0_18:1)	TG	M+NH4	1018.97	21.9527	C65 H128 O6 N1	1.64397e+07	429973	1.85482e+07	1.2964e+07	8.81417e+07	7.09876e+07	1.73111e+07	8.17561e+07	1.1712e+07	1.32312e+07	1.26844e+07	1.35529e+07	2.401e+07	2.55799e+07	2.33627e+07	2.24977e+07
TG(18:1_22:4_22:5)	TG	M+NH4	1000.83	19.5301	C65 H110 O6 N1	9.26819e+06	256240	1.1329e+07	8.56803e+06	4.37658e+06	3.72066e+06	1.15624e+06	7.89076e+06	2.07813e+07	1.87846e+07	1.75886e+07	1.85185e+07	5.81318e+06	1.223e+07	1.00987e+07	1.44614e+07
TG(18:1e_22:4_22:5)	TG	M+NH4	986.854	20.1756	C65 H112 O5 N1	433935	3814.33	662076	261713	1.85354e+06	2.07191e+06	85856.4	2.87821e+06	5.96374e+06	7.28851e+06	6.72421e+06	5.91783e+06	3.01671e+06	1.98786e+06	4.60397e+06	4.05575e+06
TG(18:0_22:5_22:6)	TG	M+NH4	998.817	19.1098	C65 H108 O6 N1	1.5056e+06	20634.2	1.58613e+06	964326	427853	512783	35438.5	1.03967e+06	1.66279e+06	1.9753e+06	1.87945e+06	1.97529e+06	1.25958e+06	1.00549e+06	1.24078e+06	1.28842e+06
TG(18:0e_22:5_22:6)	TG	M+NH4	984.838	19.9094	C65 H110 O5 N1	4.31685e+06	0.362	5.29033e+06	4.76347e+06	3.49675e+06	4.17879e+06	504728	1.11697e+06	4.66395e+06	6.80116e+06	4.92641e+06	7.76474e+06	2.46777e+06	7.24775e+06	5.66711e+06	6.66304e+06
TG(18:1_22:5_22:6)	TG	M+NH4	996.801	18.9284	C65 H106 O6 N1	2.56128e+06	11896.7	3.10181e+06	2.25509e+06	420924	256969	63530.8	772328	1.51456e+06	1.9201e+06	1.89302e+06	1.40231e+06	1.02526e+06	1.00065e+06	928631	726453
TG(18:0_22:6_22:6)	TG	M+NH4	996.801	19.257	C65 H106 O6 N1	323913	2700.22	429503	324201	1.06149e+06	685401	145053	1.09959e+06	634686	704763	676201	682829	511398	569025	460183	468639
TG(18:0e_22:6_22:6)	TG	M+NH4	982.822	19.6662	C65 H108 O5 N1	311745	6838.69	107690	246332	4.18202e+06	2.93101e+06	658380	2.95798e+06	5.95956e+06	4.77894e+06	4.73355e+06	4.54902e+06	2.46363e+06	2.80344e+06	2.26e+06	1.83372e+06
TG(18:1_22:6_22:6)	TG	M+NH4	994.786	18.7351	C65 H104 O6 N1	1.33871e+06	9670.05	1.82569e+06	1.54965e+06	4.04226e+06	2.73054e+06	451741	2.64925e+06	3.68113e+06	3.58489e+06	3.68494e+06	3.67425e+06	2.20621e+06	2.20112e+06	1.90983e+06	1.99839e+06
TG(18:2_22:6_22:6)	TG	M+H	975.744	18.958	C65 H99 O6	867428	87672.4	1.12966e+06	1.20144e+06	1.57054e+06	1.07201e+06	236622	1.30537e+06	1.54054e+06	1.60727e+06	2.0202e+06	1.37054e+06	913016	1.45072e+06	895536	905935
TG(18:3_22:6_22:6)	TG	M+H	973.728	18.741	C65 H97 O6	74440	0	69078.3	127266	459532	394449	66121.3	489035	797721	776142	664071	650013	331009	374303	301157	291944
TG(26:0_18:1_18:1)	TG	M+NH4	1016.96	21.6936	C65 H126 O6 N1	8.48662e+07	2.04454e+06	9.58262e+07	6.82929e+07	1.39128e+08	1.08544e+08	2.82811e+07	1.68404e+08	3.94437e+07	4.4488e+07	4.46007e+07	4.60151e+07	6.57635e+07	6.61919e+07	5.9542e+07	5.67548e+07
TG(26:1_18:1_18:1)	TG	M+NH4	1014.94	21.4155	C65 H124 O6 N1	1.45451e+08	3.77543e+06	1.76507e+08	1.24858e+08	8.87056e+07	7.33491e+07	1.78699e+07	1.25875e+08	5.11065e+07	5.66066e+07	5.51751e+07	5.64651e+07	7.0233e+07	8.07972e+07	7.27238e+07	7.20341e+07
TG(26:1_18:1_18:2)	TG	M+NH4	1012.93	21.1594	C65 H122 O6 N1	4.07408e+07	909163	4.66494e+07	3.36623e+07	2.82114e+07	2.34373e+07	5.79081e+06	5.84102e+07	3.00615e+07	3.41644e+07	3.22902e+07	3.155e+07	2.6388e+07	2.99603e+07	2.60876e+07	2.58051e+07
TG(26:0_16:0_20:4)	TG	M+NH4	1012.93	21.4214	C65 H122 O6 N1	1.3587e+06	3948.84	1.40139e+06	856143	3.629e+06	2.76796e+06	747986	3.35965e+06	1.37995e+06	1.27226e+06	1.54982e+06	1.50601e+06	1.47965e+06	1.50819e+06	1.41641e+06	1.11867e+06
TG(18:1_20:4_24:0)	TG	M+NH4	1010.91	20.9331	C65 H120 O6 N1	1.4139e+07	1.03849e+06	4.82633e+07	1.31564e+07	2.08792e+07	1.68502e+07	4.6181e+06	2.55565e+07	2.79026e+07	2.17007e+07	2.09182e+07	2.08506e+07	1.48536e+07	1.3325e+07	1.2696e+07	1.27726e+07
TG(26:0_16:0_20:5)	TG	M+H	993.884	21.4573	C65 H117 O6	1.39315e+07	347896	1.36337e+07	1.20664e+07	1.47105e+07	1.36117e+07	3.30333e+06	1.8374e+07	6.13672e+06	6.83075e+06	6.42628e+06	6.78552e+06	9.42864e+06	1.02277e+07	8.94604e+06	8.608e+06
TG(18:1_20:4_24:1)	TG	M+NH4	1008.9	20.6953	C65 H118 O6 N1	6.18722e+07	1.68401e+06	7.25205e+07	5.30032e+07	1.69675e+07	2.29563e+07	3.63326e+06	4.29625e+07	4.07072e+07	4.27617e+07	4.16454e+07	4.1082e+07	3.2675e+07	3.661e+07	31309314	3.00342e+07
TG(16:0_22:6_24:0)	TG	M+NH4	1008.9	21.0268	C65 H118 O6 N1	1.62826e+06	4233.36	2.08976e+06	1.41253e+06	4.5251e+06	3.73915e+06	884572	5.15071e+06	1.08035e+06	1.129e+06	1.53261e+06	1.33858e+06	1.82541e+06	1.9999e+06	1.62358e+06	1.66535e+06
TG(18:1_22:1_22:5)	TG	M+NH4	1006.88	20.3726	C65 H116 O6 N1	6.43084e+07	2.01842e+06	8.07919e+07	5.87776e+07	2.22456e+07	1.90702e+07	5.23932e+06	4.47761e+07	4.24474e+07	4.56776e+07	4.38636e+07	4.08989e+07	3.71466e+07	3.76704e+07	3.48784e+07	3.19326e+07
TG(16:0_22:6_24:1)	TG	M+NH4	1006.88	20.6729	C65 H116 O6 N1	6.31791e+06	22228.3	7.4098e+06	5.31468e+06	4.36663e+06	4.01235e+06	784164	5.95004e+06	2.71878e+06	2.54216e+06	3.14486e+06	3.43089e+06	3.33447e+06	3.8324e+06	3.43504e+06	3.10924e+06
TG(18:0e_22:1_22:6)	TG	M+NH4	992.9	21.002	C65 H118 O5 N1	4.75317e+06	126432	4.5198e+06	4.08711e+06	7.94862e+06	6.89438e+06	1.72382e+06	7.71884e+06	8.86966e+06	1.05517e+07	9.61364e+06	1.17817e+07	5.10012e+06	5.61419e+06	5.0519e+06	3.82148e+06
TG(18:1_22:1_22:6)	TG	M+NH4	1004.86	20.097	C65 H114 O6 N1	1.28663e+07	306545	1.75395e+07	1.28445e+07	2.25304e+07	1.69689e+07	4.54008e+06	3.31677e+07	3.69231e+07	40808769	4.63499e+07	3.73003e+07	2.24232e+07	2.28858e+07	2.09959e+07	1.95856e+07
TG(18:1e_22:3_22:4)	TG	M+NH4	990.885	20.662	C65 H116 O5 N1	809552	13124.4	911148	710775	102304	74933.5	442378	3.32613e+06	5.01514e+06	1.12397e+07	6.09287e+06	7.69766e+06	4.26628e+06	3.8877e+06	2.0177e+06	3.1358e+06
TG(20:3_20:4_22:2)	TG	M+NH4	1002.85	19.8547	C65 H112 O6 N1	615403	12670.8	290310	791903	92576.1	161322	62114.1	683346	962900	1.1329e+06	2.4871e+06	1.37368e+06	1.442e+06	1.42365e+06	613618	469403
TG(18:0e_22:4_22:5)	TG	M+NH4	988.869	20.3639	C65 H114 O5 N1	413680	12969.5	567149	407536	472970	1.21917e+06	88435	2.69411e+06	9.92812e+06	1.2106e+07	6.90515e+06	9.47815e+06	4.31733e+06	5.06613e+06	3.07004e+06	2.96017e+06
TG(16:0_23:0_24:0)	TG	M+NH4	1035	22.28	C66 H132 O6 N1	216918	14458.8	229104	166576	1.08499e+06	979623	271919	1.04142e+06	122185	130500	111962	88140.4	329194	335013	280050	310566
TG(29:1_16:0_18:0)	TG	M+NH4	1032.99	22.0449	C66 H130 O6 N1	1.93661e+06	19271.9	2.18397e+06	1.51148e+06	6.6289e+06	4.97396e+06	1.28854e+06	7.25476e+06	1.00002e+06	950834	1.04842e+06	1.15463e+06	2.2889e+06	2.26527e+06	2.10693e+06	2.08503e+06
TG(27:1_18:0_18:1)	TG	M+NH4	1030.97	21.7997	C66 H128 O6 N1	8.20472e+06	133676	9.20138e+06	6.57335e+06	1.24602e+07	1.00389e+07	2.59244e+06	1.81701e+07	3.72099e+06	4.09702e+06	4.18511e+06	4.28853e+06	6.34764e+06	6.5516e+06	5.77966e+06	5.47126e+06
TG(26:1_18:1_19:1)	TG	M+NH4	1028.96	21.5336	C66 H126 O6 N1	1.35055e+07	291243	1.5174e+07	1.08051e+07	9.83931e+06	8.02735e+06	1.95866e+06	1.77513e+07	5.92574e+06	6.37303e+06	6.11488e+06	6.37769e+06	7.77307e+06	7.82811e+06	7.46321e+06	6.87483e+06
TG(27:1_18:1_18:2)	TG	M+NH4	1026.94	21.2928	C66 H124 O6 N1	3.54469e+06	29373.4	5.3617e+06	3.01651e+06	4.33486e+06	3.17595e+06	788993	7.95532e+06	4.24814e+06	4.48437e+06	4.30693e+06	4.82924e+06	3.81583e+06	3.6873e+06	4.89971e+06	2.97672e+06
TG(25:1_18:1_20:3)	TG	M+NH4	1024.93	21.0711	C66 H122 O6 N1	2.12116e+06	50039.1	5.15953e+06	2.07235e+06	1.94816e+06	978586	500846	4.29291e+06	3.15895e+06	3.88863e+06	2.89798e+06	2.99726e+06	3.18618e+06	2.25216e+06	1.94645e+06	2.10879e+06
TG(18:1_22:4_23:1)	TG	M+NH4	1022.91	20.832	C66 H120 O6 N1	6.32517e+06	27085.4	6.04512e+06	5.38199e+06	1.18159e+06	1.08268e+06	327008	4.92648e+06	4.05905e+06	4.20636e+06	4.05922e+06	3.86483e+06	2.57612e+06	3.67992e+06	3.37006e+06	3.18407e+06
TG(18:1_22:5_23:1)	TG	M+NH4	1020.9	20.5231	C66 H118 O6 N1	4.26856e+06	29534.5	6.31601e+06	3.94724e+06	1.25034e+06	1.29338e+06	347986	3.1913e+06	3.67867e+06	3.78117e+06	2.96613e+06	3.62408e+06	2.66971e+06	2.80749e+06	3.00437e+06	2.47726e+06
TG(16:0_24:0_24:0)	TG	M+NH4	1049.02	22.3844	C67 H134 O6 N1	780474	36765.3	793662	576786	5.70256e+06	4.34734e+06	1.18723e+06	4.13837e+06	307579	381331	304028	331476	1.31989e+06	1.35079e+06	1.18973e+06	1.16624e+06
TG(16:0_24:0_24:1)	TG	M+NH4	1047	22.1515	C67 H132 O6 N1	5.82486e+06	145356	6.45833e+06	4.63153e+06	2.24566e+07	1.7489e+07	4.21053e+06	2.10791e+07	2.32402e+06	2.68469e+06	2.46871e+06	2.72161e+06	6.47969e+06	6.54681e+06	6.03034e+06	5.89588e+06
TG(20:2_22:4_22:4)	TG	M+NH4	1028.86	19.8158	C67 H114 O6 N1	7.25401e+06	76800.5	1.03795e+07	8.25216e+06	1.24257e+06	2.34488e+06	201984	9.05685e+06	1.49235e+07	7.36483e+06	1.44537e+07	4.59616e+06	8.54586e+06	1.03192e+07	4.53842e+06	4.8351e+06
TG(20:1_22:5_22:5)	TG	M+NH4	1026.85	19.5771	C67 H112 O6 N1	9.44051e+06	55251.9	8.27979e+06	8.95473e+06	4.57413e+06	3.43724e+06	735625	9.0975e+06	1.46346e+07	1.56731e+07	1.44941e+07	1.52301e+07	8.43392e+06	9.35554e+06	7.68654e+06	7.58568e+06
TG(20:0e_22:5_22:6)	TG	M+NH4	1012.87	20.311	C67 H114 O5 N1	1.65251e+06	38840.9	2.13423e+06	1.77624e+06	231412	189740	124547	1.97087e+06	5.00174e+06	4.75473e+06	1.99871e+06	3.96437e+06	1.31193e+06	2.46768e+06	1.38398e+06	1.52829e+06
TG(22:4_20:4_22:4)	TG	M+NH4	1024.83	19.3197	C67 H110 O6 N1	6.11902e+06	110491	6.7303e+06	5.5134e+06	3.64884e+06	2.43677e+06	472192	5.62614e+06	8.80723e+06	7.86367e+06	7.9675e+06	8.11469e+06	5.28444e+06	5.69758e+06	5.04472e+06	4.66531e+06
TG(20:1_22:6_22:6)	TG	M+NH4	1022.82	18.9086	C67 H108 O6 N1	160827	0	205940	111794	210849	147685	6114.67	407180	835406	913525	991203	852442	357185	385604	312359	245880
TG(28:0_18:1_18:1)	TG	M+NH4	1044.99	21.912	C67 H130 O6 N1	2.53768e+07	591552	2.84426e+07	2.01463e+07	3.9411e+07	3.14951e+07	7.61306e+06	4.67727e+07	8.31935e+06	9.49052e+06	9.53563e+06	9.66557e+06	1.71718e+07	1.75616e+07	1.60293e+07	1.54985e+07
TG(26:1_18:1_20:1)	TG	M+NH4	1042.97	21.6515	C67 H128 O6 N1	4.71804e+07	1.08053e+06	5.17428e+07	3.72226e+07	3.18421e+07	2.61279e+07	6.18169e+06	4.63865e+07	1.31793e+07	1.47792e+07	1.48431e+07	1.53943e+07	2.35632e+07	2.41647e+07	2.15344e+07	2.11217e+07
TG(26:0_18:0_20:4)	TG	M+NH4	1040.96	21.4157	C67 H126 O6 N1	1.60867e+07	356332	1.78789e+07	1.31447e+07	1.13876e+07	1.07013e+07	2.02494e+06	2.12956e+07	9.48984e+06	1.06324e+07	1.06638e+07	1.07843e+07	1.03222e+07	1.09207e+07	9.23525e+06	9.30809e+06
TG(26:1_18:0_20:4)	TG	M+NH4	1038.94	21.2259	C67 H124 O6 N1	2.26562e+07	492498	6.84497e+06	1.84505e+07	1.57934e+07	1.2798e+07	2.98166e+06	2.89431e+07	1.41352e+07	7.38109e+06	1.54533e+07	1.43495e+07	1.37938e+07	1.49972e+07	1.34377e+07	1.36508e+07
TG(26:1_18:1_20:4)	TG	M+NH4	1036.93	21.0031	C67 H122 O6 N1	3.79905e+07	999653	4.42462e+07	3.25848e+07	1.36014e+07	1.10007e+07	2.63713e+06	2.61117e+07	1.47903e+07	1.83681e+07	1.80354e+07	1.54945e+07	1.83538e+07	2.00642e+07	1.70453e+07	1.5017e+07
TG(26:0_16:0_22:6)	TG	M+NH4	1036.93	21.33	C67 H122 O6 N1	998304	5827.94	1.0192e+06	867765	4.18244e+06	3.47304e+06	765197	4.21063e+06	884105	1.06275e+06	986558	934796	1.26647e+06	1.63576e+06	1.26078e+06	1.19208e+06
TG(18:1_22:5_24:1)	TG	M+NH4	1034.91	20.7086	C67 H120 O6 N1	3.64546e+07	939578	4.26265e+07	3.11621e+07	1.54771e+07	1.10992e+07	3.3411e+06	2.57532e+07	1.65099e+07	1.82614e+07	1.70208e+07	1.74625e+07	1.67231e+07	1.90268e+07	1.62835e+07	1.59573e+07
TG(26:1_16:0_22:6)	TG	M+NH4	1034.91	20.9843	C67 H120 O6 N1	7.28552e+06	28478.8	8.27481e+06	5.94491e+06	6.634e+06	5.69267e+06	1.47711e+06	8.79077e+06	2.81283e+06	3.28664e+06	2.78771e+06	3.02894e+06	4.22703e+06	4.46933e+06	4.03522e+06	4.06179e+06
TG(18:1_22:6_24:1)	TG	M+NH4	1032.9	20.4086	C67 H118 O6 N1	9.62423e+06	196837	1.23113e+07	9.03579e+06	6.79689e+06	4.10882e+06	1.4087e+06	1.43505e+07	1.38994e+07	1.55523e+07	1.36067e+07	1.46583e+07	8.8685e+06	1.016e+07	8.66979e+06	8.28994e+06
TG(18:1_22:6_24:2)	TG	M+NH4	1030.88	20.1479	C67 H116 O6 N1	7.60254e+06	131142	6.6806e+06	4.70759e+06	2.95912e+06	2.91855e+06	606585	7.52612e+06	9.3586e+06	1.46535e+07	9.13273e+06	8.66063e+06	5.87669e+06	6.32639e+06	6.16363e+06	5.04767e+06
TG(20:1e_22:4_22:4)	TG	M+NH4	1016.9	20.639	C67 H118 O5 N1	278679	0	289408	264595	147270	117732	27445.5	373332	7.04352e+06	6.48774e+06	6.62128e+06	8.98828e+06	3.21149e+06	3.3048e+06	2.65748e+06	1.71939e+06
TG(25:1_16:0_24:0)	TG	M+NH4	1061.02	22.2385	C68 H134 O6 N1	1.02527e+06	1217.31	1.09526e+06	786933	2.59024e+06	1.8113e+06	452280	2.60349e+06	249674	303676	290630	288930	874175	877605	811799	760048
TG(25:1_16:0_24:1)	TG	M+NH4	1059	22.002	C68 H132 O6 N1	3.3242e+06	53019.4	3.72339e+06	2.58088e+06	4.64285e+06	3.7425e+06	877180	6.41308e+06	976152	1.13455e+06	1.13158e+06	1.07255e+06	2.24857e+06	2.20106e+06	2.03709e+06	1.97396e+06
TG(25:1_18:1_22:1)	TG	M+NH4	1056.99	21.7583	C68 H130 O6 N1	4.36634e+06	94140.4	4.6735e+06	3.44619e+06	3.1833e+06	3.01244e+06	725243	5.98042e+06	1.54595e+06	1.40945e+06	1.69599e+06	1.90251e+06	1.92281e+06	2.51822e+06	2.33417e+06	2.21019e+06
TG(25:1_18:1_22:2)	TG	M+NH4	1054.97	21.535	C68 H128 O6 N1	2.15856e+06	7281.56	2.3536e+06	2.43418e+06	2.21461e+06	1.82615e+06	414018	3.65268e+06	1.43948e+06	1.70378e+06	2.62822e+06	1.17896e+06	1.89497e+06	2.17633e+06	1.39756e+06	1.29552e+06
TG(25:1_18:1_22:3)	TG	M+NH4	1052.96	21.345	C68 H126 O6 N1	1.19689e+06	14257.5	3.15124e+06	2.25401e+06	567011	1.11962e+06	297159	3.11617e+06	1.35007e+06	1.59649e+06	1.37638e+06	1.00045e+06	1.40793e+06	1.67946e+06	1.59105e+06	1.09668e+06
TG(26:0_16:0_24:0)	TG	M+NH4	1077.05	22.5583	C69 H138 O6 N1	612181	17398.6	589693	445697	4.16913e+06	3.23878e+06	865596	2.66321e+06	157602	178192	144997	151127	901750	904479	848627	830600
TG(26:1_16:0_24:0)	TG	M+NH4	1075.04	22.3365	C69 H136 O6 N1	4.29453e+06	98498.4	4.63243e+06	3.37632e+06	1.22769e+07	9.63952e+06	2.32641e+06	1.13736e+07	904955	1.06779e+06	1.0148e+06	1.01072e+06	3.48245e+06	3.53664e+06	3.52692e+06	3.34961e+06
TG(22:2_22:4_22:4)	TG	M+NH4	1056.9	20.1395	C69 H118 O6 N1	6.21619e+06	136001	8.69981e+06	6.17937e+06	168963	201371	28565.1	2.68385e+06	6.14155e+06	6.31276e+06	5.53683e+06	5.06018e+06	3.63539e+06	4.26995e+06	3.67977e+06	3.16986e+06
TG(22:0_22:6_22:6)	TG	M+NH4	1052.86	19.6883	C69 H114 O6 N1	2.22408e+06	3778.21	3.02307e+06	2.14263e+06	1.72406e+06	825185	76384.1	2.00475e+06	4.50211e+06	4.36247e+06	4.71067e+06	5.05119e+06	1.53856e+06	3.30562e+06	1.07737e+06	2.37186e+06
TG(22:1_22:6_22:6)	TG	M+NH4	1050.85	19.359	C69 H112 O6 N1	164525	0	167783	47619.2	768368	549275	48382.9	1.60347e+06	2.01943e+06	2.05102e+06	2.12295e+06	2.09889e+06	943535	938510	767660	714571
TG(26:1_16:0_24:1)	TG	M+NH4	1073.02	22.1048	C69 H134 O6 N1	1.36387e+07	297834	1.49361e+07	1.04844e+07	1.49183e+07	1.16133e+07	2.76902e+06	1.84891e+07	2.50586e+06	2.83623e+06	2.79584e+06	2.90222e+06	7.22133e+06	7.33882e+06	6.76125e+06	6.55155e+06
TG(30:1_18:1_18:1)	TG	M+NH4	1071	21.8672	C69 H132 O6 N1	1.76699e+07	395617	1.97262e+07	1.39691e+07	1.06848e+07	8.59227e+06	2.08869e+06	1.65779e+07	3.63437e+06	4.13784e+06	4.04647e+06	4.13117e+06	8.00669e+06	8.13271e+06	7.35198e+06	7.23811e+06
TG(26:1_18:1_22:2)	TG	M+NH4	1068.99	21.6505	C69 H130 O6 N1	8.61606e+06	114648	9.82143e+06	6.92488e+06	5.93751e+06	5.02607e+06	1.34395e+06	1.32811e+07	4.00917e+06	4.57532e+06	4.30383e+06	5.80663e+06	5.35957e+06	5.02457e+06	5.15623e+06	4.67581e+06
TG(26:0_20:1_20:4)	TG	M+NH4	1066.97	21.4707	C69 H128 O6 N1	1.33975e+07	459392	1.49719e+07	1.09107e+07	3.66525e+06	7.32849e+06	1.72188e+06	1.68926e+07	5.60107e+06	6.77814e+06	6.78345e+06	7.01244e+06	7.76321e+06	8.02414e+06	7.18027e+06	7.08458e+06
TG(26:0_18:1_22:5)	TG	M+NH4	1064.96	21.2615	C69 H126 O6 N1	2.93074e+07	722884	3.44852e+07	2.42706e+07	1.23456e+07	9.98033e+06	2.50788e+06	2.06596e+07	1.12425e+07	1.29067e+07	1.20117e+07	1.33285e+07	1.1708e+07	1.23767e+07	1.1885e+07	1.17148e+07
TG(26:1_18:1_22:5)	TG	M+NH4	1062.94	20.9817	C69 H124 O6 N1	2.77181e+07	671946	3.1745e+07	2.3481e+07	1.28447e+07	1.07122e+07	2.83985e+06	2.06043e+07	1.11577e+07	1.15374e+07	1.25884e+07	1.1949e+07	1.43489e+07	1.57594e+07	1.343e+07	1.21949e+07
TG(26:0_18:1_22:6)	TG	M+NH4	1062.94	21.2624	C69 H124 O6 N1	2.23075e+06	5180.2	2.68488e+06	1.73838e+06	3.14087e+06	2.56964e+06	603223	3.05613e+06	989559	949148	1.07989e+06	1.03012e+06	1.61412e+06	1.57783e+06	1.63745e+06	1.34958e+06
TG(26:1_18:1_22:6)	TG	M+NH4	1060.93	20.7047	C69 H122 O6 N1	8.16309e+06	142911	9.70166e+06	6.46481e+06	4.62594e+06	3.42335e+06	1.32799e+06	1.22488e+07	8.12119e+06	8.9363e+06	6.40442e+06	6.95803e+06	6.02886e+06	7.40745e+06	5.87692e+06	5.60091e+06
TG(26:0_17:1_24:0)	TG	M+NH4	1089.05	22.4182	C70 H138 O6 N1	781654	3242.51	824339	588528	1.56828e+06	1.16372e+06	297103	1.6448e+06	102143	128089	101196	117878	499188	504392	480013	473920
TG(26:1_17:0_24:1)	TG	M+NH4	1087.04	22.1975	C70 H136 O6 N1	2.20043e+06	23562.1	2.3961e+06	1.6991e+06	2.0296e+06	1.6275e+06	369335	3.13893e+06	344582	397092	389352	350932	1.1066e+06	1.13153e+06	1.05346e+06	1.01087e+06
TG(25:1_18:1_24:1)	TG	M+NH4	1085.02	21.9671	C70 H134 O6 N1	2.38233e+06	39688.8	2.65102e+06	1.86442e+06	1.64302e+06	1.32662e+06	287614	2.85155e+06	360264	565747	550867	596272	1.14398e+06	1.12687e+06	1.07193e+06	1.0528e+06
TG(26:1_20:3_21:1)	TG	M+NH4	1080.99	21.563	C70 H130 O6 N1	1.34648e+06	1845.44	1.7442e+06	1.62179e+06	746753	710255	123264	1.45647e+06	605292	534875	465241	610116	944967	1.02211e+06	939231	939659
TG(25:1_20:1_22:5)	TG	M+NH4	1076.96	21.114	C70 H126 O6 N1	3.04628e+06	15769.5	2.93072e+06	2.14987e+06	1.33686e+06	1.14866e+06	211141	3.84703e+06	1.48643e+06	1.63518e+06	1.51487e+06	1.24923e+06	1.48757e+06	1.57711e+06	1.46953e+06	1.41932e+06
TG(26:0_18:0_24:0)	TG	M+NH4	1105.08	22.7341	C71 H142 O6 N1	335811	8419.84	271647	220142	1.66688e+06	1.35205e+06	377716	1.18307e+06	50570.4	31924.8	39724.9	39688.6	404080	405724	371987	364069
TG(26:0_18:1_24:0)	TG	M+NH4	1103.07	22.5187	C71 H140 O6 N1	2.42955e+06	59763.4	2.63002e+06	1.87497e+06	6.51554e+06	5.08939e+06	1.32716e+06	5.80248e+06	366988	444594	402754	434548	1.90634e+06	1.98327e+06	1.80103e+06	1.78336e+06
TG(26:1_18:1_24:0)	TG	M+NH4	1101.05	22.2945	C71 H138 O6 N1	8.59532e+06	184727	9.31542e+06	6.6363e+06	7.89589e+06	6.35315e+06	1.40079e+06	1.05785e+07	1.08699e+06	1.22798e+06	1.22044e+06	1.25758e+06	4.00542e+06	4.16528e+06	3.87841e+06	3.75937e+06
TG(26:1_18:1_24:1)	TG	M+NH4	1099.04	22.0667	C71 H136 O6 N1	1.18554e+07	263936	1.28517e+07	9.16698e+06	5.51837e+06	4.46803e+06	1.03323e+06	9.35167e+06	1.55474e+06	1.76222e+06	1.6512e+06	1.47983e+06	4.60262e+06	4.80639e+06	4.30144e+06	4.22171e+06
TG(26:1_18:1_24:2)	TG	M+NH4	1097.02	21.8523	C71 H134 O6 N1	4.87425e+06	59946.2	5.68054e+06	3.94727e+06	3.04407e+06	2.20546e+06	536653	6.1222e+06	780953	1.61147e+06	1.60912e+06	2.35633e+06	2.51215e+06	2.51181e+06	2.29994e+06	2.942e+06
TG(26:1_20:3_22:1)	TG	M+NH4	1095	21.6872	C71 H132 O6 N1	6.57653e+06	136664	7.26254e+06	5.40138e+06	3.83434e+06	2.93526e+06	308477	1.04413e+07	2.5114e+06	2.61583e+06	2.45971e+06	2.74598e+06	3.30402e+06	3.42501e+06	4.9603e+06	3.03648e+06
TG(26:0_20:4_22:2)	TG	M+NH4	1092.99	21.4605	C71 H130 O6 N1	1.62595e+07	333652	1.8122e+07	1.28416e+07	8.0819e+06	6.55059e+06	1.66441e+06	1.40473e+07	4.33152e+06	5.40322e+06	4.49519e+06	4.94287e+06	7.60793e+06	7.8775e+06	6.9764e+06	6.95038e+06
TG(28:1_18:1_22:5)	TG	M+NH4	1090.97	21.2374	C71 H128 O6 N1	1.85359e+07	446414	2.10629e+07	1.5098e+07	9.69419e+06	7.60743e+06	2.16099e+06	2.03174e+07	7.18894e+06	6.2793e+06	7.71053e+06	6.82986e+06	8.32883e+06	1.03377e+07	1.03141e+07	8.51288e+06
TG(28:1_18:1_22:6)	TG	M+NH4	1088.96	20.9558	C71 H126 O6 N1	5.8719e+06	25843.3	6.96868e+06	4.3835e+06	7.72227e+06	5.03201e+06	1.54142e+06	1.38922e+07	5.00067e+06	5.95977e+06	5.72322e+06	6.5762e+06	5.22994e+06	6.36893e+06	5.19657e+06	5.19334e+06
TG(26:1_19:0_24:1)	TG	M+NH4	1115.07	22.3795	C72 H140 O6 N1	1.13079e+06	3309.83	1.24436e+06	924674	957667	746684	170773	1.47255e+06	115223	127197	130787	141612	484828	545077	511851	491700
TG(26:1_19:1_24:1)	TG	M+NH4	1113.05	22.1544	C72 H138 O6 N1	1.44167e+06	10259.4	1.5914e+06	1.09035e+06	741004	573033	102584	1.4596e+06	178889	220686	205795	225147	600677	619826	558347	546072
TG(26:0_20:1_24:0)	TG	M+NH4	1131.1	22.6956	C73 H144 O6 N1	923299	3933.49	956720	703147	2.08839e+06	1.67664e+06	442413	1.82839e+06	110300	128935	119402	111542	634738	640801	588111	571099
TG(28:1_18:1_24:0)	TG	M+NH4	1129.08	22.4774	C73 H142 O6 N1	3.60706e+06	73730.8	3.89602e+06	2.78968e+06	3.02076e+06	2.35692e+06	577073	3.9518e+06	335081	377716	373923	375423	1.54644e+06	1.64781e+06	1.50976e+06	1.4913e+06
TG(26:1_20:1_24:1)	TG	M+NH4	1127.07	22.2504	C73 H140 O6 N1	6.13297e+06	118911	6.65706e+06	4.73357e+06	2.19626e+06	1.61585e+06	420594	3.9468e+06	562634	577749	605361	598091	2.13225e+06	2.18339e+06	2.02163e+06	2.00502e+06
TG(28:1_18:1_24:2)	TG	M+NH4	1125.05	22.0424	C73 H138 O6 N1	3.17878e+06	15882.9	2.46743e+06	1.80702e+06	1.45114e+06	928661	190411	2.57449e+06	633908	715301	718933	731242	1.0795e+06	1.09492e+06	985104	908637
TG(26:1_20:3_24:1)	TG	M+NH4	1123.04	21.8857	C73 H136 O6 N1	4.85159e+06	11807.3	5.34567e+06	3.8702e+06	1.90713e+06	1.52215e+06	363566	2.54077e+06	562286	1.1128e+06	1.06187e+06	1.15357e+06	1.15402e+06	2.05077e+06	1.81775e+06	1.79985e+06
TG(26:1_20:4_24:1)	TG	M+NH4	1121.02	21.687	C73 H134 O6 N1	6.02327e+06	121147	6.67582e+06	5.07129e+06	2.66917e+06	1.70197e+06	485460	4.05195e+06	1.06218e+06	1.46217e+06	1.41834e+06	1.50203e+06	2.34171e+06	2.43819e+06	2.11463e+06	2.28253e+06
TG(26:1_22:1_22:5)	TG	M+NH4	1119	21.462	C73 H132 O6 N1	7.80367e+06	131228	8.82226e+06	6.06159e+06	3.85948e+06	2.87617e+06	942925	5.96535e+06	2.14235e+06	2.82526e+06	2.45987e+06	2.80207e+06	3.44755e+06	3.59437e+06	3.31444e+06	3.6607e+06
TG(30:1_18:1_22:6)	TG	M+NH4	1116.99	21.2084	C73 H130 O6 N1	2.28088e+06	10622.3	2.25376e+06	1.73566e+06	3.2383e+06	3.61451e+06	792395	5.82989e+06	2.83516e+06	2.67823e+06	2.70455e+06	2.87754e+06	2.66626e+06	2842932	2.73996e+06	2.5409e+06
TG(30:1_18:1_24:0)	TG	M+NH4	1157.11	22.6491	C75 H146 O6 N1	953282	9689.22	1.07755e+06	769438	777302	601175	130739	957232	21180.1	67558.5	68001.9	57977.3	400598	424796	370415	378694
TG(28:1_20:1_24:1)	TG	M+NH4	1155.1	22.4372	C75 H144 O6 N1	1.67157e+06	16035	1.81741e+06	1.2576e+06	601915	486270	100466	1.05933e+06	108159	124096	111638	117876	534845	584063	516867	514801
TG(26:1_22:5_24:1)	TG	M+NH4	1147.04	21.688	C75 H136 O6 N1	2.79789e+06	18735.4	3.07809e+06	2.23042e+06	1.35409e+06	1.12067e+06	245522	2.48684e+06	666104	522928	699012	517723	1.30651e+06	1.30225e+06	1.15201e+06	1.13486e+06
WE(3:0_18:1)	WE	M+NH4	342.337	3.28757	H44 C21 O2 N1	2.10255e+07	203140	1.85916e+07	1.55646e+07	356610	460797	125300	937319	77348.3	219428	130526	57616.6	4.75732e+06	4.42919e+06	4.38005e+06	4.35868e+06
CL(68:2)	CL	M-H	1404	19.918	C77 H145 O17 P2	2.4e+06	167031	1.99807e+06	3.49135e+06	315970	282789	11222.3	2.29767e+06	569037	350774	735421	693891	794119	789560	994930	1.14036e+06
CL(75:6)	CL	M-H	1494.04	12.559	C84 H151 O17 P2	0	0	0	0.123	680983	733779	104301	1.03082e+06	479306	928503	620341	487145	352687	268184	227297	273641
Cer(d18:2_16:0)	Cer	M+HCOO	580.495	12.0335	C35 H66 O5 N1	8.32337e+06	158177	9.29535e+06	8.14233e+06	1.12467e+07	9.64012e+06	2.60207e+06	1.31008e+07	6.29015e+06	6.17206e+06	7.5637e+06	7.79698e+06	7.69845e+06	7.51535e+06	6.73907e+06	6.89312e+06
Cer(d18:0_18:0)	Cer	M+HCOO	612.557	15.2379	C37 H74 O5 N1	3.82535e+06	41132.3	3.82826e+06	3.03448e+06	4.11265e+07	3.62193e+07	5.959e+06	2.50802e+07	2.60814e+06	3.79914e+06	3.45442e+06	3.3431e+06	8.45939e+06	8.59561e+06	9.17918e+06	8.73102e+06
Cer(d38:2)	Cer	M+HCOO	636.557	14.8041	C39 H74 O5 N1	14758.8	0	54965.6	13550.1	12406.1	8447.74	11245.8	49990.4	13633.3	28941.3	43839.2	35244.2	13806.1	34527.5	13378.9	61592.4
Cer(d40:0)	Cer	M+HCOO	668.62	17.4073	C41 H82 O5 N1	2.20011e+06	20701.9	2.19941e+06	1.7304e+06	1.32009e+07	1.2001e+07	1.96189e+06	2.18853e+07	1.7063e+06	2.44786e+06	2.17064e+06	2.23317e+06	3.21122e+06	3.17897e+06	3.62687e+06	3.54836e+06
Cer(d41:2)	Cer	M+HCOO	678.604	16.4981	C42 H80 O5 N1	5.39756e+06	16536.4	5.43927e+06	4.20967e+06	2.15366e+06	1.81813e+06	272582	6.49632e+06	2.20073e+06	2.62463e+06	2.72481e+06	2.50389e+06	2.10142e+06	2.36599e+06	2.20657e+06	2.40369e+06
Cer(d42:0)	Cer	M+HCOO	696.651	18.1589	C43 H86 O5 N1	3.86819e+06	55510.9	4.02678e+06	3.02198e+06	3.80987e+07	3.25472e+07	6.62129e+06	3.83854e+07	2.13406e+06	2.83999e+06	2.57635e+06	2.80888e+06	6.76034e+06	6.60414e+06	7.57885e+06	8.098e+06
Cer(d42:1)	Cer	M+HCOO	694.635	17.3115	C43 H84 O5 N1	1.68371e+07	127774	1.61839e+07	1.30354e+07	3.28191e+07	3.09142e+07	4.82616e+06	4.43357e+07	3.18915e+06	4.29757e+06	4.02458e+06	4.03883e+06	9.54611e+06	9.52155e+06	1.07069e+07	1.15405e+07
Cer(d42:1+O)	Cer	M+HCOO	710.63	17.61	C43 H84 O6 N1	1.99445e+06	24404.2	2.22096e+06	1.84915e+06	280737	378267	149369	171334	122847	42499.1	153933	139671	588415	559290	596329	381719
Cer(d18:1_24:1)	Cer	M+HCOO	692.62	17.0033	C43 H82 O5 N1	9.59528e+07	718237	9.65051e+07	8.24199e+07	3.64972e+07	3.69446e+07	6.13844e+06	1.16518e+08	4.84832e+07	5.66813e+07	6.15375e+07	6.05143e+07	2.57732e+07	2.94222e+07	4.89429e+07	4.92469e+07
Cer(d42:3)	Cer	M+HCOO	690.604	16.2796	C43 H80 O5 N1	452785	1989.47	632146	497031	445235	499142	129845	1.11127e+06	719210	787858	842453	964352	394624	455840	499477	530400
Cer(d43:0)	Cer	M+HCOO	710.667	18.3779	C44 H88 O5 N1	110816	0	92751	91417.3	424619	393265	55494	596434	77573.4	6945.58	99436.7	101488	82294.6	73485.5	144224	154152
Cer(d43:1)	Cer	M+HCOO	708.651	18.1485	C44 H86 O5 N1	152452	0	174345	114227	904550	768552	143837	2.10274e+06	276300	324143	332595	349006	299588	288390	342681	353508
Cer(d44:0)	Cer	M+HCOO	724.682	18.7866	C45 H90 O5 N1	956915	25846.4	1.04603e+06	828212	1.46275e+07	1.21976e+07	2.53534e+06	5.80282e+06	281968	365518	351917	352617	2.02644e+06	2.31889e+06	2.21259e+06	2.29246e+06
Cer(d44:1)	Cer	M+HCOO	722.667	18.5775	C45 H88 O5 N1	1.87781e+06	30424.1	2.05466e+06	1.58846e+06	3.52354e+06	2.87855e+06	588408	5.53357e+06	1.33258e+06	1.76888e+06	1.63634e+06	1.72209e+06	1.39963e+06	1.37871e+06	1.58969e+06	1.7086e+06
Cer(m32:0+O)	Cer	M+HCOO	556.495	12.4232	C33 H66 O5 N1	701395	0	858277	800739	8.42008e+06	8.45145e+06	2.22822e+06	5.25115e+06	520515	575056	515216	553637	2.1836e+06	2.22141e+06	1.78723e+06	2.00658e+06
Cer(m34:0+O)	Cer	M+HCOO	584.526	14.128	C35 H70 O5 N1	1.8361e+06	1462.06	1.94255e+06	1.66799e+06	2.39137e+06	2.34436e+06	705205	2.61055e+06	1.20721e+06	1.47774e+06	1.47979e+06	1.50977e+06	1.59792e+06	1.04787e+06	1.33534e+06	1.59314e+06
Cer(m38:0+O)	Cer	M+HCOO	640.589	16.46	C39 H78 O5 N1	1.84204e+06	985.355	1.7819e+06	1.34749e+06	1.23638e+07	1.07121e+07	1.89222e+06	9.26316e+06	924152	1.28481e+06	1.27249e+06	1.17083e+06	2.3322e+06	2.67849e+06	2.6248e+06	2.55807e+06
Cer(m40:0+O)	Cer	M+HCOO	668.62	17.4255	C41 H82 O5 N1	2.20011e+06	20730.1	2.20028e+06	1.72979e+06	1.3203e+07	1.20103e+07	1.96165e+06	2.18831e+07	1.76495e+06	2.44733e+06	2.17084e+06	2.23336e+06	3.21273e+06	3.18062e+06	3.63519e+06	3.54695e+06
Cer(m41:0+O)	Cer	M+HCOO	682.635	17.8165	C42 H84 O5 N1	427717	0.013	449669	361950	1.24682e+06	979784	177429	2.5068e+06	184450	337412	281549	327991	414689	384095	455844	465363
Cer(m42:0+O)	Cer	M+HCOO	696.651	18.1737	C43 H86 O5 N1	3.86678e+06	55384.2	4.02434e+06	3.01903e+06	3.80283e+07	3.25352e+07	6.60766e+06	3.8479e+07	2.11218e+06	2.83742e+06	2.74697e+06	2.82251e+06	6.75526e+06	6.57546e+06	7.57642e+06	8.10206e+06
Cer(m43:0+O)	Cer	M+HCOO	710.667	18.497	C44 H88 O5 N1	207442	1008.87	209555	175413	1.38947e+06	1.21115e+06	317409	1.2757e+06	74966.7	100610	43045.8	180387	258295	365121	302634	429417
Cer(m44:0+O)	Cer	M+HCOO	724.682	18.8038	C45 H90 O5 N1	955863	17353.6	1.04602e+06	821765	1.44809e+07	1.21632e+07	2.61229e+06	5.69235e+06	281951	365512	351909	346050	2.02962e+06	2.31097e+06	2.21368e+06	2.29249e+06
Cer(t17:0_23:0)	Cer	M+HCOO	684.615	16.5711	C41 H82 O6 N1	1.23404e+06	981.926	1.0142e+06	1.06215e+06	522031	432751	55505.2	618174	162481	210799	197201	185889	350577	385453	10002.2	383153
Cer(t17:0_23:1)	Cer	M+HCOO	682.599	15.263	C41 H80 O6 N1	979882	0	886381	808434	0.574	0.013	15051.2	34199.9	70782.7	5168.42	7891.53	88929.1	187883	65916.9	149923	190369
Cer(t17:0_24:1)	Cer	M+HCOO	696.615	15.8986	C42 H82 O6 N1	1.0163e+06	0	582072	643204	10132.9	7758.15	42620.7	638615	355057	382090	395752	383488	40482.8	404765	429122	373701
Cer(t17:0_25:1)	Cer	M+HCOO	710.63	16.4576	C43 H84 O6 N1	1.12296e+07	125978	1.06155e+07	9.01876e+06	1.28413e+06	1.07225e+06	143859	2.42848e+06	515141	604884	438175	444600	2.14239e+06	2.32472e+06	2.4005e+06	2.31936e+06
Cer(t17:0_25:2)	Cer	M+HCOO	708.615	16.6308	C43 H82 O6 N1	1.97693e+06	5602.22	1.9373e+06	1.63052e+06	73848.9	50692.1	918.805	253987	20083.9	62656.1	47698.7	8414.45	382538	418899	322695	416126
Cer(t18:0_26:1)	Cer	M+HCOO	738.662	17.396	C45 H88 O6 N1	1.2916e+06	0.002	1.21524e+06	1.07681e+06	544872	490776	15832.7	574032	95640.3	125481	96090.2	96951.8	366609	369408	377201	398712
DGDG(34:2)	DGDG	M+HCOO	961.611	8.0975	C50 H89 O17	1.16898e+06	2.24841e+06	1.51987e+06	1.61669e+06	1.3118e+06	1.16075e+06	1.45972e+06	102200	1.81717e+06	2.29803e+06	2.12008e+06	1.43039e+06	1.76236e+06	1.74344e+06	1.09717e+06	1.01839e+06
GM3(d34:1)	GM3	M-H	1151.71	10.5886	C57 H103 O21 N2	0	225.705	0	4384.59	1.24492e+06	1.73924e+06	392560	642211	828197	990322	1.15565e+06	1.10733e+06	908651	932234	473567	525619
GM3(d42:2)	GM3	M-H	1261.82	14.42	C65 H117 O21 N2	10017.4	0	1642.89	3797.83	905585	1.4071e+06	344831	1.33624e+06	1.31239e+06	1.60479e+06	1.39273e+06	1.30731e+06	724436	874498	550209	582542
Hex1Cer(d32:1)	Hex1Cer	M+HCOO	716.532	10.8683	C39 H74 O10 N1	233634	0	217136	321860	1.07748e+06	1.09929e+06	222819	3.10514e+06	1.10787e+06	1.94178e+06	1.35002e+06	1.04143e+06	993186	922184	599985	649011
Hex1Cer(d34:0)	Hex1Cer	M+HCOO	746.579	12.9099	C41 H80 O10 N1	1.12831e+06	2465.18	1.02379e+06	1.30767e+06	6.79125e+06	7.3484e+06	1.92918e+06	1.22124e+07	4.36489e+06	6.22838e+06	5.15182e+06	4.50811e+06	4.12028e+06	4.48859e+06	3.07046e+06	3.28732e+06
Hex1Cer(d34:1)	Hex1Cer	M+HCOO	744.563	12.3783	C41 H78 O10 N1	1.41045e+07	718496	1.41567e+07	1.81684e+07	5.91308e+07	7.18335e+07	2.14292e+07	1.06899e+08	4.60971e+07	6.24043e+07	5.14403e+07	4.48165e+07	4.50414e+07	4.63515e+07	3.05773e+07	3.45781e+07
Hex1Cer(d34:2)	Hex1Cer	M+HCOO	742.547	11.0901	C41 H76 O10 N1	209560	0	20005	233758	82960.9	69218.5	277414	120946	1.31825e+06	1.53939e+06	41330.7	1.11408e+06	995381	56365.7	638716	732013
Hex1Cer(d14:1_20:4)	Hex1Cer	M+HCOO	736.501	11.0386	C41 H70 O10 N1	4.60326e+06	161506	3.3524e+06	7.97085e+06	2.37894e+06	3.26749e+06	829175	4.84555e+06	1.61965e+06	4.16674e+06	3.37459e+06	1.47674e+06	4.24023e+06	4.33928e+06	1.81724e+06	2.79524e+06
Hex1Cer(d35:1)	Hex1Cer	M+HCOO	758.579	13.1129	C42 H80 O10 N1	287497	0	220975	337293	966477	1.0523e+06	220308	1.83265e+06	952964	1.47184e+06	1.18296e+06	996221	840779	877800	642401	699858
Hex1Cer(d15:1_20:4)	Hex1Cer	M+HCOO	750.516	11.73	C42 H72 O10 N1	362011	13296.1	252679	283932	516462	485117	206849	1.21953e+06	1.03511e+06	157007	1.29184e+06	921424	1.17096e+06	973049	560846	379560
Hex1Cer(d36:1)	Hex1Cer	M+HCOO	772.594	13.8146	C43 H82 O10 N1	1.21377e+06	11327.6	1.1487e+06	1.45209e+06	7.7234e+06	9.64621e+06	2.97509e+06	1.82597e+07	7.40404e+06	1.00891e+07	8.05034e+06	7.09678e+06	6.32884e+06	6.45015e+06	4.58108e+06	4.88897e+06
Hex1Cer(d36:2)	Hex1Cer	M+HCOO	770.579	13.3992	C43 H80 O10 N1	693841	40234.4	361137	166540	342524	292207	5105.35	80330.7	167404	699993	102756	458702	311012	109334	237569	514073
Hex1Cer(d16:1_20:4)	Hex1Cer	M+HCOO	764.532	12.4175	C43 H74 O10 N1	1.08899e+08	3.86207e+06	9.78168e+07	1.50825e+08	2.84223e+07	3.50799e+07	8.74661e+06	6.58281e+07	4.95971e+07	7.02027e+07	5.44008e+07	3.47609e+07	6.71813e+07	7.13725e+07	4.45992e+07	5.12245e+07
Hex1Cer(d14:1_22:5)	Hex1Cer	M+HCOO	762.516	11.0154	C43 H72 O10 N1	2.56254e+06	19811.4	2.34723e+06	3.21814e+06	250465	23097.5	34341.1	485411	190858	391570	32987.4	12180.6	1.43298e+06	1.18668e+06	203388	777288
Hex1Cer(d16:1_20:5)	Hex1Cer	M+HCOO	762.516	11.2831	C43 H72 O10 N1	5.4301e+06	322720	1.93662e+06	6.73982e+06	3.03792e+06	1.83208e+06	330767	8.5143e+06	2.97664e+06	4.6336e+06	4.0558e+06	3.87274e+06	3.7917e+06	4.22508e+06	1.61066e+06	3.17119e+06
Hex1Cer(d17:1_20:4)	Hex1Cer	M+HCOO	778.547	13.0556	C44 H76 O10 N1	6.25907e+06	101971	4.63554e+06	3.22448e+06	1.79292e+06	1.40533e+06	470875	3.26637e+06	2.1174e+06	3.14093e+06	2.29718e+06	1.42716e+06	2.4039e+06	3.04883e+06	1.92299e+06	2.69032e+06
Hex1Cer(d15:0_22:6)	Hex1Cer	M+HCOO	776.532	12.5913	C44 H74 O10 N1	3.7626e+06	57345.1	2.79951e+06	4.60391e+06	2.10389e+06	223113	531403	6.35479e+06	2.22203e+06	2.98712e+06	2.60395e+06	2.31578e+06	3.31347e+06	2.74723e+06	1.97737e+06	1.52089e+06
Hex1Cer(d15:1_22:6)	Hex1Cer	M+HCOO	774.516	11.302	C44 H72 O10 N1	1.35353e+06	15146	465163	782288	960563	897397	112277	3.40961e+06	851798	1.36993e+06	1.26752e+06	1.24964e+06	628938	768612	673959	675177
Hex1Cer(d38:1)	Hex1Cer	M+HCOO	800.626	15.1324	C45 H86 O10 N1	1.42002e+06	1485.05	1.18175e+06	1.58937e+06	5.40693e+06	6.68795e+06	1.68391e+06	1.01977e+07	4.02815e+06	6.10657e+06	4.82495e+06	4.28922e+06	3.58111e+06	3.3105e+06	2.96005e+06	3.08099e+06
Hex1Cer(d16:0_22:4)	Hex1Cer	M+HCOO	794.579	14.648	C45 H80 O10 N1	4.19649e+06	127087	3.4652e+06	3.55569e+06	4.40542e+06	4.97175e+06	1.4198e+06	1.05869e+07	5.12691e+06	7.32184e+06	5.57713e+06	4.33766e+06	4.63628e+06	4.82057e+06	3.45664e+06	3.8217e+06
Hex1Cer(d16:0_22:5)	Hex1Cer	M+HCOO	792.563	13.706	C45 H78 O10 N1	5.14875e+07	2.70614e+06	4.27619e+07	6.98125e+07	6.93593e+06	7.92427e+06	2.61344e+06	1.60207e+07	8256110	1.17252e+07	9.69759e+06	7.70227e+06	2.24354e+07	2.29654e+07	1.56307e+07	1.64266e+07
Hex1Cer(d18:0_20:5)	Hex1Cer	M+HCOO	792.563	13.998	C45 H78 O10 N1	2.24045e+06	130555	2.3015e+06	3.6897e+06	2.11086e+06	2.51033e+06	790756	7.36683e+06	1.92542e+06	2.99326e+06	2.03129e+06	1.85959e+06	2.77039e+06	2.88322e+06	2.14689e+06	2.14852e+06
Hex1Cer(d16:1_22:5)	Hex1Cer	M+HCOO	790.547	12.4277	C45 H76 O10 N1	2.84613e+07	1.32144e+06	434365	3.85197e+07	2.73273e+06	4.07506e+06	1.22139e+06	5.61962e+06	4.15412e+06	6.20252e+06	4.58314e+06	3.54804e+06	1.38069e+07	1.38174e+07	8.41404e+06	9.6916e+06
Hex1Cer(d16:1_22:6)	Hex1Cer	M+HCOO	788.532	11.9937	C45 H74 O10 N1	5.63188e+07	1.70118e+06	5.07945e+07	5.35649e+07	2.01158e+07	1.82987e+07	6.24884e+06	4.71274e+07	1.7211e+07	2.70645e+07	2.15399e+07	1.92193e+07	3.04994e+07	2.98716e+07	2.46151e+07	2.50258e+07
Hex1Cer(d40:0)	Hex1Cer	M+HCOO	830.673	16.7032	C47 H92 O10 N1	387883	0	340974	429388	2.24161e+06	2.4702e+06	473657	4.23045e+06	1.61355e+06	2.4552e+06	2.04003e+06	1.81858e+06	1.03668e+06	1.37802e+06	1.05185e+06	1.1761e+06
Hex1Cer(d40:1)	Hex1Cer	M+HCOO	828.657	16.3374	C47 H90 O10 N1	2.46076e+07	605016	2.43704e+07	2.78337e+07	5.49333e+07	5.98025e+07	1.80515e+07	3.77147e+07	4.89838e+07	6.49745e+07	5.24286e+07	4.70246e+07	2.63518e+07	2.71618e+07	3.46645e+07	3.84624e+07
Hex1Cer(d40:1+O)	Hex1Cer	M+HCOO	844.652	16.0572	C47 H90 O11 N1	1.05568e+07	199111	9.16378e+06	1.18256e+07	2.86284e+06	3.66287e+06	975158	9.02314e+06	6.92104e+06	9.98259e+06	8.32684e+06	7.67861e+06	5.14575e+06	5.48479e+06	5.12789e+06	5.4369e+06
Hex1Cer(d40:2)	Hex1Cer	M+HCOO	826.641	15.0432	C47 H88 O10 N1	591187	1191.71	749039	154551	241885	509721	15544.6	1.22075e+06	1.16485e+06	1.61188e+06	1.45202e+06	1.30043e+06	503803	752004	278853	427248
Hex1Cer(d20:1_20:4)	Hex1Cer	M+HCOO	820.594	14.923	C47 H82 O10 N1	5.25755e+06	115027	2.54206e+06	3.50585e+06	2.18386e+06	2.39288e+06	605078	4.79148e+06	2.11451e+06	2.85619e+06	2.06776e+06	1.42352e+06	3.07939e+06	2.19194e+06	1.40686e+06	1.42881e+06
Hex1Cer(d18:1_22:6)	Hex1Cer	M+HCOO	816.563	13.2528	C47 H78 O10 N1	5.52836e+06	164678	3.68545e+06	6.05736e+06	1.4823e+06	2.18025e+06	700195	4.8679e+06	1.64214e+06	1.59005e+06	1.74924e+06	1.44093e+06	2.46807e+06	2.62352e+06	1.72768e+06	2.07457e+06
Hex1Cer(d41:1)	Hex1Cer	M+HCOO	842.673	16.8363	C48 H92 O10 N1	3.32172e+06	34974.4	2.88466e+06	3.40049e+06	3.7373e+06	4.41911e+06	977779	7.96741e+06	2.75596e+06	4.52044e+06	3.28242e+06	3.35717e+06	2.4211e+06	2.63685e+06	2.37703e+06	2.82721e+06
Hex1Cer(d41:1+O)	Hex1Cer	M+HCOO	858.668	16.6287	C48 H92 O11 N1	1.58728e+06	3097.2	1.21375e+06	1.42232e+06	45796.2	73936.2	16197.7	109347	51819.7	72720.5	86265.2	206996	247209	285976	309916	336858
Hex1Cer(d41:2)	Hex1Cer	M+HCOO	840.657	15.6312	C48 H90 O10 N1	1.39726e+06	2798.97	1.0676e+06	1.31455e+06	831888	897509	193684	2.73122e+06	1.91171e+06	2.85199e+06	2.13379e+06	2.03312e+06	1.10697e+06	1.13029e+06	1.13779e+06	1.16083e+06
Hex1Cer(d42:1)	Hex1Cer	M+HCOO	856.688	17.2816	C49 H94 O10 N1	3.06677e+07	541891	2.46769e+07	3.09219e+07	6.78623e+07	8.24698e+07	2.01486e+07	1.26676e+08	3.43482e+07	5.2392e+07	3.89125e+07	3.94572e+07	3.05386e+07	2.53242e+07	3.31489e+07	3.78334e+07
Hex1Cer(d42:1+O)	Hex1Cer	M+HCOO	872.683	17.0812	C49 H94 O11 N1	1.24814e+07	211175	1.08722e+07	1.3162e+07	130519	178550	30622.5	63119.1	259018	551839	349724	306583	2.42972e+06	2.31052e+06	2.58852e+06	3.10819e+06
Hex1Cer(d42:2)	Hex1Cer	M+HCOO	854.673	16.242	C49 H92 O10 N1	5.37092e+07	1.38849e+06	4.84593e+07	5.10963e+07	2.0707e+07	2.33237e+07	7.35758e+06	4.53449e+07	4.14756e+07	5.7087e+07	4.8991e+07	4.37651e+07	3.03876e+07	3.17824e+07	3.06651e+07	1.47174e+07
Hex1Cer(d43:1)	Hex1Cer	M+HCOO	870.704	17.5868	C50 H96 O10 N1	188110	0	135214	171602	575952	632402	181557	1.32704e+06	267450	383130	314470	283881	85053.3	310648	229128	370987
Hex1Cer(d43:1+O)	Hex1Cer	M+HCOO	886.699	16.2575	C50 H96 O11 N1	1.0963e+06	12974.6	925265	1.12899e+06	131115	165613	32363.1	173220	43522.4	41042.2	46663.5	37593.7	222036	108208	187889	201328
Hex1Cer(d43:2)	Hex1Cer	M+HCOO	868.688	16.7291	C50 H94 O10 N1	1.74111e+06	7374.17	1.43319e+06	1.81616e+06	776695	972572	157128	2.63181e+06	1.13519e+06	1.89678e+06	1.41025e+06	1.29193e+06	886485	962262	869316	1.035e+06
Hex1Cer(d44:0+O)	Hex1Cer	M+HCOO	902.73	17.6698	C51 H100 O11 N1	2.18754e+06	33753.5	1.79728e+06	2.18746e+06	7054.28	7223.78	1014.52	8528.16	13602.3	11092.8	11033.3	2416.99	348261	387702	461295	473995
Hex1Cer(d44:1+O)	Hex1Cer	M+HCOO	900.715	17.8939	C51 H98 O11 N1	1.69266e+06	4309.91	1.4587e+06	1.58494e+06	217175	216016	33138.4	258932	1724.42	48571.7	25559.7	19292.6	241525	282383	278762	379959
Hex1Cer(d44:2)	Hex1Cer	M+HCOO	882.704	17.1899	C51 H96 O10 N1	8.93209e+06	148346	7.9977e+06	8.89264e+06	1.62368e+06	1.8413e+06	478427	5.02906e+06	2.61143e+06	4.01766e+06	3.14119e+06	2.98005e+06	2.90204e+06	2.99723e+06	3.15683e+06	3.38044e+06
Hex1Cer(d44:3)	Hex1Cer	M+HCOO	880.688	16.2868	C51 H94 O10 N1	809218	1381.56	719616	677050	371569	441323	109409	690804	1.44988e+06	2.00659e+06	1.68688e+06	1.4035e+06	598071	665719	596843	843675
Hex1Cer(m34:0+O)	Hex1Cer	M+HCOO	746.579	12.9255	C41 H80 O10 N1	1.12831e+06	2697.27	1.02379e+06	1.30825e+06	6.79125e+06	7.3484e+06	1.92148e+06	1.2214e+07	4.3725e+06	6.24604e+06	5.17495e+06	4.49975e+06	4.15755e+06	4.49241e+06	3.07046e+06	3.28737e+06
Hex1Cer(m40:0+O)	Hex1Cer	M+HCOO	830.673	16.7266	C47 H92 O10 N1	404378	0	333137	429428	2.22945e+06	2.47016e+06	473661	4.23055e+06	1.61356e+06	2.45517e+06	2.04004e+06	1.82115e+06	1.0569e+06	1.41355e+06	1.03797e+06	1.17656e+06
Hex1Cer(m42:0+O)	Hex1Cer	M+HCOO	858.704	17.5831	C49 H96 O10 N1	797034	1105.99	709407	836356	4.41731e+06	4.59525e+06	1.07045e+06	7.06289e+06	1.52753e+06	2.0234e+06	1.77886e+06	1.82754e+06	1.6027e+06	1.58527e+06	1.72549e+06	1.85914e+06
Hex1Cer(t33:0)	Hex1Cer	M+CH3COO	762.574	12.8784	C41 H80 O11 N1	858695	1222.01	810747	894352	4.20277e+06	4.15054e+06	2.4965e+06	3.41663e+06	6.31406e+06	3.84641e+06	6.09956e+06	5.91243e+06	3.2183e+06	2.57083e+06	2.04247e+06	2.35421e+06
Hex1Cer(t34:0)	Hex1Cer	M+CH3COO	776.589	13.4427	C42 H82 O11 N1	4.53613e+06	340984	4.63097e+06	6.86441e+06	6.65855e+06	8.08943e+06	1.81208e+06	1.05657e+07	8.18538e+06	1.06817e+07	9.30683e+06	6.43155e+06	7.73987e+06	7.64915e+06	4.1787e+06	4.92523e+06
Hex1Cer(t36:0)	Hex1Cer	M+CH3COO	804.621	14.7982	C44 H86 O11 N1	2.21791e+06	20269.6	2.7938e+06	3.52157e+06	3.95301e+06	4.85027e+06	1.28666e+06	5.11628e+06	3.97476e+06	5.64919e+06	4.56308e+06	3.51159e+06	3.16237e+06	3.43483e+06	2.20355e+06	2.68154e+06
Hex1Cer(t16:0_20:4)	Hex1Cer	M-H	736.537	12.3974	C42 H74 O9 N1	1.9974e+06	49431	1.87463e+06	2.44197e+06	5.22505e+06	5.35258e+06	1.93134e+06	7.7692e+06	4.25671e+06	4.85645e+06	4.41474e+06	4.4138e+06	4.50072e+06	4.56777e+06	3.97488e+06	4.51869e+06
Hex1Cer(t18:0_20:4)	Hex1Cer	M+HCOO	810.574	12.6038	C45 H80 O11 N1	609549	1774.41	536920	702735	7.94854e+06	8.66131e+06	2.79663e+06	1.5272e+07	1.30332e+07	1.68683e+07	1.5331e+07	1.19507e+07	8.88547e+06	9.21687e+06	5.67634e+06	6.11169e+06
Hex1Cer(t39:0)	Hex1Cer	M+CH3COO	846.668	16.609	C47 H92 O11 N1	5.91577e+06	88264.4	5.69136e+06	6.54341e+06	3.66468e+06	5.19796e+06	836345	6.04413e+06	2.59327e+06	3.69526e+06	2.92498e+06	2.68464e+06	2.49371e+06	2.94392e+06	2.79488e+06	2.53895e+06
Hex1Cer(t39:4)	Hex1Cer	M+CH3COO	838.605	13.5728	C47 H84 O11 N1	1906.18	0	1287.15	673.64	2.01459e+06	2.35702e+06	688934	2.04085e+06	2.58258e+06	3.45267e+06	2.985e+06	2.35559e+06	1.41052e+06	1.39971e+06	996329	999781
Hex1Cer(t40:0)	Hex1Cer	M+HCOO	846.668	15.7267	C47 H92 O11 N1	4.46075e+06	81666	3.66784e+06	4.86756e+06	207572	472889	82312.3	757108	431060	608705	498066	427497	1.14596e+06	1.22505e+06	1.13821e+06	1.17695e+06
Hex1Cer(t18:0_22:6)	Hex1Cer	M+HCOO	834.574	12.1494	C47 H80 O11 N1	51646.6	0	17796.3	61119.3	4.36285e+06	5.30068e+06	1.70818e+06	7.73199e+06	4.54389e+06	6.46795e+06	4.96643e+06	4.0524e+06	3.65851e+06	3.89111e+06	2.34821e+06	2.37149e+06
Hex1Cer(t41:0)	Hex1Cer	M+CH3COO	874.699	17.4938	C49 H96 O11 N1	1.4394e+06	8712.5	970722	1.35168e+06	1.24823e+06	1.27464e+06	224986	1.53429e+06	523445	423102	608186	566082	651589	560320	706303	726855
Hex1Cer(t17:0_24:6)	Hex1Cer	M-H	802.584	14.7011	C47 H80 O9 N1	36441.2	0	124155	148373	8.85871e+06	8.72048e+06	2.4967e+06	7.40226e+06	2.96358e+06	1.08433e+07	3.34047e+06	2.86171e+06	4.36317e+06	2.81987e+06	3.19605e+06	3.66665e+06
Hex1Cer(t17:1_24:6)	Hex1Cer	M-H	800.568	13.3842	C47 H78 O9 N1	0	0	0	0	1.309e+06	918037	83375.3	2.1677e+06	1.17208e+06	1.20543e+06	933318	1.10176e+06	437228	584413	138799	495397
Hex1Cer(t42:0)	Hex1Cer	M+HCOO	874.699	16.8007	C49 H96 O11 N1	1.4403e+07	274317	1.17855e+07	1.52789e+07	1.40932e+06	1.25632e+06	274877	1.26901e+06	462443	621075	556783	365261	2.85231e+06	3.0732e+06	2.95203e+06	3.47412e+06
Hex1Cer(t42:1)	Hex1Cer	M+HCOO	872.683	17.096	C49 H94 O11 N1	1.49375e+07	213316	1.30482e+07	1.5658e+07	20584	39322.2	197035	1.42538e+06	22086.7	24695.1	889470	35982.2	1.38926e+06	3.02521e+06	3.3048e+06	3.08295e+06
Hex1Cer(t42:2)	Hex1Cer	M+HCOO	870.668	15.9627	C49 H92 O11 N1	1.29865e+07	180106	1.07618e+07	1.31573e+07	296902	412660	7903.36	83681.5	428229	417961	300309	389436	2.46354e+06	3.10871e+06	2.71438e+06	3.46633e+06
Hex1Cer(t44:1)	Hex1Cer	M+HCOO	900.715	16.7282	C51 H98 O11 N1	4.10797e+06	98022.6	3.57364e+06	4.57172e+06	318.651	266.981	1747.14	3013.32	151.208	2223.69	530.794	0	656559	976027	856272	1.01104e+06
Hex2Cer(d32:1)	Hex2Cer	M+HCOO	878.585	10.4558	C45 H84 O15 N1	0	0	0	0	444783	579171	2801.89	1.29763e+06	1.05472e+06	2.17354e+06	1.44429e+06	1.10755e+06	798957	798830	464565	508591
Hex2Cer(d34:1)	Hex2Cer	M+HCOO	906.616	11.976	C47 H88 O15 N1	104381	12855.7	86760.6	148079	1.98532e+07	2.63686e+07	9.46071e+06	3.51605e+07	4.29678e+07	5.9784e+07	5.19793e+07	3.94213e+07	2.61933e+07	2.66516e+07	1.60066e+07	1.66324e+07
Hex2Cer(d35:1)	Hex2Cer	M+HCOO	920.632	12.7018	C48 H90 O15 N1	0	0	0	0	475752	558751	178732	926720	1.31562e+06	1.73097e+06	1.53152e+06	938484	756770	770284	428101	497911
Hex2Cer(d36:1)	Hex2Cer	M+HCOO	934.647	13.4243	C49 H92 O15 N1	1464.1	0	4239.81	3457.26	2.53638e+06	2.84351e+06	1.20721e+06	5.18487e+06	6.07034e+06	6.92836e+06	6.80311e+06	5.22402e+06	2.7477e+06	3.23623e+06	2.09701e+06	2.20286e+06
Hex2Cer(d38:1)	Hex2Cer	M+HCOO	962.679	14.7406	C51 H96 O15 N1	9930.54	1367.47	0	0	2.30182e+06	3.13538e+06	946459	3.03095e+06	5.326e+06	5.9456e+06	5.836e+06	4.51896e+06	2.54752e+06	2.5582e+06	1.8267e+06	1.90535e+06
Hex2Cer(d40:1)	Hex2Cer	M+HCOO	990.71	15.9547	C53 H100 O15 N1	57671.3	635.163	12964.9	76474.1	1.16088e+07	1.41418e+07	3.82219e+06	1.32194e+07	2.24042e+07	2.50726e+07	2.60171e+07	2.38764e+07	8.74948e+06	9.26073e+06	7.98816e+06	8.94692e+06
Hex2Cer(d41:1)	Hex2Cer	M+HCOO	1004.73	16.4859	C54 H102 O15 N1	33520.9	1684.93	12186.5	40461.3	2.10897e+06	2.62658e+06	676920	2.55359e+06	3.22746e+06	3.6492e+06	3.74944e+06	3.19698e+06	1.29628e+06	1.47829e+06	1.30033e+06	1.59005e+06
Hex2Cer(d41:2)	Hex2Cer	M+HCOO	1002.71	15.2367	C54 H100 O15 N1	0	22329.3	0	10296.6	1.05779e+06	1.21084e+06	273228	2.42588e+06	2.49164e+06	4.59256e+06	3.1319e+06	2.49582e+06	1.31692e+06	1.20932e+06	1.1524e+06	1.15962e+06
Hex2Cer(d42:1)	Hex2Cer	M+HCOO	1018.74	16.973	C55 H104 O15 N1	665145	5929.73	472666	693303	3.19845e+07	4.11462e+07	1.0791e+07	3.64109e+07	4.3268e+07	4.85818e+07	4.98906e+07	4.70506e+07	1.25897e+07	1.75492e+07	1.90332e+07	2.18745e+07
Hex2Cer(d42:2)	Hex2Cer	M+HCOO	1016.73	15.8318	C55 H102 O15 N1	768402	22745.7	567808	853636	1.6107e+07	2.03941e+07	5.17806e+06	4.03476e+07	4.64375e+07	7.73879e+07	5.24987e+07	4.62336e+07	1.82596e+07	1.85487e+07	1.78073e+07	1.94539e+07
Hex2Cer(d43:1)	Hex2Cer	M+HCOO	1032.76	17.2721	C56 H106 O15 N1	0	2317.73	0	0	263748	368639	91187.1	554214	382987	520638	332942	394935	136646	172257	171648	193013
Hex2Cer(d43:2)	Hex2Cer	M+HCOO	1030.74	16.3867	C56 H104 O15 N1	40612.1	1080.87	9789.15	53164	2.19226e+06	2.15982e+06	725414	1.93481e+06	3.92393e+06	6.23997e+06	4.94353e+06	4.14789e+06	1.773e+06	2.02804e+06	2.04221e+06	2.11341e+06
Hex2Cer(d44:1)	Hex2Cer	M+HCOO	1046.77	17.7654	C57 H108 O15 N1	109116	2092.46	41821.3	84069.6	1.56975e+06	1.64148e+06	401485	1.45221e+06	1.36798e+06	1.40831e+06	1.53654e+06	1.54981e+06	643006	510940	791603	833913
Hex2Cer(d44:2)	Hex2Cer	M+HCOO	1044.76	16.8669	C57 H106 O15 N1	186049	715.757	124076	217583	1.6965e+06	2.15607e+06	494939	3.35486e+06	3.28777e+06	5.1243e+06	3.70737e+06	3.41481e+06	1.44565e+06	1.56387e+06	1.47981e+06	1.64197e+06
Hex2Cer(d44:3)	Hex2Cer	M+HCOO	1042.74	15.897	C57 H104 O15 N1	0	8853.7	0	0	196200	265828	10414.3	658374	676068	1.03612e+06	791155	715401	79214.3	301195	237363	36961.2
Hex2Cer(m34:0+O)	Hex2Cer	M+HCOO	908.632	12.5069	C47 H90 O15 N1	0	0	0	0	1.39059e+06	1.71672e+06	524816	2.70955e+06	2.82759e+06	3.19877e+06	3.14371e+06	2.32551e+06	1.80571e+06	1.69119e+06	1.03915e+06	1.16589e+06
Hex2Cer(m42:0+O)	Hex2Cer	M+HCOO	1020.76	17.2763	C55 H106 O15 N1	6421.01	4540.91	1522.72	13474.6	1.0968e+06	1.35389e+06	357203	939484	1.25262e+06	1.01095e+06	1.25492e+06	1.26372e+06	502648	485577	564284	656141
Hex3Cer(d34:1)	Hex3Cer	M+HCOO	1068.67	11.684	C53 H98 O20 N1	808305	35865.4	526339	1.1691e+06	8.29785e+06	9.34013e+06	2.36188e+06	7.77863e+06	4.49846e+06	5.41711e+06	5.67923e+06	4.1931e+06	5.28341e+06	5.22657e+06	2.96813e+06	3.1474e+06
Hex3Cer(d36:1)	Hex3Cer	M+HCOO	1096.7	13.1265	C55 H102 O20 N1	6264.26	4530.86	8507.74	26837.5	1.33347e+06	1.58825e+06	357478	983411	848312	737631	997608	670746	720880	727336	479975	521848
Hex3Cer(d40:1)	Hex3Cer	M+HCOO	1152.76	15.6867	C59 H110 O20 N1	300919	0	197440	398465	3.09027e+06	3.65539e+06	800594	1.51213e+06	2.1574e+06	1.66631e+06	2.47525e+06	2.1851e+06	1.14274e+06	1.12898e+06	1.19654e+06	1.22045e+06
Hex3Cer(d41:1)	Hex3Cer	M+HCOO	1166.78	16.278	C60 H112 O20 N1	236885	1614	113578	249845	1.47673e+06	1.44565e+06	441522	270014	792611	553185	895149	771339	512776	520155	502730	584992
Hex3Cer(d42:1)	Hex3Cer	M+HCOO	1180.79	16.7549	C61 H114 O20 N1	1.13774e+06	2565.65	737479	1.38684e+06	9.41492e+06	1.13143e+07	2.37263e+06	4.7449e+06	4.09978e+06	3.42916e+06	4.94862e+06	4.44916e+06	2.77185e+06	3.1495e+06	2.86941e+06	3.35761e+06
LBPA(16:0_18:0)	LBPA	M-H	749.534	13.6939	C40 H78 O10 P1	6.22194e+06	227708	4.32559e+06	6.55718e+06	1.58478e+06	928195	106018	2.61432e+06	581271	888229	627800	869066	1.90399e+06	2.01381e+06	1.66111e+06	1.6889e+06
LBPA(16:0_20:1)	LBPA	M-H	775.549	13.6962	C42 H80 O10 P1	2.91489e+07	966494	2.0058e+07	3.15858e+07	1.11697e+07	1.03932e+07	2.89632e+06	1.82414e+07	7.23672e+06	1.14201e+07	8.86682e+06	6.9421e+06	1.29347e+07	1.33089e+07	1.04614e+07	1.01576e+07
LPC(16:0)	LPC	M+HCOO	540.331	3.194	C25 H51 O9 N1 P1	5.87864e+06	481204	5.2546e+06	4.7192e+06	5.79898e+06	4.89922e+06	2.6064e+06	6.11843e+06	2.60416e+06	6.21265e+06	1.92419e+06	2.29156e+06	3.80968e+06	3.85788e+06	3.77851e+06	3.92907e+06
LPC(18:0)	LPC	M+HCOO	568.362	4.78628	C27 H55 O9 N1 P1	2.18414e+06	37126.1	1.99e+06	1.65385e+06	3.85334e+06	4.04074e+06	1.50423e+06	5.9347e+06	1.40834e+06	3.35569e+06	1.47986e+06	1.74904e+06	2.03097e+06	2.12008e+06	2.09659e+06	2.16161e+06
LPE(16:0)	LPE	M-H	452.278	3.379	C21 H43 O7 N1 P1	1.02253e+06	61962.2	782678	829487	409652	344073	227348	597955	285483	892806	188746	194705	459843	462913	461054	441566
LPE(18:0)	LPE	M-H	480.31	5.04427	C23 H47 O7 N1 P1	4.37833e+06	241806	3.23589e+06	3.27025e+06	1.65414e+06	1.52593e+06	738080	2.3855e+06	1.01403e+06	2.67437e+06	1.06437e+06	939868	1.88632e+06	1.92889e+06	1.9411e+06	1.94265e+06
LPE(18:1)	LPE	M-H	478.294	3.33231	C23 H45 O7 N1 P1	500344	54987.3	409344	350709	1.20654e+06	1.04059e+06	491250	1.70113e+06	621760	727602	525036	449930	664849	562478	670995	664935
LPE(20:4)	LPE	M-H	500.278	2.41	C25 H43 O7 N1 P1	390357	6368.72	288276	347737	812208	739274	430687	1.68726e+06	749234	778093	544444	476887	546749	605587	621654	613080
LPE(22:6)	LPE	M-H	524.278	2.2424	C27 H43 O7 N1 P1	182859	522.96	133823	149590	778994	706252	580160	1.98045e+06	768923	1.16178e+06	516429	404956	649447	609165	625060	584764
LPE(24:0)	LPE	M-H	564.403	10.1766	C29 H59 O7 N1 P1	204802	460.895	150804	225706	1.02628e+06	1.15758e+06	266541	860621	294832	567983	388438	232097	501263	501049	330971	344651
LPG(22:6)	LPG	M-H	555.273	1.9052	C28 H44 O9 N0 P1	409508	0	229698	267718	684472	760509	204469	2.09006e+06	926111	1.33398e+06	964151	1.15431e+06	759691	752328	722595	743602
MGDG(25:10)	MGDG	M+HCOO	657.292	10.9512	C35 H45 O12	0	560595	224427	259624	64667.5	640368	585103	371599	607714	775842	360919	150166	128760	260107	249802	261695
MGDG(30:1e)	MGDG	M+CH3COO	745.547	10.5796	C41 H77 O11	1.41373e+07	406671	1.12867e+07	1.96872e+07	1.10415e+07	1.38634e+07	2.73578e+06	2.05563e+07	7.21904e+06	1.26762e+07	1.03829e+07	8.20605e+06	1.36786e+07	1.28051e+07	8.53109e+06	8.97841e+06
MGDG(16:0_16:0)	MGDG	M+HCOO	775.558	14.2296	C42 H79 O12	182677	0	152948	188972	2.89221e+06	2.7895e+06	932287	3.00581e+06	2.44591e+06	3.60249e+06	2.75526e+06	2.43627e+06	1.60418e+06	1.80494e+06	1.36968e+06	1.42769e+06
MGDG(32:0e)	MGDG	M+HCOO	761.578	15.1126	C42 H81 O11	0.012	0	9208.94	27082.2	9.72306e+06	1.12474e+07	2.71149e+06	6.07148e+06	5.78276e+06	8.60586e+06	6.71852e+06	6.15842e+06	4.32247e+06	4.10224e+06	3.5682e+06	3.74265e+06
MGDG(16:0_16:1)	MGDG	M+HCOO	773.542	12.926	C42 H77 O12	18308	0	168649	320254	654350	321589	352776	1.49195e+06	1.099e+06	1.47594e+06	585039	618208	137424	664307	598865	231813
MGDG(32:1e)	MGDG	M+CH3COO	773.578	12.0774	C43 H81 O11	3.03004e+06	119170	2.904e+06	4.32306e+06	3.32105e+06	4.42343e+06	1.31795e+06	7.48219e+06	3.32561e+06	4.77466e+06	3.87339e+06	3.03247e+06	4.24336e+06	4.15575e+06	2.56612e+06	2.71829e+06
MGDG(16:0_18:0)	MGDG	M+HCOO	803.589	15.5107	C44 H83 O12	1697.32	0	1058.49	765.729	1.4914e+06	1.46733e+06	278091	1885101	1.07404e+06	1.85216e+06	1.3574e+06	1.21577e+06	684821	725809	684721	677990
MGDG(34:0e)	MGDG	M+CH3COO	803.625	14.804	C45 H87 O11	8.18633e+06	218200	7.65111e+06	9.83488e+06	6.34526e+06	8.27044e+06	2.1681e+06	9.58493e+06	7.76683e+06	1.08714e+07	8.94034e+06	7.85007e+06	7.27138e+06	7.24002e+06	5.43747e+06	5.63317e+06
MGDG(16:0_18:1)	MGDG	M+HCOO	801.573	14.253	C44 H81 O12	38506.3	0	35801.8	46253.8	1.50307e+06	1.88992e+06	525173	2.07154e+06	2.35163e+06	3.6214e+06	2.96872e+06	2.63944e+06	1.37025e+06	1.50693e+06	1.121e+06	1.19324e+06
MGDG(34:1e)	MGDG	M+CH3COO	801.61	13.5338	C45 H85 O11	860130	2293.62	843018	1.14373e+06	689574	874171	260960	1.5071e+06	667146	865966	819306	602726	724858	729706	528645	606366
MGDG(34:4e)	MGDG	M-H	735.542	12.4092	C43 H75 O9	1.97726e+06	42304.6	2.30709e+06	2.41625e+06	5.59565e+06	5.8642e+06	2.11231e+06	8.1849e+06	4.43729e+06	5.11609e+06	4.72416e+06	4.70915e+06	4.98075e+06	5.09938e+06	4.25889e+06	4.7896e+06
MGDG(36:0e)	MGDG	M+CH3COO	831.657	15.174	C47 H91 O11	1.02965e+06	1375.26	1.04668e+06	1.39342e+06	215236	211290	13325.3	482526	446247	642217	537953	431991	505007	468223	396826	457477
MGDG(36:1e)	MGDG	M+CH3COO	829.641	14.6649	C47 H89 O11	7.59748e+06	196159	7.2933e+06	1.05842e+07	1.26965e+06	1.45832e+06	289149	3.79401e+06	3.42139e+06	4.92633e+06	3.73963e+06	3.01832e+06	4.20951e+06	4.37386e+06	2.78159e+06	3.10205e+06
MGDG(47:12)	MGDG	M+HCOO	961.605	8.09366	C57 H85 O12	1.17977e+06	2.24639e+06	1.54393e+06	1.60976e+06	1.32266e+06	1.17149e+06	1.48103e+06	106452	1.84068e+06	1.82394e+06	2.11254e+06	1.44422e+06	1.75539e+06	1.73326e+06	1.10428e+06	1.0238e+06
MGMG(28:0)	MGMG	M+CH3COO	719.531	10.411	C39 H75 O11	1.02966e+07	307819	9.177e+06	1.31877e+07	7.2751e+06	1.02585e+07	2.94203e+06	1.76733e+07	8.17138e+06	2.09671e+07	1.04958e+07	8.4737e+06	1.09546e+07	1.10062e+07	7.10733e+06	7.61983e+06
MGMG(29:0)	MGMG	M+CH3COO	733.547	11.1761	C40 H77 O11	5.34483e+06	200892	4.84412e+06	7.31734e+06	4.22771e+06	5.65473e+06	1.22096e+06	7.17592e+06	3.35026e+06	7.08192e+06	5.16257e+06	3.90831e+06	5.57212e+06	5.47042e+06	3.00185e+06	3.34178e+06
MGMG(30:0)	MGMG	M+CH3COO	747.563	11.9549	C41 H79 O11	1.64582e+08	1.17318e+07	1.38029e+08	2.50115e+08	1.80538e+08	2.47396e+08	8.25008e+07	2.8111e+08	1.98048e+08	2.95644e+08	1.2714e+08	1.91119e+08	2.35044e+08	2.19769e+08	1.49582e+08	1.46282e+08
MGMG(30:1)	MGMG	M+CH3COO	745.547	10.5732	C41 H77 O11	1.41379e+07	406495	1.12877e+07	1.96795e+07	1.10366e+07	1.38612e+07	1.3336e+06	1.16191e+07	7.2289e+06	1.26768e+07	1.0384e+07	8.20535e+06	1.36763e+07	1.28057e+07	8.55113e+06	8.97429e+06
MGMG(31:0)	MGMG	M+CH3COO	761.578	12.703	C42 H81 O11	3.77989e+06	115284	3.60856e+06	5.32366e+06	3.20813e+06	3.55456e+06	1.2787e+06	6.22975e+06	4.87803e+06	7.38642e+06	5.75143e+06	4.44852e+06	4.7165e+06	4.78322e+06	2.91067e+06	3.35186e+06
MGMG(32:0)	MGMG	M+CH3COO	775.594	13.435	C43 H83 O11	1.11956e+07	951078	1.08184e+07	1.6588e+07	1.2271e+07	1.52794e+07	5.79067e+06	2.48001e+07	1.75497e+07	2.42441e+07	1.93917e+07	1.61267e+07	1.54633e+07	1.64164e+07	1.01423e+07	1.09075e+07
MGMG(32:1)	MGMG	M+CH3COO	773.578	12.0932	C43 H81 O11	3.03004e+06	119170	2.904e+06	4.32306e+06	3.32105e+06	4.42343e+06	1.31795e+06	7.48219e+06	3.32561e+06	4.77466e+06	3.87339e+06	3.03247e+06	4.24336e+06	4.15575e+06	2.56612e+06	2.71829e+06
MGMG(33:2)	MGMG	M+CH3COO	785.578	12.445	C44 H81 O11	3715.86	0	0	0.002	23732.7	4140.19	527094	253780	352944	2.21443e+06	0	1461.92	270585	263382	92730	68894
MGMG(34:0)	MGMG	M+CH3COO	803.625	14.812	C45 H87 O11	8.18636e+06	204665	7.65142e+06	9.83473e+06	5.72189e+06	8.27125e+06	2.1992e+06	9.56333e+06	7.7672e+06	1.08712e+07	8.94331e+06	7.86179e+06	7.27125e+06	7.23991e+06	5.43749e+06	5.63424e+06
MGMG(34:1)	MGMG	M+CH3COO	801.61	13.5263	C45 H85 O11	860130	2293.62	843018	1.14373e+06	689574	874171	260960	1.5071e+06	667146	865966	819306	602726	724858	729706	528645	606366
MGMG(36:0)	MGMG	M+CH3COO	831.657	16.0378	C47 H91 O11	3.8602e+07	838294	3.62866e+07	4.64322e+07	2.06798e+07	2.66884e+07	6.1998e+06	3.00074e+07	2.43332e+07	3.42801e+07	2.90828e+07	2.72123e+07	2.09132e+07	2.22966e+07	2.03924e+07	2.24002e+07
MGMG(36:1)	MGMG	M+CH3COO	829.641	14.667	C47 H89 O11	7.59748e+06	196159	7.2933e+06	1.05187e+07	1.23585e+06	1.45832e+06	289149	3.74111e+06	3.42139e+06	4.86234e+06	3.73963e+06	3.01832e+06	4.20951e+06	4.37386e+06	2.78159e+06	3.10205e+06
MGMG(37:0)	MGMG	M+CH3COO	845.672	16.5916	C48 H93 O11	1.11428e+07	210771	1.04126e+07	1.22806e+07	3.68525e+06	4.93927e+06	956331	6.31136e+06	3.27729e+06	4.9348e+06	3.75254e+06	3.40362e+06	3.60216e+06	4.19375e+06	3.5987e+06	4.53744e+06
MGMG(37:1)	MGMG	M+CH3COO	843.657	15.299	C48 H91 O11	1.21748e+07	290174	1.10994e+07	1.41922e+07	2.51865e+06	2.84894e+06	666899	6.10803e+06	4.28047e+06	8.02174e+06	4.82999e+06	4.45378e+06	4.95196e+06	4.88247e+06	4.53195e+06	4.49567e+06
MGMG(37:2)	MGMG	M+CH3COO	841.641	14.108	C48 H89 O11	1.00534e+06	1396.3	880000	1.16719e+06	1.16995e+06	1.21978e+06	407952	1.98664e+06	1.50561e+06	2.16943e+06	2.10448e+06	1.59424e+06	1.34759e+06	1.3646e+06	1.12135e+06	1.00108e+06
MGMG(38:0)	MGMG	M+CH3COO	859.688	17.0703	C49 H95 O11	4.93409e+07	940495	4.76355e+07	5.48864e+07	4.79607e+07	5.94324e+07	1.57816e+07	5.56577e+07	3.30084e+07	4.89712e+07	3.78882e+07	3.92745e+07	2.15046e+07	2.15416e+07	3.06794e+07	3.55239e+07
MGMG(38:1)	MGMG	M+CH3COO	857.672	15.9145	C49 H93 O11	1.44012e+08	3.87262e+06	1.34456e+08	1.83694e+08	3.73765e+07	5.06628e+07	1.34266e+07	7.48189e+07	6.15795e+07	8.7692e+07	7.29563e+07	67647995	4.2922e+07	6.48566e+07	5.72385e+07	6.31894e+07
MGMG(38:2)	MGMG	M+CH3COO	855.657	14.7629	C49 H91 O11	2.35917e+07	506348	1.87552e+07	3.02384e+07	4.93304e+06	8.19162e+06	1.54648e+06	1.67944e+07	9.71319e+06	1.39936e+07	1.13584e+07	9.25884e+06	1.3703e+07	1.3022e+07	1.0731e+07	1.04741e+07
MGMG(39:1)	MGMG	M+CH3COO	871.688	16.4478	C50 H95 O11	3.67544e+06	16128.4	3.5435e+06	3.95952e+06	1.84248e+06	1.74175e+06	594217	2.30777e+06	1.79352e+06	2.59874e+06	2.23424e+06	2.07468e+06	1.68382e+06	1.86524e+06	1.78227e+06	1.90874e+06
MGMG(40:0)	MGMG	M+CH3COO	887.719	17.8834	C51 H99 O11	2.39785e+06	17003.6	2.1402e+06	2.25851e+06	1.11641e+06	1.08048e+06	225183	1.31274e+06	700079	981873	676230	752859	853995	761260	1.08521e+06	975586
MGMG(40:1)	MGMG	M+CH3COO	885.704	16.9705	C51 H97 O11	1.12482e+07	188982	1.01805e+07	1.12071e+07	1.53373e+06	2.04668e+06	517535	2.81959e+06	2.48073e+06	3.40878e+06	2.80739e+06	2.83094e+06	934025	2.81593e+06	3.36921e+06	3.54309e+06
PC(14:0_14:0)	PC	M+HCOO	722.498	10.4103	C37 H73 O10 N1 P1	1.93214e+07	532417	1.81172e+07	2.45302e+07	2.36834e+06	3.41298e+06	657252	6.77379e+06	1.48844e+06	2.83255e+06	2.02618e+06	1.66758e+06	7.65669e+06	7.63835e+06	4.92566e+06	5.30286e+06
PC(12:0e_16:0)	PC	M+HCOO	708.518	11.28	C37 H75 O9 N1 P1	9873.96	0	0	2478.12	209907	102167	16742.5	1.72074e+06	179836	400219	287728	230890	291790	275905	187539	122905
PC(16:0e_14:0)	PC	M+HCOO	736.55	12.7475	C39 H79 O9 N1 P1	687648	2597.67	785686	1.00263e+06	4.26588e+06	4.58893e+06	1.59191e+06	5.32226e+06	2.26874e+06	2.98391e+06	2.45561e+06	2.11568e+06	2.72577e+06	2.73906e+06	1.60317e+06	2.05829e+06
PC(16:1_14:0)	PC	M+HCOO	748.513	10.5453	C39 H75 O10 N1 P1	4.88318e+07	1.18207e+06	3.52363e+07	5.54904e+07	5.77672e+06	7.6472e+06	1.33915e+06	1.00854e+07	5.86529e+06	8.47625e+06	7.19817e+06	6.47724e+06	1.6662e+07	1.80449e+07	1.13265e+07	1.20074e+07
PC(16:1e_14:0)	PC	M+HCOO	734.534	12.4833	C39 H77 O9 N1 P1	642723	16740.4	774203	845236	3.09565e+06	2.52396e+06	962010	3.38086e+06	1.7274e+06	2.07718e+06	2.02214e+06	1.91824e+06	1.50748e+06	2.17588e+06	1.91087e+06	2.3235e+06
PC(15:0_16:0)	PC	M+HCOO	764.545	12.3214	C40 H79 O10 N1 P1	5.9154e+07	2.20401e+06	5.14828e+07	7.52402e+07	1.27001e+07	1.49659e+07	4.59124e+06	2.65389e+07	1.98364e+07	2.76089e+07	2.24693e+07	1.7485e+07	3.61474e+07	3.59699e+07	2.14766e+07	2.43015e+07
PC(15:0_16:1)	PC	M+HCOO	762.529	10.9821	C40 H77 O10 N1 P1	5.82469e+06	50284.8	4.62564e+06	7.33537e+06	443370	598892	93345.1	1.29571e+06	587178	986186	1.07569e+06	797110	2.34582e+06	2.59582e+06	1.4386e+06	1.47736e+06
PC(17:1_14:0)	PC	M+HCOO	762.529	11.2647	C40 H77 O10 N1 P1	7.65824e+06	861631	7.52023e+06	1.10376e+07	1.55656e+06	1.50072e+06	570559	5.57776e+06	2.53889e+06	3.77158e+06	3.40796e+06	4.90039e+06	1.04829e+07	4.80705e+06	3.16879e+06	3.47279e+06
PC(16:0e_16:0)	PC	M+HCOO	764.581	14.1395	C41 H83 O9 N1 P1	3.34937e+06	72426.1	3.18981e+06	3.92704e+06	4.48401e+07	5.78816e+07	1.61389e+07	4.52752e+07	1.43367e+07	2.06829e+07	1.63382e+07	1.44012e+07	1.83273e+07	1.98303e+07	1.39109e+07	1.51083e+07
PC(16:1e_16:1)	PC	M+HCOO	760.55	12.6208	C41 H79 O9 N1 P1	589639	2635.68	556044	685574	2.39843e+06	2.54962e+06	837851	2.07223e+06	956882	1.436e+06	1.09815e+06	867165	1.30692e+06	1.30036e+06	821630	949749
PC(16:0_17:0)	PC	M+HCOO	792.576	13.9774	C42 H83 O10 N1 P1	4.25877e+06	146374	3.7778e+06	5.06439e+06	2.51607e+06	2.99428e+06	984652	8.75382e+06	2.5053e+06	3.78839e+06	2.68683e+06	2.47871e+06	3.34729e+06	3.28919e+06	2.35849e+06	2.31916e+06
PC(16:0e_17:0)	PC	M+HCOO	778.597	14.7959	C42 H85 O9 N1 P1	146923	0	23171.8	176124	1.60487e+06	1.99405e+06	496694	2.6237e+06	1.02107e+06	1.89171e+06	1.37767e+06	1.18249e+06	930470	1.09536e+06	860444	824242
PC(17:1_16:0)	PC	M+HCOO	790.56	12.6769	C42 H81 O10 N1 P1	6.39763e+07	1.67723e+06	6.54603e+07	8.52662e+07	5.03161e+07	5.78546e+07	1.89642e+07	8.22282e+07	4.71594e+07	6.12809e+07	5.3564e+07	4.17216e+07	6.72247e+07	6.1092e+07	3.75302e+07	4.2749e+07
PC(17:1_16:1)	PC	M+HCOO	788.545	11.363	C42 H79 O10 N1 P1	8.02776e+06	249165	7.26077e+06	1.05379e+07	3.6252e+06	6.13794e+06	1.19633e+06	2.51704e+06	2.41852e+06	2.87368e+06	7.10758e+06	1.05347e+06	4.52149e+06	4.05271e+06	2.31225e+06	1.29984e+06
PC(16:1e_17:1)	PC	M+HCOO	774.565	13.3502	C42 H81 O9 N1 P1	93142.2	0	67918.6	118910	5.12973e+06	4.57291e+06	1.72194e+06	6.33118e+06	2.76171e+06	3.8587e+06	3.31599e+06	2.81247e+06	2.5524e+06	2.66169e+06	2.12164e+06	2.0869e+06
PC(18:0e_16:0)	PC	M+HCOO	792.612	15.4314	C43 H87 O9 N1 P1	1.3813e+06	935.433	1.28856e+06	1.53275e+06	2.49297e+07	2.76355e+07	6.45951e+06	2.76164e+07	1.03866e+07	1.65642e+07	1.20186e+07	1.14113e+07	1.00082e+07	9.54093e+06	8.28792e+06	9.29108e+06
PC(18:1e_16:0)	PC	M+HCOO	790.597	15.2407	C43 H85 O9 N1 P1	1.76479e+06	996.221	1.5899e+06	1.97377e+06	2.5799e+06	2.43363e+06	660317	4.47753e+06	1.13583e+06	1.68057e+06	1.26393e+06	427584	1.55569e+06	1.44896e+06	1.35234e+06	1.29241e+06
PC(16:0e_18:2)	PC	M+HCOO	788.581	12.8703	C43 H83 O9 N1 P1	305202	0	604888	639505	1.66288e+06	1.71716e+06	600716	1.63559e+06	1.76994e+06	2.03095e+06	1.83537e+06	1.55533e+06	1.26692e+06	1.61691e+06	944468	1.03072e+06
PC(18:2e_16:0)	PC	M+HCOO	788.581	13.9911	C43 H83 O9 N1 P1	2.98204e+06	65026.5	2.04976e+06	3.50976e+06	3.59627e+07	4.48374e+07	1.31232e+07	4.24718e+07	2.57874e+07	3.27186e+07	2.79049e+07	2.35242e+07	2.07261e+07	2.20576e+07	1.53752e+07	1.62951e+07
PC(16:0_18:3)	PC	M+HCOO	800.545	11.5937	C43 H79 O10 N1 P1	3885.99	2206.3	49764.6	42843.4	18731.5	53686	2069.85	119913	10248.2	57751.4	20183.7	59484.9	25726.8	17990.3	15416.8	24213
PC(16:1e_18:2)	PC	M+HCOO	786.565	12.883	C43 H81 O9 N1 P1	117451	0	123024	325104	2.89751e+06	3.26321e+06	727097	3.64152e+06	1.85476e+06	1.96196e+06	1.74859e+06	1.40284e+06	1.55675e+06	1.99374e+06	1.13817e+06	1.10916e+06
PC(14:0_20:4)	PC	M+HCOO	798.529	10.5649	C43 H77 O10 N1 P1	5.07938e+06	117704	4.28709e+06	6.33641e+06	1.27729e+06	1.7653e+06	298812	3.85864e+06	2.25563e+06	3.43753e+06	2.62556e+06	2.07306e+06	3.06644e+06	3.07176e+06	2.10778e+06	2.2673e+06
PC(14:0_20:5)	PC	M+HCOO	796.513	9.60158	C43 H75 O10 N1 P1	691297	14640.8	699431	1.01631e+06	130485	170816	89678.3	325425	104215	241288	101751	77713.4	288803	376513	218739	246367
PC(18:0_17:0)	PC	M+HCOO	820.607	14.9995	C44 H87 O10 N1 P1	2.78545e+06	97012.7	2.71263e+06	3.85118e+06	1.24896e+06	2.4355e+06	576747	3.90046e+06	1.59404e+06	2.94897e+06	2.40988e+06	1.70898e+06	2.60887e+06	1.65904e+06	2.5036e+06	1.34637e+06
PC(16:0_19:0)	PC	M+HCOO	820.607	15.2647	C44 H87 O10 N1 P1	948160	949.536	825378	1.0737e+06	410763	485525	75402.2	1.70623e+06	294368	509006	240678	314173	493116	500814	436092	461935
PC(17:0_18:1)	PC	M+HCOO	818.592	13.7684	C44 H85 O10 N1 P1	2.90238e+07	1.5724e+06	3.05416e+07	4.11176e+07	2.03382e+07	2.67335e+07	7.89709e+06	4.85653e+07	2.37751e+07	2.78747e+07	2.73222e+07	2.27803e+07	2.54622e+07	2.684e+07	1.90801e+07	1.91985e+07
PC(17:1_18:1)	PC	M+HCOO	816.576	12.7476	C44 H83 O10 N1 P1	3.98043e+07	1.16464e+06	3.87041e+07	5.30055e+07	2.72434e+07	3.04789e+07	1.00352e+07	5.24296e+07	3.3929e+07	4.08281e+07	3.67555e+07	2.85969e+07	3.88206e+07	3.84219e+07	2.31883e+07	2.77918e+07
PC(20:0_16:0)	PC	M+HCOO	834.623	15.8552	C45 H89 O10 N1 P1	1.75612e+06	27233.6	1.49459e+06	2.0668e+06	2.13365e+06	2.91158e+06	330883	5.65602e+06	737716	1.1268e+06	884067	493835	1.08922e+06	1.31998e+06	1.28425e+06	1.35405e+06
PC(20:0e_16:0)	PC	M+HCOO	820.644	16.5725	C45 H91 O9 N1 P1	1.39026e+06	1249.47	1.34686e+06	1.5839e+06	1.2486e+06	2.16703e+06	307081	1.95915e+06	452870	770503	469549	413058	591605	749203	672190	784499
PC(18:0e_18:1)	PC	M+HCOO	818.628	15.4756	C45 H89 O9 N1 P1	1.75447e+06	10542.2	1.49931e+06	1.74226e+06	1.35407e+07	1.50384e+07	3.55954e+06	9.52624e+06	8.1981e+06	9.45595e+06	6.66404e+06	7.37794e+06	4.12684e+06	5.19771e+06	5.34675e+06	4.95223e+06
PC(18:1_18:1)	PC	M+HCOO	830.592	13.4437	C45 H85 O10 N1 P1	3.51352e+08	2.65821e+07	3.51049e+08	5.35196e+08	2.55884e+08	2.49458e+08	9.17696e+07	3.74854e+08	2.4203e+08	2.94504e+08	2.69898e+08	2.15439e+08	3.09405e+08	3.11414e+08	2.00138e+08	2.08789e+08
PC(18:1e_18:1)	PC	M+HCOO	816.612	14.1907	C45 H87 O9 N1 P1	1.79435e+06	9009.16	1.7861e+06	2.23481e+06	7.05222e+06	9.11095e+06	2.2843e+06	5.78158e+06	7.04307e+06	8.03833e+06	7.72758e+06	6.49791e+06	4.5355e+06	4.48955e+06	3.53356e+06	3.35959e+06
PC(18:0e_18:2)	PC	M+HCOO	816.612	14.4545	C45 H87 O9 N1 P1	164653	66931.3	163658	41990.2	2.89335e+06	3.16837e+06	953202	2.1244e+06	1.63834e+06	2.87881e+06	1.48361e+06	1.11119e+06	959893	1.21941e+06	767883	1.32769e+06
PC(16:0_20:3)	PC	M+HCOO	828.576	12.5887	C45 H83 O10 N1 P1	2.01929e+07	348372	1.84051e+07	2.53239e+07	1.06082e+07	1.58725e+07	4.86077e+06	1.59316e+07	1.06192e+07	2.26313e+07	1.18845e+07	8.25348e+06	1.53603e+07	1.47799e+07	7.17537e+06	9.88931e+06
PC(16:0e_20:3)	PC	M+HCOO	814.597	13.4585	C45 H85 O9 N1 P1	9759.06	0	3463.15	46556.2	1.88074e+06	2.07462e+06	498199	843794	1.12461e+06	2.14978e+06	1.20238e+06	862689	643595	881086	568707	952233
PC(18:2e_18:1)	PC	M+HCOO	814.597	13.9715	C45 H85 O9 N1 P1	207890	0	235467	415532	3.74015e+06	4.08346e+06	1.89737e+06	2.64986e+06	3.84759e+06	3.87776e+06	4.454e+06	3.70046e+06	3.051e+06	3.27184e+06	1.61734e+06	2.40992e+06
PC(16:0_20:4)	PC	M+HCOO	826.56	12.0011	C45 H81 O10 N1 P1	2.64543e+07	1.96606e+06	2.63785e+07	4.55937e+07	2.23356e+07	3.052e+07	1.04701e+07	5.02838e+07	4.66159e+07	6.61497e+07	4.68631e+07	4.49716e+07	3.81913e+07	3.91713e+07	2.39433e+07	2.88193e+07
PC(16:0e_20:4)	PC	M+HCOO	812.581	12.833	C45 H83 O9 N1 P1	224408	841.411	216831	245685	1.73622e+07	1.9155e+07	6.03229e+06	1.98403e+07	3.23569e+07	3.86495e+07	3.60842e+07	2.9796e+07	1.85884e+07	1.88672e+07	1.23151e+07	1.36042e+07
PC(16:1_20:4)	PC	M+HCOO	824.545	10.6877	C45 H79 O10 N1 P1	8.28022e+06	87548.8	7.39395e+06	1.04159e+07	1.62523e+06	2.05102e+06	246639	2.52564e+06	2.56456e+06	3.87355e+06	3.32328e+06	2.57168e+06	4.53966e+06	4.54066e+06	1.91735e+06	3.20747e+06
PC(16:0_20:5)	PC	M+HCOO	824.545	11.0318	C45 H79 O10 N1 P1	1.20487e+07	329041	1.11649e+07	1.71642e+07	5.57672e+06	8.70045e+06	3.85912e+06	1.21093e+07	3.56774e+06	1.13402e+07	3.7494e+06	2.279e+06	8.6755e+06	8.32443e+06	4.73396e+06	5.38964e+06
PC(16:0e_20:5)	PC	M+HCOO	810.565	11.849	C45 H81 O9 N1 P1	7800.26	0	335.985	18006.9	2.2159e+06	2.47818e+06	857236	2.07199e+06	1.52772e+06	2.33971e+06	1.74268e+06	1.49477e+06	1.3874e+06	1.34502e+06	804508	921162
PC(16:1e_20:4)	PC	M+HCOO	810.565	12.5975	C45 H81 O9 N1 P1	584871	1857.11	514687	657927	8.1007e+06	8.71668e+06	2.81408e+06	1.54061e+07	1.30807e+07	1.70971e+07	1.53266e+07	1.21971e+07	9.08247e+06	9.37434e+06	5.80558e+06	6.15992e+06
PC(16:1_20:5)	PC	M+HCOO	822.529	9.74389	C45 H77 O10 N1 P1	839419	23371.3	937393	1.29596e+06	115397	152533	100799	268000	121852	430429	149674	78273.8	381263	413648	310378	342225
PC(14:0_22:6)	PC	M+HCOO	822.529	10.1277	C45 H77 O10 N1 P1	87657.8	2256.62	61388.1	98845.6	516.314	45203.2	11294.7	18488.1	513621	882596	564569	435472	693445	776653	431362	530899
PC(16:1e_20:5)	PC	M+HCOO	808.55	11.6173	C45 H79 O9 N1 P1	107261	0	107892	102353	1.36755e+06	1.6339e+06	491584	2.35799e+06	700018	1.42486e+06	685271	626817	922770	891823	573452	578861
PC(19:0_18:1)	PC	M+HCOO	846.623	15.0271	C46 H89 O10 N1 P1	5.89726e+06	136491	5.28915e+06	6.07381e+06	3.21602e+06	3.92099e+06	994863	6.61217e+06	2.06187e+06	2.72856e+06	1.87084e+06	1.62352e+06	4.97048e+06	4.98282e+06	2.33155e+06	2.49488e+06
PC(16:0_21:1)	PC	M+HCOO	846.623	15.2908	C46 H89 O10 N1 P1	4.4389e+06	46160.3	4.16138e+06	5.21064e+06	5.6739e+06	6.57289e+06	1.60222e+06	1.03475e+07	3.58278e+06	4.00397e+06	3.1659e+06	3.64037e+06	3.37569e+06	3.19493e+06	3.03158e+06	4.25851e+06
PC(19:1_18:2)	PC	M+HCOO	842.592	12.9371	C46 H85 O10 N1 P1	1.91967e+06	36201.9	1.69839e+06	3.33787e+06	2.20764e+06	3.32304e+06	825514	5.76321e+06	3.29776e+06	4.56571e+06	4.73146e+06	3.69187e+06	2.86371e+06	3.13202e+06	2.11713e+06	3.99177e+06
PC(17:1_20:2)	PC	M+HCOO	842.592	13.2409	C46 H85 O10 N1 P1	1.76103e+06	3921.77	1.63448e+06	2.2751e+06	1.15264e+06	1.62045e+06	469061	2.41867e+06	2.00211e+06	2.44049e+06	1.51379e+06	1.15031e+06	1.88787e+06	2.1695e+06	844276	64530.6
PC(17:0_20:4)	PC	M+HCOO	840.576	12.6975	C46 H83 O10 N1 P1	873227	848.673	808262	1.17661e+06	611345	524410	234275	2.33627e+06	1.86217e+06	2.27057e+06	2.00678e+06	1.66901e+06	1.43916e+06	1.29828e+06	710023	1.02033e+06
PC(37:4e)	PC	M+HCOO	826.597	13.5282	C46 H85 O9 N1 P1	0	0	2102.13	0	370876	427279	82868.5	691119	1.43217e+06	1.74429e+06	1.55153e+06	1.27833e+06	564232	601579	396401	425091
PC(17:1_20:4)	PC	M+HCOO	838.56	11.3614	C46 H81 O10 N1 P1	909318	9187.76	1.5415e+06	1.41731e+06	335249	1.09193e+06	219719	1.84894e+06	1.70918e+06	2.52074e+06	1.88682e+06	1.0559e+06	1.78436e+06	1.78229e+06	681343	429122
PC(16:0_22:0)	PC	M+HCOO	862.654	16.8868	C47 H93 O10 N1 P1	567957	0	498543	587337	513528	645471	143566	1.30254e+06	118179	189679	156114	128752	318790	345471	305319	320974
PC(16:0_22:1)	PC	M+HCOO	860.639	15.8726	C47 H91 O10 N1 P1	8.03035e+06	172732	6.94705e+06	8.88195e+06	1.32654e+07	1.5871e+07	4.45505e+06	1.80309e+07	3.93716e+06	5.04059e+06	4.37429e+06	4.01072e+06	5.93875e+06	6.50212e+06	5.98476e+06	6.44384e+06
PC(16:0e_22:2)	PC	M+HCOO	844.644	15.6141	C47 H91 O9 N1 P1	1.25086e+06	15377.5	1.16386e+06	1.34695e+06	1.57257e+06	1.87204e+06	518899	2.27639e+06	1.32578e+06	1.7894e+06	1.49701e+06	1.33415e+06	1.05042e+06	1.0736e+06	977913	1.04937e+06
PC(18:1_20:2)	PC	M+HCOO	856.607	13.5639	C47 H87 O10 N1 P1	9.77559e+06	142094	1.03468e+07	9.81565e+06	1.31054e+07	1.80037e+07	5.24494e+06	2.80244e+07	1.48294e+07	1.84253e+07	1.90412e+07	1.50354e+07	1.29561e+07	1.3734e+07	9.39945e+06	1.00398e+07
PC(18:0_20:3)	PC	M+HCOO	856.607	13.936	C47 H87 O10 N1 P1	7.31306e+06	239342	7.97365e+06	1.09659e+07	7.66227e+06	5.89677e+06	2.21458e+06	9.5998e+06	3.62251e+06	4.52912e+06	4.34175e+06	3.57483e+06	5.18152e+06	5.51549e+06	4.20759e+06	3.98667e+06
PC(18:0e_20:3)	PC	M+HCOO	842.628	14.7558	C47 H89 O9 N1 P1	224123	0	6402.38	20213.8	1.59649e+06	1.99165e+06	506534	1.59715e+06	1.28397e+06	1.64242e+06	1.4156e+06	1.08693e+06	1.06109e+06	862947	776842	756923
PC(18:1_20:3)	PC	M+HCOO	854.592	12.6308	C47 H85 O10 N1 P1	1.63526e+07	481574	1.6511e+07	2.49235e+07	5.75439e+06	6.76092e+06	1.76333e+06	2.4996e+07	7.04864e+06	1.2118e+07	1.36743e+07	6.60342e+06	1.14397e+07	1.29383e+07	8.12947e+06	6.88342e+06
PC(16:0_22:4)	PC	M+HCOO	854.592	12.9815	C47 H85 O10 N1 P1	7.06481e+06	201347	6.34579e+06	8.57698e+06	4.54414e+06	4.49711e+06	1.88351e+06	9.70785e+06	9.622e+06	1.05111e+07	1.08352e+07	8.66912e+06	3.41983e+06	8.39436e+06	5.25074e+06	6.87761e+06
PC(18:0_20:4)	PC	M+HCOO	854.592	13.3692	C47 H85 O10 N1 P1	7.38258e+06	612641	7.43328e+06	1.17479e+07	6.97112e+06	8.6702e+06	3.24153e+06	2.19884e+07	1.61982e+07	2.06901e+07	1.86573e+07	1.5741e+07	1.27232e+07	1.42087e+07	1.38372e+07	8.68919e+06
PC(16:0e_22:4)	PC	M+HCOO	840.612	13.6511	C47 H87 O9 N1 P1	0	0	0	0	442968	696083	334069	496134	587716	734355	740590	544231	659433	620976	56306.4	116446
PC(18:0e_20:4)	PC	M+HCOO	840.612	14.1724	C47 H87 O9 N1 P1	114289	0	123953	139849	7.55735e+06	9.78114e+06	2.74684e+06	1.07001e+07	1.49456e+07	1.74895e+07	1.68175e+07	1.40109e+07	7.60576e+06	8.39587e+06	5.78427e+06	5.76904e+06
PC(18:0_20:5)	PC	M+HCOO	852.576	12.4346	C47 H83 O10 N1 P1	3.4455e+06	104961	3.44564e+06	3.75831e+06	2.30338e+06	2.27711e+06	1.08688e+06	6.86553e+06	3.45944e+06	5.07621e+06	1.55069e+06	1.71799e+06	3.86766e+06	4.15758e+06	1.65725e+06	2.5457e+06
PC(18:0e_20:5)	PC	M+HCOO	838.597	13.241	C47 H85 O9 N1 P1	12009.9	3707.46	17747.4	7982.44	1.17954e+06	955129	249152	1.18755e+06	593865	526663	779184	697825	535615	579116	397959	441156
PC(18:1e_20:4)	PC	M+HCOO	838.597	13.9366	C47 H85 O9 N1 P1	111570	0	135686	182156	2.30847e+06	3.27126e+06	863470	4.96969e+06	4.61386e+06	5.41952e+06	5.0587e+06	4.17496e+06	2.57783e+06	2.83312e+06	1.89004e+06	1.95589e+06
PC(18:1_20:5)	PC	M+HCOO	850.56	11.1036	C47 H81 O10 N1 P1	8.61212e+06	305950	1.01613e+07	1.41057e+07	4.05072e+06	4.06216e+06	1.11786e+06	1.2207e+07	6.55795e+06	1.08841e+07	8.47606e+06	6.77886e+06	5.89079e+06	8.15274e+06	3.25119e+06	4.58363e+06
PC(16:0_22:6)	PC	M+HCOO	850.56	11.5677	C47 H81 O10 N1 P1	1.83654e+07	411617	1.78396e+07	2.30366e+07	1.96781e+07	1.98327e+07	6.67766e+06	3.55424e+07	1.96062e+07	2.60406e+07	1.66721e+07	1.88196e+07	1.97684e+07	2.02494e+07	1.59955e+07	1.70847e+07
PC(18:2e_20:4)	PC	M+HCOO	836.581	12.3819	C47 H83 O9 N1 P1	108959	1206.12	46246.7	17692.3	6.89254e+06	8.81152e+06	2.84892e+06	6.27015e+06	9.10517e+06	1.13018e+07	9.64657e+06	7.62474e+06	5.58934e+06	5.45409e+06	3.29131e+06	3.53648e+06
PC(16:1_22:6)	PC	M+HCOO	848.545	10.2677	C47 H79 O10 N1 P1	3.15283e+06	85594.3	2.6375e+06	3.49428e+06	1.88166e+06	2.34272e+06	583578	4.82708e+06	1.14118e+06	3.38208e+06	2.63778e+06	2.08099e+06	2.82604e+06	2.81179e+06	1.97033e+06	1.95292e+06
PC(16:1e_22:6)	PC	M+HCOO	834.565	12.1387	C47 H81 O9 N1 P1	52094.1	0	17850.3	61337.3	4.42561e+06	5.21542e+06	1.6834e+06	7.44414e+06	4.45289e+06	6.44604e+06	4.92158e+06	4.08656e+06	3.56627e+06	3.80033e+06	2.27946e+06	2.28598e+06
PC(17:0_22:1)	PC	M+HCOO	874.654	16.0419	C48 H93 O10 N1 P1	4.67669e+06	146921	4.55116e+06	6.80565e+06	1.66363e+06	2.30776e+06	656264	3.14643e+06	2.30231e+06	3.03084e+06	2.75444e+06	2.63933e+06	2.3993e+06	2.50162e+06	2.15845e+06	2.55176e+06
PC(18:0_21:1)	PC	M+HCOO	874.654	16.3227	C48 H93 O10 N1 P1	2.00902e+06	3263.32	2.07203e+06	1.11578e+06	1.52265e+06	1.6864e+06	594767	177955	881928	443475	997423	882847	240436	467180	666801	1.24621e+06
PC(18:1_21:1)	PC	M+HCOO	872.639	15.22	C48 H91 O10 N1 P1	2.39121e+06	9119.19	2.18486e+06	2.86143e+06	3.15629e+06	3.72114e+06	681592	5.09763e+06	1.85029e+06	2.21914e+06	2.08547e+06	1.79322e+06	2.05143e+06	1.9507e+06	1.80808e+06	1.84422e+06
PC(19:1_20:2)	PC	M+HCOO	870.623	14.2327	C48 H89 O10 N1 P1	553188	0	961384	650975	777515	959364	381069	2.37827e+06	1.00262e+06	1.23646e+06	1.10893e+06	1.10328e+06	980873	1.03477e+06	780131	709296
PC(19:1_20:4)	PC	M+HCOO	866.592	12.6785	C48 H85 O10 N1 P1	1.2325e+06	10569.2	1.02566e+06	1.64556e+06	584293	641475	184563	3.00533e+06	2.47508e+06	2.1677e+06	2.86694e+06	1.32936e+06	1.38471e+06	1.43861e+06	867394	1.08801e+06
PC(16:0_24:0)	PC	M+HCOO	890.686	17.7036	C49 H97 O10 N1 P1	1.02302e+06	992.025	1.00246e+06	1.03463e+06	1.48689e+06	1.60641e+06	373737	2.7363e+06	132579	214584	164868	161420	555364	577153	653899	552100
PC(16:0_24:1)	PC	M+HCOO	888.67	16.8844	C49 H95 O10 N1 P1	57545.7	888.327	6378.78	1314.76	48271.6	123108	11979	71960.1	16686.7	41364.8	45215.6	44087.7	12191.3	43421.5	26284.3	687.921
PC(18:1_22:1)	PC	M+HCOO	886.654	15.8088	C49 H93 O10 N1 P1	8.81224e+06	192140	7.2636e+06	1.09769e+07	1.05228e+07	1.13959e+07	3.11414e+06	1.39342e+07	5.70774e+06	6.80972e+06	6.31755e+06	5.07421e+06	5.46284e+06	6.92655e+06	5.92198e+06	5.63453e+06
PC(18:1_22:2)	PC	M+HCOO	884.639	14.838	C49 H91 O10 N1 P1	3.75535e+06	23652.6	3.56938e+06	4.56794e+06	4.1336e+06	5.21671e+06	1.32957e+06	8.35061e+06	3.53266e+06	4.35917e+06	4.28297e+06	2.50089e+06	3.70629e+06	3.82757e+06	2.88682e+06	2.96184e+06
PC(18:1_22:3)	PC	M+HCOO	882.623	13.9569	C49 H89 O10 N1 P1	7.042e+06	136119	6.62258e+06	8.94812e+06	3.00547e+06	4.68995e+06	1.32595e+06	1.10931e+07	7.01096e+06	8.10202e+06	7.27543e+06	5.91691e+06	6.12521e+06	6.46296e+06	4.55006e+06	4.82331e+06
PC(18:0_22:4)	PC	M+HCOO	882.623	14.3083	C49 H89 O10 N1 P1	835703	0	811642	912587	913452	1.26244e+06	298870	1.82748e+06	1.18243e+06	1.42469e+06	1.31415e+06	1.0809e+06	1.03086e+06	1.01261e+06	759772	813238
PC(20:0_20:4)	PC	M+HCOO	882.623	14.679	C49 H89 O10 N1 P1	298269	0	249753	361803	304387	481245	79799.9	906234	422860	511554	448278	364248	254503	340091	244182	153473
PC(18:1e_22:3)	PC	M+HCOO	868.644	14.81	C49 H91 O9 N1 P1	718242	0.003	646223	788007	1.87524e+06	2.39863e+06	567910	3.57902e+06	4.78526e+06	6.28782e+06	5.71102e+06	4.63931e+06	2.51637e+06	2.83754e+06	1.92229e+06	1.82205e+06
PC(20:0e_20:4)	PC	M+HCOO	868.644	15.4202	C49 H91 O9 N1 P1	203068	366.865	209703	383076	543068	590948	111231	1.01686e+06	943356	1.22236e+06	1.05663e+06	1.07536e+06	496744	503672	433425	481033
PC(18:1_22:4)	PC	M+HCOO	880.607	13.0349	C49 H87 O10 N1 P1	1.68944e+07	371761	1.69323e+07	2.22486e+07	4.66511e+06	4.16932e+06	1.61493e+06	1.45658e+07	1.07644e+07	1.36637e+07	1.25435e+07	9.7572e+06	1.10606e+07	1.25139e+07	7.6804e+06	8.39396e+06
PC(20:1_20:4)	PC	M+HCOO	880.607	13.3157	C49 H87 O10 N1 P1	5.52427e+06	438737	4.4984e+06	7.43831e+06	1.85651e+06	2.25803e+06	524081	5.94486e+06	5.04129e+06	6.10575e+06	4.98336e+06	3.74635e+06	4.97031e+06	5.47568e+06	3.02673e+06	3.55997e+06
PC(18:1e_22:4)	PC	M+HCOO	866.628	13.8852	C49 H89 O9 N1 P1	7053.27	0	3942.18	0	2.97897e+06	3.69887e+06	1.06959e+06	5.55609e+06	6.42093e+06	7.82857e+06	7.15453e+06	6.70984e+06	3.50138e+06	3.73216e+06	2.6541e+06	2.73372e+06
PC(18:0e_22:5)	PC	M+HCOO	866.628	14.1655	C49 H89 O9 N1 P1	14956.4	0	15342.4	12038	1.69527e+06	2.13901e+06	623437	2.43364e+06	2.51616e+06	2.71821e+06	2.82376e+06	1.84867e+06	1.46442e+06	1.64623e+06	1.12734e+06	1.26791e+06
PC(18:1_22:5)	PC	M+HCOO	878.592	12.055	C49 H85 O10 N1 P1	5.53865e+06	281525	6.76533e+06	1.03056e+07	1.61601e+06	2.27385e+06	768380	2.40937e+06	741025	3.65521e+06	3.25177e+06	3.31528e+06	4.29116e+06	5.07692e+06	2.30752e+06	3.12896e+06
PC(20:1_20:5)	PC	M+HCOO	878.592	12.4215	C49 H85 O10 N1 P1	863520	24864.1	2.11622e+06	1.50401e+06	3.92057e+06	2.52189e+06	1.56481e+06	1.07849e+07	3.97632e+06	4.96744e+06	5.30285e+06	4.5706e+06	3.34882e+06	4.43612e+06	3.42145e+06	3.78959e+06
PC(18:0e_22:6)	PC	M+HCOO	864.612	13.722	C49 H87 O9 N1 P1	129813	8369.09	6151.62	250954	3.12228e+06	4.35784e+06	1.35535e+06	4.87389e+06	5.15585e+06	6.30182e+06	5.27963e+06	4.69795e+06	2.32584e+06	2.52065e+06	1.90966e+06	2.06982e+06
PC(18:1_22:6)	PC	M+HCOO	876.576	11.5844	C49 H83 O10 N1 P1	2.04297e+07	542759	1.92568e+07	2.76607e+07	1.47787e+07	1.77924e+07	4.72975e+06	3.38475e+07	1.2178e+07	1.74413e+07	1.5644e+07	1.25466e+07	1.99062e+07	2.04569e+07	1.17349e+07	1.28632e+07
PC(18:1e_22:6)	PC	M+HCOO	862.597	13.5151	C49 H85 O9 N1 P1	1.426	900.049	14366.1	19480.7	1.12507e+06	1.24464e+06	342857	2.05653e+06	1.37602e+06	1.81678e+06	1.57565e+06	1.24938e+06	895050	897892	614687	544096
PC(18:2_22:6)	PC	M+HCOO	874.56	10.498	C49 H81 O10 N1 P1	366171	1153.56	717827	1.06563e+06	1.33362e+06	1.5988e+06	372138	4.04701e+06	1.59303e+06	2.58909e+06	2.18387e+06	1.60473e+06	2.0751e+06	1.81961e+06	1.26831e+06	1.3286e+06
PC(18:2e_22:6)	PC	M+HCOO	860.581	12.1553	C49 H83 O9 N1 P1	0	0	0	4903.53	688043	718713	183385	1.29661e+06	1.0125e+06	1.35368e+06	1.12475e+06	910886	649913	574867	379149	409999
PC(18:1_23:1)	PC	M+HCOO	900.67	16.3407	C50 H95 O10 N1 P1	2.43438e+06	20033.9	2.52216e+06	2.49844e+06	2.59194e+06	2.73012e+06	865016	1.59917e+06	1.16516e+06	1.44095e+06	1.39446e+06	1.23527e+06	1.42167e+06	1.22821e+06	1.55335e+06	1.78071e+06
PC(26:0_16:0)	PC	M+HCOO	918.717	18.3619	C51 H101 O10 N1 P1	767051	7645.84	718440	664422	1.29454e+06	1.48091e+06	388961	2.23578e+06	128627	205040	160668	116577	336957	463403	552058	582906
PC(18:1_24:0)	PC	M+HCOO	916.701	17.7172	C51 H99 O10 N1 P1	3.07143e+06	46488.8	4.87197e+06	3.02967e+06	8.55931e+06	1.00009e+07	1.9786e+06	9.12026e+06	1.14409e+06	1.39449e+06	1.22894e+06	1.53836e+06	2.45888e+06	1.64307e+06	2.65257e+06	2.70662e+06
PC(20:4_22:6)	PC	M+HCOO	898.56	10.1984	C51 H81 O10 N1 P1	598449	1595.55	556152	751159	420941	528246	123017	1.62223e+06	629409	994905	820761	654747	655084	660464	422190	441973
PC(18:1_24:1)	PC	M+HCOO	914.686	16.822	C51 H97 O10 N1 P1	8.95711e+06	126420	8.28424e+06	9.63068e+06	7.62621e+06	9.856e+06	1.94706e+06	1.16647e+07	2.77372e+06	3.63e+06	3.22322e+06	3.1425e+06	4.4745e+06	4.60301e+06	4.31312e+06	4.95935e+06
PC(18:1_24:2)	PC	M+HCOO	912.67	15.9187	C51 H95 O10 N1 P1	2.20725e+06	1503.21	2.2479e+06	2.38236e+06	1.78657e+06	3.44176e+06	860936	4.41265e+06	1.61349e+06	1.36988e+06	1.44193e+06	1.48138e+06	1.61447e+06	1.10058e+06	1.64368e+06	1.61665e+06
PC(42:5)	PC	M+HCOO	908.639	14.0502	C51 H91 O10 N1 P1	6.0312e+06	18638.8	4.63067e+06	7.5547e+06	273009	1.2203e+06	399067	2.67199e+06	4.15786e+06	4.37219e+06	4.43429e+06	3.67725e+06	2.7756e+06	3.82798e+06	1.9755e+06	2.86497e+06
PC(22:1_20:4)	PC	M+HCOO	908.639	14.3677	C51 H91 O10 N1 P1	2.05025e+06	39205.6	1.96539e+06	2.35645e+06	678197	1.15822e+06	280415	2.34199e+06	793264	1.00094e+06	890862	766007	1.09468e+06	1.3464e+06	839520	1.25894e+06
PC(20:1_22:5)	PC	M+HCOO	906.623	13.0912	C51 H89 O10 N1 P1	1.65943e+07	355863	1.5097e+07	2.17857e+07	2.29286e+06	2.86608e+06	634403	7.55523e+06	5160581	6.98813e+06	6.53836e+06	4.72438e+06	8.88542e+06	8.98503e+06	6.33064e+06	5.88309e+06
PC(22:3_20:4)	PC	M+HCOO	904.607	12.4384	C51 H87 O10 N1 P1	252974	0	27995.8	368055	1.21622e+06	1.60476e+06	432421	2.92468e+06	1.05652e+06	1.48855e+06	1.22383e+06	1.17422e+06	944062	1.03952e+06	729776	1.20724e+06
PC(20:1_22:6)	PC	M+HCOO	904.607	12.9101	C51 H87 O10 N1 P1	2.0377e+06	8007.98	1.96563e+06	2.51442e+06	1.03955e+06	1.2579e+06	379799	2.51183e+06	1.01227e+06	1.35279e+06	1.07671e+06	861366	1.48675e+06	1.59891e+06	998230	1.07981e+06
PC(25:1_18:1)	PC	M+HCOO	928.701	17.2572	C52 H99 O10 N1 P1	814057	1229.28	787954	919541	950869	940284	184059	1.31617e+06	392250	509248	369503	366578	343329	240195	510311	582409
PC(26:0_18:1)	PC	M+HCOO	944.733	18.3755	C53 H103 O10 N1 P1	2.20445e+06	46193.8	2.00559e+06	1.56719e+06	7.66852e+06	7.74426e+06	1.75333e+06	7.753e+06	561521	811784	827424	776740	1.9095e+06	1.18247e+06	1.89392e+06	2.01341e+06
PC(26:1_18:1)	PC	M+HCOO	942.717	17.627	C53 H101 O10 N1 P1	5.46495e+06	48244.9	4.93987e+06	5.45443e+06	6.47173e+06	7.03001e+06	1.74854e+06	8.86643e+06	1.43498e+06	1.86655e+06	1.68198e+06	1.69219e+06	2.53958e+06	2.42511e+06	3.12685e+06	3.19716e+06
PC(24:1_20:4)	PC	M+HCOO	936.67	15.7548	C53 H95 O10 N1 P1	965289	1173.67	951274	1.05104e+06	427426	523662	104747	1.16512e+06	444674	544071	511084	425588	435202	488138	441439	463390
PC(28:1_18:1)	PC	M+HCOO	970.748	18.2811	C55 H105 O10 N1 P1	611627	6415.35	501235	651069	1.60103e+06	1.65873e+06	459238	1.63767e+06	329327	495372	386600	394098	517664	524172	624766	511012
PC(26:0_20:4)	PC	M+HCOO	966.717	17.6965	C55 H101 O10 N1 P1	176498	915.143	162393	186988	471668	587579	177098	1.10829e+06	148643	151588	176030	164683	191784	184932	221928	262313
PC(26:1_20:4)	PC	M+HCOO	964.701	16.7828	C55 H99 O10 N1 P1	835010	2523.03	635024	924849	412651	548770	109170	1.48469e+06	401332	555842	466973	443672	422461	460278	420301	470037
PC(50:7)	PC	M+HCOO	1016.73	16.4903	C59 H103 O10 N1 P1	4745.31	1628.61	5827.37	11429.1	2.30408e+06	2.57666e+06	710074	3.01641e+06	1.15e+06	1.49175e+06	1.43917e+06	1.22515e+06	857407	967928	881789	1.05882e+06
PC(52:7)	PC	M+HCOO	1044.76	17.3013	C61 H107 O10 N1 P1	0	3623.02	0	1495.64	1.456e+06	1.81529e+06	436450	1.77055e+06	494850	742837	597504	585668	386062	318050	465388	524733
PE(16:0_14:0)	PE	M-H	662.477	12.2598	C35 H69 O8 N1 P1	1.3594e+06	21953.6	1.11587e+06	1.93897e+06	314718	325658	87689.8	775451	321860	547736	334341	296750	779123	734388	466494	540731
PE(16:1e_14:0)	PE	M-H	646.482	12.986	C35 H69 O7 N1 P1	13871.6	0	7406.76	53824	616232	689231	209733	1.8e+06	277963	465273	248023	242967	397409	467755	301100	296590
PE(15:0_16:0)	PE	M-H	676.492	12.6792	C36 H71 O8 N1 P1	704249	4925.69	552504	854487	19536.2	0	2582.75	44194.2	5441.85	16711.9	1814.01	3149.22	207553	90499.7	149684	153514
PE(16:0e_16:0)	PE	M-H	676.529	14.5555	C37 H75 O7 N1 P1	37068.6	0	50552.1	132142	2.17692e+06	2.21831e+06	624778	2.4891e+06	825826	1.26975e+06	1.00467e+06	793160	923341	1.01273e+06	811532	836216
PE(16:0_16:1)	PE	M-H	688.492	12.3651	C37 H71 O8 N1 P1	2.55042e+07	997467	1.98582e+07	3.31608e+07	7.43637e+06	8.54813e+06	2.29626e+06	9.64517e+06	4.51743e+06	6.71204e+06	5.34618e+06	4.52666e+06	1.25385e+07	1.42808e+07	8.72905e+06	9.99022e+06
PE(16:1_16:1)	PE	M-H	686.477	11.0253	C37 H69 O8 N1 P1	5.44477e+06	108484	4.06713e+06	7.09549e+06	1.12213e+06	1.25948e+06	304422	971993	335212	615727	369224	308866	2.47021e+06	2.26945e+06	1.34367e+06	1.62795e+06
PE(16:1e_16:1)	PE	M-H	672.497	13.0757	C37 H71 O7 N1 P1	1.31039e+06	10424	1.09085e+06	1.59455e+06	7.74127e+06	8.01582e+06	2.02293e+06	7.14721e+06	2.53157e+06	4.48216e+06	3.47467e+06	2.7017e+06	3.8924e+06	4.35917e+06	2.30536e+06	2.9205e+06
PE(15:0_18:1)	PE	M-H	702.508	12.7483	C38 H73 O8 N1 P1	2.94738e+06	58379.5	2.39098e+06	3.65478e+06	165772	174181	1607.75	447901	129686	246839	183590	10369.5	977324	793509	688387	496343
PE(17:1_16:0)	PE	M-H	702.508	13.0736	C38 H73 O8 N1 P1	7.68864e+06	205719	5.48539e+06	8.44819e+06	3.38387e+06	3.58758e+06	1.01528e+06	5.62944e+06	2.40523e+06	3.71412e+06	2.84352e+06	2.37834e+06	3.95258e+06	4.40255e+06	2.98795e+06	3.24216e+06
PE(17:1_16:1)	PE	M-H	700.492	11.7461	C38 H71 O8 N1 P1	1.7072e+06	12955.7	1.34234e+06	2.00199e+06	759633	814530	132936	1.08538e+06	306566	647037	404380	309896	932099	927596	601768	664050
PE(16:1e_17:1)	PE	M-H	686.513	13.7527	C38 H73 O7 N1 P1	15852.9	0	116977	35303.2	3.70188e+06	3.91127e+06	1.0387e+06	4.28587e+06	2.06364e+06	2.84694e+06	2.30338e+06	1.86194e+06	1.87596e+06	1.98737e+06	1.44985e+06	1.55177e+06
PE(18:0e_16:0)	PE	M-H	704.56	15.8156	C39 H79 O7 N1 P1	65974.8	0	16336	57479.2	3.15184e+06	3.5941e+06	900134	4.44838e+06	1.75936e+06	2.79422e+06	2.0646e+06	1.46969e+06	1.37746e+06	1.45444e+06	1.29231e+06	1.33215e+06
PE(16:0_18:1)	PE	M-H	716.524	13.7456	C39 H75 O8 N1 P1	1.59436e+08	8.89362e+06	1.29398e+08	2.06845e+08	9.15378e+07	9.75182e+07	2.91146e+07	1.4056e+08	7.07648e+07	1.08337e+08	8.24379e+07	6.52065e+07	1.09091e+08	1.09949e+08	7.84944e+07	8.00437e+07
PE(18:1e_16:0)	PE	M-H	702.544	15.6637	C39 H77 O7 N1 P1	574275	671.141	468085	619115	1.258e+07	1.3605e+07	3.34904e+06	2.99017e+07	8.29173e+06	1.28309e+07	9.66492e+06	8.57489e+06	6.26e+06	6.79205e+06	6.61942e+06	6.79953e+06
PE(16:1e_18:2)	PE	M-H	698.513	13.089	C39 H73 O7 N1 P1	621008	1398.24	507898	755515	2.10434e+06	2.27454e+06	639055	2.23346e+06	1.22285e+06	1.80734e+06	1.4566e+06	1.11919e+06	1.20889e+06	1.24147e+06	998429	1.00044e+06
PE(34:5e)	PE	M-H	694.482	11.5704	C39 H69 O7 N1 P1	719332	1416.83	611695	979702	198895	212502	46279.3	559157	198193	370201	284820	233284	406258	467650	293024	311653
PE(17:0_18:1)	PE	M-H	730.539	14.4053	C40 H77 O8 N1 P1	1.85299e+07	436364	1.48896e+07	2.28569e+07	1.27025e+07	1.57365e+07	4.3058e+06	2.57062e+07	1.22381e+07	1.75307e+07	1.35577e+07	1.10355e+07	1.42304e+07	1.53508e+07	1.1888e+07	1.13622e+07
PE(17:1_18:1)	PE	M-H	728.524	13.1049	C40 H75 O8 N1 P1	2.01268e+07	573456	1.5901e+07	2.60721e+07	1.10363e+07	1.26539e+07	3.04665e+06	2.10395e+07	7.72367e+06	1.23208e+07	9.26099e+06	6.83853e+06	1.31668e+07	1.40088e+07	9.77209e+06	1.04282e+07
PE(16:1e_19:1)	PE	M-H	714.544	15.068	C40 H77 O7 N1 P1	433866	0	146530	500286	5.93711e+06	7.73012e+06	1.75118e+06	8.84449e+06	3.68591e+06	5.47943e+06	4.20144e+06	3.48434e+06	3.07019e+06	4.14076e+06	2.37973e+06	2.17145e+06
PE(17:1_18:2)	PE	M-H	726.508	12.0091	C40 H73 O8 N1 P1	45372.7	0	306236	95527.2	774561	883210	50980	1.41402e+06	736743	1.09487e+06	847761	751020	646095	799001	607310	595683
PE(35:3e)	PE	M-H	712.529	13.748	C40 H75 O7 N1 P1	21529.7	0	19525.9	25545.4	898068	1.01129e+06	288556	1.3259e+06	649638	958876	633972	562989	483794	563807	86025.8	253258
PE(18:0_18:1)	PE	M-H	744.555	15.0392	C41 H79 O8 N1 P1	1.77577e+08	6.64728e+06	1.62398e+08	2.37492e+08	1.65185e+08	2.04259e+08	5.3406e+07	2.44932e+08	1.17965e+08	1.66629e+08	1.35114e+08	1.09486e+08	1.51033e+08	1.53934e+08	8.73623e+07	8.5432e+07
PE(16:1e_20:0)	PE	M-H	730.576	16.7838	C41 H81 O7 N1 P1	280604	0	242297	309706	1.07201e+06	1.28553e+06	292876	2.5134e+06	450854	798607	596923	526867	525970	560732	489968	623037
PE(18:1e_18:1)	PE	M-H	728.56	15.6825	C41 H79 O7 N1 P1	2.39267e+06	46927.9	1.90248e+06	2.66916e+06	5.64508e+07	6.15262e+07	1.4826e+07	6.43585e+07	2.73105e+07	4.09171e+07	3.07416e+07	2.66417e+07	2.12527e+07	2.18924e+07	2.14139e+07	2.32656e+07
PE(16:0_20:3)	PE	M-H	740.524	13.4162	C41 H75 O8 N1 P1	2.90729e+06	91295.5	2.31355e+06	3.06091e+06	1.37929e+06	1.25563e+06	306830	1.9631e+06	763461	1.15316e+06	848388	717195	1.17516e+06	1.22027e+06	1.07115e+06	1.15048e+06
PE(18:2e_18:1)	PE	M-H	726.544	14.4089	C41 H77 O7 N1 P1	2.40664e+06	40277.2	2.37172e+06	3.32173e+06	2.42699e+07	2.9135e+07	7.91767e+06	2.73522e+07	1.58719e+07	2.24855e+07	2.00577e+07	1.45095e+07	1.33648e+07	1.4564e+07	1.14169e+07	1.48199e+07
PE(18:1e_18:2)	PE	M-H	726.544	14.663	C41 H77 O7 N1 P1	344445	1325.09	59101.5	451856	3.59545e+06	3.54298e+06	1.09997e+06	4.96435e+06	2.44178e+06	3.40582e+06	3.02171e+06	2.30519e+06	1.96945e+06	2.26692e+06	1.84141e+06	2.09059e+06
PE(18:2_18:2)	PE	M-H	738.508	11.6466	C41 H73 O8 N1 P1	1.7193e+06	34245.5	1.61425e+06	3.24708e+06	428978	1.48732e+06	420235	3.06649e+06	1.43203e+06	2.39548e+06	2.09671e+06	1.76314e+06	1.47522e+06	1.05253e+06	1.16367e+06	989174
PE(16:0_20:4)	PE	M-H	738.508	12.3476	C41 H73 O8 N1 P1	4.45896e+07	1.98708e+06	3.72619e+07	5.81943e+07	9.42843e+06	1.07359e+07	3.46364e+06	1.67487e+07	1.23809e+07	1.82161e+07	1.42044e+07	1.08279e+07	2.47005e+07	2.51038e+07	1.55533e+07	1.75353e+07
PE(16:0e_20:4)	PE	M-H	724.529	13.2479	C41 H75 O7 N1 P1	3779.19	0	2766.04	10822.1	2.09821e+06	1.93176e+06	389592	1.53441e+06	1.97754e+06	2.52025e+06	2.17186e+06	1.33342e+06	1.41583e+06	1.48891e+06	1.4568e+06	941139
PE(16:1e_20:4)	PE	M-H	722.513	13.0073	C41 H73 O7 N1 P1	1.04526e+07	295593	8.78351e+06	1.21209e+07	8.9542e+07	1.00252e+08	2.98709e+07	1.32557e+08	7.30288e+07	1.10457e+08	8.75232e+07	6.59312e+07	5.91444e+07	6.63601e+07	4.47337e+07	4.90445e+07
PE(16:1_20:5)	PE	M-H	734.477	10.0548	C41 H69 O8 N1 P1	1.1285e+06	17751.9	777713	1.17215e+06	195669	238572	52741.3	313947	73304.9	119565	102476	53770.7	434538	416660	271786	305031
PE(16:1e_20:5)	PE	M-H	720.497	12.025	C41 H71 O7 N1 P1	2.67011e+06	10653.2	2.2462e+06	2.50151e+06	1.78755e+07	1.84603e+07	5.47262e+06	1.92589e+07	5.59097e+06	8.66587e+06	6.84227e+06	6.33812e+06	7.7433e+06	7.79319e+06	6.65998e+06	6.89308e+06
PE(19:1_18:0)	PE	M-H	758.571	15.6544	C42 H81 O8 N1 P1	4.10328e+06	14247.5	5.6271e+06	4.60659e+06	1.7518e+06	2.86681e+06	401401	4.85255e+06	1.47818e+06	2.56222e+06	1.59685e+06	1.25097e+06	1.62273e+06	1.71331e+06	1.68596e+06	1.62477e+06
PE(19:1_18:1)	PE	M-H	756.555	14.3639	C42 H79 O8 N1 P1	1.45996e+07	263201	1.17687e+07	1.7166e+07	4.97238e+06	5.8087e+06	1.24504e+06	1.33658e+07	5.36878e+06	6.70124e+06	5.7828e+06	4.02524e+06	7.15491e+06	7.77853e+06	5.92287e+06	6.56882e+06
PE(37:2e)	PE	M-H	742.576	16.2397	C42 H81 O7 N1 P1	263785	318.24	255186	271984	2.04207e+06	2.46745e+06	375903	1.86898e+06	1.23467e+06	1.87176e+06	1.54294e+06	1.35469e+06	1.11503e+06	989090	1.20898e+06	1.23235e+06
PE(19:1_18:2)	PE	M-H	754.539	13.328	C42 H77 O8 N1 P1	642642	4733.87	134374	564355	427475	375573	124173	1.02367e+06	641081	946860	567156	494814	444199	536820	283989	504142
PE(17:0_20:3)	PE	M-H	754.539	13.628	C42 H77 O8 N1 P1	967982	3888.45	874050	1.04831e+06	556913	693957	173055	1.16374e+06	470138	946142	410506	399041	632033	732048	489504	639691
PE(17:0_20:4)	PE	M-H	752.524	13.0405	C42 H75 O8 N1 P1	7.01098e+06	181442	5.54373e+06	8.37321e+06	1.48471e+06	1.63844e+06	459089	3.87576e+06	2.82655e+06	4.42259e+06	3.38845e+06	2.625e+06	3.57347e+06	4.03912e+06	2.72746e+06	2.96428e+06
PE(17:1_20:4)	PE	M-H	750.508	11.7217	C42 H73 O8 N1 P1	2.02657e+06	1533.29	1.55025e+06	933969	944967	905346	239294	1.95302e+06	1.29714e+06	2.14941e+06	1.52625e+06	1.26993e+06	1.74545e+06	1.41373e+06	635038	1.0267e+06
[truncated: 139 more rows]

## Sheet: normalized
name	Class	MainIon	mz	rtmin	IonFormula	T1-1	T1-2	T1-3	T1-4	si-T1-1	si-T1-2	si-T1-3	si-T1-4	QC1	QC2	QC3	QC4		reT1	reT2	reT3	reT4	resiT1	resiT2	resiT3	resiT4
[truncated: 1,093 more rows]

## Sheet: lipid_classification_stats
name	Class			Class	count
[truncated: 1,921 more rows]
